# Supplementary material for: Deciphering Microenvironmental Heterogeneity by Scalable Niche Guided Module Discovery
Source: Research Square preprint supplement (doi:10.21203/rs.3.rs-7243521/v1), 2025-08-25
Supplement: Supplementary file 2 [file Supplementary Table S1-S5.xlsx]

## Sheet: S1
Supplementary Table S1: Niche scores in the PDAC dataset
index	Niche1	Niche2	Niche3	Niche4	Niche5	Niche6	Niche7	Niche8	Niche9	Niche10	Niche11	Niche12
1	0	0.00759437	0.0695052	0.20343	0.203652	0.119817	0.365043	0.0622755	0.0505432	0	0.0150635	0.107225
2	0	0	0	0	0	0	0	0	0.189505	0	0	0.107978
3	0	0	0.1705	0.304535	0	0	0	0	4.22526e-05	0	0	0.117253
4	0	0	0	0	0	0	0	0	0	0	0	0.14187
5	0	0	0	0	0	0	0	0	0.376301	0	0	0
6	0	0	0.265262	6.38767e-05	0	2.99493e-05	2.50425e-07	0	1.55637e-05	1.22049e-05	1.40589e-05	0
7	0	0.170093	0.114896	0	0	0	0.237427	0.192744	0.33014	0	0	0
8	0	0.212468	0	0	0	0	0	0.119865	0.417599	0	0	0
9	0	0.211848	0.335864	0.120565	0.20248	0.445892	0	0.139758	0.447542	0	0.00327142	0.0241051
10	0.00151538	0.298802	0.356605	0	0.406768	0	0	0.27478	0	0.200657	0	0
11	0.00347746	0.323174	0.520001	0	0.438433	0	0	0.222099	0.342339	0	0.371762	0
12	0	0.443489	0	0	0.556889	0	0.546058	0.365804	0.000684966	0	0	0
13	0.836545	0	0.419373	0	0.510802	0	0	0	0	0	0	0
14	0.00617863	0	0.598653	0	0	0.128965	0	0	0	0	0	0
15	0.00534075	0	0.532777	0	0	0	0	0	0	0	0	0.12444
16	0	0	0	0	0	0	0	0	0	0	0	0
17	0	1.77545	0	0	0	0	0	0	0	0	0	0
18	0.00151077	0.000749981	0	0	0	0	0	0.472102	0	0	0	0
19	0	0	0.0687776	0	0	0.920005	0.29413	0.0769247	0.00259689	0	0.450721	0.0870305
20	0	0	0	0.402568	0	0	0	0.152366	0	0	0	0.13754
21	0	0	0	0	0	0	0	0	0	0.363329	0	0.133245
22	0	0	0	0.385705	0	0	0	0	0	0	0	0.153909
23	0	0	0	0	0	0	0	0	0	0	0	0
24	0	0.440281	0.236264	0.251295	0	0	0	0.237178	9.94931e-06	0	0	0
25	0.000720255	0.23043	0.325453	0	0.319004	0	0	0	0	0	0.474157	0.0867593
26	0	0	0	0	0.217669	0	0.336336	0.1436	0.342742	0	0.446103	0
27	0.551901	0.282391	0.230075	0.161715	0.259764	0.499899	0	0	0	0	0	0.084194
28	0	0	0.248853	0	0	0	0.429955	0	0.000103209	0	4.67928e-05	0
29	0	0.392753	0	0.224499	0	0.615589	0.563923	0	0.458656	0	0	0
30	0.00224071	0.511042	0.488422	0	0	0	0	0	0	0	0.738923	0
31	0.00359571	0	0.542391	0	0.763801	0	0	0	0	0	0	0
32	0	0.570321	0	0	0	0	0	0	0	0	0.551147	0
33	0	0	0	0	0	0	0	0	0	0	0	0
34	1.82409	0.716122	0.706552	0	0	0	0	0.544948	0	0	0	0
35	0	1.07683	0	0	0	0	0	0	0	0	0	0
36	0	0	0.557634	0	0	0	0.559382	0	0.000988663	0	0.486523	0
37	2.94884	0.000968508	0.588383	0	0	0	0	0.569065	0	0	0	0
38	0.00359382	0	0.451011	0	0	0.00227122	0	0.402176	0	0	0	0.183542
39	0	1.35863	0	0.342095	0.280698	0	0.176564	0.347922	0.0640625	0	0.0023055	0.148881
40	0	0	0	0	0	0	0.781227	0	0.00137848	0	0.00195755	0
41	0	0	9.50342e-06	0.000365798	1.05724e-05	9.41398e-05	0	0.209823	0	0	0.000139784	4.07929e-05
42	0	0	0	0	0	0	0.663899	0.246213	0	0	1.06732	0
43	0	0.601599	0	0.343488	0	0	0	0	0	0	1.02914	0
44	0	0.689304	0.305201	0.258702	0.306134	0.000138814	0	0.235599	1.52322e-05	0	0.000146608	0.000165285
45	0.000415112	0.324219	0.220715	0	0	0	0	0.170371	0	0	0	0
46	0	0.340908	0	0	0	0	0	0	0.506522	0	0.893629	0
47	0.000654958	0	0.300522	0	0.190266	0.32765	0	0.305882	0	0	0.574988	0
48	0	0	0	0.222216	0.390098	0	0.918141	0	0	0	0	0
49	0.0014219	0.482214	0.436502	0.0001927	0	0	0.515408	0.336666	0	0	0	0
50	0.00080355	0.514631	0.498815	0	0	0	0	0	0	0	0	0
51	0.00049977	0	0.709084	0	0	0	0	0	0	0.405908	0	0
52	0.00462105	0	0	0	0.698375	0	0.756751	0.484777	0	0.421689	0	0
53	0	0	0	0	0	0	0	0	0	0	0	0
54	0.00474094	0.719744	0.602975	0	0	0	0	0	0	0	0	0.0922429
55	0.00630121	0.000271854	0.745897	0	0	0	0	0	0	0	0	0
56	0	0	0	0	0	0	0	0	0	0	0	0
57	0	0	0	0	0	0	0	0	0	0	0	0
58	0	0	0	0	0	0	0	0	0	0	0	0.292269
59	2.66512	0	0.646603	0	0	0	0.435658	0	0.00182523	0	0.00212952	0.259559
60	0	0.00744897	0.33144	0.577153	0.515673	0	0.409013	0.341713	0.0544359	0	0.254853	0.181187
61	0	0	0.146245	0	0	0	0.455329	0.155004	0.243862	0.19767	0.532177	0.131971
62	0	0	0	0	0	1.07516	0.399886	0.101406	0	0	0.628616	0
63	0	0.0016616	0	0.000849652	0.188516	0	0	0.144066	0	0	0.566334	0.0750143
64	0	0	0.121532	0.252754	0	0	0.351904	0.0935592	0.000910178	0	0.00110776	0.0649822
65	0	1.81673e-05	0.216706	0.17854	0.200532	0.171351	0.406746	0	0.00762499	0	0.0188501	0.0736599
66	0	0	0	0	0.397156	0	0	0.245351	4.08633e-06	0	0	0
67	0.000514993	0	0.500889	0	0.476759	0	0	0	0	0	0	0.132203
68	0	1.42907e-05	0	0	0	0	0	0.349964	0	0	0	0
69	0	0	1.53205e-05	0	0.462626	0	0	0	2.36815e-05	0	0	0
70	0.00212204	0	0	0.000284058	0	0	0.551441	0.296628	0	0.306182	0	0.0949286
71	0	0	0	0	0	0	0	0	0	0	0	0
72	0.000233325	0.571721	0	0	0	0	0	0.472711	0	0	0	0
73	0	0	0	0	0	0	0	0	0	0	0	0
74	0	0	0	0	0	0	0	0	0	0	0	0
75	2.38928	0	0	0	0	0	0	0	8.74198e-08	0	0	0
76	0	0	0	0	1.63137	0	0	0	0	0	0	0
77	0.00167717	0.000863596	0	0	0	0	0	0.697428	0	0	0	0
78	0.00402074	0	1.19584	0	0	0	0.557558	0.751144	0.000568132	0.529995	0.000285502	0
79	0	1.89754	0.841399	1.08004	1.16149	0.00240899	0	0	0	0.634403	0.00149195	0.00266922
80	4.70338	0.00704436	0.662325	0.991309	0.965129	0	0	0	0	0.541805	0.571227	0.405874
81	0	0	0.44082	0.711531	0	0	0	0.340966	0	0	0.529312	0
82	0.619905	0.199222	0.0479535	0.112881	0	0.0822537	0.365886	0.0829638	0.305285	0.100598	0.459677	0.0346305
83	0	0	0.235117	0.279153	0.11347	0.107604	0.375772	0.111152	0.328391	0	0.582937	0.000824434
84	0.381432	0.19881	0.105714	0	0	0	0.347981	0.0499061	0.186765	0	0.306299	0.0382363
85	0	0.000775052	0.168276	0	0.165714	0	0.445663	0.111342	0.187693	0	0.00124507	0.060487
86	0	0	0.179165	0.116371	0.246612	0	0.399263	0.138612	0.238503	0	0.692753	0.0449025
87	0	0	0.114268	0.126294	0.426914	0.392589	0.565441	0.0886291	0.284923	0	0.00660169	0.000358346
88	0	0	0.440088	0	0	0	0.78373	0.26681	0.000930925	0	0.00126278	0
89	0	0	1.00255e-05	0	0.577853	0	0	0	1.5687e-05	0	0	0
90	0	0	0	0	0	0	0	0	0	0	0	0.12273
91	0	0	0	0	0.548519	0	0	0.365444	2.98876e-05	0	0	0
92	0	0	0	0.242743	0	0	0	0	0	0	0.702258	0
93	0	0	0	0.279142	0	0	0	0	0	0	0	0
94	0.803452	0.408962	0	0	0.502047	0	0	0	3.29589e-05	0	0	0
95	0.00355486	0.000630657	0.797942	0	0	0	0	0.759071	0	0	0	0
96	0.0167571	0.00110301	0	0.00837217	0	0	0.859562	0	0	0	0	0
97	0.00731467	0	0	0.40476	0	0	0.463118	0	0	0	0	0.110344
98	1.70485	1.16951	1.12435	0	1.0626	0	0	0.791781	0	0	0	0
99	0.00108419	0	0	0	0	0	0	1.12293	0	0.548468	0	0
100	0.00151378	0.000288376	0.694915	0	0	0	0	0.715727	0	0	0	0
101	0	0	1.36314	0	0	0	0	0	6.14842e-07	1.10593e-07	0	0
102	0	0	0.87204	1.17668	0	0	0	0	1.45811e-05	0	0	0.406827
103	0	0	0.756018	0	0	0	0	0	7.69533e-05	0.605433	0	0
104	0	0.251765	0.129748	0	0.105368	0.111877	0.481697	0	0.00529003	0.122743	0.362276	0.0662951
105	0.524389	0	0.248251	0.300105	0	0.125872	0	0.120202	0.00464743	0	0.410732	0
106	0.314108	0.36352	0.172049	0	0.233135	0.473419	0.403155	0.120276	0	0.0884922	0.41163	0.113467
107	0.770784	0.259668	0.116963	0.0860566	0.177664	0.318386	0.462501	0.127721	0.585117	0	0.235843	0.0503592
108	0	0	0.186485	0	0	0	0.281762	0	9.33466e-05	0	0.360916	0.0702465
109	0	0.484383	0.16529	0	0	0.400645	0.443965	0	0	0	0	0
110	0	0	0.619463	0.000144094	0	6.75697e-05	5.50027e-07	0	3.51448e-05	2.75547e-05	3.16952e-05	0
111	0	0.863069	0.419881	0	0	0	0	0	1.46537e-05	0	0	0
112	0	0	0	0	2.7998e-06	0	0	0.400514	0	0	2.3886e-05	3.44014e-06
113	0	0	0	0	0	0	0	0	0	0	0	0
114	0	0	0.783408	0	0	0	0	0	1.31092e-06	0.450613	0	0
115	0	0.485806	0	0	0.72668	0	0	0	5.08046e-05	0	0	0
116	0	0	0	0	0.575059	0.416395	0	0	0	0	0	0
117	0.000354444	0.000276887	0	0	0	0	0	0.674882	0	0	0	0
118	0.00261531	0.000112832	0.9696	0	0	0	0	0	0	0	0	0
119	0.00340562	0.000608368	1.03073	0	0	0	0	0.981029	0	0	0	0
120	0	0	0	0.691462	0	0	0	1.17455	0	0	0	0
121	0	0	0.978626	0.989027	0	0	0	0.566247	0	0	0	0
122	0	2.38102	1.3513	0	1.72452	0	0	1.04318	3.25879e-05	0	0	0.407915
123	0	1.31541	0.657227	0.0006996	0.869984	0.00243051	0	0.876527	0.000127694	0.455674	0.000657639	0.156118
124	0	0	0	1.00994	0	0	0	0.890976	0	0	0	0
125	0	2.69597	0	0	0	0	0	0	0	0	0	0
126	0	0.00192222	0.134954	0.000348632	0.167702	0.327829	0.210427	0.0589116	0.103101	0.0590116	0.527118	0.0461272
127	0.199256	0.108505	0.170427	0.221766	0.168656	0.11749	0.42788	0.0709834	0.308853	0.0527894	0.270968	0.0440028
128	0	0.000947435	0.120692	0.204734	0.179797	0.280365	0.696688	0.0920012	0	0	0.339722	0.0944059
129	0	0	0.0819585	0	0.114908	0.31382	0.265981	0	0.231762	0	0.582796	0.0422037
130	0	0	0.146905	0.128595	0.122274	0.143024	0.275145	0.0708528	0	0	0.613947	0.0754122
131	0.572278	0	0	0	0	0	0.376416	0.109311	0	0	0.453445	0
132	0	0	0	0	0	0	0	0	0	0	0	0
133	0	0	0	0	0	0.703973	0	0	0	0	0	0
134	0	0	0.563718	0.000106784	0	5.01214e-05	3.33708e-07	0	2.62238e-05	2.05324e-05	2.33933e-05	0
135	0	0	2.74205e-05	0	0.725166	0	0	0	3.64892e-05	0	0	0.111525
136	0	0	0	0	0	0	0	0	0	0	0	0
137	0	0	0	0	0	0	0	0	0	0	0	0.124091
138	0	0	0	0.397707	0	0	0	0	0	0	0	0.105757
139	0	0	0	0	0	0	0	0	0	0	0	0
140	0	0	0	0	0	0	0	0	0.252004	0	0	0.195279
141	0.000995556	4.29514e-05	1.335	0	0	0	0	0	0	0	0	0
142	0	1.40744	1.47414	0	1.14822	0	0	0.923583	8.93011e-05	0	0	0
143	0	0	0	1.13617	0.909274	0	0.354125	0.981666	0.00024347	0.87638	0	0.4185
144	0	0	0.855727	0	0	0	0	1.07501	0.0679344	0	0	0.290249
145	0	1.68019	1.03005	0.959186	0	0	0	0	0.000147729	0	0	0
146	0	0	0.940573	0.00071923	0	0.000336294	4.2647e-06	0	0.000171745	0.000135228	0.000160161	0
147	0.305059	0.514628	0.120844	0.189294	0.272089	0	0.584874	0.0361077	0.139656	0.127499	0.235146	0.00169329
148	0.947398	0.340074	0.141234	0.122261	0	0	0.403523	0.053868	0.000540326	0	0.320297	0.0814797
149	0.38671	3.91999e-06	0.115224	0.232852	0.10728	0.0853924	0.391323	0	0.184415	0	0.0100446	0.0701513
150	0	0.000592347	0.21759	0.257909	0.169349	0.35958	0	0.0927977	0	0	0	0.0524442
151	0	0	0.110423	0	0	0	0.481471	0.130783	0.000738696	0	0.000980148	0.0438442
152	0.404632	0.210197	0.100423	0	0.207826	0.196101	0.393388	0.0780832	0.174211	0	0.455179	0.0586537
153	0	0.625445	0.353585	0	0	0	0	0	6.3621e-05	0	0	0
154	0	0	0	0.387586	0	0	0	0	0	0	0	0
155	0.0104621	0.000489102	0.469142	0.00665692	0	0	0.725125	0.364374	0	0	0	1.27004e-06
156	0	0	0.437764	6.43993e-05	0	3.02713e-05	1.32188e-07	0	1.59821e-05	1.24875e-05	1.4019e-05	0
157	0	0	0	0	0	0	0	0	0	0	0	0
158	0.000602972	2.60141e-05	0.876481	0	0	0	0	0	0	0	0	0
159	0.000935267	0.000131353	0.868602	0	0	0	0	0.550846	0	0	0	0
160	0	0	0	0	0.814048	0	0	0	0	0	0.663338	0.118466
161	0.0185406	0	0	0.973221	0	0	0.691635	1.03354	0	0.805529	0	0
162	0	0	0	0	0	0	0	0	0	0	0	0
163	5.81672	0	0	0	1.58318	0	0	0	5.34369e-05	0	0	0
164	0	0	1.45506	0.000513706	1.26255	0	0.439706	0.774759	0	0.644621	0	0.400672
165	0	1.48964	0.796431	0.000410632	1.03181	0	0	0.821265	0.000123837	0	8.856e-06	0.358663
166	0	0	0	1.05894	0	0	0	0.911715	0	0.639144	0	0.475726
167	0	0.00127848	0.804312	0.525151	0.978381	0.00160381	0.182707	0.561634	0.00143366	0.576781	0.00301495	0.3083
168	0	0.37938	0.152669	0.149947	0	0.179263	0	0.0925368	0	0	0	0
169	0.972731	0.00252457	0.137446	0.0010536	0.213004	0.00122489	0	0	5.06175e-05	0.000118218	0.000735207	0.00108624
170	0	0.000147427	0	0.000299653	0.187828	0.370057	0	0.106446	0	0	0.483023	0.0542347
171	0	0	0.204697	0.000534187	0	0.000191236	0	0.160716	6.21733e-05	0	0.000162487	2.96745e-05
172	0	0.00161599	0	0	0.432208	0	0.674117	0	0.0008685	0	0.00165662	0.000779743
173	0	0	0	0.437163	0	0	0	0	0	0	0	0
174	0	0	2.17602e-05	0	0.484985	0	0	0	3.35166e-05	0	0	0
175	0.00924164	0.000607909	0	0.00460154	0	0	0.741599	0	0	0	0	0
176	1.43095	0	0	0	1.22547e-05	0	0	0.42714	0	0	0.000108628	2.33872e-05
177	0	0.703789	0	0	0	0	0	0.431767	0	0	0	0
178	0	0	0	0	0	0	0	0	0	0	0	0
179	0	0	0	0	0	0	0	0	0	0	0	0
180	0	0	0	0	0	0	0	0	0	0	0	0.150448
181	0	0	0	0	0	0	0	0	0	0	0	0
182	0.0125148	0	0	0.797225	0	0	0.458322	0.773022	0	0.770021	0	0
183	0	0	0	0	0	0	0	0	0	0	0	0
184	0	0	1.36655	0	0	0.0158944	0	0	0	0	0	0.313511
185	0	0	1.74745	0.000918858	0	0	0.495291	0	0	0	0	0.396295
186	0	1.66916	1.17597	0.792985	0.956237	0	0	0.852764	0.0333964	0	0.337707	0.302246
187	1.74882	1.32231	0.984144	0.906869	1.19384	0	0.243834	0.703257	0.0415571	0.678116	0.00170787	0.287386
188	0	0	0.619837	1.16634	0.817882	0.000149152	0.226952	0.573424	0.00163709	0.662732	0.00251561	0.350581
189	0	0.00136346	0	0	0.218411	0	0.462507	0	0.0013216	0	0.00241756	0.0403152
190	0.66857	0.347903	0	0	0	0	0.447682	0	0.000483375	0	0.518536	0.0735316
191	0.665278	0.00138319	0	0.000418086	0.324643	0.000597781	0	0	1.48013e-05	0	0.000365896	0.000581804
192	0	0	3.30721e-05	0	0.599312	0	0	0	4.64546e-05	0	0	0.0840564
193	0	0	8.77532e-06	8.64941e-05	0	0	0	0.314861	0	0	0	0.0931739
194	0	0.60748	0	0	0.526109	0	0	0	5.08798e-05	0	0	0
195	0	0	0	0.000307898	1.11131e-05	3.36816e-05	0	0.341487	0	0	0.000131624	3.67964e-05
196	1.2838	0	0	3.5575e-05	1.23905e-05	0	0	0.401752	0	0	0.00011334	2.56204e-05
197	0	0.69846	0	0	0	0	0	0	0	0	0	0.100074
198	0	0	0	0	0	0	0	0	0	0	0	0
199	0.0014171	6.1138e-05	0.736329	0	0	0	0	0	0	0	0	0
200	0.000519359	0	0	0	1.01566	0	0	0.65049	1.47625e-05	0	0	0
201	0.00246538	0	1.00579	0	0	0	0	0	0	0	0	0.218848
202	0	0	0	0	0	0	0	0	0	0	0	0
203	0.000625573	2.69891e-05	1.49942	0	0	0	0	0	0	0	0	0
204	0	0	0	0	0	0	0	0	0	0	0	0
205	0	0	1.49773	0	1.91204	0	0	0	9.24156e-05	0	0	0.452999
206	0	0	1.51198	0.000387773	1.32991	0	0	1.17506	0.000121882	0	4.57129e-05	0.327834
207	0	2.70221	1.27299	0.00098078	1.29381	0.000450841	0	0.760697	0.000143568	0	0.000476972	0.000354954
208	0	1.45304	0.997605	0.829502	1.3086	0	0	0.772013	0.000115939	0	0.000230293	0.398464
209	0	0.952251	0.666694	0.759352	0.609945	0	0.217089	0.734728	0.00115401	0.453347	0.00135495	0.357297
210	0	0.000721537	0.113611	0.000444078	0.213566	0.000403049	0	0	4.98431e-05	0.000187497	0.000236826	0.000320704
211	0	0	6.54826e-06	5.02622e-05	0	0	0	0.15224	0	0	0	0.0530456
212	0	0	0.236924	0	0	0	0	0	0	0	0.711487	0
213	0	0	4.19894e-06	0.000308612	9.85874e-06	6.00992e-05	0	0.246954	0	0	0.000123854	3.54589e-05
214	0	0	0	0.247395	0	0	0	0	0	0	0	0
215	0	0	0.413998	0.000703303	0	0.0002213	0	0.323793	8.44678e-05	0	0.00022232	3.96996e-05
216	0.00227506	0	0	0.00242542	0	0	0.590725	0.401644	0	0	0	3.58597e-05
217	0	0	0	0.00029268	1.13522e-05	1.57898e-05	0	0.383333	0	0	0.000130094	3.58559e-05
218	0.0137479	0	0	0.0043518	0.679144	0	0.501818	0	0	0	0	0
219	0	0	0	0	0	0	0	0	0	0	0	0
220	0	0	0	0	0	0	0	0	0	0	0	0
221	0	0	0	0	0	0	0	0	0	0	0	0.152424
222	0.0010921	0.000625121	0	0	0	0	0	0.805049	0	0	0	0
223	0	0	0	0	0	0	0	0	0	0	0	0
224	0.00454406	0.000196045	1.47206	0	0	0	0	0	0	0	0	0
225	0	0	0	0	0	0	0	0	0	0	0	0
226	0	1.64442	0.936035	0	1.20989	0	0	0.944758	0	0	0	0
227	0	0.00117285	1.12617	1.1672	1.71931	0.000227878	0	1.25993	7.90353e-06	0	0.000442299	0.000589779
228	3.99432	0	0	0	1.45097	0	0	1.43641	0	0.729467	0	0.366502
229	3.7325	0	0.998634	0.932851	1.10836	0	0.282803	0.946137	0	0.670088	0.647746	0.203234
230	0	0.00101817	0.747844	0.833368	1.00018	0.000654888	0	1.14814	4.249e-05	0.500976	0.000696209	0.00100841
231	0	0.000923265	0.593546	0.000289265	1.05646	0	0.236331	0.987512	0.00054977	0.397865	0.00138864	0.276638
232	0	0	0.226518	0.000214841	0	0.000100429	1.31235e-06	0	5.12088e-05	4.03355e-05	4.78911e-05	0
233	0	0	0	0.178144	0	0	0	0	0	0	0	0
234	0	0.371246	0	0	0	0	0	0	0	0	0	0
235	0	0	0	0	0	0	0	0	0	0	0	0
236	0	0	0	0	0	0	0	0	0	0	0	0
237	0	0	0	0	0	0	0	0	0	0	0	0
238	0	0.611476	0.580631	0	0	0	0	0	6.49542e-05	0	0	0
239	0	0	0	0.446307	0.648125	0	0	0	4.66886e-05	0	0	0
240	0	0	3.36636e-05	0	1.03352	0	0	0	5.2047e-05	0	0	0
241	0	0	0	0.581342	0	0	0	0	0	0	0	0
242	0	0	0	0	0	0	0	0	0	0	0	0
243	0	0	0	0	0	0	0	0	0	0	0	0
244	0.00188796	0.00100599	0	0	0	0	0	0.974316	0	0	0	0
245	0	0	0	0	0	0	0	0	0	0	0	0
246	0	2.29755	0	0	0	0	0	1.08332	0	0.643371	0	0
247	2.90863	0.00550511	1.36601	0.000447976	1.96735	0.00159843	0	0.963859	0	0.529539	0.00120195	0.00209267
248	2.80378	2.35345	1.02401	0	1.7674	1.89519e-05	0	1.23507	0	0.499627	0.000475937	0.257172
249	0	2.41809	1.22677	1.04446	1.88563	0.00167584	0	0.714116	0	0	0.00120859	0.00187981
250	2.75202	0	1.13549	1.29643	0	0	0.185939	1.11168	0	0.651958	0	0.395591
251	0	0.00423962	1.1424	1.01499	1.20985	0.00183646	0	0	0	0	0.00111057	0.00175471
252	0	0	0	9.96703e-05	4.17614e-06	0	0	0.155518	0	0	4.63922e-05	1.25828e-05
253	0	0	0	0	0	0	0	0	0	0	0	0.0392623
254	0	0	0.365106	0.000151449	0	0	0	0.283994	2.31041e-05	0	6.37106e-05	9.74088e-06
255	0	0	0	0	0	0	0	0	0	0	0	0.0385242
256	0	0	0	0	0	0	0	0	0	0	0	0
257	0	0.640071	0	0	0	0	0	0	0	0	0	0
258	0	0.703733	0.72093	0	0	0	0	0	4.34934e-05	0	0	0
259	0	0	3.75806e-05	0	0.838042	0	0	0	5.78847e-05	0	0	0
260	0.00138095	5.95787e-05	0.988221	0	0	0	0	0	0	0	0	0
261	0.00620727	0.000823107	1.52511	0	0	0	0	0.867244	0	0	0	0
262	0	0	0	0	0	0	0	0	0	0	0	0.372994
263	0	0	0	0	0	0	0	0	0	0	0	0
264	0	0	0	0	0	0	0	0	0	1.04822	0	0
265	0.00119801	0.00066491	0	0	0	0	0	0.766671	0	0	0	0
266	0.0140182	2.36285	1.14943	0.00526492	1.5377	0	0.285548	1.26753	0	0	0	0.318359
267	0.00232381	2.40285	1.15672	0.000977627	1.78979	0.00087429	0	1.13222	0	0	0.00115519	0.545293
268	0.00132017	1.84273	1.34584	0.00108623	1.19355	0.00143687	0	0.903115	0	0.61056	0.00110416	0.00199609
269	2.72627	1.42107	1.07567	0.808608	1.24622	0.000670206	0	0.833631	0	0	0.00083051	0.341653
270	0.00424704	0.000287587	0	0.00211788	0	0	0.230505	0.663712	0	0	0	0
271	0	0	2.04288e-05	0	0.316866	0	0	0	3.13702e-05	0	0	0
272	0	0	0	0	0	0	0	0	0	0	0	0
273	0	0	0	0	0	0	0	0	0	0	0.228075	0
274	0	0	0	0	5.48547e-07	0	0	0.492928	0	0	4.3977e-06	0
275	0	0	0	0	0	0	0	0	0	0.339634	0	0
276	0	0	4.72676e-05	0	0.914388	0	0	0	7.27089e-05	0	0	0
277	0	0	0	0.574477	0	0.0250869	0	0.567168	0	0	0	0
278	0	0	0	0	0	0	0	0.746618	0	0	0	0.174299
279	0	1.7081	0	0	0	0	0	0	0	0	0	0
280	0	0	0	0	0	0	0	0	0	0	0	0
281	0	2.17641	0	0	0	0	0	0	0	0	0	0
282	0	0.00622908	0	1.58006	1.89355	0.00258496	0	0	0	0	0.00157644	0.00256
283	0.00773675	0.00390516	1.2359	0	1.06975	0	0	1.11591	0	0.569504	0.000118042	0.479309
284	0.00116548	2.19839	0	0.00308318	1.80951	0.00394174	0	1.01066	0	0.000994055	0.0026138	0.00439664
285	0.00286792	0.00799286	1.0466	1.53074	1.65836	0	0	1.17861	0	0	0.680992	0.624276
286	0.00339041	1.93209	1.15651	0.000965511	1.18929	0	0	1.12545	0.0468666	0	0.00102891	0.354031
287	0	2.51376	1.12675	1.43109	1.30431	0.000652225	0	0.956941	0	0.503919	0.000881794	0.389795
288	0.00185838	0.00780344	1.15625	0.00213586	1.38468	0.00208182	0	1.04306	0	0.543792	0.00176963	0.398647
289	0	0	0	0	0	0	0	0	0	0	0	0
290	0	0	0	0	0	0	0	0	0	0	0	0
291	9.89199e-06	0	0	0	0.614115	0	0	0.556019	5.66042e-05	0	0	0
292	0	0	0	0	0	0	0	0	0	0	0	0
293	0	0	0	0	0	0	0	0	0	0	0	0
294	0	0	0	0	0	0	0	0	0	0	0	0
295	0	0	0	0	2.86351e-06	0	0	0.932457	0	0	2.27707e-05	0
296	0	0	0	0	0	0	0	0	0	0	0	0
297	0.00270892	0	1.20733	0	0	0	0	0	0	0	0	0.439083
298	0	0	0	0	0	0	0	0	0	0	0	0
299	0	0.00680426	0	0.00134522	1.54814	0.00284512	0	0	0	0.804073	0.00174116	0.00260453
300	3.21966	1.1645	0.903257	1.27874	1.01641	0	0.342457	0.581294	0	0.379245	0	0.473597
301	2.99882	0.00907898	1.21636	1.22378	1.30156	0	0.247074	0.849172	0	0	0	0.488007
302	0.000131365	2.41304	0	0	0	0	0	1.259	0	0.992878	0	0
303	5.19548	2.68497	0.855244	1.17616	0	0	0.287558	0.999764	0	0	0	0.501409
304	2.69518	1.9414	0.580666	0.803078	1.35229	0.000944009	0.183644	0.736095	0	0	0.000420475	0.261557
305	0.00604308	1.76676	0.44409	0.00522361	1.0566	0.000702298	0.136645	0.702243	0	0	0.000226817	0.192148
306	0.000210699	0.000180821	0	0	0	0	0	0.491867	0	0	0	0
307	0	0	0	0	0	0	0	0	0	0	0	0
308	0	0.751001	0	0.562714	0	0	0	0	0	0	0	0
309	0	0	0	0	0	0	0	0	0	0	0	0
310	0	0	0	0	6.57855e-06	0	0	0.847259	0	0	5.66475e-05	9.13654e-06
311	0	0	1.15742	0	0	0	0	1.20346	2.01253e-05	0	8.09996e-05	7.14371e-06
312	0.0130858	0.000858088	0.907422	0.00646356	0	0	0.415529	0	0	0.000423047	0	0
313	0	1.98768	0	0	0	0	0	0	0	0	0	0
314	0	0	0	0	0	0	0	0	0	0	0	0
315	0	0.00928969	0	0.00129862	1.72419	0.00320139	0	0.769181	0	1.15096	0.00211246	0.00336281
316	0	0	0	1.24736	0	0	0	1.03161	0	0	0	0.600029
317	0.0138789	2.3893	1.00857	1.02245	1.39836	0	0.28894	0.773546	0	0.569841	0	0.358688
318	0.00410638	2.06407	1.10593	0.00148421	1.1733	0	0	0.848731	0	0	0.710452	0.603014
319	0.0164372	0.0133837	0.917534	0.010493	1.31254	0	0.339106	0.709978	0	0.824919	0	0.330618
320	0.000346167	2.69193	0.932611	0.653777	0	0	0	0.800132	0	0	0	0.303444
321	0.00852087	1.22394	0.808648	0.606569	0.882008	0	0.153323	0.572602	0.00662894	0.41954	0.181972	0.291501
322	0	0	0	0	0	0	0	0	0	0	0	0
323	0	0	0	0	0	0	0	0	0	0	0	0
324	0	0	0	0	0	0	0	0	0	0	0	0.118217
325	0	1.07121	0	0	0	0	0	0	0	0	0	0
326	2.70372	0	1.18098	0	0	0.000132383	0	0	6.8985e-05	0	6.22039e-05	0
327	0	0	0.815774	0	1.83223	0	0	0.820386	0.000105585	0	0	0.234973
328	0	1.7587	1.20076	0	0.701535	0	0	0.875979	4.47109e-05	0.321072	0	0.158815
329	0.00583623	1.06203	0.830435	0.608661	1.07174	0	0.220108	0.834796	0.0180205	0	0.263883	0
330	0.0111715	0.00184406	0.780284	1.32425	1.03007	0	0.459104	0	0	0	0	0.30408
331	0.00261648	0.0089426	0.885566	0.00240986	1.55734	0.00259856	0	0.683979	0	0	0.00199353	0.38773
332	4.96412	2.57933	1.03469	0.688821	0.71545	0	0.197345	0.389208	0	0	0.355582	0.00142098
333	0.00218856	0.00631538	0.606758	0.000972223	0.847006	0	0	0.824738	0	0.638453	0.618982	0.301838
334	0.0104295	1.61496	0.635949	1.23044	0.894776	0	0.248287	0.757664	0	0.501528	0	0.325173
335	0	1.87047	0.84145	1.06449	0.737473	0.000378699	0	0.714367	0.011514	0.796791	0.000810011	0.368798
336	2.99523	0	0.583174	0.645601	0	0	0.147699	0.329188	0	0.619066	0.357804	0.215304
337	0	0	6.38125e-05	0	0.891477	0	0	0	9.79219e-05	0	0	0
338	0	0	0	0.000164171	1.15114e-05	0	0	0.762362	0	0	0.000116812	2.81755e-05
339	0	0	0	0	0	0	0	0.745113	0	0	0	0.160098
340	0.00329237	1.01264	0.831868	0.354807	0	0	0.182847	0.717937	0.00171528	0	0	0
341	0.970493	0.916789	0.750071	0.287163	0.788619	0	0.129348	0.876071	0.00274661	0.269844	0	0.15554
342	1.72276	0.893359	0.778052	0	0.704091	0	0	0.606103	7.06694e-05	0.430974	0	0
343	2.5975	1.35269	0.671858	0.00027703	1.20139	0	0	0.695325	0.0152477	0	0.000548615	0.268615
344	2.82405	1.46977	0	0.836956	0.882914	0	0	0	0	0.470748	0	0.601424
345	0.000923236	2.64212	0.843036	0	0	0	0	0.648644	0	0.477254	0	0
346	2.16318	2.46783	0.44621	0.00175808	0.902248	0.00288001	0	0.636699	0	0.585635	0.00191936	0.00314298
347	0.924009	0	0.726808	0	0.648071	0	0	0	0.000161767	0.240919	0	0
348	0	0.62589	0.674991	0.502252	0.750907	0	0	0	0.000160661	0	0	0
349	0	0.949204	0.870247	0	0	0	0	0	9.47818e-05	0.384586	0	0
350	0	1.02493	0.823021	0.5005	0.390638	0	0	0.595906	0.0018024	0.287944	0	0.106273
351	0.980983	0.911327	0.984325	0.693464	1.03265	0	0	0.838557	0.000153955	0.262756	0	0.156945
352	0.00566668	1.76309	0	0.00173311	1.37556	0	0.30252	0.854847	0	0	0	0.279247
353	0.00229957	0	0.823471	0.941374	0	0	0.250343	0.485237	0.00973301	0.405344	0	0.245395
354	0	0.962395	0.437898	0.00204006	1.09252	0.00206774	0	0.833301	0	0	0.00159205	0.196149
355	0.766675	0	0.403775	0.301152	0.455249	0	0	0.420132	0.000117183	0	0	0.0670551
356	0	0	3.81915e-05	0	0.681636	0	0	0.589509	6.38665e-05	0	0	0.111816
357	1.26668	0.653535	0.686308	0	0.606769	0	0	0.618995	0.000147589	0	0	0.1508
358	0	0.939935	0.765111	0.693841	1.01871	0	0	0.778776	0.000150523	0.237914	0	0.211688
359	0	1.02336	0	0	1.03042	0	0	0.492977	3.79146e-05	0	0	0.183953
360	0.00169151	7.29772e-05	0.191845	0	0	0	0	0	0	0	0	0
361	0	0	0	0	0	0	0	0	0	0	0	0
362	0.000138846	1.72061e-05	0.174408	0	0	0	0	0.0926222	0	0	0	0
363	0.248165	0.00044987	0.0999999	0	0.0812413	0.0213169	0.0980632	0.0777993	0.000749653	0	0.0014757	0.000294538
364	0	0	0.11055	0.172357	0	0	0	0	0.122924	0	0	0.0131453
365	0	0	0.621945	0.000862463	0	0.00024728	0	0.485785	0.000105648	0	0.000279266	4.91823e-05
366	0	0.919208	0.800459	0	0.65957	0	0	0.552874	0.000186168	0.26591	0	0.127384
367	0.843843	0.624206	0.65897	0.426506	0.52292	0	0	0.563971	0	0.215695	0.0734904	0
368	0	0.731028	0	0	0	0	0	0	0	0	0	0
369	0	0.00601978	0	0.29055	0.235057	0.00250955	0	0	0	0.000172545	0.00153498	0.00245432
370	0	0	0	0	0	0	0	0	0	0	0	0
371	0	0	0.153465	0	0	0	0.305127	0	0.00135304	0	0.00189175	0.0628297
372	0	0.00197423	0.109729	0	0.211922	0.00103897	0.203722	0	0.0010189	0	0.0021649	0.000946637
373	0.177052	0.284302	0.107498	0	0.110017	0.00364201	0.0671591	0.0983157	0.128949	0	0.0699532	0.00022784
374	0	0	0	0	0	0	0	0	0	0	0	0.234721
375	0.00120734	0	0	0.47168	0	0.982393	0.588789	0	0	0	0	0.229171
376	0	0	0	0	0	0	0	0	0	0	0	0.213292
377	1.93477	0.00984869	0	0.00330723	0.367652	0.00394015	0	0	0	0	0.00252724	0.186028
378	0.000383516	0	0.226008	0	0	0.304698	0	0.143378	0	0	0	0
379	0	0	0.192761	0.255869	0	0	0	0.167943	8.72388e-06	0	0	0
380	0	0.380356	0	0	0.137071	0	0.18498	0.097769	0.0779161	0	0.00108611	0.000599506
381	0.00119729	0.00583258	0.0736429	0.262977	0.12972	0.882317	0.195563	0	0	0	0	0.145439
382	0.00194541	0.476865	0.0560604	0.177926	0.0770981	1.14588	0.26072	0.0248202	0.0229709	0	0.00872655	0.0958504
383	1.16725	0	0	0.344945	0	0.784296	0.530649	0	0	0	0	0.122469
384	0	0	0	0	0	0	0	0	0	0	0	0
385	0.000721631	1.02697	0.200539	0	0	0	0	0	0	0	0	0
386	0	0	0.215295	0	0	0	0.474889	0	3.44627e-05	0	0	0
387	0	0.656424	0	0	0	0	0	0	0	0	0	0
388	0	0.568131	0	0	0	0	0	0	0	0	0	0
389	0	0	0	0	0	0	0	0	0	0	0	0
390	0.586227	0.185072	0.0778887	0.105355	0.0421113	0.346268	0.278201	0.0235149	0.0106141	0.0705133	0.303462	0.098714
391	0.825466	0.00826453	0.10989	0.00329397	0.184177	1.67145	0.397006	0	0.0378966	0	0.0300538	0.0874395
392	0	0.555986	0	0.00252409	0.1723	0.267777	0.569426	0	0.0102004	0	0.0286986	0.159835
393	1.51001	0	0.106964	0	0	0	0.531095	0	0	0	0.662303	0.216246
394	0	0	0	0	0	0	0	0	0	0	0	0
395	0	0	0.189853	4.38413e-05	0	0	0	0.147559	8.0878e-06	0	2.30117e-05	3.1665e-06
396	0	0	0	0	0	0	0	0	0	0	0	0
397	0	0.480014	0	0.000664515	0.185228	0	0	0	0.0712545	0.000501823	0.383611	0.00101138
398	0.222583	0.183399	0.13514	0	0.169259	0	0.122434	0.0492799	0.15523	0	0.0466534	0.0176561
399	0.659577	0.00197406	0.0903731	0.000515231	0.102714	0.000728295	0	0.0490341	0	0	0.00046969	0.020307
400	0	0	0	0	0	0	0	9.16387e-08	0.125893	0	0	0
401	0	0	0.129377	0.297254	0	0.978934	0	0	0.00465912	0	0.433349	0.218741
402	0	0.800998	0	0.453553	0.331946	0.370889	0.381221	0	0.0522637	0	0.733721	0.157813
403	0	0	0.101029	0	0	0	0.493729	0	0.0459876	0.428969	0	0
404	0	0	0	4.88631e-05	2.50837e-06	0	0	0.126619	0	0	2.6764e-05	6.91008e-06
405	0.00143594	0	0	0.000916915	0	0	0.574992	0.127194	0.0659132	0	0	0
406	0	0	0	0	0	0	0	0	0	0	0	0.038635
407	0	0.603296	0.190838	0	0.226501	0	0.330477	0	0.00164189	0	0.18972	0.0505163
408	0.00159865	0.00624378	0.205991	0.00194193	0.271858	0	0	0.094678	0	0.000685259	0.178516	0.0502552
409	1.78501	0	0	0	0	0	0	0	0	0.4113	0	0
410	0	0.873343	0.174517	0	0	0	0.591813	0	0	0.404128	0.874232	0
411	1.32497	0	0.193464	0	0	0	0	0	0.0718723	0	0	0
412	0	0.00964483	0	0.00350077	0.378049	0.00402336	0	0	0	0.00192509	0.00246225	0.00391722
413	0	0	0	0	0	0	0	0	0	0	0	0
414	0.00216787	0.00590471	0.199963	0.00162973	0.312992	0.001974	0	0.153607	0	4.94075e-05	0.00130832	0.107696
415	0	0.0087886	0	0.349381	0.38754	0.00366413	0	0	0	0.000518835	0.00224137	0.00358073
416	0	0	0.138533	0.000381589	0	0.000138228	0	0.108835	4.42737e-05	0	0.000115624	2.1164e-05
417	0	0	0.101632	0.349327	0	0.797389	0	0.125704	0	0	0	0
418	0.000524054	0.0106035	0	0.00406963	0.382889	0	0.269748	0	0	0.0016463	0.530184	0.00426148
419	0	0.510202	0	0	0	0	0	0	0	0	0	0
420	0	0.325038	0.167934	0	0	0.391629	0.372648	0	0	0	0	0
421	0	0.263225	0	0.266638	0	0	0	0	0	0	0	0
422	0.405165	0.287944	0.232922	0	0.362891	0	0	0	0.44372	0	0	0
423	0.000725246	0.000268587	0	0.208252	0	0	0	0.27455	0	0	0	0
424	1.08571	0.000724458	0.313676	0	0.413716	0	0.486185	0.241509	0.00141324	0	0.00221969	0.000176888
425	0	0	0	0.541272	0	0	0	0.342638	0.486561	0	0	0
426	0	0	0.518359	0	0	0	0.735078	0	0.00266573	0	0.00407545	0
427	0	0	0	0	0	0	0	0	0	0	0	0
428	0.0015841	0.000779409	0	0	0	0	0	0.456032	0	0	0	0

## Sheet: S2
Supplementary Table S2: Ligand Receptor interaction activities on the niche in the PDAC dataset
Ligand- Receptor	Niche1	Niche2	Niche3	Niche4	Niche5	Niche6	Niche7	Niche8	Niche9	Niche10	Niche11	Niche12
LAMB1_ITGAV	0	0	0	0	0	0	0	0	0	0	0.935058	0
COL1A1_ITGA11	0	0	0	0	0	0	0.00341404	0	0	0.838982	0	0
LAMC2_CD151	0	0	0.538352	0.00462624	0	0.00347975	0.000877084	0	0.00826193	0.0033716	0.00240733	0
COL1A2_ITGA11	0.000748408	0	0	0.00569658	0	0	0	0.0018388	0	0.89777	0	0.0134407
FGG_ITGB1	0	0	0	0	0	0	0	0	1.70171	0	0	0
LAMB3_CD151	0.00387431	0.000589084	0.602489	0	0	0	0	0.000113856	0	0	0	0
CXCL12_CXCR4	0	1.85188e-05	0	0	0	0.296521	0.0118954	0	0.0641677	0	0.0503577	0.00258095
LAMB3_ITGA3	0	0	0	0	0.509793	0	0	0	0	0	0	0
LAMC2_ITGA3	0	0	0.000374698	0	0.492023	0	0	0	0.00257324	0	0	0
FN1_ITGA3	0	0.0128483	0	0.0137874	0.471957	0.0242457	0	0	0	0.0289319	0.0216534	0.0988844
CXCL12_CD4	0	0	0	0	0	0.721589	0	0.000315236	0	0	0	0
LAMB3_ITGB4	0.00158726	0.00323029	0	0	0	0	0	0.710286	0	0	0	0
LAMC2_ITGB4	0	0	0.000603703	0.0057793	0.000469909	0.00372962	0.00337166	0.674434	0	0.00139838	0.00430856	0.00393478
A2M_LRP1	0	0	0	0	0	0.0172329	1.08196	0	0.0680294	0	0.0325381	0
MDK_LRP1	0.00294146	0.000909374	0	0.0200888	0	0	0.967492	0.00414516	0	0.0144694	0	0
THBS2_NOTCH3	0	0	0	0	0	0	0	0	0	0	0	1.60861
FN1_ITGA5	0	0	0	0.633051	0	0	0	0	0.00177181	0	0	0
FN1_IL17RC	0.171761	0	0	0	0	0	0	0	0.000680075	0	0	0
FN1_PLAUR	0	0.37003	0	0	0	0	0	0	0.00111577	0	0	0

## Sheet: S3
Supplementary Table S3: Estimations of cell type-specific gene module proportions in the PDAC dataset
index	Acinar_cells	Cancer_clone_A	Cancer_clone_B	Ductal_APOL1_high-hypoxic	Ductal_CRISP3_high-centroacinar_like	Ductal_MHC_Class_II	Ductal_terminal_ductal_like	Endocrine_cells	Endothelial_cells	Fibroblasts	Macrophages_A	Macrophages_B	Mast_cells	Monocytes	RBCs	T_cells_&_NK_cells	Tuft_cells	mDCs_A	mDCs_B	pDCs
0	0.00951604	0.00268888	0.0021273	0.0027199	0.093116	0.00575235	0.00455131	0.0254579	0.207167	0.225349	0.0656057	0.0527429	0.00823637	0.0388823	0.00282781	0.0499717	0.00415001	0.0386975	0.127933	0.0325073
1	0.00014303	0.0146556	0.00625646	0.050117	0.426403	0.109586	0.15599	0.0421074	0.00287189	0.00281455	0.0159343	0.0114892	0.00748487	0.00656978	0.0373876	0.0186812	0.0201485	0.0196995	0.0319263	0.0197348
2	0.0063045	0.0197915	0.0193934	0.0341475	0.396482	0.0678932	0.131238	0.0460812	0.0270494	0.01847	0.0192006	0.0259632	0.0344153	0.0204344	0.0358553	0.0172961	0.01808	0.0129556	0.0156963	0.0332523
3	0.0319497	0.0199442	0.0199459	0.0339565	0.37534	0.0461196	0.121877	0.0390176	0.0200546	0.0108874	0.0303225	0.0405859	0.0220251	0.0315447	0.0245734	0.0206418	0.013527	0.030342	0.0343033	0.0330415
4	0.0134581	0.0124476	0.0144966	0.0254627	0.39597	0.0512937	0.145858	0.0436457	0.00961981	0.00890523	0.0196669	0.0282181	0.0521581	0.019008	0.0158787	0.0263861	0.0175004	0.0297659	0.0267803	0.04348
5	0.0129521	0.031059	0.0268741	0.0190831	0.433397	0.0541048	0.161828	0.0578652	0.00769148	0.0098392	0.00637057	0.00687397	0.0588018	0.0143842	0.0164987	0.00632739	0.0157778	0.0105536	0.0219012	0.0278167
6	0.000148265	0.00527619	0.00369609	0.0167671	0.55171	0.0863375	0.136491	0.0156306	0.00965031	0.00353441	0.00171004	0.0165374	0.0330297	0.00425189	0.00274419	0.0259808	0.00479727	0.0204243	0.0125239	0.0487593
7	0.00472714	0.0131851	0.00271507	0.061339	0.588932	0.133285	0.153711	0.00695229	0.0011083	0.000939305	0.00640602	0.00532718	0.00122656	0.00330448	0.00299374	0.00263341	0.00214154	0.00189291	0.00267098	0.00450955
8	0.00415494	0.00415695	0.00548332	0.066671	0.430591	0.165291	0.00644596	0.0280509	0.0396407	0.00480904	0.0117	0.00903432	0.0369874	0.085674	0.00935217	0.00643894	0.006646	0.00716307	0.0615597	0.0101494
9	0.00858048	0.0102911	0.0139717	0.0824872	0.421459	0.1673	0.0132939	0.027465	0.0356061	0.0389962	0.00453806	0.00633687	0.0763497	0.0258141	0.0113031	0.0048754	0.00752189	0.00787982	0.0302562	0.00567333
10	0.00549397	0.0108012	0.0239658	0.0645755	0.475257	0.198007	0.0215419	0.0123055	0.00533267	0.0239039	0.0312126	0.0236672	0.00437329	0.0261811	0.00563045	0.00740618	0.0155924	0.00903929	0.0230943	0.0126186
11	0.0213754	0.0165338	0.01299	0.0443983	0.491674	0.198883	0.0429738	0.01399	0.00611507	0.00552833	0.007216	0.0099512	0.02691	0.0118881	0.0128085	0.00745481	0.0170986	0.0116491	0.0298262	0.0107356
12	0.00982136	0.0115128	0.00861139	0.0304009	0.47862	0.19115	0.0426752	0.0304082	0.0070804	0.00382237	0.00592875	0.00899132	0.00898388	0.0305451	0.0186153	0.0212362	0.0170017	0.0242904	0.0296474	0.0206573
13	0.00587443	0.0365791	0.036011	0.0260226	0.346084	0.153283	0.034707	0.0173819	0.029575	0.0446122	0.0270331	0.0199123	0.0213939	0.0191078	0.0457033	0.0281227	0.0277566	0.0225063	0.0302263	0.0281075
14	0.0176089	0.0487594	0.0758676	0.0276353	0.292075	0.140039	0.065595	0.0110422	0.0226273	0.0409068	0.0211848	0.0340561	0.0113265	0.0135112	0.0641182	0.0300955	0.0210598	0.02111	0.0165272	0.0248548
15	0.0293986	0.0630617	0.0970776	0.037304	0.230274	0.118105	0.0671672	0.0391259	0.0333212	0.035261	0.00800912	0.0202769	0.0181725	0.0154884	0.0627381	0.0313448	0.0505945	0.01293	0.00775155	0.0225977
16	0.0565737	0.0956201	0.16304	0.0336183	0.142999	0.0756533	0.0405359	0.0269435	0.035021	0.0459079	0.0141482	0.0213258	0.0146241	0.027729	0.0702355	0.0265272	0.0378914	0.0226834	0.0253025	0.0236194
17	0.0211752	0.137821	0.227103	0.0471048	0.0702789	0.0511919	0.0447531	0.0225186	0.0635957	0.0412005	0.0144146	0.0189001	0.00823255	0.0190568	0.0669689	0.0226131	0.039486	0.0246786	0.0322328	0.0266738
18	0.00349666	0.000924085	0.00105678	0.00126083	0.14667	0.00906085	0.00791573	0.0108386	0.181703	0.183353	0.00623148	0.0106248	0.0162835	0.0660828	0.0235927	0.11162	0.00485098	0.0658399	0.0737845	0.0748092
19	0.0310561	0.0329275	0.0255431	0.0429205	0.317302	0.0742394	0.112933	0.038805	0.0210464	0.0406599	0.0303259	0.0129421	0.00628685	0.0154022	0.056257	0.0160902	0.0156294	0.0235239	0.0526554	0.0334537
20	0.0320547	0.0271531	0.0329266	0.0392541	0.311104	0.0576119	0.112302	0.0701148	0.03854	0.0308909	0.00589232	0.0108025	0.00876324	0.0244508	0.0496308	0.0441827	0.0326145	0.0158814	0.0100828	0.045747
21	0.0249901	0.027512	0.0323302	0.0248309	0.311622	0.0449739	0.109232	0.0623688	0.0371562	0.0326338	0.0148574	0.0321908	0.00878946	0.0389972	0.0393462	0.0501277	0.0341107	0.0248599	0.0140032	0.0350673
22	0.0306597	0.0248499	0.03102	0.0256857	0.356391	0.060916	0.132788	0.0504734	0.0134511	0.0152822	0.00726833	0.0154816	0.0191858	0.0213625	0.0610342	0.0282359	0.0252098	0.0231758	0.0170451	0.0404838
23	0.0226929	0.0337897	0.0252463	0.0149782	0.387455	0.0514447	0.135183	0.0688448	0.00635292	0.00581328	0.0281758	0.0128526	0.00766351	0.0188943	0.0438581	0.0267098	0.0336518	0.0133764	0.0180462	0.0449713
24	0.00456206	0.0270017	0.0085693	0.0388483	0.570433	0.118119	0.178371	0.00593238	0.00164879	0.00158959	0.00375689	0.00313359	0.00123944	0.00250385	0.00514142	0.00447038	0.00937725	0.00336238	0.00450509	0.00743414
25	0.00445269	0.00347688	0.00303236	0.0256181	0.541185	0.13447	0.0805368	0.0145161	0.00196796	0.00181119	0.00324353	0.00838495	0.0187303	0.0335329	0.004534	0.00885922	0.012636	0.0157027	0.0269447	0.0563643
26	0.0020135	0.00580584	0.00572903	0.00983601	0.477892	0.12196	0.0339389	0.00904817	0.0188391	0.00493608	0.016318	0.00703816	0.00366457	0.0481222	0.0116502	0.0146892	0.0177415	0.0486977	0.0789471	0.0631326
27	0.00817996	0.00943991	0.0064642	0.0417009	0.47034	0.154556	0.040485	0.0149631	0.00676274	0.00414518	0.00822793	0.00917423	0.0235238	0.0452344	0.0225094	0.0130198	0.0212825	0.0176271	0.0620247	0.0203398
28	0.0363293	0.0230951	0.0277298	0.0661837	0.413605	0.151151	0.0197888	0.0128399	0.0271009	0.0114069	0.0137881	0.00858878	0.0163746	0.0186437	0.0210251	0.0213738	0.013116	0.0182279	0.0509058	0.0287257
29	0.012872	0.0261576	0.0324285	0.0774922	0.409705	0.164755	0.0284956	0.0224618	0.0146156	0.0100017	0.0141722	0.00975043	0.0185597	0.0367848	0.044066	0.00842809	0.0268057	0.0111655	0.0178742	0.0134091
30	0.0361056	0.0307894	0.0393707	0.0582806	0.409194	0.160629	0.0191884	0.0213123	0.00703915	0.00808331	0.0123671	0.0105062	0.00770554	0.0422599	0.0394818	0.0131918	0.0411377	0.0124773	0.0158344	0.0150463
31	0.0128748	0.0110259	0.0158161	0.0415724	0.420087	0.172695	0.0381521	0.029346	0.007715	0.0134635	0.0116822	0.011569	0.00811972	0.0440648	0.0325488	0.013764	0.0555049	0.0151823	0.0277331	0.0170832
32	0.0122435	0.0112332	0.0190527	0.0454126	0.411173	0.181542	0.0548696	0.0205276	0.00868864	0.00471399	0.00659055	0.00866988	0.00392914	0.037348	0.0391119	0.0149931	0.0351837	0.0265587	0.0309305	0.0272277
33	0.0103015	0.0645862	0.065275	0.0352888	0.342921	0.15518	0.04846	0.0126476	0.00944809	0.0281109	0.0119248	0.016836	0.0396276	0.022059	0.050712	0.00860526	0.0244214	0.0184831	0.0196715	0.0154399
34	0.0270754	0.0931102	0.103834	0.0358937	0.276415	0.121786	0.0659033	0.0156842	0.0154326	0.0308575	0.016467	0.012719	0.00567662	0.00881977	0.0567676	0.0145383	0.0271118	0.0252046	0.0268356	0.0198677
35	0.0465386	0.0867035	0.113509	0.0372278	0.214565	0.100136	0.0600684	0.017836	0.0178526	0.0621523	0.0283715	0.0137691	0.00357335	0.0139737	0.0631198	0.0146754	0.04808	0.0102897	0.0306896	0.0168685
36	0.0504703	0.119225	0.175514	0.0419615	0.145114	0.0796139	0.0510059	0.0209647	0.0299884	0.055589	0.0122179	0.00988252	0.00422366	0.0108262	0.0679561	0.0219861	0.0573905	0.0140033	0.0140735	0.0179938
37	0.0123719	0.157302	0.239711	0.0316047	0.0196919	0.0161515	0.00983906	0.014486	0.0870341	0.0729936	0.0328001	0.0282919	0.00388844	0.0430898	0.0537494	0.0457078	0.037811	0.0277398	0.0261825	0.0395536
38	0.0130298	0.243676	0.319522	0.029591	0.0073807	0.0111358	0.0335887	0.00531236	0.0451254	0.0513756	0.0485308	0.0266725	0.0145998	0.0151263	0.0223287	0.0203895	0.0138836	0.0250406	0.0349504	0.0187398
39	0.089115	0.0140332	0.0177169	0.0161162	0.201834	0.0440499	0.0688219	0.0624784	0.0475024	0.0995245	0.0431766	0.0260887	0.00805072	0.0165298	0.0518655	0.0350253	0.027731	0.0203121	0.0583162	0.0517122
40	0.0894786	0.0160818	0.0235207	0.02127	0.21697	0.0400052	0.0637224	0.0802858	0.0646221	0.0788047	0.00869644	0.0174843	0.0128603	0.0144188	0.0610447	0.0631831	0.0346795	0.0151198	0.0186911	0.0590611
41	0.086901	0.0159241	0.0177579	0.00909246	0.234402	0.0388903	0.0730751	0.073199	0.0489275	0.0739238	0.0175337	0.0297521	0.00807888	0.0282985	0.0391873	0.0503333	0.0356742	0.0310858	0.0340685	0.0538945
42	0.101409	0.0286753	0.0289959	0.0180309	0.290893	0.0546669	0.0908363	0.062599	0.0268572	0.038087	0.00996043	0.0124511	0.0109545	0.0185745	0.057166	0.0255854	0.0496217	0.0146914	0.0173227	0.0426225
43	0.0256554	0.0465964	0.0450291	0.0284782	0.330604	0.0563298	0.105437	0.0867271	0.0377969	0.0122449	0.0179286	0.00791668	0.0032859	0.00657387	0.0701205	0.0217169	0.0484219	0.00598481	0.00640823	0.0367431
44	0.00858365	0.0233746	0.0291068	0.0164395	0.520796	0.119817	0.163313	0.0111316	0.00403722	0.00286976	0.0015022	0.00284405	0.0120157	0.0203179	0.00766746	0.015835	0.0154189	0.00463218	0.00235779	0.017939
45	0.00636699	0.00320965	0.00527528	0.0236148	0.540022	0.142056	0.132076	0.01387	0.00337652	0.00214159	0.00237072	0.00251338	0.00221409	0.00232553	0.0121221	0.00450268	0.045305	0.0110448	0.01256	0.0330327
46	0.00643222	0.00483104	0.00223994	0.0067895	0.56216	0.158908	0.106413	0.00454859	0.00126767	0.00103695	0.0018441	0.00243958	0.000840306	0.0492219	0.00717442	0.00376608	0.0292997	0.00750513	0.00546117	0.0378206
47	0.0202174	0.0127385	0.0073088	0.0108156	0.486706	0.148627	0.0638464	0.0111927	0.00606653	0.00536517	0.00984374	0.015263	0.00449497	0.0352665	0.0300863	0.0145629	0.0355434	0.0276265	0.0177014	0.036727
48	0.0131891	0.0379671	0.0293542	0.0327939	0.41402	0.140523	0.0438722	0.0130896	0.0237615	0.0203081	0.0209528	0.0116863	0.0249037	0.0241589	0.0309616	0.0126589	0.0194728	0.0294	0.0298999	0.027027
49	0.0245917	0.0527833	0.0593589	0.0679705	0.372763	0.141375	0.0324087	0.0165366	0.0354451	0.0245382	0.0153045	0.0093277	0.0179052	0.0106989	0.0393146	0.0160476	0.0171743	0.0143784	0.0200554	0.0120225
50	0.022337	0.0452521	0.0465082	0.0556351	0.34823	0.125659	0.0226548	0.0373244	0.0244026	0.0218001	0.0222342	0.0133654	0.00585685	0.0240007	0.0527338	0.0206149	0.033558	0.0182005	0.0330137	0.026619
51	0.0232771	0.0482271	0.039346	0.0461291	0.322248	0.123833	0.0170912	0.0412267	0.00827507	0.0127242	0.0301768	0.0103495	0.0104855	0.0367671	0.073572	0.029909	0.0681472	0.0192726	0.0192267	0.0197159
52	0.0251928	0.043404	0.0499849	0.0497771	0.330208	0.13558	0.0337223	0.0145932	0.00761864	0.00675413	0.0130317	0.00839568	0.00759145	0.0112576	0.0639755	0.035636	0.0486075	0.0358498	0.0441547	0.0346651
53	0.0279502	0.0650713	0.0605043	0.0490807	0.316096	0.137057	0.0485252	0.0142502	0.0138637	0.0273275	0.01054	0.0049225	0.0162125	0.00934279	0.0766171	0.0201835	0.0411599	0.0253427	0.0203854	0.0155682
54	0.0471622	0.126022	0.119924	0.0489953	0.234037	0.0996741	0.0427581	0.0127869	0.019468	0.0473143	0.00620608	0.00633066	0.00695661	0.00819939	0.0706033	0.0245207	0.0406507	0.014989	0.00785364	0.0155487
55	0.0814194	0.155745	0.14115	0.0339177	0.173991	0.0681462	0.0325404	0.0189911	0.0373433	0.0348311	0.00641999	0.0103477	0.0157342	0.012227	0.0841688	0.0215265	0.035343	0.0117109	0.00741638	0.0170296
56	0.0805227	0.153441	0.159259	0.0334278	0.148321	0.0612296	0.0412114	0.0210671	0.0283404	0.0396562	0.0124998	0.0189397	0.00933698	0.0180371	0.0841975	0.0170084	0.0357508	0.0116969	0.0118503	0.0142064
57	0.0259711	0.129776	0.165647	0.0215864	0.102882	0.0405649	0.0225178	0.0305221	0.0776339	0.110724	0.0218341	0.0183284	0.0135918	0.0208831	0.0876576	0.0249165	0.0363319	0.0144162	0.016056	0.0181586
58	0.0101402	0.109931	0.17739	0.00752365	0.0162407	0.00702994	0.0045909	0.00790455	0.138514	0.164202	0.0429833	0.0565028	0.034689	0.0548369	0.0589894	0.0339611	0.0170377	0.016962	0.0206853	0.0198852
59	0.00596419	0.130885	0.220636	0.00259664	0.00772953	0.00367892	0.00453872	0.00506473	0.134424	0.169607	0.0526875	0.0362684	0.0783784	0.04671	0.0442616	0.0332308	0.0063261	0.00281613	0.00560172	0.00859401
60	0.204333	0.00340624	0.00310254	0.00203022	0.0725821	0.0040545	0.0048713	0.086724	0.0656946	0.116284	0.0805948	0.0382476	0.00205226	0.036117	0.0122206	0.0608311	0.0148777	0.0260558	0.0846318	0.0812883
61	0.0823133	0.00111991	0.00103342	0.00119012	0.103278	0.00579135	0.00272733	0.107699	0.0856079	0.116807	0.0802143	0.0225371	0.0170786	0.0105042	0.03523	0.0590563	0.0215088	0.0360578	0.109552	0.100694
62	0.22562	0.00359552	0.0036748	0.00477636	0.14524	0.0113275	0.00821863	0.0787565	0.0872591	0.0863283	0.036777	0.0114682	0.0128342	0.00423663	0.0273334	0.040644	0.0316489	0.0328482	0.0772003	0.0702124
63	0.330786	0.00417054	0.00275282	0.00193717	0.18564	0.00430873	0.00339542	0.0563736	0.0673339	0.0752345	0.00211766	0.00799995	0.0381598	0.00314182	0.0174131	0.045035	0.0569617	0.010398	0.00435758	0.0824818
64	0.309706	0.0224766	0.00466045	0.00341457	0.269957	0.0134916	0.0125953	0.0488135	0.059439	0.0197589	0.0207757	0.0121516	0.00676669	0.0152401	0.0296543	0.0239077	0.052498	0.00678216	0.0151508	0.0527598
65	0.0213611	0.0250609	0.0266207	0.0184418	0.468126	0.102852	0.119947	0.0131353	0.00452117	0.0114549	0.00894	0.00536077	0.00725671	0.00914162	0.0179735	0.0122888	0.046429	0.0189607	0.0288088	0.0333197
66	0.0151443	0.0319641	0.0176685	0.0196859	0.476343	0.117486	0.116061	0.0266172	0.00493548	0.00854062	0.0116473	0.0105394	0.00434327	0.00933952	0.025761	0.00806668	0.0430248	0.0125567	0.0206295	0.0196459
67	0.0275083	0.0218838	0.00843112	0.0131733	0.484454	0.129069	0.102138	0.0260267	0.00557413	0.0202581	0.0165469	0.00671839	0.00495868	0.0118027	0.0327654	0.00559376	0.0462855	0.0105496	0.0123596	0.0139018
68	0.011147	0.0307855	0.0186148	0.0204724	0.439501	0.129031	0.0785078	0.0392867	0.00798051	0.0219691	0.0137402	0.007853	0.0427663	0.00688444	0.0276006	0.0103223	0.0350695	0.0273501	0.0185881	0.0125302
69	0.00764814	0.0864465	0.0716664	0.0351208	0.341724	0.101942	0.0501561	0.0428389	0.034269	0.0489115	0.00388642	0.00961093	0.00507846	0.0105041	0.037956	0.0519791	0.0223114	0.0109786	0.00489188	0.0220794
70	0.049486	0.0430866	0.0435942	0.0359653	0.289112	0.089924	0.0227132	0.0523765	0.0400999	0.0482814	0.019139	0.024256	0.00562667	0.0129245	0.0566782	0.0402344	0.0300863	0.0266903	0.0440345	0.0256907
71	0.0451175	0.0316608	0.0480345	0.0417465	0.276251	0.0991569	0.0216953	0.0604823	0.016216	0.0140553	0.0335185	0.0263234	0.0103578	0.0238422	0.0908129	0.0271751	0.0405434	0.0211177	0.0445478	0.0273449
72	0.0285706	0.0624863	0.0639461	0.0495417	0.241071	0.0884292	0.0244404	0.0530369	0.0298452	0.0193134	0.0341586	0.0172471	0.0155157	0.0251822	0.0918952	0.035682	0.0442278	0.0262429	0.0282304	0.0209372
73	0.0430838	0.10225	0.092898	0.0616361	0.214855	0.0820594	0.0211319	0.0301341	0.0112649	0.027526	0.0278986	0.019352	0.014419	0.0194855	0.0785998	0.0355191	0.0376817	0.0244901	0.0327197	0.0229957
74	0.0185929	0.16505	0.123934	0.061506	0.191521	0.0717933	0.0319861	0.0241375	0.0128656	0.0265064	0.0118968	0.0150693	0.017854	0.0177578	0.082211	0.0254575	0.0355403	0.0209241	0.0292241	0.0161724
75	0.0416271	0.235102	0.186051	0.0520396	0.13016	0.0413276	0.0220408	0.0230765	0.0154737	0.0104204	0.0117362	0.0145649	0.0129346	0.0111638	0.0896147	0.0191327	0.0297262	0.017707	0.0249947	0.011106
76	0.0244578	0.27866	0.21989	0.043539	0.0770355	0.0244516	0.027211	0.0151583	0.0242586	0.033763	0.0101224	0.015012	0.0340157	0.015693	0.0919629	0.0153197	0.0228914	0.00807734	0.0087105	0.00976944
77	0.00560677	0.304264	0.252865	0.0433106	0.0622449	0.0304503	0.0337077	0.0141224	0.0155531	0.0410455	0.00649583	0.00423921	0.00249832	0.0247308	0.0850087	0.0324726	0.0255306	0.00326669	0.00365225	0.00893397
78	0.0187658	0.221559	0.215642	0.0216349	0.0796522	0.0273167	0.0269252	0.016753	0.0564824	0.0947713	0.0205733	0.0268269	0.00311273	0.0266638	0.0684238	0.0210694	0.021596	0.00746292	0.0149894	0.00977899
79	0.0125734	0.185784	0.197277	0.00996383	0.043434	0.0176743	0.013932	0.0115315	0.0907928	0.136791	0.0167449	0.0353331	0.0600668	0.0310568	0.0706452	0.031169	0.0138257	0.00581336	0.00585304	0.0097387
80	0.0168086	0.0999914	0.133732	0.00201038	0.0171098	0.00381348	0.00372487	0.0211458	0.121496	0.200333	0.0739078	0.0446494	0.0710021	0.0505655	0.0654041	0.0325579	0.00738227	0.00646467	0.0173855	0.0105142
81	0.242706	0.00171948	0.00125458	0.00204381	0.0283666	0.00515156	0.00176315	0.0584085	0.0770127	0.0874099	0.0971835	0.069885	0.00069896	0.0173293	0.00318433	0.0307509	0.0369168	0.0220547	0.130875	0.0852854
82	0.199463	0.00352148	0.00343571	0.00446776	0.0962492	0.0129022	0.00306349	0.0729561	0.0985646	0.080433	0.0714764	0.0292227	0.000904863	0.00376562	0.00427932	0.0300641	0.0467382	0.0275712	0.106495	0.104426
83	0.290719	0.00306029	0.00160875	0.0019394	0.132202	0.00442406	0.00160991	0.0786684	0.0459579	0.0590821	0.0296435	0.0200868	0.0471951	0.00868754	0.00301055	0.0237659	0.0684674	0.0182631	0.0685571	0.0930518
84	0.345038	0.00136449	0.00105473	0.00119895	0.20831	0.00376777	0.0013005	0.0684818	0.0751113	0.00903477	0.00427619	0.0103027	0.0149891	0.00375074	0.0042368	0.015366	0.0691801	0.0205891	0.0400798	0.102567
85	0.108151	0.00190765	0.00122583	0.00251927	0.307676	0.023961	0.00267994	0.075607	0.0630762	0.0293277	0.0188151	0.0295872	0.0553176	0.0182515	0.00509634	0.0162528	0.0697401	0.0281923	0.047445	0.0951707
86	0.0530187	0.00518881	0.00338677	0.00260641	0.372207	0.0583421	0.0114413	0.0674528	0.053657	0.0245393	0.00635854	0.00592085	0.00127807	0.00551366	0.0313344	0.0171791	0.108502	0.0414664	0.035312	0.0952948
87	0.0162678	0.0374003	0.0320106	0.0182853	0.385211	0.0662283	0.060001	0.0453638	0.0156535	0.0239113	0.00970869	0.0132514	0.00561205	0.00834646	0.0609259	0.0302786	0.0733238	0.0320782	0.0148776	0.0512647
88	0.0620464	0.0370567	0.02251	0.0259983	0.397341	0.0889952	0.0937685	0.0260381	0.0080154	0.00689088	0.0254097	0.015256	0.00904932	0.0121158	0.0624062	0.00731141	0.0411454	0.0184049	0.0221804	0.0180603
89	0.0145429	0.0376255	0.0187528	0.0210227	0.389606	0.092226	0.086236	0.025677	0.0136702	0.00699652	0.0290107	0.0161155	0.0407209	0.00932217	0.0614174	0.0174031	0.0463901	0.0207006	0.0238494	0.0287148
90	0.0296842	0.055119	0.0494	0.022305	0.37419	0.105889	0.0751883	0.0333934	0.0130297	0.0190637	0.01168	0.0114404	0.00802057	0.0112291	0.0660658	0.0217915	0.0379363	0.0188253	0.0167438	0.0190045
91	0.0242972	0.0362129	0.0320541	0.0132461	0.297643	0.0821821	0.0458336	0.047406	0.0375604	0.0985455	0.0180773	0.0131563	0.00620333	0.0158912	0.0626212	0.0607788	0.0243545	0.0224308	0.0324427	0.0290628
92	0.0694105	0.0253859	0.0359155	0.0301695	0.247091	0.0696292	0.0330885	0.039796	0.0217136	0.0534709	0.03541	0.0270003	0.00842385	0.0153768	0.0705552	0.0533875	0.0274793	0.0444016	0.0631061	0.0291884
93	0.183873	0.0178459	0.0316408	0.0204082	0.207051	0.06328	0.018492	0.0578206	0.0387262	0.039069	0.0227108	0.0147726	0.00717103	0.0175624	0.110468	0.0300246	0.0489838	0.0149883	0.0374142	0.017697
94	0.0842641	0.0813519	0.0819748	0.0434576	0.189416	0.0664493	0.0230608	0.0697809	0.0308942	0.0227564	0.0149645	0.0127291	0.0104118	0.013172	0.112834	0.0347696	0.0523588	0.0135888	0.0167559	0.0250096
95	0.0481066	0.142638	0.12827	0.0681199	0.146479	0.0547193	0.0149407	0.029441	0.0213692	0.051745	0.016663	0.0273348	0.0263417	0.019756	0.0933958	0.0266017	0.0301089	0.0121323	0.0175316	0.0243047
96	0.00770889	0.268804	0.21204	0.110077	0.0968161	0.0397189	0.0180834	0.0111916	0.0182232	0.0265899	0.00253589	0.00823194	0.00222063	0.0289194	0.0736231	0.0397392	0.0211537	0.00559907	0.00225281	0.00647073
97	0.00273627	0.374699	0.305483	0.116336	0.0368714	0.00963855	0.00500792	0.00782907	0.000559568	0.00355065	0.00245255	0.00088463	0.000231008	0.00660718	0.104506	0.0070692	0.0117934	0.000745993	0.00101504	0.00198374
98	0.027831	0.389826	0.311831	0.0753167	0.0250836	0.0132149	0.0121532	0.00451617	0.0037593	0.0113931	0.0034309	0.00335752	0.00211039	0.0106862	0.0856837	0.00459328	0.00606594	0.00240468	0.00290444	0.00383812
99	0.0109112	0.405673	0.318371	0.0484013	0.0255395	0.0172592	0.0197351	0.00475284	0.00311085	0.0397829	0.00275495	0.0021078	0.00068719	0.0220603	0.0613215	0.0021106	0.00672559	0.00236621	0.00272996	0.00359936
100	0.0443698	0.34809	0.271668	0.0190091	0.0330087	0.0101122	0.0187583	0.00977393	0.0124942	0.0781143	0.0103872	0.00432038	0.00256798	0.00826485	0.0584055	0.0190057	0.0125018	0.00847939	0.014951	0.0157178
101	0.0139444	0.300044	0.240648	0.0148319	0.0138482	0.00873825	0.0180217	0.017687	0.0391785	0.134254	0.017913	0.00420486	0.00542332	0.0149798	0.0667347	0.0236068	0.0240234	0.00675136	0.0159901	0.0191773
102	0.0277736	0.231145	0.20354	0.0197236	0.0181949	0.0149255	0.0132293	0.00949311	0.068479	0.145717	0.0537332	0.0114197	0.0180262	0.0208153	0.0634171	0.015903	0.0182415	0.00861119	0.0251505	0.0124613
103	0.168387	0.00209383	0.0033288	0.00396789	0.089156	0.0124528	0.00332907	0.0518953	0.079212	0.0678941	0.0552348	0.0524886	0.0440865	0.011024	0.00442462	0.0220349	0.0328157	0.0537698	0.124986	0.117419
104	0.19925	0.00774083	0.00289647	0.00327741	0.141949	0.0110967	0.00255908	0.0780267	0.0960078	0.0421507	0.0565274	0.0161915	0.017418	0.00332456	0.00824433	0.0243862	0.0566219	0.0270203	0.0884892	0.116821
105	0.0946953	0.00152251	0.00117428	0.00491329	0.274257	0.0651531	0.00337343	0.0733373	0.0651212	0.0340675	0.00988349	0.0140448	0.0193497	0.0233773	0.0032945	0.0247332	0.107355	0.0185253	0.0625543	0.0992676
106	0.0712602	0.00173402	0.00144823	0.00615281	0.311869	0.0696718	0.0105691	0.0616204	0.0824276	0.0192612	0.00224352	0.0106855	0.0291163	0.0189042	0.00408559	0.0251311	0.109486	0.0230134	0.0294777	0.111843
107	0.286396	0.00176423	0.00116458	0.00202009	0.238371	0.0203482	0.00196759	0.052667	0.0502503	0.0274918	0.0367321	0.0224624	0.010316	0.00452077	0.00337524	0.00877303	0.044045	0.0307487	0.0805984	0.0759883
108	0.20492	0.00329418	0.00473581	0.00408881	0.267164	0.0358855	0.0106176	0.0597911	0.0597069	0.05062	0.0285128	0.00845861	0.0181712	0.00240938	0.0240537	0.0182101	0.0623381	0.0245904	0.0397769	0.0726554
109	0.0430475	0.0420831	0.0344412	0.0196694	0.305383	0.0546602	0.060234	0.0441601	0.0422214	0.0633393	0.00999162	0.00998761	0.00638878	0.0127503	0.0645171	0.018637	0.0604655	0.0297745	0.0213123	0.0569361
110	0.0812536	0.0431096	0.0437222	0.0367952	0.322769	0.0748483	0.0849099	0.0346758	0.0190396	0.0297923	0.0263543	0.0109492	0.00610373	0.0105977	0.0844549	0.0102667	0.0418821	0.00971754	0.009508	0.0192499
111	0.0364039	0.0614497	0.041286	0.0292699	0.327375	0.0701631	0.0796656	0.0247911	0.0326146	0.0248905	0.0168611	0.0120684	0.0194802	0.0150975	0.110436	0.0187601	0.0381852	0.0123751	0.00763852	0.0211884
112	0.0605356	0.0659931	0.0546715	0.0316162	0.313614	0.0812233	0.0786584	0.0307094	0.0153499	0.0205586	0.0169137	0.0169942	0.00704487	0.00848973	0.0949241	0.0219438	0.0255234	0.0212708	0.0182215	0.0157439
113	0.0694	0.058471	0.0554515	0.0302388	0.265923	0.0722868	0.0556794	0.0329314	0.0361276	0.0572965	0.00715298	0.0127933	0.00497371	0.0267171	0.0997598	0.0488429	0.0322414	0.0105139	0.0104684	0.0127308
114	0.14169	0.0397899	0.0544994	0.0251089	0.209579	0.059916	0.0331434	0.0503787	0.0203475	0.0220947	0.0366372	0.0126	0.00728639	0.0113714	0.101511	0.0441729	0.0508794	0.0172928	0.0433097	0.0183919
115	0.149046	0.0331197	0.0523218	0.0227275	0.186613	0.0595129	0.0157891	0.0637307	0.0330102	0.0372136	0.037397	0.0307939	0.00882085	0.0191737	0.113507	0.0279278	0.0392541	0.0130937	0.0366513	0.0202963
116	0.0997864	0.078705	0.0853128	0.0372537	0.167381	0.0542099	0.0235739	0.0758884	0.0224494	0.037976	0.0201522	0.0220826	0.0115573	0.0129753	0.112513	0.0310458	0.0358055	0.0217732	0.0192943	0.0302646
117	0.0760842	0.142138	0.116727	0.0495031	0.137252	0.0431708	0.0148679	0.0352421	0.0215806	0.0708112	0.0198232	0.0228156	0.0058195	0.0153321	0.0985271	0.0219328	0.0210367	0.023013	0.0242697	0.0400532
118	0.0100862	0.252429	0.185598	0.0905969	0.109465	0.046581	0.0186849	0.015662	0.00604793	0.0440374	0.0179567	0.0168897	0.00182641	0.0117001	0.0979762	0.00953094	0.023229	0.011529	0.0161705	0.0140023
119	0.0124429	0.364264	0.303393	0.108998	0.0210192	0.0225647	0.0229313	0.00915135	0.0028723	0.00526579	0.00320147	0.00248721	0.000777466	0.00334827	0.0896732	0.00315846	0.0184069	0.00171775	0.00198348	0.00234351
120	0.0122696	0.435329	0.348571	0.0562708	0.00537697	0.00203258	0.00744809	0.0155116	0.00184383	0.01435	0.00299486	0.0011854	0.00635038	0.00396431	0.0712137	0.00402986	0.0075196	0.00072465	0.00089997	0.00211376
121	0.0199275	0.461532	0.330322	0.0257708	0.0181347	0.00205991	0.00392984	0.00671786	0.000697294	0.0404801	0.00211479	0.000235858	1.67487e-05	0.00652692	0.0713577	0.00515346	0.00276075	0.000141052	0.000806402	0.0013136
122	0.0063823	0.451522	0.299544	0.00491104	0.00785717	0.00175335	0.0140386	0.0170597	0.00677116	0.0875801	0.0184838	0.00154077	0.000375403	0.0169682	0.0400235	0.00893536	0.00339379	0.00469771	0.00533187	0.00283058
123	0.0147831	0.405053	0.278108	0.00419017	0.00605498	0.0042096	0.0104961	0.00853497	0.0166007	0.0948401	0.00412218	0.00570355	0.00187968	0.0116508	0.0579622	0.0293065	0.0109429	0.0103108	0.00565674	0.0195947
124	0.0147898	0.35513	0.244305	0.0165497	0.0114828	0.0101899	0.0113548	0.0174425	0.020196	0.0763672	0.0370185	0.0141822	0.017172	0.0144329	0.0556676	0.0178246	0.0148475	0.0129877	0.0207599	0.0172992
125	0.313042	0.00120063	0.000779018	0.00154132	0.114415	0.00599282	0.00117581	0.0628185	0.0920035	0.0355339	0.0363949	0.0243873	0.00259784	0.00157673	0.00185867	0.00663684	0.0715414	0.0360826	0.0917514	0.0986696
126	0.236294	0.00335435	0.00150136	0.00455041	0.16633	0.0137234	0.0017977	0.0627274	0.110313	0.0276433	0.0731809	0.0168873	0.00955266	0.0023062	0.00217062	0.00893034	0.0532827	0.0300226	0.110508	0.0649235
127	0.263685	0.00226333	0.00177195	0.00207476	0.20921	0.0213132	0.00335085	0.0476731	0.0729075	0.0321885	0.0480037	0.0193485	0.00906167	0.0366058	0.00308693	0.00557195	0.0769197	0.023105	0.0686246	0.0532331
128	0.280363	0.00154829	0.000652994	0.00135235	0.196356	0.00916967	0.00122697	0.092701	0.0752726	0.00717606	0.0151839	0.0346254	0.0109876	0.017977	0.0114284	0.0189544	0.0814108	0.00772527	0.0417272	0.0941604
129	0.326738	0.0010048	0.000708601	0.000775666	0.157034	0.00290129	0.000842888	0.097491	0.0652173	0.0142804	0.0350508	0.0317686	0.000520887	0.00354743	0.00310909	0.0105796	0.0606818	0.027137	0.0718058	0.0888053
130	0.232352	0.00285158	0.00169793	0.001761	0.15438	0.00569936	0.00246508	0.0479779	0.0470649	0.0332802	0.0693594	0.0339171	0.00190805	0.0157128	0.00833685	0.0510786	0.0524555	0.0473162	0.0901444	0.100241
131	0.0450938	0.0396818	0.0288687	0.0251272	0.244343	0.0457713	0.0459325	0.0434646	0.0336485	0.0255849	0.0285584	0.0236491	0.0188787	0.0156947	0.0772444	0.0358522	0.0607493	0.0374821	0.052044	0.0723304
132	0.0635836	0.048122	0.0369411	0.0246979	0.245358	0.053695	0.0628117	0.0422102	0.024346	0.0369433	0.0329819	0.0153413	0.0210783	0.014282	0.111727	0.0243155	0.0471832	0.0190316	0.0285353	0.0468147
133	0.0589173	0.0688589	0.0596329	0.0408604	0.256594	0.0654163	0.0859664	0.0334354	0.0214393	0.0240262	0.012685	0.011772	0.013507	0.0150424	0.137176	0.0186054	0.036463	0.00875703	0.00732572	0.0235189
134	0.0499232	0.0623965	0.0627201	0.0356443	0.260391	0.0699799	0.0885819	0.0264076	0.0131811	0.0162693	0.0253076	0.0187787	0.00790802	0.0261013	0.143045	0.0162736	0.0387958	0.0105227	0.0118569	0.0159152
135	0.0496404	0.0484942	0.0557212	0.0352731	0.232315	0.0649385	0.0641313	0.0409553	0.0233766	0.0376816	0.0345315	0.0215495	0.0085404	0.0342886	0.118193	0.0211786	0.0438623	0.021221	0.0268081	0.0172992
136	0.0729428	0.04649	0.0675089	0.0283486	0.203303	0.0621323	0.0560113	0.0492787	0.0203368	0.0299393	0.0303172	0.017576	0.0112771	0.0201627	0.121392	0.0306999	0.0499057	0.0205376	0.038447	0.0233928
137	0.100237	0.0481337	0.0789485	0.036874	0.179131	0.061046	0.0330263	0.0680696	0.0356686	0.0385318	0.016454	0.0133466	0.0125413	0.0142619	0.139348	0.0248769	0.0407109	0.0174333	0.023564	0.0177971
138	0.0893009	0.0764423	0.0813757	0.0263514	0.169723	0.0496111	0.0301506	0.056881	0.0286668	0.0506779	0.0178051	0.0242654	0.0138838	0.0169856	0.135996	0.0303196	0.0284211	0.0252756	0.0240296	0.0238374
139	0.0830538	0.117419	0.098239	0.0358151	0.156962	0.0399532	0.0143916	0.040696	0.0288265	0.0788779	0.0103712	0.0207797	0.01021	0.028535	0.11119	0.0138301	0.0159348	0.029571	0.0289949	0.0363488
140	0.0415425	0.199489	0.126786	0.0355771	0.0985318	0.0199785	0.0106003	0.0598402	0.025333	0.0487027	0.0192775	0.0301144	0.0114483	0.0438247	0.109396	0.0230086	0.0277358	0.0211764	0.0165306	0.0311056
141	0.0151011	0.456968	0.309851	0.00800088	0.0252132	0.00262654	0.0112711	0.00713087	0.00100447	0.0700809	0.00251992	0.000458557	6.63226e-05	0.0025002	0.0761538	0.00242986	0.00650618	0.000306133	0.000706592	0.00110421
142	0.00532936	0.435085	0.261933	0.000308372	0.000737172	0.000341622	0.00120434	0.00524691	0.0121824	0.130746	0.0191169	0.00600868	0.000454126	0.0125837	0.0705759	0.0285134	0.00198302	0.00184456	0.00197387	0.00383203
143	0.0119389	0.461434	0.293715	0.00182403	0.00828432	0.00269576	0.00272997	0.00934035	0.00459651	0.111558	0.00441027	0.00126134	0.000490999	0.00308325	0.0383124	0.0108627	0.00437644	0.00971496	0.00959398	0.00977747
144	0.0199485	0.449335	0.28578	0.0028585	0.00579973	0.00258529	0.00356074	0.00750469	0.0122301	0.113904	0.00773097	0.00240114	0.00125488	0.0160582	0.0325792	0.0242634	0.00288962	0.00303669	0.0020336	0.00424616
145	0.0189342	0.437119	0.286231	0.00937397	0.00843388	0.0066227	0.00785815	0.0117652	0.00691258	0.0665464	0.00810213	0.00532194	0.0181091	0.00578466	0.0439626	0.0126301	0.0103507	0.00822572	0.00920062	0.0185153
146	0.234365	0.00852979	0.00448214	0.0163986	0.134424	0.0212651	0.00345591	0.00888869	0.0876534	0.0341235	0.0446409	0.0253467	0.00140504	0.0157228	0.00321354	0.0418829	0.0950812	0.0436232	0.108745	0.066753
147	0.26433	0.00198426	0.00156231	0.00270641	0.171023	0.0237264	0.00209715	0.048635	0.0852696	0.0144233	0.0507101	0.00854705	0.00916463	0.00521163	0.0102466	0.0296253	0.0617655	0.0424153	0.0992122	0.0673445
148	0.247196	0.00242384	0.00149146	0.00933	0.203322	0.0350051	0.00300239	0.0428692	0.0571186	0.0285589	0.00907569	0.037608	0.00103149	0.00386421	0.020315	0.0203643	0.0813078	0.0468001	0.0751583	0.0741581
149	0.270239	0.00563809	0.00348351	0.00852991	0.189093	0.0252613	0.00353983	0.0519798	0.0638273	0.00860556	0.0406373	0.0265311	0.00174626	0.0068708	0.0183424	0.0116169	0.0734777	0.0347449	0.0816111	0.0742249
150	0.29106	0.00155757	0.00152541	0.00277728	0.188697	0.030288	0.00283178	0.0729898	0.0473036	0.0122319	0.0295565	0.0454569	0.00129599	0.00259469	0.0119278	0.00986891	0.069624	0.0305126	0.0846838	0.0632165
151	0.274853	0.00148273	0.00191732	0.00253002	0.171184	0.0298299	0.00354593	0.054308	0.0230894	0.0171272	0.0342699	0.0336762	0.00424731	0.00546986	0.0323752	0.0375596	0.0586655	0.0480237	0.0875811	0.0782636
152	0.132242	0.0308625	0.0312479	0.0239568	0.21782	0.0499638	0.0617177	0.0505342	0.0191463	0.0328719	0.0216685	0.0132899	0.0323309	0.00967514	0.0875176	0.0321285	0.0514046	0.0236571	0.0362049	0.0417596
153	0.0991696	0.0558085	0.0535953	0.0326342	0.207115	0.0488934	0.0774807	0.0294804	0.021147	0.0232538	0.0314375	0.016078	0.0242472	0.0211559	0.135585	0.0173698	0.0373703	0.0164156	0.0227065	0.029056
154	0.0499683	0.0634035	0.0777073	0.0500241	0.220731	0.0686535	0.102215	0.0212188	0.018459	0.024341	0.0129968	0.0162701	0.00691418	0.0207348	0.146627	0.0126837	0.0471255	0.0109437	0.0102903	0.0186928
155	0.0481339	0.0690786	0.0902272	0.0378645	0.215571	0.0592632	0.0851935	0.0192835	0.0160244	0.0252079	0.0116209	0.0088302	0.00711373	0.0115744	0.169187	0.0143724	0.0508769	0.0135835	0.0173972	0.0295965
156	0.0742469	0.0692731	0.0871812	0.0316904	0.195277	0.0483984	0.0577576	0.0188584	0.0172372	0.0380443	0.0255872	0.0169491	0.0100628	0.0185774	0.146028	0.0146027	0.0474746	0.0261053	0.0300174	0.0266308
157	0.0703556	0.0794963	0.109857	0.0344795	0.168423	0.0495008	0.0471086	0.0267195	0.0286101	0.0419321	0.0264	0.0144804	0.00724906	0.0239432	0.135129	0.0274453	0.0463326	0.0177169	0.0200115	0.0248101
158	0.0710779	0.086221	0.0978992	0.0336418	0.158274	0.0512145	0.0400959	0.0492288	0.0218735	0.047725	0.0196736	0.00952602	0.00447962	0.0325426	0.142846	0.0153785	0.0347286	0.0265728	0.034583	0.0224177
159	0.0664283	0.0939545	0.0987278	0.0232253	0.167833	0.0471559	0.0442764	0.0453968	0.0298216	0.0305854	0.0286215	0.0215913	0.0083949	0.0166073	0.14244	0.0256077	0.0247724	0.0238336	0.0338374	0.0268895
160	0.0715627	0.256263	0.154237	0.0123616	0.0554921	0.0173327	0.021266	0.0305471	0.0221479	0.0447166	0.0282647	0.0250925	0.00631229	0.0199338	0.104967	0.0313302	0.0153856	0.0267826	0.0218293	0.0341751
161	0.0365417	0.356175	0.217456	0.0299721	0.0402549	0.0255513	0.0361909	0.0195746	0.0138299	0.0191083	0.00737081	0.0158069	0.00881309	0.0126442	0.0799868	0.0218712	0.015397	0.0140782	0.00695925	0.0224172
162	0.0188214	0.419255	0.266398	0.0164036	0.03024	0.00714856	0.0177366	0.00901652	0.00839103	0.0461895	0.0115712	0.00665626	0.00504721	0.031732	0.0584347	0.0137279	0.0129816	0.00647967	0.00636601	0.00740289
163	0.00500108	0.458671	0.277418	0.00189618	0.0384	0.00261655	0.00767574	0.00549688	0.00172433	0.0802743	0.0080665	0.000785834	0.000147735	0.00336616	0.056957	0.0120784	0.00414525	0.00212014	0.0217903	0.0113689
164	0.0235938	0.490877	0.299736	0.00282792	0.00705044	0.00287515	0.00687105	0.00524592	0.00137665	0.0749124	0.00263245	0.00169916	0.0149837	0.00278189	0.0336772	0.00627567	0.00199675	0.00385808	0.00456372	0.0121646
165	0.00858802	0.473393	0.291427	0.00080468	0.00141201	0.000946501	0.00252626	0.00274889	0.0172139	0.102959	0.00412822	0.00307532	0.0241213	0.0194794	0.0222219	0.00268334	0.00189724	0.00305393	0.0100027	0.0073175
166	0.00706381	0.495396	0.307449	0.00112327	0.000978665	0.000624203	0.00114149	0.00247086	0.0110554	0.102937	0.0231864	0.00130844	0.000203184	0.00402966	0.0266666	0.00335662	0.00189058	0.000979625	0.00141743	0.006722
167	0.190462	0.0333853	0.0121824	0.0147665	0.143754	0.0184786	0.00491509	0.0440846	0.0802576	0.0241396	0.0118996	0.0253613	0.0130176	0.00565848	0.00955098	0.0443052	0.0711834	0.0685219	0.101869	0.0822062
168	0.307781	0.00678507	0.00775128	0.00489873	0.184759	0.0193149	0.00971051	0.0535481	0.0329202	0.0158168	0.0308796	0.0135172	0.0232991	0.0306678	0.0147445	0.0278983	0.0420857	0.0355176	0.0890783	0.0490264
169	0.308527	0.0044806	0.00331587	0.00383711	0.195496	0.0318841	0.00625058	0.0552679	0.0450146	0.0257725	0.0399478	0.0194222	0.0024899	0.00971773	0.0138932	0.0113633	0.0430124	0.0386857	0.0838726	0.0577487
170	0.343573	0.0145939	0.0087379	0.0068914	0.200361	0.0383116	0.0105556	0.0419392	0.0277148	0.00495392	0.0358057	0.0155384	0.00283772	0.00503736	0.0353854	0.0147546	0.0596266	0.0288405	0.0627704	0.0417712
171	0.302004	0.0133965	0.00489695	0.0063486	0.1936	0.0489342	0.00856858	0.029762	0.0184701	0.0361854	0.0333861	0.0315737	0.00263886	0.00675209	0.0610371	0.0204622	0.0538989	0.0352215	0.0634393	0.0294239
172	0.178786	0.0138774	0.0226795	0.0119785	0.190082	0.0571615	0.0272298	0.0400362	0.0212095	0.0439948	0.0287623	0.0165164	0.0149056	0.0278063	0.103055	0.04665	0.0545535	0.0238478	0.0311093	0.0457577
173	0.133374	0.0424171	0.0475395	0.0312235	0.170001	0.0571811	0.0562136	0.0371912	0.0202312	0.0591595	0.0190782	0.0156467	0.015125	0.0111339	0.121895	0.0208836	0.0576902	0.0244093	0.029004	0.0306019
174	0.0982035	0.0578986	0.0581533	0.0318221	0.162552	0.0498649	0.0620865	0.0294562	0.0178269	0.0446289	0.0172645	0.0282055	0.0591056	0.0182832	0.151577	0.0170551	0.0401771	0.014032	0.0197307	0.022076
175	0.0492117	0.0722417	0.0769998	0.0401002	0.16507	0.051836	0.0749651	0.0184038	0.0144625	0.0220582	0.0256378	0.0291897	0.0134946	0.0188552	0.159546	0.0139502	0.0522846	0.029069	0.0446199	0.0280043
176	0.0425179	0.0747859	0.0864655	0.0424597	0.184945	0.0574077	0.0759382	0.0231878	0.0142535	0.0154752	0.0196067	0.0131343	0.0107746	0.0221603	0.179372	0.0164206	0.0550351	0.0197153	0.0236874	0.022657
177	0.0722209	0.073174	0.0849555	0.0402423	0.175177	0.0542591	0.0703227	0.021389	0.021872	0.0415931	0.0199184	0.0123565	0.0108822	0.0198103	0.156322	0.0204558	0.0452527	0.0189278	0.0178333	0.0230356
178	0.0500767	0.0931764	0.0882102	0.0335171	0.170342	0.0575909	0.0591952	0.0220453	0.0210487	0.0326003	0.0308324	0.0151765	0.00921898	0.0351492	0.162187	0.0217832	0.0477244	0.0167983	0.0165184	0.0168095
179	0.0527057	0.111455	0.112626	0.0300635	0.134571	0.0473056	0.0458182	0.0341694	0.0202215	0.0312611	0.0304053	0.0196106	0.01155	0.0321858	0.154573	0.0276263	0.045002	0.0188289	0.0225838	0.0174372
180	0.0952391	0.118446	0.113194	0.029638	0.146657	0.0456337	0.0479283	0.0191733	0.010486	0.00841013	0.0538107	0.0105662	0.00735734	0.0130426	0.146853	0.0127926	0.0394742	0.0208821	0.0350564	0.0253593
181	0.0808317	0.294441	0.165143	0.0161295	0.0625423	0.0216008	0.0299668	0.0183598	0.0160631	0.0311189	0.0154639	0.0130567	0.00372438	0.00868891	0.083992	0.0251779	0.0186293	0.0344927	0.0266119	0.0339662
182	0.0418356	0.367778	0.232816	0.0259093	0.063375	0.0241682	0.0324272	0.01229	0.00921026	0.0115007	0.0193988	0.0119445	0.00733488	0.00859335	0.0605469	0.00927304	0.0170376	0.0128191	0.0180807	0.0136614
183	0.0501117	0.431602	0.283532	0.0148321	0.0450428	0.0191885	0.0171325	0.00962628	0.00423397	0.00581175	0.0153403	0.0017314	0.00159286	0.0036494	0.0544872	0.00626555	0.0137503	0.00370479	0.0121023	0.00626252
184	0.0108811	0.484161	0.30448	0.00538412	0.0329278	0.00727462	0.00321982	0.00623754	0.003428	0.0189756	0.0199583	0.00329419	0.000743657	0.00408029	0.0439194	0.00671944	0.0111251	0.00469299	0.0169804	0.011516
185	0.00759453	0.503962	0.296482	0.000627887	0.00292172	0.000534131	0.000590775	0.00108337	0.0127251	0.113514	0.0286882	0.00499749	2.32056e-05	0.00473129	0.016911	0.00165146	0.000625566	0.000152963	0.000896044	0.00128679
186	0.00367014	0.501802	0.285476	0.000421896	0.00110774	0.000242824	0.000482387	0.000833541	0.00289332	0.116985	0.0380161	0.0258961	4.721e-05	0.00849262	0.00369603	0.00239054	0.000603787	0.000659802	0.00497886	0.00130447
187	0.00681804	0.469457	0.250531	0.000170808	0.000652878	0.000269639	0.000856165	0.00280221	0.0383188	0.190434	0.00166046	0.0014182	0.000186057	0.0202766	0.009235	0.00325154	0.000926479	0.000364222	0.000860228	0.00151073
188	0.268034	0.02119	0.00948214	0.00584447	0.172019	0.0385592	0.0121306	0.0577238	0.062093	0.0236986	0.00529964	0.0254257	0.0276936	0.0108741	0.00778209	0.0311082	0.0487034	0.0578603	0.054517	0.059961
189	0.330247	0.0146622	0.00738882	0.00529009	0.169349	0.0308086	0.00863611	0.0623328	0.0239419	0.00624392	0.0175898	0.018171	0.0368505	0.0360776	0.0305681	0.0169554	0.0428741	0.0368471	0.0648531	0.0403132
190	0.326084	0.0321518	0.00515454	0.00558395	0.169319	0.0304964	0.0102567	0.0880579	0.024407	0.0111036	0.013607	0.0108547	0.00321796	0.0147407	0.0320607	0.00491292	0.0486721	0.0552684	0.0662809	0.0477703
191	0.281537	0.022307	0.0188844	0.013628	0.15563	0.0410192	0.0217079	0.0425848	0.0197603	0.0398428	0.0182489	0.0179141	0.00549316	0.0127626	0.107357	0.0209688	0.0563549	0.0353026	0.0438479	0.024848
192	0.24061	0.0315356	0.0409366	0.0233929	0.149116	0.0494772	0.0262103	0.0269723	0.0177992	0.0374072	0.00713171	0.0111076	0.0109043	0.0177231	0.156171	0.035292	0.0534614	0.015315	0.0138521	0.0355845
193	0.144117	0.0436686	0.06189	0.0342673	0.141792	0.0536256	0.0419062	0.0258852	0.0362194	0.0452563	0.0165306	0.0280775	0.0185563	0.0184851	0.162425	0.0200196	0.0436554	0.0171393	0.0247506	0.0217332
194	0.120582	0.0637347	0.0669133	0.028614	0.149218	0.0512496	0.0548553	0.0251056	0.0268208	0.0396534	0.0103966	0.0220717	0.0177575	0.01785	0.176229	0.0128194	0.0495124	0.0181846	0.020714	0.0277177
195	0.0899383	0.0632262	0.0705788	0.0224304	0.150736	0.0419322	0.0746146	0.0300046	0.0333524	0.0387595	0.0145249	0.0138879	0.0102645	0.0202928	0.167087	0.0142319	0.0449302	0.0293585	0.0339745	0.0358752
196	0.037379	0.0777147	0.0771223	0.032301	0.163329	0.046336	0.0749897	0.0390629	0.0281174	0.0118513	0.0144979	0.0112882	0.016936	0.026706	0.188342	0.0207679	0.0530262	0.0247933	0.0279812	0.0274587
197	0.0544489	0.0874297	0.0896062	0.0350029	0.149146	0.0457021	0.0616365	0.0269882	0.0280381	0.0129725	0.0239367	0.012493	0.0186996	0.0263005	0.184932	0.0229408	0.053044	0.0196632	0.0192434	0.0277754
198	0.0808914	0.109982	0.103039	0.0351286	0.137247	0.0454504	0.0541844	0.0233391	0.0135494	0.0149187	0.0340283	0.0127663	0.0107473	0.0191589	0.163619	0.0145216	0.0503202	0.0214923	0.0320931	0.023523
199	0.0560439	0.138388	0.131935	0.0428084	0.122085	0.0566557	0.0591086	0.0422977	0.0187775	0.0253079	0.0113582	0.0102973	0.00860559	0.0180362	0.159357	0.0143322	0.0531912	0.00789689	0.00797872	0.0155385
200	0.0435921	0.182195	0.145495	0.0286254	0.111595	0.0397369	0.0400298	0.0355935	0.0124225	0.0252541	0.0269559	0.0115377	0.0131455	0.0258986	0.14336	0.0189284	0.0457056	0.0135087	0.0173579	0.0190626
201	0.0655097	0.271892	0.173885	0.029261	0.0699331	0.0347161	0.0241673	0.0282405	0.0135523	0.0141856	0.0139417	0.0130802	0.0131562	0.026622	0.117761	0.0125606	0.0382176	0.0105676	0.00992269	0.0188274
202	0.0436329	0.333986	0.203987	0.0235365	0.0539844	0.0221721	0.0229881	0.0157661	0.00838097	0.0147702	0.0415366	0.0250141	0.00439628	0.0251332	0.0697559	0.011465	0.0174958	0.0201483	0.0301434	0.0117073
203	0.0520532	0.411108	0.252841	0.0176979	0.0418534	0.0131407	0.0169824	0.0125303	0.00801299	0.0161688	0.0129191	0.0164318	0.00787058	0.0129724	0.0521464	0.0106599	0.0161335	0.00864278	0.0109096	0.00892446
204	0.0466192	0.462749	0.297826	0.0123909	0.0243735	0.0069354	0.00522856	0.0121052	0.00329014	0.0202257	0.0123026	0.00163311	0.00111116	0.0150706	0.0449262	0.00601678	0.0149548	0.00169645	0.00563903	0.00490559
205	0.0194105	0.509881	0.33501	0.00978074	0.0255959	0.00234703	0.00440619	0.00426046	0.000330471	0.0239418	0.0202248	0.00018616	1.06018e-05	0.00205893	0.034931	0.00182135	0.00287917	0.000122232	0.00190633	0.000895155
206	0.0140454	0.539368	0.340661	0.00250036	0.00317359	0.000568922	0.000838106	0.00116859	0.000288663	0.0641856	0.00225344	0.000222411	2.42567e-05	0.00379706	0.0230416	0.00175147	0.000731348	0.000121468	0.000389594	0.000869107
207	0.0109608	0.543469	0.309858	0.000776928	0.00142556	0.000374489	0.000557681	0.00122881	0.00124813	0.0984958	0.00087784	0.000155722	1.55396e-05	0.0039526	0.0165648	0.00735636	0.000679665	0.000102412	0.000360579	0.00153912
208	0.00593059	0.484515	0.242141	0.000321799	0.00266631	0.000581625	0.000960903	0.00198854	0.0280562	0.196688	0.00544393	0.00449531	0.000193495	0.00180109	0.00496542	0.00194087	0.00109111	0.00265279	0.0113057	0.00225971
209	0.284943	0.0128528	0.00787582	0.00875275	0.163494	0.030005	0.00832358	0.0665592	0.0550064	0.0125039	0.0656842	0.0145465	0.0284587	0.00807487	0.0318965	0.0191352	0.0526763	0.0355159	0.0645144	0.0291809
210	0.278579	0.0320243	0.0136961	0.0195125	0.161397	0.0487264	0.025106	0.0826245	0.0544688	0.0314832	0.0178398	0.00932311	0.00707613	0.013921	0.0476059	0.0200944	0.0478408	0.0254591	0.0307561	0.0324652
211	0.313371	0.0300436	0.00877735	0.0121994	0.122383	0.0463086	0.0196525	0.0579342	0.0582538	0.0139027	0.0286441	0.0300995	0.00576901	0.00985707	0.055312	0.0133482	0.0398553	0.0501488	0.0617458	0.0223948
212	0.3013	0.0396015	0.033243	0.0184523	0.107681	0.0513286	0.0439635	0.0399183	0.0226924	0.0113482	0.0275868	0.0169989	0.00541727	0.0121164	0.106881	0.0112319	0.0315038	0.0417702	0.0509833	0.0259826
213	0.253269	0.0248884	0.0284283	0.0132231	0.130911	0.0379595	0.0344354	0.0498955	0.0324248	0.0404307	0.0225948	0.0154291	0.00815299	0.0167218	0.119827	0.030508	0.0377703	0.0350215	0.0438041	0.0243044
214	0.173242	0.0528599	0.0616148	0.025658	0.124952	0.0477298	0.0372317	0.0317072	0.0268747	0.0411731	0.0148458	0.0181243	0.00830608	0.0246585	0.165305	0.0379352	0.0423895	0.0201808	0.0181577	0.0270535
215	0.105185	0.0528388	0.0594547	0.0342274	0.121615	0.0555141	0.0453775	0.0181119	0.0378332	0.0333939	0.0200472	0.0208364	0.0251176	0.0472999	0.175085	0.0279886	0.046387	0.0201792	0.0240312	0.0294769
216	0.0917867	0.0710999	0.0723409	0.0321928	0.133573	0.0512775	0.0517395	0.0296465	0.0187388	0.028244	0.0176406	0.0143872	0.0185014	0.0246741	0.202781	0.0190499	0.0642982	0.0177063	0.016858	0.0234644
217	0.0874704	0.0692542	0.0738216	0.0287933	0.143546	0.0461255	0.0608163	0.0364884	0.0201617	0.0453053	0.0149073	0.0131113	0.0128303	0.0143119	0.203531	0.0220434	0.0518169	0.0178758	0.01317	0.0246197
218	0.0714548	0.0762254	0.0752926	0.0415616	0.150571	0.050293	0.0629058	0.0364904	0.0174531	0.0131238	0.0157675	0.0129648	0.0317555	0.0239647	0.194657	0.0185746	0.0501956	0.0178963	0.0179498	0.020903
219	0.0376335	0.0941476	0.0881239	0.0371259	0.135853	0.0473802	0.0504227	0.0398586	0.0271598	0.0181669	0.00996712	0.0123057	0.0243433	0.0287016	0.193556	0.0293105	0.0542153	0.0217071	0.0125062	0.0375149
220	0.0583824	0.11415	0.0988087	0.0350205	0.125071	0.0452881	0.0519408	0.029627	0.0149956	0.0262996	0.0171075	0.0160524	0.0134558	0.0333906	0.170697	0.0245301	0.0393175	0.0238439	0.0241425	0.0378782
221	0.068714	0.152142	0.112527	0.03528	0.116202	0.048388	0.0573946	0.0274944	0.0127478	0.0401	0.00932704	0.0151113	0.00942885	0.0269422	0.156056	0.0141706	0.0309166	0.0173177	0.0208743	0.0288657
222	0.0640645	0.213398	0.152374	0.0263339	0.0674855	0.0273036	0.0410064	0.0250949	0.0223092	0.0531611	0.0181067	0.0153249	0.0116823	0.0244686	0.126568	0.015163	0.0328556	0.0176269	0.0214075	0.0242651
223	0.0778113	0.301465	0.200566	0.0270364	0.0493004	0.0188589	0.0194478	0.0200158	0.0169017	0.0387015	0.0116287	0.00773465	0.00818556	0.0202751	0.109087	0.010714	0.0326227	0.00680261	0.00907811	0.013766
224	0.0325909	0.416041	0.270921	0.0297122	0.0189658	0.0127544	0.0122736	0.0266781	0.016948	0.00941501	0.00682425	0.00536544	0.00484296	0.0224613	0.0603136	0.0092128	0.0200338	0.0102305	0.00486606	0.00954937
225	0.0210577	0.504032	0.326862	0.0206175	0.00557882	0.00297142	0.00861273	0.00560272	0.000659252	0.00373722	0.00341516	0.00122441	0.000199029	0.0301281	0.0327165	0.0079397	0.0167476	0.00114714	0.00182182	0.004929
226	0.0150979	0.497587	0.318091	0.00174286	0.00916586	0.000964053	0.00193153	0.00144084	0.000594128	0.0435267	0.0426607	0.000934563	0.00037563	0.0471706	0.0115898	0.00210361	0.00115455	0.000284183	0.00259386	0.000990076
227	0.0217711	0.522805	0.323021	0.0113648	0.0174244	0.00422998	0.0100621	0.00312897	0.00206669	0.0508633	0.00290964	0.000665508	0.000320021	0.00199213	0.0194492	0.00225123	0.00284938	0.000767365	0.00145937	0.000599356
228	0.00541146	0.518115	0.303709	6.37489e-05	0.00147509	0.000237428	0.00022692	0.00196713	0.00355786	0.0967856	0.0438217	0.000359399	8.71162e-06	0.00637426	0.0051514	0.00118422	0.000615301	0.000101216	0.00958501	0.00124938
229	0.00839487	0.58367	0.333961	0.00604664	0.001097	0.000546682	0.00139212	0.00153527	0.000264189	0.0361954	0.00384281	0.000236951	4.028e-05	0.00727931	0.0111128	0.00167224	0.00144026	0.000191056	0.000434857	0.000646251
230	0.0139674	0.546866	0.288872	0.00131745	0.00313059	0.00114388	0.00235524	0.00289079	0.000930889	0.105491	0.0162974	0.000892231	0.000145539	0.00134164	0.00767496	0.00323042	0.00120861	0.000432664	0.000868799	0.000941706
231	0.281625	0.0382204	0.0142221	0.022684	0.11079	0.0392703	0.0294702	0.0560536	0.0608565	0.0356715	0.00947186	0.0151931	0.0106615	0.0119114	0.0871341	0.0371129	0.0355634	0.0457315	0.0230921	0.0352653
232	0.302772	0.0290844	0.0198522	0.02941	0.111268	0.0575202	0.0411652	0.0421105	0.0501244	0.0059947	0.0266661	0.0124603	0.00635438	0.00561931	0.101822	0.0116869	0.0351813	0.0430753	0.0401154	0.0277171
233	0.279495	0.0240022	0.0208337	0.0246185	0.085579	0.044665	0.0494001	0.0366632	0.0286944	0.0196188	0.0529187	0.0275905	0.00841488	0.0200269	0.122489	0.0165614	0.0272138	0.0433307	0.0456185	0.0222655
234	0.229081	0.0216736	0.0368085	0.026973	0.101695	0.0457405	0.0496064	0.0417221	0.0207989	0.0313171	0.0231075	0.0191774	0.0121539	0.0158805	0.147799	0.0210402	0.0383085	0.044587	0.0488399	0.0236901
235	0.166888	0.0501169	0.0634238	0.0268678	0.0959299	0.0396571	0.034449	0.023723	0.0328627	0.0388571	0.0200077	0.0189725	0.0165145	0.0295299	0.177566	0.0312908	0.0395186	0.0302672	0.0301949	0.0333632
236	0.102509	0.0583385	0.0737355	0.0350669	0.0913221	0.0488217	0.0382989	0.0282646	0.0348115	0.0381529	0.0225489	0.0186084	0.0191301	0.0509286	0.185797	0.0292133	0.0415338	0.0227025	0.0265578	0.0336584
237	0.0943725	0.077158	0.0870033	0.026079	0.106675	0.0467913	0.0437537	0.0319079	0.0215549	0.0333879	0.0203038	0.0431387	0.0156952	0.0318104	0.193916	0.0183035	0.0464337	0.0176136	0.0197108	0.0243907
238	0.0997323	0.0874733	0.0851105	0.0241122	0.132099	0.0501545	0.0568778	0.0452121	0.0183824	0.0137454	0.0172524	0.0153188	0.0150477	0.0142536	0.204441	0.0132259	0.0433227	0.0171691	0.027039	0.0200301
239	0.0602859	0.0825487	0.0739733	0.0361619	0.135217	0.049803	0.0580084	0.0583858	0.0145767	0.0170499	0.0223196	0.0157829	0.018962	0.0156758	0.20504	0.0211017	0.0404896	0.0197883	0.0344401	0.0203899
240	0.054867	0.109632	0.0944759	0.0354479	0.134905	0.0487993	0.0637777	0.0285655	0.0211668	0.0225358	0.0323143	0.0204212	0.0117557	0.0205077	0.170893	0.0188995	0.0298712	0.0239284	0.0280771	0.0291596
241	0.0585803	0.128811	0.0984977	0.027887	0.108202	0.0354362	0.0427943	0.0296689	0.0180826	0.0265259	0.029009	0.0191659	0.0325023	0.0289023	0.165712	0.0210038	0.0281555	0.027961	0.0346737	0.0384286
242	0.0663486	0.176282	0.113523	0.0392146	0.0939608	0.0418094	0.0446226	0.0179935	0.0236152	0.035249	0.0118728	0.0163769	0.0178711	0.029457	0.140642	0.0275426	0.0297575	0.0218424	0.0188089	0.0332106
243	0.0677236	0.233368	0.155716	0.0195447	0.0588928	0.0247206	0.0324977	0.0161528	0.0448982	0.0646799	0.0109638	0.0117627	0.00805962	0.0189703	0.114229	0.0225291	0.018977	0.0219718	0.0223475	0.0319944
244	0.0334328	0.339866	0.223973	0.027618	0.0300252	0.0174418	0.0227762	0.0156925	0.0196469	0.0401382	0.0102497	0.0111805	0.0120053	0.0165893	0.088296	0.0170282	0.0269103	0.0156768	0.0127271	0.0187262
245	0.017845	0.481298	0.324458	0.0210736	0.00269707	0.00351825	0.00693436	0.00478785	0.0111801	0.0319739	0.00841866	0.00642559	0.00102861	0.00360601	0.0422662	0.0131943	0.00437464	0.00742091	0.00294099	0.00455763
246	0.0107289	0.572607	0.361571	0.00860022	0.00535511	0.000312286	0.000603296	0.000526085	5.24303e-05	0.00884688	0.00163196	3.32967e-05	3.81502e-07	0.0016537	0.0256942	0.0007793	0.000434306	3.22823e-05	0.000408763	0.000128752
247	0.0155297	0.566506	0.359921	0.00957014	0.00149706	0.000176082	0.000280619	0.0199327	2.51638e-05	0.0169351	0.00150484	9.80798e-06	1.98986e-12	0.000610926	0.00688553	0.000375066	7.98917e-05	6.47757e-06	0.000104851	4.90449e-05
248	0.0100481	0.584148	0.356521	0.000703725	0.00166593	5.89812e-05	0.000117211	0.000291827	5.53655e-05	0.0379837	0.000511375	9.57614e-06	0	0.000715071	0.00662389	0.00033933	2.86664e-05	2.00546e-06	6.56473e-05	0.000110225
249	0.0136439	0.59601	0.325359	0.000591205	0.00181314	0.000239825	0.000746547	0.000424421	0.000621609	0.0340377	0.00376912	7.69651e-05	1.08163e-05	0.00450156	0.0139625	0.00148626	0.00162014	7.73238e-05	0.000360205	0.000647943
250	0.0170978	0.588921	0.311161	0.00259704	0.00294343	0.000871703	0.00120412	0.00692189	0.00123589	0.0166359	0.011576	0.000930603	0.000487681	0.00554137	0.0188383	0.00620282	0.00191657	0.000822566	0.00233739	0.0017571
251	0.25487	0.0602431	0.0313222	0.0220213	0.0950506	0.0339072	0.0484355	0.043713	0.0657587	0.0430403	0.0145636	0.00781316	0.0477058	0.00621549	0.0997855	0.0173191	0.0169594	0.0294888	0.0364119	0.0253747
252	0.26834	0.0657329	0.0434879	0.0241045	0.0775003	0.0320553	0.0310798	0.0327695	0.0323408	0.0260587	0.0239751	0.0122968	0.0343528	0.0109226	0.132762	0.0216561	0.0332297	0.0300753	0.0401346	0.0271246
253	0.259013	0.0463162	0.0506277	0.0355362	0.068923	0.0408746	0.0521109	0.0268294	0.0232739	0.0475333	0.0231031	0.0128598	0.00938577	0.0118026	0.139034	0.022309	0.0433197	0.0340401	0.0291182	0.0239893
254	0.217208	0.0471358	0.0730252	0.0304323	0.0656281	0.0313507	0.0621516	0.028091	0.0172161	0.040524	0.0268179	0.0144208	0.012391	0.0184097	0.161838	0.0243656	0.0392687	0.0296543	0.0352386	0.0248319
255	0.113147	0.0638557	0.0863566	0.0453146	0.0638646	0.0365177	0.0475326	0.0241174	0.0175216	0.0283896	0.0513986	0.020714	0.0148422	0.021175	0.170012	0.0252011	0.0540263	0.0352435	0.0548921	0.0258775
256	0.0582126	0.086076	0.110255	0.0400127	0.0532822	0.0363187	0.0392067	0.0358055	0.0372199	0.0415332	0.0354173	0.0196594	0.0214094	0.0298905	0.195476	0.0241844	0.055578	0.0213744	0.0323313	0.0267567
257	0.0981624	0.123169	0.126825	0.0301718	0.0702678	0.0406612	0.0266109	0.0364556	0.0231224	0.0443758	0.0231566	0.0117232	0.0151464	0.0183078	0.195723	0.0187755	0.0360387	0.0165463	0.0261083	0.0186522
258	0.0975711	0.148902	0.131729	0.0266153	0.0734438	0.0339638	0.0319478	0.0371123	0.0166852	0.0465379	0.00814028	0.0115512	0.010466	0.0290891	0.203479	0.0227037	0.0323385	0.00974641	0.00721359	0.0207639
259	0.0397969	0.173228	0.128631	0.0315603	0.109659	0.0439922	0.0342389	0.0404928	0.032375	0.0223879	0.0234667	0.0104019	0.0105687	0.0219216	0.156575	0.0148276	0.0275821	0.022617	0.0282519	0.027425
260	0.0635956	0.183356	0.1411	0.031226	0.0766009	0.0333056	0.0273901	0.0215995	0.017779	0.0381381	0.0269489	0.0110986	0.00839814	0.0241262	0.152694	0.0259754	0.0226036	0.0285392	0.0334497	0.0320757
261	0.0773617	0.203845	0.143292	0.0338018	0.0703888	0.0336496	0.0346324	0.0181994	0.0221614	0.0246635	0.0214838	0.0171462	0.0150785	0.0228934	0.12254	0.0208006	0.0201675	0.0303547	0.0343698	0.0331702
262	0.0729837	0.275147	0.178727	0.019298	0.0535474	0.022867	0.0220644	0.0204296	0.0207355	0.0312077	0.0112465	0.0158404	0.0137017	0.0206812	0.1053	0.0189479	0.019051	0.0243017	0.0241717	0.0297511
263	0.0470939	0.35952	0.242628	0.0173352	0.0389487	0.0180274	0.0245378	0.0237298	0.014147	0.0417515	0.00903191	0.00766887	0.011114	0.0159815	0.0687444	0.0109119	0.0207204	0.00885225	0.0100478	0.00920856
264	0.0185129	0.445991	0.302089	0.00689637	0.00840568	0.00482987	0.00510926	0.00550987	0.0212913	0.0696391	0.0183534	0.0160579	0.00195524	0.0104767	0.0328631	0.00896554	0.00913553	0.00490372	0.00425151	0.00476308
265	0.0124966	0.54845	0.3532	0.0100225	0.00482091	0.000689501	0.000779547	0.00634474	0.000150646	0.0295782	0.00736403	0.000116655	2.63693e-07	0.00123167	0.0210728	0.00107965	0.000907547	5.11447e-05	0.000962878	0.000680481
266	0.016928	0.553448	0.332834	0.000450404	0.00137574	0.000205572	0.000395501	0.00118898	0.000439078	0.0546353	0.0150913	2.37924e-05	7.20539e-09	0.013166	0.00829617	0.000745396	0.00016896	6.55222e-06	0.000337649	0.000262948
267	0.0152067	0.592598	0.334846	0.00690779	0.00870443	0.000327954	0.00119826	0.00049268	6.40863e-05	0.0120641	0.000858021	4.72109e-05	4.37128e-06	0.0195121	0.00601396	0.000444881	0.000316328	3.81173e-05	0.000178574	0.000176007
268	0.0205283	0.616097	0.309751	0.00247643	0.00461432	0.000492083	0.00079548	0.00091716	0.000365853	0.0120812	0.00817223	0.000290183	1.7554e-05	0.00147165	0.0163583	0.0015593	0.000557242	0.000142331	0.0021774	0.0011356
269	0.0106098	0.591473	0.275622	0.00490183	0.0211898	0.00566771	0.015253	0.0033043	0.00203294	0.0113023	0.00421324	0.00418987	0.0252638	0.00352692	0.00692873	0.00341557	0.0038879	0.00223225	0.00226863	0.00271689
270	0.236876	0.0558338	0.0736518	0.0260708	0.0643656	0.0282132	0.0290215	0.0349824	0.0198239	0.0327227	0.00826082	0.00891168	0.0434784	0.0107446	0.170668	0.0528417	0.0388196	0.0140935	0.0189597	0.0316611
271	0.229203	0.0486383	0.0722061	0.0315965	0.0446031	0.0349427	0.0451453	0.0249273	0.019419	0.0249317	0.0281024	0.0212848	0.0328018	0.0253614	0.16161	0.0265431	0.042979	0.030315	0.0325609	0.0228288
272	0.176587	0.0722199	0.0903726	0.0456627	0.0553461	0.0403796	0.0569126	0.0271466	0.0174683	0.0226579	0.015333	0.0144202	0.0152031	0.0228555	0.17013	0.0393499	0.0448319	0.0260249	0.0191458	0.0279528
273	0.0957889	0.0986705	0.112051	0.0533305	0.0548546	0.0409008	0.0622552	0.0254489	0.019287	0.0241658	0.0191852	0.0150147	0.0163775	0.0252958	0.170086	0.0432754	0.0562276	0.0223038	0.0194124	0.0260678
274	0.0607333	0.108381	0.140716	0.0418356	0.0481275	0.034511	0.0467852	0.0432137	0.0187037	0.0128784	0.0398105	0.0235426	0.00927175	0.0282088	0.172898	0.0323976	0.0510433	0.0240646	0.0338916	0.0289864
275	0.0734832	0.132399	0.155583	0.0293999	0.0678714	0.0428228	0.0417418	0.0362814	0.0232051	0.0398185	0.0242387	0.0186873	0.0140694	0.0249699	0.17773	0.0208954	0.0314223	0.0132152	0.0158075	0.0163578
276	0.0940301	0.190886	0.18298	0.0305085	0.0696683	0.0366368	0.0350232	0.0396531	0.010907	0.0383064	0.00759618	0.0124639	0.00687329	0.012626	0.161093	0.0166505	0.0210888	0.00590487	0.00594151	0.0211619
277	0.0796359	0.230804	0.192427	0.0261903	0.0712345	0.0289165	0.0271233	0.0427524	0.0293712	0.031247	0.0151784	0.0097426	0.00499023	0.0203275	0.121792	0.013468	0.0110033	0.00997849	0.017854	0.0159636
278	0.0600132	0.21747	0.174419	0.0261251	0.0814494	0.0321765	0.0228122	0.0350022	0.0279469	0.0311386	0.0217989	0.0158858	0.0184057	0.0176282	0.127822	0.0148893	0.0206728	0.0133201	0.0263944	0.0146293
279	0.0891891	0.222721	0.167596	0.0252566	0.0770524	0.0322583	0.0277014	0.0282589	0.0163015	0.0455797	0.0159513	0.0106968	0.0106873	0.0144888	0.121315	0.0134389	0.0205433	0.0158898	0.0270963	0.0179778
280	0.0671864	0.250825	0.171475	0.0248001	0.0624688	0.0316208	0.0242402	0.0393112	0.0162985	0.0333028	0.0202162	0.0217285	0.0102226	0.0199572	0.105614	0.0163787	0.0174023	0.0187348	0.0291529	0.0190635
281	0.0680612	0.31335	0.215408	0.0225641	0.0344405	0.0187459	0.0187125	0.0232243	0.010411	0.0393694	0.018638	0.0104869	0.00643788	0.0167268	0.104257	0.0117949	0.0194502	0.0110874	0.0252853	0.0115494
282	0.00944029	0.420505	0.293107	0.00986459	0.017709	0.00374079	0.00695191	0.0396414	0.00187821	0.0375575	0.00948359	0.00279052	0.000303044	0.037544	0.0733839	0.00447207	0.0278429	0.000460496	0.00165692	0.00166706
283	0.0138971	0.431677	0.286086	0.00340025	0.0101205	0.00221498	0.00390304	0.00378993	0.0111397	0.0780109	0.00620245	0.0117451	0.00172097	0.0457697	0.0383978	0.00735638	0.00401113	0.0109199	0.0186071	0.0110306
284	0.0100654	0.481445	0.301133	0.000422088	0.00366476	0.000787139	0.000410461	0.000970578	0.00382909	0.0848552	0.013514	0.000413699	0.0365934	0.0155313	0.00442498	0.00453113	0.000949988	6.30689e-05	0.0339807	0.00241498
285	0.00985928	0.543659	0.321619	0.00124522	0.00925231	0.000540922	0.00109994	0.00126228	0.000154101	0.088359	0.00187397	0.000126201	4.38833e-06	0.00497265	0.0109809	0.00303122	0.000784892	5.52311e-05	0.000431341	0.000687257
286	0.00859438	0.586377	0.331602	4.80354e-05	0.000311734	4.23638e-06	3.74267e-05	0.000409534	0.000104914	0.0660534	0.00211058	1.03966e-08	0	0.000285826	0.00385643	0.00016088	5.90251e-06	2.48521e-10	1.78973e-05	1.94772e-05
287	0.0176984	0.581414	0.273241	0.000613466	0.00359428	0.000445851	0.000509313	0.000861903	0.000269248	0.0638442	0.026895	0.000123742	1.44846e-05	0.00294595	0.0243356	0.00107	0.000666973	9.13201e-05	0.00103302	0.000332256
288	0.228367	0.0327273	0.0650055	0.0293203	0.0548556	0.0355851	0.0428267	0.0371744	0.0206817	0.0207119	0.024197	0.0243043	0.0489315	0.0381319	0.174547	0.0393605	0.034367	0.0161087	0.0157954	0.017001
289	0.160422	0.0742864	0.0931542	0.0394974	0.0553382	0.0355613	0.059906	0.0359697	0.0233701	0.0245789	0.0170514	0.0147824	0.0208995	0.0259396	0.168912	0.0556004	0.0386035	0.0198175	0.0155424	0.020767
290	0.093029	0.108268	0.132939	0.0478657	0.0583698	0.0419126	0.0755208	0.0216719	0.0241072	0.0256115	0.0138152	0.0120465	0.0082857	0.0378236	0.162399	0.0522391	0.0411287	0.0159576	0.0150821	0.0119264
291	0.090413	0.126693	0.157877	0.0362586	0.053096	0.0384388	0.0569351	0.0295381	0.0156875	0.0110728	0.0364511	0.0223656	0.00948551	0.0346338	0.141354	0.0387947	0.0378251	0.024777	0.0210957	0.0172074
292	0.0605602	0.163898	0.182981	0.0232754	0.0294987	0.0268735	0.0367338	0.0433033	0.0247031	0.0402607	0.0337757	0.0241355	0.0164581	0.0266828	0.142189	0.0283424	0.0269219	0.0262174	0.0237175	0.0194728
293	0.0761828	0.225555	0.216733	0.0256552	0.0339488	0.0196902	0.028263	0.0341441	0.0159525	0.0438211	0.0192069	0.0159172	0.0143982	0.0150874	0.125547	0.0230754	0.0235058	0.015088	0.0113707	0.0168577
294	0.0192111	0.306051	0.265971	0.0283673	0.0256507	0.014767	0.0203286	0.0270943	0.0199595	0.0272763	0.0113227	0.0103623	0.011596	0.0202443	0.117284	0.0202876	0.01564	0.0115541	0.00852678	0.018506
295	0.027188	0.317994	0.24365	0.0291996	0.0528037	0.014773	0.0143038	0.0213026	0.0147063	0.01279	0.0104367	0.00862449	0.055132	0.0123486	0.108626	0.0134199	0.0130978	0.0101902	0.00734003	0.0120736
296	0.0457295	0.302734	0.218315	0.0384833	0.0470919	0.0250072	0.0179521	0.0298616	0.0102101	0.0133475	0.0354117	0.0125305	0.0176691	0.0147924	0.0916317	0.0148374	0.0211279	0.00990829	0.0218034	0.0115552
297	0.0588934	0.301015	0.210675	0.0227622	0.0453569	0.0231757	0.0161896	0.0235359	0.0144854	0.0341538	0.0214092	0.0182069	0.0127085	0.0295668	0.0789471	0.0124851	0.0242174	0.0142029	0.0262881	0.0117243
298	0.0418243	0.340922	0.242688	0.0200944	0.0501784	0.0193874	0.017533	0.0138319	0.0117438	0.0764263	0.0135064	0.00763526	0.00604369	0.0221143	0.0580573	0.00648316	0.0165569	0.0102888	0.0181758	0.00650934
299	0.0125348	0.370672	0.269394	0.000312012	0.000923048	0.000350693	0.000602955	0.00697848	0.0304338	0.185073	0.0413763	0.0100271	0.000223847	0.025566	0.0141541	0.023518	0.00194443	0.00112958	0.00296943	0.00181649
300	0.0115573	0.427563	0.297836	0.00075849	0.00506811	0.000587068	0.0012031	0.00784177	0.00167835	0.147123	0.00869099	0.00256722	7.33807e-05	0.040606	0.0124201	0.0235161	0.00169407	0.00103446	0.00383158	0.00434956
301	0.0329727	0.468587	0.298409	0.00242241	0.00384112	0.00158996	0.00516579	0.00214051	0.00236789	0.102273	0.0064775	0.00225648	0.00110598	0.0056063	0.00669103	0.00790615	0.00147969	0.0105956	0.0354756	0.00263555
302	0.00805768	0.50998	0.283943	0.00150047	0.0093648	0.000570679	0.00103116	0.00345175	0.00431172	0.13862	0.00148817	0.000393371	6.8075e-05	0.00659535	0.0111427	0.016233	0.000800468	0.000243078	0.00051418	0.00169109
303	0.00600479	0.553621	0.28164	0.000662223	0.00161828	0.000421937	0.00113456	0.00124992	0.00122155	0.0895642	0.0192992	0.00117292	0.000107182	0.0249923	0.00778215	0.00404045	0.000573744	0.000733539	0.00283512	0.00132527
304	0.00925507	0.587685	0.245987	0.00371516	0.0022496	0.00110362	0.00153194	0.00549243	0.00123279	0.041586	0.00514597	0.00797366	0.000427551	0.0494109	0.0131448	0.00659957	0.00202223	0.00168335	0.00393589	0.00981692
305	0.119792	0.102149	0.126705	0.0314582	0.0581878	0.0307678	0.0647418	0.0297606	0.0208586	0.0183043	0.0114751	0.0169771	0.0218097	0.0234239	0.155499	0.0671116	0.0373776	0.0212626	0.0128118	0.0295269
306	0.143156	0.122349	0.144348	0.0255318	0.0537681	0.0268357	0.055845	0.0247402	0.0209528	0.0195712	0.0172009	0.0171036	0.0115368	0.0223361	0.157606	0.0457857	0.0299718	0.0229684	0.0168033	0.0215902
307	0.106031	0.157455	0.166598	0.0204208	0.0435119	0.0253844	0.0412841	0.0227264	0.0266972	0.0269125	0.030307	0.0163429	0.00986231	0.0204693	0.122449	0.0398836	0.0272862	0.0363228	0.0344928	0.0255626
308	0.0769334	0.21171	0.213241	0.0245399	0.0239224	0.0197359	0.0291922	0.0260111	0.0238478	0.0337474	0.0239032	0.013727	0.0141133	0.0164044	0.110151	0.0368639	0.0258152	0.0237473	0.0271939	0.0251999
309	0.0452908	0.307477	0.28195	0.0179622	0.0154105	0.0110571	0.0165791	0.0322783	0.015181	0.0250496	0.0194109	0.00913595	0.00811583	0.0145802	0.108102	0.0175443	0.0222926	0.00889347	0.00944555	0.0142436
310	0.0247956	0.41412	0.36369	0.0321966	0.0161085	0.00601974	0.00837661	0.00722248	0.00225744	0.00464541	0.00561672	0.00133542	0.000288624	0.00298504	0.0933229	0.00564113	0.00661849	0.000825152	0.00114642	0.00278818
311	0.0384362	0.425412	0.326098	0.0457402	0.0289194	0.010297	0.00525187	0.0108573	0.00482484	0.00453981	0.00710314	0.00294221	0.00147294	0.00339222	0.0659265	0.00477652	0.0065107	0.00182191	0.0022591	0.00341853
312	0.0506392	0.400771	0.276929	0.036473	0.0269956	0.0221198	0.0179209	0.0159007	0.00481288	0.011566	0.0184071	0.00528648	0.0044755	0.00520792	0.057891	0.00975571	0.00876878	0.00667954	0.00846497	0.0109351
313	0.0453121	0.374116	0.248637	0.0105241	0.0208343	0.0097204	0.0073317	0.0129417	0.0105511	0.066166	0.0168704	0.0207797	0.00714359	0.0244444	0.0519402	0.0125575	0.0155401	0.0102538	0.019492	0.0148442
314	0.0231149	0.405033	0.287644	0.0114792	0.0161132	0.00797553	0.0155179	0.00985267	0.0182038	0.0900389	0.00613026	0.00258515	0.00220782	0.0210918	0.0561203	0.00811838	0.00921536	0.00291865	0.00370857	0.00293053
315	0.00885245	0.429125	0.30265	0.00124717	0.00114201	0.00121779	0.0027035	0.00311538	0.00510814	0.137139	0.0258796	0.00192862	0.000620912	0.0407584	0.0114951	0.0139032	0.00180916	0.00192391	0.0045014	0.00487932
316	0.00853996	0.451111	0.321047	0.000699413	0.0026883	0.000269302	0.000995764	0.000943544	0.0008881	0.148782	0.00157634	0.000161982	1.28569e-05	0.0241309	0.0248151	0.010969	0.000464452	0.000131898	0.000462742	0.00130949
317	0.0132758	0.470821	0.300407	0.00905813	0.00935863	0.00411917	0.00217456	0.00354161	0.000905832	0.129633	0.0180884	0.000956536	7.90899e-05	0.00340363	0.0153134	0.00246429	0.00229759	0.000207195	0.00947716	0.00441788
318	0.0117286	0.479318	0.27941	0.000921516	0.00577095	0.00108629	0.00158203	0.00300849	0.00168917	0.136994	0.0320206	0.000921755	0.0173505	0.00497385	0.010128	0.00368691	0.00151306	0.000991234	0.00459042	0.00231525
319	0.00279436	0.544652	0.307143	0.0023433	0.00360772	0.000709825	0.00112812	0.00311425	0.000994338	0.0829411	0.0159541	0.00037997	0.000107579	0.0229461	0.00405351	0.00266662	0.000684186	0.00028141	0.000593738	0.00290535
320	0.000396978	0.509678	0.234764	0.000549773	0.00107651	0.000244833	0.0002599	0.00478429	0.00105414	0.156349	0.0402821	0.000496869	0.0116545	0.0338682	0.00189464	0.000836196	0.000414332	0.000220937	0.000614876	0.000559629
321	0.118478	0.0993667	0.146699	0.0236639	0.0565003	0.0275452	0.033653	0.0341581	0.0372664	0.0171146	0.0100149	0.0101928	0.0465329	0.0170989	0.145626	0.0606763	0.0400333	0.0248668	0.0180845	0.0324289
322	0.126051	0.152155	0.168734	0.0177205	0.0625045	0.0303251	0.032417	0.0364465	0.029466	0.0122867	0.0209069	0.0135319	0.0152175	0.0125723	0.117769	0.0408486	0.0261409	0.0343752	0.0243088	0.0262219
323	0.076678	0.205385	0.193148	0.0216637	0.0473533	0.0321848	0.0347673	0.016564	0.0172856	0.0170645	0.0343547	0.0150451	0.0131434	0.0179166	0.0844817	0.0345125	0.0199394	0.042959	0.0495901	0.0259638
324	0.0882752	0.272844	0.232823	0.021428	0.0196973	0.017469	0.0140987	0.0126423	0.0118138	0.0237322	0.0264074	0.00995585	0.0077315	0.0110083	0.0568462	0.0224271	0.0190955	0.0395151	0.0681407	0.0240492
325	0.0331393	0.385345	0.329223	0.0129327	0.0128595	0.00755839	0.00737457	0.015644	0.00819293	0.0223868	0.0187241	0.00619875	0.0035698	0.0102615	0.0576641	0.0113315	0.0176605	0.0111031	0.0186693	0.0101612
326	0.0192031	0.477572	0.410275	0.00715679	0.0140479	0.00208001	0.00763477	0.00344023	0.000326584	0.00218902	0.0093372	0.000443149	0.000110271	0.00171279	0.0324282	0.0021273	0.00180626	0.000756376	0.00643583	0.000917788
327	0.00535958	0.519647	0.42557	0.0209954	0.00248633	0.000384788	0.000913848	0.000650394	0.000195512	0.00180169	0.00115115	0.000127593	1.64107e-05	0.00584833	0.0129563	0.000745851	0.000578181	6.41394e-05	0.000211407	0.000296471
328	0.00301237	0.468667	0.320821	0.0168746	0.00626513	0.00151852	0.00426748	0.00262746	0.000864551	0.0309856	0.0624411	0.00133961	0.00840058	0.00340617	0.0315968	0.00257591	0.00244095	0.00186843	0.0229427	0.00708431
329	0.00627194	0.418877	0.254992	0.00179087	0.00268745	0.000815007	0.00120866	0.0118155	0.0134754	0.147111	0.0274705	0.0142997	0.000979565	0.0199648	0.0120959	0.039019	0.00378466	0.00433282	0.00453687	0.0144724
330	0.00568508	0.446691	0.308036	0.00553908	0.0248695	0.0060513	0.00306224	0.00858546	0.00806411	0.122225	0.0104923	0.00118542	0.000488369	0.00462957	0.0279452	0.00724233	0.00324047	0.00112005	0.00196788	0.00287931
331	0.00792587	0.458712	0.31442	0.000529071	0.00329787	0.000533887	0.000564688	0.000782808	0.00231213	0.124399	0.00674586	0.000989671	0.00017157	0.0311206	0.00389905	0.00308442	0.000591371	0.00256732	0.0157667	0.0215861
332	0.00842912	0.454131	0.294621	0.000377049	0.00200114	0.00117011	0.000711988	0.00550497	0.00103589	0.136427	0.018431	0.00133403	0.0400509	0.00398207	0.0197551	0.00504388	0.0018784	0.000893439	0.00263597	0.00158564
333	0.0115998	0.440558	0.272942	0.000902794	0.00134594	0.000397949	0.000875149	0.00418331	0.00203766	0.168186	0.0533947	0.00173668	0.0173733	0.00421066	0.00571104	0.00229492	0.000776569	0.000923669	0.00874645	0.00180247
334	0.00918116	0.440213	0.250904	0.00053824	0.000898249	0.000315459	0.000834018	0.00142343	0.00278159	0.161894	0.0684611	0.000651551	0.0001384	0.0271798	0.00420889	0.00190749	0.000566563	0.00140947	0.0244718	0.00202177
335	0.00472385	0.445516	0.224394	0.000601367	0.00156839	0.000938123	0.000718016	0.00124014	0.00449582	0.192335	0.0560384	0.0022471	0.000536114	0.0266729	0.00339501	0.00229076	0.00173921	0.00259622	0.0250611	0.00289226
336	0.0802937	0.23201	0.224947	0.0152522	0.0562818	0.027783	0.0354456	0.0208031	0.0244724	0.0313307	0.0196532	0.0151537	0.0089855	0.0140173	0.0783324	0.0292172	0.0198252	0.026872	0.0209431	0.0183807
337	0.0677757	0.279238	0.242028	0.0119337	0.0431472	0.0204046	0.0190297	0.0188044	0.0163772	0.0187252	0.0296833	0.0158382	0.00698565	0.0155497	0.0686178	0.0286564	0.0146897	0.0285018	0.0364885	0.0175256
338	0.0429387	0.359988	0.301116	0.0118081	0.0334676	0.0170593	0.0249552	0.0130387	0.00498592	0.015187	0.0138276	0.00496784	0.00498707	0.00958503	0.0523579	0.0170951	0.0119886	0.0182432	0.0310581	0.0113454
339	0.00532623	0.49505	0.394547	0.0063359	0.00269737	0.00133817	0.00208994	0.00104836	0.00155564	0.0159791	0.00800957	0.00140353	0.000220341	0.0175446	0.00886003	0.00417928	0.00154441	0.013005	0.0133112	0.00595474
340	0.00709549	0.543967	0.431549	0.00025574	0.000342224	0.000128011	0.000154019	0.00021359	0.000140998	0.00317271	0.000240834	5.01617e-05	4.83648e-06	0.0106982	0.00124739	0.000361858	0.000129256	4.01993e-05	7.97032e-05	0.000129314
341	0.00510424	0.544921	0.439895	0.000964091	0.000762387	0.000290378	0.000621903	0.000400391	0.000147839	0.00057577	0.000538651	0.000122066	3.84921e-05	0.00254562	0.00192094	0.000399752	0.00030465	9.61124e-05	0.000176226	0.000174203
342	0.00266288	0.464055	0.314501	0.00122737	0.00136275	0.000990909	0.000820979	0.00174098	0.000946268	0.152165	0.00448011	0.000902306	0.000202241	0.0342034	0.00731555	0.00792764	0.00129905	0.000808445	0.000979117	0.00140996
343	0.00381098	0.4624	0.327177	0.00134471	0.00221135	0.000729181	0.00224582	0.00643106	0.00468212	0.1153	0.0081443	0.00267459	0.00158573	0.0289667	0.0166322	0.00272665	0.00282742	0.00259179	0.00386545	0.00365311
344	0.00447359	0.518188	0.36745	0.0010255	0.0158374	0.00138135	0.00225562	0.00169938	0.000832436	0.0624433	0.00178298	0.00102602	0.000296249	0.0030075	0.00949027	0.00309788	0.000950779	0.000632396	0.000769388	0.00336015
345	0.00987507	0.529428	0.343637	0.00179667	0.00127486	0.000540192	0.00147607	0.000811752	0.000449612	0.0892699	0.00360026	0.00108614	0.000230861	0.00311227	0.00523137	0.00173117	0.000447523	0.00158895	0.00354305	0.000869469
346	0.0284211	0.319178	0.305037	0.0151798	0.0189423	0.0094251	0.00973471	0.0157381	0.0117776	0.00756234	0.00770881	0.0146286	0.00678574	0.0314111	0.0738489	0.041011	0.0347155	0.0136409	0.00995252	0.0253008
347	0.00350284	0.396333	0.345065	0.00790205	0.0111054	0.00455949	0.00735446	0.00899076	0.0196319	0.00452484	0.0303199	0.00761589	0.00306442	0.00897093	0.0570536	0.042326	0.0139697	0.00755237	0.0073034	0.0128545
348	0.0573869	0.442746	0.358882	0.00539476	0.0125405	0.00480025	0.00528433	0.00876393	0.00622638	0.00379412	0.0137183	0.00362642	0.003517	0.00936837	0.0244036	0.0160006	0.0107505	0.00346706	0.0041423	0.00518747
349	0.00347094	0.539981	0.407404	0.000760511	0.000436653	0.000224789	0.000394098	0.000464371	0.0012346	0.018967	0.0207485	0.00049405	4.84892e-05	0.00063286	0.00255225	0.000519136	0.000346316	0.000326949	0.00046465	0.00052917
350	0.00275398	0.556976	0.433561	0.00019815	0.000219922	5.34267e-05	6.18321e-05	0.000144793	6.99882e-05	0.0025559	0.00153391	3.76716e-06	2.12066e-10	0.000550489	0.00107119	0.000135749	4.00877e-05	2.54307e-06	3.51647e-05	3.16013e-05
351	0.0126521	0.552695	0.423022	0.00076075	0.00188772	0.000377184	0.000657852	0.00051472	0.000149707	0.00198296	0.000479886	0.000316189	4.44365e-05	0.000730963	0.00169911	0.00070318	0.000251846	0.000213152	0.000314361	0.000547146
352	0.0366542	0.438231	0.323528	0.00101562	0.00925233	0.00205106	0.00657639	0.00231799	0.00739692	0.131131	0.00503903	0.00517261	0.000511451	0.0038742	0.0128857	0.00227593	0.0032034	0.00152786	0.00270416	0.00465084
353	0.00712671	0.495153	0.352342	0.000941597	0.00297845	0.000920327	0.00242507	0.000495299	0.000728231	0.10382	0.00308695	0.00566733	0.000158861	0.0137479	0.0035916	0.0016405	0.00109828	0.00113417	0.00159739	0.00134728
354	0.00227119	0.51034	0.41522	0.00363134	0.00088573	0.00103771	0.00143114	0.00193741	0.00293041	0.00255608	0.00599711	0.0024201	0.000539036	0.00591363	0.0227501	0.0105866	0.00276789	0.00191136	0.00158304	0.00328994
355	0.0102491	0.51426	0.402626	0.00315093	0.00161187	0.00280146	0.00416529	0.00484064	0.00184156	0.00268991	0.00297992	0.00183166	0.0120835	0.00603483	0.0111363	0.0101302	0.00205864	0.00149212	0.00156697	0.00244887
356	0.00547955	0.566862	0.40369	0.00163972	0.000795532	0.000567334	0.000596624	0.000489536	0.000454668	0.00129035	0.001464	0.000313733	8.7058e-05	0.000822881	0.013169	0.000603943	0.000547083	0.000229323	0.000405656	0.000491875
357	0.00668351	0.578232	0.405962	0.00043111	0.000683092	0.000117799	0.000201925	0.000328561	7.03211e-05	0.0025753	0.00203053	3.60927e-05	3.12345e-06	0.000383936	0.00155245	0.000300489	0.00011189	2.60434e-05	0.000113971	0.000155285
358	0.0177524	0.54332	0.396188	0.00207128	0.00102996	0.00132236	0.00184083	0.00233664	0.00133061	0.0042976	0.00234709	0.00245427	0.000513898	0.00164628	0.00312797	0.00306319	0.00134901	0.00477926	0.00473227	0.00449692
359	0.0146654	0.0206408	0.0202715	0.0131812	0.181	0.0208477	0.0307195	0.0636908	0.0982789	0.0827771	0.0346362	0.0213729	0.0487277	0.0470532	0.110357	0.0443405	0.0456521	0.0191978	0.0617981	0.0207913
360	0.0213516	0.011679	0.0132579	0.0228007	0.213058	0.0301067	0.02805	0.051555	0.0762362	0.0958764	0.0138766	0.020539	0.0500855	0.0313228	0.0982988	0.0471743	0.0429494	0.0324357	0.0397458	0.0596006
361	0.0133366	0.0228308	0.0272722	0.0404455	0.274877	0.0597963	0.0564322	0.0230678	0.0552512	0.0488133	0.00415727	0.0250633	0.0247827	0.0249452	0.0420778	0.0599477	0.040609	0.0434602	0.0248866	0.0879472
362	0.0174188	0.0144732	0.0271105	0.0687226	0.371301	0.0971313	0.0733746	0.0138908	0.0395775	0.0292988	0.00506256	0.0280949	0.0236902	0.00715599	0.0080647	0.0197695	0.0304857	0.0212684	0.042082	0.0620267
363	0.00872779	0.00298582	0.00338299	0.00802237	0.301351	0.0267584	0.00765335	0.00439293	0.0873928	0.0880702	0.0166069	0.0502684	0.0714649	0.0269639	0.0244842	0.0686031	0.00731188	0.044596	0.0807531	0.0702101
364	0.01157	0.520165	0.386767	0.00370874	0.00620958	0.00480972	0.00257125	0.00365487	0.00148277	0.00229335	0.00669311	0.00473888	0.00064182	0.00298407	0.0224865	0.00623876	0.00568013	0.00173858	0.00192156	0.00364372
365	0.00355001	0.561191	0.383694	0.001729	0.0016397	0.00131099	0.00138499	0.00267486	0.00115076	0.00421182	0.00286658	0.000650793	0.000300748	0.0188033	0.00864142	0.00214749	0.00154317	0.000494874	0.000909463	0.00110513
366	0.0115943	0.56549	0.363748	0.00103843	0.000699945	0.000385196	0.000526913	0.000931583	0.000680617	0.00235952	0.0211938	0.00150201	0.000148132	0.0224709	0.00322014	0.000972648	0.000906542	0.000486749	0.000732945	0.000911597
367	0.027703	0.0244639	0.0266982	0.0267131	0.155282	0.0292064	0.0323619	0.0716195	0.0962955	0.0380702	0.0185847	0.0175668	0.0792458	0.0232659	0.122194	0.0745805	0.0435305	0.0254234	0.0286611	0.0385337
368	0.0131157	0.0195225	0.0175307	0.0136723	0.178503	0.0187061	0.0229215	0.0501812	0.106992	0.0881317	0.0347381	0.0347081	0.0643181	0.0379172	0.106463	0.0621488	0.0467317	0.0158154	0.033599	0.0342839
369	0.00145526	0.0196789	0.0200487	0.03102	0.241783	0.0504586	0.0568297	0.051976	0.0717272	0.0520069	0.025537	0.0226685	0.0563055	0.0364457	0.0873066	0.0465109	0.036798	0.0210676	0.0292117	0.0411642
370	0.0293002	0.0282723	0.0188226	0.0465686	0.314322	0.0764188	0.0791525	0.0203265	0.0363894	0.0184317	0.0143836	0.0239181	0.0266894	0.0275638	0.0582084	0.0511374	0.0334626	0.0201527	0.0335694	0.0429104
371	0.0188684	0.00623812	0.00851954	0.052197	0.392862	0.110433	0.0817624	0.01111	0.0430949	0.0641518	0.00561656	0.0206757	0.00655301	0.0206398	0.0289157	0.0201378	0.0163725	0.0171329	0.035321	0.0393979
372	0.000386896	0.0169005	0.00413975	0.0927109	0.48439	0.161209	0.11338	0.0104791	0.00140397	0.000692284	0.00135453	0.00352188	0.000855597	0.00430517	0.00444685	0.00285408	0.0452105	0.00423513	0.00621658	0.0413073
373	0.0249468	0.0101983	0.00766323	0.0071929	0.0251283	0.00910528	0.0130469	0.0160164	0.126021	0.325697	0.0593093	0.0344649	0.032091	0.0291636	0.0205744	0.037619	0.00838341	0.0160075	0.174995	0.0223762
374	0.0252198	0.00288985	0.00320617	0.0024222	0.0365159	0.00733752	0.0131817	0.0186115	0.153935	0.419028	0.0214952	0.017436	0.00952282	0.0223818	0.0385265	0.0392983	0.0101589	0.00849545	0.13607	0.0142675
375	0.0361612	0.0172658	0.0173799	0.01936	0.172431	0.0306918	0.0367794	0.0584636	0.08595	0.0619676	0.0190505	0.0192282	0.0697992	0.0293999	0.123385	0.077082	0.0359201	0.0266495	0.030017	0.0330182
376	0.0230154	0.0233315	0.0253589	0.0168087	0.192377	0.0265404	0.0303794	0.0447483	0.095101	0.075383	0.022126	0.0300146	0.0775379	0.0349567	0.105467	0.0623425	0.0321553	0.0205657	0.0319072	0.0298839
377	0.0173481	0.0313832	0.0353914	0.036413	0.272994	0.0642964	0.0736096	0.0273729	0.0637266	0.027708	0.0187975	0.0205723	0.077997	0.0385624	0.0927655	0.0216786	0.0289544	0.0115359	0.0224	0.016493
378	0.0237105	0.0187324	0.0303616	0.0435054	0.318347	0.0764445	0.0862823	0.0200676	0.0601056	0.0208793	0.0158604	0.019402	0.0402512	0.0194557	0.0650269	0.0458952	0.0374455	0.0163207	0.0234074	0.0184987
379	0.00601654	0.00786491	0.00657939	0.088298	0.436155	0.15037	0.141009	0.035012	0.00336513	0.00152341	0.00233616	0.00309638	0.00864675	0.00509233	0.016266	0.0223908	0.0340472	0.0034679	0.00499217	0.0234712
380	0.0779806	0.0282577	0.00740986	0.00248945	0.0579608	0.00928918	0.0040554	0.069161	0.104221	0.217445	0.0281025	0.0250655	0.0164803	0.00793879	0.0460771	0.0339723	0.0117834	0.0262179	0.168068	0.058025
381	0.0170831	0.00151023	0.000838743	0.000569499	0.011174	0.00122882	0.000736309	0.0180409	0.0679	0.256378	0.119291	0.0723152	0.0215105	0.0075754	0.00493935	0.0401966	0.00346755	0.0544165	0.231815	0.069014
382	0.00418185	0.00107231	0.0019507	0.000661642	0.00434066	0.00110245	0.00106282	0.00533478	0.180898	0.309674	0.06958	0.0270647	0.0105649	0.02715	0.00779286	0.0541137	0.00349747	0.0243449	0.202777	0.0628358
383	0.0266312	0.00983966	0.00904617	0.00679947	0.0551845	0.0135321	0.0303898	0.0587806	0.173617	0.363721	0.00831479	0.00668362	0.0124072	0.00924615	0.0233776	0.0605413	0.013875	0.00757752	0.0905184	0.0199168
384	0.0184538	0.0194606	0.0240899	0.017626	0.17042	0.0227428	0.0294967	0.0769824	0.102814	0.115418	0.00908429	0.0160987	0.0643964	0.04163	0.106954	0.0690541	0.0285116	0.0178951	0.0201597	0.0287126
385	0.0239794	0.0139788	0.0164689	0.0126456	0.196425	0.0280655	0.0343322	0.0616809	0.0813244	0.114271	0.0230173	0.0300534	0.0712271	0.0508659	0.0897615	0.0548833	0.0220899	0.0152565	0.0353792	0.0242938
386	0.0182031	0.0273616	0.0297937	0.0213801	0.26297	0.0454903	0.0641826	0.0372233	0.0667543	0.0564777	0.0133079	0.018517	0.0983689	0.0347318	0.0942197	0.0373627	0.0206561	0.0175019	0.0171233	0.0183743
387	0.0214501	0.0272851	0.0261713	0.02914	0.323775	0.0724532	0.100778	0.0373066	0.0474013	0.0221958	0.0163041	0.0180762	0.045068	0.0189252	0.0502903	0.0406891	0.0237091	0.0213791	0.0215581	0.0360439
388	0.0542832	0.0497555	0.0237861	0.0463224	0.351012	0.0970469	0.109377	0.0390099	0.024859	0.0125411	0.0105214	0.0199636	0.0264244	0.0138235	0.0315865	0.0191886	0.0312665	0.0122646	0.0106801	0.0162872
389	0.0849019	0.00109265	0.000947845	0.00107434	0.0120903	0.00487618	0.00112827	0.0511478	0.169022	0.257157	0.0369422	0.0337667	0.0345911	0.0235799	0.0124472	0.032761	0.00304816	0.0128994	0.189295	0.0372311
390	0.0354786	0.000807478	0.000465863	0.000732334	0.00545039	0.00145418	0.000952292	0.0142292	0.129098	0.244237	0.0950568	0.0534919	0.0598157	0.00868077	0.00214938	0.0272132	0.00383974	0.0232009	0.226873	0.0667739
391	0.00630127	0.00614793	0.00254331	0.00438447	0.0558003	0.0226528	0.038851	0.0261553	0.188371	0.306471	0.0232303	0.0422652	0.0599128	0.0168903	0.00597376	0.0141552	0.0107662	0.00808906	0.130223	0.0308156
392	0.00630152	0.00215902	0.0031844	0.0014654	0.00891489	0.00363541	0.00432029	0.0215386	0.2407	0.357345	0.013098	0.0282743	0.0368121	0.0231377	0.0310285	0.062321	0.00643188	0.0142906	0.0998991	0.0351414
393	0.0318919	0.0222265	0.0159435	0.0155783	0.161361	0.0135852	0.0357692	0.0830318	0.0717611	0.124791	0.0238312	0.0281877	0.0631143	0.0400793	0.0844679	0.0807544	0.0268012	0.0241943	0.024316	0.0283141
394	0.0142367	0.00936756	0.0179028	0.0100172	0.212542	0.0177535	0.0422913	0.0683956	0.0536858	0.118835	0.0248034	0.0356749	0.0626855	0.0419621	0.090765	0.0813642	0.0270086	0.0264846	0.0205655	0.0236591
395	0.0262383	0.00867067	0.00735993	0.0179431	0.290972	0.0505726	0.0754653	0.0348902	0.0383853	0.0981473	0.0189867	0.0206193	0.0624616	0.0311742	0.105865	0.0405848	0.0170861	0.0185446	0.0224849	0.0135481
396	0.00334261	0.0270705	0.0151107	0.0471386	0.367217	0.0996624	0.133597	0.0265512	0.0294581	0.00340404	0.00252545	0.00765516	0.0811829	0.0109063	0.0604603	0.0222981	0.0337005	0.00541091	0.00529902	0.0180092
397	0.000125369	0.00117519	0.00153699	0.204563	0.405368	0.322629	0.0141692	0.00294792	0.000580659	0.000584679	0.00332696	0.00317466	0.000393267	0.00156834	0.00136517	0.00128013	0.0143891	0.0026312	0.0146945	0.0034966
398	0.00507724	0.00580674	0.00474651	0.0717785	0.311278	0.207004	0.0081471	0.00841325	0.0206771	0.0641585	0.024095	0.0500258	0.0846005	0.0208442	0.00893586	0.0289699	0.0101944	0.0102495	0.0183618	0.0366358
399	0.0047329	0.00954544	0.0170127	0.0615586	0.283357	0.185939	0.0196141	0.00848712	0.00831688	0.0797309	0.029538	0.0780479	0.0926021	0.0105349	0.00656265	0.019566	0.00804902	0.02009	0.0224908	0.0342245
400	0.0159394	0.00112103	0.000853792	0.000529576	0.00444048	0.0013272	0.00129222	0.0224694	0.184801	0.292512	0.0444897	0.0468507	0.0735888	0.0471849	0.0045038	0.03871	0.00482009	0.00834805	0.168974	0.0372437
401	0.0151282	0.00508946	0.00314723	0.00115789	0.0325275	0.00358223	0.00382669	0.0549406	0.232074	0.357289	0.0123572	0.0379939	0.0188205	0.0408221	0.023155	0.0375712	0.00983105	0.0101249	0.0772985	0.0232635
402	0.00848131	0.00401123	0.0067693	0.00888533	0.0361974	0.0109759	0.00690398	0.0475282	0.204308	0.335206	0.014555	0.0485537	0.0535455	0.0307859	0.0104611	0.0524209	0.00990752	0.010445	0.0718661	0.0281922
403	0.0388819	0.0172168	0.0231978	0.0182787	0.22406	0.037733	0.0932967	0.0684415	0.0422246	0.0998075	0.0365184	0.0244982	0.0171717	0.0271816	0.0562086	0.0520967	0.0294675	0.0313601	0.0345204	0.0278388
404	0.0108828	0.0183179	0.0328141	0.0235941	0.237544	0.0468126	0.0987374	0.0907022	0.0382728	0.0897406	0.0183532	0.0284309	0.0200757	0.0159842	0.0654911	0.0580454	0.0224742	0.0332944	0.0255675	0.0248647
405	0.0149499	0.00935079	0.0095372	0.111367	0.29406	0.20515	0.0151914	0.0359631	0.0447139	0.0349737	0.0244024	0.0162883	0.0128839	0.0118979	0.0418121	0.0371434	0.0306389	0.012495	0.013632	0.0235486
406	0.00865712	0.00445735	0.0226591	0.0275598	0.184872	0.115407	0.00423276	0.0121912	0.0639641	0.133154	0.0505244	0.070742	0.0310108	0.039887	0.0459101	0.0566515	0.0138542	0.0229687	0.0522482	0.0390479
407	0.00993945	0.0156397	0.1259	0.0433171	0.142033	0.094161	0.00772408	0.016531	0.0460432	0.144236	0.0274168	0.0734153	0.0226758	0.0507973	0.05075	0.0600929	0.0182387	0.0114944	0.0153041	0.0242901
408	0.0159606	0.0179048	0.0092741	0.016837	0.108035	0.028561	0.0417267	0.0643563	0.162684	0.241928	0.0134465	0.035723	0.0225483	0.0263902	0.0435242	0.0512227	0.0198832	0.0163948	0.0443592	0.0192407
409	0.00996119	0.0115905	0.00695837	0.0127034	0.138293	0.0392238	0.0558	0.0419267	0.144023	0.226972	0.00631023	0.0173664	0.074047	0.00623621	0.044879	0.043408	0.03322	0.0116155	0.042094	0.033371
410	0.00401117	0.021193	0.0281186	0.0587862	0.338012	0.0961909	0.151981	0.0591571	0.0129792	0.0380241	0.00953565	0.0061043	0.016138	0.0125311	0.0524073	0.0412306	0.0307304	0.00782933	0.00765166	0.00738817
411	0.0160932	0.0206753	0.0241883	0.0263445	0.263189	0.0495676	0.0870088	0.0642098	0.0416	0.0726409	0.0399161	0.0370307	0.0621685	0.0216284	0.0403757	0.0480984	0.0184199	0.0256325	0.0229043	0.0183079
412	0.00844902	0.0202493	0.0399686	0.0661417	0.242946	0.159513	0.0431287	0.0365455	0.0452522	0.0449488	0.0112514	0.0287986	0.0126955	0.0139664	0.0665661	0.0288381	0.0402697	0.0223062	0.0260295	0.0421356
413	0.00956068	0.0151352	0.080948	0.0114237	0.112664	0.0556744	0.00541384	0.0313756	0.113114	0.160031	0.025986	0.0821065	0.0120978	0.0221198	0.0769632	0.0645156	0.0155345	0.0232634	0.0327839	0.0492887
414	0.00629034	0.0418239	0.239792	0.0370223	0.0428497	0.0417815	0.0115601	0.0126623	0.062654	0.151454	0.0344818	0.0797279	0.00457502	0.0178892	0.0791838	0.0532092	0.0118288	0.0271581	0.0160495	0.0280066
415	0.044801	0.0572395	0.0258649	0.0293379	0.137085	0.0523564	0.0550826	0.0456946	0.144991	0.169334	0.00700636	0.0137023	0.0154169	0.0123189	0.0178489	0.0365313	0.028734	0.0224126	0.056343	0.027899
416	0.00518706	0.0381608	0.0147102	0.0169607	0.176547	0.0545246	0.0723601	0.0475105	0.118686	0.175198	0.0166383	0.0208239	0.00770799	0.0129253	0.0258975	0.049886	0.0333776	0.0117231	0.0486446	0.0525313
417	0.000145029	0.00396426	0.00273701	0.0742349	0.436314	0.129374	0.170674	0.0628132	0.00222201	0.00162386	0.005014	0.00423244	0.00264482	0.00513781	0.0393033	0.0162863	0.0245473	0.00333998	0.00355222	0.0118398
418	0.0166765	0.0170363	0.0115426	0.0242032	0.439952	0.0488944	0.152507	0.0508597	0.0133083	0.00603684	0.00963083	0.0210328	0.024698	0.0125559	0.0272538	0.0259596	0.013576	0.0215479	0.0215061	0.0412225
419	0.0105175	0.0159098	0.0143786	0.0178959	0.486472	0.0638631	0.184246	0.0372527	0.00693919	0.00812424	0.0104838	0.0131504	0.0138117	0.00617656	0.0214032	0.025355	0.0154395	0.0173768	0.0129652	0.0182382
420	0.00324126	0.010726	0.00544521	0.0111718	0.48877	0.048896	0.161561	0.0443082	0.031644	0.0356451	0.00931448	0.0170334	0.00858944	0.0110483	0.0211521	0.019246	0.00855688	0.0115452	0.0200936	0.0320119
421	0.00128954	0.00218418	0.0038052	0.100886	0.51361	0.219302	0.00797537	0.00563795	0.00249882	0.00222355	0.010758	0.00285708	0.0017713	0.0825891	0.00230241	0.00340237	0.0289036	0.00242904	0.002675	0.00289999
422	0.0152866	0.0104001	0.0115542	0.0690379	0.518233	0.228342	0.0389919	0.0112897	0.00306847	0.00239492	0.00227152	0.00365936	0.0025298	0.00681226	0.00625911	0.00641591	0.045485	0.00469923	0.00343257	0.00983644
423	0.00887881	0.0220157	0.0175785	0.0224972	0.332835	0.147583	0.02575	0.0148374	0.0735197	0.0554599	0.0362741	0.0258883	0.0505627	0.0225397	0.0423543	0.0300898	0.0154325	0.013712	0.0153248	0.0268669
424	0.00116001	0.0265816	0.0470143	0.0233803	0.28277	0.128256	0.0424389	0.0203215	0.0493073	0.0219176	0.0327378	0.040452	0.0701853	0.0232941	0.0694199	0.0337628	0.0298683	0.0156903	0.0108855	0.0305563
425	0.028509	0.0361011	0.073664	0.0423555	0.244552	0.137382	0.0582434	0.0332026	0.0493481	0.0294683	0.011485	0.018733	0.020372	0.0152256	0.0753292	0.0325438	0.0443182	0.0126664	0.00896248	0.0275386
426	0.0663055	0.0472298	0.115841	0.0339044	0.137455	0.0753165	0.0370226	0.0357062	0.0590039	0.069173	0.0217639	0.0358536	0.0201846	0.0230726	0.0714622	0.0406218	0.0334285	0.023501	0.0249859	0.0281678
427	0.0280197	0.0722442	0.192067	0.0401739	0.0826069	0.0613327	0.036702	0.0272804	0.0567917	0.0755232	0.0274179	0.0542445	0.0171697	0.0224745	0.0753288	0.0345782	0.0284519	0.0231021	0.0207656	0.0237255

## Sheet: S4
Supplementary Table S4: Niche effect on cell type-specific gene module in the PDAC dataset
Niche	Acinar_cells	Cancer_clone_A	Cancer_clone_B	Ductal_APOL1_high-hypoxic	Ductal_CRISP3_high-centroacinar_like	Ductal_MHC_Class_II	Ductal_terminal_ductal_like	Endocrine_cells	Endothelial_cells	Fibroblasts	Macrophages_A	Macrophages_B	Mast_cells	Monocytes	RBCs	T_cells_&_NK_cells	Tuft_cells	mDCs_A	mDCs_B	pDCs
niche1	0.000833267	0.0140225	-0.00434207	0.000753836	0.00140302	0.000244964	-0.000630052	0.000396152	5.22363e-05	0.00707506	0.000221875	-0.00028788	-0.000156952	-0.000619295	3.58407e-05	0.00036406	0.00032587	-0.000340828	-7.12605e-05	0.000163908
niche2	-0.00457502	0.259856	0.252977	0.00167171	0.00609084	0.000472469	0.00407043	0.00351369	0.00334184	0.14445	-0.00684662	-0.00458354	4.79073e-05	-0.000626702	0.00140047	0.000473118	0.00347298	-0.00434143	0.000148981	-0.00285647
niche3	0.0902234	0.603325	0.548997	0.0358193	0.245626	-0.00568723	-0.120497	-0.134717	-0.130139	0.113414	0.00111845	-0.164058	-0.281815	-0.0685887	0.203035	-0.106283	-0.0564234	-0.23267	-0.131748	-0.144892
niche4	0.0456512	0.347144	0.296253	-0.136798	-0.241165	-0.140252	-0.0541963	-0.00843321	0.0964928	0.378527	0.0349215	0.0404514	0.00276101	0.106038	-0.0955782	0.101886	-0.0267342	-0.0221259	-0.00237396	0.0144892
niche5	0.137293	0.347618	0.351516	0.00932296	0.0717362	0.001965	-0.0232867	-0.0396247	-0.0552331	0.146072	0.048481	-0.074614	-0.104523	0.0355406	0.0425913	-0.0174127	-0.030244	-0.0901234	-0.0179936	-0.0826987
niche6	0.155754	-0.350272	-0.473792	-0.297418	0.192779	-0.0914684	-0.178181	0.0941932	0.269563	0.276288	0.0727697	0.00837657	-0.0326636	-0.0337919	-0.0786358	0.0571578	-0.107621	0.0655598	0.396813	0.202993
niche7	0.233157	-0.300241	-0.353312	-0.243322	0.71118	0.0612252	-0.184251	-0.0315235	0.184379	0.100746	-0.0930026	-0.0435546	-0.106896	-0.206307	0.0305296	0.0391183	0.0937764	-0.0412047	0.113897	0.169621
niche8	0.117515	0.802228	0.720379	0.0406213	0.00146128	-0.139046	-0.0756068	-0.172548	-0.168727	0.17219	-0.0671161	-0.231163	-0.261492	-0.0334605	0.259046	-0.0550886	-0.0818314	-0.160419	-0.185981	-0.170285
niche9	0.0677073	-0.187342	-0.214485	0.0464089	0.491029	0.195	-0.0345628	0.162228	0.0268135	-0.068	-0.0563626	0.0272876	0.073683	-0.108803	-0.167797	-0.0145258	0.0817544	0.000267459	0.0515784	0.104986
niche10	0.0469856	0.418558	0.293705	-0.0384237	-0.170597	-0.0119972	-0.0919053	-0.0525968	0.0329792	0.283653	0.0215787	-0.0342166	-0.0518162	-0.00944483	-0.00588269	-0.0490285	-0.0826979	-0.0505129	-0.0399526	-0.121074
niche11	0.221092	-0.44379	-0.400546	-0.232113	0.437496	0.0902786	-0.0372085	0.129842	0.137077	0.0499197	-0.0466859	-0.10279	-0.146645	-0.179955	-0.142386	-0.0249419	0.0907037	0.0253998	0.218083	0.209211
niche12	0.0637612	0.177575	0.0304754	-0.115655	-0.162679	-0.15044	-0.157024	-0.0469649	0.142115	0.389885	0.132562	0.049012	0.0123674	0.0687701	-0.0271544	-0.000355683	-0.0937848	-0.0536996	0.0241958	-0.0943917

## Sheet: S5
Supplementary Table S5: Marker gene list of the PDAC dataset
Cell Type	Marker
Acinar cells	CPA5, CPA2, CEL, SYCN, CUZD1
Cancer clone A	S100P, COL17A1, TM4SF1, PITX1, CLDN1
Cancer clone B	LY6D, COL6A2, COL6A1, CRABP2, KRT16
Ductal antigen-presenting	SPP1, APCS, SERPING1, WFDC2, AGT
Ductal centroacinar	CRISP3, REG1A, MMP1, REG3A, PIGR
Ductal high hypoxic	APOL1, IGFBP3, CLDN4, TACSTD2, RAP2B
Ductal terminal	TFF3, TFF2, AGR2, DPCR1, KRT8
Endocrine cells	SCG3, NEUROD1, STMN2, PCSK1, SCG5
Endothelial cells	ADGRL4, RAMP2, VWF, CLEC14A, ECSCR
Fibroblasts	THBS2, THY1, COL3A1, LUM, COL1A2
Macrophages A	MMP19, PLA2G7, FPR3, SDS, MS4A4A
Macrophages B	FCN1, MCEMP1, AQP9, LILRB1, SPI1
Mast cells	CPA3, SLC18A2, MS4A2, IL1RL1, HDC
Monocytes	FCN1, S100A8, FPR1, S1PR4, SELL
RBCs	HBA1, BRSK1, FOXJ1, TBKBP1, HBA2
T cells and NK cells	IL2RB, CD247, CD2, GZMA, CCL5
Tuft cells	SH2D6, BMX, TRPM5, SH2D7, RGS13
mDCs A	CX3CR1, VSIG4, CSF1R, MS4A7, C1QB
mDCs B	C1QC, C1QB, C1QA, CSF1R, SLCO2B1
pDCs	IRF4, JCHAIN, LILRA4, GZMB, PLD4
