# Supplementary material for: Deciphering Microenvironmental Heterogeneity by Scalable Niche Guided Module Discovery
Source: Research Square preprint supplement (doi:10.21203/rs.3.rs-7243521/v1), 2025-08-25
Supplement: Supplementary file 6 [file Supplementary Table S15-16.xlsx]

## Sheet: S15
Supplementary Table S15: Niche effect on gene module in the BRCA dataset
Module	CEACAM6_EGFR	MMP2_PECAM1	CDH1_EGFR	CXCL12_CXCR4	CXCL12_CD4	S100A8_CD69	C1QA_CD93	S100A8_CD68	CD274_CD80	S100A4_ERBB2	S100A4_EGFR	CXCL12_AVPR1A	CD86_CTLA4	PDCD1LG2_PDCD1	CD274_PDCD1	CXCL12_SDC4	CCL5_SDC4	EDN1_EDNRB
Module1	0.317276	0.0537224	-0.0193274	-0.078035	0.0380422	-0.00739884	0.00640327	0.0120343	-0.120095	0.101349	-0.150635	-0.0146538	-0.00391291	-0.0663001	-0.165849	0.104551	0.0589762	0.0841293
Module2	0.00355762	0.141712	-0.1058	0.0774411	0.419785	0.0460166	0.182323	0.43481	0.774419	-0.0473297	0.370227	-0.0318421	0.177419	-0.0805166	0.0933661	-0.0837169	0.0219743	-0.00505543
Module3	0.0922126	0.118858	0.181617	0.00997336	0.113866	-0.024088	0.067438	0.0256972	0.040452	0.0406472	0.545292	0.133941	0.057166	0.0181334	-0.0874798	0.0561622	0.0171325	0.0812486
Module4	-0.342757	-0.083484	0.877731	0.126206	-0.261575	-0.706046	-0.202829	-0.0813642	-0.454184	0.553104	-1.58294	0.00135738	-0.550168	-0.120995	-0.0366353	0.529962	0.384752	-0.676455
Module5	0.00973941	0.0677551	-0.151444	0.378991	0.200481	1.10431	-0.0242466	-0.119119	0.113311	-0.0255386	0.398963	-0.0138513	1.07013	0.296694	0.168647	-0.132757	0.0806662	0.146284
Module6	-0.0586857	0.0429887	-0.0663363	0.380554	0.138688	0.155114	-0.0108637	-0.0222626	0.485008	-0.0903236	0.287898	-0.0194536	0.651952	0.0989427	0.112728	-0.143349	0.0580022	-0.0136731
Module7	0.0148538	0.185127	-0.0944251	0.0112142	0.509955	-0.109043	0.327451	0.225456	0.0503687	-0.0605333	0.300179	-0.0192928	-0.100544	-0.114442	-0.148025	-0.0132714	-0.0357193	0.0380871
Module8	-0.0323869	0.106514	0.308321	0.0787337	0.0462073	0.0385851	0.0864284	0.108296	-0.0229683	0.211955	-0.0795548	0.0941356	0.0949932	0.0190863	0.0964916	0.175589	0.159117	-0.00691309
Module9	-0.0322641	0.701907	-0.046906	-0.030517	-0.00036596	0.0108061	0.98319	-0.391961	-0.0943831	-0.0484569	0.377226	0.677297	-0.00184621	-0.0292279	-0.0801581	-0.0414204	-0.07049	1.11613
Module10	0.0288259	0.378332	0.0152444	0.146195	0.214614	0.0129203	0.16185	-0.0467809	0.0523864	0.113666	1.07893	0.364358	0.114179	0.0342555	-0.00905251	0.0596894	-0.0640941	0.27957
Module11	0.428948	0.0969238	-0.0220242	-0.0676187	0.0713936	0.0391884	0.0912933	-0.0424915	0.0854653	0.0241206	0.407356	0.217405	-0.0140725	0.0345211	0.0675039	0.0078939	-0.0113346	0.212036
Module12	0.0392742	0.014486	0.346128	-0.00481004	-0.0701022	-0.157608	-0.0616021	0.0196266	-0.238052	0.244639	-0.590867	0.0191422	-0.136937	-0.0284698	-0.0489812	0.230219	0.142476	-0.145444
Module13	0.173798	0.396896	-0.251148	0.213081	0.376827	-0.0649421	0.0693501	-0.137029	-0.233722	0.0565571	1.27745	0.133573	-0.00974066	-0.0493315	-0.0154572	0.241407	-0.147051	0.457721
Module14	0.00360427	0.297802	-0.100095	0.110312	0.0642571	0.056387	-0.0958395	-0.0191484	-0.0269369	-0.0689729	0.37117	-0.00325472	0.0177416	0.0418377	0.0276344	-0.0411461	-0.0136552	0.0143433
Module15	0.293588	-0.120976	0.120709	-0.138316	-0.015311	0.312978	-0.0644765	0.393907	-0.00373111	-0.026345	0.262671	-0.164074	-0.0206065	0.0173658	0.00276436	0.00810314	0.096367	0.000246139
Module16	-0.0521192	0.0552015	0.167869	-0.0114106	-0.0274717	-0.0967903	0.01091	-0.0514472	-0.108473	0.0416807	-0.134432	0.0366044	0.00541913	-0.123504	-0.0323761	0.121547	0.0966534	-0.129379
Module17	0.668913	0.0325376	-0.132873	-0.108076	0.0424245	0.038633	-0.00982595	0.0749305	-0.188724	0.236444	-0.619696	-0.0500035	-0.056768	-0.0309071	0.0120037	0.194887	0.13367	0.0445051
Module18	0.369357	-0.0521563	0.43291	-0.0131852	-0.116688	-0.0688937	-0.188921	0.0221981	-0.319685	0.369711	-1.20135	-0.0658054	-0.387975	0.00628785	0.0517763	0.263506	0.212731	-0.342946
Module19	-0.00652414	0.156387	-0.0189013	-0.0026458	0.218482	-0.0857266	0.113821	0.78104	0.323199	-0.0187355	0.372939	0.00978958	0.141773	-0.0497064	-0.0383497	-0.0300184	0.0209222	-0.0919215
Module20	-0.000128232	0.123307	0.49453	0.130465	-0.0116182	-0.118795	0.0203186	-0.0388918	-0.197088	0.375375	-0.507628	0.0995467	-0.146638	0.0018995	-0.0691139	0.258322	0.126395	-0.163952

## Sheet: S16
Supplementary Table S16: Gene embeddings for each gene module in the BRCA dataset
Gene	Module1	Module2	Module3	Module4	Module5	Module6	Module7	Module8	Module9	Module10	Module11	Module12	Module13	Module14	Module15	Module16	Module17	Module18	Module19	Module20
ABCC11	-2.74516	-2.57755	-2.33343	4.2441	-2.83851	-2.89092	-2.16078	-1.10755	-1.26666	-2.47033	-3.83745	-0.926111	-0.389946	-2.47863	-3.39271	-0.0219569	1.64258	-1.70738	0.649985	-0.817192
ACTA2	2.2877	-0.21027	-0.864592	1.57203	0.522112	-0.781188	-0.166944	4.99754	3.61868	5.08167	5.14595	0.910014	-1.82965	-0.868181	-1.92993	0.712409	-0.169719	1.22323	-0.344602	1.37795
ACTG2	4.20856	4.23985	0.657707	2.93793	3.49085	3.6331	2.47967	3.61601	2.0799	3.32463	4.69767	3.34594	1.01903	1.925	1.86088	2.7023	2.45974	2.45642	2.43266	4.54083
ADAM9	0.0126193	-1.08773	4.20602	2.8617	-1.65761	-1.47627	3.31173	1.17785	1.92244	3.29822	-0.490687	3.44842	1.32369	-1.09192	2.77825	3.96633	-0.0773058	4.28255	3.06599	2.37217
ADGRE5	-1.22277	2.91535	-0.520289	-4.84359	3.84324	2.06737	1.91699	-2.83215	1.49674	1.36064	0.144288	-3.1676	-0.0791323	3.03857	0.410701	-2.74455	-0.522725	-3.48038	-2.32099	-3.4193
ADH1B	-4.1194	-1.57143	-4.17461	-5.28847	-2.37671	-2.21254	-0.977336	-4.07577	-0.0885313	-3.87641	-4.54449	-4.39314	2.87962	-3.72508	-4.65024	-4.34825	-4.58355	-4.65967	-4.67908	-4.54815
ADIPOQ	-3.93871	-3.12541	-4.31252	-4.6968	-4.64933	-3.872	-2.44694	-4.22078	-5.13492	-5.09197	-5.17217	-4.52822	1.04063	-4.60539	-4.92116	-4.75291	-4.329	-5.22027	-4.95785	-4.92094
AGR3	5.30001	-3.71349	-3.57156	-5.86259	-3.4422	-2.86765	-2.69542	-4.13212	-3.06488	-3.95307	-2.48787	-4.57437	-3.38423	-2.14896	-3.63732	-3.32053	-0.436717	-3.37728	-2.9303	-3.72561
AHSP	-4.22952	-4.46043	-3.92635	-4.50977	-2.20966	-3.80418	-2.03074	-1.1908	-4.00088	-4.01933	-3.7667	-4.24286	-3.64919	-4.09664	-4.89539	-2.52609	-4.30497	-4.30121	-4.10697	-4.53341
AIF1	-2.93416	4.81957	-1.99705	-4.19041	2.10031	0.0354606	4.90086	-2.35775	-2.19747	1.33048	-2.33287	-3.22166	-0.433298	1.10448	-2.673	-2.31716	-3.35332	-3.50312	3.38379	-3.03605
AKR1C1	-3.34279	-0.261322	3.34413	-4.07743	-2.31432	-1.68397	-2.22861	-2.59342	0.704541	-3.05272	-2.9782	-3.01578	0.784167	-2.88798	0.45643	-2.42823	0.883143	-3.1986	-0.499418	-3.50692
AKR1C3	-3.51838	-0.0792611	2.08967	-4.97327	-2.29829	-1.43773	-2.84034	-3.39723	0.647213	-2.72169	-3.25011	-3.84593	0.219194	-3.28458	-0.402855	-3.3675	-4.1899	-3.92252	-2.85766	-3.69228
ALDH1A3	-4.01964	-0.315891	-2.26027	-5.86467	-0.839798	-2.95738	-2.43163	-3.93277	0.292938	2.00973	-4.45886	-4.36765	0.819236	-2.21357	2.66856	-3.84076	-4.76031	-4.85753	-4.16232	-4.55987
ANGPT2	-3.42366	-3.63219	-3.60829	-6.0338	-4.52798	-4.74777	-4.48555	-4.31753	2.57479	0.5132	-0.4852	-4.80583	-6.06676	-4.27548	-3.30867	-4.59633	-4.64007	-2.26324	-4.38126	-4.56891
ANKRD28	2.02067	-2.24309	3.614	1.25512	1.50665	0.720592	-2.41154	2.10741	1.18572	1.06981	-1.53275	0.371154	0.410759	3.12835	0.325936	3.30372	1.32614	-2.04229	-0.483705	-0.894391
ANKRD29	-0.0360975	-2.75241	1.76763	-1.03576	-2.76557	-3.25038	-3.11932	-2.56127	2.12107	-1.86557	0.454509	-0.418666	-1.42874	-2.84219	-4.48238	-3.12266	-4.35009	0.0168395	-0.46736	0.533535
ANKRD30A	5.85853	-0.652028	-0.740448	4.82029	-0.653482	-0.384556	1.09267	0.0778408	-0.966933	-1.23494	-1.73521	1.18421	1.31663	-0.541085	-1.97891	1.86078	4.61225	1.20117	-0.59786	5.98864
APOBEC3A	-3.2178	-0.326627	-2.76985	-2.82998	-0.868699	-3.79384	-3.49319	-3.37523	-3.20605	-3.7238	-2.50872	-3.13483	-2.89392	-2.459	-4.02752	-3.43513	-3.62771	-2.27644	-2.5216	-2.47074
APOBEC3B	-2.55412	0.692617	3.06939	-0.657529	2.51184	1.81016	-0.558907	-1.08326	-0.934241	-1.92282	-1.32747	-1.90157	-3.10228	1.62439	-1.68941	-2.12526	-0.667694	-1.23672	-2.05787	1.11464
APOC1	-4.56436	-3.39564	-2.74401	-5.32645	-4.34885	-3.17372	-3.91747	-4.08541	-4.56562	-4.12252	-3.17568	-4.57956	-3.99458	-3.6222	-4.27623	-4.05654	-4.85059	-4.98263	4.52612	-4.51953
AQP1	-3.10746	-1.58218	-0.880224	-4.23999	-2.45104	-3.55912	-2.4805	-2.90755	4.50354	2.78963	2.7749	-3.60797	0.807413	-2.10961	0.650452	-2.56387	-3.78571	-3.67598	-4.39274	-3.42185
AQP3	-3.83348	-3.21501	-2.6508	-5.81401	2.56215	-1.22815	-3.16493	-3.82051	-1.60661	-2.5668	-0.355796	-3.93624	-1.30182	2.69368	0.150559	-3.82092	1.65938	1.08562	-4.01761	-4.1727
AR	4.20741	-2.54757	-1.8457	3.37346	-3.02643	-3.15838	-2.38178	-0.369433	-2.67734	0.726555	-2.14141	-0.972256	-0.740622	-2.63884	-3.00405	1.00498	-0.122019	0.316714	-2.4695	4.02175
AVPR1A	-5.70441	-5.16404	-5.13915	-6.88005	-6.05877	-6.42271	-5.7378	-5.19019	2.57422	-3.0352	-6.0659	-5.77098	-7.16466	-5.39302	-5.17285	-6.07664	-6.55748	-6.34037	-4.3661	-5.90909
BACE2	0.613028	-1.62893	3.89535	-4.16269	-1.37683	-0.197559	-1.49789	-1.47344	2.23586	2.45889	0.383765	-2.25453	0.858163	-2.08706	1.66512	2.82701	-2.37714	3.44359	-1.75662	-2.33865
BANK1	-4.31868	-2.59586	-1.09952	-5.7741	-4.446	3.78411	-3.76632	-4.08214	-2.94141	-4.06083	-4.13887	-4.52725	-1.31848	-3.19938	-4.48612	-4.25576	-5.04724	-4.44362	-4.70357	-4.58692
BASP1	-2.11838	3.81366	-1.85067	0.42564	-0.841629	3.59764	0.437964	-0.965353	-1.65816	3.81108	-2.84869	-2.46966	2.47323	2.88284	-3.2723	-0.384965	-3.66485	-3.05245	1.78776	4.99754
BTNL9	-4.11311	-1.84906	-3.24817	-5.37133	-1.59076	-2.38743	-0.242466	-3.69209	2.97188	-2.10873	-4.36515	-4.43712	-0.0691991	-1.81152	-4.44729	-4.08102	-5.08123	-4.78553	-2.85958	-4.37445
C15orf48	0.521872	2.79824	-1.86357	-5.55768	-2.99271	-2.96432	-4.16486	-3.79045	-4.16712	-2.85401	-4.17722	-4.11993	-3.56854	-2.80989	0.956861	-3.64375	-3.231	0.668911	1.95762	-4.25512
C1QA	-4.25305	-2.07495	-3.03601	-5.57394	-3.16079	-1.8786	4.85074	-3.67813	-4.57005	-3.61838	-3.9544	-4.39394	-0.0431047	-2.79042	-3.82831	-3.79455	-4.81479	-4.58489	0.240539	-4.3698
C1QC	-3.91489	-1.94323	-2.97828	-5.18801	-3.52226	-2.07588	4.82599	-3.49511	-4.77717	-3.49774	-4.13503	-4.13368	-3.57002	-3.06282	-4.11345	-3.5292	-4.36552	-4.42139	3.30393	-4.04206
C2orf42	0.625398	-0.579169	3.04735	0.316983	1.05083	-0.131738	-0.48561	0.00371903	-0.597629	-0.818108	-2.61354	-2.21116	-1.17355	1.48876	-2.26786	1.42625	-1.93922	-2.45659	-1.19375	1.71009
C5orf46	-3.94294	-3.56541	-2.18529	-5.9716	-1.36929	-2.61054	-3.06712	-4.12838	-4.49319	0.450935	1.31213	-4.55833	-4.36794	-3.38158	1.58234	-4.07452	-4.88176	-5.03792	-2.9838	-4.30668
C6orf132	-1.63305	-3.29928	2.36863	1.67922	-3.58266	-3.75295	-3.31981	-2.14911	-3.19453	-2.07469	-0.913201	-1.95439	-3.39187	-2.93523	0.625474	-0.918813	2.39639	2.29697	-2.80923	1.84467
CAV1	-3.27544	-2.14659	-2.86751	-5.27533	-2.81964	-3.18185	-2.33336	-3.0694	4.08818	3.05013	3.11098	-4.02888	0.613059	3.08512	-3.25729	-3.41414	-4.1829	-4.25322	-4.42743	-4.04088
CAVIN2	-4.87968	-3.87817	-4.0506	-5.87923	-4.73216	-4.96334	-4.10405	-4.38678	2.67893	-3.7655	-4.15803	-4.90073	-4.77511	-4.271	-4.13197	-5.07014	-5.53062	-5.34435	-4.86062	-4.96962
CCDC6	3.52753	3.28026	2.20587	2.95335	0.00905096	0.958823	0.161651	5.58798	1.52885	2.60946	2.02757	0.299519	-0.456956	0.406783	1.75072	2.95894	0.185727	4.1711	-0.525039	3.23103
CCDC80	-3.06169	-0.427188	-2.59743	-3.99861	0.634866	-0.317807	0.415026	-2.3866	-0.639566	1.00991	-1.45428	-3.05286	4.64291	-1.81835	-2.66577	-2.73041	-3.36606	-3.33326	-3.14296	-3.20949
CCL20	-3.43495	-2.81929	-1.89247	-3.12103	1.42979	-1.7756	-3.67443	-3.75823	-4.46416	-4.66771	-4.68919	-3.75962	-3.49136	-3.94799	-1.54986	-3.70944	-4.22061	-4.14874	-0.980312	-3.76479
CCL5	-4.00359	-0.865305	0.147994	-5.71875	5.20639	-2.09675	-2.23747	-3.54149	-1.61852	-2.50371	-3.97275	-4.43929	-2.98555	-2.97843	-3.52041	-4.00435	-4.63884	-4.62011	-3.11358	-4.36121
CCL8	-4.09784	-1.59405	-2.88059	-5.09932	-0.0692372	-1.99489	1.80311	-3.70171	-0.240029	-3.07803	-4.22604	-3.95986	-0.213712	-1.97038	-4.04352	-3.47878	-4.7316	-3.99075	1.02491	-3.92976
CCND1	5.8895	1.5882	1.15656	3.11286	0.652688	0.320911	1.7855	6.67023	2.78857	2.69297	3.14403	2.89079	0.678715	0.33451	0.747223	2.01273	3.70306	5.42026	1.06977	6.69656
CCPG1	1.28765	2.63035	4.39006	1.90289	2.03774	1.46414	1.5323	0.121296	2.0502	3.30526	1.66863	-1.08599	1.13298	4.69915	1.02291	1.30294	2.99764	0.751635	1.10086	1.24227
CCR7	-4.13442	-3.29836	-2.44855	-5.51954	-2.07462	4.15404	-4.27187	-3.93494	-3.36964	-3.8996	-3.47903	-4.53531	-2.50884	-3.57554	-4.15474	-4.15797	-5.13145	-4.73462	-4.38506	-4.1902
CD14	0.436527	-2.34036	-0.894231	-4.71516	-3.65521	-2.69428	5.19627	-3.0396	-3.88896	-3.59304	-3.95783	-3.48182	-3.49055	-3.16988	0.371282	-2.94038	1.4273	-3.09251	-1.14016	-3.48207
CD163	-4.12226	-1.96582	-3.05329	-5.27237	-3.94339	-2.3245	5.32531	-3.97105	-4.91353	-3.93018	-4.60477	-4.31329	-2.33013	-3.57219	-3.92228	-4.01695	-4.3706	-4.54752	0.526834	-4.31208
CD19	-5.11895	-4.67825	-4.19915	-6.29203	-5.31695	2.37995	-4.99111	-4.71155	-5.02585	-4.71901	-5.26077	-5.14256	-2.99827	2.08376	-5.10634	-4.80742	-5.50209	-5.5016	-5.24007	-5.17774
CD1C	-4.80995	3.81443	-3.24343	-6.2836	-4.76088	-3.52887	-4.23498	-4.68648	-5.51123	-4.7211	-4.74264	-5.00915	-2.41934	-4.21812	-3.13659	-4.93426	-5.4491	-5.39756	-5.01195	-5.05294
CD247	-4.31361	-2.86158	-0.719827	-4.57739	4.20767	-2.02587	-3.49741	-3.70482	-3.70728	-4.14419	-4.72812	-4.27559	-4.51879	-3.77581	-4.42234	-4.29622	-5.39374	-4.59988	-4.42154	-4.30447
CD27	-4.50056	-3.55843	-2.89366	-5.8687	2.87835	2.08632	-3.92773	-4.24341	-5.05748	-4.107	-4.71821	-4.70279	-3.5951	4.20917	-4.51074	-4.21524	-5.17768	-4.75492	-4.62693	-4.70714
CD274	-2.80654	1.34159	-0.926339	-4.67057	0.60445	1.30732	0.365374	-3.18644	-0.753509	-3.11508	-0.334567	-3.18072	-1.41022	-0.767939	-1.52339	-3.26157	-1.63505	-3.46642	-0.461962	-3.40557
CD3D	-4.77701	-2.83905	-2.9118	-6.25077	4.26447	-2.26919	-3.5938	-4.47351	-3.79598	-4.10998	-4.81136	-5.07582	-4.2898	-4.00468	-3.36192	-4.8242	-5.70718	-5.39677	-4.53875	-5.07324
CD3E	-4.19597	-1.88491	-0.146861	-5.63832	5.49131	-1.25182	-2.91885	-3.70333	-2.8376	-3.33391	-4.40408	-4.47657	-4.32609	-3.41836	-3.16274	-3.99724	-4.71725	-4.4983	-4.40086	-4.37498
CD3G	-4.21126	-2.95641	-1.69341	-5.60683	4.26259	-2.34968	-3.4487	-3.79825	-3.05669	-4.2305	-4.61866	-4.64058	-4.97837	-3.8442	-4.04242	-4.17035	-4.82789	-4.92484	-4.7369	-4.51856
CD4	-3.07443	4.79661	-2.37169	-4.81233	-0.30009	4.80836	4.96727	-3.16661	-2.04624	-1.49923	-3.66777	-3.57887	-4.02588	-2.54367	-1.67678	-2.63535	-3.34743	-3.50522	3.2131	-3.48989
CD68	-3.56439	0.153759	-2.65744	-4.85078	-2.07054	-0.365425	4.89111	-3.19059	-3.66833	-2.50002	-4.29465	-3.73346	1.13984	-1.84237	-3.68208	-2.73513	-3.66818	-3.7897	4.92884	-3.58617
CD69	-4.19538	-0.560763	-2.37002	-5.64733	4.48412	1.27531	-2.09232	-3.90028	-3.34183	-3.06106	-4.17091	-4.38201	-2.30004	-3.28122	-4.00369	-4.08476	-4.88407	-4.50439	-3.14625	-4.37491
CD79A	-4.97073	-4.38383	-4.29368	-6.58065	-5.04852	2.18865	-4.99422	-4.82227	-5.81898	-5.26266	-5.57431	-5.07815	-4.17615	4.12534	-4.8781	-4.9665	-5.67015	-5.76875	-5.33913	-5.39808
CD79B	-5.0924	-4.89072	-4.45399	-6.30438	-4.75344	1.70056	-4.99743	-4.5682	-0.822705	-4.61544	-2.72362	-5.00346	-4.1595	1.67329	-4.01532	-4.81666	-5.05938	-5.43865	-5.46061	-5.18477
CD80	-4.14837	1.82264	-3.27422	-2.44512	-4.17926	1.94247	-3.27944	-3.74957	-3.86978	-3.49042	-4.45746	-3.68757	-3.49721	-3.78191	-4.69619	-3.4294	-4.31525	-4.51686	0.180493	-3.79666
CD83	-2.57047	3.15571	0.0124654	-0.713362	-3.27686	3.06218	-2.74532	0.932897	-3.42952	-3.31066	-2.91471	-2.34804	-4.60476	-3.0921	-1.33635	1.03242	-3.89158	-2.7981	1.97415	-2.21119
CD86	-3.27668	4.25584	-1.98955	-4.52184	-2.74466	1.98371	2.85373	-2.89758	-4.30696	-2.45075	-3.75345	-3.42325	-1.45111	-1.89795	-3.3924	-2.81374	-3.79444	-3.92916	2.37558	-3.42321
CD8A	-3.3383	-2.19913	1.45331	-4.95276	5.51358	-2.53384	-2.88818	-3.57942	-2.492	-3.33492	-3.76116	-4.01109	-4.41791	-3.38152	-3.46323	-3.76385	-4.27243	-4.10027	-4.4472	-3.92547
CD8B	-3.77949	-2.37636	1.18921	-4.81194	3.87517	-3.04968	-2.27632	-3.49537	-3.68934	-1.01493	-2.86385	-3.94367	-0.0274899	-2.98674	-2.64061	-3.60458	-4.61428	-4.4346	-3.52391	-3.96984
CD9	0.443371	-0.965005	0.610243	4.22756	-1.8784	-1.5837	-1.08279	0.350838	1.67412	-1.62479	2.15233	4.29443	-2.47996	0.111922	2.46896	1.69417	4.80407	3.8611	2.57871	1.43443
CD93	-4.04205	2.56215	-3.23257	-5.31866	-3.3114	-3.6336	3.60743	-3.67375	3.91834	-2.13202	-4.20674	-4.27257	-5.03382	-2.33205	-3.89161	-3.61576	-4.43858	-4.44869	-3.69239	-4.04909
CDC42EP1	0.280764	-1.51926	-0.0633804	-0.796795	-2.48105	-2.32279	-2.64341	1.62334	0.31612	1.4213	-3.5286	-0.747904	-1.26946	-1.9169	1.43865	1.39704	1.70936	0.824037	-1.96013	-1.08069
CDH1	3.04627	-1.19809	1.66039	2.86192	-1.72355	-1.18055	-0.8088	-0.649781	-2.38573	-1.9452	0.731227	4.47534	-0.885404	-1.33341	2.5833	4.52338	3.57164	5.23009	-0.26702	4.73179
CEACAM6	0.596821	-1.32462	-1.67304	-4.90885	-1.63906	-0.991497	-0.411862	-2.24224	-0.969436	-2.04016	0.380997	-3.61964	0.0842082	-0.921483	-0.389309	-1.69706	6.45821	-0.847318	-1.9233	-3.20261
CEACAM8	-3.06023	-3.972	-3.57372	-5.19746	-4.30222	-3.85586	-3.60413	-3.66039	-4.25675	-4.2963	-4.29744	-3.88828	-4.2395	-3.59947	-3.38938	-2.80066	2.46883	1.90901	-3.75804	-4.26183
CENPF	-3.65899	-3.77061	-3.63821	-4.03452	-4.056	-3.94227	-3.95235	-2.93938	-1.11152	-3.38042	-4.64621	-3.20633	-4.51741	-3.50369	-4.77082	5.75638	-4.53924	-4.81296	0.196691	-4.07681
CLCA2	-4.10909	-2.75238	-2.16181	-5.29285	-1.27706	-2.7541	-2.53578	-3.76796	-4.47915	-3.78131	1.13046	-3.68237	-2.47271	-3.07526	-2.29564	-3.64438	-4.23121	0.671966	-3.16576	-3.10227
CLDN4	-0.0599112	-0.992127	0.359091	1.2913	-1.67395	-1.41562	-0.889075	-0.963758	-1.13048	0.276569	-3.25873	-1.05884	-1.51187	-1.00745	2.17205	2.82303	3.82651	3.6924	0.212888	0.79047
CLDN5	-5.26251	-4.75261	-4.93886	-6.23276	-5.30902	-5.0947	-4.69095	-5.12797	1.07449	-5.27243	-5.69551	-5.40344	-2.59019	-5.32067	-5.46057	-4.9628	-5.47025	-5.54101	-5.55651	-5.76692
CLEC14A	-4.6194	-2.64649	-4.057	-5.13984	-4.03423	-4.96695	-4.03525	-3.93418	3.39591	-3.12096	-5.05212	-4.68601	-5.84632	-3.16704	-5.05064	-4.90497	-5.47594	-5.06523	-4.50132	-4.69457
CLEC9A	-4.17652	2.59495	-2.34303	-3.61456	-3.92589	-3.97387	-4.72036	-4.1433	-5.36584	-4.77787	-5.09975	-4.3409	-2.63383	-3.20129	-3.30972	-3.96807	-4.26409	-4.65215	-5.11729	-4.50496
CLECL1	-2.45445	2.12231	-0.381612	-3.15801	-4.12627	1.98786	0.30642	-2.50152	-3.88753	-3.68054	-3.56959	-3.2436	-2.66876	1.05944	-3.20012	-1.83863	-2.47654	-2.90721	-2.77614	-3.41609
CLIC6	-1.94478	-3.32821	1.46343	-2.70331	-0.947	-0.944338	-3.00575	-2.83364	-1.7169	0.253233	-3.84681	-3.2001	-1.08797	-0.691215	-2.08418	-2.11803	-3.61772	-2.20047	-2.05496	-1.91866
CPA3	-3.42837	-3.75362	-3.62229	-5.82504	-4.01577	-3.252	3.71782	-4.26113	-5.03225	-4.31712	-4.4509	-4.26539	-1.73364	-3.63214	-4.69433	-4.20537	-4.83642	-0.142578	-4.40461	-4.36548
CRHBP	-5.97052	-5.55148	-5.03383	-6.12603	-5.02469	-4.8778	-2.50033	-5.61691	-5.71182	-5.4066	-5.8444	-5.93747	-4.10548	-5.5022	-6.39751	-5.59347	-5.97631	-6.16215	-4.80152	-5.24759
CRISPLD2	0.39965	-2.14504	-1.7654	0.53474	-2.06747	-3.13962	-2.37075	-2.07615	0.0149894	4.0751	-2.53186	-1.93092	1.79518	-2.83115	-1.74395	-1.1823	-2.23165	0.54765	-4.10407	-1.3272
CSF3	-3.25752	-3.67084	-3.43682	-3.33205	-1.29927	-2.7086	-1.72662	-2.95185	-2.62131	-1.80365	-3.66644	-4.42749	-2.1265	-1.56928	-4.14676	-3.60672	-2.38397	-3.9365	-2.40747	-1.63207
CTH	-0.851214	-2.11467	1.82828	-0.968666	-3.16558	-0.234178	-2.86983	-2.56966	-1.32898	-0.790999	-2.361	-0.650912	-1.4711	1.22175	-2.17361	-2.26843	0.249975	-3.38938	-1.6673	-2.6448
CTLA4	-4.38918	-3.51783	-2.03158	-5.83023	-1.31498	4.40886	-3.98792	-4.17491	-3.80161	-3.29099	-4.39516	-4.69722	-2.28483	-3.83899	-4.19423	-4.477	-4.88385	-5.04183	-4.50093	-4.64377
CTSG	-5.17205	-4.66179	-4.49155	-6.10735	-5.05544	-4.32464	2.8444	-4.82435	-5.30919	-5.15557	-5.21533	-5.27621	-2.42611	-4.60313	-4.61956	-5.06977	-5.59967	-5.55859	-5.1763	-5.19923
CTTN	3.69753	-0.9817	5.92746	4.05317	-1.39503	-1.46199	-0.978163	1.27091	2.70624	3.44911	1.503	3.91803	1.47225	-0.758198	2.11134	2.8541	-0.526703	4.74182	-0.572827	4.59229
CX3CR1	-4.33506	3.98276	-1.69237	-4.53715	-4.58524	-4.14429	-1.72184	-3.71001	-4.87618	-4.07751	-3.98477	-4.01664	-2.26095	-4.05845	-3.23353	-3.84406	-4.84145	-4.95756	-3.10643	-4.08633
CXCL12	-2.56685	0.176945	-2.28398	-3.44052	1.52448	2.66056	3.52895	-2.13766	3.36429	-1.03014	-2.29227	-2.55605	4.53435	-0.436673	-2.32941	-2.16857	-2.84643	-2.90933	-2.93336	-2.57784
CXCL16	-1.79697	3.17403	2.05676	-2.54949	-2.64793	-1.42243	2.85469	-2.11665	-1.74572	-0.554026	-0.068216	1.83692	-0.957945	-1.7742	2.13844	-0.549486	-1.88574	2.7863	3.14757	2.88984
CXCL5	-1.36702	-3.72693	-0.848772	-2.45508	-1.97792	-0.866668	-3.4549	-3.60757	-3.01924	-3.21812	-4.58568	-3.68346	-2.37366	-3.40426	-0.582856	-2.64271	-4.21742	-3.91452	-1.13798	-3.21173
CXCR4	-3.50628	0.33304	-1.47949	-0.717638	1.47664	7.0964	-1.22565	-1.97256	-3.25393	-2.65159	-3.50083	-2.79148	-4.38501	-0.0840342	-1.73457	-0.78729	-4.26494	-2.9638	0.709602	-1.57766
CYP1A1	-3.03103	-3.08775	-3.42414	-2.89954	-2.29484	-1.80506	-2.32063	-3.12477	-3.50664	-3.8834	-3.96038	-3.45592	-2.152	-3.65537	-3.84795	-3.3787	-3.57275	-4.11515	-2.7605	-2.64049
CYTIP	-3.14524	3.44727	-1.39194	-4.59089	4.58102	3.48768	-2.02127	-2.67526	-4.26027	-3.31049	-3.99378	-3.5318	-4.67155	4.39489	-2.5001	-2.57149	-1.90768	-3.53438	-3.3803	-3.58104
DAPK3	0.722573	-1.5473	2.79411	-2.64678	-0.631279	-1.4179	-2.03601	0.106035	0.265837	0.704055	-0.747732	-2.53188	-3.43244	-0.000877976	-2.15737	-0.253215	1.36343	0.749801	-1.59249	2.65418
DERL3	-4.87297	-4.66604	-4.06316	-6.70964	-5.39093	-2.72499	-5.33805	-4.94818	-5.73191	0.0372524	-4.70186	-5.35408	-5.68899	3.91677	-4.88242	-5.15673	-5.90114	-5.74719	-5.15602	-5.3312
DMKN	2.42829	-4.06128	0.496739	-3.17035	-4.0939	-3.91223	-3.87026	-2.47801	-4.89753	-4.26966	1.28036	-2.67549	-4.86095	-3.57345	0.452527	-2.66743	-4.20593	-3.47645	-3.57359	3.70954
DNAAF1	0.190912	-4.00595	2.64533	-1.10673	-3.10092	-2.18632	-2.96355	-1.00558	-4.13095	-4.28924	-4.09914	-3.64121	-2.35448	-3.55965	-4.45773	-3.28308	-4.03202	-3.92012	-4.08009	-2.93509
DNTTIP1	1.93483	2.38461	0.886759	1.00582	0.452683	1.7857	0.803131	3.46373	0.977589	1.8823	0.56642	0.510882	-0.52481	1.68606	1.41125	2.29173	2.54878	-0.277149	0.85758	0.183444
DPT	-4.10067	-0.500401	-3.62885	-5.10324	0.625313	-0.253982	-0.609022	-3.44487	-3.84284	-2.97702	-4.26283	-4.16737	2.5109	-2.06034	-4.47537	-3.73759	-4.64822	-4.59605	-3.78295	-4.30938
DSC2	-0.013945	1.81959	1.97506	-2.41762	-2.10537	-1.04256	3.04816	-1.39087	-1.26227	-1.99433	2.41524	-2.12042	-1.53611	-1.23026	3.30989	-0.93131	2.85119	3.56977	0.0664567	3.40701
DSP	4.29517	-1.9804	-0.167906	2.54262	-2.3775	-2.25827	-1.83663	-0.33336	-0.21375	-2.46124	3.55707	0.0909699	-3.70226	-2.18918	2.67173	4.25757	2.87998	4.89044	-2.17538	3.92014
DST	3.25732	1.39731	6.15496	3.6146	-2.23484	-1.3438	2.27713	0.392101	2.69255	0.257124	4.9725	4.43643	0.0616043	-0.926032	2.43859	2.87684	1.80446	2.86334	0.652502	0.5958
DUSP2	-3.75973	0.183652	2.0456	-1.24352	2.7156	0.905224	-3.15825	2.03355	-4.23608	-2.7507	-1.33899	-3.46801	-3.40209	-2.26107	-1.21947	-2.57576	-4.46904	-4.0375	-0.859118	-2.17817
DUSP5	3.12932	1.2703	3.55373	0.765866	-2.74302	3.20526	-0.914225	2.08416	0.839458	1.74103	-2.24944	-1.61542	-2.21768	4.21544	-0.353208	2.891	1.42297	1.7556	-1.04138	0.0176027
EDN1	-3.75118	-3.72985	0.129103	-6.08332	-3.71542	-3.23867	-4.23578	-4.19949	1.76778	-4.14596	-4.0929	-4.64314	-3.81984	-3.26321	0.946402	-4.42359	-4.47419	-0.326991	-4.22102	-4.73311
EDNRB	-4.62592	-2.76921	-4.23242	-6.14997	-3.67822	-4.23177	-2.21075	-4.37725	2.51067	-2.16533	-4.9612	-4.914	1.41515	-3.57762	-5.14143	-4.71771	-5.35553	-5.41965	-0.609381	-5.01339
EGFL7	-3.94532	-4.48032	-3.96534	-0.492496	-4.63329	-4.7031	-0.355478	-3.66605	1.82022	-4.93151	-5.34815	-0.808017	-6.32337	-4.06489	-5.26352	-3.68238	-5.10276	-3.78181	-4.986	-1.89192
EGFR	-3.71482	-3.39567	5.20625	-5.52674	-3.24437	-3.97193	-3.21993	-3.56178	-1.75535	-1.09407	2.59547	-4.15685	1.55416	-3.38943	0.588218	-3.63073	-4.68663	-4.17635	-4.19808	-4.00446
EIF4EBP1	-3.2227	-1.59517	-1.4273	-3.93685	-3.74884	-3.1401	-0.5581	4.67903	0.199538	0.734596	-3.90454	-2.64477	-2.38566	-2.59127	-0.193347	-2.07545	-4.38788	-3.68169	0.948116	-2.84403
ELF3	-1.0395	-2.85716	-0.796558	3.10562	-3.15376	-3.20811	-2.52087	-1.48499	-2.65718	-2.98414	-3.70086	-1.59779	-2.22992	-2.7159	1.89903	-0.00200617	2.09393	3.86506	-0.562244	-0.536846
ELF5	-3.85456	-2.75298	-0.459761	-0.450074	-0.673647	-1.19952	-1.61406	-2.42178	-2.9711	-3.34055	-4.50555	-3.11659	-1.63542	-1.43561	1.56144	-2.73624	-4.05354	-2.48955	-1.0145	-3.10956
ENAH	-0.768151	-1.79396	4.50909	3.12423	-1.89927	-2.16247	-1.75558	1.49966	1.955	3.96642	2.67631	0.357409	-2.13781	-1.46357	1.40464	1.62222	-2.1062	3.63496	-1.03892	5.24724
EPCAM	4.66209	-0.565921	1.94135	4.97354	-0.754155	-0.79292	-0.108617	1.73276	-1.31455	-0.780574	-0.115488	5.28291	-0.802441	-0.743278	2.77603	4.94649	3.08844	5.65039	-0.13316	5.14331
ERBB2	2.86444	1.37813	2.07457	1.77147	2.10348	2.1277	2.51117	3.31802	1.90728	1.38758	2.94932	5.62321	2.83011	2.27903	3.30976	3.03651	6.48543	3.80705	2.52555	8.17659
ERN1	-2.50371	0.560359	4.26904	0.977327	3.89658	2.52026	-0.340039	-1.56521	0.0347923	0.217715	-3.40751	-1.71587	-0.922133	5.04919	-0.0719956	-0.982335	-3.03075	-2.18877	0.590389	2.53566
ESM1	-4.59709	-4.23731	-3.83801	-4.16086	-1.97815	-4.35993	-4.96804	-4.12371	2.26177	-4.48856	-4.84896	-4.5873	-6.19434	-3.43921	-3.48932	-4.43148	-5.35711	-5.03327	-3.49272	-4.50706
ESR1	5.2287	-3.36252	-3.6279	-4.88196	-3.67367	-2.77234	-0.480717	-3.49555	-2.7899	-3.92172	-4.61548	-4.38188	-1.50333	1.54574	-4.39228	-1.31564	-2.18384	-4.26004	-2.57552	-2.38036
FAM107B	-0.606734	2.49553	1.42461	-2.02025	4.36629	4.0382	2.32937	4.28658	1.45011	3.08017	-2.32558	0.148582	0.406976	3.14343	0.767539	3.40929	0.773069	3.62068	1.84341	-0.611197
FAM49A	-3.23372	2.18281	1.75284	-4.86072	-3.12334	2.3182	2.41989	-2.91238	0.443024	0.434014	-0.106134	-3.29695	0.266055	1.79115	-0.334116	-2.88093	-4.11123	-3.59452	0.391668	-3.25548
FASN	-0.0730066	-1.71763	-0.347566	4.61779	-1.69476	-1.49573	-1.55096	2.29602	0.19445	-1.03037	-1.85017	6.38254	-0.405801	-0.835105	-0.853732	1.78996	1.73475	-0.793272	1.74056	0.377563
FBLIM1	-3.36175	-1.57366	3.5077	-4.24749	0.50558	-2.3455	-1.07946	-1.96529	2.10121	3.36541	2.00976	-3.24551	-0.0378974	-1.57983	1.55207	-2.90613	-3.93329	-3.60252	-0.890495	-3.06108
FBLN1	-4.07514	-2.19937	-3.34164	-5.35353	-1.95229	-2.74756	-1.69347	-3.77694	-3.46757	-2.08728	0.358019	-4.37166	3.52202	-3.39711	-3.17532	-4.07971	-4.48595	-4.4957	-4.63702	-4.36623
FCER1A	-4.61943	4.01359	-3.67166	-6.36948	-4.30203	-3.46173	-3.70971	-4.76883	-5.14742	-4.99425	-4.95601	-5.06262	-0.975078	-4.08839	-4.45553	-4.95318	-5.45234	-5.12299	-4.96466	-5.1713
FCER1G	-3.49096	4.10936	-2.54427	-4.55737	-1.75239	-0.702207	4.99833	-3.04298	-3.68072	-2.33257	-3.89962	-3.55293	-2.03123	-1.8839	-3.61389	-2.6147	-3.60542	-3.79342	4.96347	-3.37735
FCGR3A	-4.43741	-2.10487	-3.60046	-5.72792	-3.40779	-3.09172	2.83823	-4.10873	-4.82332	-3.58724	-4.46811	-4.61771	-4.047	-3.34762	-4.68665	-3.98439	-5.10931	-5.02815	4.14121	-4.57587
FGL2	-3.45515	5.62565	-1.28285	-5.13187	-2.42149	-1.46387	4.08478	-3.25053	-0.774262	-2.22901	-3.57426	-4.0077	0.533537	1.93896	-2.5395	-3.23098	-3.86382	-3.99434	-1.05308	-3.79764
FLNB	5.28948	1.4382	4.78458	3.29198	-0.998528	3.12097	-0.814138	-0.324491	3.12179	1.93898	2.18568	4.03413	-1.02442	-1.47671	2.4981	1.45323	3.84364	0.935573	0.313567	1.47055
FOXA1	5.74641	-1.01421	-0.583941	4.97147	-1.0142	-1.07351	-0.866114	2.77995	-1.47686	-0.416797	-1.72657	4.61932	-1.80421	-1.01122	-1.91136	3.40761	3.80845	2.90975	0.655178	6.15173
FOXC2	-3.97099	-3.76233	1.55059	-4.9894	-3.90824	-3.24897	-3.90967	-3.49998	0.0405369	0.00491214	2.16273	-3.95486	-5.16815	-3.39743	-1.01859	-3.33584	-4.3939	-4.43349	-3.90745	-3.92255
FOXP3	-0.752262	-3.6382	-2.05547	-0.705155	-2.49078	2.83103	-3.88278	0.899942	-4.39615	-2.39517	-2.79023	-0.724055	-1.96213	-3.15237	-4.21925	-2.41063	-3.9038	-1.98675	-3.74524	-0.978429
FSTL3	2.19361	-2.8204	-2.75471	0.210178	-3.28202	-3.5052	-3.31925	-2.82213	-3.4137	2.39508	1.43147	-2.70658	0.418401	-2.76951	-2.01241	-1.87796	1.20338	1.29666	-3.44982	-0.684483
GATA3	6.30908	-0.297437	1.19123	5.26837	3.25111	1.04432	-0.132468	1.69098	-0.779643	-0.327381	1.19547	3.20078	-0.638854	-0.0791856	2.14036	2.80873	5.32975	0.506641	1.86194	2.96774
GJB2	-5.12536	-4.68813	-3.88764	-5.9437	-3.99308	-5.25591	-4.44859	-4.30933	-4.78661	3.40913	-3.25069	-4.91637	-4.89346	-4.34908	0.13673	-4.80786	-5.77949	-4.41245	-5.14826	-4.86646
GLIPR1	-2.98506	4.15088	-1.09744	-4.65396	3.52365	2.90741	3.52093	-2.86645	-3.32431	2.73311	2.43335	-3.49934	-0.12904	2.15746	1.3826	-2.69023	-3.51454	-3.6567	0.841016	-3.32231
GNLY	-3.87613	-3.21506	-1.95434	-3.16615	2.50834	-3.45468	-3.60102	-4.05092	-1.49209	-4.32077	-4.59591	-3.72347	-2.68476	-3.93023	-3.91632	-3.0386	-4.74652	-3.61359	-3.53054	-3.35606
GPR183	-3.46886	3.92238	-2.0228	-5.23204	3.74991	4.47933	3.03319	-3.29622	-3.20273	-2.37024	-3.19888	-3.86688	-0.082338	0.736807	-2.45183	-3.01144	-3.97413	-4.00692	-0.312441	-3.80857
GZMA	-4.50515	-2.59684	-1.28852	-6.02464	4.60807	-2.64976	-3.26528	-4.22042	-3.46147	-4.11418	-4.53282	-4.91864	-5.07617	-4.0241	-4.53254	-4.63691	-5.35593	-5.1242	-4.78628	-4.85698
GZMB	-3.76019	-1.97198	-2.69524	-4.80008	1.59877	3.13634	1.06851	-3.30517	-1.11827	-1.33008	-2.81492	-3.84647	1.01402	-1.78927	-3.62626	-3.25393	-4.40804	-4.30103	-2.24568	-3.43806
GZMK	-5.2988	-4.68481	-4.94021	-5.2554	0.988605	-2.60414	-1.52469	-4.54243	-5.61179	-5.55636	-5.29527	-4.60468	-2.30601	-4.638	-5.81208	-4.81354	-5.34668	-4.8861	-5.22154	-4.47555
HAVCR2	-3.66783	3.56409	-3.31124	-5.38275	-3.50893	-2.33282	2.77899	-3.67157	-5.00559	-4.33401	-4.29958	-4.01512	-5.45767	-3.46054	-4.21897	-3.53831	-4.0143	-4.58054	3.47455	-4.09079
HDC	3.58087	1.08922	5.12137	2.70143	1.48216	1.36481	0.0907015	-1.7955	1.07663	-1.84237	-2.58045	-2.28782	-1.26325	1.44402	-2.6928	0.684875	-0.523843	-1.81969	-1.24007	-1.32671
HMGA1	-2.79246	2.54189	-1.73102	-2.34622	0.797266	0.271461	-2.76552	6.04213	-3.9286	-3.11107	-3.71015	-2.35399	-3.69966	-0.903618	-2.42436	-0.138582	-2.76684	-3.01571	-0.843856	-2.73415
HOOK2	1.47977	-1.78181	3.76768	1.92551	-1.94738	-1.4468	-1.18894	-1.82532	-0.352275	-1.54105	-2.30233	-2.00852	-0.479851	0.854579	1.04657	2.03581	3.1919	-3.22772	-2.3914	-2.10842
HOXD8	3.78102	-2.33503	-2.20319	1.14122	-2.68227	-3.15035	-2.31448	3.69322	2.60746	1.95405	-2.91155	-1.10606	0.596183	-1.93792	-3.42323	0.858107	1.98644	-2.91325	-2.59325	-2.07952
HOXD9	-4.92539	-3.92107	-4.10904	-6.24096	-4.93263	-5.00081	-4.4445	-4.69004	2.39466	-1.60986	-4.98998	-5.05044	-4.82425	-4.13307	-5.44802	-4.89937	-5.79983	-5.60725	-5.10205	-5.32714
HPX	-3.47166	-2.79397	-2.71818	0.840026	-2.70558	-3.31334	-2.07687	-3.50871	-2.25062	-2.38752	-3.90491	-3.60515	-2.99326	-3.13279	-4.06928	-2.40104	1.75401	-4.18431	-2.52484	-3.89429
IGF1	-3.74282	-1.46627	-3.30995	-4.57541	-0.984712	-1.64619	3.16961	-3.00592	-2.79431	-1.43977	-3.37498	-3.78835	3.28713	-1.03335	-3.68953	-3.52969	-4.13238	-4.20007	-0.833534	-3.95721
IGSF6	-3.96702	4.04701	-3.08338	-5.23389	-2.5869	-1.43694	2.98183	-3.45278	-4.22094	-2.82078	-4.16712	-4.19532	-2.41963	-2.41402	-4.28458	-3.38242	-4.54094	-4.5925	4.11776	-4.23247
IL2RA	-3.73583	-3.25038	-2.69004	-3.94864	0.199283	2.12928	2.67265	-2.44528	-1.93949	-2.60033	-2.96833	-3.84881	0.647018	-2.7073	-3.73007	-3.14288	-4.79505	-4.27467	-1.79151	-2.54474
IL2RG	-3.46531	3.34426	-1.2927	-5.318	4.58538	3.48393	-2.10962	-3.31334	-0.526635	-2.83898	-3.92732	-3.99636	-3.15518	3.90616	-2.44673	-3.23338	-3.94489	-3.89938	-2.9689	-3.9179
IL3RA	-4.76099	1.61107	-3.64774	-5.86606	-4.32592	-5.44897	-4.44464	-4.32292	2.39529	-3.5244	-5.01925	-4.82253	-4.43503	-2.41063	-4.82547	-4.87418	-5.53884	-5.07555	-3.87626	-4.70754
IL7R	-3.64714	-1.00016	-0.221458	-5.35497	5.85436	0.329164	-1.846	-3.36228	-0.319981	-2.63968	-3.87789	-4.05577	-2.91879	-2.94909	-2.94239	-3.71076	-4.45799	-4.05043	-4.19128	-4.04788
ITGAM	-3.02456	2.85163	-1.73646	-5.20812	-2.59086	1.58997	3.47345	-3.34845	-4.08344	-3.12279	-3.30875	-3.78811	-2.39678	-2.91299	-2.03357	-3.29475	-3.28633	-2.82925	1.04629	-3.78981
ITGAX	-4.29795	4.5511	-3.4436	-5.83364	-4.05833	-2.51896	-2.43386	-4.11053	-5.09805	-4.33842	-4.59058	-4.68501	-5.0664	-3.87229	-4.26175	-4.3123	-4.74849	-5.05491	2.80486	-4.6689
ITM2C	-3.78429	-2.01102	2.91342	-4.38911	-2.27154	-0.943937	-1.51934	-3.00441	-3.13224	1.5141	-1.19949	-3.72416	0.54418	7.10976	-2.2958	-2.32843	-4.40629	-3.72839	-4.19512	-3.52439
JUP	-0.792915	-1.25099	0.43391	1.08637	-1.84223	-1.23097	0.49487	3.68203	1.53241	0.401929	1.61644	1.38439	-0.89194	-1.54126	2.0062	0.460224	3.08987	3.03222	-0.76862	3.61154
KARS	1.75597	1.58187	0.320967	1.14485	1.58257	0.0758459	0.47443	4.49691	0.917078	1.76249	-0.0600736	1.68474	0.125904	2.05793	-0.276642	0.0625483	1.55972	0.0120502	0.604962	3.02925
KDR	-4.48762	-3.20921	-2.88547	-4.56395	-4.29332	-4.90912	-4.09226	-3.01588	3.33386	-3.19018	-5.03914	-4.47217	-5.53462	-3.03989	-1.42212	-4.29664	-4.42196	-4.41672	-4.52912	-4.60506
KIT	-4.16654	0.983036	-2.03993	-5.94584	-2.56328	0.953592	2.37544	-4.00377	0.0454198	-1.10325	-4.22371	-4.44845	-0.0109049	-1.78684	2.45971	-3.87604	-4.87198	-5.06669	-3.94938	-4.4195
KLF5	-3.0766	-2.3267	-0.692843	2.58044	-2.48849	-1.88214	-2.51796	4.6292	-2.67892	-1.15186	-1.82936	-1.73596	-2.23686	-2.24638	1.54577	1.28014	3.51295	-0.574239	-2.16127	-2.20209
KLRB1	-4.17402	-1.81798	-1.37776	-5.63698	4.93506	-0.22941	-1.9824	-3.71956	-2.03401	-3.16764	-4.38743	-4.47264	-0.237673	-3.03429	-3.36811	-3.86965	-4.92289	-4.55169	-4.49465	-4.36167
KLRC1	-1.5826	-3.02419	-0.524716	-1.2693	3.40364	-3.36865	-3.01674	-3.30929	-3.39812	-4.15842	-3.89384	-3.20802	-5.21628	-3.75085	-2.5823	-2.81285	-1.9	-3.49297	-1.4152	-2.17354
KLRD1	-4.22179	-3.14484	-0.0109189	-5.84764	3.83369	-3.76449	-3.91112	-4.2766	-3.04321	-4.06968	-4.44149	-4.62668	-4.83658	-4.08135	-2.42176	-4.35711	-4.88573	-4.95464	-4.65407	-4.65459
KLRF1	-2.19396	0.896677	-1.91856	-1.16358	1.77165	-2.14661	-0.240939	-2.39797	-1.24371	-2.76302	-3.4893	-2.58546	-1.80555	-0.496428	-3.77095	0.890949	1.29749	-1.50291	-2.50377	-2.34475
KRT14	-2.84881	-3.85088	-2.0262	-6.02893	-4.09948	-3.82851	-3.89215	-3.40267	-4.70362	-3.4626	4.65304	-4.76547	-5.53329	-3.62519	2.71171	-4.08711	-4.71187	-4.92107	-4.8905	-4.6367
KRT15	-3.34128	-2.01824	-1.01488	-5.11462	-2.59249	-1.26303	-0.447801	-3.41957	-3.80191	-4.04436	3.03344	-3.94029	-0.992391	-1.37086	4.80706	-3.0042	-4.06356	-3.55366	-2.62571	-3.77479
KRT16	-4.109	-4.45493	-2.6401	-6.36425	-4.58773	-4.36381	-4.75328	-4.24841	-5.29344	-4.50113	2.9121	-4.50223	-5.76276	-3.98037	2.23202	-4.29741	-4.8928	-4.97127	-4.78008	-5.0003
KRT23	-4.24467	-1.88737	-1.53234	-5.77834	-0.783741	-0.677502	-0.0786024	-3.91434	-1.48201	-4.00289	-2.90528	-4.5519	-0.993756	-0.761707	3.66413	-3.74037	-4.48696	-4.84749	-3.44658	-4.51307
KRT5	-3.46841	-4.03297	-2.1975	-6.41025	-4.43332	-3.90461	-4.22265	-3.87845	-5.02777	-4.24958	4.00896	-5.03538	-5.87419	-4.04422	2.72903	-4.29592	-5.03177	-5.20116	-5.02142	-4.83267
KRT6B	-4.11275	-4.1332	-1.85184	-6.49116	-3.98741	-4.02313	-3.7792	-4.30506	-5.29467	-3.69185	3.60009	-4.91611	-4.93591	-3.70227	3.07368	-4.29461	-5.15658	-5.22271	-4.7236	-5.03898
KRT7	2.26693	-0.746572	1.38771	5.06954	-0.843171	-0.717387	-0.644585	6.19797	-1.08295	-0.757726	4.05931	5.17561	-2.28571	-0.577473	4.50287	2.38528	3.23473	6.44102	0.726943	3.16202
KRT8	5.14378	-1.00935	1.22377	4.14611	-1.16199	-1.21811	-1.01692	2.12775	0.544882	-0.399768	1.31312	4.58723	-2.32552	-1.08424	2.43037	2.84126	1.65615	6.09312	1.92771	0.996696
LAG3	-0.0908201	-1.60658	-1.04821	-0.333861	2.10582	-2.68718	-0.0756841	-2.52225	-2.23525	0.0509161	-2.99295	-2.88254	-0.507662	0.280725	-2.80894	2.21825	-2.05602	-3.01025	-0.56556	-2.27576
LARS	3.92173	2.44882	4.87269	3.19115	2.65406	2.56479	1.39086	4.42809	1.92225	1.85003	-1.03088	-0.0154973	0.833113	2.63116	0.656232	2.21695	3.1939	0.607452	1.4503	2.864
LDHB	-2.81397	2.98032	-0.519837	-3.76862	4.10963	3.54717	2.69491	-1.70147	2.64365	3.51811	2.27114	-2.84246	1.39723	3.20036	1.76071	-1.81173	-2.75905	-3.21989	2.25345	-2.59794
LEP	-3.33196	-4.73018	-4.04793	-3.3833	-4.43092	-4.73911	-3.86437	-4.23498	-3.71234	-5.17236	-5.25925	-4.06293	-1.01427	-4.23672	-4.69703	-4.17312	-4.54722	-3.81994	-1.4215	-3.61879
LGALSL	0.0355502	-1.14895	-1.20663	-0.363436	-1.88716	-0.396284	-1.16465	2.79013	1.08761	0.726658	0.487168	1.73469	-1.24714	0.583773	-0.0240712	-0.287351	-1.28283	1.05442	-0.370581	2.15079
LIF	-3.6537	-3.89078	2.45339	-5.09276	-0.953215	-1.52616	-0.192165	-3.56316	-4.53266	-0.107828	-4.40088	-4.14694	-1.21228	-3.62896	0.622856	-3.47288	-4.54977	-4.23283	-4.0607	-3.83609
LILRA4	-4.53036	3.62456	-4.10626	-5.659	-4.98267	-3.6717	-4.78849	-4.6917	-5.74794	-5.04618	-5.37616	-5.37483	-5.44066	-4.62488	-5.2284	-4.5845	-5.23406	-5.20678	-4.58647	-4.7876
LPL	-3.93494	-2.63458	-1.9696	-5.28515	-3.4535	-3.43488	-2.34286	-3.61438	1.59493	0.900157	-4.18629	-4.30334	1.41942	-3.40112	-0.183898	-4.01189	-4.43553	-4.62659	2.10982	-4.28543
LPXN	-1.27674	3.20246	2.87354	-3.34558	3.81272	3.12074	2.06986	-1.94707	-0.464002	0.885835	-1.11161	-2.63414	-0.943893	3.18565	-0.274518	-0.50264	0.56505	-2.86882	2.13129	-2.52551
LRRC15	-4.91309	-3.70381	-4.5112	-6.14972	-2.99378	-4.58433	-3.59782	-4.69569	-4.22577	3.66185	-4.33039	-5.02535	-0.697408	-4.14531	-5.1941	-5.12957	-5.59519	-5.52116	-4.98902	-5.28874
LTB	-4.42212	-3.26904	-2.71676	-6.07823	2.96413	3.24335	-4.08692	-4.27258	-3.56126	-4.45895	-4.48737	-4.76606	-4.68036	-3.96075	-4.24294	-4.59216	-5.11266	-4.80025	-4.88929	-5.03262
LUM	-1.02049	1.2788	-0.682305	-2.10506	2.73629	1.01888	1.52185	-0.646571	-0.526616	6.49676	-0.409609	-1.39089	4.86519	0.0536715	-1.29116	-0.858734	-1.42926	-1.41236	-0.97346	-1.08719
LY86	-4.17794	2.0912	-3.54587	-5.36416	-4.12822	1.39948	1.9532	-3.91114	-4.87683	-3.49931	-4.60412	-4.40131	-3.78081	-3.54424	-4.58919	-3.83948	-4.79701	-4.80966	1.57881	-4.44816
LYPD3	0.15025	-1.10063	0.04946	2.83272	-1.7472	-1.42307	-1.07848	-1.17367	-2.23721	0.353763	-2.33049	3.63054	-1.19338	-2.00445	1.15173	1.41368	3.93527	4.38257	-1.55328	3.3834
LYZ	-3.30369	6.72331	-0.412028	-4.88779	-1.52735	-0.546434	-0.0776123	-3.02322	-3.9177	-2.38511	-3.58822	-3.70465	-0.939392	-1.85167	-2.55757	-2.83809	-3.94894	-3.13164	2.2927	-3.28949
MAP3K8	2.35201	3.58426	4.27296	-2.15627	-1.51529	2.19105	2.92888	-0.94822	0.856947	-0.957807	-3.14883	-1.43595	-0.792654	1.19908	1.42499	1.02448	-1.43931	1.728	-0.733647	2.23561
MDM2	3.0642	2.58318	5.37665	3.43385	2.04266	2.01117	1.69396	5.47633	1.4626	3.47712	0.864831	2.68047	1.3016	4.02412	0.0497592	4.67296	2.43652	0.842776	2.43956	5.41404
MEDAG	-4.33412	-3.75381	-3.51963	-5.5472	-3.40989	-4.0827	-3.23233	-4.18809	0.426453	-2.52449	-0.00435448	-4.41034	1.59971	-3.69244	-3.78128	-4.62975	-5.03167	-5.08815	-4.5697	-4.79297
MKI67	-4.08849	-3.7657	-3.81531	-4.3786	-3.79031	-3.40637	-3.75566	-2.67807	-1.04067	-3.51799	-4.80711	-4.03875	-1.14174	-2.82959	-4.91172	5.2867	-4.67503	-4.97246	0.69456	-4.38015
MLPH	5.83264	-1.91189	-0.925014	4.69643	-2.12582	-2.06403	-1.37291	-1.21468	-0.65308	-2.00191	-2.50757	1.79456	-1.78019	-1.98961	-1.31298	0.782793	2.66714	3.78853	-0.324606	0.668234
MMP1	-3.57576	-4.15562	-3.2787	-4.53793	-3.80278	-3.95633	-4.25334	-3.20044	-5.00573	1.38111	0.697234	-4.1798	-4.65756	-3.86597	-4.21751	-3.52388	-1.82544	-3.01529	0.280164	-3.60636
MMP12	-4.86487	-4.78143	-4.40501	-6.37844	-4.86939	-4.10565	-4.97127	-4.81964	-5.3492	-4.96114	-5.1575	-5.05076	-5.32434	-4.30354	-4.56881	-4.83437	-4.77612	-5.3912	2.53184	-5.19845
MMP2	-2.85526	-0.90026	-2.46497	-3.43423	-0.786064	-1.52364	-0.228848	-2.21035	0.976083	4.32886	-0.973962	-2.83905	3.8148	-2.03176	-3.11238	-2.72314	-3.41635	-3.243	2.11126	-3.00143
MMRN2	-4.27366	-3.6769	-2.47362	-4.04572	-4.8665	-5.05417	-4.62017	-3.92427	2.86157	-4.00535	0.517081	-4.58819	-6.35916	-3.80908	-4.02549	-4.17639	-5.24027	-5.00175	-4.96979	-4.38847
MNDA	-3.98289	4.80107	-2.1424	-5.74984	-3.40329	-2.36649	2.34892	-3.69916	-4.54488	-2.88762	-3.60301	-4.38865	-2.40636	-3.42006	-2.97911	-3.952	-4.82803	-4.72523	-0.38665	-4.45061
MPO	-4.23803	-2.8717	-3.32953	-3.9319	-4.05519	-1.58189	-1.49987	-4.01949	-4.60066	-4.33361	-4.4352	-4.19636	-3.23861	-4.50933	-4.46139	-2.46991	-4.59772	-4.41745	-3.99619	-1.73305
MRC1	-4.08639	-1.0253	-3.17766	-4.9625	-3.95888	-2.39132	5.1145	-3.56699	-4.59992	-3.83121	-4.6636	-3.98896	-2.31801	-3.54317	-3.06984	-4.13124	-4.55239	-4.47772	-2.87074	-4.39529
MS4A1	-4.60458	-3.66629	-3.27146	-6.23058	-4.05165	3.6934	-4.14706	-4.54979	-4.59711	-4.16687	-4.63832	-4.94657	-1.86052	-3.97519	-4.43191	-4.91407	-5.4542	-5.18926	-5.1182	-4.95762
MUC6	-3.89335	-3.77874	-3.54562	-2.97641	-2.76997	-1.38568	-3.78671	-3.71117	-4.13167	-2.71874	-4.63931	-4.31961	-2.72768	-4.03216	-4.33385	-3.44918	-4.39348	-4.15306	-2.83912	-3.60948
MYBPC1	-2.2241	-3.12961	0.449834	-2.3114	-3.5189	-0.581325	-2.12972	-3.00831	-3.67544	-4.21392	-4.35128	-3.22206	-3.51494	-2.61115	-0.791128	-3.15621	-2.31564	-3.61521	-3.69393	-3.06332
MYH11	-4.06502	-4.68266	-4.42875	-6.94478	-4.73892	-5.06011	-4.85045	-4.13373	-1.94454	-2.58885	4.15768	-5.2954	-6.1248	-4.38278	-4.55253	-5.43023	-5.85679	-5.86959	-5.13089	-5.7295
MYLK	-2.79964	-2.94679	-3.12846	-5.86973	-3.29338	-3.8077	-3.05603	-3.01795	2.73745	1.29026	5.46673	-4.70803	-3.98031	-3.45366	-2.89968	-4.08947	-4.73819	-4.95471	-4.96361	-4.64637
MYO5B	0.287274	-2.2721	-0.56117	3.45919	-2.32703	-2.31146	-1.7022	4.27093	-1.46401	-2.53828	-2.06505	3.70969	-3.01869	0.78685	1.96391	1.56418	1.01293	3.99406	-0.497252	0.564239
MZB1	-3.0787	-3.90576	-3.63123	-4.96944	-4.63957	-1.79917	-4.44693	-3.47406	-5.1036	-4.62123	-4.73944	-3.5801	-5.11763	5.58578	-4.11605	-2.90209	3.82264	-3.95815	-5.08675	-4.11239
NARS	4.15766	2.84512	3.04123	3.41837	1.77114	2.47106	1.35112	6.01907	1.91158	2.29704	0.627244	4.1835	-0.103763	3.15635	1.34945	3.57356	3.38469	3.66165	2.48734	3.74958
NCAM1	-3.69354	-1.01106	-2.64306	-4.61576	0.394826	-2.86424	-3.41485	-2.15123	-0.683974	-2.95041	-4.32609	-3.12397	-1.86192	0.283278	-1.26187	-2.77625	-3.7054	-2.02611	-3.56136	-1.41086
NDUFA4L2	-4.52451	-4.60308	-3.52246	-2.1113	-4.46917	-4.64813	-4.81438	-3.91847	0.080833	-1.68767	-4.55115	-4.18686	-5.60283	-0.718249	-3.81441	-4.47786	-4.84863	-4.34435	-3.89889	-3.72064
NKG7	-4.49127	-0.115981	-3.29984	-5.86962	3.11073	-3.99368	-3.93539	-4.19614	-2.87406	-4.42163	-4.42173	-4.55258	-4.81608	-3.61284	-3.17525	-4.28066	-5.11187	-5.29345	-3.9564	-4.78936
NOSTRIN	1.42138	-3.89904	-3.42202	-5.74482	-4.54425	-4.52685	-4.68242	-4.12442	2.52792	-4.15224	-4.21707	-3.84195	-6.20352	-3.79802	-2.00174	-4.30535	-4.86017	1.58136	-4.55934	-4.13893
NPM3	0.852357	-0.0405622	-0.199535	-0.373529	-1.28011	-1.86613	-2.33113	2.93681	-1.30703	0.368147	-0.591536	0.480735	-1.44416	-1.95276	-3.08811	1.21883	-3.00966	0.459185	-1.42981	-1.19848
OCIAD2	-1.64105	-2.04943	-0.879781	1.03386	2.18659	1.18097	-2.58855	3.68488	0.662801	-2.54011	0.420454	1.70851	-3.57241	1.0534	0.907503	-0.0980071	1.46967	2.84068	-0.274291	3.3286
OPRPN	-4.33939	0.0797994	-3.27993	-6.05421	-2.86907	-0.514867	-2.37803	-4.17332	-2.06085	-4.2415	-2.78148	-4.53005	-0.353629	-0.91859	2.31946	-4.33771	-4.70439	-5.26661	-1.59613	-4.61363
OXTR	1.44669	-3.81931	-2.56404	0.25197	-3.7456	-3.61286	-3.93752	0.155138	-0.669493	-0.557062	2.17162	-2.16017	-5.17268	-2.4036	-4.06214	2.20268	-3.48588	-2.54993	-3.76612	-2.74469
PCLAF	-3.21595	-3.26958	-3.07887	-2.71194	-3.67337	-3.1398	-3.44785	0.745566	-0.752849	-3.02716	-4.4692	-3.7173	-3.00646	-2.97158	-4.50869	6.27061	-3.01554	-3.92843	0.731154	-3.51512
PCOLCE	-3.19955	-3.69409	-2.94871	-1.30918	-3.59702	-4.18301	-3.67195	-3.07702	-2.01272	2.29939	-3.48762	-3.17041	0.687075	-3.66048	-3.8629	-2.12394	-1.13159	-3.91796	-4.31905	-3.83762
PDCD1	-5.08965	-5.22847	-4.72502	-4.82022	0.21112	-5.08011	-4.99542	-4.58903	-5.08409	-4.90946	-5.99749	-4.49932	-5.6422	-4.59349	-5.54937	-5.09894	-5.34513	-4.8409	-5.44413	-5.2151
PDCD1LG2	-3.56914	0.746234	-2.88062	-5.10148	-2.81176	1.13815	1.78191	-3.62481	-1.64763	-0.101096	-3.4807	-3.80505	-1.15083	-0.477841	-3.67835	-3.36069	-3.43346	-3.79216	-0.309465	-3.8392
PDE4A	-3.05119	2.02237	2.96284	-3.90018	1.67494	0.643957	-0.00887513	-2.52988	0.524743	2.0721	-3.5229	-2.16152	-0.250427	2.132	-3.05334	-2.43391	-4.29567	-1.5402	0.605698	2.20982
PDGFRA	-3.56218	-1.83993	-0.528661	-4.97377	-1.8358	-2.60009	-1.7449	-3.28995	-3.27925	0.483938	1.9591	-3.77286	3.52803	-3.21848	1.26109	-3.5672	-3.99751	-4.10661	-4.33117	-3.91106
PDGFRB	-4.13095	-2.31757	-3.79835	-5.39753	-2.38357	-3.79921	-2.19088	-3.64744	-1.36717	5.138	-3.56857	-4.33867	1.63128	-3.33093	-4.37386	-3.91946	-4.51236	-4.54044	-4.50371	-4.27267
PDK4	-2.27622	-0.011181	2.49403	-1.91687	-1.60985	-0.831346	5.99883	-1.91241	2.82305	-1.73562	-3.08616	-2.60844	2.07836	-1.78007	1.33229	-1.7634	-2.93418	-2.47837	-2.2146	-2.16755
PECAM1	-3.72778	2.78272	-3.0807	-5.05471	-0.469004	-0.186433	3.44586	-3.30454	4.28585	-2.08549	-4.46772	-3.94955	-3.16483	4.82286	-4.00894	-3.09901	-4.16962	-4.16486	2.16303	-3.77827
PELI1	-2.8746	-0.61126	4.20743	0.555335	-2.31353	2.5813	2.75792	3.28988	1.71005	1.00659	-1.91661	2.02338	-3.39466	2.86835	0.241806	-1.02979	-3.54051	-0.815364	-0.0181238	0.270728
PGR	1.40089	-3.3717	-3.16961	-5.54485	-3.45463	-3.13839	-3.6179	-3.84235	-1.82176	0.0447071	1.43013	-4.404	-0.637988	-3.6874	-4.19694	-4.06379	-4.33945	-4.66251	-4.06251	-4.61156
PIGR	-4.73563	-0.560536	-2.64922	-5.92996	-4.14274	-0.988086	-3.14557	-4.48631	-3.90623	-4.96309	-5.37043	-4.92641	-3.49816	-2.86173	1.77832	-4.65356	-5.40256	-5.33614	-4.74239	-4.85178
PIM1	-2.54544	1.3831	2.62946	-3.64966	3.47891	1.12334	-0.557995	0.77903	-0.170739	2.48829	-1.3868	-2.25021	0.60704	3.04332	0.54226	2.6692	-3.1979	-2.44645	1.49229	-2.34683
PLD4	-4.44386	2.45159	-3.34122	-5.90583	-4.70717	1.81651	-3.7251	-4.57734	-4.98005	-4.24953	-3.98858	-4.62665	-3.9273	-4.01845	-3.19008	-4.36716	-5.10727	-5.03328	-3.63646	-4.75917
POLR2J3	4.62544	3.71874	6.90122	4.49693	4.46715	4.47209	3.08888	2.08179	3.04087	2.4375	-0.0187869	0.603232	1.85918	4.38765	-0.404923	4.82833	3.67681	1.70069	2.73041	3.61798
POSTN	-2.10577	0.00383452	-1.60204	-2.86955	0.886571	-0.402871	1.02339	-1.48398	-0.755227	6.78395	-0.511212	-2.17948	3.87008	-0.766571	-2.03142	-1.63759	-2.57768	-2.42802	-1.69651	-2.0311
PPARG	-3.12755	-2.53132	-2.46615	-0.32641	-2.36072	-2.36914	0.299767	3.59121	2.54908	-2.21688	-3.97036	-2.82273	0.997885	-2.37043	-3.73677	-1.01093	-2.79916	-1.72719	2.14183	-2.09565
PRDM1	-3.65201	0.477029	-2.31426	-5.45848	4.00489	0.16292	1.44721	-3.44164	1.40409	2.71075	-1.32564	-4.12167	-2.55663	5.11706	-2.76168	-3.29971	-4.29962	-4.28653	0.517685	-4.02059
PRF1	-3.98846	-3.36445	-3.67187	-5.68122	3.15296	-4.06025	-3.83602	-4.24192	-2.48152	-3.7827	-4.28255	-4.31909	-3.79769	-4.23942	-4.02818	-4.06596	-4.98846	-4.87363	-4.44941	-4.43895
PTGDS	-3.81517	0.739029	-3.2445	-5.33675	-0.808132	4.03694	-0.138664	-3.62817	1.41694	-2.17939	-3.45859	-4.20804	3.41209	-1.78974	-3.78866	-3.55054	-4.10396	-4.24005	-4.29689	-4.1113
PTN	-3.51376	-2.85884	-1.22813	-5.69859	-2.89905	-3.0958	-2.58928	-3.45191	-1.5246	2.13046	3.80149	-4.28467	0.582384	-2.71531	3.66491	-3.5638	-4.30941	-4.52086	-3.81139	-4.19124
PTPRC	-3.00488	4.81958	-0.998538	-4.44542	5.40453	4.23133	3.63469	-2.62808	-3.72538	-2.33264	-3.47552	-3.26484	-3.44367	-0.951332	-2.64622	-2.44003	-3.5716	-3.10088	-0.609709	-2.95506
PTRHD1	-2.34	1.82215	-1.96318	-0.278844	-1.5655	-0.84539	-1.36211	4.99977	-0.154398	1.04238	-2.85564	0.372278	-2.90643	-2.28173	-3.43119	-0.706799	-2.48247	-0.817041	-2.378	2.53231
QARS	3.5826	1.22526	1.35573	2.90465	1.75048	2.43412	2.28822	4.4929	1.61048	2.55622	1.2118	3.70028	0.952693	2.2251	1.11308	2.73627	3.11113	-1.21679	1.29376	1.21707
RAB30	1.08202	0.349332	2.34542	-0.447785	-2.07784	2.14854	-1.63574	-1.22628	0.617795	1.82072	-0.179121	-2.01661	0.150141	4.24925	-0.188025	-0.213039	2.06757	1.19686	-1.41909	-0.921833
RAMP2	-4.79563	-2.77981	-3.76072	-4.90271	-3.723	-4.74343	-4.02674	-3.66545	3.27376	-2.42627	-5.04991	-4.63598	-4.33435	-3.18448	-5.00803	-4.56999	-5.3419	-5.12527	-5.13163	-4.7858
RAPGEF3	-2.14887	-3.43327	-1.79111	1.32485	-3.99514	-3.95956	-3.84688	-3.28387	1.7153	-4.22381	-0.304224	-3.07337	-3.28954	0.973637	-3.28606	-2.25432	-0.668464	-3.69809	-1.68953	-3.1231
REXO4	-0.588646	-2.64001	2.25745	-0.333817	-0.510628	0.040608	-1.20845	0.451408	-0.926415	-2.94224	-3.21252	-3.07467	-1.74819	-0.89169	-2.64136	-0.623923	-0.168532	-2.09503	-2.20248	-1.13364
RHOH	3.82075	-0.894924	-1.77751	2.86745	3.27116	2.62034	-1.58002	0.253262	-2.78988	-2.48619	-2.84996	-0.296518	-0.406057	2.84506	-2.51214	3.81378	2.63242	-2.87351	0.420194	-1.2212
RORC	-2.35582	-3.27432	0.28016	-1.98703	1.55521	-0.520221	-2.22966	-0.970674	-3.77731	-3.77155	-3.01329	-1.22351	-2.06031	-2.5846	-0.258805	-2.3148	0.865085	1.0313	-3.1715	2.69117
RTKN2	-2.54025	-3.0423	-1.00653	-2.64718	-1.82916	1.41861	-2.88747	-2.06764	-3.00638	0.150759	-3.88208	-2.88855	-2.22565	-2.95847	1.32832	5.09417	2.93526	-1.75247	-2.50387	-2.77904
RUNX1	-0.91673	0.16049	7.55994	-3.63443	-0.144236	-0.869125	1.19739	-2.00826	-4.25846	1.08892	-0.603095	-1.96478	-2.07934	-2.21685	-3.34434	-1.24732	-3.17005	-2.24116	-3.22709	-1.11016
S100A14	2.1995	-1.66807	-0.589842	-1.24234	-1.5503	-1.48382	-1.2906	2.80695	-1.95938	-1.19409	2.67784	5.19174	0.0547387	-1.173	-0.526552	0.139249	4.04526	5.2542	1.25658	-0.215528
S100A4	-1.92953	4.27199	-0.848648	-3.76055	4.90895	0.920863	0.223862	-1.58648	1.69885	2.73764	1.30603	-2.32664	1.62787	2.11348	-0.182751	-1.72975	0.743433	-2.58172	2.23019	-2.56621
S100A8	-4.79835	1.93933	-2.5935	-6.17237	-4.16468	-4.43209	-4.26924	-4.6318	-1.92637	-4.41098	-5.09581	-4.90002	-3.58814	-4.03229	1.70533	-4.58403	-4.98513	-4.69013	-0.147466	-4.78401
SCD	0.132813	-1.19151	-0.580443	1.10958	-1.45952	-1.23433	-1.00928	0.089093	-0.66053	-0.581586	-1.79988	7.8952	-1.89238	-1.20111	-1.54664	0.889495	1.93559	0.324675	3.80889	1.05508
SCGB2A1	1.16816	-3.85015	-3.53658	-4.6757	-3.8247	-4.18504	-3.15848	-3.38792	-4.75144	-4.86663	-5.01719	-3.26911	-4.27813	-4.01596	-0.237769	-3.97176	0.47378	-4.33821	-4.35284	-4.45878
SDC4	-1.69733	-0.283433	0.441057	2.06994	-1.83622	0.322642	-0.16009	0.0995652	-2.39618	-3.5067	-0.216819	-0.231182	1.01167	-2.21131	1.59053	2.57706	2.9456	-1.60431	0.6492	0.916425
SEC11C	-1.59343	-0.188225	0.336932	1.55957	-1.14648	1.65153	1.15108	5.35158	0.666768	-1.78826	-0.490758	3.26645	-2.45721	5.76366	0.385031	0.545511	0.81397	1.98469	0.372821	-0.905656
SEC24A	3.26481	1.1553	4.17124	2.25417	0.76454	0.3842	0.304113	3.8518	0.79237	2.67236	-1.819	3.90294	-1.03816	4.61141	0.363901	1.51379	3.27997	0.796969	1.32878	3.58314
SELL	-3.77691	-1.75216	-1.89416	-5.68412	-2.93952	4.60787	-2.67882	-3.85963	-1.04146	-3.55903	-4.00639	-4.24047	-0.490437	-3.39852	-3.84182	-4.02578	-4.73844	-4.38231	-4.42295	-4.51148
SERHL2	-2.32775	-2.2706	-1.84385	3.68211	-2.4018	-1.85652	-2.03081	-0.581394	-0.551112	-1.75879	-3.60439	0.548651	-0.154473	-2.18392	-2.95338	-0.149752	-1.72409	4.6268	1.4459	0.301422
SERPINA3	6.71224	-0.680104	-0.939728	-4.97085	-1.19193	-0.979527	-0.453294	-2.94322	0.175455	-2.70698	4.18264	-3.8625	0.115777	-0.949544	3.49397	-2.34924	-1.29492	-3.23237	-2.42446	-3.12584
SERPINB9	2.21769	4.10809	3.53161	-2.38526	3.72514	3.25691	-0.204378	-0.434708	1.54822	1.86868	-2.08203	-1.19663	0.743724	1.68906	-1.57282	2.09547	1.16065	2.31296	-1.23155	3.27138
SFRP1	-3.15804	-2.29283	-1.43306	-5.39453	-2.52055	-2.77403	-1.55867	-3.49828	-3.51977	-3.72759	3.7627	-4.07406	2.752	-2.07682	4.29971	-3.29731	-3.57778	-4.29225	-4.02085	-4.11788
SFRP4	-3.79858	-1.30476	-3.50525	-4.71222	-1.38941	-1.87966	-0.797088	-2.79812	-3.48632	-2.44465	-3.55286	-3.90585	3.79544	-3.32674	-3.64156	-3.75929	-3.93969	-4.17155	-4.22905	-4.03935
SH3YL1	-0.763571	-2.36157	4.25394	2.61407	-1.04503	-1.30409	-1.64164	5.44331	-2.1571	-1.72331	-1.69238	-1.85258	0.020729	-2.19624	1.72772	3.72853	3.13695	-0.292213	-2.77407	-1.01538
SLAMF1	-2.71683	-2.8889	-0.721739	-3.21572	3.83365	1.69365	-2.67678	-2.72281	-1.18098	-3.56433	-3.90337	-3.31191	-1.43596	3.34671	-3.46975	-2.60067	-1.46783	-3.45763	-3.69446	-3.12182
SLAMF7	-4.44025	3.59776	-2.92758	-6.22666	-1.43972	-0.704427	-3.3419	-4.218	-5.19221	-3.96405	-4.59697	-4.94605	-3.49182	5.65902	-3.71977	-4.39435	-5.04722	-4.97276	0.379941	-4.75843
SLC25A37	-3.11547	-0.974856	4.6407	1.18517	-1.95951	-0.470995	-2.34701	-1.80562	0.208333	-3.72938	-2.20927	-2.4173	-4.07166	-2.105	2.19503	-1.13553	-3.64767	-3.79181	-2.32173	-2.74634
SLC4A1	-3.51919	-3.33037	0.835683	-1.62942	-1.40306	-2.29259	-3.03939	-2.65306	-2.85044	-4.16671	-3.94475	-3.94198	-2.85246	-3.05352	-4.05164	-3.90637	-2.38542	-2.79228	-1.58034	-2.84088
SLC5A6	3.6964	-0.572897	3.93688	2.59885	-0.778868	0.985664	0.119294	2.40131	-0.387506	-0.582682	-2.61957	-1.41596	-0.973353	1.462	2.16444	3.33853	2.32086	3.06895	-0.462667	0.278902
SMAP2	1.87536	3.50228	2.6742	1.52533	3.31596	4.06444	3.77085	1.02932	0.52796	-0.784834	-1.17384	1.60045	-3.32492	3.4011	-0.308507	-0.457925	2.24192	-2.03348	-2.60994	-0.435892
SMS	4.36733	0.462961	0.27849	2.02525	-0.723453	-0.188124	1.90064	5.69116	0.311905	1.94522	-1.26118	3.37217	-0.706647	-0.833604	1.76717	3.86191	3.47386	2.50837	3.27781	1.06594
SNAI1	-1.65445	-3.44542	-2.80296	-1.89534	-3.60656	-3.7825	-4.21394	-3.23118	0.841684	1.01159	-4.49299	-3.4611	-5.03973	-3.17591	-1.62145	-2.97697	-1.3303	-4.18502	-1.21115	-3.83574
SOX17	-3.46967	-4.02784	-3.29952	-3.03419	-4.29427	-4.26429	-4.50584	-3.73975	2.01565	-4.0077	-4.33963	-3.71532	-5.64781	-4.03991	-4.16874	-3.409	-1.37639	-3.88517	-3.12415	-4.13095
SOX18	-4.85149	-4.57445	-4.18307	-4.27983	-4.11996	-4.14332	-4.69212	-3.79403	1.26132	-4.43209	-5.35836	-4.36466	-3.37459	-4.18807	-5.41722	-3.97428	-5.45556	-0.356792	-5.2063	-4.42144
SPIB	-4.12802	-2.60215	0.212187	-4.39601	-4.78515	3.22193	-4.41027	-3.21839	-4.78053	-4.86044	-4.87535	-3.57638	-2.24048	-3.48347	-4.07691	-3.15002	-4.54704	-4.47272	-4.72664	-3.93571
SQLE	0.00786203	-0.0310462	-1.61687	1.63554	-0.0814553	1.87119	0.197219	3.68431	0.825519	2.24499	0.728715	4.4097	-2.09899	2.01299	-1.75846	3.60275	-0.905106	2.99767	-1.71496	3.18634
SRPK1	3.0403	0.208688	4.43073	2.03782	2.49964	2.1461	-1.35535	4.57624	1.03979	-0.0242249	-1.45807	-0.748491	-1.69395	2.52864	0.873088	4.07316	2.83082	-0.654037	0.219569	2.18217
SSTR2	-3.14149	-2.79394	-2.60195	-3.10052	-2.88658	-1.95634	-2.91006	-3.47306	-0.467411	-0.0204184	-3.09262	-3.23433	-2.1796	-0.682607	-4.06316	-3.22343	-3.88265	-4.35624	-0.749455	-2.9805
STC1	-4.207	-4.31374	-3.38218	0.540064	-4.64604	-4.57577	-4.5187	-3.24499	0.990982	-4.92453	-4.94883	-2.88797	-6.2848	-3.75045	-1.51781	-1.28329	-5.38404	-4.90735	-4.31579	3.22432
SVIL	-1.20385	0.668546	4.98378	2.00942	1.2433	0.0899356	-1.62021	0.382875	2.20684	3.90348	2.66858	-1.65596	1.50926	-1.26945	2.60972	3.07248	1.60676	2.61865	-3.02006	-0.485144
TAC1	-2.89714	-3.57583	-2.16453	-1.61277	-3.31783	-3.97627	-3.74687	-3.29369	-4.14934	1.91191	-4.20535	-3.41841	0.711231	-3.12762	-3.45232	-3.29944	-1.56197	-3.71416	-3.03508	-3.02058
TACSTD2	2.79168	-1.09409	1.29569	2.34859	-1.75757	-1.48573	-1.03193	-0.859508	-2.12458	-1.61017	3.00722	3.17727	-2.36353	-1.13728	4.47416	1.08552	5.47578	6.30224	-1.13944	0.873362
TCEAL7	-3.18112	-3.47452	-2.51378	-3.0444	-2.95977	-3.60146	-3.32528	-3.14324	-1.33847	1.75968	0.733458	-3.8449	0.181174	-3.0285	-3.23987	-3.69153	-4.10516	-4.12006	-3.85575	-3.76141
TCF15	-5.13979	-3.67842	-3.80492	-4.18407	-3.64196	-4.23594	-4.00616	-4.21233	-0.919327	-3.98442	-5.47761	-4.5693	-4.00386	-4.23533	-5.17003	-4.36536	-4.78629	-4.77019	-3.55143	-2.16144
TCF4	-3.84099	2.2471	-3.0078	-5.21569	-2.1971	2.53086	1.38767	-3.41583	2.955	3.40738	-2.54539	-4.02739	1.66537	2.75292	-3.71549	-3.36761	-4.13811	-4.14923	-3.18303	-4.0924
TCF7	-3.98497	-2.90458	-1.88466	-5.65947	3.61134	2.14337	-3.00662	-3.69752	-3.3554	0.811146	1.37903	-4.15674	-1.69779	-2.88441	1.12902	-3.90289	-4.65928	-4.81822	-3.81078	-4.39563
TCIM	-1.58277	-1.14802	-0.941995	4.00143	-1.60535	-2.13333	-1.61958	-0.411847	3.04694	3.72193	-2.69642	-1.16111	1.06566	-1.34309	-2.41098	0.184439	-1.59003	4.98219	0.0413712	1.03095
TCL1A	-3.553	-3.39553	-3.3674	-3.73368	-4.71382	1.99091	-3.98741	-3.56496	-3.14149	-4.52261	-3.09616	-4.24175	-1.70557	-3.91181	-5.27214	-3.91908	-4.65383	-4.11188	-4.75776	-3.62214
TENT5C	-2.20134	-3.18865	-2.63423	-0.357774	-3.30622	-0.435946	-3.17545	-1.70598	-4.13075	-3.58567	-3.5958	4.01765	-3.98268	5.92693	-3.86482	0.216418	-3.78972	-2.86068	-3.4837	5.4963
TFAP2A	0.0407274	-2.63582	-0.0128192	2.45055	-2.89421	-2.57372	-2.60174	4.4112	-2.95868	-0.350068	-0.505239	0.798817	-3.5677	-1.51172	0.974111	1.4165	3.73722	-1.21381	-0.638408	3.22469
THAP2	1.30103	0.386462	3.04885	0.700535	0.446346	1.22092	-1.08653	2.64812	-0.075592	0.997624	-0.888102	-1.68226	-1.09049	1.31027	-1.12989	1.06834	0.930927	-0.445223	-0.642886	2.41378
TIFA	2.2895	1.82361	0.939686	-2.89443	1.86743	2.43697	-1.55293	3.37277	-0.461004	-0.40998	0.623326	-1.62043	-1.65273	3.60145	0.677384	3.3996	-0.588483	-3.11799	-1.5919	-2.5632
TIGIT	-4.04473	-3.87284	-1.92559	-5.604	3.32489	-0.531732	-4.24965	-4.23871	-3.95352	-4.70052	-4.73725	-4.55997	-3.7723	-4.10372	-4.04772	-4.40889	-4.83164	-4.75335	-4.63545	-4.69789
TIMP4	0.555084	-3.00805	-2.45627	-1.97682	-3.33237	-3.20364	-2.52209	-0.705161	0.125377	-0.175739	-2.57405	0.0818076	0.323504	-2.74406	-4.27661	-2.81356	-2.10963	-3.78366	-1.40842	-2.51606
TMEM147	3.94545	1.39128	0.977672	2.72328	0.971754	0.65375	1.7581	5.04727	1.44822	2.90318	1.11779	-0.563094	0.580029	3.61475	0.765659	1.47406	3.04872	0.983362	1.40503	4.24556
TNFRSF17	-5.25051	-5.00015	-4.44734	-6.53637	-5.38341	-2.21152	-5.2756	-4.97407	-5.92454	-5.5071	-4.99173	-5.29985	-3.63958	3.94891	-5.23855	-5.17655	-5.71184	-5.72848	-5.33008	-5.48642
TOMM7	4.49676	3.89354	2.24078	3.41432	4.32129	4.08834	2.88177	6.47042	2.90198	3.5713	3.41685	4.75071	2.94826	3.70425	2.65962	2.97981	3.33787	1.52793	0.644262	3.28637
TOP2A	-3.32048	-3.89057	-3.5998	-4.64055	-4.17624	-3.43711	-4.1261	-2.52558	-0.307743	-3.64396	-4.59203	-3.42495	-5.298	-3.19047	-4.38281	6.18918	-4.17226	-4.67134	0.944703	-4.26333
TPD52	4.14145	-0.704197	-0.26357	2.9125	-0.106897	2.91348	-1.38605	5.22529	-1.52638	-2.26821	0.919906	4.67753	-3.4352	5.25279	1.74042	4.042	4.3943	4.14998	-0.14341	-0.0382664
TPSAB1	-4.28338	-3.02925	-3.457	-5.54358	-3.11013	-2.32788	3.39373	-3.91788	-4.11508	-4.0343	-4.48377	-4.17919	-0.824854	-2.68357	-4.28827	-3.72214	-4.55229	-4.81066	1.92188	-4.34321
TRAC	-3.19347	-1.1037	0.807716	-5.04042	5.57826	0.624773	-1.60848	-2.97041	-1.67652	0.196685	-3.18534	-3.87631	-0.0264257	-2.56498	-3.17969	-3.08255	-4.29845	-3.74475	-3.96568	-3.74162
TRAF4	2.07419	-1.86686	3.82153	2.85677	-2.37196	1.64031	-1.86834	1.76874	0.122038	-0.876769	-0.568264	-0.868147	-1.50331	-1.34134	0.274802	0.911029	0.668458	3.1102	-2.36372	4.41518
TRAPPC3	2.96313	2.70471	4.56646	1.85545	2.31127	2.07119	2.19362	4.08305	1.94353	2.42627	1.88592	0.0666212	0.189328	3.04175	1.87256	2.94541	3.14149	2.86773	1.06829	0.859568
TRIB1	2.22481	1.89357	2.93998	1.32415	-2.26041	0.821802	2.41793	-1.25399	0.685567	-1.17868	0.411636	-1.8197	-1.61525	4.03625	1.65609	0.555633	1.37228	3.18442	1.07069	0.0854935
TUBA4A	-0.465624	-0.430638	1.21908	-1.87568	3.7816	1.71065	1.37196	4.47884	1.47967	2.03493	1.57507	0.910317	-2.50368	3.09612	1.37032	4.7999	2.4646	1.3473	1.16866	-1.83796
TUBB2B	-0.577017	-1.71602	-0.93967	-1.61257	-0.941447	-0.0904731	-0.853559	2.41274	-0.525647	-0.416775	1.0322	1.37059	-1.15702	-1.32151	1.2405	1.40092	1.08614	2.6747	0.0256527	1.59449
TYROBP	-4.10703	2.55833	-3.10396	-5.49391	-2.5135	-0.619263	2.91911	-3.81157	-3.63148	-3.2475	-4.06081	-4.2757	-1.35124	-2.51919	-2.83623	-3.8179	-4.74807	-4.73219	1.99058	-4.29411
UCP1	-3.16084	-4.07723	-3.22453	-3.6728	-2.69772	-2.99901	-3.01974	-3.81108	-3.35619	-4.28714	-3.85905	-4.63455	-2.82635	-2.52349	-5.07898	-4.03525	-3.93672	-4.59302	-4.21432	-3.81092
USP53	-1.66562	1.02405	2.93706	3.35781	0.627509	2.04981	0.814142	0.759205	0.771531	-1.52417	0.390521	-0.603906	1.36058	1.74145	1.7229	1.06457	2.6191	3.76197	0.817385	0.742997
VOPP1	1.71256	3.61311	0.674929	2.87695	2.33356	3.81353	2.39963	4.48644	1.85065	3.11441	0.950293	2.06046	0.61726	4.40848	-0.723829	2.87373	3.71052	1.92482	0.286231	0.722054
VWF	-3.70784	-0.81198	-2.7696	-1.9967	-2.31199	-3.42763	-2.43478	-1.77596	4.33529	-2.38352	-4.1692	-3.27091	-2.3287	-1.98995	-3.64042	-2.92228	-4.30661	-3.63342	-2.46986	-3.28925
WARS	2.27252	4.09805	3.50032	1.79088	2.10519	0.473318	-1.8371	4.43838	2.22938	2.84965	1.19248	1.9969	-2.11164	3.59525	1.07746	0.669478	-0.200034	2.5765	-0.402334	1.3665
ZEB1	-3.59003	1.59385	-2.73114	-4.76837	2.49059	-0.59028	-0.997025	-2.98601	2.62697	4.01831	0.750858	-3.73674	0.781074	2.02714	-3.7819	-2.97973	-4.142	-4.04213	-2.06513	-3.49134
ZEB2	-2.6808	4.70651	-1.84805	-4.07921	2.35887	3.2803	4.65428	-2.38814	3.17582	4.19672	-1.89014	-3.107	2.13477	-0.64636	-2.64174	-1.87735	-3.03867	-3.03362	2.2767	-2.69617
ZNF562	3.22514	2.76696	4.81205	2.87279	1.11599	0.549829	2.43495	3.00463	1.31134	-1.32151	0.852367	-1.23657	-2.58011	1.9286	0.531816	2.9278	2.26017	3.13728	-0.248415	1.62034
