# Supplementary material for: Deciphering Microenvironmental Heterogeneity by Scalable Niche Guided Module Discovery
Source: Research Square preprint supplement (doi:10.21203/rs.3.rs-7243521/v1), 2025-08-25
Supplement: Supplementary file 10 [file Supplementary Table S6-S9.xlsx]

## Sheet: S6
Supplementary Table S6: Niche scores in the AD dataset
Index	NIche1	NIche2	NIche3	NIche4	NIche5	NIche6	NIche7	NIche8	NIche9	NIche10	NIche11	NIche12
1	0	0.458909	0	0.0585194	0.0858351	0	0	0	0	0	0	0
2	0.210836	0.0956754	0.101917	0.0590613	0	0.257725	0.0385334	0.127781	0.320459	0.00231635	0.261754	0.0984508
3	0.521218	0	0.0439674	0.0400019	0.298627	0.0953333	0.145425	0.116775	0.192914	0	0	0.148124
4	1.10333	0.227067	0.0522325	0	0.412544	0.222933	0	0.194445	0.188452	0.0606197	0.45343	0.167425
5	0.312802	0	0.0332714	0.0460129	0	0.231035	0.00522238	0	0.166783	0.0209412	0.306885	0
6	0.6915	0	0.203826	0.0323448	0	0.00466274	0.0503035	0	0	0	0.363588	0
7	0.53526	0	0.0445617	0.0227349	0.159428	0.00674425	0.10338	0.17518	0.0301631	0.0285928	0.404318	0.169419
8	0.487164	0	0.365363	0.0378071	0	0.0975774	0.0170012	0.183803	0.225002	0.04249	0.37992	0.0953028
9	0.387852	0	0	0.055525	0.24028	0.168455	0.00471217	0	0.0811376	0.0221878	0.0174406	0.106604
10	0.274105	0.276271	2.12772e-05	0.0236386	0.234033	0	0.037151	0.184062	0.128893	0	0.161333	0
11	0.0511728	0	0.0213551	0.0412372	0	1.04692e-05	0.0579898	0	0.0514821	0.0127214	0.0107127	0
12	0.459742	0.664953	0.711324	0.0110165	0.241711	0.150407	0.0212952	0.0995236	0.0912917	0.157237	0.0132802	0.0351021
13	0.627598	0.401148	0.127247	0.0295994	0.129095	0.135308	0.113972	0.000135537	0.345626	0.0268505	0.0863027	0.106589
14	0.503867	0.213187	0.174469	0	0.334577	0.136135	0	0.110384	0.167913	0.011027	0.327273	0.164754
15	0.309936	0	0.153173	0.0122686	0.177414	0.0777482	0.0662127	0.0957163	0.412723	0.00318634	0.033585	0.200049
16	0.309064	0	0	0.129411	0.123201	0	0.133029	0	0	0.0927269	0.0150243	0.146908
17	0.413541	0.277019	0.0668911	0.00912172	0	0	0.137648	0	0.200884	0.0180579	0.0633857	0
18	0.497123	0	0.542215	0.0605888	0	0.228471	0	0.000996332	0.20979	0.171415	0.00253	0.0748234
19	0.559439	0.0474614	0	0.0033951	0.554879	0.212105	0	0.395661	0.0732219	0.0318801	0.607586	0.0831207
20	0.530752	0	0.419987	0.0308653	0.316594	0.172798	0	0	0	0.0946038	0.298511	0.101556
21	0.0706823	0.242273	0.212437	0.00964432	0.0203225	0.00151022	0.0232447	0	0.182576	0	0.0218096	0.0667356
22	0.194544	0	0.0839529	0.0476596	0.457224	0.0866071	0.0115649	0	0.148282	0.0349027	0.0971159	0.136957
23	0.592535	0.509378	0	0.00945314	0.37104	0	0.0231984	0.176189	0.323664	0.0603474	0.329141	0.111545
24	0.36961	0.0547259	0.182578	0.0454683	0.0162182	0.0744961	0.00888987	0.0802552	0.211355	0	0.409047	0.141828
25	0.512824	0	0.0334776	0.0409064	0.230299	0.096551	0.00510679	0	0.393841	0.242861	0.0359741	0.159216
26	0.275513	0	0	0.147018	0.1102	0	0.013106	0.000211223	0.0897334	0.044606	0.000972048	0.198447
27	0.0998246	0.112104	0.0315241	0.0471619	0.307128	0	0	0.265017	0.0877097	0.0409517	0.335113	0.096013
28	0.154275	0.168812	0.00618881	0	0.175591	0.220233	0.0998456	0	0.246559	0.101773	0	0.178248
29	0.266197	0.0472035	0.0283649	0.0195766	0.30448	0.096537	0.0803388	0	0.196569	0	0.0529271	0.106552
30	1.08912	0	0.107229	0.00781877	0	0.29364	0.00337858	0.240726	0	0	0.273038	0
31	0.124615	0.102872	0	0.10043	0.496036	0.0960107	0	0	0.195628	0.0363417	0.0804757	0
32	0.357363	0.447546	0.295822	0.0236542	0.262888	0.15589	0.0162584	0.106168	0.222371	0.091257	0.265888	0.049787
33	0.220844	0.486822	0.330142	0.0887986	0	0	0.138709	0	0	0	0	0.0587004
34	0.137441	0.379261	0.278706	0.0361658	0.204417	0.145069	0.136641	0	0.118901	0	0	0.118124
35	0.348506	0	0.149839	0.107655	0.187589	0.141417	0.0878246	0	0.250126	0	0.0663916	0.169876
36	0.790794	0.372574	0.175229	0.0238842	0	0	0.0794982	0	0	0.0562932	0.0148257	0.0887883
37	0.542321	0.491196	0.575649	0.0197279	0.164461	0.267231	0.051323	0	0.112408	0.154687	0.0462746	0.080401
38	0.367598	0	0.204168	0.0282332	0	0.104858	0.14837	0	0.132238	0	0.0882823	0.0783881
39	0.375257	0.623459	0.297228	0.031361	0.176357	0	0.0541583	0	0.179705	0.0400225	0	0.113482
40	0.419506	0	0	0.0378345	0.650639	0	0	0.00207878	0	0	0.41144	0.131665
41	0.434137	0.228538	0.816361	0	0	0.129641	0	0.181035	0.120081	0.21614	0.0337102	0.0706951
42	0.157039	0.362903	0.105563	0.0480458	0	0	0.158128	0	0.200563	0	0.0758836	0.180741
43	0.54313	0.100018	0.371707	0.00907343	0.137562	0.25867	0.046923	0.08226	0.13729	0	0.318644	0.168512
44	0.209971	0	0.0164541	0.13616	0.463742	0.109216	0	0	0.142037	0.034609	0.046857	0
45	0.189432	0	0	0	0	0.0100392	0	0.290666	0	0.0767163	0.315822	0
46	0.557631	0.512547	0.137329	0.000509866	0.164413	0.163621	0	0.109549	0.20715	0.234129	0	0.0416334
47	0.146181	0.191977	0.10017	0.303286	0.241927	0.0796696	0.0862479	0	0.0948082	0	0	0
48	0.127303	0.749339	0.521196	0.0225153	0.141148	0.202504	0	0.100287	0.0409644	0.275476	0.0172355	0.0414689
49	0.488898	0.242571	0	0.0570993	0.187639	0.136133	0.18805	0	0.412956	0	0	0.144056
50	0.28059	0.585901	0.509975	0.0288693	0.140597	0	0.0728232	0	0.221176	0.0527562	0	0.0818676
51	0.286962	0.28691	0.588334	0.0483259	0	0.000943515	0.0326179	0	0	0.0131858	0.146476	0
52	0.46988	0	0.127874	0	0.481519	0.136309	0	0.336401	0.165431	0.00767315	0.53888	0.195584
53	0.280369	0.380377	0.145198	0.00880289	0.75408	0.168902	0.0771494	0	0.234408	0.0212472	0	0.0720105
54	0.259356	0.237766	0.300026	0	0	0.26349	0	0.233121	0	0	0.218038	0
55	0.10255	0	0.0460148	0.125209	0.079645	0	0.0589736	0	0	0.0340079	0	0
56	0.362386	0.281327	0.551629	0.00449893	0.145868	0	0.0867107	0.0830493	0.175397	0.0109736	0.17807	0.115647
57	0.488142	0.114351	0.0925668	0.079304	0.336938	0.0951281	0	0.104239	0.281513	0	0.266386	0.19386
58	0.0824008	0.582765	0.838931	0.04596	0	0.0925851	0.0270484	0	0.0690231	0.00210285	0	0.0688984
59	0.225452	0.0986394	0.00562852	0.0747911	0.00855615	0.238705	0.0465465	0	0.142744	0	0.0191	0.0950641
60	0.17015	0.120886	0.407241	0.0108344	0.371779	0.208924	0.120883	0.233651	0	0.0119469	0.224571	0
61	0.0734354	0.234972	0.534531	0.0908601	0.370152	0.137701	0.0547768	0.301981	0.125421	0.0725758	0.229357	0.0805756
62	0.333099	0	0.728562	0.0128169	0	0.000727002	0.0300668	0	0.220974	0.061813	0.0407685	0
63	0.217429	0	0.0957344	0.153802	0.00788974	0.0980569	0	0	0.00428372	0	0.01552	0
64	0	0	0.108675	0.288657	0	0.128666	0	0	0	0	0	0
65	0.318814	0.156046	0	0.0306663	0.190979	0.000302378	0.0960088	0	0.393077	0.0148856	0.0180993	0.115934
66	0.404703	0.327574	0.0496462	0.0180203	0.0970369	0	0.152948	0	0.314459	0.052446	0.0532719	0.101153
67	0.0771559	0.266865	0.131263	0.0279779	0.176661	0.171844	0.0303033	0.192114	0.213867	0	0.45012	0.13568
68	0.421013	0.297735	0.0521212	0.00553416	0.459796	0.208512	0.00660654	0.10342	0.138142	0.0296218	0.353304	0.175356
69	0.5964	0	0.248668	0.183417	0.187345	0.225371	0.0464202	0	0.260351	0.0404015	0.243016	0.081574
70	0.521468	0.466048	0.168003	0.0873248	0.020689	0.111063	0.0341727	0	0	0.0394793	0.0166683	0.0869329
71	0.455513	0.152682	0.0372354	0.00299512	0.553058	0.143345	0	0	0.123674	0.0181606	0.580903	0.107509
72	0.417489	0.279663	0.285211	0.0360912	0.39047	0.0750944	0.048097	0.094184	0	0.0181599	0.288232	0.0378894
73	0.341807	0	0.337073	0.263561	0.192521	0.00115419	0.0447469	0	0.068436	0.00288845	0.113746	0.0553537
74	0.242886	0	0.0626941	0.00500443	0	0.0030802	0.0393489	0	0.189386	0.0245118	0.197379	0.113593
75	0.508225	0.217633	0	0.044671	0.173837	0	0.00303502	0.142479	0.078482	0	0.167424	0.166586
76	0.262691	0.156022	0.191561	0.00286259	0.0708903	0.0017401	0.0960384	0	0.307445	0.0393439	0.0351641	0.102573
77	0.11711	0.164608	0	0.068352	0.233014	0.00120373	0.0616638	0	0.133818	0	0.0597768	0.0936232
78	0.0711834	0.346113	0.190123	0.0749346	0	0.097629	0	0	0.27315	0.0433893	0	0.10905
79	0.384706	0.545629	0.713272	0.00897669	0	0.109115	0.0506275	0.00081224	0.13352	0.0120222	0.00892118	0
80	0.0739454	0	0.288718	0.0490955	0.238023	0.00226181	0.00561195	0	0	0.031297	0.0781083	0
81	0.197926	0	0.0119721	0.0236402	0.336283	0.0701107	0.0132566	0	0.0934448	0.00376719	0.0162629	0.0520631
82	0.116792	0.179513	0.176299	0.030189	0.0491331	5.60296e-06	0	0	0.0365775	0	0	0
83	0.393661	0.744761	0.184022	0.012928	0.0799511	0.12812	0.0403779	0.0822634	0.219872	0.0911357	0.101744	0.184972
84	0.411559	0	0.199568	0.00966166	0.222319	0	0.2082	0	0.23848	0	0.0130291	0
85	0.413998	0.102328	0	0	0.339807	0.277724	0	0.247724	0.0784799	0.00917034	0.58697	0.191874
86	0.548385	0.624366	0.161429	0	0	0	0.163333	0	0.501088	0.0577742	0.0549131	0.204276
87	0.500854	0.136602	0.011332	0.0209568	0.327328	0.000142818	0.036407	0	0.21881	0.0195615	0.0584978	0.0556936
88	0.233917	0.0200306	0.224985	0.0957003	0.224412	0.000409409	0.058733	0.0903131	0.304896	0.0185778	0	0.120346
89	0.311602	0	0.207252	0.0483224	0.177245	0.108029	0.119985	0	0.442506	0.0127816	0.067687	0.262629
90	0.455818	0.222373	0.0828447	0.0221362	0.24662	0.218556	0.034225	0.199297	0.16329	0	0.41862	0.132485
91	0.0865579	0.240074	0.134599	0.00431598	0.0992994	0.00115122	0.0380007	0	0.0426901	0	0	0
92	0.22973	0.221558	0.138356	0.100614	0	0.165639	0.0361269	0.000290598	0.081382	0.0256835	0	0
93	0.0428723	0.427245	0.0539473	0.191143	0	0	0.169753	0	0	0.0408791	0	0
94	0.199611	0.0565043	0.27612	0.123836	0	0.0970876	0.0539957	0.000126151	0.137903	0.0456245	0	0.0782379
95	0.0961383	0	0	0	0	0.00793081	0.12649	0	0.0444154	0.184228	0.649845	0
96	0	0.287527	0.230039	0	0	0.00633035	0	0.28954	0.000666338	0.171351	0.30592	0.0337444
97	0.238285	0.09569	0.055315	0.0303119	0.106084	0.0677371	0	0	0.0995435	0	0.222419	0.0541662
98	0	0.0727756	0.180565	0.0899369	0	0.0864139	0.0400939	0	0	0	0	0.0732018
99	0.264232	0.191531	0.0228283	0.115192	0.268268	0.00200636	0.182301	0	0.259596	0	0.122098	0.0635678
100	0.172439	0.438913	0.753205	0	0.0630928	0.287387	0.0268821	0.00180139	0	0.277119	0.0025201	0.046439
101	0.271434	0	0.00777526	0.0110432	0.173358	0	0	0	0.0828458	0.0816357	0.384475	0.137698
102	0.111088	0.0443686	0.284697	0.271997	0.165997	0.190402	0.0650242	0.0999509	0.0832814	0	0.016022	0.0961641
103	0.547977	0.684624	0.0470432	0.0482333	0.170812	0.336566	0.0801065	0	0.106828	0.0757123	0.111669	0.232326
104	0.481539	0	0	0.00870854	0	0.229387	0.00361315	0.29133	0.135547	0.169556	0.0643468	0.17708
105	0	0.321796	0.177944	0.110673	0.298944	0.136084	0.0198099	0.000895418	0	0.0245208	0.0183044	0.106455
106	0.231376	0	0.596093	0.0470758	0.20703	0.102336	0.0184434	0.259108	0.158156	0.0205542	0.264012	0
107	0.0787689	0.302057	0.0445569	0	0	0.0883391	0.122931	0	0.0551912	0.0497247	0.0656389	0
108	0.383062	0.0803724	0.359619	0	0.427112	0.153805	0.0754686	0.130193	0.253778	0	0.418841	0
109	0.399266	0.639644	0.0536921	0.0535118	0	0.236198	0.132403	0	0.191818	0.037615	0	0.164152
110	0.125155	0.114002	0.116739	0.206824	0.367177	0.104506	0	0	0.0960256	0.0100265	0	0
111	0	0.329974	0.0525057	0.227503	0.00384307	0.185495	0	0	0	0.0172176	0	0.048895
112	0.451998	0.427419	0.307034	0.0380913	0.0317073	0	0.0346619	0	0	0.0432423	0.060033	0.113492
113	0.0518884	0	0.194722	0.119724	0.580619	0	0.00341622	0	0.21903	0.0668011	0.117857	0.0445444
114	0.685565	0.186191	0.0477261	0	0.544282	0.083244	0	0.343614	0.168947	0.0728561	0.346512	0.0467486
115	0	0.279949	0.107384	0.174456	0.243969	0.282075	0	0.263418	0.0166289	0	0.286741	0.0684487
116	0.676659	0.33055	0.0279558	0.0260937	0.0373895	0.214289	0	0.225069	0.183085	0	0.40907	0.142562
117	0.345792	0	0	0	0.17741	0.00204712	0.0170858	0.162712	0.0756307	0.0298451	0.38169	0.0451443
118	0.283683	0	0.131649	0.178976	0.00842485	0.095984	0.0236968	0	0.148702	0.037062	0.0288229	0.0503255
119	0.562121	0.549037	0.0894662	0.0294149	0.348249	0.231754	0.0286765	0.204116	0.264282	0	0.208144	0.0459643
120	0.0897613	0.101714	0.218582	0.0859545	0	0.0565424	0.0628862	0	0	0.0285022	0	0.0822649
121	0.344454	0.0866015	0.475554	0.00392645	0	0.000739072	0.0145488	0.0762011	0.164396	0	0.229723	0.0860584
122	0.276005	0	0.0730357	0.0672615	0.29886	0.000875275	0.0268289	0.099081	0.0112845	0.00218247	0.0384575	0.112684
123	0.205001	0	1.21111	0.0594145	0.236009	0.280903	0	0.000268394	0.0516166	0.165989	0.0389494	0.0537659
124	0.525065	0.136822	0.016516	0.078501	0.303866	0	0.0113038	0.119729	0.221183	0	0.324285	0.0980665
125	0.237012	0	0.234982	0.0691527	0.238885	0.235247	0.0525512	0	0.203597	0.214279	0.0347552	0.0616044
126	0.36714	0	0.172709	0	0	0.400297	0.00323188	0	0	0.0416982	0.455698	0.145217
127	0.146594	0.504131	0.0645618	0.0352613	0.207527	0.175643	0	1.89166e-05	0.141338	0.162196	0.0155824	0
128	0.850782	0.592398	0.194487	0.0267382	0	0.00304034	0.0746566	0.0865179	0.2007	0.0174744	0.258915	0
129	0.440755	0.205541	0.137657	0.0928425	0	0	0.0966085	0	0.103838	0.0078665	0	0.0735653
130	0.377039	0	0.0690913	0.0418824	0	0.000414084	0.0790821	0.254101	0.106614	0.0288475	0	0.0766862
131	0.14103	0.863837	0	0	0	0.167973	0.0371923	0.112022	0.510318	0.099497	0.0610201	0.112248
132	0.375706	0.0608062	0.141311	0.0462975	0.289225	0.0847169	0.0106345	0	0.172685	0.00951192	0.441477	0.0604055
133	0	0	0.0153598	0.0271142	0.0938222	0.139556	0.0893394	0.169075	0.159039	0.0746326	0	0.130271
134	0.448234	0.223048	0.084518	0.0422174	0	0	0.155634	0	0	0.0162018	0.0610817	0.170856
135	0.207015	0.588271	0.465992	0.0476412	0	0.00127572	0.0700738	0	0	0	0.128404	0.0830744
136	0.507968	0.993913	0.0295088	0	0.0703795	0.0649666	0.0435692	0.14324	0.357076	0.167385	0.0581837	0.0702193
137	0.249249	0.34354	1.2612	0.0289561	0	0.217285	0.00376045	0.18844	0.0757537	0.165194	0	0.0280579
138	0.257591	0.40914	0	0.0528028	0	0.000893472	0.101706	0	0.141213	0	0.017287	0
139	0.251559	0.171735	0.282964	0.0858342	0.223746	0.0806584	0	0	0.139555	0	0.078549	0.102985
140	0	0	0.122637	0.38628	0	0	0	0	0.10127	0.015115	0	0
141	0.205457	0.117226	0	0.00292713	0.068494	0	0.103246	0	0.0898681	0.00999123	0.042748	0
142	0.489068	0.414378	0.251961	0.0369603	0.19696	0.0770857	0.100966	0	0.311945	0.0354156	0	0.138424
143	0.0921665	0	0.00759674	0.254305	0.179813	0.0815144	0.0759691	0.0778502	0.0372292	0	0	0
144	0.0367424	0	0.113133	0.401924	0.210927	0	0	0	0	0.0229452	0	0.0254956
145	0.146818	0.239879	0.223803	0.0226867	0.580965	0.195044	0	0.0969684	0.190304	0	0.473267	0.0894332
146	0.23899	0.428786	0.56736	0.00327538	0.289888	0	0.0472207	0.000598274	0	0.00940389	0	0.164281
147	0	0	0.408653	0.249669	0	0.156616	0.0101037	0.178113	0.247678	0.00632143	0.122176	0.107575
148	0.271095	0.452014	0.167205	0.0744462	0.067295	0.116792	0.0430617	0	0.427978	0.0392403	0	0.147612
149	0.236875	0	0.492618	0.162958	0.132216	0	0.0249367	0	0.113645	0.0517156	0.0667667	0.113233
150	0.135111	0.121755	0.130574	0.0233184	0.11179	0	0.0140053	0.130752	0.0585204	0.0130572	0.271582	0.0514908
151	0.27251	0.0616546	0.179313	0.0122116	0.604005	0.261656	0.027209	0	0.0906977	0.0303334	0.0462854	0.14563
152	0.294618	0.155508	0.353839	0.0520235	0	0	0	0	0	0.0439537	0.00376662	0
153	0	0.00483651	0	0.0693828	0	0	0.0166406	0	0.00449638	0	0.0100528	0.0642769
154	0.394347	0.62422	0.172082	0.0100419	0.188297	0	0	8.84187e-05	0.103809	0.00486012	0.0727307	0.0980013
155	0.488808	0	0.0342207	0.00306533	0	0.306232	0.033362	0.145809	0.041134	0.094026	0.475612	0
156	0.579387	0	0.0133733	0.0126736	0.511316	0.140793	0.00209818	0.195087	0.263876	0.0283873	0.606422	0.132674
157	0	0	0	0.0236107	0	0.000192353	0.0150846	0	0.000796717	0	0.292937	0
158	0.548077	0.19371	0.00354697	0.024444	0.249319	0.1086	0	0.217877	0.105609	0.00219835	0.431427	0.0793343
159	0	0.00354985	0.0655439	0.0471378	0.152141	0.136861	0.00801231	0	0.143545	0.0596037	0.000486499	0.0885771
160	0.169939	0.786447	0.724368	0	0	0	0.0541868	0	0.163201	0	0	0.0957115
161	0.483322	0.209286	0.0639664	0.00410296	0.165928	0.170067	0.124063	0.0982391	0.315797	0.0555152	0	0.0909207
162	0	0.221805	0	0.0286938	0.296633	0	0.00436648	0.196148	0	0	0.323442	0.0869157
163	0.148463	0.243501	0.234373	0.00196943	0.245405	0	0.0857632	0	0	0.0484751	0.0740779	0.0617244
164	0.15787	0.627695	0.0813238	0.0782457	0	0.236559	0.137319	0.000230838	0.19058	0.000434596	0.00409251	0.0696908
165	0.489001	0.0495092	0	0	0.0890732	0.000267289	0.0652274	0.335723	0.0236483	0.0789242	0.538773	0
166	0.724592	0.0664392	0.58814	0	0	0.263784	0.0081752	0	0.206828	0.0327269	0.353729	0.233846
167	0.173131	0.072886	0.14482	0.0531712	0.0171496	0.00192518	0	0.0871213	0.0972964	0.0798649	0.0197153	0.0354987
168	0.523188	0.15003	0.0506122	0.00246218	0.469543	0.175985	0.0296416	0.0765198	0.338309	0.0832776	0.287255	0.0691083
169	0.569121	0.372331	0	0.0316169	0.432497	0	0	0.131411	0.233379	0.0373353	0.351472	0.217144
170	0.180915	0.268046	0.0263502	0.0310242	0	0.00422471	0.0212461	0	0	0.00532482	0.09382	0.0763102
171	0.112594	1.01456	0.179572	0.0496804	0.217006	0	0.0262305	0	0.200769	0.0210649	0.0137121	0.0556666
172	0.310498	0.659063	0.119931	0.0532978	0.00184535	0.0888821	0.118406	0.101112	0.191523	0.0251808	0	0.143346
173	0.162138	0	0.0262936	0.0488691	0.287326	0.101981	0.253071	0	0.375506	0	0.0724581	0.285652
174	0.61647	0.246807	0.0209846	0.0338348	0.118537	0.185452	0.158868	0.198591	0.264433	0.084032	0.0164747	0.228675
175	0.227373	0.172661	0.102726	0.0021625	0.277933	0	0	0	0.0811363	0	0.152328	0.0894218
176	0	0.0196953	0.128865	0.41191	0.322744	0	0	0	0.044936	0.0318378	0	0.0765366
177	0.209516	0.154595	0.00060101	0.0261608	0	0.00240844	0.0202904	0	0.0650986	0	0.121434	0
178	0.0877414	0.255088	0.28653	0.0239384	0	0.199365	0.0484738	0	0.279862	0.0132529	0.00711045	0.0628532
179	0.557124	0	0	0.139844	0.336662	0.229663	0.0238715	0	0.279994	0	0.344896	0.184648
180	0.525328	0.499803	0.147242	0.00526774	0.314481	0.10385	0	0.110989	0.202726	0.00960021	0.358445	0.16396
181	0.684034	0.367695	0.0291875	0.0177972	0.430876	0.114346	0.0671788	0	0.200857	0	0.426017	0.155045
182	0	0.0155122	0.0376452	0.163486	0	0	0	0.000548852	0	0.0328699	0	0
183	0.328776	0	0	0.104435	0.025309	0.132009	0.0377226	0	0.0829523	0.0085143	0.0272283	0.0974342
184	0.131054	0.31267	0.177242	0.0414963	0	0.0662805	0.00300847	0.198532	0.0817463	0.0655844	0.329918	0.179412
185	0	0.401211	0.367358	0.111274	0	0	0.120575	0.000465482	0	0.0589943	0.0537043	0.0558048
186	0.141696	0.106565	0.0998115	0.0465405	0.234612	0.0019953	0.0517697	0	0.078774	0	0.0776155	0
187	0.198072	0	0.117866	0	0	0	0.156273	0	0	0	0.217886	0
188	0.190743	0.222512	0.0450315	0.0110365	0.14989	0	0.0757982	0	0.244548	0.0160144	0.0988825	0.291231
189	0.929332	0.282198	0	0.0786484	0.431053	0.187171	0	0.3492	0.0836596	0.00940491	0.421122	0.114931
190	0.197356	0.40583	0.0423825	0.0162596	0	0	0.0549719	0	0.260527	0.0235609	0.0606044	0.0596466
191	0.354616	0	0	0.131281	0	0.459386	0.145828	0	0	0	0.0723309	0
192	0.420938	0.138793	0.272533	0.0242256	0.252896	0.155773	0.0586914	0	0.138941	0.0873212	0.023595	0.0562869
193	0.555866	0	0.0536079	0	0	0.389014	0.00112117	0.000812716	0	0.026998	0.141461	0
194	0.387467	0.945189	0.76426	0.0870553	0.176244	0.0978843	0	0	0.287339	0.0309055	0	0
195	0.233124	0.179606	0	0.0970441	0.577934	0.182389	0.00412478	0	0.105326	0.0337823	0.0868902	0.0384635
196	0.301813	0.125375	0.0558739	0.0283319	0.323611	0.0902706	0.0082401	0.178333	0.137726	0.0173839	0.409265	0.122941
197	0	0.497887	0.0359094	0.0846223	0	7.60472e-05	0.0877017	0	0	0.0363129	0	0.00103976
198	0.126014	0.342815	0.163292	0.0478973	0.252249	0.102557	0.120005	0	0.101477	0.0257575	0.0638045	0.180171
199	0.262448	0.68673	0.183229	0.236078	0.138386	0.107344	0.052456	0.0689026	0.0996967	0	0	0.0444987
200	0.178513	0.521597	0	0	0.318493	0	0.310772	0	0.281116	0	0.0594389	0.162776
201	0.347625	0.183851	0.109299	0.0411843	0.337494	0.300979	0.0214048	0	0.11014	0.0340724	0.324882	0.139403
202	0.361603	0	0.198089	0.194991	0.261788	0.286341	0.0347802	0	0	0.0481535	0.067021	0.118732
203	0.281648	0.121853	0.0347858	0	0.18126	0	0.0276535	0.278043	0.168012	0	0.496878	0.0724034
204	0.00539203	0	0.607035	0	0	0	0.0815492	0.000627223	0.00670543	0	0.188208	0
205	0.277059	0.538978	0.182383	0.0085515	0.393871	0.11612	0.0114296	0.121664	0.217384	0	0.29357	0.143215
206	0.285936	0.638291	0.537441	0	0.164752	0.147976	0.015589	0.171733	0.183147	0.208723	0	0.0674495
207	0.40524	0.761281	0.0114824	0.0016702	0.097942	0	0.0591455	0	0.190175	0.068194	0.187131	0.17356
208	0.317058	0.148304	0	0.0221225	0	0.130666	0.0298895	0	0.170665	0.0606227	0.264015	0.0782955
209	0.482621	0	0.343933	0.033929	0	0.257983	0.0209393	0.100099	0.376657	0.208779	0.0271606	0.0442636
210	0.450685	0.362933	0	0.150785	0.218576	0	0.0592989	0.149784	0.251851	0	0	0
211	0.364092	0	0	0	0	0.265995	0	0	0.0381111	0.0504916	0.59419	0.163418
212	0.185872	0	0.0737005	0.0636171	0.241504	0	0.106204	0	0.101344	0.00378443	0	0
213	0.141507	0.260247	0.0358754	0.0243102	0	0.179245	0.0281536	0	0.0501588	0.0182743	0	1.46759e-05
214	0.552238	0.362724	0.105439	0	0	0.113786	0	0.129974	0.303569	0.272483	0.00949162	0
215	0.218214	0.531771	0.220739	0.0666851	0.177577	4.98374e-05	0.0786608	0.110419	0.116564	0.0369262	0.0692894	0.131753
216	0.230202	0.0547247	0.123699	0.0259019	0.409504	0.131558	0.0352912	0	0	0	0.313873	0.118308
217	0.315235	0.10191	0.0678274	0.318293	0.447697	0	0.0956594	0.122961	0	0	0	0.061526
218	0.321891	0.260312	0.141958	0.176776	0.497055	0.00094699	0	0.101765	0.119368	0	0	0.0833562
219	0.607585	0.14658	0.0667618	0	0.261534	0.214103	0.00869133	0.386163	0.209756	0.0270945	0.448357	0.0984254
220	0.164463	0.199466	0.0207319	0.0663141	0.0168082	0.0990002	0.00514193	0	0.174464	0.0179243	0.0313922	0.0924112
221	0.598453	0.172313	0	0	0.25791	0	0	0.125846	0	0	0.366445	0.168153
222	0.279193	0.82616	0.125546	0.0571484	0.0883192	0.15209	0.0802036	2.98294e-05	0.0706485	0.0454804	0	0
223	0.138483	0.907412	0.439287	0.0832073	0.0660122	0.0812415	0.0837248	0.0929681	0.106096	0.0336665	0.00301845	0.104922
224	0.71892	0	0.0834747	0	0	0.190092	0.187719	0.0918355	0.234533	0.0540451	0	0.0963726
225	0.337523	0.16214	0.382273	0.0673039	0.0510867	0.319783	0.0308833	0.0674261	0	0.21916	0.00811831	0.0483862
226	0.137495	0.0633909	0.341523	0.128252	0.28983	0	0	0.207114	0.128498	0.0256849	0.382046	0.0775084
227	0.451055	0.168482	0.0390002	0.0870205	0.580662	0.13165	0	0.153932	0.229907	0	0.24902	0.120361
228	0.150891	0.176987	0.114533	0.0311766	0.0687758	0.135253	0.0951297	0.16127	0.236412	0.0279088	0.00943233	0.211217
229	0.47063	0.539512	0	0.0260254	0.0155489	0	0.1476	0	0.224904	0	0.00177957	0
230	0.191231	0.26922	0.538013	0.0390323	0.0957499	0	0.02367	0	0.128075	0.0675116	0	0.0932389
231	0.418005	0	0.286789	0.113925	0	0	0.096426	0	0.127998	0	0.349731	0
232	0.289221	0.118856	0.114592	0	0	0.182149	0.0146131	0.157919	0.0684928	0.0737284	0.600365	0.0361916
233	0.294116	0	0.153353	0.0739372	0.747755	0.104541	0	0	0.0842517	0.0154578	0.0482582	0.0671546
234	0.210365	0	1.08059	0	0.197009	0	0.101527	0	0.0085221	0.00880522	0.162943	0.117253
235	0.296532	0.322906	0.0301496	0.0396205	0	0.0708508	0.0898279	0	0.358636	0.0519818	0	0.173381
236	0.267647	0.0093422	0.476825	0.114193	0.200866	0	0.0208477	0	0	0.0681922	0	0
237	0.692205	0.0645961	0.0356695	0.0137326	0.575462	0.166167	0.00560319	0.302682	0.13636	0.061634	0.486194	0.158823
238	0.0934955	0.00824641	0.0706979	0.0383708	0	0	0.0623014	0.0980844	0.359537	0.0612034	0	0
239	0.182534	0	0.184986	0.206346	0.346273	0	0	0	0	0.0163604	0	0.0474768
240	0.262041	0.289253	0.0701302	0.0802412	0.11044	0	0.136171	0	0.160011	0.0104137	0	0
241	0.124368	0.22431	0.33235	0.0953446	0.248476	0.00259656	0.00754031	0	0.0840468	0.0200727	0	0.0597887
242	0.472143	0.0789128	0	0	0	0.107301	0.0177829	0	0.107802	0.0201258	0.301075	0.159098
243	0.172232	0	0.0216818	0.0255632	0.112791	0.0793608	0.133072	0	0	0.0304022	0.031109	0.173754
244	0	0.205245	0	0.0959485	0.290463	0	0.0863457	0	0	0.0540672	0	0.0261213
245	0	0.111171	0.0637142	0.108676	0.26694	0.213591	0	0	0.141067	0.0838141	0.00513322	0.0659278
246	0.284057	0.0504969	0.207517	0.0501871	0.0020676	0.0957515	0.0486578	0.122703	0.26727	0	0.369221	0.127074
247	0	0.149561	0.0254233	0.137873	0	0.000121147	0.0481281	0	0.055054	0.00286908	0	0
248	0.253226	0.632026	0.37286	0	0	0.183397	0	0.106629	0.0566803	0.22616	0	0.0784761
249	0.436995	0.129523	0.0179943	0.0986086	0.359576	0.00407583	0.0173398	0	0	0.0365611	0.0299575	0.0732175
250	0.258416	0	0.449083	0.0772857	0	0.16976	0.0268403	0.199503	0.0724756	0.152317	0.0401623	0.0982672
251	0.337867	0.148786	0.0770184	0.0153978	0.341154	0.0769212	0	0.262062	0.149697	0.0505503	0.468901	0.190243
252	0	0	0.0318312	0	0.264824	0.273433	0.0339962	0	0	0	0.000919618	0.233016
253	0.29642	0	0.0486657	0.0294331	0.658021	0.107822	0	0	0.300143	0.0150467	0.0611157	0.131883
254	0	0.12628	0.150294	0.0386452	0.262239	0.179808	0	0	0.177667	0	0.0279	0.0647619
255	0.191386	0	0.151227	0.12288	0.457168	0.102805	0	0	0.176947	0.0064604	0.10732	0.0714146
256	0.262585	0.801978	0.965343	0	0.278219	0	0.0516093	0.143718	0.108119	0	0	0.133481
257	0.541432	0.249456	0.231827	0	0	0.248296	0.0208239	0	0.172086	0	0.417983	0
258	0.225902	0.242504	0	0.0253358	0.359563	0	0	0	0.315825	0	0.554091	0.140965
259	0.50422	0.349261	0	0	0.366299	0.219545	0	0.145349	0.06809	0.0795711	0.66037	0
260	0.124649	0.421817	0.317657	0.100581	0.279405	0	0	2.36571e-05	0.0842598	0	0.0516343	0.09305
261	0.636099	0.0905599	0.0648978	0	0.578704	0.293899	0	0.286663	0.053742	0.1037	0.358357	0.203016
262	0.811305	0.911085	0	0	0	0	0.0404855	0.275427	0.331135	0.1326	0.0444824	0.312623
263	0.221345	0.400216	0.0782593	0.0107228	0.149521	0	0.165685	0.171326	0.113702	0.00885609	0.00182325	0
264	0.36117	0.737711	0.516657	0.000980843	0.246195	0.317867	0.0309913	0.130813	0.268126	0.103322	0.0542142	0.051755
265	0	0.725755	0	0	0	0.000108536	0.0862673	0	0.234133	0	0.374091	0.130042
266	0.164172	0.27135	0.251188	0	0.174043	0	0.0663671	0	0.247441	0.0580411	0.00626484	0.11785
267	0.258967	0.0599452	0.0421642	0.101982	0.060863	0.173451	0	0	0.189289	0.0251687	0.119207	0.226622
268	0.103657	0.225167	0.297851	0.0681093	0.239601	0.164491	0	0	0.132618	0.0561243	0.00128538	0.0928355
269	0.344788	0.295697	0.131464	0	0.191217	0.000368861	0.0220711	0.0579616	0.114908	0	0.164244	0.109608
270	0.341765	0	0.772626	0.00989059	0.313226	0.360332	0.0628386	0.000554508	0.244838	0.221663	0	0
271	0.321196	0.132183	0.17742	0	0.40563	0.13872	0.023991	0	0.130259	0	0.415556	0.14367
272	0.164511	0.265831	0.0208713	0	0.180549	0	0.231953	0	0.252725	0	0.0656758	0.197144
273	0.314784	0	0.0890264	0.102314	0.195257	0	0	0	0.201045	0.059703	0.0906722	0.062062
274	0.29602	0.0192908	0.0139837	0.0155874	0.150169	0	0.0589289	0.00172018	0.183336	0.0111862	0.0575465	0.137269
275	0.385984	0.180129	0.0770039	0.0733848	0.254225	0.15464	0.050935	0	0.139585	0.0154556	0.0927201	0.134873
276	0.460795	0.391078	0.536933	0.0158146	0.177248	0	0.134952	0.000172333	0.0809915	0.0834344	0.00485948	0.0712679
277	0.466274	0.448836	0.0929202	0.124932	0	0.113551	0.0768531	0.173835	0.192791	0	0.0913903	0.178155
278	0.255038	0.362972	0.0293331	0.0556723	0.123997	0	0	0	0.224681	0.0976354	0	0.143053
279	0.22949	0.24134	0.0292734	0.123125	0.0941381	0.100562	0	0	0.0872052	0.0889462	0.0481302	0
280	0.216056	0.29945	0.00470928	0	0.429812	0.149574	0	0	0.0932363	0.0325139	0.189664	0.0518915
281	0.101355	0.122641	0.129539	0.0119372	0.73314	0.0897396	0.0352267	6.64112e-05	0.0279878	0.0571884	0	0
282	0.34351	0.15524	0.201639	0.0677779	0.426286	0.163513	0	0	0.241468	0	0.0433759	0.0613861
283	0.52213	0.348052	0.0466528	0.0213913	0.177443	0.0849532	0.0909016	0	0.16274	0	0.00935562	0.197222
284	0	0.487771	0.653689	0.0393637	0.233974	0	0.0228184	0.143093	0.0668808	0.0579381	0.000134207	0
285	0.291101	0.34091	0.472982	0	0.229937	0.219742	0.018483	0.164215	0.0935989	0.24465	0.0112574	0.0854916
286	0.509721	0.22961	0	0	0	0.127082	0	0.205975	0.151675	0.108447	0.243813	0
287	0.171596	0	0.0358775	0.0463172	0.136267	0.375221	0.00402362	0.000880508	0.137448	0.12309	0.18857	0
288	0.0719652	0.267915	0.18582	0.147052	0.236181	0	0.0421519	0	0.221982	0.0594467	0	0.133941
289	0.271604	0	0.206129	0.0591967	0.433901	0.11147	0.0387045	0	0.232888	0	0.342369	0
290	0.544538	0.298454	0	0	0	0.253825	0.0357237	0.198294	0.154686	0	0.308162	0
291	0.16095	0.2139	0.827024	0.157666	0.251719	0	0	0	0.208599	0.0907883	0.00804915	0.0671205
292	0.534	0.0737657	0	0	0.526731	0.174937	0.101674	0.252095	0.313115	0	0.317379	0.121883
293	0.528873	0.506831	0.142796	0.0199807	0.0980313	0.255332	0.0943329	0	0.265246	0.00802656	0.148319	0.0693072
294	0.529344	0	0.0524672	0.0497467	0	0.257477	0.0501038	0	0.114877	0.157756	0	0.0831413
295	0.252685	0	0.159077	0.0924853	0.182492	0.129167	0.175498	0	0	0.0675176	0	0
296	0.360564	0.427659	0.0380891	0.00577542	0.255804	0.185384	0.00332766	0.0813354	0.0517765	0.0322948	0.332652	0.160173
297	0.176283	0.0771481	0.413435	0	0.328136	0.131369	0	0.172033	0.204044	0	0.298414	0.198057
298	0.249932	0.461289	0.368623	0	0.197445	0.0889063	0.150658	0	0.284193	0.0328975	0.0312366	0.0466229
299	0	0.407281	0.188989	0	0.175296	0	0.132449	0	0.119449	0.0221875	0.0173232	0.17636
300	0.275274	0.186454	0	0.113962	0.394692	0.0989849	0.033015	0.000345794	0.205062	0	0.0475594	0.0518614
301	0.362369	0	0.0299171	0.189858	0.0166053	0.00379057	0.0166707	0.104872	0.00539681	0	0.0369306	0.238885
302	0.0966084	0	0.0517326	0.0731333	0.294223	0.0797129	0.0170113	0	0.115594	0.0213072	0.0221966	0
303	0.607182	0	0.000371968	0.0266013	0.383382	0.178969	0.00547308	0.198013	0.118966	0	0.357254	0
304	0.578343	0.354883	0.195092	0.0879763	0	0.138106	0.190747	0.249637	0	0	0.0213136	0.16762
305	0.225175	0.522573	0.122319	0.110322	0.18526	0.236498	0.0206743	0	0.166289	0.110409	0	0.0347542
306	0.303256	0.664579	0.241444	0	0.22822	0	0.120447	0.103001	0.230127	0	0.0340063	0
307	0.0516828	0.230986	0.203813	0	0.167058	0.069792	0.0606521	0.00115788	0.341479	0	0.0360077	0.217551
308	0	0	0.549578	0.263449	0	0.00044563	0	0	0.193296	0	0	0
309	0.936333	0	0	0	0.201255	0.228793	0.0362904	0.245992	0	0.0545785	0.317741	0.20131
310	0.240984	0	0.0536438	0.0497831	0.341541	0.32556	0.0937923	0.0808396	0.293936	0.0234366	0.0669594	0
311	0.321395	0.52584	0.135156	0	0.237277	0.122565	0.086461	0.000296209	0.171091	0.0198647	0.15989	0
312	0.30387	0	0.0380292	0.0457805	0.468984	0.188237	0	0	0.147267	0.0397069	0.0638433	0.115667
313	0.61507	0	0.363348	0	0	0.00507995	0.0226886	0.00258507	0	0.0081192	0.0353704	0
314	0.490697	0	0.487502	0.214318	0.292042	0	0	0.000410885	0.107728	0.0195222	0.00955646	0
315	0	0.291168	0	0	0	0.174035	0.192882	0	0.135127	0.028683	0.0326241	0
316	0.565993	0.384375	0	0.0076459	0.440519	0.227331	0.00655572	0.208281	0.130172	0	0.400698	0.151564
317	0.421047	0.239845	0	0	0.465934	0	0	0	0	0	0.363411	0
318	0	0	0.00358636	0.133146	0.323471	0.000906019	0.0590792	0	0.0774807	0	0.0323749	0.0445826
319	0.542455	0	0	0.0756735	0.151793	0.270301	0	0	0.128767	0.0366253	0.348679	0.144649
320	0.324849	0.19463	0	0.0839294	0.230189	0.224983	0.0971609	0.139895	0.178152	0.0224633	0.133506	0.0531112
321	0.201506	0	0.158497	0.100528	0.222608	0.203706	0.0137853	0	0.136706	0	0.370518	0
322	0	0.0618309	0	0.117759	0.469774	0.231468	0.105562	0	0.184906	0.00359907	0.0733718	0
323	0	0	0.0188249	0.0993478	0.0229428	0	0.0156859	0	0.0149477	0.0201033	0.0474415	0.000142393
324	0.668822	0.282997	0.0328711	0	0.289437	0.274056	0	0.197673	0	0	0.355607	0.22438
325	0.492024	0.224153	0	0.0910012	0.191369	0.127953	0.0970216	0	0	0.00794652	0	0.163569
326	0.179373	0.459871	0.208938	0.113264	0.245633	0.0879401	0.0044599	0	0.213426	0.0233395	0	0.122766
327	0.14851	0.00464744	0.0933028	0.0683209	0.07364	0.18101	0.0730569	0	0.29365	0.0242026	0.0228125	0.0749219
328	0.663902	0	0.200055	0.0501002	0	0.0879926	0.100857	0.0980245	0.0696006	0.0258928	0.0418373	0.0652379
329	0.417201	0.45688	0	0	0	0.223533	0.019976	0	0.09556	0.13654	0	0
330	0.188764	0	0.0708737	0.0866468	0.0284746	0.102222	0	0	0.180792	0.0261114	0.0612246	0.049954
331	0.170785	0.126135	0.00086019	0.0192789	0.122654	0	0.0107606	0.17047	0.0693017	0.00357588	0.0240487	0.0626898
332	1.01741	0.265972	0.196557	0.00216515	0.201218	0	0.10083	0	0	0	0.0929375	0
333	0.385315	0.604932	0	0.0372534	0.154409	0	0.169469	0.000169047	0.180779	0.0289785	0.0433243	0.226825
334	0.251823	0.720534	1.07287	0.0235813	0.330331	0.267911	0.000779131	0.194928	0	0.266349	0	0
335	0.366887	0	0.0985887	0.198353	0.234302	0	0.0465977	0	0.0827547	0.088188	0	0.101646
336	0	0.0847192	0	0.0772164	0.228164	0.135494	0	0	0.066073	0.0444351	0.0599321	0
337	0.346858	0.976751	0.339018	0.00621284	0.216722	0.178952	0.0474634	0.121765	0.189001	0.207894	0	0.0693396
338	0.50195	0.303485	0	0	0	0.203388	0	0.189637	0.16782	0.0555691	0.1754	0
339	0.259349	0.982195	0.619171	0	0.286317	0.172779	0.000628118	0.0822095	0	0.31582	0	0.0103987
340	0.404748	0.498571	0.0206832	0.0895638	0.270971	0.13603	0.0238929	0	0	0.0352117	0	0
341	0.237656	0	0.110147	0.0580913	0.00698628	0	0.0322068	0.265229	0.277667	0.0985162	0.495562	0.0717209
342	0.267583	0	0.0507251	0.109292	0	0.106409	0.16478	0	0.257983	0	0	0.124525
343	0.644496	0.198871	0.240716	0.0258573	0.406124	0.281786	0.0272906	0.146809	0.172239	0.00280754	0.304063	0.140205
344	0.23673	0.340758	0.0945713	0.0293786	0	0.120433	0.0306442	0.000599328	0	0.0741502	0.0550438	0.0610689
345	0.925187	0.137223	0.205643	0	0	0.000334031	0.138619	0	0.188816	0	0.0379242	0.251287
346	0	0.333045	0.235603	0.0479182	0	0.135099	0.0461492	0	0.161709	0.0685709	0	0.0745746
347	0.421995	0.709937	0.71155	0.00203881	0	0.108827	0.0523577	0.224802	0.289182	0.238711	0	0.0890599
348	0.273155	0.581742	0.00930151	0.0182042	0.109234	0.341388	0.0440982	0.0946822	0.521182	0.294172	0	0.147259
349	0.303578	0.569015	0.230902	0.0548202	0	0	0.0874733	0	0.189104	0.0148429	0.0322196	0
350	0.255551	0.119985	0.269975	0.0672581	0.353269	0	0	0	0.0632603	0.0282018	0.255638	0.145405
351	0.567864	0.478327	0	0	0.252682	0.135467	0	0.238966	0.228135	0.0499023	0.484341	0
352	0	0	0	0	0	0.477376	0	0	0.408437	0.00626035	0.161131	0.167013
353	0	0.225554	0	0.301603	0.408984	0.191034	0	0	0.0961616	0	0.0334239	0.095338
354	0.701274	0.0813861	0.0643737	0.0305662	0.0149347	0.21429	0.0358108	0	0.181818	0	0.504842	0.252341
355	0.18982	0.393448	0.438669	0.0409775	0.173564	0.090198	0.00333169	0.237983	0.016824	0.252799	0.0610567	0
356	0.319182	0.0196846	0	0.0630511	0	0	0.0517307	0	0	0.0435974	0	0.000850569
357	0.448815	0.188843	0.0631852	0.0534352	0.219253	0.0913276	0.076195	0	0.138696	0.00922955	0	0.0011117
358	0.299886	0.33277	0.231916	0.201159	0.335255	0.0615147	0.04134	0	0	0.00718185	0.0376365	0
359	0.282346	0.202936	0	0	0.406674	0	0	0	0.284286	0.0677946	0.267437	0.150506
360	0.140081	0	0	0	0	0.000214476	0.0108981	0	0	0.00776462	0.0316852	0.000160721
361	0.234588	0	0.0442333	0.137147	0.399259	0.184098	0.028605	0.141431	0.0989522	0.0465518	0.0220126	0
362	0.409273	0.108488	0.173286	0.0269199	0.399019	0.000909386	0.019425	0	0.248997	0.0511115	0.048782	0.110363
363	0.236376	0.101985	0.263661	0.157149	0	0.154374	0	0	0.0646909	0.23767	0.0690751	0.0616062
364	0.526377	0.250408	0.0345028	0	0	0	0.0670235	0	0.253324	0.0390536	0.578828	0.095425
365	0.652017	0.26914	0.036009	0	0.327582	0.100465	0	0.255999	0.16676	0.0637195	0.439625	0.138855
366	0.275273	0	0.234277	0.0659095	0.379813	0.174886	0.00597337	0	0	0.0334292	0.0140271	0.0695638
367	0.161795	0.147789	0.0381097	0.0367091	0.0214107	0.098616	0.168381	0	0.175072	0.00775881	0.0201733	0.149517
368	0.575848	0.327065	0.26249	0.0576053	0	0.00458578	0.0555467	0	0	0.00504368	0.157367	0.147613
369	0	0.274569	0.0298707	0.0438456	0.317606	0	0.00190505	0	0.25752	0	0.02365	0.0760008
370	0.564227	0.244189	0.113362	0	0.432125	0.148634	0.131562	0.0931413	0.301245	0	0	0.066204
371	0.045629	0.0385049	0	0.0238991	0.0137335	0.0241169	0.0073268	0	0.0585293	0	0.0628427	0.0227686
372	0.253354	0.354063	0.0134122	0	0	0.196294	0	0.139525	0.278787	0	0.303988	0.213504
373	0.397654	0.223329	0.15442	0.156214	0	0.197088	0.103518	0.173477	0	0	0	0.206369
374	0.51297	0.227954	0	0.0547751	0.269913	0	0.0953503	0	0.219562	0.0150897	0.0555656	0
375	0.27738	0.476034	0	0.0270565	0.0966401	0.0846754	0.0624998	0	0.115541	0.0116399	0.0255235	0.104422
376	0.235431	0.332177	0.296033	0	0.662558	0.0982977	0	0.116114	0.258127	0	0.37039	0.0377257
377	0.361462	0.130142	0	0.066989	0.425392	0.00326203	0.0283799	0.115559	0.149105	0.0191169	0.00826516	0.0734378
378	0.652384	0.431994	0.0189525	0.0756509	0	0.000791291	0.0765323	0.116549	0	0.0163257	0.156045	0
379	0.236722	0	0.642575	0.0663472	0.441016	0.219965	0.0280432	0.104621	0.0517279	0.0360292	0.236543	0
380	0.00852305	0.285581	0.104261	0.0722216	0	0.124766	0.0196769	0.0887209	0.426432	0.041641	0	0
381	0.312373	0	0.0798654	0.192524	0.433049	0	0.0704243	0	0.0527588	0.0359864	0	0
382	0.509934	0.390806	0.0305937	0	0	0.182675	0.0552913	0.371409	0	0.0442373	0.473256	0.174395
383	0.237044	0	0.238675	0.380405	0	0.15268	0	0	0.135373	0	0.103746	0.067294
384	0	0	0	0	0	0.000349346	0.0200903	0.00113578	0	0.0188906	0.33792	0.161653
385	0.292818	0.490404	0.289497	0.0187559	0.314387	0.122118	0.189774	0.134211	0.253947	0	0	0.127658
386	0.480106	0.530533	0.30589	0.0437151	0	0.152946	0.149889	0	0.267209	0.109257	0.0350082	0.148527
387	0.283971	0.645788	0.329865	0.0784213	0	0.282082	0.108972	0.140803	0.224648	0.0454068	0	0.121544
388	0.263772	0.195053	0.0678525	0	0.267565	0.1132	0	0	0	0.0300304	0.184422	0.122816
389	0	0	0.167914	0	0.603711	0.0037147	0	0.00273529	0.298335	0.0155254	0.0337497	0
390	0.110358	0.606563	0.331706	0.0757553	0	0.119615	0	0	0.106598	0.155073	0	0.119984
391	0.227293	0.795889	0.613392	0.0887749	0.278357	3.92976e-05	0.11725	0.000721152	0.18654	0.0304964	0.00944055	0
392	0.291886	0.0283384	0	0.224422	0.0429383	3.56577e-05	0.202226	0	0.235728	0	0.0230817	0.129171
393	0.0901788	0.384789	0.541376	0.0437238	0	0.236155	0.000836589	0.166096	0.130059	0.18744	0.0269775	0.0132722
394	0.344665	0.255884	0.468489	0.0133893	0	0	0.0264056	0	0.280065	0.0382365	0	0.0539833
395	0.316905	0	0.047183	0.335248	0.0719173	0	0.0438063	0	0.347434	0	0.116281	0.0729119
396	0.135282	0.349152	0.303403	0	0.261993	0	0.00636483	0	0.28523	0	0.302774	0
397	0.145285	0.0971149	0.137363	0.111853	0.231428	0.170907	0.0421903	0	0.192004	0.0136976	0	0.0582188
398	0.250379	0.463585	0	0	0.00546309	0	0	0.00619317	0	0	0.246724	0
399	0.150169	0.881147	0.707635	0	0	0.231368	0	0	0.148489	0.137738	0	0
400	0.0393008	0.0315998	0.0199747	0.0272845	0.154107	0	0.000265819	0	0	0.00648214	0	0
401	0.279289	0.226173	0.252311	0.119227	0.264304	0.10118	0	0.186977	0.0160388	0	0.387226	0.191861
402	0.544247	0.510997	0.0326288	0.054081	0	0.267363	0	0.205519	0.254147	0.247595	0.035486	0.173862
403	0.40248	0	0.175261	0.0288583	0	0.25633	0.02166	0	0.204359	0.26213	0.0102811	0.0360911
404	0.0546895	0	0.420077	0.0259495	0.128732	0.157322	0	0.193666	0.134194	0.0566209	0.28478	0.0418716
405	0.141177	0.317264	0.202817	0.0918849	0.0082025	0.000311027	0.0297347	0	0.26904	0	0.0776832	0.0695876
406	0.358201	0.42297	0.044633	0	0.199941	0.162502	0.0581616	0.000303549	0.376637	0.00705401	0	0.112093
407	0	0.216557	0.337909	0.0147598	0.125054	0	0.0518287	0	0.112157	0.0141959	0.0538391	0
408	0.431494	0.116525	0.649676	0.0134868	0.375585	0.235995	0	0.212695	0.27738	0.0203552	0.223189	0
409	0.294097	0.165087	0.155973	0.00564553	0.158575	0.0798335	0.236116	0.0929719	0.193601	0.0298267	0.0348372	0.0882597
410	0.337725	0.269268	0.391197	0.0169818	0.19531	0.0682495	0.00325636	0.000547411	0.0932907	0.0179108	0.180062	0.0372616
411	0.432845	0	0.39662	0.0278591	0.146788	0	0.0432905	0.000197763	0.20567	0.230274	0	0.0693304
412	0.2458	0.433352	0.339993	0.0248959	0.119161	0.188951	0.073631	0.129864	0.139568	0	0	0.0644234
413	0.280446	0.339651	0.214776	0.0655284	0.098068	0	0.000779357	0	0.175543	0.0302942	0.00556148	0
414	0.0793954	0.101428	0.0505738	0.0261087	0.245936	0	0.000881099	0.192474	0	0.0415105	0.15135	0.0492314
415	0.107304	0.7316	0.189773	0.0570726	0	0.106807	0.0473606	0.0019545	0.0937318	0.0697671	0.0710738	0.157621
416	0.206278	0.251028	0.188211	0.012973	0.202487	0.26332	0.0258928	0.225568	0.079286	0.260927	0	0.0837596
417	0.305398	0	0.101125	0.0858622	0.413791	0	0	0	0.156437	0	0.0932903	0.124837
418	0.135207	0	0	0.191084	0.365161	0	0.0596006	0	0	0.00514582	0	0.0677603
419	0.416609	0.212364	0	0.00589136	0	0.233276	0.0159908	0.244294	0.179993	0.122268	0.323703	0.214301
420	0.154126	0.498413	0.234189	0.04594	0.161308	0	0.175632	0.294778	0.243207	0	0.0095283	0
421	0.17975	0.380171	0.699647	0.0399929	0	0.341539	0	0	0.332034	0.0891367	0.000921618	0.159566
422	0.758735	0.503537	0.0367721	0.0458426	0.00947036	0	0	0.22698	0	0.058068	0.367318	0.0543388
423	0.995531	0.0628452	0	0	0.421409	0.221619	0	0.144889	0.262712	0.0845053	0.380163	0.215119
424	0.364666	0.133832	0.0456158	0	0.217247	0.223789	0.00201687	0.405867	0.272302	0.0591649	0.616968	0.128069
425	0.332627	0.549122	0.394586	0.0338406	0	0	0.00469484	0.124064	0.0788186	0.0936734	0	0.069294
426	0	0.00845988	0	0	0.810982	0	0	0.0059899	0	0.0409583	0.138189	0
427	0.607778	0	0.10821	0.0260768	0	0.00100163	0	0	0	0	0.163819	0
428	0	0.276621	0.406263	0.00896796	0	0.345329	0	0.15426	0.0798525	0.110569	0.102481	0.0960884
429	0.154939	0	0.221636	0.0412328	0	0.0939576	0.0667196	0.000660543	0.073433	0.00798332	0	0.10783
430	0.875319	0	0	0	0	0	0.0926716	0.000478222	0	0.0176638	0.0555867	0
431	0.84776	0.0937476	0	0.0792316	0.290902	0.256629	0	0	0.171921	0.0728327	0.40595	0.10069
432	0.192905	0.549728	0.00545254	0.0420817	0.00417352	0	0.247574	0	0.151647	0.00080923	0.0648036	0.179947
433	0.404562	0	0	0.0671008	0	0.107857	0.0625998	0	0.283923	0.0625196	0.0169018	0.113929
434	0.344013	0	0.188981	0.039818	0.453045	0	0.0107361	0.168341	0.197092	0	0.315601	0.180021
435	0.260492	0.0906794	0.11148	0	0.139307	0	0	0.2306	0.135064	0.0629214	0.486343	0.0405663
436	0.149647	0.206934	0.128216	0.250608	0.254141	0.108371	0.0132473	0	0.0638064	0.0912534	0.108995	0.0926119
437	0	0	0	0	0.0172975	0.488676	0.0155309	0	0.00243521	0	0.105322	0
438	0.211742	0.342999	0.238637	0.0662399	0.151498	0.0786331	0.00198584	0.0946958	0.277238	0	0.338158	0.0956527
439	0.356062	0.42117	0.100376	0	0.182353	0.179442	0	0.000667955	0.109502	0.393487	0	0.0694714
440	0.331376	0.0102734	0.16701	0.180764	0.117579	0	0.0317869	0.105108	0.0738122	0.000761073	0	0.0927318
441	0.413883	0.303421	0.367994	0.0484443	0.285772	0.150935	0	0.170134	0.204925	0.0279925	0.380028	0.143704
442	0.432945	0.216066	0.562547	0.0661734	0.102569	0	0.01995	0.00128336	0.096905	0.0709863	0.0393741	0.0743752
443	0.256698	0.272334	0.144628	0.13279	0	0.227331	0.0126755	0	0	0.0295237	0.00339189	0.0864761
444	0.363612	0.0307264	0.173842	0.133211	0.030221	0.148531	0.124746	0.095905	0.104425	0.0256635	0.0747167	0.0551511
445	0.608727	0.21906	0	0.0725904	0.219222	0.137026	0.0978749	0	0.137938	0.0455698	0.0486304	0.0988693
446	0.0490944	0	0.112742	0.37494	0	0.122176	0	0.000377532	0	0.0562208	0.0288771	0
447	0.286292	0.451145	0.00775297	0.0500088	0.48392	0	0.00969846	0.000714898	0	0.0346496	0.0897617	0
448	0.220066	0.220255	0	0.0140969	0.367861	0.220518	0.0407657	0.171921	0.329319	0	0.368389	0.114703
449	0.434169	0.320356	0.312798	0.0848062	0.123686	0	0.157042	0.105552	0.0753719	0.0293544	0	0.149449
450	0.178015	0.286622	0.423995	0.00722715	0.195857	0.262835	0	0.202141	0.0425687	0.0812835	0.106644	0.113784
451	0.184771	0.298769	0.0205435	0.0480326	0.274515	0	0.0432437	0.104051	0.279856	0	0.441552	0.118208
452	0.114124	0.311844	0	0.0557692	0.194731	0.125641	0	0.268302	0.234227	0.104642	0.291676	0.216206
453	0	0.184471	0	0.153245	0.0327927	0.115466	0.0329744	0.000191003	0.115735	0.00478836	0.0384531	0.0618397
454	0.317353	0.295098	0.340042	0.075169	0.243366	0	0	0.15191	0.0971235	0.0376128	0.273264	0.0514141
455	0.438174	0.0420373	0.0902209	0	0.497991	0.191838	0	0.121043	0.109046	0.0667839	0.485	0.145519
456	0	0	0.536957	0.236796	0.118593	0	0	0	0	0	0	0
457	0.091869	0.0870084	0.0245458	0.268696	0	0.0987756	0.0657028	0	0.184412	0	0.0772214	0
458	0.399653	0.356634	0	0	0	0.0956865	0.111068	0.10426	0.158921	0.0765011	0.0609295	0.0567211
459	0	0.496174	0.0824796	0.248951	0	0.00124282	0	0	0.0415246	0.0133103	0	0.0416521
460	0.136094	0.241815	0.0236336	0.0140044	0	0	0.174528	0.0562355	0.172813	0	0	0
461	0.563503	0	0	0	0	0.27643	0.0928424	0.181645	0.189749	0.0512052	0.437896	0
462	0.264375	0.21728	0.0446191	0.064324	0	0.109793	0	0	0.11342	0.00349635	0.26255	0.062014
463	0.223949	0.317412	0.600984	0.033425	0.285296	0.176281	0.010068	0.00113696	0.37341	0.0520813	0	0
464	0.428461	0.441366	0	0.0505528	0	0.0927182	0.0462873	0.176754	0.155453	0.0741011	0.094986	0.0429784
465	0.661747	0.562753	0.155672	0.00547412	0.16492	0.0856219	0.170289	0	0.400655	0	0.0192442	0.0650854
466	0.271398	0.484942	0.232501	0	0	0.0774792	0	0.0818759	0.119978	0.159349	0.0509391	0.120118
467	0.122368	0.10905	0.034754	0.0625207	0.213085	0.102506	0.0595764	0	0.195195	0.00795848	0.0547816	0.0553287
468	0.912506	0	0	0.0737559	0	0.000889413	0.0876149	0.111586	0.206829	0	0.0972765	0.274828
469	0.13624	0.230732	0.0259984	0.00432182	0	0	0.143031	0.118875	0.301566	0.023554	0.0902798	0.0804478
470	0.789249	0.147942	0.642247	0.265817	0.441459	0.161017	0	0	0	0	0.0751809	0
471	0.246875	0	0	0.00868769	0	0.32752	0.041906	0	0.112522	0.0876157	0.339405	0.117834
472	0.511273	0.396172	0.314663	0.0183002	0.247833	0.13017	0.000648901	0	0.125771	0.132483	0.0154188	0.0616694
473	0.699421	0.312338	0.0504118	0.0162347	0.297802	0.240522	0.0953492	0	0.21143	0	0.0252279	0.169744
474	0.292519	0	0.00742042	0.0428654	0	0	0	0.000918515	0.152186	0	0.209474	0
475	0.758115	0.687821	0.258926	0	0.106179	0	0.0177433	0	0.273345	0	0.0921983	0.141274
476	0.53541	0.720329	0.203545	0.0159721	0.0981161	0.139238	0.0729479	0.10689	0.213086	0.0056076	0.0273554	0.0697326
477	0.563425	0	0.0953612	0.0145323	0	0.143244	0	0.249885	0.170393	0.0588883	0.276725	0.190838
478	0.423503	0.401607	0	0.0230209	0.230155	0.201416	0	0	0.271477	0.0382124	0.405055	0.168963
479	0.0528932	0.544773	0.323287	0.108828	0.0783606	0	0.0441779	0	0.215692	0.115865	0.00769149	0
480	0.350679	0.370836	0.681569	0.036361	0	0.129506	0	0.156592	0.260399	0.00710149	0.281912	0.0675365
481	0.0910928	0.377949	0.384156	0.0331894	0.0812281	0.111477	0.0966416	0	0.104305	0	0	0.140923
482	0.318072	0.495924	0.0282917	0.034858	0.261011	0.106298	0.0594398	0	0.220836	0.0304104	0.00149741	0.144386
483	0.55925	0.261196	0.0135811	0.0189729	0	0.210703	0.153078	0	0.210836	0.0790388	0.110585	0.197463
484	0.184885	0.801842	0.667503	0.0299876	0	0.13351	0.0525558	0	0	0.00775816	0	0.000492661
485	0.291804	0	0.0758865	0.021821	0.00435282	0.00126244	0	0	0	0.0303732	0.156998	0.0864502
486	0.0618965	0.155514	0.0900427	0.0829474	0.0301947	0.146184	0.0572056	0	0.11294	0.0405004	0.0633831	0
487	0.163949	0.33358	0.176433	0.143448	0.248922	0	0.0600346	0	0	0.00863191	0.0262061	0.106359
488	0.4206	0.0238684	0.0488697	0.0879729	0.113524	0.0836297	0.0281952	0	0.350214	0.00786661	0	0.109648
489	0.264663	0.281543	0.130508	0.0403205	0.120789	0	0.0210839	0.00146376	0.322099	0.00669366	0.00753058	0.0859766
490	0.347199	0	0.0691314	0	0	0.263024	0.0742308	0.310133	0.0242763	0.0678499	0.455848	0
491	0.188062	0	0.324272	0.261351	0.402498	0.198883	0	0	0.0145376	0.0147392	0.291893	0.0783744
492	0	0.242065	0.289945	0.0628846	0.471267	0	0.0596264	0.159412	0	0.0625494	0.0310189	0
493	0.559497	0.185459	0.011922	0.0515278	0.702178	0.203761	0.0446711	0	0.561527	0	0.321884	0.07203
494	0.479593	0.476431	0.153801	0.00532858	0	0	0.165984	0	0.401222	0.014253	0.0398209	0.127727
495	0	0.392537	0.109799	0	0	0	0	0	0	0	0.159959	0.0895597
496	0.549489	0	0.0366055	0	0	0.406506	0.0225208	0	0	0.010702	0.198977	0
497	0.565406	0.630496	0.181655	0	0.420665	0.0819741	0	0.263945	0.11065	0.0261026	0.316007	0.131606
498	0.18063	0.231925	0.0488939	0	0.382797	0.453664	0.145539	0	0.265053	0	0.239793	0.102955
499	0.100012	0.11624	0.448732	0.0907846	0.559152	0	0	0	0.173961	0.0719661	0.0461498	0.101561
500	0.161244	0.145131	0.125265	0.165498	0.29012	0.0921262	0.0298643	0	0	0.0360599	0	0
501	0.413337	0.253307	0	0.0263272	0.278348	0	0.0187383	0.264251	0.262134	0	0.359207	0.0543977
502	0.801804	0.204932	0.071812	0.0863255	0	0.0977488	0.104493	0	0.20443	0.103633	0	0.213676
503	0.203655	0.395304	0.0897837	0.0967612	0	0.177623	0	0	0.303322	0.007514	0	0.155919
504	0.566674	0.246692	0.0858868	0.0180892	0.246242	0	0.13002	0.0922556	0.170833	0.0554385	0.0552315	0.0731797
505	0.283511	0.320467	0.379119	0.0455167	0.16024	2.38085e-06	0.0824417	0	0.0915422	0.0505177	0.0573958	0.146084
506	0.511247	0	0	0	0	0	0	0	0	0	0.0622651	0.251077
507	0.160785	0.0671845	0.0170609	0.0919974	0.171579	0.151589	0	0.001187	0.243321	0	0.251049	0.194355
508	0.212736	0.27106	0	0.0578138	0	0.233686	0.149152	0	0.276887	0.0393317	0.00259764	0.240802
509	0.159655	0.113404	0.133609	0.0798255	0.0597399	0.0638827	0.0328589	0	0.131973	0	0.0262187	0
510	0.290632	0.20518	0.0863469	0.00490827	0	0.000837417	0.0811724	0	0.134178	0.0154383	0.0305092	0.0803951
511	0.527123	0.140066	0.145076	0.0255906	0.173687	0.167485	0	0	0.0819323	0	0.325418	0.150323
512	0.431915	0.268213	0.086354	0.0265921	0.327549	0.252193	0.0281668	0.151139	0.217896	0	0.410462	0.218567
513	0.171634	0.125993	0.168447	0.0426033	0	0.190316	0.0461201	0.119478	0.265436	0	0.199278	0.0872449
514	0	0	0.53137	0.0568744	0	0	0.0209068	0.420884	0	0.0858821	0	0.139338
515	0	0.219086	0.0752401	0.00461089	0.30689	0.188346	0.0373413	0	0.200027	0.0515423	0.000523443	0.081788
516	0.280057	0	0.421748	0.0932426	0.295772	0	0.0847507	0	0.0967403	0.0107869	0.212152	0.0948569
517	0.576381	0.440354	0	0	0	0.0988593	0.0987901	0	0.389763	0.011844	0.0166549	0.0868635
518	0.339947	0.264725	0.205684	0.159038	0.485451	0.0903452	0.0680241	0	0.124529	0.0690722	0	0.0485984
519	0.134213	0.790633	0.189882	0.036892	0	0	0.0563557	0	0.104811	0.039055	0	0.0742652
520	0.417574	0.313538	0.406565	0	0.121827	0.25164	0.0118955	0.126217	0.00316156	0.150306	0.0445694	0.0742087
521	0.1924	0.120474	0	0.0615235	0.000291035	0	0.196828	0	0.384191	0	0.054931	0
522	0.180962	0	0.0404226	0.0565233	0.0751482	0.000907823	0.0952549	0	0	0	0	0.0527796
523	0.3695	0.404598	0.371255	0	0	0.381483	0.0444632	0	0	0.143197	0	0
524	0.456284	0.338508	0.00880038	0.0624925	0	0.186792	0.112533	0.0750787	0.261379	0.0171908	0.00788567	0.174542
525	0.283413	0.482052	0.0923371	0.0202513	0.184356	0.181742	0.0559128	0	0.223029	0	0.0747459	0.0927953
526	0.133368	0	0.0367522	0.0681343	0.372618	0	0.0873181	0	0.278536	0	0.131949	0.109405
527	0.640236	0	0.283422	0	0	0.360612	0.130265	0	0.120527	0.0416743	0.117684	0.187221
528	0.191042	0.110154	0.260618	0.255702	0.467954	0.0964118	0	0	0	0.0151187	0	0
529	0.129169	0	0	0.0691394	0.23171	0	0.0602946	0	0.116779	0.00190622	0.0139557	0
530	0.611705	0.387337	0.17476	0.121073	0	0.00543905	0	0.160077	0	0	0.212259	0.155929
531	0	0.316776	0.251369	0.118697	0	0.118019	0.0804194	0.000362787	0.236968	0	0.0679523	0.126175
532	0.0363641	0.664408	0.140122	0.0685787	0.0800516	0.0892408	0.0702208	0	0.0184397	0.094062	0	0.0273175
533	0	0.22148	0.0154389	0.390187	0	0.108379	0.0118613	0.000679095	0.0863816	0.0244559	0.0330514	0.164413
534	0	0.401292	0	0	0	0.421981	0	0.000576917	0.194557	0.156855	0.0634796	0.130225
535	0.437714	0.278042	0.135342	0.0412832	0.00687662	0.00156304	0.153421	0	0.53735	0	0	0.280886
536	0	0	0.447311	0.125696	0.17434	0.144018	0	0.00166448	0	0.0698759	0.0706249	0
537	0.658981	0.881085	0.27171	0.0441375	0.0920161	0.265007	0.0958496	0.194859	0.242934	0.0972018	0	0.110135
538	0.188943	0.815014	1.015	0	0	0	0.0455947	0.189161	0	0.0625154	0.0238124	0.123436
539	0	0	0	0	0.519981	0.00548858	0.000831911	0	0	0.0252201	0.0256123	0
540	0.225888	0	0.407169	0.0314889	0.0846058	0.159822	0	0	0.247127	0	0.325741	0.124941
541	0.361011	0.556621	0.128415	0.0305079	0.106723	0.0762379	0.0876744	0	0.122615	0.0475328	0	0.156148
542	0.239922	0.497085	0.820785	0.0833315	0	0	0.00856015	0	0	0	0	0
543	0.410215	0.0611659	0.109988	0	0.531975	0.0631511	0	0	0.235026	0.0496992	0.366521	0.150209
544	0.412074	0.260712	0.0378617	0.0187071	0.420161	0.360724	0.00481338	0.110453	0.065757	0.0187396	0.0124684	0.0688489
545	0	0	0.051131	0.0122526	0	0.00700888	0	0.403246	0.179005	0	0.391922	0.103529
546	0.510054	0.29143	0.0328301	0.0351413	0	0	0.00644891	0	0.303596	0	0.230076	0
547	0.285599	0.544326	0	0	0.307449	0.100345	0.155147	0	0.224221	0.0192333	0.0446566	0.0811592
548	0.40487	0.29658	0.129998	0.105938	0.25687	0	0	0.000959296	0.0929147	0	0.158113	0.0561238
549	0.0978551	0	0.414002	0	0	0.00410567	0.124776	0.149944	0.0500719	0.0046885	0.314782	0.086148
550	0.630755	0.104121	0.167555	0	0.300855	0.24171	0	0	0.326726	0.0737555	0.395561	0
551	0.118714	0.111514	0.231116	0.309277	0.333183	0.0799285	0	0	0.116183	0	0.0135949	0.106918
552	0.120758	0.0519852	0.0745315	0.460981	0.495392	0.0834369	0	0	0.194482	0.0163257	0.00231988	0
553	0.141049	0	0.0232593	0.0719161	0	0.173638	0.144702	0	0.583902	0.0101821	0.0642396	0.058672
554	0.359054	0	0.0404138	0.0671765	0.219881	0	0.0802764	0.100313	0.21613	0.222771	0.00912941	0.159155
555	0.55093	0.229734	0.212958	0	0	0	0.105754	0	0.131327	0.0125621	0.0575843	0.167837
556	0.307804	0.179244	0.0639306	0.119289	0.603078	0.199811	0	0	0.248068	0.0252546	0.121537	0.0807353
557	0	0.427426	0.577112	0.040774	0	0.00236595	0.0123507	0.203334	0	0.0538081	0.19783	0
558	0.347158	0.0864729	0.112462	0.0378725	0.235614	0.152411	0	0.151091	0.192612	0.00185145	0.0739443	0.128714
559	0.265049	0	0.84549	0.0268834	0.0927216	0.27267	0.0653255	0.0867934	0.0882779	0.100179	0.00546149	0.025502
560	0.234351	0	0.137012	0	0.363754	0.0986019	0	0	0.185996	0.0568988	0.26806	0.0627377
561	0.124676	0.53337	0.143745	0	0	0.086004	0.204997	0	0.101431	0.0835417	0.0194589	0.119519
562	0.369407	0.119387	0.2382	0.013018	0	0.090471	0.0544448	0.104537	0.22663	0.0270243	0.093161	0.0699776
563	0.206468	0.224887	0.25404	0.0304856	0.239373	0.148376	0.0335625	0.150005	0.252617	0.0237565	0.21009	0.138327
564	0.0838108	0.455353	0.223146	0.0225926	0	0	0.0512149	0.252564	0.208971	0.00932484	0.0379157	0
565	0.250481	0.478127	0	0.026815	0.285583	0.216466	0	0.266588	0.123243	0.0754099	0.490068	0.0442532
566	0.501532	0	0.370454	0.012201	0	0.116585	0.0539155	0.133561	0.268978	0.0297192	0	0
567	0.339434	0	0.306753	0	0.0883936	0.158558	0.0374127	0.104823	0.111699	0.266587	0	0.0279445
568	0.305632	0.0432191	0.0119927	0.187756	0.0440337	0.00261129	0.0177406	0.103819	0.0988723	0.0614228	0.155623	0.0522266
569	0.453734	0.240642	0.0638057	0.0601449	0.463116	0.186025	0	0	0.0856281	0.0261714	0.0948341	0.181968
570	0.225418	0	0.0889575	0.0758655	0.159732	0.258459	0.196412	0	0.0991874	0.0138137	0.151244	0
571	0.388786	0.0660829	0.0689853	0	0	0.225302	0.00846204	0.131247	0.109429	0.0620784	0.375461	0.116331
572	0.233415	0	0.147265	0	0.12005	0	0.121949	0.0912583	0.311592	0.0242134	0.056946	0.203496
573	0	0.210444	0.197601	0.0459075	0	0	0.100949	0.351492	0	0	0.238595	0
574	0.479243	0.0982128	0.228698	0.0240238	0.271361	0.182595	0	0.0871526	0.0506347	0	0.380705	0.19663
575	0.272414	0.179065	0.219723	0.0052147	0	0	0.0560524	0	0.283857	0.0241461	0.0703784	0.119547
576	0.240628	0	0.345501	0.0249049	0.157524	0.263864	0.0157506	0.222067	0.095752	0.0484012	0.165051	0.123353
577	0.133749	0	0.0109464	0.0266359	0.391785	0.0789107	0.0186906	0.122105	0.0462971	0.011286	0.373132	0.0859465
578	0.216998	0.468783	0	0.000934552	0.307878	0	0.0102267	0	0.185865	0.064343	0	0.0668115
579	0.176206	0	0.448419	0	0.209025	0.261541	0.00699464	0.0959136	0.155465	0.254726	0.00359345	0.0678277
580	0	0.138559	0	0.0940823	0.555405	0	0.0240517	0	0.390308	0.0667888	0.033564	0.0657437
581	0.54733	0.122262	0.0539715	0.144964	0.00193478	0.173802	0.0391319	0	0.199006	0	0	0.108089
582	0.418913	0.413228	0	0	0.179424	0	0.107789	0	0.365514	0	0	0.192796
583	0	0.205464	0.090782	0.0319202	0.106138	0.107587	0.08653	0	0.339683	0.0561963	0.0440731	0.0887252
584	0.624146	0.311838	0.00953571	0	0.177262	0.166267	0	0.110722	0.263855	0	0.360627	0.11925
585	0.153028	0.280063	0.206419	0.0706113	0.103116	0.094991	0.0467178	0	0.294369	0	0	0.102938
586	0.213426	0.134164	0.0315544	0.00774642	0.288099	0	0.14462	0.000358817	0.269143	0.0143798	0	0.0872852
587	0.28915	0.369979	0.106067	0	0	0	0.0641957	0	0.276598	0	0	0
588	0.372069	0.428068	0.452833	0.0477417	0.431443	0	0.0826076	0.000130816	0	0.0167223	0.0316127	0.181427
589	0.08774	0.233071	0	0.149969	0.285359	0.142207	0.029525	0	0.128785	0.0122144	0.0635245	0
590	0.310289	0.31268	0	0.0300611	0.203253	0.135782	0.066185	0	0.393702	0	0.0815761	0
591	0.119817	0.266208	0.0622598	0	0.115367	0.000951723	0.142841	0.0963335	0.38373	0.0157336	0.000169918	0.0692812
592	0.269968	0.379341	0.165295	0.0570991	0.442593	0.000567906	0.00470863	0	0.0565736	0.0302281	0.0335794	0
593	0.1517	0	0.312393	0.175317	0	0.112982	0	0	0	0.0303375	0.0828972	0
594	0.557949	0.0395993	0.175292	0.0146781	0.343247	0.239984	0	0.117239	0.1894	0.00648359	0.401028	0.198133
595	0.323201	0	0.645624	0.192851	0.259499	0.176045	0.0765208	0	0	0	0.0145038	0
596	0.544321	0.146351	0.0165406	0.0394004	0.443629	0.199953	0.048099	0.222473	0.178318	0	0.312331	0.114691
597	0.471997	0.360908	0.216362	0	0.223164	0.393945	0.0126145	0	0.198792	0.0977187	0	0
598	0.109065	0.732409	0.279618	0.0554559	0	0	0.090206	0	0.165305	0.0147141	0	0.0570095
599	0.0754598	0.436164	0.0983968	0.0853866	0.229904	0.152985	0	0	0.27891	0.015584	0.401748	0.111396
600	0.45637	0.360072	0.266045	0.0267634	0.214172	0	0	0.361384	0.262505	0	0.401803	0.160243
601	0.354498	0.0477083	0.181379	0.00529317	0.28643	0.159099	0.0184538	0.161498	0.0346483	0.0308019	0.432533	0.135493
602	0.320935	0.153154	0.0374499	0.0763948	0	0	0.0225001	0.00130372	0.0986032	0.0338949	0.0860619	0.100285
603	0.521069	0.176757	0.0777846	0.00458688	0	0	0.138622	0	0.424824	0.012191	0	0.0736699
604	0.398054	0.263207	0.471262	0.0329535	0.0986071	0	0.106581	0.118046	0.321119	0.0176306	0	0
605	0	0	0	0	0	0.0146502	0.0111985	0	0	0	0.252057	0.235159
606	0.14886	0.337981	0.102688	0.0753565	0	0	0.0715185	0	0	0	0.0174875	0
607	0.694645	0	0.0245058	0.0237907	0.00599537	0.00493946	0.0263278	0	0	0.0202232	0.0532948	0
608	0.19794	0.198133	0.0277528	0.0432953	0	0.11203	0.100887	0	0.00905323	0.01374	0.114652	0.0738538
609	0.147898	0	0.717619	0.0221776	0.322405	0	0	0	0.100616	0.0642435	0.332356	0.157187
610	0.545736	0.366178	0	0	0.248146	0.235348	0.0651178	0.210288	0.172689	0.0429879	0.369878	0.0861654
611	0.0366066	0.38471	0.185418	0.116134	0.191217	0.133651	0.0617863	0	0.281308	0.0123102	0	0.0682368
612	0.119814	0.00786125	0.0288844	0.1347	0	0	0.0896578	0	0.107906	0	0	0.0408419
613	0.240237	0.496799	0.0168227	0	0.220118	0	0	0.23504	0.245859	0.266638	0.0198364	0
614	0.479139	0.460526	0.232199	0.0649913	0.00502993	0.102801	0.0315018	0.215239	0.0870108	0.01896	0.194126	0.0526182
615	0.268795	0	0.28171	0.0208899	0	0.0900554	0.0904004	0.107102	0.227617	0.0427627	0.102118	0.11961
616	0.141532	0.338083	0.0352728	0.0576655	0	5.36298e-05	0.0545597	0	0.222304	0.0447178	0	0.0839951
617	0.492605	0.0931174	0.016457	0.0552249	0.264908	0	0.0457501	0	0.436331	0.0578599	0.0925224	0.0819645
618	0.569927	0	0.494035	0	0	0.00395068	0.00127171	0.469221	0.126521	0.0827974	0	0
619	0.0272347	0.304763	0.285688	0	0	0.0750447	0.0966354	0.082982	0.214643	0.053623	0.067795	0.113952
620	0.136281	0.588704	0.579532	0.0707751	0.261065	0.170858	0.0443438	5.55481e-05	0	0.0310462	0	0
621	0.239443	0.440674	0.386447	0.0103554	0	0	0.0177721	0.334314	0.225566	0.1252	0.144721	0
622	0.335811	0.223267	0.277483	0.0295249	0	0	0.0722382	0.17854	0.133871	0.0377825	0.0939105	0.155432
623	0.489754	0.251293	0	0.106323	0.188579	0	0.0996394	0.000570234	0.218849	0.0523878	0	0
624	0.544518	0	0	0.0364296	0.297125	0.248856	0.0260551	0.130912	0.376257	0.0347799	0.310128	0.194625
625	0.386184	0.348594	0	0	0.714535	0.25	0	0.00101054	0	0.041706	0.233216	0.137659
626	0.392479	0.0221091	0.0301776	0	0.305244	0.148719	0	0.0829294	0.315382	0	0.62761	0.189457
627	0.642095	0.303261	0.0824558	0.0138807	0.261644	0.0878114	0.203276	0	0.192819	0.0151845	0.0651873	0.0615248
628	0.249667	0.370549	0.247683	0	0.191256	0	0.0109114	0.123174	0.226193	0.079942	0.166112	0.0644697
629	0.302516	0.553658	0.0558614	0	0.298964	0	0	0	0.194784	0.10729	0.0600473	0.129519
630	0.670816	0.0183373	0.134865	0.020151	0.456825	0	0.0929638	0.000690494	0.095359	0.01135	0.00451699	0.245
631	0.671694	0	0.270481	0	0	0	0.0267016	0.284616	0	0	0.206011	0.242782
632	0.393371	0.0721578	0.139982	0.0175876	0.371202	0.200894	0.0186888	0.129615	0.156234	0	0.187051	0.0969557
633	0.566942	0.220016	0	0.0316329	0.413075	0.100966	0	0.335052	0.227239	0.0219757	0.447468	0.145732
634	0	0	0.305381	0.113894	0.00704861	0.13409	0.00747602	0	0.191979	0.0108717	0.0714588	0.166241
635	0.440474	0.247334	0.0467108	0.109092	0.402277	0.00272297	0.0246228	0	0.102828	0.0307629	0.0944753	0.091818
636	0.349349	0	0.24808	0.107507	0.144431	0	0	0	0	0.0956453	0.0342648	0.202979
637	0.306227	0.420222	0.573666	0.0130606	0.12134	0.122452	0.0029874	0.236411	0.225457	0.210473	0	0.0990692
638	0.424721	0.30553	0.0359383	0.0209691	0.145855	0.156333	0	0.216948	0.147639	0.00157256	0.365247	0.144118
639	0.33552	0.235686	0.624289	0	0.240472	0.20232	0.0124486	0.228974	0.277866	0.0480032	0.282055	0
640	0.598383	0.776601	0.0253626	0.0944088	0.232273	0	0.141379	0	0	0.00656177	0.0476005	0.204985
641	0.385798	0.0667277	0.0337361	0.0136124	0.00350636	0.222541	0	0.277355	0.0531577	0.0692673	0.292209	0.171668
642	0.339965	0	0.474117	0.054083	0.301876	0.00169791	0	0	0.200581	0.00743536	0.0374054	0.0853337
643	0.231741	0.625739	0.0589997	0.0913707	0	0.000651902	0.0879745	0	0.0836848	0.0685913	0.0816082	0.16762
644	0	0.478428	0.218212	0.024518	0	0	0.00541971	0.00102214	0	0.0183633	0.0262933	0.0238219
645	0	0.26299	0.327545	0	0.00744341	0.0040419	0	0.00051548	0.198083	0.000723516	0.0998658	0.155626
646	0.285553	0.0583735	0.14247	0.227219	0	0.000671311	0.0469444	0	0.0927569	0.0164094	0.0613943	0
647	0.787428	0.417308	0.465123	0	0.0464266	0.205317	0	0.263968	0.294123	0.36901	0	0.0423513
648	0.496576	0.686331	0.295317	0.00580421	0.15888	0.301896	0	0.175199	0.223807	0.178978	0	0.0398027
649	0.303416	0.0285637	0.103363	0.138065	0.392353	0.0764488	0.15411	0	0.166385	0	0.0425287	0.0487132
650	0.677361	0	0	0.00706145	0	0.0036058	0.0777759	0	0.241617	0.0205305	0.583758	0.151795
651	0.210554	0.669604	0.511137	0.0524448	0.187183	0.0959488	0.0156592	0.112548	0.0217513	0.151519	0	0
652	0.28475	0	0.22756	0.109353	0.071219	0.28451	0.0230973	0	0.130657	0.0786247	0	0.0752875
653	0.197852	0.377165	0.0050346	0.0110504	0	0.150381	0.133391	0	0.233422	0.0339659	0.021942	0.10683
654	0.368665	0.712217	0.0531828	0.0456825	0	0.0881184	0.127668	0	0.234201	0	0.18016	0.11723
655	0.171657	0.169772	0	0.0299724	0	0	0.165233	0	0.346018	0.0362439	0	0.127686
656	0.538377	0	0.205748	0.0341419	0.144807	0.00219324	0.143531	0	0.113661	0.0183959	0.065531	0.0747884
657	0.103332	0.241309	0.115702	0.0160907	0.153824	0	0.0674069	0.116343	0.235802	0	0.105858	0.0710092
658	0.854751	0.823201	0.0260389	0.0101283	0.199839	0	0	0	0.287792	0.180243	0.0602791	0
659	0.612626	0.374885	0.147732	0.04293	0.511733	0.212618	0	0.229743	0.114775	0.0318176	0.454974	0.0939433
660	0.414764	0.389155	0.307549	0.0181908	0.24153	0.196518	0	0.241989	0.0835921	0.3201	0	0.190782
661	0.51655	0.13154	0.232066	0.0464935	0.298565	0.178258	0.0370089	0	0.162741	0	0.351257	0.0989037
662	0.509809	0.407257	0	0.0965075	0	0.181097	0.0391237	0	0	0.0638145	0	0.246514
663	0.775559	0.355127	0.395754	0	0.314267	0.0876384	0.0936112	0	0.450926	0.0436505	0.0125225	0.11991
664	0.423848	0.290117	0	0.0668754	0	0.279111	0.0594844	0	0.29983	0	0.399898	0.260877
665	0.197792	0.162016	0.167541	0.0341473	0.233782	0.148687	0.0170659	0	0.13762	0.0548417	0.0777952	0.0510828
666	0.211448	0.197634	0	0.0398497	0.63147	0	0.0200461	0	0.223284	0.025431	0	0.0570202
667	0.141477	0.145245	0.193861	0.199454	0.252028	0.0934967	0.0162363	0.111335	0	0	0	0.00118239
668	0.265856	0.179652	0.106306	0	0	0	0.138571	0.0904873	0.282831	0.0160112	0.0117081	0.0603719
669	0.383079	0	0.119027	0.0462731	0.124376	0.118833	0.0979969	0	0.341111	0.0581145	0.186636	0.175187
670	0.546393	0.228829	0.225843	0.0523433	0.225078	0.130799	0	0	0.168516	0.0348171	0.255536	0.0787616
671	0.183267	0.668065	0.361589	0.119958	0.223498	0	0.0220178	0.112924	0.0838935	0.117541	0.0103223	0.0590635
672	0.592611	0	0.40159	0.0678953	0	0	0	0	0.0828862	0.188007	0.133121	0.113339
673	0.404324	0.0119987	0.205788	0.108153	0	0.137869	0.0112917	0.135396	0.0101567	0	0.0650831	0.2177
674	0.368555	0.258823	0.00568146	0	0.579031	0.0722983	0.013564	0.167831	0.114805	0.0486896	0.393267	0.243532
675	0.527506	0.323311	0.0133539	0.0306095	0	0.136523	0.0548575	0.145904	0.151389	0.0482321	0.0186615	0.174693
676	0.478736	0.493108	0.43203	0.0586338	0.253894	0	0.0743118	0	0	0.0129911	0	0.0615964
677	0.304037	0.513866	0.365542	0.0738935	0.186751	0	0.0441777	0.162489	0.176198	0	0.0547702	0.162577
678	0	0	0.0725436	0.120315	0.341583	0	0	0	0.142808	0.0261428	0.0714553	0.058319
679	0.381211	0	0.320423	0.00439186	0.268481	0.125399	0.0679518	0.281778	0.170169	0.0176484	0.250777	0.155666
680	0	0.323175	0.574347	0.0597524	0.0633245	0	0.0264889	0.145528	0.211607	0.0121298	0	0.0890192
681	0.522706	0.0753829	0	0	0.292042	0.100114	0.01617	0.104285	0.155236	0.00785013	0.552993	0.226425
682	0.509637	0.37646	0.110154	0.0592248	0.123979	0	0.0207747	0	0.191014	0.0451914	0.0701744	0.179258
683	0.128159	0.431775	0.156804	0.0854286	0	0.000655504	0.060817	0	0.149266	0.0683762	0	0.0318999
684	0.0767568	0.142143	0	0.165688	0.160478	0.102089	0.0675882	0	0	0	0	0.0372759
685	0.586861	0.227129	0.0191608	0.0812254	0	0.177862	0.102939	0	0.162375	0.00355223	0	0.160684
686	0.200105	0.0465581	0.215148	0.0821086	0	0	0.0444995	0	0.0677809	0.0333494	0.0275984	0
687	0.822441	0.101197	0.0300903	0.0147139	0.184719	0.287417	0	0.260464	0.274586	0.0398727	0.48781	0.107663
688	0.272622	0.201298	0.034836	0.0106539	0.184567	0.071125	0	0.0708863	0.0848639	0	0.025111	0.0739339
689	0.185677	0.089719	0.123788	0.0707572	0.0311442	0.133053	0.0750638	0	0.508398	0.0319695	0.059149	0.160501
690	0.525565	0	0.431417	0	0.296405	0	0.0518071	0	0.159502	0.0766093	0.148426	0
691	0.243379	0.260368	0.00135955	0.146984	0	0.104436	0.074715	0	0.00700116	0.0397323	0.093793	0
692	0	0.260125	0.177796	0.16477	0	0.17638	0.00357457	0	0.0784887	0.0411943	0	0.0588666
693	0.163684	0	0.186318	0.0605378	0	0.261757	0.0231496	0.186738	0.216816	0.223014	0.0415285	0.0769974
694	0	0	0.205123	0.0641591	0.299486	0.00377504	0.00838718	0.125243	0.199116	0.0222945	0.0291629	0
695	0.344128	0.214839	0.170712	0	0.348277	0.0997713	0.0617198	0	0.0403689	0.277032	0.0655379	0.0718469
696	0.528926	0.000709293	0.127201	0.0518654	0.109309	0.163737	0.0472163	0.000248058	0.154877	0.021206	0.013357	0
697	0.553003	1.01483	0	0	0.124055	0	0.165739	0.241121	0.320751	0.00679375	0.046786	0.0856916
698	0.651715	0.618167	0.0873723	0.013754	0.0983484	0.141762	0.17766	0	0.218863	0.0354816	0	0.0827233
699	0.641559	0.222673	0.125628	0	0.00319754	0	0	0.130086	0.11935	0	0.701697	0.192905
700	0	0.212346	0.0504403	0.0505399	0.104507	0.162666	0.190451	0	0.19898	0	0.0389055	0
701	0.358241	0	0	0	0	0.166488	0	0.000226736	0.1851	0.0581305	0.413755	0
702	0.27084	0.180989	0	0.0169895	0	0.16162	0.0345372	0.0899567	0	0.0326944	0	0.131043
703	0.438764	0.293332	0	0.115265	0.0246097	0.00365024	0	0	0.238709	0.0558619	0.00805415	0.128123
704	0	0	0.0465718	0.0402291	0	0	0.167391	0.000154214	0.17524	0	0.0568849	0.0573086
705	0.223106	0.446002	0.916073	0	0.0681932	0.296209	0.0074137	0.109933	0.0282212	0.295896	0	0
706	0.158874	0.187363	0.224365	0.0339654	0.365335	0	0.0483456	0.000204031	0.101348	0.042082	0.069161	0.0679232
707	0.351472	0.229578	0.254477	0.0189456	0	0	0.048813	0.0962149	0.115435	0	0.108084	0.0850876
708	0.660555	0.254586	0	0	0	0.150276	0.0144206	0.178464	0.246478	0.119326	0.461187	0
709	0.373584	0.325466	0.323347	0	0	0.103371	0.0792316	0.000785304	0.47178	0	0.0312913	0.13946
710	0	0	0	0.0932658	0.398117	0.110259	0.0528075	0	0.371869	0.0283524	0	0.0533618
711	0.242905	0.412499	0	0.0730112	0.19342	0.114391	0	0.23324	0.101609	0	0.356265	0.124282
712	0.420269	0	0.271632	0.0343911	0	0.249557	0.0680614	0.241385	0.149267	0.139109	0.0501839	0.0416428
713	0	0.315704	0.0994712	0	0.528088	0	0.0306771	0	0	0	0.117216	0
714	0.3176	0	0	0.116653	0.302732	0.0864982	0.0680358	0	0.054887	0.059356	0.02332	0.0994987
715	0.250555	0.626696	0.691363	0	0.194056	0.272733	0.0494167	0	0.0776905	0.120741	0	0.0710966
716	0.361715	0	0.220563	0.032598	0.506195	0	0	0.290456	0.296009	0	0.510772	0.124164
717	0.212686	0.17069	0.152315	0.032492	0.137271	0.0897244	0.141457	0	0	0.0593328	0.0158677	0.10092
718	0.259418	0	0.198044	0.0634201	0	0.226753	0	0.339968	0	0.000575634	0.363058	0.290866
719	0.100402	0	0.216713	0.183992	0.139394	0	0.00457007	0	0.012293	0.00109588	0.0142327	0.0511234
720	0.259606	0	0.278028	0.05312	0	0.175371	0.0324356	0	0.319194	0.0548517	0.152967	0.0760716
721	0.277895	0.513677	0.515372	0.0439215	0	0	0.0599659	0	0	0	0.0304609	0.0893798
722	0	0	0.0114925	0.0455934	0	0	0	0	0.0152726	0	0.275371	0
723	0.371725	0.124334	0	0.0779037	0.313161	0	0.14691	0	0.123615	0.0152868	0.0383076	0
724	0.513577	0.372043	0.00619343	0.126065	0	0.157492	0.0768735	0	0.114209	0.0798305	0.0210219	0.160104
725	0.23958	0.653548	0.407669	0	0	0.372234	0.0270922	0	0.172852	0.200765	0	0.0684903
726	0.224095	0.19716	0.0851567	0.116201	0.303145	0.106372	0.0456516	0	0.307472	0	0.0452162	0.130333
727	0.00581178	0.219568	0.267596	0.225138	0.123513	0.120567	0.0151646	0.0672487	0.0349094	0	0	0.0288138
728	0.209651	0	0.0289898	0.0203769	0	0.420037	0.0542384	0	0	0.0600713	0.352148	0.131218
729	0.254046	0.0594022	0.0255282	0.0146644	0.136794	0.0644261	0	0.221754	0.180944	0.00877479	0.268254	0.159624
730	0.245862	0.139545	0	0.0115723	0.112181	0.165067	0.106979	0.0726959	0.233799	0.0587502	0.103633	0.155976
731	0.253545	0.188164	0.217572	0.0652846	0.00690882	0	0.0529935	0	0.294532	0	0.0628484	0
732	0	0.458284	0	0	0.000620032	0	0	0	0	0.0112069	0.00388445	0.112318
733	0.631536	0.749666	0.138858	0.00666085	0.28788	0.365082	0	0	0.135177	0.256887	0	0.178698
734	0.422318	0	0.264111	0	0.35963	0.313204	0.0154853	0	0.105824	0.1781	0	0.0929864
735	0.377095	0	0	0	0.792967	0.118462	0.0289263	0.305976	0.0523662	0.127915	0.385304	0.185386
736	0	0.277955	0.0339546	0.0709658	0.141606	0.104537	0.0146747	0.146453	0.108653	0.0298305	0.0765231	0
737	0.436736	0	0.336169	0	0	0.440448	0	6.92444e-06	0.185007	0.0222787	0	0
738	0.599073	0.12875	0.202227	0.0107938	0.166901	0	0.0748157	0.155383	0.257518	0	0.374774	0
739	0.578497	0.560611	0.667156	0	0	0	0	0	0.122534	0.100512	0.0434373	0
740	0.12781	0.0268319	0.361606	0.467643	0	0	0.000576209	0.12542	0.0440513	0.0506369	0	0
741	0.206866	0.145802	0.335656	0.0636234	0.15158	0.414736	0	0	0.20538	0.275124	0	0.0894869
742	0.360421	0	0.0595233	0.134831	0	0.124157	0.12566	0	0	0.0287489	0	0
743	0.430028	0.0135931	0.0969181	0.00203968	0.333709	0.235607	0	0.260241	0.288506	0	0.538149	0.179147
744	0.132848	0.190257	0.464803	0.154638	0.121753	0	0.0478135	0	0.231206	0.00296997	0	0.109769
745	0.186089	0.197909	0.198287	0	0.179788	0.116059	0.196383	0.238353	0.255438	0	0.0413094	0.161212
746	0.457438	0.39264	0.188114	0.0196789	0.112665	0.086583	0.137285	0.102872	0.270032	0.0112415	0.0315841	0
747	0.326713	0.393557	0.0882169	0.0192298	0	0	0.14845	0.115854	0.384797	0.00881812	0.0343852	0
748	0.433708	0.264195	0.0413498	0	0	0.205101	0.0108851	0.0904774	0.180774	0.0380052	0.336351	0.171526
749	0.439459	0.190659	0.0100213	0.0946301	0.216057	0	0.0228217	0.265463	0.202844	0	0.430805	0.105981
750	0.00323474	0	0.201953	0.110928	0.0138597	0	0.14007	0.15687	0.0197848	0	0	0.185601
751	0.325784	1.31092	0.349326	0.00445458	0	0.172681	0.116743	0	0.189947	0.138562	0	0.125889
752	0.41151	0.348043	0.127455	0.0984059	0	0.156206	0.00988254	0	0.291763	0	0	0.191439
753	0.113511	0.242706	0.0859524	0.0306734	0.167513	0.000608348	0.0586079	0	0.104869	0.00722968	0.0028303	0.0628665
754	0.130086	0.321185	0.239962	0.140565	0.224838	0.221483	0.00746193	0	0.0550675	0.0152187	0	0.111515
755	0.428328	0.380015	0.18495	0	0	0.252566	0.0998412	0.113871	0.0670468	0.0548042	0.174001	0.0600652
756	0.191529	0.297904	0	0.0200118	0.19889	0.216813	0	0.266946	0.119221	0.0688066	0.283902	0.214035
757	0.267364	0.860435	0	0.0688274	0.178448	0	0.125619	0	0.335452	0	0	0.0711963
758	0.161133	0.26781	0.304102	0.0207065	0	0	0.0903603	0.125125	0.0518402	0.0336067	0.00507082	0.0652123
759	0.638457	0.414823	0.55941	0	0.244892	0.166715	0.0708656	0	0.125945	0.0453287	0	0.106307
760	0.346139	0.452641	0.130171	0.0143673	0.205395	0.196419	0.095571	0	0.391088	0.0483136	0	0.141506
761	0.381987	0.0742791	0.209578	0.104502	0.2758	0.225068	0.0423531	0	0.166273	0	0.0269328	0.0617966
762	0.356749	0.412457	0.00134011	0.0234852	0.294599	0.0775094	0.00902838	0	0.0955527	0.00569638	0.134937	0.125002
763	0	0.121455	0	0.0873194	0.143876	0.203139	0.0165105	0	0.0244449	0.052174	0.00481379	0.0258563
764	0.435475	0.387508	0	0.0280086	0	0.00122783	0.0711958	0.129403	0.322371	0	0.134113	0.145718
765	0	0.100715	0.013653	0.030637	0.068495	0	0.0181228	0	0.0747121	0	0.0231166	0.0845414
766	0.195996	0.0449628	0	0.0597831	0.448808	0.091606	0.0418314	0	0.12075	0.041591	0.100683	0.0426355
767	0.346375	0.109269	0	0.18928	0.204329	0.0759741	0	0.0767332	0.188148	0.0551057	0.102123	0.0440381
768	0	0.378059	0.175916	0.0426811	0	0.317198	0	0.000893866	0.292995	0.00411378	0.153668	0
769	0.77923	0	0.0546493	0.0723254	0.498962	0.11183	0.0528383	0.360969	0.172397	0.00780535	0.242933	0.0609025
770	0.322926	0.538044	0.500707	0.0937968	0.192127	0.111221	0.0241545	0.134491	0	0.0161531	0	0.0656449
771	0	0	0.552764	0.217235	0	0	0.0883891	0	0	0.00575628	0.00683274	0
772	0.209835	0.0481217	0	0.0709391	0.406892	0.0010448	0.0367437	0.0838311	0.204759	0.0460016	0.0854664	0.0548592
773	0.397783	0	0.451007	0	0	0.208463	0.0420819	0.000726468	0.172901	0.137912	0.00209426	0.0660473
774	0.298579	0	0	0	0.482491	0.238118	0.00595544	0	0	0.0547053	0.46536	0.0908047
775	0	0	0.179967	0.319161	0.206954	0	0	0	0	0	0	0.0717191
776	0.185419	0.518296	0.0129728	0	0.0722414	0.0766902	0.144734	0	0.106477	0.0690036	0.00315131	0.0607447
777	0.205202	0	0.0821733	0.245334	0	0	0.103347	0.118039	0.100295	0	0	0.103089
778	0.305246	0.509438	0	0	0.186026	0.103186	0.126173	0.104986	0.215716	0.0215063	0	0
779	0.389776	0.612552	0.0906649	0.119718	0.0947797	0.0940488	0.0679034	0	0.178066	0	0.0248356	0
780	0.355777	0.187981	0.503731	0.0245782	0.222101	0.242349	0.0100537	0.087925	0.219484	0.125004	0.00969926	0
781	0.296115	0.303928	0.0511451	0	0.166598	0.101205	0.223012	0.000159077	0.381275	0.0365119	0.043991	0
782	0.103725	0.312375	0.0531268	0.0245518	0.081878	0.0853071	0.125037	0	0.254722	0.0681418	0.034154	0.0596581
783	0.174323	0.634913	0.987147	0.0711886	0.218472	0.188982	0	0	0.102062	0.104588	0	0
784	0.310746	0.517463	0.163783	0.0490969	0.662074	0	0	0	0.0997549	0	0.355152	0.0528569
785	0.205325	0.646913	0.572631	0	0	0.00150991	0.0411506	0.000881432	0.105518	0.00911437	0.0297083	0
786	0	0	0	0	0.884749	0	0	0	0	0.0645466	0.127186	0
787	0.377869	0.18973	0.152721	0.00176951	0.162926	0	0.0484198	0	0.126422	0	0.0481518	0.171022
788	0.0541846	0.812008	0.604839	0	0.201222	0	0.0671573	0.10031	0.00191963	0.220966	0	0.0535776
789	0.49845	0.389363	0	0.056624	0	0	0.121766	0	0.373553	0.0324558	0.0727703	0.211771
790	0.395786	0.263905	0.114602	0.00419683	0.209931	0.124945	0.0593995	0	0.204342	0.0725442	0	0
791	0.0360709	0.155735	0.10016	0.0438656	0.181614	0.0872546	0.00856852	0.268771	0.183637	0.00215528	0.423245	0.11554
792	0.436053	0.120145	0	0	0.135311	0.280884	0.00978904	0.0763988	0.141111	0.0432773	0.554715	0.174849
793	0.180697	0.229652	0	0.0562898	0.419957	0	0.11741	0	0.310549	0.0417627	0	0.0806408
794	0.609044	0.274372	0.352841	0.0730727	0.620223	0.0934817	0.0117401	0	0.191026	0	0.0266789	0.126088
795	0.244681	0	0.869057	0.183857	0.193416	0	0.0862828	0	0	0.00320908	0.082986	0.0994391
796	0	0.315845	0.626298	0.0959706	0.124174	0.136133	0	0	0.211811	0.0592085	0	0.200195
797	0.442511	0	0.0351119	0.122565	0.213642	0.103575	0	0.122076	0.079879	0.01966	0.349049	0.160903
798	0.121146	0.218116	0.222568	0.0459677	0.10998	0	0.00705248	0.0777222	0.115116	0	0	0
799	0.385018	0.281487	0.0891489	0	0.411007	0.193901	0	0.240769	0.111263	0.00387719	0.362569	0.0761631
800	0.185603	0.668634	0.20598	0.138978	0	0	0.00200635	0.142843	0.0820473	0.0306198	0.0127187	0.104387
801	0	0.184384	0.123876	0.17725	0.23094	0.156917	0.0725036	0	0.203874	0	0.0502363	0.104219
802	0.25394	0	0.0788849	0.0360807	0.167339	0	0.154505	0	0.0958765	0.0578956	0.0324367	0
803	0.619498	0.327458	0.146229	0.104113	0.238752	0	0.0712981	0	0.18746	0.0788287	0	0
804	0.354316	0.369965	0	0.0398791	0	0.193783	0.0165161	0	0	0.0251988	0	0
805	0.153346	0	0	0	0	0.34316	0.00332644	0.338717	0	0.120499	0.107422	0.109942
806	0	0	0.0039585	0.260384	0.419708	0	0.0954305	0	0.14507	0.0222231	0	0
807	0.0748047	0.407004	0.22846	0.087338	0	0.225655	0.0870406	0	0.181985	0.10388	0	0.12839
808	0	0.166676	0.152358	0.0218713	0.0132659	0.13248	0.045538	0.00087908	0.201482	0.0227836	0.0493094	0
809	0.208045	0.15464	0.112755	0.0444572	0.259772	0.0678087	0	0.156856	0.120983	0.0483114	0.427843	0.0371669
810	0.599749	0.461231	0.0465554	0.0155916	0.285013	0.111335	0	6.77795e-05	0.266009	0	0.264135	0.153109
811	0	0.161777	0.159474	0.028586	0	0	0	0	0	0.0163076	0.0563713	0
812	0.279992	0.198507	0.220268	0.0205238	0.239714	0	0.0727967	0	0.231139	0.00533691	0.0445288	0.090131
813	0.32395	0.21628	0.271968	0.00918254	0.14287	0.247875	0	0	0.352891	0.233606	0.0537047	0
814	0.121188	0.250853	0.0595668	0.230748	0	0	0	0.000598655	0.108479	0.00690887	0.025514	0.11057
815	0.150289	0.210336	0.0801059	0.0993305	0.0995992	0.0839623	0.0269967	0	0.17447	0.0475817	0	0.0871569
816	0.105927	0	0.00442374	0.110439	0.267103	0.00161072	0.0512309	0	0.100351	0.0340681	0	0
817	0	0.303702	0.00748546	0.0640897	0	0.164507	0.234805	0	0.224397	0	0	0.118473
818	0	0	0.0352318	0.00377216	0	0.00384157	0.0420979	0.167403	0.132768	0.0586843	0.35502	0
819	0.500062	0.106966	0.0308988	0.134652	0.242919	0.349126	0.0128368	0.112103	0.0728417	0	0.0614986	0.114126
820	0.189303	0.163218	0.163082	0.0268434	0	0.188031	0.166211	0	0.36314	0.0120169	0.147326	0.281887
821	0.257935	0	0.0581909	0.0273278	0	0.134306	0.166081	0	0.352939	0.000657888	0.00901069	0.110336
822	0.630605	0.153966	0.0658882	0.0192851	0.456098	0.00571862	0.00280711	0	0.216279	0.0264871	0.0655565	0.104218
823	0.219287	0.318567	0.365579	0.0737884	0.150313	0.142042	0.0394127	0.158362	0	0.215957	0.0946893	0.0319383
824	0.253354	0.227454	0	0.0372029	0.00803397	0	0.144513	0.13716	0.320957	0.0388669	0.0658165	0.101839
825	0.542741	0.311455	0	0.00240242	0.165462	0	0.0511016	0	0	0.0358972	0.0544277	0
826	0.263108	0	0	0.0293003	0.225366	0	0.0691784	0	0.154532	0.0663391	0.0503677	0.0818881
827	0.197271	0	0.0137407	0.0712125	0.430093	0	0	0	0.100528	0	0	0
828	0.604664	0.0641514	0.214257	0	0.276647	0.0889219	0	0	0.0882749	0.0442819	0.673837	0.146895
829	0.262771	0	0.190688	0.0350824	0.434659	0.10448	0.0333702	0	0.0360814	0.0817551	0.0232759	0.0512772
830	0.000151417	0.000627354	0	0	0	0	0	0.000399485	0	0.00301382	0.0110457	0
831	0.147855	0.486313	0.201047	0	0	0.00098191	0.0361471	0.190007	0.246374	0	0.204479	0.068094
832	0.173066	0	0.302602	0.00670417	0	0.098311	0.122267	0.000117611	0.275706	0.166412	0.0605264	0.126387
833	0.435273	0.423698	0.147973	0.0636589	0.479758	0.120026	0.115156	0	0.368405	0	0.0783697	0.0505121
834	0.217723	0.332062	0.225819	0	0.208933	0.117876	0.160924	0.243741	0.409008	0	0.012244	0.104252
835	0.381563	0.208124	0.399822	0.0721045	0.0357836	0.106166	0.0569862	0	0.00346335	0.0176734	0.1102	0.0668401
836	0	0	0.251033	0.049097	0.000500519	0.210953	0	0.12608	0.287504	0.0151846	0.193054	0.138464
837	0.614222	0.637368	0.431959	0	0.273973	0.125914	0	0.283429	0.115837	0.361305	0	0.0776348
838	0.225285	0.282254	0.243812	0.0764353	0.407589	0.0859378	0.00566265	0	0.107555	0.0277283	0.274768	0.0691637
839	0.431586	0.672691	0.00392852	0.0142359	0.126074	0.103038	0.194854	0.111632	0.139094	0	0	0.0823139
840	0	0.0897392	0.0112965	0.172236	0.00650676	0	0	0	0	0.0451738	0.10452	0
841	0.156089	0.356499	0.385755	0.0434811	0	0.117087	0.024652	0.125449	0.0102905	0	0.284384	0
842	0.799893	0.218215	0.0158974	0.108336	0	0.160148	0	0	0.256448	0.00697054	0.306096	0
843	0	0.158731	0.158697	0.0946745	0	0.113572	0	0	0.0511226	0.0878189	0.0246206	0.0622226
844	0.0920839	0.041478	0	0.0763629	0.244406	0.0857193	0.11919	0	0.347236	0	0.119824	0.0602515
845	0.380002	0	0.0657753	0.0811358	0	0.192769	0.0785325	0	0.307172	0.0244211	0	0.0744673
846	0.42293	0.566309	0.123441	0.0194209	0	0	0.0267852	0.138216	0.0889338	0.0933445	0	0.0696777
847	0.317014	0.152463	0.265542	0	0.281585	0	0.247176	0	0.213438	0	0	0.0808234
848	0.35322	0.0718047	0.11152	0.120421	0.0340155	0.197593	0.0337718	0	0.161372	0	0.0922566	0
849	0.862779	0.637969	0.117355	0	0.248124	0.315459	0	0.306811	0.112438	0	0.367344	0.157249
850	0	0	0.00503871	0.00204606	0.00470424	0	0	0	0	0	0.0808119	0
851	0.270802	0.807525	0.00968888	0	0.17829	0.192344	0.0998747	0	0.106859	0.0102338	0	0.0678513
852	0.134994	0.405858	0.057643	0.0936707	0	0.206666	0	0.239552	0.270379	0	0.395061	0
853	0.00119926	0	0.195597	0.0603148	0	0.000137759	0	0	0.0150875	0	0.112317	0
854	0.120517	0.543428	0.422329	0.0552883	0.00388142	0.216016	0	0	0.00877689	0.012136	0.00154859	0.0555265
855	0	0.106783	0.00673789	0.120438	0.499413	0.327726	0.0304818	0	0.113828	0.0243971	0.0126056	0.178954
856	0.113666	0.385719	0.195398	0	0	0	0.108854	0.0905741	0.188701	0.00901352	0	0.20688
857	0.207336	0.316442	0.169661	0.0551921	0	0.0732023	0.0523152	0	0.137535	0.0204448	0.0757311	0.0983283
858	0.331003	0.431856	0.187739	0.0259696	0.276408	0	0.12465	0	0.169223	0	0.0457033	0.205074
859	0.146166	0.399366	0.000641126	0.00166615	0.0916697	0.122884	0	0	0.176124	0.0201068	0.0232778	0.0773873
860	0.51871	0.185602	0.0120403	0.0529355	0.177924	0.176644	0.201393	0.120325	0.264333	0.0116143	0.0168323	0.0836413
861	0.355638	0.169427	0	0.0934904	0.274373	0.329205	0.07752	0	0.0866981	0.00257471	0.0461412	0.12892
862	0.393838	0	0.218621	0.00499238	0.0136402	0	0.16447	0	0.117059	0	0.0885101	0.0751171
863	0.254814	0.411369	0.0376366	0.0617445	0	0.00472613	0.124713	0	0	0.00872953	0.0959404	0
864	0.49309	0.318359	0.681325	0	0	0	0.112679	0	0	0.0297533	0.171776	0.0952184
865	0.325074	0.318158	0.075403	0.284597	0	0.102802	0.0618476	0	0	0	0.0408665	0.120304
866	0.230237	0.00178123	0.555078	0	0	0.00160335	0.0152954	0.25306	0	0.0161596	0.0700119	0.0975942
867	0.478478	0.302771	0.144025	0.0288971	0.201469	0	0.178556	0.13385	0	0.00548664	0.0142394	0.0732687
868	0.317206	0.257056	0	0.120866	0.453214	0	0	0	0.0603616	0.015717	0	0.0594451
869	0	0.392797	0.0938579	0.092363	0	0.108158	0.143602	0.238716	0.262607	0	0	0.0643062
870	0.255201	0.318416	0.217999	0.00506565	0.15845	0.375768	0.0167899	0	0.22213	0.224582	0.0779136	0
871	0.154683	0	0.160804	0.149034	0	0	0	0	0	0.0378295	0	0.0719507
872	0.352271	0.261662	0.0440196	0.132708	0.255061	0.232957	0.0080209	0	0.162366	0	0.0821212	0.117505
873	0.560909	0	0.0254544	0.0122111	0.448405	0.108308	0.0620635	8.06698e-05	0.274787	0.0317784	0.0914243	0.227281
874	0.319827	0.159949	0.0992282	0.0828228	0.374767	0.00431105	0.00644477	0	0.100489	0.017449	0.0277789	0.126761
875	0.300508	0	0.69697	0	0	0.0020885	0.048991	0.138107	0.146959	0.0662065	0.119742	0
876	0.324919	0.00397056	0	0.01085	0.00238229	0	0	0	0.223459	0.0292436	0.0116538	0.155128
877	0.186349	0.0303174	0.156043	0	0	0.341783	0	0.139487	0	0.0866045	0.497471	0.0533327
878	0	0	0.31537	0.179448	0.270533	0.00165492	0	0	0.108018	0	0	0.0681782
879	0.201805	0	0.586434	0	0	0	0.182147	0	0.100787	0.209325	0.0253014	0.0997818
880	0	0	0.1561	0.00661507	0	0	0.111198	0	0.153888	0	0.0233411	0.0735516
881	0.151782	0	0.207254	0.136216	0.0155813	0.000919878	0	0	0.192491	0.0232243	0.0149885	0.0526047
882	0.435136	0.481532	0.195287	0.0510831	0.033662	0	0.012981	0	0.146899	0.0161828	0.0660487	0.0967151
883	0.0878064	0.0745151	0.0529793	0.0766737	0.171265	0	0.0295903	0.0367612	0.0374011	0	0.0169468	0.0525123
884	0.281618	0.196509	0.150176	0.0872594	0.243597	0.255214	0.0115235	0	0.0532672	0.0334239	0.0204131	0.06029
885	0.104452	0.153344	0.0944973	0.0916223	0.484572	0.18983	0.0223366	0	0.181161	0.0465439	0.049549	0.0731705
886	0.432501	0	0.0547978	0	0.000379656	0.000713466	0.154282	0	0.0723702	0.00571954	0.12272	0.132797
887	0.3451	0.0823855	0.055857	0.0107818	0.361625	0.232426	0.0654984	0.000372793	0.256117	0.0148235	0	0.0519707
888	0.317322	0.216735	0	0	0.233886	0.108214	0.00640084	0.0945843	0.149213	0.0477441	0	0
889	0.302581	0.382064	0.198942	0.19075	0.535222	0.109027	0.130019	0	0	0	0	0.187645
890	0	0.177596	0	0.39307	0.451245	0.16235	0.0116179	0	0.0284935	0.0589181	0	0.0405543
891	0.256414	0	0.256732	0.0678012	0.0698832	0.0981755	0.0357587	0	0.19083	0.0253286	0.109546	0.14623
892	0.129043	0	0.26758	0.108442	0.0558284	0.195647	0.089887	0	0.17313	0.0179046	0	0.068121
893	0.541812	0.00212169	0.159684	0.182787	0	0	0	0	0	0	0	0
894	0.120352	0	0.0487392	0.156696	0.140658	0.0762137	0	0	0.169582	0.043243	0	0
895	0.613489	0.54777	0.12896	0.0165713	0.200925	0.0912473	0.0604475	0.193317	0.338825	0.109271	0.0575045	0.237643
896	0.0880056	0.438187	0.23384	0.0724679	0.209497	0.15495	0	0.096847	0.11517	0.226661	0.0103254	0.0510542
897	0.300936	0.171416	0.0797902	0.0329076	0.0186653	0.0513937	0	0.156875	0.138813	0	0.269418	0.0888906
898	0.565222	0.289646	0	0.0105351	0	0.167581	0.211542	0.000390917	0.212632	0.0407896	0.0342015	0.210194
899	0	0.285004	0	0.0748878	0.417519	0	0	0	0.222203	0.0156418	0	0.18257
900	0.377296	0.157773	0	0	0.137626	0.066784	0.0894743	0.154521	0.246229	0.0861027	0.0401956	0
901	0.345935	0.914201	0.420893	0.0567006	0	0.0779362	0.0414481	0	0.268403	0.0271242	0	0.0852362
902	0.560276	0.301236	0.0217098	0.0522864	0.216218	0.108701	0	0.358332	0.362259	0.0469684	0.38455	0.177093
903	0.350785	0.322098	0.0545544	0.0557243	0.19232	0.109275	0.10774	2.36603e-05	0.117294	0.0419314	0.0504359	0.202728
904	0.518809	0.128492	0.225388	0	0	0.157176	0.102838	0.127686	0	0	0.400687	0.0957588
905	0.493987	0.102884	0.123871	0	0.456661	0.0579933	0	0.1605	0.0775679	0.0150362	0.499475	0.140533
906	0.310606	0	0.296471	0.00173316	0.276355	0	0.0603856	0	0	0.00559672	0.00076416	0
907	0.235454	0	0.181589	0.184475	0.321639	0.0788605	0.0544906	0.108685	0	0	0	0.0635007
908	0.501749	0.484977	0.326351	0.00767349	0.172127	0	0	0.0919368	0.195047	0	0.336731	0.181458
909	0.0983587	0.618982	0.117491	0.0623948	0.0782977	0.173728	0.0751164	0.000310017	0.175578	0.0146755	0.00899964	0
910	0.268903	0.0956939	0	0.0316407	0.348669	0	0.11325	0	0.321434	0.000240002	0.0441103	0.0617154
911	0.226626	0	0.304596	0.0382794	0	0.096801	0.0150467	0.111929	0.318742	0.039013	0	0.186102
912	0.265391	0.12523	0.0822265	0.0339545	0.594883	0.152732	0.00220804	0.0959668	0.14729	0	0.0364813	0.0635335
913	0.343043	0	0.610607	0.0699574	0.188433	0.227368	0.0464183	0.00119115	0.120099	0.0939683	0.0811574	0.07563
914	0.182138	0	0.0192904	0.00607644	0.855875	0.159604	0	0	0	0	0.223379	0
915	0.139755	0.592777	0.374242	0	0.138134	0.134297	0.0575609	0.240326	0.0782818	0.182419	0.0162314	0
916	0.267674	0	0.0883611	0	0.160793	0.0652201	0.130799	0.0683495	0.448314	0.0214907	0.11772	0.213109
917	0.556235	0.0327359	0.0811777	0	0.451125	0	0	0.14552	0.233652	0.0864877	0.4894	0.138046
918	0.289647	0	0.417207	0.0178666	0.254283	0.191956	0.00841517	0.241247	0.104926	0.177566	0	0
919	0.45216	0.467048	0.0223207	0.0650503	0.584338	0.242157	0.048349	0.202594	0.0836951	0.0180506	0.337408	0.128502
920	0.408306	0.572004	0.168985	0	0	0.106157	0.209069	0	0.186062	0.0335264	0.0356702	0.0644771
921	0.420252	0.117256	0.0277439	0.0645754	0.0155733	0	0.00252029	0	0.0840052	0.0545348	0.0643685	0.12444
922	0.280126	0.289736	0.0114082	0.026671	0.19999	0.216377	0.0112128	0.113593	0.251665	0.0441689	0.425132	0.0767136
923	0.398069	0.4134	0.036511	0.0643662	0	0.150314	0.00325406	0.167438	0.0930477	0.292237	0.0269533	0.0290207
924	0.322206	0.0801275	0.0741745	0.0734473	0.699806	0.0942661	0.00370859	0	0.0573809	0.00874119	0.0234201	0
925	0.508422	0.77027	0.171506	0.0221602	0	0	0.0534939	0	0.143467	0	0.081407	0.157711
926	0.476064	0	0.192122	0.0386168	0.0826524	0.165787	0	0.228729	0.0561112	0	0.255452	0.184602
927	0.0992941	0.715441	0.0873732	0.0528693	0.100539	0.000699039	0.0534171	0	0.143605	0.0565257	0.0364125	0.13666
928	0.558495	0.15403	0.0368609	0.021229	0.362996	0.115634	0.123176	0.194737	0.089546	0	0.195942	0.065196
929	0.261124	0.597799	0.308509	0.0322607	0.139297	0	0.104959	0	0.277757	0.102353	0.030824	0.0963194
930	0.114064	0.454518	0.971233	0.00755523	0	0.152849	0.0426805	0.165672	0	0.223387	0	0.0826463
931	0.300556	0.462397	0.0922523	0	0.324479	0.130268	0	0.316355	0.117115	0.0134471	0.497994	0.199203
932	0	0	0.258829	0.0379181	0	0.00130508	0.224325	0	0.189875	0.0140583	0.0437381	0.192189
933	0.00355162	0	0	0	0	0	0	0.00569653	0.00707787	0.0151345	0.183231	0
934	0.512663	0.344636	0.0615874	0.0172072	0.41202	0.259236	0	0.0919924	0.161568	0.0443002	0.441164	0.139345
935	0.122317	0.0990286	0	0.093117	0.265943	0.109217	0	0.348614	0.105885	0.0105938	0.338591	0
936	0.140867	0.265375	0.129932	0.011462	0.251555	0.194583	0.0236081	0	0	0	0.0312576	0.13367
937	0.27973	0.639814	0.161942	0.0268129	0.116521	0.0794658	0.155845	0.0871664	0.234673	0	0.00599645	0.103787
938	0.359466	0.365545	0.155616	0	0.124766	0.156011	0.151442	0	0.10729	0.0054405	0	0.260545
939	0.501879	0.108482	0	0.0918671	0.595078	0.100336	0.000237939	0	0.107177	0.0321151	0.027548	0
940	0.320762	0	0	0	0.440904	0	0.174726	0	0.22384	0.059204	0	0.117529
941	0.26118	0	0.137875	0	0.216474	0.293672	0.175239	0.158505	0.144464	0	0.324892	0.116032
942	0	0.203132	0.0454572	0.0577915	0.0995502	0.0010015	0.167579	0.218648	0.1697	0.0121241	0	0.106671
943	0	0	0.393478	0.0522588	0.740608	0	0	0.000331559	0.153939	0.0163041	0.0700479	0
944	0.290831	0.213215	0.280647	0.375584	0.387888	0	0.0058401	0	0	0.0431345	0.00325089	0.0751209
945	0	0.311945	0.0529351	0.143548	0.280949	0	0.12357	0.111974	0.341988	0	0.0204785	0.124172
946	0.280604	1.1151	0.0469464	0.104465	0.0805622	0.0843925	0.0596004	0.10446	0.08408	0.0560378	0	0
947	0.10853	0.122333	0.0870715	0.091634	0.248017	0.185014	0	0	0.222097	0.0238231	0.0321494	0.138437
948	0.537696	0.775749	0.0618282	0.0307734	0.144866	0	0.183596	0.110515	0.00273633	0.0225272	0.0655174	0.0941161
949	0.517911	0.359448	0.127106	0	0.235774	0	0.12609	0	0.169562	0.0350554	0.00759168	0.0717421
950	0.328837	0.158542	0.121205	0	0.634714	0.138746	0	0.360149	0.380031	0.0546761	0.462261	0.0734035
951	0.353731	0.226811	0.162352	0.0464634	0.410336	0	0.0151089	0	0	0.00764277	0.163447	0.162537
952	0.915994	0	0	0	0.455164	0	0	0	0	0	0.142886	0.215838
953	0.532518	0.252808	0.226781	0.00982561	0.267546	0.220788	0.0277744	0.184383	0.060139	0	0.22099	0.145133
954	0.170872	0.248602	0	0.235318	0.186927	0.232438	0	0.134798	0.0734041	0.00581784	0	0.0670935
955	0	0	0.238242	0.193255	0.353957	0.102869	0.0322633	0	0.121973	0.0560778	0.00442333	0.0923679
956	0.0302869	0.00593733	0.00582066	0.016382	0.00622387	0	0.0118632	0.00083313	0.056165	0.00812568	0.0151905	0.0265066
957	0.160252	0	0.11282	0.0909576	0.221933	0	0.0668515	0	0.222079	0.0131849	0.0121683	0.168303
958	0.325825	0.40836	0.133988	0.0636521	0.318864	0	0.182901	0	0	0	0	0.0833444
959	0	0	0.116327	0.0957669	0	0	0.0493592	0.270424	0.0676037	0.145332	0.153094	0.199575
960	0.439613	0.297616	0.139081	0.0435082	0.00601582	0	0.0151462	0	0.235914	0.0388054	0	0.129021
961	0.518692	0.411535	0.125449	0	0.128114	0.0965284	0.0818905	0.000286083	0.16837	0.0166737	0.0317615	0
962	0.227486	0.201436	0.261177	0.361356	0	0.138455	0	0	0.076836	0	0	0.0749981
963	0.109168	0.15487	0.00248554	0.14497	0.14985	0	0	0	0.165565	0.00167627	0.0623293	0
964	0.181169	0.354571	0	0.0833227	0.233703	0.191621	0.00686426	9.21411e-05	0.119793	0.0308671	0	0.0648836
965	0	0	0.0895728	0.304016	0.31361	0	0	0.30222	0.109253	0.0104001	0	0.0379035
966	0.464211	0.39832	0.302796	0.00655172	0	0	0.204594	0.133217	0.134097	0	0	0.0795185
967	0.199425	0	0.321785	0.0219392	0.0901762	0.112888	0.143862	0	0.404821	0.01183	0.043379	0.140298
968	0.639607	0.123612	0.140497	0.0158181	0.164229	0.242749	0	0.274029	0.101443	0.0211353	0.411041	0
969	0	0	0	0.017759	0	0.00069021	0	0	0	0.168407	0.403327	0
970	0.327028	0.270999	0.168061	0.0158097	0	0.102895	0.0487358	0.0857222	0.15148	0.0581884	0.0298793	0.127418
971	0.217154	0	0.421719	0.0530486	0	0.209926	0.0561987	0.148149	0.176528	0.111512	0.0437008	0.0541987
972	0.268406	0.536233	0.35595	0.0312776	0	0	0.0848231	0	0.0572156	0.0283277	0.0468641	0.0568688
973	0.331751	0.537593	0.252539	0.0267125	0.236189	0.334963	0.00367664	0.209036	0.120079	0.351518	0	0.0950176
974	0.35869	0.221293	0.0261056	0.12075	0.605098	0	0.0577514	0	0.158452	0.00959516	0.0405599	0.061466
975	0.312082	0.557124	0.235981	0.0149499	0	0.165928	0.0387695	0.204389	0.0397501	0.214859	0	0.0918738
976	0	0.0712996	0	0.125424	0.0280695	0.276191	0.0435416	0	0.190379	0	0	0
977	0.35906	0.245333	0.558856	0.0348722	0	0.242192	0.0955566	0	0	0	0.126468	0
978	0.292014	0.438222	0.348143	0.017167	0	0.136074	0.0204201	0	0.281254	0	0.133755	0.228785
979	0.22397	0.206755	0.139131	0.0697866	0.124845	0.00254767	0.088997	0	0.188448	0.0442744	0.0672264	0.117965
980	0.720057	0.26929	0.0801006	0	0.391569	0.277452	0	0.114869	0.334706	0.00912044	0.311754	0
981	0	0	0.0364079	0.0678676	0.114252	0.0590433	0.0180427	0.0456105	0.00197158	0.00140195	0.035788	0.0567694
982	0.27057	0.238295	0	0.0952371	0.237492	0.183965	0.00516826	0	0.124969	0.0165431	0.0469112	0.182803
983	0.287011	0.246448	0.163631	0.0206357	0.179628	0.513127	0.0924784	0.103981	0.228889	0.244884	0	0.085583
984	0.148952	0.221247	0.121027	0.133189	0.402281	0.122036	0	0.151418	0.188253	0.0415899	0.41933	0.0340719
985	0.440633	0.317037	0.121752	0	0.311078	0.293595	0	0.15632	0.0443638	0.0413436	0.387048	0.215597
986	0	0.0377524	0.506242	0.037748	0.126268	0	0.0414096	0.000197926	0	0.0412119	0.000833295	0.0803084
987	0.375675	0	0.28779	0	0	0.203903	0	0	0.296725	0.0761061	0	0.0858224
988	0.54202	0.738569	0	0.10945	0.272051	0	0.102926	0.135491	0.325153	0.00343369	0	0
989	0.530239	0.455477	0.0799756	0.0883736	0.211375	0	0.0458783	3.00064e-05	0	0.152925	0.117695	0.143727
990	0.293148	1.0222	0.221125	0.0548703	0.270126	0.255082	0.0199518	0.221254	0.0947373	0.224729	0	0.0422744
991	0.118134	0.376602	0.200748	0.0466242	0	0.262304	0.0311996	0.141115	0.441248	0.00135359	0	0.114726
992	0.452376	0	0.0610031	0.050786	0.164419	0.000549532	0.00627069	0	0.0673206	0.025849	0	0.0841461
993	0	0.144983	0.193806	0.14447	0.282369	0	0	0	0.187456	0	0	0.114635
994	0.0496237	0	0	0.138629	0.113974	0	0.0408486	0	0	0.0803067	0.0174678	0
995	0.308641	0.260133	0.23653	0	0.186998	0.154377	0.0389967	0	0.100178	0	0.403495	0.044449
996	0.423656	0.539443	0.150529	0.0236715	0	0	0.0772696	0	0.250759	0	0.0465554	0.0695578
997	0.223757	0.258495	0	0	0	0	0	0.25369	0.0762362	0.086087	0.278431	0
998	0.133179	0.613034	0.24192	0.0114283	0.109885	0.16545	0.045281	0.0019822	0.269678	0.0521194	0.0370301	0.0477274
999	0	0	0.754095	0	0	0	0	0	0	0	0	0
1000	0.524396	0	0.0550477	0.0951788	0	0.287804	0.0908985	0.119651	0.0815829	0.0174236	0.0531329	0.0606774
1001	0.350958	0	0.0665343	0.135037	0	0.101715	0.033282	0	0.169952	0.0466501	0.0306977	0.0992929
1002	0.341292	0.0949593	0	0.0453638	0.21614	0.00112882	0.140581	0	0.343022	0.0191894	0	0.255649
1003	0.0964974	0	0.0101611	0.0400248	0	0.0826191	0	0.0887146	0.346534	0.0526528	0.0471654	0.172916
1004	0.417596	0.358631	0	0.028651	0.185761	0.190581	0.11984	0	0.240485	0	0.0312036	0.18724
1005	0.135355	0	0.126622	0	0.181508	0.339113	0.100516	0	0	0	0.518428	0.113435
1006	0.244168	0.260139	0.460343	0.048656	0.18472	0.186862	0.0068053	0.119681	0.165033	0.237058	0	0.0334922
1007	0.633171	0.280716	0.0863826	0	0.100084	0	0.137716	0	0.346454	0.017237	0.0102385	0.168902
1008	0.564328	0.143864	0.141803	0.0491697	0.459309	0.00466626	0.0175306	0.106267	0	0.00330339	0.14212	0.0753093
1009	0	0	0.0869918	0.000644268	0	0	0.00448075	0	0	0	0.0300671	0
1010	0	0.229316	0	0.253937	0.296482	0	0	0	0.15538	0.0355953	0.0556208	0
1011	0.391624	0	0.0238626	0.00580813	0.334193	0.206822	0.123629	0	0.374455	0.0160801	0.0729838	0.108629
1012	0.346596	0.282344	0.297539	0.0258124	0	0.32771	0	0.228894	0.23953	0.315869	0.00355535	0
1013	0.113488	0.131703	0.211093	0.283856	0.291027	0.0862255	0.0465887	0	0	0	0	0.0451283
1014	0.378091	0.309308	0	0	0.40186	0.0669282	0	0.137536	0.274465	0	0.40976	0.158149
1015	0	0	0.0734036	0.0351395	0	0.257842	0.0187002	0.191444	0.293636	0.149478	0.0796318	0
1016	0.211772	0	0.962878	0	0	0	0	0	0.166463	0.0901869	0.11346	0
1017	0.23861	0.531679	0.157046	0.0384527	0	0.101833	0.0679595	0	0.0849189	0.0559168	0.153527	0.0638925
1018	0.188149	0	0	0.031439	0.181456	0	0.222677	0.115556	0.319657	0.0190668	0	0.174532
1019	0.457975	0.353285	0.0951759	0.00784571	0.369181	0	0.0504204	0.000895141	0.14524	0.00102124	0.264354	0.126692
1020	0.507254	0.318476	0.203584	0.00852065	0	0	0.248454	0	0.354638	0.0130788	0	0
1021	0	0	0	0.00713447	0	0	0.0289708	0	0.00360363	0	0.12215	0
1022	0.228488	0.665037	0.318799	0.0845933	0	0.200658	0.0169756	0	0.328706	0	0	0
1023	0.0802567	0.257648	0.6166	0.0574223	0	0.20769	0	0.189185	0.180377	0.0103825	0.322584	0.084697
1024	0	0.0109962	0.0218887	0.0124742	0.00248051	0	0.0286014	0	0.000196032	0	0.00797571	0
1025	0.126142	0.198905	0.231565	0.0700972	0.162455	0	0.167763	0	0	0	0	0
1026	0.485601	0	0.0124944	0.00173459	0.263569	0.17331	0	0.122208	0.1174	0	0.217342	0.0936594
1027	0.245606	0	0.300921	0.0246458	0.107973	0	0.00523209	0.101719	0.160759	0.0456206	0.371489	0.118466
1028	0.463374	0.45397	0.285503	0.00700784	0.200954	0.303987	0.0207412	0.215437	0.191765	0.117201	0.0333528	0
1029	0.280925	0.38446	0.00484677	0.0100593	0.0945406	0	0.0408765	0	0.301603	0.0466333	0	0.171157
1030	0.790402	0.129218	0.139167	0.040882	0.483623	0.152601	0.0263456	0.0967152	0.120553	0	0.314262	0.160611
1031	0.347289	0	0.063726	0.238657	0	0.26889	0	0	0.205089	0.0698711	0.0593037	0.106775
1032	0.109154	0.671157	0.484355	0.0427853	0.177392	0	0.0170444	0	0.0197589	0.0800295	0	0.0325079
1033	0.411329	0.101927	0.0142853	0	0.279252	0.192936	0	0.2279	0.166668	0.0820703	0.405042	0.22782
1034	0.182619	0.310608	0.192968	0.196251	0	0	0.00164671	0	0.191338	0.0826889	0	0.133832
1035	0.390376	0.30616	0.107055	0.0576334	0.292316	0.175923	0	0	0.28161	0.0359944	0.309314	0.0921612
1036	0.344839	0	0.251491	0.00395492	0.130841	0.0888488	0.076742	0.108559	0.236268	0.042945	0.0356338	0.0928819
1037	0.378583	0.323744	0.282838	0.0107207	0	0.0941343	0.102658	0	0.176777	0.0905579	0.043144	0.108504
1038	0.468965	0	0.0741827	0.0745832	0.175999	0.20824	0.0483273	0.219903	0.10314	0	0.349156	0.0724397
1039	0.0757281	0.0964094	0.25027	0.341565	0.30288	0	0	0.113576	0	0.00213252	0	0.0721949
1040	0.209423	0.0450676	0.550794	0	0.15554	0.147742	0.0405784	0.169326	0	0	0.326572	0.0974845
1041	0.357813	0.0872831	0.0893892	0	0.22359	0	0.0856155	0.238146	0.133076	0	0.636428	0.114939
1042	0.0703325	0.337126	0.151898	0.0515669	5.80286e-05	0.193367	0.120442	0	0.129272	0	0.251189	0
1043	0.0969879	0.683735	0.336075	0.0610049	0.177169	0.167571	0	0	0.14177	0.256361	0.0125632	0.0238538
1044	0.456884	0.0863085	0.161049	0	0.303149	0.0476075	0	0.235817	0.148832	0.0343316	0.488325	0.188194
1045	0.534803	0.332322	0.0930137	0.0180216	0.148556	0.225316	0.0196189	0.00184246	0.225006	0.223109	0	0.0985296
1046	0.289318	0	0.305806	0	0.371632	0.299001	0.0756896	0.123334	0.230632	0.0441279	0.150008	0
1047	0.386162	0	0.43372	0.0487765	0.178279	0.150602	0.0904571	0.110841	0	0	0.367225	0.218842
1048	0.34035	0.243494	0.152516	0.0440774	0.000677223	0.160485	0.00194708	0.0994874	0.171387	0.0441987	0.0999574	0.0677034
1049	0	0	0.0430013	0.0874306	0.0260549	0.203503	0	0	0.089326	0.0122797	0.0267197	0.070586
1050	0.249988	0	0.0842346	0.0176776	0.293738	0.300187	0.00314604	0	0	0.0244864	0.189178	0
1051	0.51713	0.41266	0.182382	0	0	0.205293	0.263621	0	0.474975	0	0	0.296478
1052	0.501688	0.288568	0.521077	0	0.262397	0.155476	0	0.214167	0.322068	0.139085	0.0833628	0.0723454
1053	0	0	0.122171	0.0227179	0	0.428795	0	0	0.387263	0.000263547	0.0745924	0
1054	0.171175	0	0.0281747	0.119454	0.349003	0.118725	0	0	0.359633	0	0.143595	0.142008
1055	0.160585	0.38389	0	0	0.0805671	0	0.124955	0	0.170709	0.00434424	0.021866	0.0888147
1056	0.260473	0.140052	0.0849379	0.180724	0.353463	0.000517725	0	0	0	0	0	0
1057	0.0304453	0	0.373964	0.0214027	0.134308	0.10716	0.135045	0	0.0771911	0.074925	0	0
1058	0.216618	0.287857	0.0220394	0.00740133	0	0.151947	0.0029926	0.264487	0.476568	0.0193144	0.400096	0.134142
1059	0.512236	0.341144	0.0635572	0	0.300276	0.150927	0	0.265721	0.249741	0	0.549756	0.185261
1060	0.115294	0.218966	0.194339	0.12608	0	0	0.0215458	0	0.0456178	0.0336659	0.0830456	0.0403255
1061	0.42158	0.0338532	0.072949	0.0293046	0.420199	0.105358	0	0.183071	0.290922	0	0.43935	0.217899
1062	0.227847	0.181974	0.120811	0.0378011	0.0309292	0.171682	0	0	0.122936	0.0318835	0.183684	0.171236
1063	0.278616	0.520616	0.409061	0.0543934	0.102528	0.200647	0.00994986	0.332326	0.181051	0.225064	0.0892165	0
1064	0.552506	0.51062	0.125747	0.0155131	0.48958	0	0	0.244927	0.169643	0.0706895	0.519966	0.179165
1065	0.384288	0.482919	0.0945446	0.0264673	0	0	0.119615	0	0.117784	0.0530292	0	0.0801954
1066	0.703538	0	0.240364	0	0	0.183839	0.280782	0	0.484913	0	0	0.167446
1067	0.319299	0.0749459	0.0808449	0.0203007	0.307342	0.0897674	0	0.000223328	0	0.00948479	0.499631	0.0960489
1068	0.54687	0.425027	0.21456	0.000208242	0	0	0.0554271	0	0.222476	0.0941342	0.00662744	0.0852526
1069	0.211946	0	0.0874761	0.104446	0.245395	0.207068	0	0	0.199618	0.0643161	0.138952	0.0543385
1070	0.131891	0.168918	0.291735	0.164444	0.0415536	0.110444	0.051691	0	0.226045	0.0438242	0.0632515	0.0500295
1071	0.126939	0.00302008	0.125858	0.0215513	0	0.114154	0.0395334	0	0.1087	0.0339563	0.0145799	0.121215
1072	0.0867129	0.247024	0.317293	0.337186	0.0744319	0	0	0	0.155825	0.0402492	0	0.133009
1073	0	0.119895	0.132652	0.00213115	0.214086	0.0871778	0.0143576	0	0	0.0140409	0	0
1074	0.35732	0.202293	0.00302475	0.0314299	0	0.00125608	0	0	0.0775895	0.00229972	0.271167	0.0876412
1075	0.384367	0.464965	0.264739	0.0111932	0.294163	0.00060863	0.0836188	0	0.174966	0.0396961	0.0325331	0
1076	0.17723	0	0.354897	0.138275	0.010337	0.119565	0	0.135185	0.155741	0.0131932	0	0.0697428
1077	0.222465	0	0.553929	0.168383	0.189311	0	0.079744	0.128513	0	0.112802	0.213191	0
1078	0.063277	0.334103	0.191768	0.0353826	0.227184	0.103275	0.122839	0	0.204657	0.0935846	0.0731287	0.122035
1079	0.238365	0	0.0435613	0.120289	0.380539	0.0876491	0	0.17891	0.076175	0.012171	0.0115076	0.0541893
1080	0.0847604	0	0.119972	0.00553124	0.0259474	0.234122	0	0	0.0582137	0.0766913	0.131095	0.153296
1081	0.311465	0.00949588	0.0387664	0.0224981	0.348649	0.00152435	0.0598315	0	0.185565	0.0411486	0.0217645	0.118299
1082	0.201581	0	0	0.155876	0.38719	0.00228749	0	0	0.195743	0.0329052	0.0864615	0
1083	0.189203	0.217627	0.37555	0.0527839	0	0.11635	0.172677	0	0.201436	0.00511222	0	0.0723064
1084	0.156355	0	0.172535	0.0411119	0	0.119965	0.111856	0.000623217	0.100253	0.00325244	0.0622543	0.173054
1085	0.245177	0.780819	0.488444	0	0.18602	0.116566	0	0	0.367485	0.0722145	0	0.055839
1086	0.387159	0.334275	0	0	0.618047	0	0	0.174953	0.326471	0	0.679096	0.205046
1087	0.0796067	0.720373	0.115444	0.140576	0.0797606	0.173728	0.0143382	0	0.0585515	0.12615	0	0.0720073
1088	0.172229	0.70167	0.589239	0.107869	0.104121	0.118586	0.0576846	0.155476	0.0794202	0.00395725	0	0
1089	0.526669	0.771082	0.0712392	0.00450912	0	0	0.110182	0	0	0.0247452	0	0.00043671
1090	0.183199	0.387268	0.107048	0.145679	0	0.131458	0.142948	0	0	0.0270406	0	0.119082
1091	0.448649	0.291245	0.330763	0.0508633	0	0	0.0730486	0	0.204769	0.00623344	0	0.176647
1092	0.208907	0.176681	0.251599	0.0467991	0.198813	0.109821	0	9.48884e-05	0.0895758	0	0.0661631	0
1093	0.320601	0.0775468	0.0825903	0.0674137	0.275716	0.00017244	0.0553109	0	0.146079	0.0321801	0.040387	0.0886009
1094	0.584329	0	0.237118	0.047054	0.492703	0.192492	0	0.117685	0.302089	0	0.401289	0.0696497
1095	0.0741115	0	0.0517231	0.401634	0	0	0.101432	0	0	0.00702713	0	0
1096	0.588782	0.0612038	0	0.115924	0.410732	0.000268746	0.0196027	0	0.176223	0.0817617	0.0701854	0.0449412
1097	0.435104	0.0741899	0.0877567	0	0.114324	0	0	0.262854	0.0999264	0	0.412695	0.0986772
1098	0.402219	0.289771	0	0	0.416898	0.203998	0.00205817	0.332274	0.174368	0.0518394	0.362678	0.1124
1099	0.345657	0	0.137237	0.0328712	0.0273772	0.0781528	0.0736054	0	0.300407	0	0.079224	0.0923408
1100	0.918046	0	0.102992	0.0485431	0.400251	0.16931	0	0.201312	0.0711665	0.0361185	0.345312	0.204468
1101	0.00287777	0.319112	0.0534964	0.0146925	0	0.00168275	0.196608	0.111099	0	0.012664	0	0.152227
1102	0.202575	0.2614	0.188083	0	0.280687	0.22987	0	0	0.159411	0.0160552	0.578356	0.172638
1103	0.284085	0	0.0967246	0	0.144917	0.109977	0.128817	0.120779	0	0.0726366	0	0.197719
1104	0.392074	0.289461	0.0955675	0.121113	0.445622	0.0912036	0.0351768	0	0.174679	0.0212954	0.110788	0
1105	0.494629	0.543268	0.296571	0.0278199	0.209666	0.130573	0	0.148842	0.0914042	0.00414779	0.37647	0.133939
1106	0.642638	0.445032	0.219052	0.0535534	0	0.239151	0	0.0011632	0	0.0247133	0.00891757	0
1107	0.181107	0.0704407	0.18326	0.0955242	0.203188	0.00293421	0.0635145	0	0.0608827	0	0.0773321	0.098909
1108	0.514049	0.126021	0.444836	0.0491812	0.205197	0.14535	0	0.0840751	0.118292	0	0.278925	0.235267
1109	0.373899	0.269351	0.0312285	0	0.472196	0.140745	0	0.227105	0.175703	0.017286	0.360526	0.104418
1110	0.549934	0	0.00535135	0.032585	0.189277	0.226123	0.0127057	0.223108	0.0793595	0.00739624	0.308114	0
1111	0.151643	0.355623	0.218334	0.0181827	0.00150811	0.00022897	0.0678354	0	0.27993	0.00383145	0.00986268	0.0715187
1112	0.443032	0.403695	0.196851	0.00707821	0.0956125	0.34034	0	0.0909552	0.353079	0.104169	0.0605723	0.141702
1113	0.232918	0	0.455284	0.0169749	0.0227265	0	0.0455519	0	0.0807504	0.0204778	0.0786436	0
1114	0.203004	0.43439	0.718599	0.0620509	0.294824	0.208846	0.0283662	5.92272e-05	0.160551	0.119699	0	0.0800895
1115	0.276505	0.0555761	0	0.00560019	0.070037	0.121313	0	0.062542	0.129262	0	0.226738	0.086476
1116	0.227891	0.178355	0.0100801	0.0625559	0.426346	0.20824	0.0233442	0	0.222577	0.0104971	0.0697293	0
1117	0	0	0	0.0893932	0.313	0	0	0.000812106	0	0.0581251	0	0.0448129
1118	0.397838	0.295169	0	0	0.304583	0.119807	0.130329	0	0.153111	0.00729224	0	0.177314
1119	0.291283	0.301917	0.026933	0.0511039	0	0.235635	0	0.165084	0.224665	0.293781	0.00896092	0.0475941
1120	0.262981	0.388854	0.00433515	0.0232372	0	0.107673	0.165163	0	0.321748	0.00875522	0.0594017	0.251857
1121	0.341973	0.153802	0	0.0598426	0.415452	0.155061	0.0502049	0	0.149953	0.0224649	0.081034	0.0831295
1122	0.18754	0.00419522	0.0697803	0.043184	0.0914405	0.187554	0.075634	0.000135802	0.220169	0.104425	0.00936936	0.041782
1123	0.541673	0	0.133891	0.0390332	0	0.273874	0.0218639	0.00103957	0.0604928	0.205605	0.036186	0.0720049
1124	0.46229	0.308795	0.283082	0.0460425	0.236736	0.116174	0.00496252	0.143037	0.171428	0.0141577	0.276775	0
1125	0.314591	0.466946	1.05661	0.0259919	0.317703	0	0.0545973	0	0.185557	0.0236559	0	0.10622
1126	0	0	0	0	0.790747	0	0	0	0	0.0899054	0.415483	0
1127	0.489269	0	0.275231	0	0.200247	0.183095	0.0162219	0.143635	0.118091	0	0.338514	0
1128	0.164214	0.14301	0.522371	0.024912	0.0998341	0.267491	0	0.0730222	0.0275856	0.323421	0	0.0379703
1129	0.411758	0.12843	0.184409	0.0119965	0.495264	0.0906349	0.14354	0	0.136426	0.0208804	0.0479443	0.062914
1130	0.00527954	0.180917	0.330318	0	0	0.00404166	0.0684506	0	0	0.0175167	0.102447	0
1131	0.497215	0	0.165041	0	0.156234	0.234736	0.0243468	0.0783519	0.266983	0.0178977	0.435879	0.106167
1132	0.204871	0.195718	0.073511	0	0.249931	0.105123	0.166414	0	0.253178	0	0	0.156317
1133	0.594086	0.323045	0.0495106	0	0.189153	0.140245	0.00687306	0.178864	0.170729	0	0.508087	0.176944
1134	0.376579	0.341671	0	0	0.00187713	0	0.0575932	0.101638	0.0971721	0.0610839	0.0188509	0.0888418
1135	0.517234	0.30825	0.115734	0.116442	0.250825	0.155442	0.0111077	0.266226	0.117555	0.0696474	0.392154	0
1136	0.187954	0.156063	0.299196	0	0	0.188131	0.0107243	0.257794	0	0.0117629	0.326634	0
1137	0.292741	0.178299	0.175783	0.0806908	0.124443	0.128106	0.0690335	0.0765558	0.073579	0.0128356	0.26204	0.0740148
1138	0.527247	0.830335	0.505289	0.0183761	0.123174	0.109521	0.0858791	0.211815	0.105216	0.0296464	0	0.0734723
1139	0.235056	0.66899	0.346202	0	0.0669501	0.206804	0.00813592	0.123552	0.0636919	0.231957	0.0756401	0.0335578
1140	0.231801	0.283151	0.248636	0.0688311	0.281666	0.257791	0.0694864	0	0.189042	0	0.323031	0.0481381
1141	0.33466	0.00992678	0	0.127025	0.25274	0.170791	0.0469233	0.188008	0	0.0204026	0.0445173	0.195747
1142	0.503252	0.121341	0.121906	0.0980413	0.507041	0.199667	0.0705736	0	0.0872054	0.0411595	0.359754	0.0652023
1143	0.315984	0.331534	0	0.00745097	0.179772	0.194414	0.021485	0.234322	0.184199	0.0816244	0.25528	0.183634
1144	0.182042	0.349056	0.0435571	0.0493864	0.279031	0.120695	0.0278902	0.128679	0.225689	0.0109561	0	0.0684384
1145	0.425685	0	0.268927	0.052375	0	0	0.136382	0	0.155788	0	0.035648	0.0963449
1146	0.68814	0.098021	0	0	0.664601	0.18726	0.0177468	0.338938	0	0.0558858	0.450256	0.217733
1147	0.513167	0.371568	0.259295	0	0.245473	0.146119	0.00666098	0.212127	0.217846	0.00752395	0.287103	0.0481172
1148	0.24835	0.358185	0.215131	0.00576729	0	0.101197	0.0360263	0	0.153957	0.0496824	0	0.0626746
1149	0.754556	1.09519	0	0.0665505	0	0.141081	0.209847	0.157277	0	0.0188004	0.0871582	0
1150	0.380556	0.276622	0.131945	0.0457397	0.0119499	0.225147	0.0723147	0	0.0761412	0.00122605	0.00114047	0
1151	0	0	0	0	0.00474266	0	0	0.0029937	0	0.000471252	0.142291	0
1152	0.182422	0.507112	0.151447	0.0172225	0	0.12412	0.10289	0	0.253318	0.0743498	0.035729	0.0644957
1153	0	0.139731	0.053876	0.00815958	0	0	0.0284475	0.00029167	0.102565	0	0.210758	0.101367
1154	0.239779	0.171436	0.00649305	0.0596055	0.488486	0	0.0216882	0	0.192712	0	0.00181249	0
1155	0.285335	0.400494	0.167232	0	0.577205	0.241135	0	0.148262	0.180788	0	0.363375	0.0452075
1156	0.355194	0.405695	0	0.0618447	0.415207	0.106681	0.0725965	0	0.237802	0.00196295	0.0945721	0.0725247
1157	0.240754	0	0.123464	0.357844	0	0.236182	0.0271247	0	0.113737	0	0.0551309	0.0665311
1158	0.802345	0.522149	0.48509	0	0	0.169221	0.085504	0.188133	0.0787634	0.186565	0	0.0503103
1159	0	0.112481	0.426597	0	0.11078	0.0872955	0.156968	0	0.192199	0	0.0605588	0.0715728
1160	0.231383	0.0763879	0.112367	0.321707	0.23669	0.132717	0.0357107	0	0.0523007	0.0101183	0.0503016	0
1161	0.407514	0.773239	0.0193565	0.0336676	0.194434	0.192456	0	0.127429	0.136652	0.265836	0	0.117979
1162	0.127486	0.0937193	0	0.10102	0.0542956	9.6063e-05	0.00580186	0.112458	0.108009	0.053946	0.0382967	0.0525913
1163	0.453765	0	0.0610313	0.0906095	0.335827	0.223542	0.0042476	0.169556	0.211751	0	0.324254	0
1164	0.393342	0.389115	0.028557	0.0362875	0.217937	0.000340184	0	0	0.362393	0.0178921	0.262745	0.147299
1165	0.0313928	0	0.0637566	0.342394	0	0	0	0	0	0.10405	0	0
1166	0.436989	0.435798	0.33191	0.146838	0	0	0.0941042	0	0.0904556	0.0419404	0.0445653	0
1167	0.512986	0.602679	0	0	0	0.102827	0.113033	0	0.433685	0.0519537	0.0753002	0.23399
1168	0.31145	0.640353	0.335709	0.0251492	0	0.0820643	0.098609	0	0.190684	0.0259757	0.0283039	0.0416431
1169	0.331403	0.495686	0.316682	0.0325486	0.263601	0.194179	0	0.187223	0.1147	0.0566175	0.411426	0.0946609
1170	0.194685	0	0.097368	0.0357189	0.522315	0.147173	0.0118415	0	0.160422	0.0317901	0	0.0866547
1171	0	0.220642	0.238193	0.0633189	0.232007	0.138615	0.0115769	0	0.00430242	0.0273768	0.0499044	0.148066
1172	0.00713774	0.100878	0.287553	0.239362	0	0	0.0433324	0	0	0.00426429	0.0108257	0.0535516
1173	0.669808	0.413229	0.149348	0.0896447	0.251584	0.118259	0.0392199	0.310081	0.10493	0	0.22506	0.0778553
1174	0.332393	0	0.692991	0	0	0.00311745	0.0441777	0	0.14014	0.0102249	0.334317	0.0916577
1175	0	0	0	0.0216183	0	0.331498	0.0898319	0.267424	0	0	0.0465096	0
1176	0.182238	0.00557509	0.138	0.0129845	0	0	0.165167	0.00121689	0.317057	0.00916735	0.00854853	0.165094
1177	0	0.537336	0.0121009	0	0	0.00484687	0	0.343112	0	0.0311651	0.0964534	0
1178	0.351952	0.905221	0.654536	0.000598027	0.124359	0	0	0.104549	0.0275617	0.0685938	0	0.0382315
1179	0.37642	0.498453	0.216605	0.0104869	0.263395	0	0	0	0.25071	0.0016954	0.256139	0.153402
1180	0.206532	0.630773	0.117432	0.161831	0.308238	0	0	0	0	0	0	0.0845227
1181	0.443607	0.899014	0.0856432	0.000154221	0	0.332564	0.0478923	0.199149	0.256163	0.24435	0.0159034	0.0315595
1182	0.118737	0.191127	0.105082	0.0343073	0.213816	0.0876894	0.0412864	0.0755875	0.144222	0.0232446	0.117324	0.0517748
1183	0.531826	0.225173	0	0.067303	0.285013	0.108299	0.00932041	0	0.202332	0.0247155	0.0923369	0.121634
1184	0.517643	0.427581	0.398593	0.0135217	0.133868	0.172999	0.0287024	0	0.182461	0	0.19556	0.0937072
1185	0.170026	0	0.033365	0.0783216	0.220674	0.06994	0.0797505	0	0.081501	0.0125436	0	0.0484464
1186	0.11136	0.212657	0.292309	0.0143501	0.299254	0.231533	0.0317784	0.000353357	0.190416	0	0.236778	0.121588
1187	0.309895	0.40042	0.0740527	0.11844	0.317348	0	0.0409595	0.105033	0.0303978	0	0	0.0501284
1188	0.241458	0.300325	0.137704	0	0.205444	0.077974	0.050636	0.0897943	0.23141	0.0528313	0.283636	0.0964238
1189	0.133132	0.265504	0	0.0123289	0.00581744	0.334034	0.0467186	0.302379	0.13135	0.00802815	0.144828	0
1190	0.165435	0	0	0	0	0.390686	0.0245746	0.322261	0.277769	0.04947	0.559029	0
1191	0.235278	0	0.33984	0.0383044	0	0	0.0671272	0	0.142408	0.0030427	0.123693	0.097972
1192	0.0936747	0.213887	0	0.1204	0.00446883	0.000610325	0	0.0973413	0.163745	0.0375431	0.00922882	0.041595
1193	0.484025	0.156305	0.0512903	0	0.197936	0	0	0.182702	0.173336	0	0.306845	0.112
1194	0.313369	0.359257	0	0	0	5.52859e-06	0	0.142078	0	0.023184	0.258329	0.0795709
1195	0.571082	0.206393	0.193759	0.00633634	0.181116	0.159244	0	0.232803	0.233183	0.0355137	0.30384	0.159074
1196	0.446736	0.200044	0.188888	0.140339	0.264825	0	0.056149	0	0.119633	0	0.105679	0
1197	0.388388	0.274316	0.138428	0	0.597076	0.161632	0.00983878	0.195376	0.0942612	0.0078581	0.556935	0.135395
1198	0.263833	0.10718	0.005462	0.0613251	0.272473	0.180143	0.00574894	0	0.0444245	0.0648057	0.0530918	0.0590964
1199	0.0795499	0.139416	0.174069	0	0.327447	0.176972	0.0216675	0.112164	0.346551	0	0.5032	0.0771538
1200	0	0.165542	0.169013	0.189437	0.278845	0.00206886	0.00652554	0	0.242489	0	0.0207134	0.154674
1201	0.206362	0	0.111196	0.0982448	0.310793	0	0	0	0	0.0315929	0	0
1202	0.650262	0.341205	0.157412	0.0274647	0.400817	0.188456	0	0.226025	0.264356	0.0303461	0.466309	0.209436
1203	0.487566	0.0707694	0.0983018	0	0.1621	0.249896	0.0194058	0.207842	0.285141	0.0264424	0.400971	0.130952
1204	0.869712	0.258013	0.111296	0.101066	0.205252	0.121857	0.0452947	0	0.0922816	0	0.451264	0.166972
1205	0.345691	0.216328	0.0198279	0.157974	0.188532	0	0	0	0.112059	0.0571402	0.103241	0.0811629
1206	0.521429	0.654496	0	0	0	0.00111761	0.043834	0.00159883	0	0	0.38188	0
1207	0	0.0891505	0.192895	0.120885	0.263356	0.105612	0.0257457	0	0.158015	0.0270625	0.0302794	0
1208	0.374467	0.174008	0.784493	0.0377216	0.139157	0.0970759	0.00991567	0	0.074371	0	0.193748	0.054937
1209	0.199058	0.590921	0.0315185	0.0262764	0	0.330333	0.0508799	0.138055	0.0505685	0.189207	0.0355365	0.0523851
1210	0.200306	0.425518	0.553855	0.0603139	0.15578	0.0857359	0	0.0971554	0.150428	0	0.271751	0.044598
1211	0.250161	0	0.0417341	0.0699486	0.279137	0	0	0.00187482	0.162501	0	0.426045	0.161208
1212	0.751253	0.174547	0.118658	0.0111198	0.0947062	0.275613	0.0785404	0.110094	0.178464	0.122009	0.0816149	0.185645
1213	0.264123	0	0.00791301	0.0149399	0.262011	0	0.00925636	0	0	0	0.10217	0
1214	0.534329	0.165465	0.246555	0.0990503	0.308378	0.103856	0	0	0.175847	0.042791	0.240352	0
1215	0.676352	0.359011	0.0222983	0	0.275893	0.286225	0	0.1401	0.113517	0.0218716	0.543644	0.179205
1216	0.113806	0.621745	0.229243	0.0864678	0.134595	0.106052	0	0.131396	0.224432	0.00557214	0.32609	0.0508611
1217	0.537503	0.35316	0.28709	0.00945833	0.0179312	0	0.000657378	0.00232975	0	0	0.176875	0
1218	0.296207	0.411671	0.169213	0.0142423	0.117427	0.0705972	0.043437	0.0786395	0.216689	0.000590764	0.0314864	0
1219	0.165707	0.112506	0	0.0709974	0.287869	0.003282	0.0478508	0	0	0.0609346	0.079315	0.120487
1220	0.512454	0.183283	0.0124129	0	0.000565734	0	0.192994	0.00040205	0.235158	0.05408	0.00425611	0
1221	0.678418	0.0997694	0.00314862	0.0335592	0.790788	0	0.0879156	0.250122	0	0.0257208	0.0147962	0.0808146
1222	0.323332	0.197691	0.166887	0.00442132	0.115933	0	0.0781567	0	0	0.00428336	0.0353873	0.000587425
1223	0.329416	0.263991	0.292749	0.0866512	0.191055	0.196408	0	0.20982	0.134513	0.00427373	0.336485	0
1224	0.560616	0	0.25572	0.000714774	0.066792	0.0774701	0.051514	0	0.343119	0.0323602	0.0327582	0
1225	0.0846587	0.499765	0.280137	0.0369511	0	0.0808592	0.005814	0.0867021	0.0450574	0.291343	0.0174602	0.0121651
1226	0.530907	0	0.13717	0.0743485	0.222609	0.120966	0	0.227506	0.00140757	0	0.351203	0.230148
1227	0.286263	1.07297	0.0312315	0.0363208	0.0849497	0.101639	0.0649513	0.127507	0.298801	0.096002	0.129233	0.127389
1228	0.14031	0	0.14351	0.0784149	0.4817	0.08523	0.0410397	0	0.00587699	0.00333692	0.0995715	0.089786
1229	0.441438	0	0	0	0.55266	0.00592474	0.0122361	0	0	0.0838621	0.0578843	0.105254
1230	0.283907	0	0.0416913	0.103586	0.199783	0.206858	0	0	0.253191	0.0269987	0.0861854	0
1231	0.327845	0.344238	0.0154328	0.0397516	0	0	0.131295	9.1787e-05	0.232995	0.0204806	0.00576921	0.0856293
1232	0.507948	0.255203	0	0	0.483794	0.271495	0.0315305	0.303415	0	0.0691031	0.467643	0
1233	0.525435	0	0	0.0388945	0.410087	0.163539	0.0100444	0.245397	0.237043	0.0111703	0.458217	0.172562
1234	0	0	0.187249	0	0	0.191042	0.0353017	0	0	0.0619743	0.0890633	0.0488906
1235	0	0	0.128147	0.167122	0	0.201663	0.00413715	0	0.0638312	0.0330103	0.147139	0.151639
1236	0.753999	0.336808	0.186674	0	0.401218	0.237334	0.00663913	0	0.18107	0	0.138706	0
1237	0.34822	0.463286	0.0198293	0.0658019	0	0.249563	0	0.235318	0.105744	0.193649	0.118187	0.0889709
1238	0.516981	0	0.11633	0.0241629	0	0.121487	0.0763655	0	0.290264	0.0595193	0	0
1239	0.324414	0.392605	0	0.0879983	0.0342935	0.0958435	0.0376699	0	0.0745623	0.0606625	0.0922945	0
1240	0	0.213099	0.0876083	0.00470532	0	0.308676	0.00495707	0.294117	0	0	0.290203	0.181004
1241	0.265598	0.377694	0.244368	0.0401504	0.110411	0.14888	0.00449345	0.0014284	0.122508	0.00299671	0.336027	0.0485471
1242	0.35721	0.276217	0.0257972	0.0536429	0.21135	0	0.0819443	0	0.150046	0.00659579	0.0111315	0
1243	0.220836	0.340573	0.704552	0.18009	0	0	0	0	0.193531	0	0.104001	0.101991
1244	0.621141	0.427456	0.104728	0.144284	0	0.229416	0.130282	0	0.204428	0.0504207	0.138419	0.115727
1245	0.19432	0	0	0.0106862	0.000742522	0	0.0553558	0	0.094087	0.00587267	0.0442799	0.053613
1246	0	0	0.290875	0	0	0.000917974	0.160774	0	0.40863	0.0348263	0.106822	0.145994
1247	0	0.1027	0	0.0363818	0.562206	0	0.0540119	0	0.170475	0.0587888	0	0
1248	0.45231	0	0.0285627	0.0514627	0	0.00172419	0	0.319351	0.352642	0.000504258	0.206082	0.224544
1249	0.585366	0.129057	0.164985	0.104428	0.0207346	0.084863	0.0721304	0	0	0	0.0036139	0.11524
1250	0.421593	0	0.875345	0.00411117	0	0.195407	0.0119182	0.245483	0.106651	0.293212	0	0.0809839
1251	0.552308	0.286632	0	0	0.433566	0.178457	0	0.116899	0.271897	0.0455441	0.441597	0.110453
1252	0.327062	0.282082	0.0683442	0.0607762	0.0829002	0.0952032	0.0495328	0.105899	0.140595	0.0336447	0.0464914	0.0723818
1253	0.298073	0.206547	0.134336	0	0	0.186848	0.101642	0	0.192678	0.0132624	0.368746	0
1254	0.901907	0.0297657	0.254127	0	0	0.00858477	0.0423791	0.259538	0.109695	0	0.467097	0
1255	0.269935	0.483015	0.453735	0.00241628	0	0.183752	0	0.113162	0.216466	0.266002	0.0766011	0.0336791
1256	0.215576	0.0909187	0.0124926	0.130217	0.440283	0.241546	0.00204247	0	0.197525	0.0101855	0.395098	0.156905
1257	0	0.468049	0	0.0238417	0	0.00153118	0.115935	0.311737	0.216736	0	0.355455	0
1258	0.528387	0.273656	0.0947319	0	0	0.0876735	0.225139	0.0975976	0.305558	0.00459618	0.0911821	0.240535
1259	0.512817	0.186206	0.0740537	0	0.46594	0.19495	0	0.305233	0.047216	0.0168838	0.539005	0.162596
1260	0.0908869	0.125618	0.0573106	0.0524513	0.340802	0.0884962	0.00848854	0	0.0960066	0.0272625	0.0301193	0.0801421
1261	0.567578	0.00651646	0.0467745	0.00678032	0	0.133309	0.0823492	0	0	0	0	0
1262	0.963524	0.289612	0.0759621	0	0	0.390567	0.0122174	0	0	0	0.0476904	0
1263	0	0.132601	0	0.00851521	0	0	0.236343	0	0.194862	0	0.0306877	0.144486
1264	0.557047	0	0.306113	0.243412	0.201102	0.12861	0.00949785	0.129802	0	0.00445382	0.175454	0
1265	0.163619	0.22586	0.248971	0.175637	0	0	0	0	0.0452143	0.0139891	0	0.0701246
1266	0.413735	0.451064	0.0256918	0.0160993	0.191093	0.0803632	0.0981909	0	0.169741	0.0391235	0.0324472	0.236804
1267	0.417307	0.104541	0.889519	0.123645	0.188322	0.141644	0.030698	0.247122	0.124051	0.110513	0	0.120385
1268	0.385633	0.193473	0.345212	0.0202126	0	0.21951	0.0365086	3.05154e-05	0.274536	0.0211355	0.0142757	0.0393794
1269	0.251051	0.40851	0.0253399	0.0582818	0	0.00208404	0.0167161	0	0.264709	0.0191518	0.00952534	0.114916
1270	0.452579	0.245774	0.159666	0.0105814	0.20519	0.0628522	0	0.224038	0.218282	0	0.300907	0.100973
1271	0.183201	0.15326	0.0320179	0.00739557	0.0970958	0.221891	0.142809	0	0.297232	0.028565	0.029751	0.0725583
1272	0	0.356063	0.0543435	0.00958786	0.595367	0.316685	0	0	0	0	0.0919586	0
1273	0.30779	0.232296	0.153795	0.0225502	0.218725	0.0797462	0.124577	0	0.250605	0.0779984	0	0.169968
1274	0.106382	0.358964	0.0231099	0.0702032	0.331187	0.116912	0.0048684	0	0.106979	0	0.333939	0.169254
1275	0.181754	0	0	0.313733	0	0	0.0266318	0	0.146653	0.0163019	0	0
1276	0.269044	0.419531	0.147542	0.0512824	0.139649	0.153992	0.143206	0.10459	0.148766	0.0315643	0.00646401	0
1277	0	0	0	0	0	0	0	0	0	0.066103	0.186226	0.126536
1278	0	0	0	0.130617	0.314453	0.00295183	0.00821756	0	0.0672561	0.0796367	0.00232757	0.0668139
1279	0.222342	0.527022	0.544302	0.00279473	0.191787	0	0.0178162	0	0.124528	0	0	0
1280	0.149888	0.0710226	0.222644	0	0.440954	0.140662	0.0389023	0.190374	0.252984	0	0.37272	0
1281	0.801459	0.465334	0	0	0.651309	0.161994	0	0.164146	0.286745	0.0473172	0.569511	0
1282	0.569419	0.359396	0.00784149	0.0407415	0	0	0.0886221	0	0.478047	0.0329798	0.067107	0.247471
1283	0.110993	0.272349	0.0837051	0	0	0.0747273	0.068135	0.0861349	0.0106521	0.0370174	0.0412084	0.166412
1284	0.545814	0.271706	0.158394	0.132775	0.00255642	0.000593318	0.0356826	0.234514	0.0818548	0	0.165949	0.17183
1285	0.299015	0.720924	0.155068	0.0308102	0.072517	0.154037	0.00240572	0.000241659	0.298639	0.217143	0.0568607	0.0851779
1286	0.311655	0.284395	0	0.0908086	0	0.238296	0.077303	0	0.288849	0.0257552	0.0427649	0.0713463
1287	0.433722	0.217393	0.052358	0.153546	0	0	0.0256668	0	0.156482	0	0.180633	0.109025
1288	0.17868	0.733277	0.0240505	0.0680388	0	0.121855	0.153783	0.10642	0.111948	0.0067957	0	0.0649687
1289	0.428245	0.153461	0.0825999	0.028449	0.0924995	0.198893	0.0832431	0.0951141	0.163233	0.0430549	0.0767464	0.163304
1290	0.233879	0.117231	0.482632	0.0148416	0.248373	0.260149	0.0408682	0.10973	0.196285	0	0.247796	0.11071
1291	0	0.144998	0.249078	0.0528104	0	0.130818	0	0.000482514	0.205598	0	0.0292675	0.0717012
1292	0.159147	0.302554	0.0965977	0.0234543	0	0.00149462	0.00124815	0	0	0.0280691	0.0979051	0
1293	0.287096	0.186534	0.0361672	0	0.162549	0	0.0147014	0.0865232	0.0961553	0.0516149	0.684313	0.107586
1294	0.407187	0	0	0	0.419992	0.0744717	0	0.273073	0.330964	0.0771477	0.360706	0.231509
1295	0	0.258878	0.200587	0.0446451	0	0.131947	0.0563461	0	0	0.0730011	0	0
1296	0.270425	0.310762	0.205608	0.132684	0.0272803	0.000915685	0.0254395	0	0.189079	0.00890695	0	0.0467847
1297	0.341136	0.185383	0.0166915	0.0953443	0.501387	0.234793	0.092247	0	0.151401	0	0	0.129995
1298	0.340845	0.46252	0.0308122	0.0400845	0.267687	0.138662	0.0673856	0.151776	0.298272	0.00967851	0	0.101319
1299	0.630188	0.793164	0.127133	0	0	0.37182	0.0714509	0	0.438416	0.0481711	0.0854831	0.417413
1300	0.165741	0.71065	0.178883	0	0	0	0.144448	0.181792	0	0.0864422	0.0385827	0.116032
1301	0.259	0.270793	0	0	0.500514	0.303619	0.0117575	0.355934	0.332287	0.0940445	0.350627	0.109133
1302	0.335708	0.177096	0.00582414	0	0.314877	0	0.0429349	0.103608	0	0	0.131357	0
1303	0.443201	0	0.0507564	0.0349326	0	0.0926786	0.119683	0	0.425787	0.0404106	0.0443828	0.0653694
1304	0.283825	0.45158	0.183945	0.0433067	0.264099	0.100635	0.0255928	0.114039	0.167445	0.0526475	0	0.187656
1305	0.231108	0.340685	0.0352571	0.104852	0.0262024	0	0	0.131339	0.353297	0	0.331232	0.157747
1306	0.739773	0	0.0466365	0	0	0.00883651	0	0	0.254531	0.0532909	0.137246	0
1307	0.27506	0	0	0.022366	0	0	0	0	0	0.0602337	0.166473	0
1308	0.291036	0.338232	0.238597	0.0371059	0.48469	0.154076	0.0735761	0	0.183778	0.000842122	0	0.141567
1309	0.212545	0.74467	0.389852	0.0117978	0	0.17604	0.100594	0.324117	0.200427	0.172763	0.00968611	0.155113
1310	0.166773	0.649332	0.0597581	0	0.191127	0.104386	0.104179	0	0.133769	0.0288527	0.041667	0.047075
1311	0.288738	0.0364312	0.114541	0.0904978	0.254306	0.153393	0.0372319	0.000526917	0.271126	0.0432972	0	0.182534
1312	0.499754	0.683035	0.533107	0.0550252	0.236084	0.175635	0	0	0.447638	0.329286	0	0.201707
1313	0.509058	0.283971	0.0946069	0.00751874	0.349196	0.0791437	0.0877095	0.0791844	0.257983	0.011952	0.00664514	0
1314	0.649883	0.111708	0.0610986	0.0255576	0.137953	0.112534	0.0150634	0.0575064	0.0526563	0	0.432254	0.20686
1315	0.778208	0.250683	0.0574764	0	0.371899	0.0911469	0	0.244168	0.112548	0.0600452	0.476877	0.187457
1316	0.688653	0.283493	0.140997	0.000615331	0.223164	0.15909	0	0.212882	0.216341	0.0530727	0.468168	0.11681
1317	0.975836	0.112806	0.125801	0.0178809	0.174483	0	0	0	0.24976	0.0932337	0.361402	0.130957
1318	0.0638405	0.221433	0.103278	0.281173	0.148961	0	0	0	0.0594792	0.00767125	0	0
1319	0	0	0.704466	0.398013	0	0	0.0103642	0	0	0.003117	0	0.0437169
1320	0.377321	0	0.518003	0.0261671	0	0.336119	0.0895791	0.000477744	0.27386	0.0431811	0.156775	0.143356
1321	0.264309	0.858711	0	0.000351299	0	0	0	0.385636	0.0659517	0.20203	0	0
1322	0.577581	0	0.234213	0.0998528	0	0.161948	0.0486375	0	0	0	0.271412	0.0962686
1323	0.171727	0.605899	0.68475	0.0102602	0	0.120893	0.0187509	0.153751	0	0.136859	0.0162906	0.0409156
1324	0.213633	0.474621	0.559538	0	0.277506	0.0890814	0.0435395	0	0.0930278	0.142335	0.0759768	0.0940087
1325	0.149342	0.238753	0.226461	0.0142649	0.104837	0.0980804	0	0.177266	0.151633	0	0.278446	0.13379
1326	0.519239	0.410956	0.473437	0.0398176	0.215758	0.148973	0.0204017	0	0.228742	0.0441256	0	0.115374
1327	0.0665173	0.0923383	0	0.0269476	0.100257	0	0.011308	0	0.0841689	0	0.0715517	0
1328	0.108188	0.287753	0.0522962	0	0.222298	0.108678	0.0253516	0.193344	0.125242	0.0740513	0.248143	0.0278521
1329	0.579604	0.470138	0.330495	0.0231008	0.267504	0	0.0969695	0.154754	0.0760925	0.0513305	0.090673	0.0922415
1330	0.712932	0	0.0271517	0.0998385	0.262427	0.132113	0.047392	0	0	0	0.326105	0.134568
1331	0.174898	0	0.0167989	0.194702	0.323138	0.164017	0.0590674	0	0.0688072	0.0109448	0	0.0679791
1332	0.0736735	0.0798416	0.0370291	0.0759232	0	0	0	0.0596757	0	0.0119759	0	0
1333	0.478381	1.00549	0	0.0363876	0.111034	0.142875	0.145365	0	0	0	0	0.181278
1334	0.750107	0.188817	0.227269	0	0.48469	0.155761	0	0.00327953	0	0	0.523517	0.201904
1335	0.39914	0.106051	0.0457027	0.0363951	0.518254	0.156847	0	0.164364	0.13951	0.0130826	0.0268312	0
1336	0.395668	0	0	0.0188936	0	0.192907	0.0798374	0	0	0.0608605	0.193087	0
1337	0.521936	0.501509	0.305344	0.0431028	0.124973	0.101865	0.0761009	0	0.141503	0	0	0.0670531
1338	0.167549	0.26833	0.0395803	0.0231345	0	0.000129588	0.0198112	0	0.238072	0.028729	0.0255773	0.0795249
1339	0.570276	0.390385	0.264071	0.0334958	0	0	0.0580371	0.284506	0.410485	0.00883131	0.0780602	0.153755
1340	0.459455	0.206594	0	0	0	0.121549	0.0222617	0.292412	0.115329	0.00426553	0.429107	0.195445
1341	0	0.0974407	0.141201	0.0475538	0.248142	0.333231	0.00123731	0.101317	0.17431	0.00717787	0	0
1342	0.229156	0.459523	0	0.0177431	0.283391	0	0	0.239891	0	0	0.266338	0.184825
1343	0	0.0580357	0.24741	0.134458	0.13375	0	0	0.0858186	0	0.038404	0.00730465	0
1344	0.391591	0.500123	0.159528	0	0.169666	0.108609	0.227595	0	0.239679	0	0	0.222157
1345	0.364185	0.453828	0.215847	0	0.317446	0.172988	0.0148355	0.000494535	0.0274491	0.085156	0.499391	0.0792165
1346	0	0.327942	0.0341307	0	0	0.000870272	0.00493677	0	0	0	0.00793649	0
1347	0.178923	0.0427901	0.0937024	0.106301	0.350098	0.159276	0.00200771	0.316432	0.179303	0.0408872	0.438071	0.160277
1348	0.236411	0.135984	0.189269	0.0138287	0.305184	0.1436	0.0115911	0.0995102	0.238092	0	0.604811	0
1349	0.375644	0.245936	0.0810874	0	0.402919	0.110836	0.0145713	0.155953	0.0494822	0	0.209689	0.162366
1350	0.381796	0	0	0.0125088	0.45825	0.167841	0.0610222	0.10192	0.276846	0	0	0.120301
1351	0	0.304026	0.367014	0.0402513	0.331436	0	0.115413	0	0.0784477	0.0956163	0.0116594	0.191832
1352	0.321083	0.269424	0.156364	0.089906	0.0799586	0	0.06578	0.148505	0.166148	0.0447804	0	0.109487
1353	0.180999	0	0.0116349	0.0556585	0	0	0.044965	0	0	0	0.00709107	0
1354	0.171394	0	0	0.0800731	0.256525	0.195801	0	0	0	0.0388974	0.0475762	0
1355	0	0	0	0.115149	0.352916	0	0	0	0.246133	0.0952376	0.261853	0
1356	0.151052	0	0	0.111344	0.0690605	0	0.108615	0	0	0.0848539	0.230928	0
1357	0.533568	0.229038	0	0.0542499	0	0	0.00230359	0	0.114877	0	0.00691995	0.205156
1358	0.516309	0.37765	0.234876	0.00443405	0.195597	0	0.0932887	0	0.132213	0	0.0167766	0.189165
1359	0.520959	0.302856	0.579027	0.0780028	0	0.269955	0	0.139496	0.259565	0.0986507	0.0119033	0.0588564
1360	0.245969	0.399315	0.212078	0.0824536	0.0934417	0.199739	0.00642428	0.0943029	0.191322	0.0824099	0.0491553	0.0827293
1361	0.461481	0	0.024948	0.0155159	0.448042	0.162522	0	9.68499e-05	0.215827	0.0124982	0.394354	0
1362	0.096728	0.235263	0.217823	0.0707232	0.0955717	0.0761839	0	0	0.195084	0.00861839	0.279362	0.0756924
1363	0.156394	0	0.412217	0.0636691	0.398347	0	0.0604576	0.14749	0.130953	0.00646366	0.0879806	0.0783271
1364	0.215821	0.0461315	0.0321478	0.0833812	0.591858	0.247952	0.0105425	0	0.120501	0.0426331	0.0995982	0.0965861
1365	0.285136	0.121876	0.423116	0.116578	0.310191	0	0.0408034	0	0.20745	0	0	0.0884473
1366	0.324066	0.389586	0.131659	0	0	0.132185	0.0779867	0	0	0	0.0229988	0.146084
1367	0.447442	0.234446	0.188853	0.00216175	0.166212	0.192379	0	0.260187	0.108252	0	0.403334	0.170627
1368	0.392006	0.532333	0.219851	0	0.127933	0.288348	0.0329733	0.0764661	0.202994	0.133078	0.0553124	0.0246203
1369	0.39907	0.419733	0.440096	0.00590828	0.149803	0.147585	0.0424088	0.176358	0.0238396	0.192768	0	0.0589527
1370	0.24021	0.673759	0.240894	0.0985789	0.214827	0	0.0719753	0.0011802	0.124194	0.00684984	0.048066	0
1371	0.146845	0.15604	0.459189	0	0.246618	0.160486	0.0699184	0	0	0	0.246963	0.0727469
1372	0	0.538975	0.0628529	0.0376343	0.0124189	0.000416932	0.0400305	0.189555	0.144568	0.00910264	0.257476	0.0759828
1373	0	0	0.0283201	0.221071	0	0.00118904	0	0	0.0169747	0.0140318	0.380748	0.0628663
1374	0.468109	0.666992	0.264526	0.0282474	0	0.0849128	0.0897405	0	0.193699	0.0257524	0.00633564	0.0920535
1375	0.198703	0	0.362966	0.018282	0	0.146389	0.237715	0.0990156	0.237976	0.0266031	0	0.102234
1376	0.335936	0.620553	0.0768714	0	0	0.281494	0	0.00209576	0.231583	0.305981	0.0291963	0.162703
1377	0.307621	0.375153	0.00675392	0	0.331442	0.252651	0	0.00127033	0.222533	0	0.415635	0.219217
1378	0.278913	0.372657	0.501906	0.0726538	0.252653	0.111189	0	0.275352	0.180132	0	0.321825	0.0408699
1379	0.191505	0.156816	0	0.00309175	0.0907719	0.111722	0.0396942	0.0946729	0.133727	0.0315552	0.0469735	0.105547
1380	0.351538	0	0.256211	0.00232918	0	0.135874	0.0111475	0.00129841	0.0547655	0.202485	0.0142708	0.140161
1381	0.781188	0.313251	0	0.026671	0.367956	0.116608	0.0988843	0.256871	0.0582154	0.032162	0.258268	0.199792
1382	0	0	0	0	0	0.356919	0	0	0.271516	0.0298111	0.295774	0
1383	0	0	0.227861	0	0.0115279	2.67431e-05	0.0329582	0	0	0.0443235	0.0432696	0.148348
1384	0.639402	0	0.231349	0	0.284632	0.320732	0.0362372	0.17022	0.109032	0.0088756	0.35554	0
1385	0.926579	0.708637	0.314622	0	0.0998646	0.288248	0.0750503	0.0017249	0.258197	0.0792837	0.0614517	0.0839686
1386	0.458906	0.395854	0.0415515	0.0787262	0.0847613	0.195571	0.0381331	0.138803	0.252382	0.0662686	0.114249	0.0722404
1387	0.158541	0.254495	0.25289	0.200182	0	0	0	0	0	0.0332911	0	0.0728652
1388	0	0	0	0.400567	0.195968	0.10725	0.0197082	0	0	0.019586	0	0.0218053
1389	0.0731265	0.0794925	0.0647181	0.040882	0.260916	0	0.000358215	0.109338	0.0732417	0	0.563811	0
1390	0.0821205	0.497575	0.0132731	0.0459523	0.0743186	0.0906683	0.0475616	0	0.246085	0.0610628	0.0647611	0.105176
1391	0.573232	0	0.125551	0.00270362	0.533363	0	0.0328158	0	0.112553	0.0653877	0.379794	0.304864
1392	0.370676	0.414843	0.138705	0.00535279	0.139887	0	0.115926	0.00130533	0.25841	0	0.0178232	0.126723
1393	0.336598	0	0.120163	0.101883	0.465674	0.089511	0	0	0.0874232	0	0.0721469	0.246378
1394	0.413473	0.227718	0.167729	0.0495143	0.191585	0	0.162158	0	0	0	0.00777472	0.130857
1395	0.193984	0	0	0.0766199	0.0189749	0.130783	0.131618	0	0.153278	0.0165976	0.00705167	0
1396	0.502482	0.157137	0	0.0530988	0.00377659	0.104836	0.14331	0	0	0.000687198	0.0451222	0.193801
1397	0.339488	0.145178	1.18193	0.0874852	0.0673734	0.208904	0	0.0861974	0.137703	0.284945	0	0.0532555
1398	0.274396	0.00745957	0.218669	0.0395349	0.33237	0	0.083318	0	0.247905	0.0546054	0	0
1399	0.0419484	0.532082	0.515382	0	0.144037	0.0931677	0	0.19233	0.223461	0.0369092	0.419026	0.0395462
1400	0.616413	0	0	0.00772931	0	0.455449	0.0055433	0.000178094	0	0	0.0929601	0
1401	0.533161	0	0.088824	0	0.231305	0.160335	0.0263782	0.174021	0.217894	0	0.606816	0.169256
1402	0.186384	0.40124	0.0353812	0.106107	0.0989991	0.0910202	0.0964716	0.0979392	0.333011	0.00167583	0.000689172	0.0570264
1403	0.634518	0.365599	0	0.0396689	0.182291	0.0963391	0.111248	0	0.0954604	0.0711877	0.0699367	0
1404	0.580163	0.224556	0	0	0.525822	0	0.0360595	0.201468	0.0228684	0.0160113	0.454879	0.189945
1405	0.307853	0.201147	0.104087	0	0.170936	0.0672679	0.0404802	0.0724114	0.0576395	0.033748	0.00512359	0.04572
1406	0.476876	0.214325	0.308841	0.0244313	0.00821236	0.216981	0.00582192	0.176339	0.157872	0.000121749	0.365757	0.156995
1407	0.162668	0.194133	0.0464961	0	0.362514	0	0.0250554	0.195854	0.124529	0	0.217876	0
1408	0.349563	0.589766	0.242208	0.074155	0.0860158	0.156305	0.128269	0	0.159522	0.0266739	0	0
1409	0.198479	0	0.249974	0.0558193	0.182316	0.184014	0.000727442	0	0.145876	0.0179182	0	0.0934469
1410	0.310349	0.14714	0.0354376	0	0.134565	0.324958	0.141426	0	0.170357	0.0566136	0.572384	0.0639757
1411	0.434778	0.0266907	0.0121478	0.0302559	0.271216	0.256835	0	0.297909	0.119173	0.0484679	0.512609	0.245301
1412	0	0	0.426574	0.025322	0	0.134022	0.106966	0	0.0894308	0.00518453	0	0
1413	0.296578	0.413049	0.101062	0	0	0.159004	0.170261	0.113394	0.261038	0.0274873	0.00685382	0.0776649
1414	0	0	0.0233946	0.0793163	0	0	0	0.00135646	0	0.0733029	0	0
1415	0	0	0.359352	0.0267419	0.462102	0	0.105687	0.203484	0	0.0758164	0	0
1416	0.195461	0.191858	0.297557	0.0443921	0.164736	0.11484	0	0.0802516	0.236671	0.00178174	0.329205	0.0552626
1417	0.307138	0.706385	0.055791	0.0282563	0	0.140808	0	0.144674	0.1783	0.13923	0.0829422	0
1418	0	0.241496	0.0662133	0.100133	0.248061	0	0.0629955	0.107198	0.345605	0	0	0.0719782
1419	0.546314	0.188136	0.0522993	0.0120504	0.482331	0.0712505	0	0	0.19139	0.050372	0.470388	0.166733
1420	0	0.437054	0.451267	0.0792621	0.298608	0	0.0742262	0	0.113083	0.00730827	0	0.000370003
1421	0.219423	0.255438	0.451109	0.0420271	0	0.0813824	0.0875694	0	0.348465	0.0262056	0	0.0894185
1422	0.262967	0	0.124597	0.0105069	0.00476112	0	0.0981715	0.0662512	0.0859321	0	0.00850907	0.00228029
1423	0.475848	0.373028	0.00559683	0.0113383	0.141998	0	0.158462	0	0.210537	0.0161492	0.0675703	0.27801
1424	0.279824	0.04906	0.0891639	0.0930155	0.403654	0.182029	0.0440042	0	0.210246	0.0242502	0.0781403	0
1425	0.607188	0.0703098	0.0994624	0.0413114	0	0.269073	0	0	0.0841922	0.0271441	0.277457	0.121812
1426	0.000267488	0.262913	0.611345	0.285607	0	0	0.0518232	0.113632	0	0.00400325	0	0.0498549
1427	0.163609	0.3935	0.00888116	0	0	0.166399	0.0303881	0.000432853	0.0594262	0	0.232332	0.121268
1428	0.451923	0	0.0762784	0.0282081	0	0.184732	0.00826506	0.00182187	0.106137	0.147315	0.0238083	0.125009
1429	0.150406	0.426358	0.0210373	0.0477368	0.105055	0.140225	0.0635532	0.000379278	0.133824	0.0308977	0.0114901	0.0609309
1430	0.157941	0.211146	0.0213995	0.119516	0.241481	0.197388	0	0.000587352	0.115124	0.0094809	0.207801	0.121344
1431	0.0392991	0.136157	0	0.0307503	0.189496	0.111661	0	0	0.222408	0.0184624	0.489634	0.0809337
1432	0.290884	0.432719	0.530626	0.00997531	0.183761	0.17445	0.0392961	0.00106272	0.127564	0.26523	0	0.0262402
1433	0.269539	0.100598	0	0.125302	0.227085	0.101667	0	0.0963885	0.199491	0.0129637	0.112703	0
1434	0	0	0.503833	0	0	0	0	0.00110619	0	0	0.0732062	0.136777
1435	0	0	0.166724	0.100478	0.138435	0.153358	0.0130681	0.107293	0.220243	0.00108549	0.177594	0.0855866
1436	0.346514	0.51905	0.354497	0.07448	0.164973	0.00135603	0.00447085	0	0.139098	0	0	0
1437	0.0681611	0.0686098	0	0.0963072	0	0	0.0665957	0	0	0.044204	0	0.0346263
1438	0	0.401508	0.315851	0.0227106	0.287276	0	0.135071	0.159016	0	0.00322869	0.144189	0.112536
1439	0	0	0.0166545	0	0	0.00617505	0.0160362	0	0.216164	0.0040312	0.241405	0.116851
1440	0.19449	0.296162	0.312545	0.0751184	0.646878	0.00285801	0	0	0.0797037	0	0.0211666	0.123666
1441	0.314592	0.207208	0.048137	0.0655391	0.462089	0.000122963	0	0	0.113856	0	0.0337042	0.056658
1442	0.0824601	0.591943	0.052575	0.0913096	0	0.135716	0.0305505	0	0.104869	0.00251221	0	0.0651482
1443	0	0	0.164861	0.013467	0.108592	0.0777497	0.00971738	0.0554113	0	0	0.0274084	0.0709445
1444	0.323289	0.324349	0	0.09708	0.219206	0	0.0470897	0	0.306042	0	0.0134999	0.171349
1445	0.337639	0.527111	0.331655	0	0.164306	0.393727	0	0.00180439	0.261315	0.103169	0.00457708	0.0866638
1446	0.169917	0.289602	0.0397254	0.0377007	0	0	0.0375721	0.000298636	0.119745	0.0135203	0	0.0802385
1447	0.494079	0.116665	0.160411	0	0.526025	0	0.0345689	0.214815	0.22243	0.0161941	0.479361	0
1448	0.695591	0.934522	0.209449	0.0205125	0	0.161054	0.0684127	0.183546	0.13066	0.104815	0.157429	0.108733
1449	0.162974	0.201058	0.376752	0.107024	0.0601113	0.208671	0	0.0956019	0	0.203751	0.0253876	0.0519551
1450	0.162529	0.113591	0.0016542	0.00778658	0.32817	0.0831216	0.104378	0	0.312363	0.0252055	0.0174631	0.0486761
1451	0.223875	0.295243	0	0.0237032	0.154893	3.98456e-05	0.0414804	9.26162e-05	0.125363	0.00434031	0.02343	0.0338759
1452	0.526825	0.0863015	0.0249919	0	0.483719	0	0.00621819	0.102601	0.187142	0.0680293	0.403198	0.131224
1453	0.501077	0.328813	0.139524	0	0.443864	0.216117	0	0.27563	0.256882	0	0.309112	0.126542
1454	0.485195	0.946339	0.464559	0.000966377	0.074049	0.144711	0.0246462	0.172817	0.477745	0.229553	0.0605727	0
1455	0.181962	0	0	0.18457	0.264537	0.00086714	0.117383	0	0	0	0	0.0888833
1456	0.357409	0	0.543644	0.0365545	0.41405	0.17162	0.0429551	0.0810397	0.051449	0.0346727	0.309758	0.129379
1457	0.317517	0.547559	0.0743154	0.0722898	0	0	0.140866	0	0.2181	0	0	0.120853
1458	0.167702	0.189612	0.81302	0.0315094	0.187708	0.132721	0.0851304	0.165322	0.0674773	0.274436	0	0.0292082
1459	0.00771256	0.368062	0.275539	0.0770993	0	0.116935	0.0376991	0	0.0149678	0.00844028	0.0668301	0.19973
1460	0.273127	0	0.17255	0.011709	0	0.096477	0.0610228	0	0.213495	0	0.0197816	0.19729
1461	0	0.0776403	0.0573539	0.0294286	0.013404	0	0.0429012	0.000972023	0.147031	0	0.040032	0.0604715
1462	0.401442	0.0886415	0.192232	0.0189356	0.381583	0.081448	0.0545263	0	0.174388	0.0244308	0.0580564	0.0411231
1463	0.220727	0.29297	0.0493965	0.0579514	0.272616	0.123868	0	0.000179964	0	0.0203884	0.0597992	0.0921002
1464	0.0953173	0.218065	0.0367947	0	0.226462	0.0569243	0.0447838	0.0613006	0	0.00329766	0.219493	0.028763
1465	0.384613	0.255008	0.313753	0.056861	0	0.258498	0	0.00106933	0.212121	0.186298	0.0802771	0.0311177
1466	0.24594	0.603376	0.32766	0.125842	0	0	0.0039851	0	0	0.0282349	0.0145268	0.0683284
1467	0.609625	0.0833563	0.0953452	0.0377904	0.292671	0.225435	0	0.305936	0.137252	0.0673976	0.423588	0.217641
1468	0.0879767	0.115408	0.132767	0.262367	0.15518	0	0	0	0.154957	0.00905415	0	0.0535693
1469	0.518267	0.693071	0.113811	0.0455881	0	0.197726	0	0.221998	0.157666	0.203879	0.0358101	0.0617488
1470	0.349899	0.180594	0.0250969	0.032979	0.451917	0.156383	0	0	0.127534	0.0460483	0.348015	0.120333
1471	0.343693	0.361719	0.359776	0	0.319164	0.341479	0.0440563	0.149327	0.147693	0.140385	0	0.070558
1472	0.313359	0.21556	0	0.0104328	0	0.144018	0	0.120616	0	0	0.00907202	0.0907977
1473	0.07607	0.317458	0.232189	0.00593755	0.151198	0.121239	0.0672734	0.132148	0.071422	0.114014	0.036038	0.0561918
1474	0.338688	0.370676	0.204083	0.052563	0	0.114099	0.0996957	0	0.244283	0.0209885	0.0259992	0.0706317
1475	0.463564	0.261358	0.116733	0.00405034	0.371751	0.0646619	0.00519465	0.0671509	0.218061	0	0.459264	0.183527
1476	0.0529673	0.897022	0.453544	0.0652028	0.16958	0.140092	0.00590394	0	0.142092	0.0216637	0	0
1477	0.233101	0.512056	0.241166	0.0424143	0.249484	0.137551	0.0268804	0.00143691	0.251451	0.00967078	0.00546378	0
1478	0.390201	0	0.0794661	0.0515894	0.178059	0.0993381	0.137998	0	0.202814	0	0.00302183	0.216543
1479	0.101408	0.407512	0.41619	0.0771196	0	0.000595598	0.0716215	0	0.108908	0.0302481	0	0.0559061
1480	0.545053	0.217832	0	0	0.475074	0.110847	0.119165	0	0.345491	0	0	0.146806
1481	0.755567	0.303669	0.0539042	0.0898269	0.341177	0.200839	0.0631143	0	0	0.0330146	0.27977	0
1482	0.685631	0.265662	0	0	0	0	0.0626169	0.198061	0.103055	0.071167	0.562757	0.10497
1483	0.187147	0.380505	0	0	0	0.00403772	0.185937	0	0.166987	0.0524571	0.238339	0.112498
1484	0.406319	0.457225	0	0.000430501	0	0	0.214953	0	0.318489	0.0131998	0.0360087	0.223888
1485	0.462584	0.098531	0.0130509	0.059828	0.0111117	0.172493	0.0157348	0.271962	0.285003	0.0101847	0.371218	0.127153
1486	0.526853	0.00979468	0.199997	0.00931091	0.149387	0	0.0299396	0.000534719	0.340957	0.0140756	0.0245688	0
1487	0.425808	0.674134	0.179486	0.0546625	0.216961	0	0.0521872	0	0	0	0.0144672	0.145279
1488	0.32664	0.223191	0.652506	0.0511188	0.22922	0.147498	0.00742234	0.179366	0.209433	0.0210649	0.269085	0
1489	0.253573	0.109025	0.136976	0.0139914	0	0.161302	0.147396	0	0	0.0230808	0.518735	0
1490	0.412178	0.587926	0.09253	0.0754335	0.00506032	0.141492	0	0.000614702	0.200978	0.0192595	0.295232	0.121251
1491	0.300963	0.00297477	0.0259496	0.0365479	0	0.101945	0.187042	0.117545	0.201052	0.0218432	0.0357897	0.0718051
1492	0.867669	0.488239	0.139067	0.0123687	0	0.143628	0.128795	0	0.155563	0.031401	0	0.25738
1493	0.597784	0.105018	0.072218	0	0.226424	0.250105	0.0118357	0.232339	0.164764	0.00638946	0.288406	0.18275
1494	0.410265	0.324638	0.0835815	0	0.439904	0.12865	0.0313684	0.0826466	0.312072	0.0145397	0.400024	0.128083
1495	0.246559	0.244758	0.0973637	0.116764	0	0.081633	0	0	0.209084	0.0436788	0	0.0417612
1496	0	0.253682	0.0464357	0.108702	0.0698338	0.11508	0	0	0.185755	0.00512826	0.0970901	0
1497	0.195351	0	0.114034	0.0349756	0.223442	0.161258	0.0929424	0	0.196632	0.0132158	0.0623356	0
1498	0.597693	0.23272	0.0191406	0.0114882	0	0.211469	0.0142048	0.531957	0.263781	0.261311	0.0389351	0.0843661
1499	0.793671	0.251343	0.199144	0	0.365751	0.173787	0.0346624	0.332328	0.28973	0.0286984	0.33611	0.0671576
1500	0.924077	0	0	0	0	0.543324	0	0	0.181241	0.22947	0	0.28396
1501	0.516086	0.174354	0.0930303	0	0.233347	0.104296	0.00610126	0.000746234	0.191176	0.0230921	0.13324	0.203419
1502	0.302929	0.199285	0	0.0664947	0.412257	0.14942	0	0	0.0619295	0.0493301	0.152258	0.102289
1503	0.26804	0	0.0674156	0.0633143	0.380899	0.218091	0	0	0.234271	0.0220465	0.0268577	0.0644387
1504	0.649862	0.33593	0.0834918	0	0.284521	0.260415	0.00424816	0.241673	0.151976	0.0204082	0.340086	0.137518
1505	0.417858	0	0.160699	0.0825188	0	0	0	0.000376469	0.0789315	0	0.0963749	0.178848
1506	0.464913	0.119757	0.267685	0	0.369617	0	0.00498343	0.000323234	0.319099	0	0.31384	0.141286
1507	0.574023	0.429945	0.0978597	0.111666	0.538872	0	0.0141591	0.000285777	0.125661	0.00608567	0.125849	0
1508	0.42681	0.4479	0.00886251	0	0.171975	0	0.0851182	0	0	0.00869075	0.0710157	0
1509	0	0	0.020063	0.126212	0	0	0	0	0	0.127382	0	0.111555
1510	0.404158	0.213076	0.148047	0.0457241	0	0.11536	0.0848045	0.206088	0.192942	0.110042	0.0199911	0.251533
1511	0.234118	0.271432	0.0615447	0.0782742	0.374738	0.1999	0	0	0.0703408	0.0165055	0	0.097106
1512	0.168849	0.449761	0.0877081	0.0676989	0.180582	0	0.0327505	0	0.208877	0.244299	0	0.0327716
1513	0.379863	0.321165	0.157462	0.0242803	0	0	0.0158159	0.116159	0.230514	0.0503075	0	0.100648
1514	0	0.00456717	0.00513028	0.0310555	0	0	0.0175954	0.057867	0	0.0202169	0	0.0459089
1515	0.450182	0.398077	0	0.0772642	0.191928	0.427628	0	0.185362	0.136222	0.277502	0.0590616	0
1516	0	0	0.0888794	0.00610331	0	0.320678	0.0147453	0.195934	0.229074	0.0392534	0.3516	0
1517	0	0.305341	0.0720832	0.179778	0.279199	0	0.028378	0	0.183006	0.0100508	0.0598805	0.149252
1518	0.231133	0	0.464067	0.00414365	0.212201	0.120935	0.0953058	0.00152755	0.207972	0.0519016	0.0213988	0
1519	0.454889	0.262734	0.143879	0	0.438415	0.189168	0.00057023	0.000923108	0.203899	0	0.392367	0.172808
1520	0.125113	0	0.60115	0.274964	0	0	0.0454196	0.147662	0	0.0729889	0.163029	0.177718
1521	0.00912103	0.000577264	1.03038	0.129503	0	0	0.00239382	0	0.159748	0	0	0
1522	0.434974	0.122071	0	0.0247174	0.199582	0.114134	0.0506356	0.106311	0.273383	0.0429818	0.247473	0.0803867
1523	0	0	0.419021	0.0886461	0	0.000926655	0.00957479	0.224544	0	0.0211017	0.0820866	0.104321
1524	0.402829	0.269904	0.0218617	0.022823	0	0	0.0561798	0	0.249934	0	0	0.0988483
1525	0.256835	0	0.154308	0.09452	0.221961	0	0	0.000176113	0.206362	0.0107195	0.0369273	0.158967
1526	0.19875	0.376548	0.0612523	0.0876944	0	0	0.125998	0.188718	0	0.010203	0.011284	0
1527	0	0.348291	0	0.0419846	0	0	0.0011861	0.366294	0	0	0.180262	0
1528	0.618787	0.178744	0.122725	0.00640217	0	0.215586	0.162032	2.67168e-05	0.249356	0	0.000644103	0
1529	0.216584	0.416368	0.0606919	0.122517	0	0.230174	0.0712928	2.27649e-05	0	0.0113417	0.0135801	0
1530	0	0	0.297794	0.0116706	0.121965	0	0.0182655	0.00108295	0.00221747	0.0407261	0.0680435	0
1531	0.15583	0	0.0244592	0.0315184	0	0.000241622	0.158266	0	0.388103	0.0156095	0	0.187638
1532	0.666268	0.404755	0.137616	0	0.217751	0.119777	0.0329059	0.108089	0.0813209	0.00271935	0.174939	0.169199
1533	0.710059	0.487618	0.00539193	0	0.353533	0.141091	0	0.159639	0.0608952	0.0750614	0.491156	0.240724
1534	0.975447	0.197452	0.198149	0	0	0.11646	0.28487	0	0.204591	0	0.0280795	0.108035
1535	0.331465	0	0	0.135536	0.320799	0.187172	0.156696	0	0.187926	0	0	0.229806
1536	0	0	0.700451	0	0	0.000985257	0	0	0	0	0	0
1537	0.278621	0	0.0035365	0.119366	0.221568	0.109628	0	0.000109468	0.200223	0	0.00810784	0.116381
1538	0.478658	0.425005	0	0	0.244799	0	0.221828	0.128204	0.149918	0.00805144	0.0219194	0
1539	0.601288	0.302001	0.041527	0.0147191	0.108459	0.26638	0.033318	0.218268	0.332551	0.185634	0	0.0523609
1540	0.513507	0	0	0	0.378146	0.513621	0.0901975	0.118695	0.116506	0	0.415232	0
1541	0.581358	0	0.0364657	0	0	0.187285	0.0294664	0.126707	0	0.0047919	0.500938	0
1542	0.459435	0.360065	0.480431	0.0143875	0.176855	0.255521	0.022626	0.114217	0.152703	0.174241	0	0.0818119
1543	0.47054	0.41458	0.120819	0	0.178917	0.269384	0.0182259	0.151244	0.100689	0.0189982	0.378982	0.140667
1544	0.204275	0.293343	0.218925	0.0122803	0.340281	0.088851	0.128114	0.157704	0.122082	0	0.118936	0.0344435
1545	0.373563	0.376569	0.326307	0.0486495	0.0954466	0.175982	0.0440519	0	0.25849	0.0619685	0	0.158124
1546	0.304476	0	0.220739	0	0	0.426156	0.0071143	0	0.137401	0	0.399435	0.198453
1547	0.277465	0.00135603	0.125821	0	0	0	0.0682413	0.00145733	0.118008	0.029968	0.0621717	0
1548	0.256271	0	0.360308	0	0	0.0121063	0.0335485	0	0	0.0444778	0.293545	0.113638
1549	0.14212	0.536702	0.159391	0.0637399	0.108118	0.194681	0	0	0.175817	0.113696	0	0.0578157
1550	0.40764	0.139735	0	0.147137	0.22301	0.163323	0.141605	0	0.287997	0.0306236	0.105867	0.166731
1551	0	0	0.320043	0.118157	0	0	0	0	0.00131667	0.0028545	0.0505677	0.0444327
1552	0.270001	0	0.0715004	0	0.1951	0	0.100236	0.000481577	0.274874	0	0.0216416	0.30606
1553	0.340621	0.0667209	0.121173	0.0895307	0.363194	0.247454	0	0.23558	0.176563	0	0.429186	0.0704958
1554	0.171798	0.252484	0.339996	0.0060029	0.160378	0.101174	0.0354567	0	0.0807501	0.011513	0.230033	0.205056
1555	0.302006	0.259932	0.132586	0.0397016	0.136789	0.102348	0.0419394	0.11142	0.180159	0	0.253031	0.10452
1556	0.314474	0.259503	0.108154	0.00526869	0.153838	0.230278	0	0.218953	0.152705	0	0.62039	0.102179
1557	0.398031	0.250206	0.315322	0.0291223	0.140027	0	0.178646	0.113072	0	0	0.0320325	0
1558	0.257694	0.153313	0	0.113079	0.642465	0.150798	0.0941859	0	0.0545593	0.0355626	0.0892267	0
1559	0.17897	0.094641	0.312476	0.193537	0	0.133909	0	0	0.0682455	0.0395765	0.321653	0.14432
1560	0.437514	0.293309	0	0.0448715	0.442746	0.163034	0	0	0.348628	0.00561387	0.424559	0.214438
1561	0.332028	0.949435	0.492687	0.0347606	0.22472	0.364489	0.0296883	0	0.0564788	0.165422	0.0109849	0.0289458
1562	0.337368	0.128842	0	0.0499228	0.306173	0.128813	0.0874519	0	0.141532	0	0.0772249	0.161024
1563	0.432756	0.108499	0.25512	0.025024	0.139053	0.193249	0	0	0.116509	0.0141411	0.322703	0.160286
1564	0	0	0	0	0.350334	0.3326	0	0.000382317	0.236877	0.0489656	0.103067	0.27301
1565	0.138783	0	0.157771	0.0379214	0.162813	0.193959	0.0481117	0	0.392722	0.0294173	0.0777841	0.141002
1566	0.727448	0.226047	0.0731712	0.081564	0.511081	0.111392	0.102612	0.193706	0.316721	0.00780763	0.147561	0.0655686
1567	0.513666	0	0.107042	0.0862403	0.260765	0.31404	0	0.179305	0.131533	0.0620809	0.0966684	0.179207
1568	0.220505	0.00222779	0.365716	0.0410705	0.202385	0.101444	0.075488	0	0.148293	0.130718	0	0.0537588
1569	0.090011	0.408385	0	0.0920698	0.206852	0.070282	0.13968	0	0.296076	0.0124354	0.043868	0.165629
1570	0.59341	0.4961	0.244803	0	0.240514	0	0.0489912	0.110355	0.288155	0	0	0.148495
1571	0.478526	0.344139	0.436732	0.00828499	0.21252	0.208051	0	0.0801465	0.04622	0.00518727	0.280918	0.107107
1572	0.109959	0.233599	0.207998	0	0.000272113	0.000921257	0.0632055	0.00086843	0.257041	0.022828	0.021454	0.0594981
1573	0.316645	0	0.581749	0.102475	0.209276	0	0	0.00156088	0.120926	0.0318257	0.0461325	0
1574	0.47161	0.173032	0.18428	0.0221874	0.144172	0.156312	0	0.0703358	0.165117	0.0145183	0.37579	0.160021
1575	0.329632	0	1.00938	0.0542719	0.330674	0.142787	0.0397697	0.0869724	0.0775072	0.0961637	0.0378739	0.0797113
1576	0	0.325362	0.0880589	0.0233584	0.157565	0	0.144082	0.121814	0.260832	0.0257592	0.0617024	0.0798403
1577	0.277881	0.254195	0.398231	0.143527	0.101785	0	0.0628461	0.000256926	0.124966	0	0.0468694	0
1578	0.253193	0.272083	0.559454	0.0675859	0.142124	0	0	0	0.218087	0	0.296393	0.163292
1579	0.69682	0.643926	0.285706	8.64033e-05	0.161855	0.122848	0.145259	0.137923	0	0	0	0.164331
1580	0.604805	0.238104	0.126286	0.0098347	0	0.188708	0.145445	0	0.171513	0.0573433	0	0.076451
1581	0.277311	0.516715	0	0.00877698	0.00643254	0.108128	0.0848364	0	0.29309	0	0.0232258	0.115265
1582	0.0978476	0	0.77041	0.0764757	0.277143	0	0.0170415	0	0.0728457	0.134737	0	0.0888361
1583	0.834418	0.449281	0	0.162207	0	0.372861	0	0	0	0	0.134697	0
1584	0.196278	0.649481	0.153263	0.0393778	0	0.154085	0.0516265	0.00144833	0.407164	0.118768	0.0490437	0.191547
1585	0.252879	0.00310116	0.342304	0.0371023	0.0983895	0.171196	0.0615176	0.126141	0.103987	0.084606	0.0226016	0.0522122
1586	0.317417	0	0.0801253	0.0441741	0.118323	0	0.066718	0	0.173994	0	0.0442711	0.0471738
1587	0	0.141503	0.260402	0	0.4001	0.206778	0.0398883	0	0.188581	0.0208959	0.120671	0.0980412
1588	0.414139	0.523278	0.366957	0	0.560851	0.126473	0.0684685	0.346302	0.144277	0	0.314955	0.175557
1589	0.115232	0.639239	0.635935	0.118751	0.309788	0	0.0191986	0	0.0820115	0.012865	0	0.029223
1590	0.284543	0.229426	1.11018	0.0585618	0.0823945	0.158701	0	0.103685	0	0.180382	0.0235045	0
1591	0.492683	0	0.0373958	0	0.554159	0.123507	0.00943973	0.199436	0.20551	0.0373633	0.460322	0.154004
1592	0.235951	0.435314	0	0.129694	0	0.000123451	0.0524476	0.120637	0.177783	0	0.0190873	0.0709917
1593	0.11683	0.669122	0.272108	0.00284639	0.206214	0.290945	0.0558432	0.100911	0.0913951	0.319988	0	0.0539933
1594	0.219076	0.0748451	0	0.0416564	0.60421	0.202804	0	0	0.194844	0.0633255	0.110005	0
1595	0.722932	0	0.122557	0.00963425	0.54134	0	0	0	0.150494	0.0740082	0.433586	0.11886
1596	0.546293	0.474386	0.282433	0.0157626	0.156743	0.257061	0.0403126	0.102856	0.210346	0.200102	0	0
1597	0	0.51833	0.00574734	0.0344989	0.164231	0	0.0997281	0	0.394632	0.0151979	0.0127462	0
1598	0	0.475011	0	0.110731	0.150104	0.000270904	0	0	0.441998	0	0.0604991	0
1599	0.103998	0.850959	0.226131	0.0851922	0	0.209296	0.0329054	0	0.154879	0.153601	0.0360569	0
1600	0.523776	0.328191	0.146943	5.56033e-05	0.29487	0.0960378	0.0589746	0.0928776	0.142886	0.0310735	0.235937	0.0456142
1601	0	0.316875	0.00742614	0	0.103579	0.145891	0.167637	0	0.234077	0.0165092	0.0479415	0.263201
1602	0.341176	0.611628	0.0180295	0.0656528	0	0.137203	0.126786	0.000116215	0.110794	0.0692767	0.0141845	0
1603	0.237351	0.289473	0	0.100972	0	0	0.120789	0	0.132462	0.0717893	0.0516571	0.194292
1604	0.813008	0.112819	0.0469814	0	0	0.156832	0.0761062	0	0.166787	0	0.576489	0
1605	0.330411	0.385439	0	0.0075701	0.0854238	0	0.0348611	0.00109798	0	0	0.072413	0.140876
1606	0.508922	0.133825	0	0	0.188328	0	0	0.291829	0.372721	0.0112434	0.585577	0.166179
1607	0.84036	0.26997	0	0.016233	0.232998	0	0.105874	0	0.216635	0	0.0472578	0.125623
1608	0.421728	0.358765	0.202514	0.0212676	0.228497	0.0849981	0	0	0.237089	0.00487098	0.448131	0.122313
1609	0.249036	0.367428	0.0991224	0.0495466	0	0.0962204	0.108567	0	0.149616	0.0320615	0.0187102	0.088221
1610	0	0	0.0122978	0.0914669	0.647523	0.195391	0.0521749	0	0.149585	0.0631866	0.0209892	0.0673533
1611	0	0	0	0	0	0.614644	0.000982142	0	0.324841	0.0761692	0.14584	0
1612	0.160683	0.169111	0.232697	0.0645857	0.16955	0.166834	0.0216961	0	0.099632	0.0326499	0.0498876	0.127886
1613	0.336826	0	0.11334	0.233327	0	0.217505	0.0455243	0.137856	0	0	0	0.0718003
1614	0	0	0	0.00973096	0	0.401674	0	0	0.224277	0.0831898	0.0421082	0
1615	0.976337	0	0.0728047	0	0	0.0045477	0.118836	0.342186	0.307902	0	0.51772	0.257632
1616	0.363302	0.252376	0.0664018	0.0808375	0.385655	0.106492	0.00376417	0.103161	0.0622036	0.0206921	0.0238808	0.0531546
1617	0.458791	0.233868	0	0.0604052	0.365858	0.141131	0	0.235903	0.0548	0.030866	0.461693	0.103171
1618	0.43762	0	0.45053	0	0.243979	0.169222	0	0	0.24503	0.0369528	0.2969	0.050237
1619	0.234334	0.215093	0.161492	0.00639478	0.205684	0	0.0819634	0	0.232662	0.00729439	0.117034	0.222059
1620	0.356978	0.277434	0.100685	0	0.202703	0.156967	0.0857235	0.103907	0.333403	0	0.0221217	0.161582
1621	0.410294	0	0	0	0	0.246433	0	0.2398	0.0382203	0.0853719	0.38109	0
1622	0.138655	0.0786341	0.168416	0	0.00726757	0.170846	0.0372189	0.059773	0.145364	0.00153931	0.212473	0.0301901
1623	0.495531	0.211484	0.0923188	0	0.2866	0	0.018459	0.0779812	0.0647713	0	0.349709	0.190135
1624	0.634931	0.679102	0.0496912	0.0409	0.0703665	0.145743	0.0353002	0.223898	0.255799	0.209725	0	0.114097
1625	0.53785	0.456826	0.118335	0.0533235	0	0.102021	0.164559	0	0.228167	0.0400771	0.0178222	0.113929
1626	0.106087	0.701023	0.160565	0.0952531	0.066191	0.144734	0.056315	0	0.383734	0.0614909	0	0.0426946
1627	0.658389	0.184522	0	0	0.308535	0.157325	0	0.166234	0.266704	0.066546	0.31594	0.11138
1628	0.301276	0.820503	0.214149	0.00410533	0	0.151247	0.104305	0	0.211398	0	0.130677	0.139355
1629	0.174994	0	0.0128926	0.104069	0	0.0652701	0.00812231	0.066384	0.0547402	0.0394264	0.0008561	0.0315809
1630	0.379466	0.342042	0.354663	0.196546	0.484875	0	0	0	0	0	0.0935886	0
1631	0.222221	0.287152	0.25167	0.0428358	0.070182	0.0790092	0.106953	0	0.209884	0.00810016	0.00472205	0.119039
1632	0.294256	0.0728378	0	0.113172	0.435777	0.00015397	0.0516787	0	0.284282	0.00800096	0.0471395	0.0555789
1633	0.497339	0	0.334482	0.0161308	0.224147	0	0.141071	0	0	0.030254	0.0506438	0
1634	0.441805	0.0771364	0	0.0651024	0.237489	0.213437	0.0759416	0.324267	0	0	0.400866	0.134738
1635	0.24631	0.264666	0.192348	0	0.256664	0	0.122418	0	0.00289965	0	0.0196311	0.181844
1636	0.404499	0.20582	0	0.0400872	0	0.11959	0.0275963	0	0.207301	0	0.187178	0.225643
1637	0.774373	0.20567	0.165429	0.0529275	0.221669	0.127779	0	0.148228	0.287399	0	0.453588	0.1347
1638	0.127979	0	0.0460069	0.0729697	0.0932806	0.0859379	0.0377525	8.20844e-05	0.0997226	0	0.012887	0
1639	0.452661	0.710527	0	0.0161302	0.146324	0.12784	0.0679021	0.349947	0.182135	0.180696	0.0231313	0
1640	0.289451	0.706915	0.577272	0.0559099	0.162336	0.0803624	0.0395256	0	0	0.168062	0	0.0539286
1641	0.144261	0	0.00251134	0.0830623	0.270302	0	0.00681081	0	0.212179	0.0812654	0.00219996	0
1642	0.539386	0.153226	0.215767	0.112414	0.0549432	0.00142613	0.0656928	0	0.00956605	0.00932166	0.214792	0
1643	0.523808	0.360978	0	0	0.303992	0.216939	0	0.189297	0.310986	0.0805655	0.389506	0.20533
1644	0.251491	0.138109	0.0224997	0.00570531	0.477581	0.168461	0.045329	0	0.218747	0.00766342	0.0141349	0.138384
1645	0.280469	0.675249	0.112629	0.00501186	0.136387	0.184926	0.07108	0.211345	0.0618475	0.132281	0	0.0480225
1646	0.100073	0.11101	0.43444	0.235753	0	0.092992	0	0.00159091	0	0.0285999	0.00633139	0
1647	0.344197	0	0	0.119721	0.279124	0	0.0159985	0	0.19391	0	0	0.152744
1648	0.0639545	0.422335	0.675638	0.066191	0.41055	0	0.0969593	0	0	0	0.0309209	0.0440312
1649	0.895807	0.309737	0.287437	0	0.399032	0.270446	0.0626182	0	0	0	0.155264	0
1650	0.664127	0.31944	0.212571	0.070681	0.250158	0.322825	0.0794477	0.000122086	0.127493	0.0423232	0.0763541	0.0920462
1651	0.0907412	0	0.193922	0.244954	0.155481	0	0.0641063	0	0	0	0.0334197	0.0438229
1652	0.206256	0.428537	0.214439	0	0	0.285626	0.0209254	0.17667	0.209608	0.166637	0	0
1653	0.330896	0	0	0.0693527	0.195014	0	0.0903155	0	0	0.0222028	0.0224097	0.147615
1654	0.344867	0.750992	0.112062	0.0350098	0	0	0.100922	1.823e-05	0.10393	0.033542	0.0435271	0.112795
1655	0.440829	0.20883	0.183846	0.020039	0.421136	0.0656678	0.0369043	0.224126	0.182875	0.010785	0.256495	0.0760151
1656	0.886964	0.191882	0.166095	0	0.000123079	0.120522	0.02468	0.293311	0.123354	0.00518131	0.256106	0
1657	0.704209	0.223945	0.0684966	0	0.500164	0	0.0272774	0.0936225	0.360862	0.024953	0.392767	0.145782
1658	0.29331	0	0.017322	0.179037	0.197511	0	0.00190675	0.0758973	0.117099	0.000785434	0.0189943	0
1659	0.556846	0.203507	0.13786	0.0857001	0.226714	0	0.150147	0.117419	0.189942	0.00514495	0	0
1660	0.437956	0.362986	0.025736	0.002979	0.129314	0.0819202	0.0919705	0	0	0.0383926	0.0362359	0.0718761
1661	0.21445	0.238898	0	0.0776773	0.401963	0	0	0	0.166772	0	0.062742	0
1662	0.627879	0.653648	0.198095	0.00601199	0.220238	0.0962987	0.0963974	0.00157019	0.29272	0.0881465	0.0412371	0.211775
1663	0.147939	0	0.0269584	0.215528	0.11886	0	0	0	0.249887	0.0493963	0	0.0848395
1664	0.221087	0	0.382069	0.0318307	0.101537	0.261079	0.00631263	0.00065582	0.183042	0.136536	0.036444	0.141256
1665	0.519445	0.239258	0.0401668	0	0.284146	0.131084	0	0.0717334	0.234976	0.00763129	0.306259	0.0754411
1666	0.397481	0.211531	0.103418	0.0692253	0.547763	0.0939871	0	0	0.169981	0	0.0375076	0.166729
1667	0.236508	0	0.422765	0.370806	0	0	0.0121636	0	0.120594	0	0.0801838	0.118798
1668	0.181412	0	0.021342	0.0253039	0.264241	0.19611	0.0483326	0	0	0	0.0240774	0.148436
1669	0.483293	0	0.051555	0.0973719	0.320871	0.000723963	0.0172941	0	0.160795	0.053825	0.273779	0.117298
1670	0.353288	0.316286	0	0.0487171	0.219595	0.112074	0.120464	0.111369	0.313613	0.00695263	0.067765	0
1671	0.325483	0	0.417392	0.142752	0.203274	0.163465	0.113598	0	0.291571	0	0	0.225669
1672	0.620046	0	0	0	0	0.349899	0.0100338	0	0	0.0637761	0.114588	0
1673	0.981514	0.447018	0.202859	0	0	0.107184	0.152435	0.121822	0.427399	0	0	0.243396
1674	0.296509	0.347491	0	0.0172039	0.179264	0.161442	0.228589	0	0.208662	0	0.0804224	0
1675	0.227527	1.12204	0.0176955	0.158673	0.109653	0.00217887	0.0516962	0	0.0901183	0.0373678	0	0.0940204
1676	0.147682	0.419893	0.558039	0.0598048	0.113061	0.0998246	0.0175636	0	0	0.0316908	0	0.0599794
1677	0.672753	0	0.377873	0	0	0.0010264	0.143184	0	0	0	0.0615777	0
1678	0.418397	0.384288	0.564944	0.0149564	0	0.248666	0.00811547	0.256063	0.353974	0.204071	0	0.123362
1679	0	0.29838	0.31938	0	0	0.418254	0	0	0.349589	0.0428941	0.225294	0
1680	0.385351	0.371185	0.00895214	0.0613748	0	0.165821	0.104443	9.37985e-05	0.173689	0.0459121	0.00017311	0.19294
1681	0.246647	0.80484	0.30181	0.0131736	0.107995	0.0996172	0.114404	0.123914	0	0.00729284	0	0.0624948
1682	0.575862	0.249906	0.264301	0.0474838	0.0125048	0	0.00373761	0.0832406	0.0744759	0.0162076	0.263755	0.12412
1683	0.461797	0.329773	0.525199	0.0241114	0.230929	0.225676	0.00265197	0.092659	0.228361	0	0.390019	0.121068
1684	0.363566	0.416843	0.255027	0.031598	0	0	0.159016	0.000244392	0	0.0874072	0.0174013	0
1685	0.246948	0.0430061	0.229842	0.0140005	0.25298	0.181538	0.0176854	0.173407	0.127544	0	0.416522	0.13131
1686	0.719202	0.280923	0.0753804	0.0259772	0.292151	0.122957	0.0476378	0.21647	0.320823	0.213884	0.0589592	0.242392
1687	0.259353	0.718911	0.235274	0.0703695	0.135545	0	0.0252952	0.0815419	0.0840405	0.0637209	0.0631703	0.0988894
1688	0.238671	0.142758	0.0707901	0.163095	0.471967	0.0998928	0.0160358	0	0.0680467	0.0393274	0.0264752	0.17611
1689	0.375504	0	0.204935	0.0222489	0.405764	0.140714	0.0116851	0	0.0898105	0.0246457	0.0305512	0.0619305
1690	0	0	0.445524	0.00621321	0	0	0.137615	0	0.124758	0	0.23018	0
1691	0.20695	0.228559	0.0233759	0.0325654	0.183245	0.11732	0	0.0592733	0.0835776	0.0455228	0.0473409	0.0445562
1692	0.406375	0.634574	0.192333	0.0405094	0.273589	0.103662	0.0657346	0	0.00430635	0.0648747	0.0511056	0.227273
1693	0.328016	0.00662215	0.513508	0.0680264	0	0	0.0403949	0.114695	0.304415	0.0649351	0	0
1694	0	0.441226	0	0.0458855	0	0.417556	0	0	0.114872	0	0.34252	0
1695	0.202599	0.418251	0.0932935	0.0194595	0	0.157355	0.0876497	0	0.0620509	0.0259052	0	0.0498244
1696	0.798358	0.292521	0.0389139	0.00851374	0	0.136352	0.028285	0.156467	0.337338	0.0400419	0.0120376	0.107485
1697	0.650352	0.242924	0.0163339	0.000352852	0.2889	0.276704	0	0.193718	0.143402	0.0367947	0.394085	0.148988
1698	0.387413	0.204437	0.0340725	0.0493832	0.0176958	0.189987	0.0917644	0	0.282364	0.0257241	0.0143396	0
1699	0.149835	0	0.0992006	0.0239708	0.319939	0.294781	0	0.268032	0.224152	0.0729038	0.449881	0.0789246
1700	0.24158	0.111668	0.0956448	0.210009	0.0123699	0	0.0246822	0	0.178976	0.00941835	0.227108	0.038022
1701	0.104049	0	0.466152	0	0	0.207023	0.0546839	0.144114	0.295579	0.0267252	0.00367799	0
1702	0.465274	0	0.423459	0.0271336	0.156392	0.000175962	0.0975994	0.000725982	0.262438	0.183675	0	0
1703	0.415304	0	0.161659	0	0.138794	0.191794	0.0353665	0.0971515	0.0689191	0	0.332532	0.0650211
1704	0	0.1506	0.198141	0.0630533	0.238848	0	0.0472568	0.00124817	0.00342273	0	0.380367	0.101712
1705	0.651674	0.434122	0.0196039	0.0644558	0.141829	0	0.0257263	0	0.112235	0.030901	0	0.0808133
1706	0.461962	0.142402	0.13531	0.0216502	0.266709	0.0765696	0.0406742	0	0.463682	0	0.0903206	0.142923
1707	0.273871	0	0.467654	0.0544723	0.0892621	0.189787	0	0.132256	0.123076	0.224402	0.0278604	0
1708	0	0.501251	0.678591	0	0.165986	0	0	0	0.0797749	0.0329061	0	0.0672946
1709	0.444251	0.385244	0.275698	0	0.374233	0.146857	0	0	0.157482	0.288681	0	0.0610121
1710	0.25734	0	0.00829832	0.162944	0	0.116765	0	0	0.166724	0.017418	0.0444666	0.0544704
1711	0.162889	0.19529	0.786034	0.143927	0	0	0.0716799	0	0	0	0.0595591	0
1712	0.531828	0.544487	0.122473	0.0374569	0.245085	0.123566	0.022038	0.000680683	0.229377	0	0.283627	0.139102
1713	0.375058	0.126795	0.0775579	0.00226207	0.199076	0.117135	0	0.126697	0.119872	0.0287137	0.520466	0.177177
1714	0.222807	0.061774	0.106315	0.043276	0	0.168493	0.0708173	0	0.121696	0.00347597	0.0717794	0.045065
1715	0.00282998	0	0	0	0	0.00021425	0.00599498	0.345882	0.00116429	0.00224895	0	0
1716	0	0.2706	0.131777	0.284535	0.426009	0	0	0.00105722	0	0.0456865	0	0.0422534
1717	0.511994	0.085503	0.0561958	0.0714875	0.591751	0.171711	0.0461137	0	0.0985067	0.00254491	0.0370373	0.0599964
1718	0.23445	0.00658102	0.0110925	0.00403664	0.389452	0.370893	0	0.240291	0.29159	0.0379293	0.625036	0.204677
1719	0.139205	0.726227	0	0.0893618	0.111699	0	0	0	0.38185	0.00686506	0	0.0941645
1720	0.532889	0.0767243	0.30208	0.00684973	0.274486	0.204597	0	0	0.0695437	0.0779455	0.324285	0.16567
1721	0	0.262953	0.134249	0.0376207	0	0.105162	0.156467	0.00251796	0	0.0432699	0.0742158	0.138979
1722	0.339554	0.200985	0.0185691	0.0331049	0.280745	0.141429	0.00521657	0	0.153752	0.00226966	0.410379	0.207378
1723	0.3413	0	0.157265	0	0.326253	0.00415799	0	0.000672884	0.342598	0.0685976	0.364279	0.249955
1724	0.226939	0.163442	0.0393212	0.0313515	0.410461	0.290402	0	0.20424	0.156429	0	0.39772	0.151523
1725	0.199127	0	0.446001	0.00192337	0.126958	0.3038	0.0704023	0	0	0.0431065	0.0360886	0.0791137
1726	0	0	0.0450214	0.0144167	0.0163923	0	0	0	0.137626	0	0.405067	0.100915
1727	0.196836	0.159942	0.224425	0.279175	0.364333	0.0905117	0.0103466	0	0.147254	0.0438019	0.0752086	0.0953652
1728	0.00757988	0.639795	0.742045	0.019735	0.172653	0.0981114	0	0.121463	0.0388633	0.270129	0	0.0204937
1729	0.291288	0.439072	0.128503	0.00715573	0.239097	0	0.0930825	0.00083784	0.31789	0.0132803	0.0621917	0.163365
1730	0.280113	0	0.0796921	0.0703409	0	0.463603	0	0.216064	0.168495	0.129057	0.142168	0.123353
1731	0	0	0.396511	0	0.322969	0.000323347	0	0	0	0.0284574	0.115344	0.174321
1732	0.480064	0.27471	0.0365864	0	0.464949	0.146298	0.0617033	0.00257567	0.114478	0	0.260866	0
1733	0	0.151378	0	0.0635137	0.274021	0.202445	0.0500279	0.126282	0.218668	0.045236	0	0.135647
1734	0.461107	0.107413	0	0.0822661	0.208274	0.154596	0	0	0.0882346	0.0237153	0.0214571	0.113331
1735	0.448605	0.481829	0.0092771	0.0301703	0.264418	0.0813292	0	0.165208	0.26477	0	0.254368	0
1736	0.592326	0.220492	0.0742828	0.0148971	0.112415	0.0887088	0.0900863	0.000717365	0.194034	0.0342043	0.0383001	0.17623
1737	0.243388	0.222161	0.00658201	0.00644148	0.245565	0.00726638	0.0696464	0	0.0527967	0.0665317	0.372749	0
1738	0.543555	0	0.611457	0.0574343	0	0.179369	0.00546676	0.00189183	0	0.11064	0.0455737	0
1739	0.313451	0.320909	0.0266151	0.0680651	0	0	0.0518042	0	0.264155	0.0272042	0.132897	0
1740	0.256094	0.278498	0	0.0403482	0.0255535	0.215405	0.0732544	0	0.140777	0.0344588	0.0799185	0.0649611
1741	0.362888	0	0.308705	0.0238244	0	0.340868	0.00683035	0.27444	0.38934	0.189023	0.0692625	0
1742	0.213295	0.379035	0.382514	0.0345364	0.150659	0.168257	0.000872544	0	0.245398	0	0.26768	0
1743	0.192821	0.151361	0.124198	0.0777331	0.166174	0.113387	0	0.119111	0.268434	0	0.200722	0.0584667
1744	0.405593	0.415323	0.165234	0	0	0	0.0793874	0.161784	0.153175	0.0111366	0	0
1745	0.576896	0.795854	0.708846	0	0.11939	0.181889	0	0.129122	0.149713	0.0782672	0.0541265	0.053338
1746	0.487436	0.275067	0.197644	0.0368758	0.336701	0.152053	0.0116933	0	0.140411	0.0333112	0.438838	0.0848142
1747	0.189614	0.344001	0.0748243	0.0317295	0	0.113635	0.0376719	0	0.303145	0.071777	0.0135921	0
1748	0.735396	0	0.422051	0.0323286	0	0.193335	0.125117	0	0.134457	0.0454972	0.20437	0
1749	0.158509	0.283573	0.380919	0.0797728	0	0	0.0585597	0	0.23985	0.0444734	0	0.0495426
1750	0.199001	0.595085	0.617639	0.0819866	0.091821	0.163297	0.0460577	0	0.19342	0.0220893	0	0.0533689
1751	0.384474	0.394653	0.67279	0.028594	0	0.267023	0	6.16216e-05	0.365289	0.166541	0	0.0947997
1752	0.557321	0.915416	0.125633	0	0.210005	0.172557	0	0.120341	0.462543	0.0888606	0.0782288	0.197099
1753	0.0754381	0.241005	0.072292	0.0207225	0.367657	0	0.0253018	0	0.159016	0.0425696	0.0274167	0
1754	0.667265	0.281827	0.345318	0.0250629	0.0342137	0.124324	0.0744441	0	0.270533	0.00363528	0.0261929	0.20915
1755	0.56425	0.33225	0.1417	0	0.238708	0.0999789	0.0109446	7.6385e-05	0.265538	0.0598152	0.213066	0.149673
1756	0	0.223658	0.746387	0.175306	0	0	0	0	0	0.0139865	0	0
1757	0.557363	0	0	0.043652	0.248692	0.124514	0.106593	0.127172	0.0616866	0.0600878	0.217436	0
1758	0.58517	0.163564	0.0982769	0	0.469859	0.290082	0.00519587	0.207554	0.17772	0	0.539296	0.09285
1759	0.423891	0.186639	0.307611	0.00428628	0.192632	0.000248108	0.0718156	0	0.214011	0.0287266	0	0.133747
1760	0.252009	0.221828	0.0696555	0.0929894	0.0138558	0.000843337	0.0307525	0.16773	0.187858	0.0548954	0.0878147	0
1761	0.337258	0.0924556	0.0464342	0.0279724	0.00754119	0.102526	0	0.266393	0.318909	0.0133738	0.30896	0.0823396
1762	0.293617	0.297675	0.159069	0	0	0	0.154057	0	0.140501	0	0.0647783	0.190034
1763	0.330186	0.531227	0.0228362	0	0	0	0.0512412	0.203331	0.13206	0.189662	0.0512641	0.139666
1764	0.105795	0.10438	0.397492	0.0218926	0.390789	0	0.00542627	0	0.137044	0.0700366	0.42193	0.149065
1765	0.372506	0	0.1613	0.09042	0.247664	0.171928	0.0351118	0	0.154328	0.0344904	0	0.0589564
1766	0.346844	0.315186	0.202582	0.0484431	0	0	0.100955	0	0.0604159	0.0127316	0.0415435	0.0505405
1767	0.613729	0.269682	0.268079	0.0523585	0.113803	0.19437	0.0135727	0.00024369	0.195264	0.118257	0	0.161719
1768	0.309494	0.13395	0.302478	0.0371029	0.157211	0.25621	0	0.231012	0.221417	0.0573643	0.372899	0.223989
1769	0.145148	0.10474	0.120222	0.140836	0.312784	0.161068	0.105375	0.107008	0.11928	0.0207345	0.0328832	0.0328872
1770	0.500859	0	0.020823	0.0861304	0.36373	0	0.035794	0	0.321365	0.0300622	0.0126314	0
1771	0.560052	0.372405	0.118704	0.0107239	0.120002	0.00160109	0.00188039	0.0683384	0.232477	0.00828537	0.336933	0.110519
1772	0.287583	0	0.169857	0.0474365	0.540085	0	0.0943878	0.159309	0.165035	0	0.387496	0.0579796
1773	0	0.711295	0.133948	0.00354074	0.169544	0	0.233223	0	0.372405	0.0133793	0.0491665	0.0611468
1774	0.280902	0.114832	0	0.183018	0.144407	0.0813762	0	6.0786e-06	0	0.0188637	0.0419714	0.0394732
1775	0.188202	0.486394	0.0638694	0.095106	0	0.0849337	0.0725881	0	0.256889	0.0308318	0	0.0492481
1776	0.347293	0.234001	0.0751619	0.020776	0.201205	0.10644	0	0.250506	0.234122	0.0181542	0.507388	0.200024
1777	0.38843	0	0	0.00464477	0	0.164202	0.193483	0	0.370825	0.0600474	0.0157542	0.203306
1778	0.260619	0.420438	0	0.0840551	0.788659	0.219006	0	0	0	0.0468708	0.0347211	0.0660757
1779	0.411164	0.00154912	0.123162	0.0532806	0	0.000629671	0.0408719	0.212013	0.0863155	0.0962658	0	0.0756409
1780	0.170362	0.0574887	0	0.111586	0.291707	0.134562	0.0258366	0	0.0375459	0.0477626	0.0744034	0.0602226
1781	0.330074	0.58524	0.214575	0.0711723	0.186052	0	0.146979	0	0.0530323	0.100217	0.10304	0.172155
1782	0.203646	0.287705	0.050163	0.164143	0.252156	0.144938	0	0	0.188519	0	0.104444	0.0502396
1783	0.369	1.08822	0.26632	0	0	0.123742	0.104419	0.000549865	0.347825	0.0499382	0.0519207	0.144383
1784	0.457448	0.272328	0	0	0.289078	0	0	0.109848	0.282808	0.0341228	0.374196	0.230108
1785	0.291938	0	0.0387832	0.154759	0	0.000206609	0.0297412	0	0	0.00594079	0.0276653	0.0542323
1786	0.220556	0.115014	0.1113	0.165083	0.19422	0.143811	0	0.102798	0.243465	0.0416018	0.0635785	0.0893413
1787	0.263183	0.174118	0.160591	0.00776913	0.0184806	0.229503	0.0750547	0	0.216372	0.0394868	0.00257471	0.117657
1788	0.183544	0.21251	0.289202	0.0137114	0.289507	0	0.030397	0.000195803	0.238313	0.0361472	0	0.158188
1789	0.755815	0	0.101482	0.0559623	0.125885	0.0913957	0.000761471	0.242467	0	0.0584777	0.289988	0.24125
1790	0.392418	0.274753	0.0764789	0.0343362	0.311857	0.112613	0.173312	0.120434	0.119754	0.0158829	0	0.078858
1791	0.314083	0.590759	0.168045	0.0119264	0.338265	0.0786006	0.13763	0	0.377651	0	0.0660263	0.0561777
1792	0.177004	0	0.714266	0.0555008	0.143495	0.192568	0	0	0.201195	0.0316961	0.103208	0.0499196
1793	0.124691	0.21087	0.0307748	0.339511	0.378299	0.131684	0.00117655	0	0	0	0.0595283	0.0922273
1794	0.0740926	0.123453	0.0534576	0.0828213	0.234487	0.0767838	0.0322201	0	0.26503	0.000524445	0.0999562	0
1795	0.130672	0.0595958	0.125271	0.0425112	0.200102	0.107139	0	0.0739385	0.202263	0.00904724	0.332366	0.049703
1796	0.804646	0	0	0.109808	0.183704	0	0.144493	0	0	0	0.00694995	0.116349
1797	0.358391	0.742875	0.402134	0.0412073	0.00180411	0	0.0754526	0	0.217867	0.0186075	0	0.0876625
1798	0.18659	0.589355	0.563724	0	0	0.20808	0	0.183078	0.12526	0.170021	0.00445771	0.0734364
1799	0	0.192413	0.349319	0.0893326	0	0.300846	0	0	0	0.0241151	0.0373478	0
1800	0	0	0.0345813	0.0436044	0.0968163	0	0.0230792	0	0.0247889	0	0.00926085	0
1801	0.531049	0.200828	0.274037	0.0244443	0.206468	0.0943543	0.0309864	0.196782	0.198847	0.302976	0	0.0792082
1802	0.108914	0.213479	0.183352	0.049867	0	0.0872292	0.129855	0	0.251054	0	0.0154018	0.10942
1803	0.378148	0.287313	0	0	0	0.291994	0	0	0.200999	0.325931	0.0241175	0
1804	0.449884	0	0	0.0888553	0.353837	0.085537	0.0470523	0	0.125008	0.0427499	0.0425912	0.0565884
1805	0.38044	0.23381	0	0	0	0.250629	0.0440234	0	0.261549	0.28373	0	0.0880453
1806	0.106874	0.372057	0.335952	0.0445571	0.192595	0	0.0827311	0.000418839	0.205629	0.0281288	0.0344893	0.16021
1807	0.342923	0	0.118959	0	0.134077	0.00121407	0.28798	0	0.274198	0.0189187	0	0.203054
1808	0.407766	0.466651	0.321865	0.0164592	0.187478	0	0.0302007	2.71686e-05	0.0888544	0.00335679	0.142945	0.143042
1809	0.621097	0.636115	0	0.0632266	0.272104	0.00279834	0.0245952	0	0.245549	0	0.109053	0.210673
1810	0.112899	0.187497	0.0900741	0.307823	0.476603	0.0988239	0.03051	0	0	0	0.00953786	0
1811	0.580933	0.253625	0.125057	0.11204	0.283277	0.00120446	0.0755517	0	0.216291	0	0.10459	0.0514006
1812	0.362435	0.147786	0.32562	0.065712	0.158827	0.231484	0	0.263168	0.218964	0.235134	0.00572253	0.131332
1813	0.218445	0.362654	0.0541028	0	0.097659	0.0604559	0.0703981	0	0.259157	0.0254603	0	0.137875
1814	0.514891	0.165775	0.0436396	0.00464271	0.562553	0.220973	0	0.156205	0.157702	0.0998036	0.377849	0.13553
1815	0.256255	0.875503	0.141551	0.0307396	0.1294	0	0.0149441	0	0.314514	0.0446897	0.0532284	0.136743
1816	0.418307	0.131763	0	0.00533826	0.330365	0.249662	0	0.087384	0.122923	0	0.450407	0.182975
1817	0	0.22716	0.327403	0.172416	0.248203	0.00140069	0.00105258	0	0.136705	0	0	0.158211
1818	0	0.0113844	0.817955	0.0314409	0.142906	3.18737e-05	0.0865902	0.00147869	0.250191	0.0119137	0	0.0530051
1819	0.372389	0.556896	0.34921	0.154425	0.141564	0	0.0583432	0	0.220306	0.0396763	0	0.182982
1820	0.361299	0.300797	0.876897	0.0220474	0.0546532	0.196878	0.0523272	0.0701003	0.13534	0.175174	0	0.040953
1821	0.493228	0.689192	0.210462	0.0578141	0	0.324484	0.0240765	0.164103	0.207215	0.142823	0.086585	0
1822	0.350049	0.36929	0	0.0985471	0.239211	0	0	0	0.0817968	0	0.168676	0.101473
1823	0.0557479	0.130538	0.590493	0.0910784	0.120655	0.153687	0.12965	0.112355	0	0.00618481	0	0.0411214
1824	0.129217	0.244426	0.102222	0.0596066	0.0802828	0.0878679	0.0240383	0	0.169155	0.0749675	0	0.125096
1825	0.185516	0.079499	0.0445963	0.126999	0.413156	0.221378	0.066508	0	0.0515032	0.0262831	0.0674621	0
1826	0.184353	0.170217	0.766971	0	0.225698	0.262989	0	0.142804	0.108903	0.125715	0	0.0940866
1827	0.368569	0.0892023	0.442189	0.0158397	0.208036	0.0789083	0.00967548	0.0882522	0.19331	0.00138056	0.282145	0.0907317
1828	0.672165	0.478435	0	0	0	0.24415	0.00505648	0.220518	0.270749	0.120451	0	0
1829	0.692901	0.340226	0.0614802	0	0.41214	0.229982	0.0210095	0.341832	0.378529	0.0341561	0.266278	0.169633
1830	0.184525	0.256535	0.373854	0.0298133	0	0	0.181189	0	0	0.0586482	0	0
1831	0.542744	0.393834	0.123476	0.106748	0	0.202992	0.0918149	0	0.232228	0	0.388841	0.169524
1832	0.333489	0.307836	0.172479	0	0.164293	0.122424	0.0285642	0.2351	0.0292898	0.00818417	0.196257	0.028917
1833	0.405582	0.579887	0.00969461	0.0763033	0	0.109201	0.182004	0.122001	0	0.0446532	0.113468	0
1834	0.305874	0.266392	0.460957	0.0277054	0.127178	0.12965	0	0	0.155471	0.0538967	0	0
1835	0.200741	0.107936	0	0.00232862	0.152268	0	0	0.069642	0	0.0707396	0.192805	0.0691317
1836	0.0891461	0.346171	0.0508746	0.178229	0	0.158585	0.0853322	0	0.0353387	0.0606677	0	0.0443018
1837	0.308582	0.268514	0.162445	0.117254	0.380356	0.158703	0	0	0.0497305	0.0251479	0	0.0414503
1838	0	0.287153	0.0205879	0.0905231	0.00116323	0	0	0.00139324	0	0.0648552	0.0784128	0
1839	0.237006	0.00682922	0.00960433	0.0443156	0.379004	0.228364	0.00310627	0.00160653	0.0814746	0.0108219	0.0443387	0
1840	0.544794	0.180987	0.0947133	0.0935539	0.339282	0	0	0.178542	0.128183	0.00331709	0.293288	0.17047
1841	0.237144	0.206368	0	0.00863732	0.73682	0.136347	0.00453484	0.227429	0.263664	0.0279018	0.452352	0.168166
1842	0.467076	0	0.0264679	0.0149079	0.482282	0.206991	0.041846	0	0.00249748	0	0.0864842	0.0797929
1843	0.545272	1.01877	0.212758	0	0	0.229039	0.0320214	0.167478	0.168963	0.224637	0	0.155855
1844	0.215363	0.343644	0.125883	0.0847198	0	0.145434	0.0226	0	0	0.0508074	0.0260427	0.0561128
1845	0.254318	0.300976	0.210473	0.0558017	0	0.111589	0.0929332	0	0.219467	0.0509576	0.125056	0.0738338
1846	0.317205	0.103375	0.017678	0.0206861	0.14452	0.161309	0.0129117	0	0	0.0039547	0.132134	0.0608677
1847	0.626368	0.485522	0	0.0407411	0	0.0859799	0.0465099	0.21162	0.222754	0.256342	0.0287255	0.193778
1848	0	0.163428	0.295962	0.0243046	0.252817	0	0	0.213388	0.189633	0.0472017	0.251836	0.155045
1849	0.303919	0	0.0238466	0	0.326597	0.429047	0.0571029	0.179476	0.252526	0.00477702	0.305434	0
1850	0.612911	0.381043	0.0942676	0.0764659	0.256713	0	0	0	0.254324	0	0.0685165	0
1851	0.352475	0.390049	0.126157	0.0239917	0.133549	0.168321	0	0.22754	0.0934508	0.018806	0.403795	0.105481
1852	0.106659	0.159315	0.168858	0.00694947	0	0	0.152835	0.000191395	0	0.0648945	0.112107	0
1853	0.108623	0.408869	0.547082	0.0196916	0.319026	0	0.0185486	0.113694	0.319371	0	0.196473	0.0372769
1854	0	0	0	0.094462	0	0	0	0	0	0.000206026	0	0
1855	0.17887	0.320546	0.00450979	0.00190241	0	0.0609547	0.0295831	0.0951719	0.0930884	0.00637222	0.236167	0.0818852
1856	0.377885	0.330029	0.196449	0.00607796	0.201913	0	0.0856734	0.00062265	0.212111	0.0377392	0.0284145	0.104586
1857	0	0.0793893	0.0298084	0.0673725	0.325301	0	0.0805929	0	0.0590848	0.0177534	0	0.0610014
1858	0.0376489	0	0	0.103661	0.122489	0.159936	0	0	0.0824985	0.00425443	0	0.0272828
1859	0	0	0.539401	0	0	0	0.0740778	0.0023012	0	0	0.0433219	0
1860	0.280048	0.182739	0.222969	0.233624	0.0588515	0.00110082	0.0580595	0	0.13808	0	0.142788	0.0735261
1861	0.266315	0.187745	0.183727	0.0196161	0.00148137	0	0.0748268	0.0915063	0	0.00521667	0.0625352	0.100429
1862	0	0	0.0260162	0.0254396	0.162717	0.117103	0.201163	0.198858	0.155372	0.0130215	0.0290699	0.115468
1863	0.730967	0.340717	0.0122347	0.012768	0.37022	0.00334201	0.0323331	0.544448	0	0.035754	0.365857	0
1864	0.526528	0.226554	0.106822	0	0.15188	0	0.129031	0.134675	0.286095	0.0937607	0.0231698	0.081614
1865	0.325345	0.220223	0.117681	0.0321224	0.0707273	0.00251897	0.0448453	0.195979	0.370985	0.03698	0.0343355	0.158624
1866	0.5426	0	0.181213	0.0229319	0	0.100829	0.156297	0.000420915	0.104839	0.0069429	0	0.175826
1867	0.216697	0.279051	0.132316	0.0380965	0	0.252412	0.0710629	0.123395	0.109234	0.0434046	0.0137961	0.046423
1868	0.309363	0	0.408203	0.0554532	0.127235	0.0912456	0.0581751	0.112615	0.331591	0.0611095	0	0.0456083
1869	0.463801	0.399753	0.206899	0	0.456499	0	0	0.283134	0.275639	0.0737897	0.342401	0.150999
1870	0.67242	0.23699	0	0	0.443365	0	0.0178502	0	0.201258	0.0489455	0.341981	0.0998584
1871	0.665827	0.248209	0	0.0622072	0.262308	0	0.124952	0.0812778	0.239634	0.0491755	0	0.147889
1872	0.121437	0.273545	0	0	0.139175	0.101156	0.0148747	0.0571293	0.0375525	0.018265	0.129022	0
1873	0.415426	0.361963	0.0334466	0.00969324	0	0.127231	0.235316	0	0.272669	0	0	0.192611
1874	0.408114	0.974704	0.184311	0.113264	0.204953	0.104487	0	0	0.276918	0	0	0
1875	0.409958	0.952464	0.188756	0	0.212358	0.363862	0.0455414	0.10244	0.280113	0.215568	0.0550059	0.166837
1876	0.211774	0.0682007	0.126458	0.0115657	0.22344	0.115178	0.0196139	0.116099	0	0.0120583	0.14542	0.105241
1877	0	0.457089	0	0	0	0	0.0781242	0.188559	0.21463	0	0.330382	0
1878	0.776195	0	0	0	0	0.00196996	0.0114948	0.254337	0.130629	0.0593903	0.191628	0
1879	0	0.00991857	0.103075	0.0692388	0	0.000460853	0.077641	0	0	0.086414	0	0.0449777
1880	0.440319	0	0.500791	0	0.0587739	0.225475	0.00459197	0.0799896	0.2986	0.239952	0	0.0276157
1881	0.27027	0.00425972	0.427859	0.0547914	0.146529	0.000412596	0.0307616	0	0.226128	0.0567847	0.00465502	0.066411
1882	0.414768	0.401018	0.20069	0.0629501	0.00109496	0.00130151	0.0378351	0	0.109978	0.00902508	0.128968	0.220375
1883	0.148106	0.234545	0.117404	0.0277056	0.220054	0	0.0639265	1.8576e-05	0.116914	0.00906768	0.0160164	0.140241
1884	0.0513366	0.564348	0.136336	0.111235	0.560385	0.117549	0	0.140308	0.124541	0.076517	0.10485	0
1885	0.103794	0.0620735	0.198192	0.39033	0.216218	0.162789	0.0325999	0	0	0	0.0247893	0.0469146
1886	0	0.402105	0.00107788	0.0419196	0.60381	0.00129653	0.0351621	0	0.129427	0.007416	0.00206576	0
1887	0.15366	0.600276	0.298012	0.131151	0.117051	0	0	0	0.08103	0.021928	0	0.142787
1888	0.273766	0.634395	0.00215741	0.0210923	0	0.111855	0.0397882	0	0.379209	0.064991	0.107841	0.0741659
1889	0.173477	0.217785	0.132057	0.0915154	0.46206	0.00298766	0.0364406	0	0.0589755	0.017088	0.0342745	0.062221
1890	0	0.341968	0.794472	0.123728	0.122679	0.114902	0.00208256	0	0.15872	0.0469563	0	0.104861
1891	0.419351	0	0.100562	0.104213	0.212678	0.0944321	0.0795721	0.108621	0.20491	0.000721729	0.259149	0.129088
1892	0.0840773	0.507066	0.242987	0.0364067	0.0768351	0.14055	0.0828393	0.0931737	0.223079	0.0456596	0.0274624	0.0926571
1893	0.145766	0.284005	0.425629	0.0432336	0.200093	0.121001	0	0.254859	0.0993658	0.012142	0.147693	0.107355
1894	0.231816	0.30929	0.0293256	0.0531752	0	0.128164	0.129377	0	0.352436	0	0.00237474	0.223434
1895	0	0	0	0.180427	0	0	0.145054	0	0.0537285	0.0234555	0.0434346	0
1896	0.100759	0.186013	0.168153	0.351676	0.192938	0.0869677	0	0.101572	0	0.0242803	0	0.0479151
1897	0.298219	0	0.657832	0.0485309	0.00536914	0.238006	0	0.36689	0.15375	0.0263407	0.145065	0.171705
1898	0.451486	0.188908	0	0.17103	0	0	0.078585	0	0.353781	0.0269341	0.341322	0
1899	0.703557	0.18103	0	0.00748803	0.214321	0	0.0566741	0.00218367	0.168292	0.0241848	0.251678	0
1900	0.210815	0.43468	0.499509	0.0345529	0.193599	0.106314	0	0.121561	0.0920469	0	0.33361	0
1901	0.204278	0.298633	0.173323	0.0107408	0.144858	0	0.0589344	0	0.363607	0.0898162	0.0368168	0.103495
1902	0.377221	0.346	0.190197	0.245558	0	0	0	0	0	0	0.128197	0.0713584
1903	0.173921	0.203256	0.133987	0.158557	0.559211	0.106904	0	0	0.183052	0.0237094	0	0.090274
1904	0.417474	1.05531	0	0.161636	0.182158	0	0.251302	0	0.348466	0	0	0
1905	0.378308	0.487486	0.706031	0.0419206	0.303827	0.186027	0	0.216591	0.0621541	0.0138103	0.232436	0.0674718
1906	0.139983	0.181312	0.100192	0.00306473	0.277528	0.0975484	0.093382	0.000777252	0.340129	0.0295984	0.037264	0.160717
1907	0	0	0	0.000501731	0	0	0.0148967	0	0.206193	0.041161	0.0913863	0
1908	0.163806	0.0995203	0.0523444	0.101397	0.561648	0.105206	0	0	0.110774	0.0300995	0.0523576	0.115633
1909	0.477891	0.322168	0	0.0889138	0	0	0	0	0.0936883	0.0659955	0.0479887	0
1910	0.592824	0.183458	0.133664	0	0.263296	0.192618	0.0511163	0.201532	0.223441	0.00298425	0.416346	0.184068
1911	0.185155	0	0.564284	0	0.388656	0.37292	0	0	0	0.00846811	0	0
1912	0.418777	0	0.226823	0.0393745	0	0.191425	0.108619	0	0.0892914	0.0202344	0.0848107	0.0606633
1913	0.261695	0.0934139	0.0442133	0.0483327	0	0.0993558	0.00825259	0	0	0	0.10035	0.0538226
1914	0.554517	0.600704	0.376663	0.0685736	0	0.214201	0	0.164097	0	0.242401	0.0609152	0.0738072
1915	0.438923	0	0	0.01251	0.301055	0.0884223	0	0	0.318162	0.0861332	0.527757	0.174634
1916	0.185754	0.00625715	0.314736	0.114466	0.271535	0.1003	0.0924812	0	0.069627	0.0291348	0.0422143	0.147088
1917	0	0	0.634698	0	0	0.00614611	0.00356303	0	0	0.0207915	0.0228487	0
1918	0.320386	0.0494849	0.389127	0.102882	0.785608	0.00166512	0.0254937	0	0	0	0.0286323	0.116
1919	0.0990628	0.565872	0.177172	0.0364066	0.0760856	0.187834	0.0453444	0	0.21173	0.0488774	0.0309546	0
1920	0.182986	0.217378	0.525526	0.0354648	0.238762	0	0.048657	0.092032	0.0698736	0.0124782	0.343727	0
1921	0.363905	0.786272	0.0292243	0	0	0.321177	0	0.201846	0.079209	0.112008	0.0691783	0
1922	0.162586	0.406791	0.149249	0.0531118	0.128755	0	0.052173	0.136243	0.171298	0.015996	0.0387519	0
1923	0.402487	0.586789	0.466613	0.062585	0.0883555	0.246552	0	0.133187	0.304227	0.283787	0	0.0502049
1924	0.31315	0.286472	0.0917721	0.0446749	0.140491	0.12197	0.0289412	0.0647592	0	0	0.0408715	0
1925	0.129246	0	0	0	0	0	0	0.169803	0	0	0.0551037	0
1926	0.338302	0.298475	0	0.0639991	0.658998	0.0943855	0	0	0.137217	0	0.071577	0.0573578
1927	0.256364	0.275552	0.308437	0.063162	0.0798549	0	0.0801351	0	0.09556	0.0576375	0.0312098	0
1928	0.247228	0.25296	0.322712	0.000710115	0	0.121489	0.122668	0	0.153114	0.014956	0	0.168483
1929	0.277843	0	0.113469	0.0315466	0.425792	0.111673	0	0	0.185854	0.037514	0.296722	0.173776
1930	0.254801	0.428503	0.0980024	0.0239846	0	0.000232961	0.117615	0	0.20365	0.00534236	0.0752252	0
1931	0.371143	0.156609	0	0.071243	0.00563291	0.000190581	0.124552	0	0.311308	0.0244641	0	0.0715347
1932	0.189046	0.178857	0.209115	0.0274916	0.128928	0	0.0955357	0	0.122342	0	0.176651	0.0970732
1933	0.344595	0.287683	0.745308	0.135166	0	0.254133	0.0330027	0.160871	0.235527	0.131778	0	0
1934	0.494463	0.955635	0.443111	0.0977482	0.208631	0	0	0.127491	0.199165	0.0308449	0	0.0711169
1935	0.429297	0.75329	0.592169	0.0294319	0.0846245	0	0.0627878	0.0882087	0.0395269	0.214856	0.00993151	0.0635151
1936	0.299139	0.00570397	0.149918	0.0527171	0.256885	0.000620053	0.0270984	0	0.235636	0.0285192	0.0368726	0.0787676
1937	0.205226	0.361439	0.0450765	0	0	0	0	0.215986	0.222153	0	0.0720317	0
1938	0.290817	0	0.33334	0.0287738	0	0	0.149995	0	0.218089	0.00481786	0.0429434	0
1939	0	0	0.717539	0.197874	0	0	0	0	0	0.0728852	0.0564492	0
1940	0.166969	0	0.232305	0.0259261	0.145258	0	0.0182023	0	0.133186	0.204529	0	0.0582027
1941	0	0.00901394	0.226933	0.0738139	0	0.000337679	0.0162866	0	0	0.0109965	0	5.7839e-05
1942	0	0.498776	0.459447	0.111399	0.304233	0.152023	0.129139	0	0.129716	0	0.035683	0
1943	0.436218	0.314405	0.0887702	0	0.334236	0.0694823	0.0205502	0.148905	0.275092	0	0.474538	0.065046
1944	0.438798	0.370915	0.212403	0.0315693	0.460945	0.0875732	0.0486104	0.178981	0.251296	0.0328448	0.314892	0.154223
1945	0.84148	0.0794868	0.00512982	0.00455511	0.258295	0.140556	0.00826098	0.262693	0.096328	0.0636462	0.42788	0.193241
1946	0.217269	0.500534	0.410833	0.0262516	0.0615755	0.250607	0.0495269	0.219042	0.184587	0.112232	0.0400367	0.0511705
1947	0.337479	0.685194	0.252504	0.0617927	0	0.254834	0	0	0	0.16978	0	0.0401228
1948	0	0	0	0	0	0.00940543	0	0.362725	0.177983	0.0460323	0.0976093	0
1949	0.212863	0.331653	0	0.143014	0.0015738	0.0989523	0.0428386	0	0.110272	0.00576828	0.0194995	0.135731
1950	0.078044	0	0.00610035	0.0123827	0	0.00133125	0.0559127	0	0	0	0.115815	0.063972
1951	0.133683	0.153917	0.657014	0.0860515	0.0739932	0.191486	0	0	0.137231	0.145805	0.0920429	0
1952	0.275993	0	0.0579308	0	0	0	0.0908105	0	0.177173	0.0176803	0.541974	0.112453
1953	0.108396	0.144623	0.557199	0.010647	0	0.122643	0.106408	0.115455	0.0692154	0.0102326	0.196078	0.13471
1954	0.17317	0.591667	0.193087	0	0	0.000519018	0.154321	0	0.304695	0.00456223	0.0227699	0.145307
1955	0.262118	0.051212	0.447866	0.0124021	0.18915	0.0525968	0.0380604	0.107636	0.0862333	0	0.148676	0.048698
1956	0.255277	0.19873	0.348238	0.0152842	0.19226	0	0	0.0680137	0.116306	0.00774822	0.171842	0
1957	0.48376	0.507039	0.12716	0	0.558252	0.16328	0	0.362544	0.186641	0.0156468	0.351632	0.0859745
1958	0.252675	0	0.142479	0	0.011891	0.251013	0	0	0	0.0288976	0.255591	0.204696
1959	0.407922	0.457064	0	0	0.494057	0.234891	0.0141522	0.152706	0.173432	0.0304698	0.514412	0.077876
1960	0.255431	0.742524	0.639575	0.00764098	0	0.200472	0.0363987	0	0.110688	0.189996	0	0
1961	0	0	0	0.0536307	0.214444	0.255245	0.00404529	0.14929	0.0664787	0.0423123	0.0474823	0.150984
1962	0.110416	0.665711	0.323177	0.0503332	0.155061	0.119342	0.0904985	0.153945	0.284641	0.0182785	0	0.0631381
1963	0.362478	0.498759	0.261656	0.0109328	0	0	0.0127711	0.000848616	0.169929	0.0525157	0.0680841	0.155055
1964	0.394747	0.388948	0.184552	0.0285801	0.186507	0.000757245	0	0.138216	0.252978	0	0.442072	0.101085
1965	0.118804	0.0419446	0.0556273	0.0279233	0.289046	0.237997	0.0475644	0	0.194566	0.0691058	0.0296673	0.0677892
1966	0	0	0.586968	0	0	0	0.0200884	0.000125429	0	0.00204377	0.0360479	0
1967	0.224295	0	0.0487731	0.138148	0.13612	0	0.0276215	0.161734	0.174736	0.0290844	0.271548	0.066288
1968	0.429843	0.056497	0.175177	0.134205	0.0705024	0.273715	0	0	0.00816773	0	0.0416616	0.077352
1969	0.15317	0.236909	0	0.105769	0.695726	0.162486	0.0343086	0	0.268082	0	0.0619906	0.192065
1970	0.295145	0	0.101795	0.0577538	0	0.19145	0.0329883	0.180587	0.0898844	0.11209	0	0.0705632
1971	0.264414	0.0819456	0.0324005	0.0503553	0.545222	0.263739	0	0.113247	0.293579	0.0125492	0.455034	0.152612
1972	0.192604	0.235826	0.682173	0.086903	0.129456	0.0950646	0	0	0.0201607	0.0214027	0	0.0536555
1973	0.204279	0.096646	0.458977	0.0408709	0.169631	0.133213	0.036494	0.159107	0.0918427	0.0499527	0.296049	0.123587
1974	0.0978452	0.183537	0.177974	0	0	0.000775287	0.0297486	0.308488	0.100535	0.20412	0.638686	0.0849249
1975	0.0403553	0.310743	0.207736	0.086114	0.086908	0.0952273	0.0466428	0.116901	0.362114	0.0374562	0	0.0459219
1976	0	0.172999	0	0.0339348	0	0.115454	0.0959982	0	0.163143	0.0707348	0.0122834	0
1977	0.437929	0.126999	0.377296	0.0716116	0	0.216158	0.0154137	0.175842	0	0.0179054	0.278447	0.111608
1978	0.190542	0.398211	0.387103	0.0846635	0.0928311	0.378428	0.0163076	0	0.0310182	0.125811	0.078248	0.0783316
1979	0	0.0528684	0.0838431	0.172737	0.301973	0.116217	0.0501635	0	0.0890193	0.0509267	0	0.0698422
1980	0.345982	0.635867	0.297516	0.192151	0	0.145631	0.130985	0	0	0	0.0205194	0.0972254
1981	0.197337	0.289279	0.15243	0.0865596	0	0.156661	0.0983984	0.00127202	0.230331	0.054211	0	0.0953057
1982	0.400563	0	0.254619	0.0870398	0	0.140923	0.122694	0.0926982	0.363741	0.121302	0.117051	0.0477977
1983	0.279508	0.317846	0.176001	0	0.407402	0.201773	0.0397044	0.0981278	0.221401	0.00759483	0.389469	0.0447948
1984	0	0	0	0.00445606	0.00331766	6.12531e-05	0.00487107	0.000790222	0.000490918	0.00601187	0.0361705	0
1985	0.36303	0.108857	0	0.00887634	0.318438	0.155561	0	0.155082	0.123145	0.0410892	0.457752	0.258157
1986	0.18407	0.191366	0.0721623	0.00236867	0.260044	0.357513	0	0.184288	0.144826	0	0.448252	0
1987	0.233829	0	0	0.242633	0	0.0990512	0.0745577	0.111515	0.247916	0	0	0.144736
1988	0.563687	0	0.0485233	0.0041781	0	0.237909	0	0	0	0.0159001	0.187131	0.116722
1989	0	0	0.173146	0	0.247011	0.360135	0.0660627	0.337377	0	0.0122082	0.533134	0.0936239
1990	0.642365	0.481764	0.0292516	0.00817819	0	0.205513	0.0458607	0	0	0.0118224	0.0485569	0.103695
1991	0.271002	0	0	0.134757	0.219643	0.0886321	0.0413171	0	0.127395	0	0	0.0497228
1992	0.452229	0.432802	0.0611734	0.0738717	0.321642	0	0	0	0.0789188	0	0	0
1993	0.136716	0.0295537	0.20819	0	0.501074	0.0646374	0.0200293	0.079527	0.234138	0	0.601991	0.0568653
1994	0.34454	0	0.0102832	0	0.295932	0	0.00726853	0.345875	0.109175	0	0.352253	0.174516
1995	0.166293	0.102515	0.0994615	0.051552	0.421352	0.000582513	0	0	0.122427	0.0196295	0.0296122	0.0927985
1996	0	0.0106741	0.61486	0.0475635	0	0	0	0	0.0121013	0.027949	0	0.0327244
1997	0.258796	0.211772	0.0080746	0.0416958	0	0	0.0114921	0.000162671	0.0905908	0	0.0246562	0.106183
1998	0.687184	0.0632443	0.0730488	0.00464766	0.423066	0.0814912	0	0.170066	0.197933	0	0.410711	0.16764
[truncated: 1,478 more rows]

## Sheet: S7
Supplementary Table S7: Ligand Receptor interaction activities on the niche in the AD dataset
Ligand-receptor	Niche1	Niche2	Niche3	Niche4	Niche5	Niche6	Niche7	Niche8	Niche9	Niche10	Niche11	Niche12
Wnt3_Fzd6	0	0	0.00274919	0	0	0	0	0	0	0.545566	0	0
Wnt3_Fzd1	0	0.00677888	0	0	0	0	0	0	0	0.442717	0	0
Wnt3_Fzd8	0	0	0	0	0	0	0	0	0	0.343672	0	0
Efnb2_Ephb6	0	0	0	0.342767	0.136843	0	0	0	0.0964693	0	0.320818	0.00342268
Efnb2_Ephb1	0	0	0	0.650747	0.106375	0	0	0	0.0687553	0	0.0168082	0
Shh_Ptch1	0	0.0333436	0	0	0	0	0.372257	0	0.0461068	0	0	0.0323343
Efnb3_Ephb1	0	0	0	0.969931	0.00559437	0	0.0829154	0	0.0362163	0	0	0
Sst_Sstr3	0	0.00708023	0	0	0	0	0.00916129	0.0220847	0.0344431	0	0.135147	0.0685838
Sst_Sstr2	0	0	0.00086241	0.0334269	0	0	0.11042	0	0.0650524	0	0.169243	0
Trh_Trhr	0	0	0	0	0.0011454	0	0.0827374	0	0.000175648	0	0	0
Wnt2_Fzd3	0.00986563	0	0	0.0747419	0.089095	0.00146343	0	0	0.0235737	0	0.00777519	0.0137733
Calm3_Kcnq3	0	0.00303547	0.000136835	0	0	1.54984	0.0169014	0.00101649	0	0.0213887	0.000197215	0
Vip_Vipr1	0	0	0	0	0.00786792	0	0	0.0177519	0	0	0.149503	0
Nts_Ntsr1	0	0.00556758	0	0	0	0	0.291906	0	0	0	0	0
Nts_Ntsr2	0	0.047345	0	0	0	0	1.11111	0	0.0679495	0	0	0.0942598
Ccn2_Fgfr2	0	0	0.00934311	0.513311	0	0	0	0	0	0	0.0249725	0
Sema4d_Plxnb1	0.00988179	0.0245911	0.00688186	1.06289	0.0137601	0.0151833	0.17888	0.018267	0.0026948	0.0515617	0	0
Thbs4_Notch1	0	0	0	0.310004	0	0	0	0	0	0	0	0
Fgf9_Fgfr3	0	0.505901	0.00157347	0	0	0	0	0.0223884	0	0.23421	0	0
Il33_Il1rap	0	0.0140759	0.0139505	0.582704	0	0	0	0.0228987	0	0.154123	0	0
Slit1_Robo2	0	0	0.00582808	0.0117134	0	0.0214985	0.203902	0.0016512	0	0	0.217073	0
Slit1_Plxna1	0	0	0	0	0	0.00147738	0.344308	0	0	0	0.163053	0
Mdk_Ptprz1	0.012727	0.101223	0.0885002	0.701356	0.00344407	0	0.770992	0	0.0191872	0.113063	0	0.0835195
Efna3_Epha10	0.0107188	0.00722263	0.00127	0	0.007881	0	0.0913411	0.0482341	0.0462128	0.0317489	0.12247	0.0275881
Efna3_Epha7	0	0	0.0142183	0.00961976	0	0.0916727	0.0841252	0	0	0.164097	0.177624	0
Sema3c_Nrp2	0.00266032	0	0	0	0.00459517	0	0.263489	0	0.00574155	0	0	0.0809413
Rspo1_Lrp6	0.0104801	0.00331096	0	0	0.030618	0.00440037	0.00205307	0.00920351	0	0	0.0382339	0.00455951
Cort_Sstr3	0	0	0	0	0	0	0	0.0141218	0	0	0.0452179	0
Cort_Sstr2	0	0	0.000434387	0.0126734	0	0	0	0.0120283	0.00318066	0	0.080325	0
Bmp3_Acvr2a	0	0	0	0.0521676	0.00126312	0	0.00607189	0	0.0161207	0	0.169929	0
Npy_Npy1r	0	0	0	0	0.0300683	0	0	0.0218221	0	0	0.113412	0.0280374
Npy_Fap	0.00375625	0	0	0.0288309	0.00433341	0	0	0	0	0	0.0612266	0
Tgfa_Erbb3	0	0	0	0.574273	0.00414564	0	0	0	0	0.0142504	0	0
Rtn2_Rtn4r	0	0	0	0	0.00342286	0	0	1.65898	0	0.00878678	0.0293158	0
Fgf13_Fgfr3	0.00323103	0.4336	0	0	0	0.0122912	0	0.0219075	0	0.0587082	0.150107	0
Inha_Acvr2a	0	0	0	0	0.0586655	0.0085805	0.268285	0	0.0571007	0	0.12299	0.0119367
Fgf1_Fgfr2	0	0.0685877	0.061861	1.00246	0	0	0.122654	0	0	0.0966234	0	0
Fgf1_Fgfr3	0	0.541053	0	0.208305	0	0	0.176374	0	0	0	0	0
Calm2_Kcnq3	0	0	0	0.000772521	0.013836	1.61036	0	0	0	0	0.00548848	0
Nlgn2_Nrxn3	0	0	0	0	0.0201742	0	0	0.00765113	1.40941	0.548971	0.0714607	0
Nlgn2_Nrxn2	0	0	0	0	0.000795633	0	0.0115185	0.0148235	0.0225734	0.124937	0.0351461	1.82026
Pnoc_Oprl1	0	0.00536762	0	0	0	0	1.25462	0	0.0885711	0.103786	0	0
Hcrt_Hcrtr1	0	0	0.00302381	0	0	0	0.105019	0	0.000914495	0	0	0.0116777
Bdnf_Sort1	0	0	0.00886895	0	0	0.00262796	0.159417	0.00389031	0	0.163462	0.598965	0
Nlgn3_Nrxn1	0.772554	0	0.00138148	0	0	0	0.054797	0	0.144828	0.541577	0	0
Nlgn3_Nrxn3	0.0390649	0	0	0	0	0	0	0	1.18259	0.521256	0	0
Nlgn3_Nrxn2	0	0	0	0	0	0	0.0739801	0	0.0173297	0.226973	0	2.22289
Slit3_Robo3	0	0	0	0	0.00347073	0	0.00163734	0.0129839	0	0	0.069037	0
Slit3_Robo2	0.0260403	0	0	0.0640701	0.0415258	0.0148991	0	0	0.010525	0	0.108382	0
Nlgn1_Nrxn1	0.594117	0	0	0	0.0222129	0	0	0	0	0	0.187917	0
Nlgn1_Nrxn2	0	0	0	0	0.00864193	0	0	0	0	0	0.118409	1.90183
Psen1_Ephb2	0	0.00048023	0.0179788	0.00757365	0	0	0.0741179	0	0.0290019	0	0.0754688	0
Psen1_Erbb4	0.00439474	0.00339366	0.0223871	0.0709607	0.00484638	0	0.0326388	0	0.0548731	0	0.117499	0
Sema6c_Plxna1	0	0	0	0	0	0	0.488229	0.0212597	0.054246	0.0831516	0.141073	0.0650413
Nxph1_Nrxn3	0	0.0521185	0	0	0	0	0	0	0.867781	0	0	0
Slit2_Plxna1	0	0	0	0	0	0	0.35255	0	0.0257108	0	0.147729	0.0462273
Col9a3_Mag	0	0	0.0225008	0.804663	0	0	0.00497185	0	0	0.100971	0	0
L1cam_Cntn1	0.0944668	0.0616993	0.0137089	0.0320214	0.0430751	0.0552984	0.837167	0	0.266489	1.1757	0.0668832	0.152377
Inhba_Acvr1b	0	0	0	0.0983933	0.0694263	0.00872598	0	0	0.00107353	0	0.189759	0
Lgals8_Itga3	0.00502702	0.0146764	0.000330388	0	0	0.00138797	0.330207	0.0120987	0.033746	0.415623	0	0.0306631
Sema3f_Plxna3	0.0104545	0.0072483	0	0.0272473	0.00759699	0	0.263228	0.000526492	0.0310557	0	0	0.0240736
Igf1_Igf1r	0.00729626	0.0297676	0.035852	0.00483018	0	0.00894864	0.00384516	0.0296366	0.0202388	0.34515	0	0
Selplg_Vsir	0	0	0.227474	0.0642666	0.0453693	0.0120471	0	0	0	0	0.0213313	0.000692139
Cthrc1_Fzd6	0	0	0.0310808	0	0	0	0	0	0	0.829341	0	0
Nptx2_Nptxr	0	0.0028932	0	0	0.0189184	0	0	0.0455747	0.00964867	0.0764273	0.554277	0.0339794
Nptx1_Nptxr	0	0	0.00882808	0	0	0	0.155396	0	0	0	0.767576	0
Reln_Itga5	0	0	0	0.0830588	0.0440609	0	0	0	0	0	0	0
Adam17_Itga5	0	0	0.00613574	0.108356	0.0255262	0	0	0	0	0.0126629	0	0
Sema6d_Trem2	0	0	0.513772	0	0	0	0	0	0	0	0	0
Apoe_Trem2	0	0	0.620299	0	0.0110519	0	0	0.00715507	0	0	0.0550717	0
Pdyn_Oprk1	0	0	0	0.0283675	0.0594018	0	0.0584648	0	0.0325914	0	0	0
Efna3_Epha4	0.0362438	0	0	0	0.039228	0.15274	0	0.00900024	0.0370217	0.779566	0.36575	0
Sema3a_Plxna2	0	0	0	0.0312805	0.0384259	0	0	0	0.0477855	0	0.161714	0.0300605
Inhba_Acvr1c	0	0	0	0.0775274	0.0602065	0.017634	0	0	0	0	0.0510107	0
Cx3cl1_Itgav	0	0	0.0187502	0	0.863651	0	0	0.0191453	0	0.239779	0.0323052	0
Ccn1_Itgav	0	0	0	0	0.212391	0	0	0	0	0	0.115197	0
Mfge8_Itgav	0	0	0	0.0666254	0.972769	0	0.0960511	0	0	0	0	0
Adam10_Tspan5	0.0480337	0.00369719	0.107363	0.756823	0	0	0	0.00335656	0.204178	0.15965	0.642597	0
Tac1_Tacr3	0	0	0	0.017011	0.0124492	0	0.137198	0	0.00841854	0	0	0
Tac2_Tacr3	0	0	0	0	0	0	0.238299	0	0	0	0	0
Tac1_Tacr1	0	0	0	0.0826346	0.0377884	0	0.0718762	0	0.019623	0	0	0
Tac2_Tacr1	0	0	0	0	0	0	0.0895287	0	0.00647703	0	0	0
Nrtn_Ret	0	0.026672	0.00558002	0	0	0	0.00530929	0	0	0.557136	0	0
Shank3_Ret	0	0.0239011	0	0	0	0	0	0	0.0193835	0.797877	0	0
Adam17_Cd9	0	0	0.172246	1.17021	0.00383913	0	0	0.00133403	0	0.324558	0	0
Sema6d_Tyrobp	0	0.0591452	0.498665	0.48131	0	0.00448567	0.264259	0.011559	0	0.369095	0	0
Cck_Cckbr	0	0	0	0	0.0352365	0	0	0.0486339	0	0	0.386423	0
Ntf3_Ntrk3	0	0	0	0	0	0	0.0496016	0	0	0	0.114116	0
Bdnf_Ntrk3	0	0	0	0	0	0	0.210214	0	0	0	0.553478	0
Ccl27a_Ackr2	0.00204221	0	0	0.0240556	0.030852	0	0	0	0	0	0.0324238	0
Omg_Lingo1	0.069763	0.0694545	0.0428899	0.161379	0.0389926	0	0.0297232	0.113118	0.116795	0.895968	0.744709	0
Rtn3_Rtn4r	0	0	0	0	0	0	0.0293681	1.43694	0	0	0	0
Omg_Rtn4r	0	0	0	0.0212109	0	0	0	1.66324	0	0	0	0
Rtn4_Rtn4r	0	0	0	0.0198094	0	0	0	1.61904	0	0	0	0
Calm1_Kcnq3	0	0	0	0	0	1.72167	0	0	0	0.0597464	0	0
Adcyap1_Adcyap1r1	0.0179482	0.0254417	0	0	0	0	0.574296	0	0	0	0	0.161008
Ncam1_Fgfr1	0	0	0	0.399332	0	0	2.20734	0	0	0	0.112458	0
Fgf12_Fgfr3	0.00276845	0.639765	0	0	0.00941038	0.00845409	0	0.0575552	0.0164247	0.0521564	0.163228	0
Spp1_Itgb1	0	0.0488534	0.0678612	0.131177	0	0	0.0141928	0	0.0171321	0.0245716	0	0
Omg_Rtn4rl1	0	0	0	0	0.0356116	0	0	0	0	1.69527	0.413419	0.0335303
Ngf_Sort1	0	0	0.0426613	0.0976744	0	0	0	0.0260186	0	1.2312	0.0957856	0
Nxph1_Nrxn2	0	0.0297744	0	0.00803816	0	0	0	0	0.0578106	0	0	0.993498
Slit2_Robo3	0	1.67681e-05	0	0	0.0220801	0	0	0.0225976	0	0	0.170395	0
Sema6b_Plxna4	0.00509698	0.00175199	0	0	0.02162	0.0401061	0.372423	0.0297698	0.0190476	0.228946	0.211795	0
Slit2_Robo2	0.00530991	0	0	0.0185326	0.00939298	0.000704674	0.056111	0	0.024667	0	0.100663	0.0241358

## Sheet: S8
Supplementary Table S8: Estimations of cell type-specific gene module proportions in the AD dataset
Barcode	Astro	BCell	CA	DG	Endo	L2/3 IT CTX	L4 IT CTX	L4/5 IT CTX	L5 IT CTX	L5 PT CTX	L5/6 IT CTX	L5/6 NP CTX	L6 CT CTX	L6 IT CTX	L6b CTX	Lamp5	Macrophage	Microglia	Neutrophil	Oligo	Pvalb	Sncg	Sst	Sst Chodl	SUB	TCell	Vip
AAACAAGTATCTCCCA-1	0.248668	0	1.13461e-06	0	0.00269683	0	1.87629e-07	7.85617e-09	6.26269e-07	0	0	0.0115657	0.0102164	0	7.52933e-06	0	0	0.0485782	0.0593584	0.51817	0.0122399	0	0	0.0443463	0	0.0204231	0.0237274
AAACACCAATAACTGC-1	0.170674	0.000331806	0	0	0.00555612	0.00298343	0	0	0.0651784	0.0531347	0.104866	7.60065e-07	0.27096	0.0879761	0.00429061	0	0.0118699	0.000932283	0.0431831	0.0403749	0.0833324	0	0	0.00800194	0	0.0243341	0.0220195
AAACAGAGCGACTCCT-1	0.255705	0	0.0542578	0.0419667	0.0088656	0.024069	0	0	0	0.0303607	0	0	0	0.0100414	0.0118826	0.014274	0	0.0165154	0	0.109643	0.020516	0.0138613	0.0586527	0.237147	0.0178676	0.0587355	0.0156381
AAACAGCTTTCAGAAG-1	0.180347	0	0	0	0.0104033	0.0917559	0.303104	0.124647	0.0429713	0	0.0626048	0	0	0	0.00437539	0	0.0123462	0	0.0192035	0.0327948	0.0493518	0	0.0244046	0.02055	0	0.011103	0.010037
AAACAGGGTCTATATT-1	0.13331	0.00615303	0.0416417	0.0193302	0.00572078	0	0.0747249	0	0.0833365	0.058049	0.0715161	0.0273233	0.0613632	0.000405664	2.11295e-05	0.00591053	0	0.00131577	0	0.140808	0.103153	0.0208557	0.0261172	0.0387332	0.0334917	0.0467184	0
AAACCGGGTAGGTACC-1	0.246911	0.00295078	0.45737	0.0464331	0.0205867	0	0	0	6.46227e-08	6.20128e-07	0.0144444	0	0.00362353	0.00601166	0	0.00165196	0.0142064	0.027424	0.0171181	0.043767	0.0169575	0.00822368	1.4115e-05	0.0325688	0	0.0314776	0.00825863
AAACCGTTCGTCCAGG-1	0.147087	0	0.0372774	0.566758	0.00709475	0.00476977	0.0206111	0.0386833	0.00810218	0.000318609	0.00311783	0	0	0.0170274	0	0	0.0050409	0	0.014932	0.0218796	0.0258207	0.0101609	0.0375363	0.0031272	0	0.0306546	0
AAACCTCATGAAGTTG-1	0.138883	0.0091953	0.047028	0.0148187	0.0133411	0.0448289	7.35499e-06	0	0.0128095	0.0159011	0.165343	0	0.198777	0.0683803	0.024918	0.00162086	0	0.0313742	0.0398673	0.0653034	0.0504257	0.00164622	0.0308514	0.0246787	0	0	0
AAACGAAGAACATACC-1	0.22459	0.0100746	0.111127	0.108279	0.0233664	0.150962	0	0.0126608	0	0.0119804	0	0	4.39383e-05	0	0	0.0236804	0	0	0.0287322	0.0726271	0.0357773	0	0.0322986	0.0742317	0.0166314	0.043375	0.0195611
AAACGAAGATGGAGTA-1	0.314134	0.000423759	1.66842e-07	8.18989e-07	0.0362173	0.272056	0.0674618	3.58846e-06	0.00592028	0	0.026217	0.00669211	0	0.0258533	3.57981e-06	0.0293289	0.0298605	0.00422712	0.0330713	0.0330896	0.0477105	0.00519316	0.0036844	0.0367547	0.00491766	0.0108248	0.00635368
AAACGACAGTCTTGCC-1	0.281316	0	0.00279783	0	0.0585447	0.0477702	0	0	0	0.073372	0	0.00599786	0.0323735	2.18662e-05	0	0	0.094604	0	0.0305658	0.0331468	0.0681473	0.0330644	0.0127022	0.121377	0.0108942	0.0597071	0.033598
AAACGAGACGGTTGAT-1	0.255944	0	0	0	0.0198953	0.0161213	0.0471203	0	0.00187961	0	0	0.0111416	0	0	0	0.0143818	0.0248379	0.113844	0.0387875	0.1735	0.170359	0	0	0.0273073	0.0631461	0.0217342	0
AAACGCCCGAGATCGG-1	0.203424	0.00197175	0.00901034	0.0587797	0.00990984	0.0325913	0.0283515	0.00657416	0	0.0385479	0	0.0105495	0.00490968	0.0143546	0.0127875	0.0264829	0	0.00471303	0	0.0581598	0.0658376	0.0284111	0.0512615	0.240207	0.00948064	0.0600721	0.0236122
AAACGGGTTGGTATCC-1	0.185219	0.00380717	9.62987e-06	0	0.00768457	0.224844	0.131265	1.99678e-05	0.0320768	0.00723022	0.114246	0	0.000125504	9.59888e-07	0	0	0.00275909	0.0113018	0.00649463	0.0276764	0.0882909	0	0.0733383	0.0527434	0	0.0290892	0.00177823
AAACTAACGTGGCGAC-1	0.169402	0.00828704	0.0262169	0.00012382	0.00931418	0	0	0	7.43166e-06	0.0132037	0	0.00878477	0.00980143	0	0	0.00435088	0	0.0210473	0.00962387	0.121335	0.186454	0.0149217	0.0770439	0.286662	0.00946074	0.0100156	0.0139436
AAACTCGGTTCGCAAT-1	0.299375	0.00531048	0.000394187	4.79581e-07	0.0271569	0.00589041	0.0284178	0.00346577	0.0296797	0	0	0	0	0	0.0120626	0	0	0.00553353	0	0.162237	0.13748	0.022685	0.0400902	0.132752	0.0513784	0.0360905	0
AAACTCGTGATATAAG-1	0.289362	0	0.0267204	0.000484331	0.0122157	0	0.00779087	0	0	0.00448872	0	0.00416611	0	0.00255116	0.0338834	0.0132988	0	0.00605905	0.00996828	0.0863892	0.0527588	0	0.0797576	0.228494	0.038301	0.0624582	0.0408528
AAACTGCTGGCTCCAA-1	0.243443	0	0.0197875	0.0307504	0.0252361	0	0.0764418	0	0.0035502	0	0	0.0215331	0	0	0	0	0.0406914	0.0338562	0.0545053	0.122826	0.199941	0	0	0.00600002	0.0776826	0.0206635	0.0230926
AAACTTAATTGCACGC-1	0.207015	0	4.25483e-07	0.0104121	0.0167872	0.369894	0.174108	0	0.00793596	0	0.0177349	0	0	0.0313145	0	0	0	0	0	0.0343369	0.0506831	0	0.00880492	0.0204158	0	0.0505564	0
AAACTTGCAAACGTAT-1	0.190124	0.00494915	0.145889	0	0.010556	0.0062944	0	0	0	0	0.0825784	0	0.151613	0.0307761	0.0732633	0	0	0.0259691	0.0349733	0.199245	0.0262348	0	0	0.0175345	0	0	0
AAAGACATGAAGTTTA-1	0.162681	0	0.184767	0.0429691	0.0069999	0.113358	0	0.00517166	0	0.0115142	5.55857e-06	0.0122703	0.0326524	0.0370099	0.0217909	0.0116586	0	0.0339453	0.0341017	0.0182108	0.0894163	0	0.00716011	0.117487	0.0135206	0.0433101	0
AAAGACCCAAGTCGCG-1	0.167471	0.00569221	0.119784	0.130825	0.0136269	0.172529	0.0110751	0	5.52291e-06	0.0196785	0.000883404	7.59772e-07	0.0107102	0	0	0.000851114	0	0.031696	0	0.0655908	0.0341855	0.0262787	0.052427	0.0780633	0.0106103	0.0480159	0
AAAGACTGGGCGCTTT-1	0.201965	0.00668092	0	0.00722339	0.0160731	0.017378	0.261422	0.0864449	0.067279	0.0208177	0.0584061	0	0.00268035	0.0109277	0	0.00721014	0	0.00231233	0.0169546	0.0376676	0.125971	0	0.0279736	0.00161109	0	0.0230022	0
AAAGGCCCTATAATAC-1	0.12078	0.0125499	0.00460397	0.00966576	0.0117688	0.0189556	0.00495155	0	0.0169826	0	0.091635	0	0.308254	0.139291	0	0	0	0.0205271	0.0230304	0.0427909	0.0798026	0	0.0534217	0.019223	0	0.0217664	0
AAAGGCTCTCGCGCCG-1	0.214292	0.00355326	0.0354797	0.031523	0.0116818	0	0.0414191	0.0720235	0.026374	0	0	0.0383089	0	0	0	0.00974129	0	0.0244222	0.011636	0.13013	0.159799	0.0119521	0.0452422	0.0356271	0.0650577	0.031737	0
AAAGGGATGTAGCAAG-1	0.155932	0	0.00471308	0.0092056	0.0193197	0	0	0	0	0	0	0	0	0	0.0236689	0.0092167	0	0.00292865	0	0.365861	0.242256	0.0051578	3.55599e-05	0.0771041	0.029077	0.0555244	0
AAAGGGCAGCTTGAAT-1	0.162097	0	0.0205174	0	0.0118494	0.00606333	0.0019416	0.00902667	0	0	0.26268	0	0.149058	0.0424804	0	0	0	0	0.0379689	0.0913875	0.101551	0.0241578	0.0128327	0.0303634	0	0.036025	0
AAAGGTAAGCTGTACC-1	0.269137	0.020649	0	0.0153153	0.018245	0	0	0	0	0	0	0	0	0	0	0.0249842	0	0.00653035	0	0.137146	0.1499	0.0123122	0.0478517	0.231695	0.0308045	0.0294457	0.00598397
AAAGGTCAACGACATG-1	0.165635	0	0.0695793	0.0921884	0.00407367	0.1522	0.000269806	0.0370947	0	0.0316265	0	0.018214	0.0555824	0	0	0.010842	0	0.00377488	0.0122473	0.0371785	0.0885284	0.058559	0	0.135298	0.0271079	0	0
AAAGTAGCATTGCTCA-1	0.124159	0	0.498094	0.129318	0.00193911	0.00212433	0.00657909	0	0.00816003	5.34774e-05	2.55889e-05	0	0	0.0155632	0	0.00454493	0.000351831	0	0.008709	0.0210407	0	0.00704798	0	0.0221839	0.0775359	0.067991	0.00457923
AAAGTCACTGATGTAA-1	0.240315	0	0.109134	0.052963	0.0094075	0.170503	0	0	0	0	0.00317938	0	5.99344e-06	0	0.0148189	0.030334	0	0.00308856	0.0264003	0.201651	0.0605226	0.0100899	0	0.0401676	0	0.0274186	0
AAAGTCGACCCTCAGT-1	0.204178	0	0.0491867	0	0.0086813	0.0164637	0.0336139	9.42566e-06	0.0835908	0.166683	0.0855723	0.00786894	0.0131027	0	0	0	0	0.0326541	0.0387359	0.0771218	0.0736243	0.00783177	0.0309532	0.0230881	0.0340617	0.0129782	0
AAAGTGTGATTTATCT-1	0.331756	0	0.0087367	0	0.0342787	0	0.0421445	0.0062593	0	0.0181969	0	0	0	0	0	0	0	0.0364232	0	0.268153	0.1133	0	0	0.0720227	0.0269994	0.0417291	0
AAAGTTGACTCCCGTA-1	0.256054	0	0	0	0.0112916	0.00358402	0.0120536	0.0201835	0	0.00274392	0	0.00632259	0	0	0.0311093	0.00852217	0.00990819	0	0.0226302	0.160347	0.194327	0.0264149	0	0.113459	0.0642158	0.0339756	0.0228574
AAATAACCATACGGGA-1	0.169665	0	0.0579366	0.0397459	0.0155538	0.029855	0	0.00953323	0	0.0541935	0	0.0219315	0.000175085	0.0151822	0.00824627	0.0365607	0.0171772	0.00891939	0.0323417	0.227207	0.0355265	0.00971375	2.85985e-06	0.149507	0.028895	0.0321309	0
AAATAAGGTAGTGCCC-1	0.31623	0.000426355	0	0.0332881	0.00714592	0.0252029	0.00639306	0.0263605	1.07659e-05	9.93544e-06	0	0.0108359	0.0218116	0	0.0141613	0.00600628	0	0.0067116	0.0175344	0.120412	0.0362506	0	0.0518753	0.207638	0.0439038	0.0477923	0
AAATACCTATAAGCAT-1	0.30371	0	0.00871609	0.0343657	0.0136189	0	0.0738261	0.0220376	0.00749574	0.0159382	0	0	0.00177999	0	0	0	0	0.0643449	0.0311138	0.152594	0.201858	0	1.18154e-06	0.00806962	0.051398	0.00913292	0
AAATAGCTTAGACTTT-1	0.259775	0.00293968	0.00504587	0	0.0235554	0	0	0.00923117	0.00350972	0.0035068	0.0294341	0	0	0.0141727	0	8.7808e-07	0	0.0145698	0	0.115808	0.0985246	0.0112139	0.020818	0.230767	0.0853598	0.0717675	0
AAATAGGGTGCTATTG-1	0.30918	0	0.005799	0.01907	0.0104556	0	0	0	0	0.00567728	0	0	0.0338862	0	0.0118193	1.95945e-07	0.00689676	0.00468273	0.033218	0.141156	0.274731	0	2.56002e-06	0.0787711	0.00294171	0.0192048	0.0425071
AAATCGCGGAAGGAGT-1	0.260166	0	3.94111e-06	0.0332824	0.00575607	0.352516	0.0850758	0	2.94843e-06	2.86557e-06	0.0276925	0	0.00228555	0.0302869	0.0053712	0.0319389	0.0149422	0	0	0.0142087	0.0185711	0.00472987	0.00129188	0.0353925	0	0.0526802	0.0238027
AAATCGTGTACCACAA-1	0.215853	0	0.0169778	0.00943484	0.0114121	0	0.0545544	0.0264563	0.0113693	0	0.00326857	0	0	0.0198403	0	0.019739	0	0.118869	0.0465538	0.147088	0.189569	0	0	0	0.0711896	0.0378259	0
AAATGATTCGATCAGC-1	0.352938	0	0	0.0316481	0.0105178	0	0	0	0	0	0	0.0218681	0.0301618	0	0.0092366	0	0	0.00112183	0.0179218	0.098584	0.0829876	0.0124029	0.0498574	0.197382	0.0330962	0.0502758	0
AAATGCTCGTTACGTT-1	0.229833	0	0	0.000382482	0.0130456	0.0103126	1.05751e-05	0.00971245	0.076404	0.114246	0.142224	0.0303611	0.0253321	0	0	0.00300431	0	0.0709794	0.0334164	0.061031	0.111579	0.00372959	0.0190901	0.0153877	0.00314376	0.0240881	0.00268651
AAATGGCATGTCTTGT-1	0.163822	0.00384023	0.0853142	0.0867938	0.0107313	0.119739	0	0.0214624	0	0.0121968	0	0	0	0	0	0.0150815	0	0	0.0300235	0.258449	0.0630774	0	0.0102715	0.0719192	0.0198908	0.0273871	0
AAATGGCCCGTGCCCT-1	0.174186	0	0.0650966	0.0125684	0.02702	0	0.0128926	0	0.0355881	0.000948104	0.0868401	0	0.181045	0.0953358	0.0344562	0.024495	0	0.0572013	0	0.0863968	0.0265051	0	0	0.0239459	0	0.0554792	0
AAATGGTCAATGTGCC-1	0.297959	0	0.0297821	0.00679086	0.0201295	0	0.0366223	0.0305802	0	0.014132	0	0.0107499	0	0.00377158	0	0.00885362	0.00768059	0.0151882	0.0123366	0.131668	0.202094	0	0.0186121	0	0.110116	0.033078	0.00985564
AAATGTGGGTGCTCCT-1	0.234286	0	0.00956677	0.0544125	0.0232063	0.0761757	0.00189777	0	0	0	0.0135808	0	0	0	0.0243502	0.00601308	0	0.0156018	0.0309886	0.366713	0.0174058	0.00272892	0.0169848	0.0602469	0.00756557	0.0201387	0.0181362
AAATTAACGGGTAGCT-1	0.274643	0	0	0.00141953	0.0308268	0	0.0354226	0	0	3.96808e-07	0.0181024	0	0	0	0	0.00085479	0.0114458	0.0203386	0.0446178	0.121049	0.248317	0	0	0.0191485	0.0977334	0.0480834	0.0279969
AAATTACACGACTCTG-1	0.241906	0	0.0658063	0.0777113	0.00428189	0.0466866	0	0	0	0.0540184	0	0	0.0107656	0.0326948	0	0.0239974	0	0.00162676	0.00177707	0.0547631	0.0546538	0.0136791	0.0311295	0.200038	0.033458	0.0510063	0
AAATTACCTATCGATG-1	0.363469	8.57463e-07	0.00241123	0.0115413	0.0165055	0.000449502	0.00888686	0	0	0	0	0.0121527	0	0	0.00477066	0	0	0.0623415	0.0282789	0.183386	0.0864908	0.0136872	0.0125523	0.137309	0.0216502	0.0341166	0
AAATTGATAGTCCTTT-1	0.246185	0	0.0928504	0.130396	0	0.0200746	1.95096e-05	0	0.0243078	0.0223681	0.0125957	0	0.0265091	0.0507832	0	0	0	0.108515	0.0372029	0.031818	0.0383875	0.0406869	0	0	0.0846688	0.0326309	0
AAATTGCGGCGGTTCT-1	0.138315	0	0.00780765	0.00699122	0.00687802	0.484942	0.0543644	1.03368e-05	0.00402577	1.76669e-06	0.0938841	0	1.09873e-05	0	0.00257499	0	0	0.016369	0.022809	0.0300097	0.0644561	0.000846727	8.20692e-06	0.0194659	0.00399964	0.0284705	0.0137583
AAATTTACCGAAATCC-1	0.271154	0	0.183613	0.0806133	0.00820482	0.0764867	0	0	0	0.0164674	0	0	0.00753825	0	0	0.0215646	0	0.00507104	0.00968926	0.0137199	0.0487015	0.0102096	0.0173515	0.140077	0.023227	0.0663105	0
AAATTTGCGGGTGTGG-1	0.389015	0.0139064	0.0565464	0.275305	0.0338051	0.000477872	0.0170686	0	0	0.000227693	0.0132936	7.74239e-06	0	0.0249232	0	0.0155812	0.00378841	0.00900627	0.0258924	0.0511872	0.0145488	0.00771284	0.00741437	0.00828192	0	0.0320059	3.37051e-06
AACAACTGGTAGTTGC-1	0.34385	0	0.028247	0	0.0833203	0	0	0	0	0	0	0	0.00336018	0.00175251	0	0	0	0	0.170626	0.296713	0.0292328	0	0	0.0125603	0.0152119	0.0151252	0
AACAATACATTGTCGA-1	0.174131	0	0	0.0496333	0.0125779	0	0.00553031	0	0	0	0.0508923	0.071709	0.0738624	0.0217798	0.0073086	0.00402328	0	0.0412606	0.0315067	0.120968	0.0609727	0	0.0855627	0.0528058	0.106407	0.0241281	0.00494026
AACAATTACTCTACGC-1	0.191507	0	2.64887e-05	0.0287064	0.00644545	0	0	0	0.0328962	0.0050743	0.186077	0	0.288999	0.0494995	0.0152093	0.0215683	0	0.00502544	0.0399219	0.0634291	0.0310595	0	0	0.00660177	0.00616771	0.0217855	0
AACACACGCTCGCCGC-1	0.406097	0	0	1.05785e-08	0.0181742	0	2.12414e-07	1.64037e-07	2.0224e-07	0.00954676	0	0.0226321	0.0078667	0	0	0.0157627	0	0.046484	0.0435179	0.191194	0.155302	0.00399441	0.00975123	0.0492725	0.0105067	0.000897035	0.00900028
AACACGACTGTACTGA-1	0.255012	0	0.0630736	0.037336	0.0532835	0.0784543	0	0	0	0	0	0.0182923	0.00372063	0	0	0	0	0.00291989	0.0375684	0.272877	0.0245114	0	0.0284979	0.0981036	0	0.0263499	0
AACACGAGACGCGGCC-1	0.223654	0	0.216576	0.0193089	0.0120183	0	0.00195839	0	0	0	0.0322981	0	0.0504909	0	0	0	0	0.079415	0.0481154	0.244927	0.0122841	0.00800941	0.0140458	0.00914072	0	0.0277569	0
AACACGCGGCCGCGAA-1	0.148743	0	0.000209006	0	0.0113493	0.00628983	0	0	0	0	0.100062	0.0268435	0.231132	0	0	0	0.00515464	0.0679676	0.0433578	0.191067	0.0899482	0.00215922	0.0205294	0.0288169	0	0.0263702	0
AACAGCTGTGTGGCAA-1	0.142061	0.000787613	0	0.0536149	0.0209636	0	0	0	0	0	0.000244555	0.126004	0.0796184	0.00298217	0.040786	0	0.00368557	0.0717291	0.0359369	0.0693634	0.15209	0.00164623	0.0375467	0.0244492	0.099583	0.0275632	0.00934492
AACAGGAAATCGAATA-1	0.234907	0	0.0456585	0.0742899	0.0118668	0.109651	0	0	0	0.000549168	0	0	0	0	0	0.00351367	0	0.00433665	0.0103647	0.341149	0.0317758	0	0.0120951	0.0542667	0.00997382	0.0438629	0.0117398
AACAGGATGGGCCGCG-1	0.233133	0	0	6.90782e-07	0.034428	0	0.0109355	0	0.00506419	0.00311965	0.024909	0	0.0380894	0	0.0211148	0	0	0.00186213	0.0882986	0.47406	0	0	0.00737331	0.0576127	0	0	0
AACATATCAACTGGTG-1	0.279412	0	0	0.0172171	0.0332054	0	0	0	0.0126604	0	0	0.0335289	0	0	0.0132718	0	0	0	0	0.144756	0.119734	0.0165551	0.0364115	0.205505	0.0368132	0.0496146	0.00131508
AACATCGATACGTCTA-1	0.246415	0	0.00711353	0.00699073	0.0127574	0	0	0.00644414	0	0.0314804	0	0	0.00934415	0.0211373	0.0402566	0.0233801	0	0.00516802	0	0.0574559	0.0505374	0.0171132	0.0675747	0.267397	0.0471897	0.0483447	0.0339002
AACATTGAAGTTGATC-1	0.136778	0.00540335	0.0152961	0.0100269	0.0179164	0.0338022	0.0230741	0.00719623	0.0419786	0.000234202	0.0775438	0	0.268294	0.145518	0	0	0	0.0121501	0.0166707	0.0529742	0.0549477	0	0	0.02053	0.0148907	0.0361121	0.00866336
AACATTGGTCAGCCGT-1	0.195211	0	0.0405833	0	0.0200381	0.419362	0	9.07831e-06	0.0321974	0.00834004	0.0464462	0	0	0	1.48168e-06	0.0219738	0	0.0127915	0.0247128	0.0201724	0.0334702	0.00427963	0.0266138	0.0433167	7.45553e-06	0.0339578	0.0165154
AACCAAGACTTCTCTG-1	0.147014	0	0.0859722	0.0247655	0.01454	0	0	0	0	0	0.0316753	0.0168079	0.0980888	0.0158338	0.0321669	0	0	0	0.00456369	0.334282	0.035365	0	0.0340871	0.0827448	0	0.0420931	0
AACCAGTATCACTCTT-1	0.339245	0	0.171195	0.029487	0.00674044	0.0468506	0	2.12722e-06	0	0.0266999	0	0.0145005	0.00680486	0.00545216	0	0.00778659	0	0.0462406	0.0191597	0.0161667	0.0796284	0	0	0.0973132	0.00383715	0.082759	0.000131039
AACCATAGGGTTGAAC-1	0.16489	0.00958743	0	0.0245866	0.00792174	0.440313	0.0651774	0.0041539	0.0231409	0	0.00641824	0.00937204	0.0100899	0.0189795	0	0	0.00517948	0.00549145	0.0149024	0.0130997	0.0270157	0.00476095	0.0220583	0.00811764	0.00785923	0.0456982	0.0611868
AACCATGGGATCGCTA-1	0.182387	0.00911024	0.0122626	0	0.00658604	0	0	0	0.0314316	0.0174451	0.243521	0	0.14384	0	0.0136929	0	0.00864193	0.0151811	0.0461708	0.0940049	0.123527	0.00671849	0.00634762	0.0391322	0	0	0
AACCCAGAGACGGAGA-1	0.245231	0	0.0511333	0.0730888	0.0246976	0.0584018	0.0136811	0.0167779	0	0	0	0	0.0165863	0	0.0205324	0	0	0.00161255	0.0314233	0.316635	0.0293653	0.00378285	0.00840332	0.0599386	0.0155224	0.0131868	0
AACCCATCCCATGATC-1	0.116342	0.0242419	0.0166965	0.0190212	0.013187	0	0.102324	0.031083	0.0635546	0.186572	0.0296121	0.00897468	0.0399377	0	0	0	0.00943365	0	0.00889772	0.0526419	0.115506	0	0.0789836	0.0132205	0.0262128	0.0435566	0
AACCCGACAACCCGTG-1	0.287958	0	0.0508612	0.0449789	0.00984893	0.227583	0.0120537	8.73826e-07	0	0	0.0117139	0.0441491	0	0.0442406	0	0	0	0	0.0121182	0.042043	0.0415336	0.0268257	0.0116945	0.0220029	0.0191118	0.0379866	0.0532956
AACCCTACTGTCAATA-1	0.14692	0	0.0205719	0	0.0124265	0	0.0159541	0.00021882	0	0	0	0.0384239	0	0	0.0445548	0.0395726	0.00232576	0.00336486	0.00175767	0.0554861	0.236468	0.0175446	0.0313736	0.190042	0.0847522	0.058242	0
AACCCTGGTGGAACCA-1	0.21612	0.0115505	0.146676	0.104586	0.0143197	0.166924	0.0233529	0.0257591	0	0.00422412	0.00515752	0	0	0.00535712	0	0	0	0	0.0394139	0.0640923	0.0577291	0.00441949	0.0415862	0.0687324	0	0	0
AACCGAGCTTGGTCAT-1	0.232903	0	0	0	0.0200779	0	0.0250013	0	0	0	0	0.0221313	0.00193456	0	0.00874051	0.0163773	0	0.0114168	0.00952526	0.2105	0.334044	0	0	0.0729563	0.0035773	0.0308144	0
AACCGCTAAGGGATGC-1	0.279749	0	0	0	0.0240379	0	0.0278595	0	0.0169904	0.000748233	8.96985e-07	0.0125055	0	0	0	0.0015724	0.0106036	0.0309169	0.0642572	0.172371	0.221805	0.0148558	0	0.0542272	0.0214768	0.0232108	0.0228116
AACCGTTGTGTTTGCT-1	0.190843	0.00381577	0.142953	0.0971151	0.0103203	0.195898	2.27462e-05	0	0	0.0151531	6.22209e-06	0	0.00705043	0.00648945	0	0.0161573	0	0.00612307	0.00905806	0.0578481	0.0489568	0.00140167	0.0509008	0.0766984	0	0.0631895	0
AACCTAAAGCCGTCCG-1	0.287501	0.000974387	0.0672378	0.0992919	0.00822731	0.0518886	0.00270665	0.0140238	0.00553948	0	0	0.0100721	0.0815674	0.00678847	0.00187196	0.0211742	0.0121976	0.0048032	0	0.0188445	0.0357111	0	0.0187422	0.155128	0.0244627	0.0711636	8.23116e-05
AACCTCGCTTTAGCCC-1	0.32291	0	6.89006e-06	0	0.0523395	0	0.0110219	0.00610347	0	0	5.16044e-06	0.0612502	8.3049e-06	0	0.00614165	0.0185198	0	0	0.0693666	0.294403	0.0097267	0.00306821	0.0465523	0.044213	5.88457e-06	0.0543575	0
AACCTTTAAATACGGT-1	0.232111	0	0.0142509	0.0328066	0.0222786	0	0.0309935	0	0	0	0	0.0463099	0.00980993	0	0	0.0195457	0.00480132	0.0148551	0.0148538	0.12794	0.0771982	0.0229522	0.0946686	0.164661	0.0641309	0.0032109	0.00262187
AACCTTTACGACGTCT-1	0.271028	0.00285728	0.0744579	0.0327346	0.0142611	6.38699e-05	0	0.00343235	0	0.022352	0	0	0.0150884	0	0.0419467	0.0343213	0	0.00149002	0	0.0761933	0.0237741	0.00226285	0.0921732	0.195604	0.0354435	0.0441937	0.0163222
AACGAAAGTCGTCCCA-1	0.202198	0	0	0	0.0116445	0.383983	0.164747	0	5.21057e-07	0	0.0336664	0	0	0	0	0	0	0.0179974	0.00281553	0.0338864	0.0463256	0	0.0352454	0.00909476	0.011025	0.0473712	0
AACGATAATGCCGTAG-1	0.187096	0	0.0112703	0.00835285	0.0143876	0	0.03708	0	0	0	0	0	0	0	0.00744286	0.0118867	0	0.0121983	0.00859226	0.124289	0.11658	0.0245175	0.0585725	0.241072	0.0809149	0.0557475	0
AACGATAGAAGGGCCG-1	0.237499	0.0101199	0.136358	0.105009	0.0144302	0.188187	0.00346263	0.000439476	0	0.00913894	0.00723587	0	0.0226927	0	0	0.0116026	0	0	0.0128586	0.0719645	0.0592983	0	0.00925684	0.0616798	0.0156459	0.02312	0
AACGATATGTCAACTG-1	0.19587	0	0	0.00674807	0.0351201	0	0.00837406	0	0.00575992	0	0	0	0.000744971	0	0.0238831	0.016452	0	0	0.0316212	0.16863	0.34512	0	0.0285235	0.100807	0.0201823	0.0121644	0
AACGCATGATCTGGGT-1	0.234491	0.00498224	0.00695899	0.0438775	0.00693457	0	0	0.0107259	0	1.12683e-06	0.00640047	0	0.0119023	0	0.011341	0.0232415	0	0.0137344	0	0.101272	0.0696219	0.01352	0.0923126	0.260507	0.0403405	0.0478352	0
AACGCGAACGGCAACA-1	0.162972	0	0.0330341	0	0.0196978	0.0236771	0.124193	0.125281	0.147867	0.00841542	0.0809905	0	0	0	0	0	0.00721717	0.0206966	0	0.0458552	0.0903336	0.00199793	0.0460203	0.0214135	0.00623559	0.0341027	0
AACGCGACCTTGGGCG-1	0.337659	0	0	0.0133504	0.021895	0.075745	0.00918602	0	0	6.02393e-06	0	0.0264862	0	1.69248e-06	0	0	0	0	0.0675773	0.265122	0.0697704	0	0.0183877	0.0932494	0.000649657	0.00091394	0
AACGCGGTCTCCAGCC-1	0.221114	0	0	0	0.0391521	0	0.00771745	0	2.00893e-06	0.0135856	0	0.0169524	0	0	0.0095336	0.024764	0	0.00621158	0.00686567	0.301625	0.230409	0	0.00623964	0.0703573	0	0.0454705	0
AACGCTGTTGCTGAAA-1	0.431936	0	0	0	0.00640072	0	0.00912294	0	0.0036257	0	0.0030411	0	2.40937e-06	0	0	0.022091	0	0.0175351	0.0162068	0.310463	0.102326	0	0.00670291	0.0471676	0.0102789	0.0130995	0
AACGGACGTACGTATA-1	0.407881	0.000994813	0	0	0.021371	0	0	0	0	0.0119404	0	0.0276867	0	0	0.00625113	0.00760701	0	0.0305971	0.0216738	0.151723	0.172073	0	0.0233756	0.076836	0.0166415	0.0233484	0
AACGGCCATCTCCGGT-1	0.119383	0	0.177943	0.331459	0.00622225	0	0.00832461	0	0.0080098	0	0.00756778	0	9.70893e-05	0.0652225	0	0	0	0.0114814	0	0.0324525	0.0656084	0.0254919	0.0499204	0.0316665	0.00434353	0.0433704	0.0114363
AACGTACTGTGGGTAC-1	0.176256	0	0.0585627	0.402203	0.0131875	0.0427465	0.026706	0.0225502	3.02889e-05	0.00528776	1.41105e-06	0	0.00768798	0.00907813	0	2.47698e-05	0.015557	0.00308348	0	0.0335956	0.0910481	0	0.00413931	0.0267875	0.0122644	0.0492027	0
AACGTAGTCTACCCAT-1	0.124622	0	0	0	0.00463284	0	0	0	0.0144192	0	0.0503006	0	0.254656	0.122347	0.000499611	0.0311047	0	0.00564643	0.0152506	0.0856608	0.161096	0.0286147	0.0200846	0.0712567	0	0.00980733	0
AACGTCAGACTAGTGG-1	0.325139	0	0.0340095	0.0597707	0.0101042	0.14004	0.0055111	0.021514	0	0	0.00741072	0	0	0	0	0	0.0152827	0.00107497	0.0546001	0.234455	0.0244433	0	0.00321792	0.0522524	0	0.0111739	0
AACGTGATGAAGGACA-1	0.483258	0	0.0137256	0.0412802	0.0228792	0.0194154	0	0	0	0.0435977	0	0	0	0.00117039	0	0.0022866	0	0.0081403	0.0128612	0.0354568	0.0170964	0	0.0179692	0.154082	0.0465167	0.080265	0
AACGTGCGAAAGTCTC-1	0.249602	0	0.0161352	0.0166535	0.0120069	0	0.0557954	0	0.00806578	0	9.18644e-06	0	0	0	0	0	0	0.0745974	0.0645222	0.1289	0.22413	0	0	0.0234201	0.111318	0	0.0148447
AACGTTATCAGCACCT-1	0.230956	0	0	0.0149714	0.017744	0.397995	0.0312472	0.00467037	0.000142444	0.00297419	0.0129778	0	0	0.0200795	0.0047983	0.00226928	0	0.0203641	0.041108	0.017347	0.084649	0.0218935	0	0.0182564	0.0278878	0.0152391	0.0124297
AACTAGCGTATCGCAC-1	0.182342	0.00674806	0.0196288	0.0540715	0.0101245	0.0533236	0.021712	0	0	0.0138134	0.0150148	0	0	0	0	0	0	0.0253841	0.0138246	0.501132	0.0159445	0	0	0.0545844	0	0.0123516	0
AACTAGGCTTGGGTGT-1	0.192008	0	0	0.048626	0.0149561	0	0.0663603	0.0740355	0.0250636	8.71282e-05	0	0.0377117	0	0	0.00881185	0.0244175	0.0160374	0	0	0.0875739	0.20245	0.0133699	0.00611913	0.0805815	0.0721577	0.0296327	0
AACTCAAGTTAATTGC-1	0.233846	0	0.0671066	0.0128935	0.0320235	5.37939e-07	0.0559118	0.0315521	0.0250742	0.00112703	0.0387435	0.00353424	0	0.00553953	0	0.000162665	0	0.00774882	0.0280738	0.0640097	0.163255	0.00361875	0	0.046102	0.106562	0.0387763	0.0343387
AACTCCTAATCCCATG-1	0.241421	0.000587407	0.00765821	0.0133926	0.0189648	0.0145983	0	0	0	0	0	0	0.00969534	0	0	0.0076369	0	0.00450061	0.0120566	0.507334	0.00496839	0.00473574	0.00622261	0.0875205	0.00562492	0.0530818	0
AACTCGATGGCGCAGT-1	0.186125	0	0.00414873	0	0.00888431	0.00365535	0	0	0.0876108	0.0255555	0.249422	0.0190864	0.0163046	0.00106903	0.0125741	0	0.00600702	0.156415	0.070587	0.0412533	0.0545823	0	0.0315101	0.0223343	0	0.000220108	0.00265531
AACTCTCAATAGAGCG-1	0.225632	0	2.46038e-06	0.0030852	0.0158801	0	4.26478e-06	0.00492533	0.04134	0	4.74063e-06	3.25354e-06	0.0146952	0.0172371	0	0.0120477	0.00114304	0.00280913	0.0364556	0.101157	0.0970624	0.000759126	0.0749195	0.25165	0.0428735	0.0366138	0.0196997
AACTCTCAGTGTGCTC-1	0.156749	0	0.0459951	0.468909	0.0122478	0.00108409	0.0268672	0.0340717	4.52219e-06	0	3.80326e-05	0	0	0.0212815	0	0	0.000647323	0.0300297	0.00824404	0.0411957	0.0247946	0.0395407	0.0446218	0.0275683	0	0.0161105	0
AACTGAGGTCAGCGTC-1	0.236556	0.0190138	0	0	0.0140378	0	0	0	0	7.16841e-08	0	0.0117891	0.00261133	0	0	0	0	0	0.0132634	0.0981344	0.190876	0.0368218	0.0829844	0.221582	0.0269828	0.0115784	0.0337692
AACTGATATTAGGCCT-1	0.213736	0.00374486	0.0391065	0.0567811	0.0118259	0.137076	0	0	0	0	0	0	0	0	0	0.00223594	0.0139372	0.00173962	0.0079102	0.308104	0.0394402	0	0.0165119	0.101411	0.00380005	0.0426393	0
AACTGGGTCCCGACGT-1	0.204708	0.00347975	0.0230511	0	0.042755	0.0162117	0	0	0	0	0	0	0.0099063	0	0.021636	0.0373311	0	0.0123416	0.0184549	0.380022	0.122602	0	0	0.0542054	0.0136158	0.0396799	0
AACTGGGTTCGAGCCG-1	0.279994	0	0.141694	0.0898361	0.0443709	0.0858229	0	0.0025547	3.44369e-07	1.10939e-06	0	0	0.00899777	4.29897e-05	0	0.00015749	0.0168599	0.057052	0.0135138	0.00915106	0.0733655	0.00377415	2.26248e-05	0.116747	0.0139481	0.042092	1.32578e-06
AACTGGTGTGGGCCTT-1	0.174775	0	0.111435	0.0988458	0.0159661	0.163203	0.0352036	0.00293695	0	0.0251886	0	0	0.00829535	0	0	0	0	0.011574	0.0126431	0.126684	0.069181	0.0276575	0.0523631	0.0362657	0	0.0277817	0
AACTTCTGCGTCTATC-1	0.202019	0	0	0	0.0238267	0.0239859	0.371572	0	0.0142077	3.23831e-07	0.0680817	0	0	5.0193e-07	0	0.00534062	0	0.00644171	0	0.0582739	0.160239	0	1.34198e-06	0.0222428	0	0.0437668	0
AACTTGCCCGTATGCA-1	0.192483	0	0.0178349	0	0.0483583	0.0143665	0	0	0	0	0.0816689	0	0.218937	0.0524384	0.0473585	0.0400754	0	0.0059111	0.0407556	0.134206	0.0145007	0	0	0.0724826	0.0186231	0	0
AACTTGCGTTCTCGCG-1	0.209013	0.00199975	0	0	0.0347322	0.0251716	0.232405	0.0790252	0.0230946	0.00109529	0.138212	0.000393261	0.0185764	0	0	0	0.00653305	0.00735958	0.0267795	0.0339232	0.0876142	0	0	0.0289065	0	0.0397397	0.00542631
AACTTTACGGGAGCTT-1	0.195363	0.00357579	0	0.00685109	0.013794	0.406011	0	0.0036665	0.0336565	0	0.0521095	0.00781834	0.010047	0.031893	0	0.00271039	0.0137028	0.00180623	0.0193256	0.0213917	0.0425033	0.0186497	0	0.0382515	0.0208649	0.0509807	0.00502803
AACTTTAGCTGCTGAG-1	0.23053	0	0.0105887	0.048327	0.00816722	0.059053	0.0121222	0.0121083	0	0	0.0339081	0.00612205	0.0266951	0.000261714	0.000264315	0	0.00345189	0	0.0182271	0.4079	0.0271851	0.00217229	0	0.0640556	0	0.0288596	0
AAGAAGGATCAGTTAG-1	0.169359	0.00435424	0	0.00399775	0.0067149	0	0.0145443	0.0164915	0.178845	0.121228	0.177161	0	0.0243705	0	0	0	0.00519554	0.0301931	0.0104526	0.0357825	0.105466	0	0.0433218	0.0176767	0	0.0293613	0.0054842
AAGACCCAACTGAACA-1	0.354635	0	1.99716e-07	0	0.0737856	0.0539136	0	0	0	0	0	0.00805424	0	0.0485969	0	0	0.108354	0	0.0484467	0.0543419	0.048652	0.00726147	0.0658375	0.00619852	0.0449177	0.0483908	0.0286139
AAGACTAACCCGTTGT-1	0.17423	0	0.00936434	0	0.00821047	0.0103084	0	0	0.212276	0.0442514	0.184826	0.0402223	0.0111572	0.00278967	0	0	0	0.0447979	0.0248548	0.0440837	0.119826	0.0037087	0.0126125	0.0230504	0	0.026306	0.00312415
AAGACTCACGCCCACT-1	0.210606	0	0.130082	0.102237	0.00177961	0.0807854	0	0.00744253	0	0.00125245	0	0.00197007	0.0207046	0.00540076	0.0146008	0.0159051	0	0.00958007	0.0172116	0.0830696	0.080797	0.00714007	5.42698e-05	0.155401	0.0306221	0.0233582	0
AAGACTGCAAGCTACT-1	0.157179	0	0.0109787	0.000643552	0.00832675	0	0.0551875	0	0.00562007	0	0	0	0	0	0	0	0.0404103	0.250594	0.0529843	0.117851	0.19958	0.0056506	0	0.0144899	0.0805037	0	0
AAGAGATGAATCGGTA-1	0.147801	0	0	0	0.020008	0	7.72615e-06	0	2.59864e-06	0	0.163751	0.00921834	0.244447	0.0448458	0	0	0	0	0.0616079	0.147558	0.0829125	0	0.0269856	0.0454825	0.00537254	0	0
AAGAGCTCTTTATCGG-1	0.263572	0	0	0.00989364	0.0205288	0	0.0463772	0	0.00374326	0.0192134	0.00692687	0	0.0132947	0	0	0	0.0182975	0.0269439	0.0319326	0.162476	0.221381	0	0	0.0389989	0.0976919	0	0.0187289
AAGAGGATGTACGCGA-1	0.174223	0	0.567794	0.0476345	0.0218509	0.0114357	2.80606e-06	2.54963e-05	8.47046e-05	0	9.32562e-06	0	0	2.193e-05	0.0225458	0.013426	0	0.00587751	0	0.0236381	0.0559266	0	0	0.00299711	0	0.0525072	0
AAGAGGCATGGATCGC-1	0.344437	0.00128196	0.00201604	0	0.0237106	0	0.0732823	0.0243897	0.010493	0	0.000131219	0	0	0	0	0.000494624	0.00603896	0	0.038272	0.148945	0.197134	0.000795598	0	0.0382627	0.0577702	0.032545	0
AAGATGGCACCGGACC-1	0.235189	0	0.0538215	0.140435	0.00434907	0.000818849	0.0600652	0.0110435	0.0207104	0	0.0649022	0.0366566	0	0.0150909	0	0.0150722	0	0.00241006	0.0150015	0.0601609	0.056093	0.00203892	0.0240369	0.040931	0.0783001	0.0373536	0.0255196
AAGATTGGCGGAACGT-1	0.313362	0	0	0	0.0147524	0	0.0113695	0.0173959	0	0.00485264	0	0.000276213	0	0	0.0280381	0.0266142	0	0	0.0169174	0.18309	0.122858	0.0238579	0.0474861	0.160011	0.0134846	0.0156347	0
AAGCACCCTGCGTATC-1	0.300644	0	3.09922e-06	0	0.00834916	0	0	2.20496e-06	0	0.0356316	0.0029766	0	0	0.011713	0.0175556	0	0.0102793	0	0.0174723	0.192399	0.12914	0.0169308	0.0235543	0.131912	0.070347	0.0310886	0
AAGCATACTCTCCTGA-1	0.225513	0	0.0332726	0.0551931	0.0148221	0.0157679	0.0418469	0.00153514	0	0	0	0.0424243	0.00622377	0	0	0.00427401	0	0.00508388	0	0.0916107	0.068509	0.0118587	0.107103	0.165711	0.0452055	0.0549308	0.00911343
AAGCCGCCGTGAAATC-1	0.0826501	0	0.0286284	0	0.00969394	0	0	0	2.46747e-06	2.63281e-07	0.0748537	0	0.38808	0.156795	1.17859e-05	1.78373e-06	0.0190953	0.00272846	0.0222883	0.0377901	0.0900742	0.00954519	0.0141393	0.0301106	0	0.033511	0
AAGCGCAGGGCTTTGA-1	0.213794	0.00738155	0	0	0.00118988	0.0230265	1.78315e-05	0.0243163	0.0214905	0.0481197	0	0.0128168	0	0	0	0.00379407	0	0.0136447	0.0229217	0.16431	0.104102	0.0403748	0.0574816	0.16679	0.0524362	0.0219921	0
AAGCGGCGTCATGGGT-1	0.242893	0	0.0262227	0.0253953	0.0101066	0	0	0	1.20977e-05	0.0459029	0	1.62148e-05	0.00754274	0	0.0180809	0.0197412	0.0120281	0.0040417	0	0.074734	0.0347214	0.0151695	0.0740353	0.284944	0.0352315	0.0379079	0.0312735
AAGCGTCCCTCATCGA-1	0.297862	0	0.0293856	0.132569	0.0114569	0.0207115	0	0	0	0.0286712	0.0112562	0	0.0105156	0.0246795	0	0	0	0.132406	0.0866848	0.0365027	0.0351518	0.0047378	0.0141036	0.00853371	0.110884	0.003888	0
AAGCTAGATCGAGTAA-1	0.276217	0	0.0206811	0.0372117	0.0363488	0	0.0907523	0.0106207	0	0	0	0.0179799	0	0	0.00207527	0	0	0.0196006	0.023356	0.130545	0.178697	0	0.0253212	0.0539139	0.0367121	0.0277732	0.0121945
AAGCTCGTGCCAAGTC-1	0.192159	0	0	0	0.023435	0.00690302	0.0437169	0	0.0178819	0	0	0	0	0	0	0	0	0.168434	0.0853791	0.128389	0.223612	0.00685184	0	0	0.075913	0	0.0273242
AAGCTCTTTCATGGTG-1	0.398786	0.0101518	0.0143699	0.00804382	0.0268169	0.000832718	0	0	0.0200805	3.84931e-06	0	0.00764305	0.00657139	0	0.0173351	0	0	0.00621567	0.0396461	0.0699148	0.240757	0	0.0329994	0.0659038	0	0.0332372	0.000691113
AAGGAGAACTTATAAG-1	0.244448	0	0.125357	0.0712862	0.0164108	0.136707	0.0273498	0	0	0	0	0	0.0143066	0	0	0.0206056	0	0.0179643	0	0.146009	0.051867	0.0122983	0.0116087	0.0444668	0	0.0403565	0.0189587
AAGGAGCGGTTGGTGC-1	0.14139	0	0	0.00454052	0.0273498	0.00304634	0.000830687	0	0.00298742	0.0278445	0.00342141	0	0	0.00100892	0	0	0	0.0204006	0.0497717	0.616607	0.0279193	0	0	0.0314221	0	0.0414598	0
AAGGATCGATCGCTTG-1	0.198442	0	0.0202492	0	0.004179	0	0.0157622	0.0264671	0	0.0067979	0	0.0375127	0	0	0.0102616	0.00178105	0	0.00160774	0	0.1343	0.105318	0.0103728	0.0510956	0.284947	0.0112769	0.0640278	0.0156012
AAGGATGAGGGACCTC-1	0.25514	0	0	0.00259162	0.0121362	0	0	0.0179313	4.88674e-06	0.00320118	0	0.0215252	0	0	0.0158475	0.0350629	0	0.000981083	0.0215878	0.102972	0.25597	0.0197667	0.0745524	0.149283	0.0114454	0	0
AAGGCGCGTAAAGCTT-1	0.309524	0	0.00980824	0	0.00923625	0.0396314	0	0.0227587	0	0	0.00416082	0.0209483	0	0	0.0113163	0	0	0	0.0482303	0.431773	0.019951	0	0	0.0597107	0	0.0129506	0
AAGGCTGTGCTCATCG-1	0.183594	0	0.00133954	0	0.0122204	0	0.00491143	0.0041852	0.0121291	0	0	0	0	0.0202631	0.00900914	0.0222949	0	0.00438248	0.0450053	0.592824	0.0622044	0	0	0	0	0.0256375	0
AAGGGAACGACTGGCT-1	0.124253	0.00600908	1.68005e-05	0.0388594	0.0146233	0.0194707	3.63039e-08	0	0.01338	0	0.0856318	0	0.317395	0.153482	0	0	0	0.0252585	0.011659	0.0382246	0.0421153	0.0132778	0.026021	0.000439061	0.0162837	0.0535995	0
AAGGGACAGATTCTGT-1	0.311254	0	0	0	0.0120888	0	0	0.00175721	0	0	0	0	0	0	0.0376926	0.0124051	0	0	0.0486829	0.177033	0.137041	0.00111822	0.0402873	0.173215	0.0225185	0.0249069	0
AAGGGACTATGCATTC-1	0.25353	0	0.0290321	0.0483117	0.00723862	0.00123862	0	0	0.015415	0	0.00655083	0.0171355	0.0330328	0.0249125	0.0241955	0	0	0.0596812	0.0248319	0.294639	0.0240159	0.00727516	0.0126458	0.0439078	0.0492831	0.0231271	0
AAGGTATCCTAATATA-1	0.215435	0	0	0.00821467	0.00766004	0	0	0	0	0.00110203	0	0	0.0308876	0	0.00744631	0.0241012	0	0.00390417	0.0230148	0.153257	0.370948	0	0.0265083	0.109255	0.0128271	0.00543913	0
AAGGTGATAAACCAGC-1	0.235466	0.00145011	0.00694275	0.00380169	0.021968	0	0.00182123	0.00533598	0.0111454	0.0139707	0.00150955	0	1.01437e-06	0.00174696	0.0191787	0.00788555	0	0.00712533	0.0574296	0.374395	0.135059	0.00942731	0.00446374	0.0526128	0.0154006	0.0118618	0
AAGTAAGCTTCCAAAC-1	0.119328	0.00762001	0	0.0129782	0.0156982	0	0	0	0.0289839	0	0.113959	0	0.27957	0.178613	0	0	0	0.012458	0.0199793	0.0782687	0.0464181	0.0052195	0.0134214	0.0548154	0	0.0126701	0
AAGTAGAAGACCGGGT-1	0.148373	0	0.0948567	0.136331	0.0192035	0.22408	0.016302	0.0154966	0	2.89063e-05	7.22076e-05	0	0	0	0	0	0	0.0151208	0.0345192	0.0673913	0.103856	0	0.0459982	0.0480577	0.0201895	0.0101229	0
AAGTAGTGACGCGAGG-1	0.306429	0.0079397	0.045103	0	0.023756	2.81901e-08	0.0185146	0	0.00578609	0.00712247	0.0494162	0	0.0215283	0.0124479	3.6865e-06	0.0118279	0	0.00592359	0.0359902	0.391472	0.00329196	0	0.0023475	0.0304029	2.05921e-06	0.020695	0
AAGTCAATTGTCGTCA-1	0.291334	0	4.69366e-08	7.57828e-06	0.0229654	0.00254316	6.67473e-05	0.00130607	0.0172143	1.13526e-06	1.15736e-06	0.0043494	0	0	0.0123028	0	0	0	0.0229975	0.419001	0.0742413	0	0	0.0371802	0.0329658	0.0615225	0
AAGTCTTCTGTGGCCT-1	0.390235	0.0225688	0	0	0.01652	0.285857	0.00575417	0	0	0	0.0138171	0	0.00357367	0	0.00346201	0.0759501	0.0109787	2.69103e-08	0.0262049	0.0138837	0.0611383	0.000414968	0.00439834	0.0214303	0.0267211	0.0170917	0
AAGTGACGACCGAATT-1	0.205988	0	0.554928	0	0.00177117	0	0	0	0	0	0	0.00229302	0.000970496	0	0	0	0	0.00682967	0.0313262	0.0420501	0.0482221	0	0.0588542	0.0301693	0	0.016598	0
AAGTGCAAAGGTAGAC-1	0.187177	0	0.0086996	0	0.0116614	0.492447	0.045802	2.49767e-05	0	0	0.0207592	0	0.00974605	0.00159266	0	0.00786355	0	0	0.0189033	0.0193609	0.0764776	0.0169268	0.0314785	0.0237723	0	0.0175469	0.00975968
AAGTGCGTTAGAATCT-1	0.205809	1.11506e-07	0.407368	0.12479	0	1.72473e-08	4.82572e-08	0	0	0	0	0	0.00325554	0.00719369	1.29653e-09	0.0327686	0.00607272	0	0	0.0294157	0.0140586	0.00229924	4.45407e-06	4.13224e-08	0.0470004	0.102748	0.0172155
AAGTGCTTCTCTATTG-1	0.165003	0	0.0687873	0.0676843	0.00450678	0.324905	0.00560873	0.0158927	6.56375e-06	0.00503279	4.17024e-06	0.00061419	0	0.0814319	0.0332192	0.00917086	0	0.00112281	0	0.0205249	0.0271566	0.0282597	0.00884675	0.0524837	0.0175641	0.0621734	0
AAGTGTTTGGAGACGG-1	0.352111	0.017311	0	0	0.0107427	0	0.000220723	0.00177245	0	0.00691725	0.0158885	0	0	0.0280142	0	0.00602027	0.00345352	0	0.0274482	0.121762	0.300456	0	4.68459e-09	0.107874	1.29454e-07	8.03722e-06	0
AAGTTCACTCCAAGCT-1	0.505818	3.94317e-07	0	0	0.0189603	5.15992e-07	0.0182134	4.59299e-07	3.1771e-05	0	0.00379041	0	0	5.47647e-07	0	0.0273248	3.00817e-07	0.0455607	0.0317861	0.079742	0.212296	0	0	0.0276597	8.91726e-06	0.0240288	0.0047769
AAGTTCAGTCTGCGTA-1	0.251032	0	0	0.0149965	0.0161506	0	0.000965355	0	0	0	0	0.0312477	0.0263889	0	0	0.0306076	0	0	0.00650266	0.0913594	0.0353787	0	0.0839148	0.255122	0.0526785	0.0602632	0.0433917
AAGTTCGGCCAACAGG-1	0.32633	0	0.0704382	0.350067	0.0275887	0.0148662	0.00294418	0.0103239	0.0176349	0	0	0	0	8.70079e-06	0	0.022864	0	0.0130432	0.022751	0.0417996	0.0440445	0	0	0	0	0.0352958	0
AAGTTTACTAATGGCA-1	0.224083	0	0.127157	0.103808	0.00898285	0.153366	8.8813e-07	0.0118219	0.00427539	0	0.018565	0.000451834	0.00502233	0.00108396	0	0	0	0.0148921	0.0259162	0.0939121	0.0490259	0	0.0335548	0.0871789	0	0.0369019	0
AAGTTTATGGGCCCAA-1	0.293102	0	0.0135614	0	0.0134749	0	0.00621111	0.016047	0	0	0	0.0294062	0	0	0	0.0115733	0	0	0.00464581	0.194802	0.150289	0.00871918	0.0649564	0.151753	0.022704	0.0187545	0
AATAACAACGCTCGGC-1	0.164509	0.00208088	0.499901	0.101555	0.00961469	0	0	0	0.003189	0	0.00923642	0	0.0569245	0	0	0	0.00180501	0	0	0.043765	0.033235	0.0113396	0	0.0219994	0	0.0408457	0
AATAACACTAGAACAA-1	0.151992	0.00726764	0.0312783	0.558053	0.00644075	0	0.00992936	0.015785	0.00146506	0	4.3754e-05	0.0143086	0.0246891	0.0148059	0.010599	0.00728998	0	0.0451607	0.0423103	0.0242714	0.0235332	0.00942426	0	0	0.00135243	0	0
AATAAGTCCTCGAGAC-1	0.253853	0	0.121549	0.0502042	0.0214409	0.159639	0.0224224	0	0	0.00181729	0	1.3278e-06	0.0044653	0.0013002	1.27948e-07	0	0	0.0256795	0.00943856	0.0959445	0.0429001	0.00151944	0.0224066	0.111731	3.81919e-07	0.0536864	0
AATACAATGTTTCAGG-1	0.184483	0.000912232	0	0	0.0119627	0	0.239347	0.0495814	0.0877591	0	0.0537996	0	0	0	0	0.0081474	0	0.0119561	0.0031999	0.101267	0.13014	0	0.0774648	0.0218256	0	0.0181545	0
AATACCGGAGGGCTGT-1	0.19625	0.00460146	0.0599478	0.0325712	0.00245446	0.231138	0.015268	0	0.0007247	0.012845	0.0532229	0.0211174	0	0.0443044	0	0.000568045	0.000514416	0	0.0153182	0.0351919	0.0782128	0.0113471	0.0390133	0.0205365	0.0495992	0.0203001	0.0549536
AATAGAACAGAGTGGC-1	0.347164	0	0	0.288832	0.0232092	0.00214561	0.0150483	0.00824307	0.0319516	7.75706e-06	0.0303439	0.00330997	0.000534542	0.00352315	0	0	0	0	0.0804676	0.0595174	0.0404551	0	0.00351967	0.0239231	0.0187565	0	0.0190478
AATAGAATCTGTTTCA-1	0.365319	0	0	0	0.0209517	0	0	0	0.0308656	0.0115907	0	0.00503342	0	0	0	0.0270297	0	0.0139725	0.0135286	0.177007	0.164835	0.00756053	0	0.096933	0.0353757	0.0299975	0
AATAGCAAGCCTCCTG-1	0.255211	0	0.000368303	0.0365735	0.0226958	0	0	0	0.00416364	0.00510946	0	0	0	0	0	0.0321344	0	0.0182386	0	0.0636375	0.176684	0.0401729	0.0883989	0.223851	0	0.028854	0.00390719
AATAGCTACCGCGTGC-1	0.234461	0	0	0.0522641	0.0195686	0	0	0.0196501	0	0.024592	0	0.0318905	0	0	0	0.0248181	0	0.0183552	0	0.14196	0.038471	0.00545908	0.0577126	0.252292	0.0231126	0.0553932	0
AATAGTCCGTCCCGAC-1	0.232167	0	8.20599e-05	0.0274434	0.0149592	0.0356206	0.0175159	0.0561079	0	0	0	0.0650895	0	0.00759176	0.00767903	0.0110144	0	0.0143493	0	0.136998	0.0639668	0.0316993	0.0881108	0.0370257	0.0945191	0.0580603	0
AATAGTCGCGAGTCGG-1	0.318096	0.00787195	0	0	0.0251292	0.315615	0	0	0	0	0.0430337	0	2.71413e-07	0	0.00456959	0.0152561	0.0195252	0.00618148	0.0361127	0.0506945	0.0455432	0.0365135	0.0176008	0.0296445	0	0.0285712	4.08079e-05
AATATCAAGGTCGGAT-1	0.218844	0.00480901	0	0.027412	0.014034	0.0553194	0.00512186	0	0	0	0.0081446	0	0.0169437	0	0	0.00669153	0	0.00100645	0.0264433	0.556423	0.0155454	0.00776165	0	0.0158129	0	0.0196872	0
AATATCCTAGCAAACT-1	0.28091	0	0.017812	0	0.0326709	0.313113	0.0556354	0.00231196	0	0.0224073	0	0.0220488	0	0.0218951	0.00638044	0.0233297	0.00890504	0	0.020202	0.0455106	0.0247264	0	0.0108289	0.0453254	0.0116557	0.0343316	0
AATATCGAGGGTTCTC-1	0.27664	0.00999594	0.00223233	0.0212035	0.0131902	0	0.0237249	0.00330884	2.22873e-06	0.00992597	0	0	0.0075669	0	0.0204125	0.0230736	0	0.00973307	0	0.143561	0.0877615	0.0238297	0.0430744	0.184503	0.0540057	0.0422541	0
AATATTGGAGTATTGA-1	0.192005	0	0.0630967	0.00864188	0.00496361	0.00298745	0.000484844	0	0.000150764	0	0.117193	0	0.188116	0.0738319	0.031338	0.00473311	0	0.00483512	0.00600453	0.111777	0.0672775	0.00209682	0.00862453	0.0590683	0	0.0527743	0
AATCAGACTGCAGGAC-1	0.189393	0.00395518	5.89729e-06	0	0.0207637	0.0478457	0.147846	0.0692617	0.0672273	0.0206195	0.109139	0	0	0	0	0	0	0.0121781	0.0298009	0.0409513	0.190215	0.00973348	0	0.0409115	0	8.94894e-05	6.38469e-05
AATCAGGTTTCATTTA-1	0.242975	0	0.00280694	0.0335741	0.00864643	0.0923522	0.0235343	0.0395637	0.0299641	0.042578	0	0.0656874	0.00169695	0.109201	0.000161589	0	0	0.0186826	0.0164704	0.0453053	0.11371	0	0.0302432	0.0381635	0.0218231	0.0228606	0
AATCATGTAAAGACTC-1	0.174803	0	0	0	0.0148213	0	0	0	0	6.43092e-07	8.97564e-08	0	0.00517596	0	0.00446335	0.00256825	0.0192152	0.00916482	0.0132104	0.646408	0.0553787	0	0	0.0160837	0.00642381	0.0322828	0
AATCCAAGGGCCTGAG-1	0.163426	0.0177454	0.153323	0.103881	0.0182902	0.219511	0	0.00655158	0	0	0.000615814	0	0.0056727	0	0	0.0233281	0.0152848	0.0178613	0.0313329	0.0576687	0.0722617	0.0139034	0	0.0733142	0.00602729	1.5886e-07	0
AATCCATGCAAGGGTG-1	0.162993	0	9.67358e-07	0	0.0169452	0.0209662	0	0	0.148471	0.126085	0.175699	0	0.00580751	0	0	6.85039e-06	0.0046029	0.0223086	0.0300086	0.0397933	0.174414	0.00445291	3.26663e-06	0.0284724	0	0.0227877	0.0161823
AATCGCCTCAGCGCCA-1	0.29797	0	0.00699706	0.00717642	0.0113324	0.0119911	0.0400335	0	0.0098485	0.0140835	0.0297909	0	0.00665827	0.0183983	0	0.00164328	0.00865027	0.0328653	0.0353364	0.18318	0.193043	0.00376017	0	0.0453387	0.0262173	0.0156852	0
AATCGGGACACTACGA-1	0.270649	0.00963142	0.116034	0.0827175	0.00724031	0.206867	4.55796e-06	0	0	0	0	0	0.0174667	0	0	0.0326175	0.00153186	0	0.0200369	0.040224	0.0495221	0	0.0600898	0.0588089	0	0.0265585	0
AATCTAGGTTTACTTG-1	0.115673	0.00210567	0.0316853	0.0276673	0.00636185	0.0309566	0.0377072	0.00292126	0.0411557	0.0422276	0.0832918	0.0273408	0.179031	0.0686706	0	0	0	0.0417662	0.0513479	0.0304209	0.0928852	0	0.014364	0.0230317	0.00550331	0.0438852	0
AATCTATGCCGGAGCC-1	0.244919	0	0.00729321	0.00249573	0.00157337	3.31698e-06	3.30007e-07	0.0127569	0	0	0	0	0.0179575	0	0.0406171	0.00872044	0	0	0.0335578	0.0751031	0.0973652	0	0.0937607	0.272024	0.0307447	0.0196479	0.0414595
AATCTCTACTGTGGTT-1	0.199347	0	0.013395	0.00111564	0.0265198	0.179408	0.201524	0.0414323	0.0257742	0.00589996	0.078295	0	2.53978e-06	0	0.0107501	0	0	0.00111537	0.0116749	0.0457034	0.0392868	0	0.0394833	0.00972441	0.015278	0.0380821	0.0161882
AATCTGCGTTGGGACG-1	0.290615	0	0.0213185	0.00705051	0.0118868	0	2.58389e-06	0	0.0125275	0.0133157	0	0.0215209	0.00346268	0	0	0.00314795	0	0.00556285	0.0415672	0.115334	0.0664327	0.0251194	0.0640486	0.215492	0.0463712	0.0340171	0.0012067
AATCTGGCTTTCTAGT-1	0.158188	0.00299827	0.0377399	0.0278481	0.00776972	0.0257234	0.0828283	0.0156231	0.0528183	0.0344311	0.09937	0.00114626	0.14466	0.0705271	0	0	0.0151412	0.00730278	0	0.0620142	0.0640764	0	0.0431262	0.0241573	0	0.0225102	0
AATCTGGGTAGACCCT-1	0.309485	0.00378112	0.143042	0.082162	0.00193258	0.0632621	0	0	0	0.0322966	0	0	0.0204909	0	0	0.0104635	0	0.0183219	0	0.0097907	0.0960266	0.00213496	0.00849307	0.109777	0.0280148	0.0605248	0
AATGACAGCAATGTCT-1	0.30353	0	0.182677	0.156467	0.0211433	1.30154e-05	0.0114712	0.000696466	0.0163781	0.00353338	0.0199437	0.0160853	0.00654541	0.0158348	0.00770226	6.93075e-07	0.00856123	2.54765e-07	0.0275713	0.0367271	0.0586555	0.0134962	0.0268031	0.0177041	0	0.04846	0
AATGACGTAGGATGTC-1	0.304274	0.00830481	0	0	0.0146431	0	0.0021972	0	0	0.029204	0.0237695	0	0	0	0	0.0212701	0.012272	0.0627824	0.0320922	0.124429	0.222873	0	0.0174953	0.100362	0.0240303	0	0
AATGACTGTCAGCCGG-1	0.278018	0	0.098453	0.120167	0.0280829	0.170104	0.0206415	0.00911968	1.28332e-05	0	4.44583e-05	0	0.00956008	0	0.00349885	0.025029	0	0	0.0396464	0.0688089	0.0571566	0	0	0.0626038	0.00905253	0	0
AATGAGTTCGCATATG-1	0.198748	0.00373003	0	0	0.0232924	1.21473e-06	0.233154	0.120808	0.0597436	0	0.107997	0	0	0	0	0.00198331	0	0.0151692	0.0365077	0.0458891	0.0920816	0.00586848	0.0237427	0.0163563	0	0.0066834	0.00824379
AATGATGATACGCTAT-1	0.371122	0	0.00915302	0	0.0140965	0	0.0104059	0	0	0.0206148	0	0.00246329	0	0	0.00271358	0.0215129	0	0.00457528	0.0267491	0.196683	0.0804311	0.00563415	0.0224092	0.133797	0.0166539	0.0314083	0.0295766
AATGATGCGACTCCTG-1	0.215786	0	0	0.0232941	0.00962441	0	0	0	0	0.00528312	0	0.0221811	0	0	0.00139227	0.0250078	0	0.0196564	0.0292676	0.165399	0.140314	0.0115384	0.0608487	0.199213	0.0443469	0.0268465	0
AATGCAACCGGGTACC-1	0.251162	0	0	0	0.0336102	0	0.00452736	0	0	0	0	0.00882291	0.00893269	0	0.0184423	0.0071568	0	0.00914593	0.0278887	0.329515	0.247095	0	0	0.0498909	0.00380957	0	0
AATGCACCAAGCAATG-1	0.276482	0.00415384	0.016802	0.00557447	0.00580247	0	0	0	0	0	0	0	0.0134346	0	0	0.0367598	0	0.0234728	0.00318169	0.0489122	0.057249	0.0392019	0.0561674	0.294603	0.0776949	0.0405074	0
AATGGTCCACCGTTCA-1	0.18265	0	1.20649e-06	0.00129483	0.0205572	0.000329958	0.148773	0.0837283	0.123291	0.0568874	0.0696377	0.0184449	0	0.00492786	0	0.0109457	0.00973255	0.0137081	0.0115664	0.0635454	0.121174	0	0.0271102	0.00776856	0	0.0239257	0
AATGGTTCTCACAAGC-1	0.165012	0	0	0.012767	0.0255921	0.023615	0.0130457	0	0.0184336	0	0.0610605	0	0.133997	0.0173094	0.0738584	0.00272742	0.0120903	0.0043109	0.0168604	0.362834	0.0310611	0	0.0186311	0.00679346	0	0	0
AATGTATGGCACTGTA-1	0.256055	0.00302784	0	0.0121231	0.00807391	0.417074	0.0146842	0.0141423	0	4.4527e-06	0	0.0137167	0.00859891	0.00176958	0.00901372	0.0273688	0	0	0.0180753	0.0310432	0.0309306	0.00302167	0	0.0104958	0.00598837	0.0433695	0.0714227
AATGTGCCCGAGGTGT-1	0.228219	0	0.144856	0.0476925	0.00705213	0	0	0	0	0.0277297	7.20148e-07	0.0266416	0.0361961	1.26712e-06	0	0	0.00959974	0.161512	0.0335363	0.0228232	0.0568995	0	5.78302e-06	0.0204701	0.148188	0.0285762	0
AATGTGCTAATCTGAG-1	0.136212	0	0.034361	0.0298647	0.0118056	0.00671263	0	0	0.00250093	0.105177	0.0202208	0	0.139136	0.0823834	0	0.0132167	0	0.00819455	0.023907	0.0650415	0.0649742	0.00171856	0.0300152	0.0258921	0.150798	0.0478685	0
AATTAAAGGTCGGCGT-1	0.264473	0	0.0064862	0.00865991	0.0143611	0	0.0738624	0	0	0.007427	0	0	0	0.00870978	0	0.00063618	0	0.0319768	0.023484	0.140597	0.266517	0	0.0129143	0	0.102295	0.0257641	0.0118355
AATTAACGGATTTCCA-1	0.272216	0.00444462	0	0.0307613	0.0177394	0	0.0151465	0.0298389	0	0	0	0.0253035	0.00351617	0	0.00947526	0	0	0.0190846	0	0.114327	0.105986	0.019369	0.0635708	0.136539	0.0869321	0.0457494	0
AATTACGAGACCCATC-1	0.292298	0	0	0.0102061	0.0455383	0.332572	0.0421668	0	0	3.13916e-07	0	0	0	0	0	0.0114042	0	0.0234163	0.017985	0.0380095	0.0276403	0.00803523	0	0.0371688	0	0.0626661	0.0508925
AATTAGCGCTGCAGCG-1	0.231143	0.00842451	0.0384461	0.0113635	0.0238913	0	0.0873971	0	0.0130949	0	0	0.00469113	2.06888e-07	0	0	0.00622698	0	0.0384255	0.0356468	0.093572	0.277309	1.24483e-06	0.000116421	1.79879e-05	0.0916167	0.0170051	0.0216102
AATTCATAAGGGATCT-1	0.323263	0.0231605	0.00735055	0.0171666	0	0	0	2.73725e-05	0	0.00857255	0	0.00468302	0	0	0	0	0	0	0	0.256073	0.123144	0.00556802	0.042868	0.12369	0.0198733	0.0445596	0
AATTCATTGTCATGCA-1	0.172536	0	0	0.0224019	0.00318645	0.433824	0.047664	0	0.000887467	0	0.00727179	0	2.55658e-07	0.00881853	0	0	0	0.00702317	0	0.0120822	0.0744276	0.0808234	0	0.037242	0	0.0588862	0.0329249
AATTCCAAGCATGTAC-1	0.370045	0	0.018704	0.00223698	0.0170371	0.0187048	0.0198301	0.0394518	0	0.0224324	0	0	0	0	0	0.0050742	0.0289371	0	0.0285243	0.160243	0.142539	0	0.012804	0.0573396	0.0247334	0.0243608	0.00700249
AATTCGATTCGAGGAT-1	0.27161	0.00300191	2.83211e-06	0.0143479	0.00766787	0.0012123	4.607e-05	0.0157137	9.56497e-08	0.0173358	0.00175618	0.0448039	0.0178553	0.0210334	0.00522221	0	0	0	0.0202521	0.211583	0.122228	0.00400143	0.04118	0.101379	0.0645535	0.00879479	0.00441854
AATTCTAGAGTTAGGC-1	0.218226	0	0.037464	0.0223101	0.0149592	0	0.101306	0.0109097	0.00715436	0.0126461	0	0	0	0.00569415	0.0118257	0.00739956	0	0.0110855	0.0313408	0.0995951	0.254197	0	0	0.0218977	0.079864	0.0270028	0.0251217
AATTGAACGCTCTGGT-1	0.284142	0	0.0229906	0.0109849	0.0102296	0	0	0	0	0.00365509	0.00572697	0.0185046	0	0	0	0	0	0.00773197	0.0282956	0.158068	0.271241	0.00177299	0.0208307	0.118061	0	0.0153823	0.0223828
AATTGCGTGGATTACA-1	0.31049	0.0151741	0.00914033	9.66087e-06	0.0279417	0.271349	0.0305781	2.27414e-06	0	0	0	0.00333887	0.0160467	4.1927e-06	0.00302291	0.00687672	0.0346885	0.0158742	0	0.0237723	0.0550124	0.0127787	0.0354116	0.0369058	0.0286237	0.0623568	0.00060085
AATTTGGGACATAGTA-1	0.177944	0	0.0167422	0.00498698	0.00958232	0	0	0	0	0.00739951	0	0	0	0	0	0	0	0.0112112	0	0.580105	0.0321155	0	0	0.101823	0.00583906	0.0522505	0
AATTTGGTTCCAAAGA-1	0.20973	0	0.0578267	0.0224751	0.0189338	0.0770237	0.0171151	0.000185092	0	0.00645256	0	0.00450821	0	0	0	0.000531294	0	0.000351033	0	0.389256	0.063233	0	0	0.0693881	0	0.0629902	0
ACAAACCATGCGTCCT-1	0.155209	0	0.002266	0	0.00849582	0	0.201006	0.0821262	0.125303	0.0805015	0	0.0176507	0	0	0	0	0	0.00592115	0	0.02194	0.171124	0	0.0328804	0.0116384	0.0338941	0.0483934	0.00165001
ACAAACCGACAAGGCG-1	0.292946	0	0.0875872	0.106959	0.0102427	0.0651228	0	2.13028e-05	0	0.0489415	0	0	0.0438766	0.0265301	1.09438e-05	0.0154816	0	0.00411275	0.0377865	0.0185938	0.03192	0.0205221	2.02991e-06	0.11519	0.0237751	0.0427929	0.00758487
ACAAAGAAGGTAGGCC-1	0.201203	0	0.0214912	0.0320824	0.00413534	0.396924	0.0986486	0.00725585	0.000670892	0.0180812	0.010704	0.00448019	0.0122919	0.0132944	1.98457e-07	0.00361701	0.00339587	0	0	0.0235035	0.0291638	0.00695998	1.53333e-05	0.0391668	0	0.0455944	0.0273203
ACAAATCGCACCGAAT-1	0.350081	0	0.0248844	0	0.0231218	0.00171399	0	0	0	0	0.00884386	0.00627776	0	0.000901893	0	0.0111366	0.010604	0.00643687	0.0310908	0.180366	0.236233	0	0.00395752	0.0730595	0.0153689	0.0159212	0
ACAAATGGTAGTGTTT-1	0.354235	0	0.0219753	0	0.00569982	0	0	0.00903301	0	0	0	0.00997432	0	0	0	0.0271835	0	0.00408824	0.0285375	0.164258	0.236944	0.014294	0	0.0655093	0.0201127	0.0381548	0
ACAAATTCAGATCTGA-1	0.221571	0.00415314	0.0281939	0.0289701	0.0076311	0.00312182	0	0	0	0.0312223	0	0.0116312	0	0	0	0.0204021	0	0.0051222	0.00511925	0.0545251	0.0653379	0.0215823	0.100846	0.290719	0.0284221	0.0418933	0.0295364
ACAACAGCATGAGCTA-1	0.212593	0	0.0254643	0.0200911	0.0164489	0	0.0866856	0	0	0.0164409	0	0	0	0	0	0	0	0.0265493	0.0546666	0.124777	0.279443	0	0	0.0106447	0.112584	0	0.0136107
ACAACGGTCCCTGCGA-1	0.189546	0	0	0.00396971	0.0154138	0	0.000166881	0	0.00657355	0	0.195548	0	0.226463	0.0663809	0.0130747	0.00613365	0	0.00403493	0.0483043	0.127208	0.0486456	0	0.029957	0.0029513	0	0.0156283	0
ACAAGCAGTGCCTAGC-1	0.125971	0	0.0089159	0.0135416	0.00548052	0.00240478	0	0	0.0208876	0	0.131103	0	0.275562	0.071572	0.0828949	0	0	0.00266798	0.047567	0.105284	0.0432593	0.00762701	0.0139027	0.0155912	0	0.0257681	0
ACAAGGAAATCCGCCC-1	0.288313	0	3.89088e-05	0.0296802	0.0161806	0	0.0233752	0	0.00981337	0.0174308	0	0.037081	0	0.00840702	0	0.0137	0	0.00762866	0.00154978	0.128258	0.149067	0.00534956	0.0243891	0.190821	0	0.0352705	0.0136458
ACAAGGCCTACCAGCC-1	0.24893	0	0.00352898	0.0359017	0.00382204	0	0.0183697	0.0149602	0.00119625	0.0307617	0	0.0293157	0.00179923	0	0	0.0195286	0	0.00271238	5.13737e-08	0.111661	0.0552234	0.0119483	0.0478297	0.254719	0.0310597	0.064755	0.0119769
ACAAGGGCAGGCTCTG-1	0.240141	0	0.0279614	0	0.0698404	0.012268	0	0	0	0	0.0186877	0.00392504	0.0165412	0	0	0	0	0.0992615	0.0633636	0.121743	0.239147	0	0	0.0686506	0.00111267	0.0173567	0
ACAATAGTCGTACGTT-1	0.186584	0	0.173949	3.3294e-05	0.0316172	0	0	0	0	0	0.0538259	0.00714652	0.0900149	0.0179061	0.0438113	0.0115867	0	0.00225464	0.0281844	0.272688	0.0153885	0	0	0.0394331	0	0.0165965	0.00897984
ACAATCCATTTAAACC-1	0.101553	0	0.477242	0.103008	0.00163373	0	1.95387e-05	0.00404211	0.02324	0	0.0282796	0.00484984	0.0373583	8.22018e-05	0	0	0	0.00531255	0.010741	0.0349316	0.0517662	0.0147589	0	0.0204965	0	0.0585253	0.0221593
ACAATCGATCTTTATA-1	0.233003	0.00133152	0.125144	0.0515952	0.0185933	0.0758875	0.00117036	0.0187713	0.0126438	0.00636852	0	0.00778972	0.00363295	0.00946351	0.00728467	0.0147385	0	0.016121	0.0214179	0.264784	0.0331554	0	0	0.0595163	0	0.0175873	0
ACAATGAATACGGAGA-1	0.18128	0.000815812	0.0736817	0.0560013	0.0123205	0	0	0	0	0.0166423	0	0	0.00599709	0.00341527	0	0	0.0159371	0.206853	0.0729704	0.0221098	0.0481612	0	0	0.0194084	0.264406	0	0
ACAATGATTCTTCTAC-1	0.24281	0.00785757	0.000378167	0.00370848	0.00902684	0	0	0	0.00254151	0.0213026	0	0.00685124	0.00206075	0	0	0.0207234	0	0.000206966	0.0094071	0.0927437	0.209246	0.0161181	0.0920974	0.219254	0.0130461	0.0278124	0.00280802
ACAATTGTGTCTCTTT-1	0.363486	0	2.0788e-06	0	0.0201967	0	0	0	0	0	3.56454e-07	0	0	0	0	0	0.0119476	0.0158368	0.0455664	0.387235	0.0973085	0.00978284	0	0.0190266	0.0233228	0.00628889	0
ACAATTTAGGAGGCTC-1	0.18361	0	0.0055228	0	0.0167895	0.426283	0.044496	4.60668e-06	0.00286387	0	0.0564752	0.00967769	0.0247705	1.79065e-05	0	0	0	0.00552679	0.0253575	0.0234144	0.0424492	0.0107098	0.0201015	0.0315601	0.0129482	0.0436157	0.0138063
ACAATTTGAGCAGTGG-1	0.197388	0	0.00183252	0	0.0384146	0	0.00192969	2.05717e-05	1.46921e-06	0	0.00325647	4.24976e-07	0.0182734	0.00654865	0.0383519	0	0	0.00977813	0.0031868	0.0882577	0.393705	1.16454e-06	0.054162	0.0934877	0	0.0514042	0
ACACAAAGACGGGTGG-1	0.290776	0	0.0159334	0.0319642	0.0146444	0.0310798	0	0	0	0.00709116	0	0	0	0	0.00801074	0.00916478	0	0	0.0871196	0.383928	0.0755944	0	0	0.0446929	0	0	0
ACACACCAGGACCAGT-1	0.211052	0	0.0158502	0.0205193	0.00889277	0	0.0237188	0	0	0.0289124	0.00229751	0	0	0.025546	0	0.0128008	0	0.0375612	0.0252614	0.243662	0.141411	0	0	0.148427	0.0171988	0.0368894	0
ACACACTTTCTACACG-1	0.184402	0	0.0847058	0.0467356	0.00616256	0.132139	0	0	0	0	0	0	0.00818209	0	0	0.0182728	0	0.0321154	0.0216324	0.28979	0.010611	0	0.0360712	0.0845148	0.0138118	0.0308538	0
ACACATGATCAAATCT-1	0.163261	0	0.000222682	0.00618034	0.00870268	0	0.0354857	0	0.0914532	0.18373	0.0457447	0.0345664	0.0513216	0.0126305	0	0.0161795	0.0250059	0.0119745	0.0156579	0.0314947	0.0736231	0.0102238	0.0949929	0	0.0502564	0.0309273	0.00636589
ACACCACATAATTAGC-1	0.320503	0.00631738	0	0.0141175	0.0184251	0.0307551	0	0	0.00302936	0	0	0	9.30771e-07	0.000658567	0.0115498	0	0	0.0165199	0.0113791	0.171896	0.052787	0	0.0712676	0.187477	0.0146611	0.0686555	0
ACACCCAGCATGCAGC-1	0.307385	0	0.00854659	0.0238131	0.0660914	0.0639601	0	0	0	0.0210875	0	0.0170794	0	0	0	0	0	0	0.145604	0.159007	0.0366189	0.00195047	0	0.0548003	0.0369869	0.0489187	0.00815102
ACACCCGAGAAATCCG-1	0.23701	0	0.0885967	0.0749733	0.0207926	0.142879	0.0206406	0.00798262	0	0.0146438	0	0	0	0	0.0186249	0.00927859	0.0144019	0.00508086	0.0500183	0.167142	0.0521227	0	0	0.0463425	0	0.0294694	0
ACACCGGTCTGACCGC-1	0.207446	0	0.0149473	0.00907141	0.0135064	0	0.168517	0.0208999	0.108734	0.0646924	0	0.0275589	5.55208e-05	0	0.00477315	0.0235749	0.0125664	0.0149142	0.0353322	0.0545644	0.090289	0	0.0450447	0.0232615	0.0333561	0.0268944	0
ACACCTTAAGTAGGGC-1	0.426104	0	0.0321874	0.0592307	0.0356105	0.107832	0	0.0048638	0	0	0	0	0.0200497	0	0.00724699	0.013732	0.0145856	0	0.0649914	0.0990986	0.0249691	0	0	0.0376027	0.025441	0.0264543	0
ACACGAGACTCCTTCT-1	0.250769	0.00113436	0.0378921	0.0208763	0.0183701	0	0.0730096	0	0.0114312	2.93091e-05	0.0224682	0	0	2.4217e-05	0	0	0	0.0536554	0.0316571	0.0730573	0.273933	0.00991915	0	0	0.0922924	0.0294814	0
ACACGGCACTATGCAT-1	0.197589	0	0.108728	0.0852549	0.00208832	0.134304	0.00233979	0	0	0	0	0	0	0	0.0107196	0	0	0	0.0316439	0.278156	0.038547	0	0.0208321	0.0535566	0	0.0362407	0
ACACGGGAACTTAGGG-1	0.224357	0	0	0.0203237	0.026187	0	0.0321228	0	0.0326577	0	0	0.00898986	0	0	0.00138174	0	0	0.0584419	0.0370302	0.20072	0.221842	0	0.00708199	0.0204719	0.0790713	0.0293205	0
ACACTCCAATGTCACT-1	0.18446	0	0	0.0296583	0.00735766	0.125124	0.260795	0	0.0249191	0	0.0592442	0	0.0143276	0	0	0	0	0.0119602	0.0125134	0.034019	0.17696	0	0.00333579	0.0383047	2.53764e-05	0.0169963	0
ACAGAACTGAGAACAA-1	0.196439	0	0.341162	0.0437866	0.00661384	0.000363281	0.0244591	0.0135692	0	0.00303652	0.00840627	0.0147471	0.000140241	0.00564183	0.012749	0	0	0.014262	0	0.0258422	0.0851859	0	0.0464915	0.0272699	0.0681163	0.0617182	0
ACAGATTAGGTTAGTG-1	0.190276	0.000610163	0.134524	0.107111	0.0144817	0.192284	0.00184513	0.0126482	2.31622e-05	0.0169257	0	0.00753774	0.0337336	5.73196e-07	0	0.020053	0	0	0.0240053	0.0735128	0.0472588	0.001983	0.0574736	0.0358149	0	0.0278969	0
ACAGCATAGAGCCAGT-1	0.236155	0.00997218	0.139316	0.0833955	0.0153397	0.180707	0.0238649	0	0	0	0	0.00897229	0.00165084	8.44417e-05	0	0.017268	0	0.00425477	0.0145945	0.108104	0.0508704	0.0020324	0.0267159	0.0767031	0	0	0
ACAGCGCACCCGCAGC-1	0.15389	0.00528688	0.14091	0.113934	0.00573644	0.110402	0	0.0150051	0	0.0454991	0	0	0	0	0	0.00720777	0	0.0147173	0	0.0175045	0.0385458	0	0.0709948	0.165284	0.0210932	0.0739893	0
ACAGGCTTGCCCGACT-1	0.410351	0	0	0	0.0268069	0	3.46296e-07	0	0.000932093	0.0198393	0.0188889	0	0	0	0.010083	0.00727662	0	0.0750926	0.0335273	0.124861	0.196846	0.000741573	0	0.0541181	0	0.00950396	0.0111307
ACAGGTGGAGGTGAGG-1	0.127582	0	0.0538111	0.509872	0.0176204	1.40353e-06	0.0209492	0.00821509	4.79866e-06	3.71337e-07	5.64073e-06	0	0	0.0110309	0	0	0.0141924	0	0.0120578	0.0219649	0.035495	0.036362	0.0492158	0.036074	0.0318338	0.0116512	0.00206068
ACAGTAATACAACTTG-1	0.167462	0.0107108	0.0253639	0.033289	0.0197171	2.76183e-06	0.0592828	0.0105577	0.0995394	0.0469467	0.0959683	0.0466048	0.0390696	1.2014e-05	0	0.000178644	0	0	0.0197649	0.0456679	0.0698189	0	0.0769837	0.0588784	0.0336603	0.0405206	0
ACATAAGTCGTGGTGA-1	0.150314	0	0.0128644	0.0139279	0.00513471	0.347583	0.178233	0.0108061	0.0181046	0.00253261	0.0477155	0	0	0.013129	0	0.00631173	0	0.00296121	0	0.0573024	0.0305996	0	0.0218722	0.0123313	0.0231613	0.0451147	0
ACATAATAAGGCGGTG-1	0.219508	0	0	0.0338889	0.016524	0	0	0	0	0	0	0.0139672	0	0	0.0155947	0.00158817	0.0214942	0.0110294	0.00974033	0.385105	0.13558	0	0	0.098825	0	0.037155	0
ACATCAGCTGGGACGC-1	0.216665	0.011202	0.00942536	1.22785e-05	0.0211088	0.185422	0.216487	0.0504987	0.0352621	2.43053e-06	0.0969044	0	0	0	0	0	0	0.0159574	8.50819e-07	0.031388	0.0931454	0	0	0.00667823	0	0.00983988	0
ACATCCCGGCCATACG-1	0.223311	0	0.00553535	0.0118017	0.00653044	0.00794194	0.0478638	0.0661439	0	0	0	0.0664193	0	0	0	0	0.00592597	0.0058789	0	0.0802694	0.135533	0.0160111	0.0838885	0.0676831	0.0867408	0.0825214	0
ACATCCTGGTAACTGT-1	0.281497	0.00486579	0	0.0192994	0.00724666	0	0.0209347	0.0190755	0.0222872	0.0173498	0	0.0321818	0.00349558	0	6.87479e-06	0.00916902	0	0.00602068	0.0357481	0.131565	0.120039	0.0148823	0.0575019	0.125616	0.0549926	0.0162252	0
ACATCGATCGTTTACC-1	0.257368	0	0.0355357	0	0.0124646	0	0.0527583	0	0.00333681	0.0229869	0.0047173	0	0	0	0	0	0	0.0181843	0.0364307	0.0737978	0.258591	0	0	0.0366765	0.130576	0.0342062	0.0223697
ACATCGGTCAGCCGCG-1	0.251929	0	0.257143	0.0911934	0.0103852	0	0.035349	0.0098894	0.0169191	0	0.00486437	0.0184769	0.00908476	0.032148	0	0.00561845	0	0.0105167	0.0122834	0.0558739	0.0725003	0.022021	4.87705e-05	0.0217017	0	0.0620535	0
ACATCGTATGCAATGG-1	0.226693	0	0.0187613	0.00898412	0.00852009	0	0.0134634	0	0.00195055	0.0358107	0.0137133	0.0259232	0	0	0	0.0245381	0.0311698	0.0150673	0	0.0714538	0.280325	0.00890444	0.0153659	0.158013	0	0.0413429	0
ACATCGTTAACCTAGT-1	0.185685	0.00890781	0.0835552	0.046946	0.00940634	0.13407	0.00513691	0.0312063	0	0.0142055	0	0.00264765	0.000117796	0	0.00942432	0.0104361	0	0.00558898	0	0.26038	0.0231423	0	0.0411295	0.0475826	0.0133454	0.067087	0
ACATCTCAACGCGTAA-1	0.246624	0	0.0823357	0.0777045	0.00675889	0.100904	0	0	0	0	0	5.4981e-07	0.0271668	0	0	0.00434498	0	0.0383487	0.0257324	0.217226	0.0212443	0.00382265	0.0467794	0.0682083	0	0.0327999	0
ACATGGCTCAATTTAG-1	0.269448	0.00346362	0	0	0.0312044	0.294471	0	0	0.040193	0	0.0614793	0	0	0	0	0.0318312	0.0122148	0.038827	0.00958177	0.0210361	0.0451211	0.0654866	0.00161873	0.0150971	0.0113358	0.0435405	0.00405045
ACATTAGTTTATATCC-1	0.259105	0.0104227	0.0167939	0.0152848	0.0227982	0	0.0672747	0	0.016635	0	0	0.0190247	0	0	0	0	0.0115389	0.0784487	0.0268251	0.0757686	0.257585	0	0.00353942	7.24706e-05	0.0882743	0.0102059	0.0204023
ACATTCGCGCGGAATA-1	0.232848	0.000703159	0.020754	0.0249977	0.0100795	0.261963	0.100135	2.93047e-05	0.0115494	0.00406872	0.0353567	0	3.53753e-06	0.03762	1.10237e-07	0.0175677	0	0.00746302	0.00618373	0.0207693	0.0161561	0.0265994	0.00558634	0.0309423	0.00737368	0.0434255	0.0778249
ACCAAACACCCAGCGA-1	0.318474	0.00828722	0.00643427	0	0.0103159	0.0124207	0.00764245	0.0356651	0	0.0165969	0	0.0299138	0	0.0119861	0.000353534	0.0539443	0	0	0.00755095	0.0290158	0.0235218	0.0203386	0.0791024	0.237174	0.0338258	0.0453812	0.0120552
ACCAAACTAGAAATCC-1	0.215329	0.000858173	0.123646	0.0857625	0.0118223	0.183569	0	0	0	0.0133021	0	0	0.00590402	3.90839e-05	0	0.00143223	0	0.00238179	0.0250552	0.0616019	0.0376948	0.022111	0.0642958	0.120962	0	0.0242329	0
ACCAACACCACACACT-1	0.289194	0	0.00237028	0.043534	0.0164739	0	0.00653748	0.0159313	0	0	0	0.0144637	0	0	0	0	0	0.00685113	0.00450672	0.097287	0.0665428	0.0399733	0.060631	0.270118	0.026058	0.0356628	0.00386401
ACCAAGAACGCGTGTC-1	0.206538	0.00575891	0.0996833	0.106173	0.0139365	0.155069	0	0.0224962	0	0	0	0	0.00150493	0	0	0.0138901	0	0.0193825	0.00714177	0.101087	0.052105	0.0238656	0.0438576	0.100636	0	0.0268746	0
ACCAATATGCAAGTTA-1	0.379224	0	2.04727e-05	0.00155774	0.0109525	0	9.42897e-06	0	0	0.0175381	0.0168671	4.88602e-05	0	0.00390363	0	0.0147741	0.00888923	0.000358923	0.0286232	0.137604	0.175706	0	0	0.142277	0.0349254	0.0267212	0
ACCACAACTCAGAACA-1	0.353056	0.01661	0.0712173	0.0480484	0.0147473	0.023249	0.0157436	0.0480288	0	0.00285156	0	0	0.0134914	0	0	0.00766156	0.00219303	0	0.00472361	0.0373649	0.043284	0	0.0315711	0.127874	0.0213246	0.0669439	0.0500164
ACCACAAGTTTCTATC-1	0.275198	0	0	0	0.0185096	0	0.00846549	0.00840698	0	0	0	0.000112992	0	0	0.0160815	0.023537	0	0.00475413	0.015015	0.237537	0.281889	0	5.50413e-06	0.0487448	0.031611	0.0301324	0
ACCACGTGCAGCTATA-1	0.271853	0	0.00116685	0.0245777	0.025423	0	0.00516393	0	0	0.0130859	0	0.0288191	0	0	0.0198443	0.00820993	0	0.0135884	0.0202596	0.166881	0.177094	0.0106875	0.0255567	0.121999	0.0251	0.0406899	0
ACCAGACCATAACAAC-1	0.290465	0	0.00388941	0.0463236	0.00449598	0.29601	0.00159893	0.0268175	0.0259836	0	0.0465822	0	4.15869e-07	5.10315e-05	3.91811e-06	0.0344321	0	0	0.063075	0.0267923	0.0618152	0	0.0308085	0.0241702	0	0.00356583	0.0131197
ACCAGCCCGGTCTTTG-1	0.181146	0	0.117649	0.122655	0.0220233	0.151221	0	0.00764721	0	0.0180577	0	0	0	0	0.00829593	0	0	0	0.0215722	0.0782409	0.0564448	0.00101171	0.0605343	0.0929584	0	0.0605434	0
ACCAGGAGTGTGATCT-1	0.236485	0	0.10649	0.0688606	0.0028436	0.149192	0.00452925	0.0194928	0.00294565	0.0220333	0.0269162	0	0	0.00653275	0	0.00392626	0	0.00692852	0.0357698	0.105334	0.0370668	0.0118743	0.0313105	0.0846702	0	0.0257661	0.0110325
ACCAGTGCCCGGTCAA-1	0.242455	0.00619694	0.0144272	0.00426099	0.00990309	0	0	0	0	0	0	0	0.0063369	0	0.00363336	0.0209688	0.00175159	0.0149821	0	0.112639	0.119694	0.0341138	0.0620727	0.25323	0.0429779	0.0277347	0.0226215
ACCAGTGCGGGAGACG-1	0.334402	0	0	0.0152361	0.0470546	0	0.004952	0	0.0172821	0.00737788	0	0	0	0	0	0.0269129	0	0.0351085	0.0546342	0.16471	0.209891	0	0	0.0536357	0.0288033	0	0
ACCATATCCGCAATAA-1	0.284583	0.0047032	0	0.0231962	0.0254381	1.04778e-05	0.0528164	0	0.0230196	0.0131171	0.0148677	0	2.00136e-07	5.0484e-07	0	1.64838e-07	0	0.0311976	0.0132904	0.0479202	0.28551	0	0	0.0147784	0.109135	0.0412424	0.0151731
ACCATCCGCCAACTAG-1	0.166012	0.00458893	0.0307064	0.0218158	0.00950429	0.0254725	0.0909095	0.0284839	0.102146	0.118482	0.0593457	0.0183746	0.00420438	0	0.0107191	0.0110618	0	0.00745633	0.0224314	0.0247083	0.0998993	0	0.0685312	0.0143074	0.0250453	0.0357943	0
ACCATCGTATATGGTA-1	0.261181	0	0.11699	0.0404933	0.0215366	1.22515e-05	0.0602229	0	0	0	0	0	0	1.70467e-06	0	0.0356156	0	0.0217807	0.0131786	0.127547	0.211033	0.00447853	1.95898e-06	0	0.0678838	0.0180424	0
ACCCAACGCCCGTGGC-1	0.243147	0	0	0	0.012944	0	0	0.0093055	0	0	0	0.0224819	0.0121478	0	0.00673448	0.00474172	0	0.0124062	0.0261105	0.252165	0.192132	0	0.0421728	0.138151	0.000680006	0.0246797	0
ACCCACCTACATGCTC-1	0.197886	0	0	0	0.00988634	0.0206604	0.00308946	0	0.0272741	0.0328198	0.256861	0	0.190251	0.00324158	0	0	0.0129471	0.0187098	0.0410558	0.0595012	0.0762471	0	0	0.0219177	0	0.0276515	0
ACCCATCTTGAGGGTA-1	0.189634	0	0.369301	0.0848667	0.0174185	0.00499437	1.39669e-06	0	0	0	0.0109511	0.000170589	0.0301396	0.0476128	0	0	0.00100362	0	0.0120246	0.0561916	0.041574	0	0.0380316	0.0261146	0	0.0699701	0
ACCCGAGCGAAATTAC-1	0.201102	0	0	0.0820855	0.0152616	0	0	0	0.00293194	0	0.0165339	0.01068	0.0201552	0.0247453	0.0126394	0.0124021	0.00933777	0.0298819	0.0255293	0.396167	0.0267937	0	0.0254283	0.0154885	0.0504996	0.0223366	0
ACCCGATTGGTTCCGA-1	0.160161	0	0.0330532	0.0647713	0.00792417	0.274948	0.0038323	0.0264959	0.0232354	0.0542051	0	0.0185089	0	0.090254	0.0209226	0.00169761	0	0.00122036	0.0165968	0.0230152	0.0469816	0	0.0140525	0.0250418	0.0375015	0.0457109	0.00986955
ACCCGGAAACTCCCAG-1	0.258738	0.00299273	0	0.0203404	0.0182364	0	0.00933328	0.0682201	0.0156984	0	0	0.0410447	0	0	0.00382758	2.97646e-05	0	0.00741263	0	0.12792	0.120448	0.0134688	0.0606266	0.142096	0.0588813	0.0306846	0
ACCCGGTTACACTTCC-1	0.298776	0	0.0456118	0.0115347	0.00849229	0	0.063093	0	0.014149	0.0144711	9.39485e-06	0	0	0	0	0	0	0.00524215	0.0190581	0.141375	0.204626	0	0	0.00529038	0.0853243	0.0434989	0.0394482
ACCCGTGTCATCAGTA-1	0.375676	0	0.0304511	0	0.070469	0.0330674	0.0160805	0.0319061	0	0	0.0238933	0.000360742	0.00747976	0.00980957	0	0	0.112315	0.00446557	0.0169159	0.0712457	0.0511873	0	0.0787373	0.00932852	0.0237061	0.0329044	0
ACCCTATAGGACTGAG-1	0.213052	0	0	0	0.0123237	0.105771	0.183238	0.0786803	0.00801228	0	0.123725	0	0	0	0	0	0	0.00204232	0.0228698	0.0609511	0.122893	0	0.0132451	0.0124701	0	0.0165435	0.0241816
ACCCTATGCCATATCG-1	0.228	0.00112311	0.0268197	0.520768	0.0074892	0	0	0	0.0205413	0	0.012453	0	8.76343e-06	7.69003e-06	0	0	0.0105745	0.0215554	0.0457319	0.0316574	0.0244412	0	0.00937376	0.0153695	0.000589957	0.023495	0
ACCCTCCCTTGCTATT-1	0.204716	0.00163651	0	0	0.00904624	0.00243785	0.00602168	0	0.0259056	0.0210575	0.00865604	0.0179082	0.0133197	0	0	0.0629074	0.0044521	0.0127083	0.0198062	0.0981379	0.214031	0.00481837	0.0170944	0.189505	0.0364372	0.0293968	0
ACCCTGGTAACGCCCT-1	0.297946	0	0	0.0259538	0.00476338	0	0.00150986	0.00476593	0	3.34924e-06	0	0	0	0	0.0198249	7.60945e-07	0	0.0174916	0.0569437	0.133731	0.0552495	0.0185365	0.0744038	0.20127	0.0507721	0.0244678	0.0123667
ACCCTTCATCTGCGAA-1	0.204324	0	0.114384	0.0720504	0.0352171	0.139465	0	0	0	0.00061411	0	0	0.0149917	0	0	0.0164212	0	0	0	0.107965	0.058343	0.0131529	0.0427849	0.120828	0	0.0594603	0
ACCCTTTAGTTCTCCA-1	0.311794	0.0291453	0.0463811	0.071751	0.0078059	0.0218168	0	0.0333326	0.00986476	0.00332372	0	0.00681469	0.0327801	2.12722e-06	0	5.8396e-06	0	0.00122547	0.00989113	0.0206639	0.0409654	0.0202019	0.043378	0.114234	0.00757632	0.0874348	0.0796112
ACCGAAAGGGCCCTGC-1	0.188008	0	0.129806	0.0887977	0.0108543	0.205458	0.0186168	0.00698748	0	0.0135989	0	0	0	0	0	8.60972e-06	0	0.00477197	0.0302212	0.120692	0.0801146	0.00819274	0.000178037	0.0504434	0	0.0405547	0.0026953
ACCGAAGAGTCTGGTT-1	0.174241	0	0.0179486	0.0172381	0.0206803	0.113911	0.275485	0.0691509	0.0093424	0.00567891	0.0240371	0	2.39021e-06	0.00074131	0.0153647	0	0.0189315	0.00167774	0.0183485	0.0296454	0.0828431	0	0.0213341	0.0187114	0.0155247	0.0408874	0.00827531
ACCGACACATCTCCCA-1	0.275669	0.00576917	0	0	0.0145555	0	0.032474	0.0411264	0	0	0	0	0	0	0	0.0329183	0	0	0.0434085	0.281441	0.0718978	0	0.0097135	0.135764	0.0550279	0.000235421	0
ACCGACTGAGTCCCAC-1	0.281415	0.0021788	0	3.43987e-05	0.0419062	0.00611135	0.0483465	0	0.00199083	0	0.0143858	0.00072238	0	0	0	0.00133668	0	0.0111444	0.023372	0.155683	0.259818	0	0	0.0349452	0.0724874	0.0441221	0
ACCGATGGTAGCATCG-1	0.206943	0	0	0.00982591	0.00927954	0.00243833	0	0.00265835	0.0179884	0.00994018	0	0.0175003	0	0.0122691	0	0	0	0.00527611	0.0286385	0.116547	0.0827458	0.0199727	0.078277	0.256652	0.0603556	0.0391735	0.0235191
ACCGCAATAACTGCCT-1	0.246975	0.00566144	0	0.0283883	0.00953539	0	0	0	0.000510186	0.0125217	0	0.0298929	0	0	0.00411665	0	0	0.00731505	0	0.101178	0.311807	0	0	0.172576	0.0339048	0.0235723	0.0120456
ACCGGGCCTTTGTTGA-1	0.324387	0.0191413	0	0	0.00945412	0	0.0139138	0	0	0	0	0.00400579	0	0	0	0	0	0.042495	0.0497743	0.299585	0.148871	0	0.0107091	0.0483118	0.00127301	0.0280783	0
ACCGGTCAGGTACACC-1	0.141598	0	0.00284223	7.64366e-05	0.0269449	0.00586918	0.101572	0.0693959	0.133346	0.155136	0.0398811	0.0326148	0	0.00195278	0	0	0.0168785	0	0.0321853	0.0325336	0.0652929	0	0.075242	0.00920333	0.0393435	0.018092	0
ACCGGTCTGAGTACGG-1	0.228761	0	0.13395	0.0934651	0.0077632	0.0968156	0	0.0194114	0	0.0087781	0	0.00495591	0.00975594	0	0	0.0232805	0	0.0181257	0.00949936	0.0342681	0.073899	0.0032222	0	0.131385	0.0500706	0.0470646	0.00552854
ACCGTGACCACGTGGG-1	0.237363	0	0.0211389	0.0630126	0.00727335	0.02085	0.0889152	0	0.00891214	2.52195e-06	0.0951748	0	0.0224064	0.0135753	0	0	0	0.00342072	0.0221469	0.0683055	0.13436	0.00830398	0.00685096	0.0283894	0.0942629	0.0299892	0.025346
ACCGTTCCCGCTCTGA-1	0.244537	0.0176125	0.115216	0.0844458	0.0230363	0.134977	0.0278404	0	0	0.0251204	0	0.00222408	0.0205966	0	0	0.0198209	0	0.00392106	0.00654557	0.0607224	0.046115	0.0173374	0.0271015	0.0624416	0.000171925	0.0572383	0.00297808
ACCTAAGTACCTTTCA-1	0.289109	0.00252483	0.162516	0.154382	0	0	0.0316065	0.00282029	0	4.1972e-06	0	0.0159595	0	0	0	0	0.000701684	0.0207765	0.0482767	0.0642562	0.0552663	0.00833614	0.0314476	0.0137704	0.00533887	0.0671977	0.0257105
ACCTAATCGACTTCCT-1	0.282306	0	0	0	0.0112287	1.14603e-07	0.00905574	0	0.00452256	0.0235801	0.0098995	0.0245272	0.0245734	0	0	0.00531053	0.0047548	0	0.053535	0.457033	0.0109852	0	0.0115735	0.0388831	0	0.028231	0
ACCTCCGTTATTCACC-1	0.250562	0	0.0257207	0.0714555	0.00361472	0	0	0	0.0165209	0.0157012	0	0	0.000241455	0.00125413	0.0306061	0.0320492	0	0.0166521	0	0.0732049	0.0380601	0.00335142	0.11166	0.244744	0.0128948	0.0517062	0
ACCTCGAACTTATGCT-1	0.171418	0.00455856	0.00257144	0.0118144	0.0143463	0.0869282	0.287289	0.0386618	0.0452193	0	0.0104776	6.25448e-05	0.00497322	0	0.00910069	0	0	0.00212299	0.0125598	0.0387904	0.168421	0	0.0274332	0	0.000528652	0.0538239	0.00889824
ACCTGCGTGTCATGTT-1	0.166162	0.0170027	0.101435	0.00689851	0.0105694	0.000234999	0.000690414	0	0.0331812	0	0.103096	2.57579e-05	0.177552	0.0798035	0.0479842	0	0	0.0311001	0.00394049	0.100459	0.0530279	0	0.00329079	0.0274463	0	0.0192063	0.0168931
ACCTTTCCTTTAGAAG-1	0.279542	0.0102448	0.0630642	0.029349	0.0161026	0.0712131	0	0.000370625	0	2.26605e-07	0.000354505	0	0.0408655	0.0313745	0.000282746	0.0245345	0	0	0.018541	0.241341	0.0103846	0.0100692	0.0291763	0.0866143	0	0.036575	0
ACGAAATGGGCGGCAC-1	0.1285	0	0.00940124	0.00444392	0.0063743	0.0396272	0	0	0.0353477	0.00375354	0.143294	0	0.241369	0.059302	0.0357045	0	0	0.00732525	0.0228903	0.123787	0.0233672	0.018328	0.0139182	0.040141	0	0.0318688	0.011257
ACGACTGGTCATACTC-1	0.179083	0.00947864	0.00160665	0.0218262	0.0108039	9.62065e-07	0.0123166	0	0.0187285	0	0.0523573	0	0.131624	0	0.0152672	0.00621975	0	0.00738586	0.00671993	0.045287	0.145042	0	0.103088	0.0806623	0.099625	0.0528781	0
ACGAGAACCCATCACG-1	0.153357	0.00311285	0.000223216	1.87691e-06	0.031812	0.0200683	0.0173313	0	0.00959777	0	0.171444	0	0.305168	0.0463283	0	0	0	0.0342982	0.0221443	0.0661629	0.0412135	0.00666959	0.0221551	0.0213769	0.00262464	0.0240754	0.000834634
ACGAGATATTTGCTTA-1	0.242672	0	0.122792	0.0838833	0.0113692	0.0824329	0	0.0278885	0	0.0105913	0	0	0.010987	0	0	0.0190891	0	0	0	0.0608959	0.0389595	0	0.0629885	0.148578	0.0204181	0.0564542	0
ACGAGGATACCACTCT-1	0.145318	0.0112457	0.123187	0.0439457	0	0	0	0	0.0163701	0.0252711	0.0638658	0.0492266	0.170476	0.0742359	0.0311749	0.0357432	0	0.0191265	0	0.0950399	0.00149975	0	5.32834e-07	0.0463143	0.0114611	0.0364985	0
ACGAGGTTTACAACGT-1	0.144053	0.0108939	0.00460093	0.0388477	0.0132361	0.0115172	0.167785	0.0777812	0.0945869	0.1311	0.0166103	0.00614605	0.0273883	0	0	0.00801382	0.000987155	0.0135605	0	0.0352084	0.09681	0	0.0147966	0.0248175	0.00461663	0.0491235	0.00751883
ACGAGTACGGATGCCC-1	0.311358	0	0	0.0515485	0.0177081	0	0.0144107	0.00139407	0	0.00488207	0	0.0185194	0	0	0.0257738	0	0	0	0	0.101674	0.0979758	0	0.0656014	0.206372	0	0.048964	0.0338172
ACGATACATAGAACTA-1	0.247712	0	0.00321638	0	0.0220851	0	0	0	0	0	0	0.0134252	0.0233161	0	0	0.0145088	0	0.0203074	0.0228931	0.239336	0.236166	0	0	0.107515	0.0191638	0.0303547	0
ACGATCATACATAGAG-1	0.18195	0	0	0	0.0191176	0	0.0114796	0	0	0	0	0.0198552	0	0	0.0180863	0.0389184	0	0.0057558	0.018998	0.114313	0.364833	0	0.0154658	0.0995372	0.0447371	0.0383722	0.00858122
ACGATCATCTTGTAAA-1	0.207666	0.00504831	0	0.00786926	0.00990756	0	0	0.026587	0.0172824	0.0148464	0	0	0	0	0	0.0151622	0	0.0415325	0.0350822	0.163963	0.0502372	0.017971	0.0873101	0.236387	0.0344463	0.0287021	0
ACGATGCATATGTTAT-1	0.27447	0	0.11524	0.00979327	0.0158417	0.00239819	0.0330177	0.0296231	0	0	0.0126582	0	0	0.000165642	0	0.00543152	0	0.0111862	0.0166385	0.102135	0.181263	0.00554316	0.0130348	0.0622045	0.0634453	0.0459101	0
ACGATGGATCCGATGC-1	0.158764	0.0038294	0.133901	0.0936427	0.0244696	0.154654	0	0	0	0	0	0	0.00938838	0	0	0.0171267	0	0	0.00913235	0.161304	0.05453	0.00146982	0.044998	0.0745615	0	0.0582283	0
ACGCAAACTAATAGAT-1	0.364886	0	0	0.0599588	0.038003	0.12066	0.0320698	0	0	0	0.0312098	0.0521453	0	0.00284005	0	0.0188205	0.011592	0	0.0562829	0.0426327	1.21974e-05	0.000872074	0.0661893	0	0.00644252	0.0676197	0.0277633
ACGCAATCACTACAGC-1	0.316631	0	0.0259236	0	0.0302797	0.00789917	0.0254503	0	0	0.00508905	0	0.0177716	0.0138362	0	0.0215087	0.0124487	0	0.0251713	0.0246103	0.105476	0.0570161	0.00668553	0.0318917	0.213538	0.0280931	0.0306798	0
ACGCATAAATGACATG-1	0.221541	0.0101368	0	0.0122802	0.0130131	0.0108563	0	0.028903	0	0.0318202	0	0	0	0	0	0	0	0	0.0122397	0.0610259	0.112369	0.0323322	0.0991192	0.233499	0.02192	0.0478846	0.0510604
ACGCATTCGTGAGTAC-1	0.245555	0	0.0398364	0	0.0282261	0	0.0898268	0	0.016496	0	0	0	0	0	0	0	0	0.10196	0.0463602	0.0961095	0.239118	0.00337331	0	0.0119311	0.0807369	0	0.000470454
ACGCCAGATGATTTCT-1	0.158281	0	0.0585856	0.0111426	0.00986533	0.0206948	0	0.0198278	0	0.0109068	0	0.0132243	0	0.0352181	0	0	0	0.029181	0.0144068	0.414694	0.0607489	0	0	0.10832	0	0.0349021	0
ACGCCCAGCTGTCGAT-1	0.178117	0	0.128184	0.103023	0.0162935	0.156079	0	0.000263676	0	0.00765466	0	0	0.0249071	0	0	0.0024548	0	0.00666323	0.0104455	0.0808588	0.0684468	0	0.0460593	0.113332	0.0119865	0.0452307	0
ACGCGAAGTCAGACGA-1	0.283215	0	0.0181344	0.0367339	0.0281778	0	0.039977	0	0.0334416	0	0	0.0199801	0	0	0	0.00792137	0.0119781	0.0460347	0.0268968	0.0676939	0.282079	0	0	0	0.0977361	0	0
ACGCGCTACACAGGGT-1	0.308118	0.0191429	0.255691	0.0423342	0.0313025	0	0.00266606	0.0018397	0.000479374	0	0.0265074	0	0	8.46341e-05	0	0.0036597	0	0.0160913	0.0141192	0.0600672	0.0659823	0.0442081	0.0327403	0.0553438	0	0.00696441	0.0126582
ACGCGGGCCAAGGACA-1	0.290942	0	0	0.0230749	0.00355559	0	0.0752264	0	0.0126147	0.016804	0	0	0	0	0	0.0164428	0	0.0356957	0.0255879	0.109657	0.262474	0	0	0.0216041	0.0931216	0.0132001	0
ACGCTAGTGATACACT-1	0.299422	0.00334126	0.00441041	0	0.0335875	7.8337e-06	0.00411073	0	0	1.73345e-06	0	0.0465233	0.0202609	0	0	0.0229645	0.00964041	0	0.0282458	0.124822	0.0903767	0.0274571	0.0385645	0.191789	0.0185709	0.0191773	0.0167256
ACGCTGTGAGGCGTAG-1	0.206985	0	0.00132926	7.99916e-06	0.00831873	0.0194664	0.0837195	0.0447317	0.139614	0.0987426	0.116086	0	0.0315439	0.0149851	0	0	0	0.0111022	0.0316839	0.0450555	0.0943157	0	0	0.0332107	0	0.0191013	0
ACGCTTAGTGTCTCTC-1	0.363364	0	0.0929334	0.0829544	0.0239543	0.0540263	0	0	0	0.0115163	0	0	0.00997885	0.0114195	0	0	0	0	0.0179674	0.0305845	0.0235916	0.01241	0.0116692	0.148926	0	0.0661753	0.0385287
ACGGAATTTAGCAAAT-1	0.248746	0.00941089	0	0.00178508	0.016154	0	7.18718e-05	0.000213889	0.0786661	0.0904081	0.212169	0	0.0320979	0	0	0.0127061	0	0.0378818	0.0281988	0.0751732	0.0587127	0.00290021	0.0497585	0.044946	0	0	0
ACGGACTCTCAAAGCG-1	0.382573	0	2.01941e-06	0.00988318	0.0217856	0	2.92901e-05	0.0249227	0.0236893	0.0236076	0.00850449	0.00886316	0.0123646	0.00411638	0	0	0.000722696	0	0.0293087	0.115969	0.11823	0	0.00342895	0.118348	0.0538309	0.0398205	0
ACGGAGCGCAAATTAC-1	0.275129	0	4.14512e-06	0	0.0136212	0	0	0.020363	0.0153108	7.42809e-07	0	0	0.0138207	0.00259203	0.00335732	0.0172473	0	0.00267341	0	0.0778935	0.0287777	0.0376657	0.0749432	0.258234	0.0408996	0.0733606	0.0441064
ACGGATGGTGCGGATA-1	0.400277	0	0.0151538	0	0.0286354	0	0	0	0.00992972	0.00927456	0	0	0	0	0	0.00565294	0	0.00760256	0.0235331	0.152527	0.188238	0.0181896	0	0.104407	0.0210288	0.0136231	0.0019285
ACGGCACTTGCTTGGG-1	0.279734	0	0.0128047	0.0386034	0.0236236	0	0.0431088	0	0.0268617	0	0	0	0	0	0	0	0.0293183	0.07682	0.0223525	0.0682847	0.261609	1.79405e-07	0	0.0302919	0.0648901	0	0.021698
ACGGCCAACATGGACT-1	0.26572	0.00258749	0.030231	0.0482994	0.00587809	0	0.0731209	0.0413637	0.000156098	9.3942e-07	0	0.0159965	0	0	0	0	0.00900405	0	0.0203398	0.110352	0.183544	0.0227351	0.0331315	0.00518284	0.0703919	0.0311044	0.0308603
ACGGCGACGATGGGAA-1	0.280375	0	5.09143e-06	0.0148996	0.0203187	0.0108306	0	0.00480145	0.0065939	0.0266398	0	0	0	0.0180279	0.0125441	0.0122689	0	0.0131315	0.0103353	0.16494	0.165656	0	0.0197153	0.167009	0.0328733	0.0190347	0
ACGGCGGGTTGCCCTG-1	0.163256	0.00905107	0.01278	0.0356746	0.0138894	0.00444958	0	0	0.0524713	0.0378019	0.215408	0	0.055544	0	0.0028408	0.00952182	0	0.0443699	0.0189579	0.133897	0.0768274	0.0017335	0.0663771	0.0312023	0	0.0139454	0
ACGGCTGGATGTAGAA-1	0.219774	0	0.0191076	0.00326561	0.0023891	0.295089	0.18498	0.00784943	0.015216	0	0.0364574	0	0.0191704	3.40204e-06	0	0.0212562	0	0.00491913	0.0113935	0.0143757	0.0405437	0.00872893	0.0248306	0.0119335	9.77965e-07	0.0419484	0.0167677
ACGGGAGTGTCGGCCC-1	0.124611	0.00604356	0.546311	0.0891398	0.0033883	0.0138208	0	0	1.98278e-05	0.0127923	1.94338e-06	0	0	0.0383106	0	0.0352027	0	0	0	0.00600506	0.0635154	0	0.00938086	0.0181876	0.00510618	0.0244417	0.00372131
ACGTACAGATTTCTCT-1	0.174829	0	0.0609681	0.00654794	0.0108331	0.10781	0	0	0	0.00231981	0	0.0142877	0	0.00724814	0	0	0	0	0.0172528	0.458309	0.0215941	0.00289701	0.0136564	0.0658138	0.0163375	0.0192956	0
ACGTACTTTGGCACGG-1	0.150995	0	0.0197128	0.0345075	0.00448848	0.115633	0.117292	0.117132	0.0363056	0.0127006	0.0143243	0.00827503	0.0174679	0.0744575	0	0	0	0.011174	0.0347293	0.0224585	0.0465219	0.00212172	0.0666142	0.0442198	0.0156072	0.0289035	0.00435719
ACGTAGATTGCTGATG-1	0.239843	0	0.0232851	0.0059407	0.0101901	0	0.0533815	0	0	0.0227413	0.000623712	0	0	0	0	0	0.0100797	0.051894	0.0378586	0.13433	0.245636	0	0	0.0103734	0.111562	0.0225335	0.0197264
ACGTAGGAGAGTCGCT-1	0.338015	0	0	0.038471	0.0150312	2.41093e-06	0.0212256	0.028795	0.0192356	0	0	0.00515268	0.00218391	1.01879e-06	0.0383131	0.0185414	0	0.00467533	0	0.263193	0.0202779	0	0.0277758	0.0969637	0.0275173	0.0346285	0
ACGTATTACTCCGATC-1	0.165706	0	0.0271861	0	0.0114053	0	0.0151445	0.00438225	0	0	0	0.0630726	0	0	0.0188401	0.0350237	0	0.00121273	0.0262722	0.186347	0.195217	0	2.78412e-06	0.146161	0.0664423	0.037585	0
ACGTCCTAAACGAGAT-1	0.262274	0	0.0214324	0.0343462	0.0110064	0.0160979	0.00846521	0.0389194	0	0.000955663	0.0263278	0.0180636	0.0322394	0.0109348	0	0	0	0.0077266	0.00668656	0.293706	0.00673004	0	0	0.0735536	0	0.0997035	0.030831
ACGTCTCGTTCCGGGA-1	0.140197	0.0130332	0.0120056	0.00553254	0.00378959	0.399733	0.12217	0.00175075	0.00889069	0.00209938	0.0478335	0	0.0104173	0.0168453	0	0.00784735	0	0	0.0204309	0.0202563	0.0254586	0.0303493	0	0.0332969	0	0.0600198	0.0180429
ACGTGACAAAGTAAGT-1	0.24417	0.000464397	1.83711e-07	0.0107473	0.0115763	0.313904	0.0990569	0.000399557	0.00512554	0.0148015	6.2211e-06	1.5269e-06	0.000420031	0.0534818	0.000224436	0.00842512	0	0	4.83506e-07	0.0259206	0.0382888	3.85628e-07	6.19849e-07	0.0680338	8.55045e-07	0.104949	3.21699e-07
ACGTGCGCCTCGTGCA-1	0.223683	0	0.130934	0.0596906	0.00530841	0.153761	0	0	0	0	0	0	0.0326554	0	0	0.00949272	0.0070887	0	0.00719591	0.159616	0.0468963	0.0103581	0.028496	0.0749606	0	0.0498626	0
ACGTGGTCGAATGTGC-1	0.226426	0	0.137906	0.115342	0.00912625	0.096121	0	0	0	0	0	0.00214013	0.0220643	0.000999824	0	0	0.0257163	0.00403738	0	0.0364319	0.0540962	0.0105631	0.0160031	0.131285	0.0317268	0.0616443	0.0183704
ACGTTAATGTCGAAGA-1	0.233627	0	0.0240903	0.0052737	0.0149899	0	0.084298	0	0.00818335	0	0.0227449	0	0	0	0.00615114	0	0	0.0925726	0.0471658	0.153958	0.189861	0.00106517	0.00135991	0.00111476	0.0622131	0.0258767	0.0254549
ACGTTAGATTTGCCCG-1	0.156894	0	0.380471	0.0920071	0.0166562	0	0.0223097	2.0636e-05	0.0067036	0	0.0180483	0.015699	0.015439	0.0585916	0	0	0	0.005644	0.0170792	0.031059	0.0470713	0.0133327	0.0316034	0	0.0113399	0.02633	0.0337009
ACGTTATTGGTCACTC-1	0.166748	0	0	0.00305841	0.0107238	0.429014	0.144512	0.00663338	6.24034e-07	1.52795e-06	0.0479277	0	0	0.0128681	0	0	0	0.0139501	0.00682021	0.0105641	0.0742914	0.00447454	0.004629	0.0121789	0	0.0434483	0.00815535
ACGTTCCGCGCTCCGT-1	0.189832	0	0.115068	0.0674028	0.0255557	0.185997	0	0.024703	0.000522348	0.0155817	0	0	5.76601e-05	0	0	0.0169094	0.00868716	0.00874752	0.0200422	0.0783446	0.062816	0.024221	0.0314563	0.0774056	0.00269645	0.0439542	0
ACGTTCGCAATCAATT-1	0.276686	0	0.0206132	0.000436086	0.0169531	3.2291e-06	0	0	0	0.0150564	0	0	3.91457e-06	0	0.0314099	0.0326758	0	0.00731067	0	0.0757686	0.0798287	0.0181529	0.125006	0.226832	0.0321628	0.0411003	0
ACGTTCGTTCAGGAAA-1	0.35659	2.12475e-05	0	0.1734	0.0451364	1.53657e-05	0.0458607	0.0117108	2.50755e-07	0.0190377	0.0469527	0	0	0.0206133	1.60279e-06	0.0360261	0.0293562	7.01759e-06	0.048016	0.0576705	0.0231288	7.92204e-07	6.088e-06	0.0157498	4.18394e-07	0.0341973	0.0365006
ACGTTTAGTTGTGATC-1	0.278629	0	0.0455386	0.0708069	0.0234809	0.107609	0	0	0	0	0	0.00719035	0	0	0.00173711	0	0.00110882	0	0	0.271835	0.0601243	0	0	0.0604605	0	0.071479	0
ACTAATACGTCAGGCG-1	0.218468	0	0.0742967	0.0488621	0.00282116	0.0163527	0	2.02841e-06	0	0.0451531	0	0.0145303	0.0185585	0.0194903	0.0266012	4.67862e-06	0	0.00456145	0	0.0492537	0.0181611	0.0290282	0.0545028	0.275438	0.0193127	0.0415563	0.0230451
ACTACAAAGAGAGGTG-1	0.240386	0	0.00401724	0.0162343	0.0215362	8.79601e-07	1.28017e-05	0.0498571	0.0389694	7.05238e-06	1.42284e-05	0.0302616	0.00399422	0	0.00966445	0.0188066	0.00366962	0	0	0.0781801	0.0601241	0.0125203	0.101074	0.18946	0.0165868	0.0668195	0.0378041
ACTACATCCCGACAAG-1	0.205826	0	0	0.00340207	0.00837936	0	0.0936796	0.0169694	0.104889	0.124419	0.028203	0.0444398	0.0382916	0.00517253	0	0	0	0	0.0301446	0.0261833	0.124696	0	0.0377466	0.0265326	0.0516144	0.0294108	0
ACTACGCGTTAGAATT-1	0.377031	0	0	0.0188697	0.058007	0.00392463	0.0112625	0.0053051	0	0	0.0109113	0	0	0.0137301	0.0267204	0.0055207	0.0619049	0.00123586	0.00932765	0.12778	0.0290062	0	0.0943588	0.0533572	0.0237257	0.0511145	0.0169069
ACTATATGCTGTGTTC-1	0.202901	0	0	0.00107704	0.00742565	0	0.00686764	0	0	0.0167227	0	0	0.00806239	0	0.021983	0	0	0.00862847	0.00266392	0.161002	0.127213	0	0.0499432	0.235375	0.0565338	0.0538146	0.0397877
ACTATCCAGGGCATGG-1	0.251898	0	0.01421	0.0297125	0.00752706	0	0.00649747	0.00866292	0.0157192	2.28881e-06	2.26642e-06	0.00825347	0	0	0.0174456	0	0.00145346	0.0103589	0.0135363	0.0718628	0.13339	0.0143105	0.0441458	0.228123	0.0643324	0.0380616	0.0204934
ACTATGTCCAGCTGCC-1	0.15969	0	0	0	0.0137113	0.0100396	0	0	0	0	0.0642612	0.00180339	0.310852	0.160404	0.0358776	0	0	0.0175318	0.0115062	0.0246971	0.0769458	0.00391803	0.0355369	0.0232098	0	0.0460852	0.00393016
ACTATTCGTCCGTGGT-1	0.188158	0.00752503	0.139969	0.0975578	0.032286	0.0873313	0	0.0113782	0	0.0203833	0	0.00105216	0.00636104	0	0	0.0400538	0.00852184	0	0	0.0917766	0.0434863	0	0.0457355	0.0847495	0.0447103	0.0489645	0
ACTATTTCCGGGCCCA-1	0.341308	0	0.000416349	0.203291	0.0315279	0.013671	0.0652559	0.00542582	0.00104927	0	0.0623097	0.0299362	0	0.0067156	0	0	0.019632	0.0130472	0.0239884	0.0511627	0.0117234	0.00256335	0.00636237	0.046114	0.000429418	0.0155763	0.0484938
ACTCAACGAATGTATT-1	0.221188	0	0.00387495	0.00427276	0.0146575	0.0198604	0	0	0	0	0.14261	0.0155763	0.172359	0.0114892	0.0110215	1.20802e-05	0.0095221	0.155446	0.0425792	0.0772101	0.0727602	0.00546982	0	0.0135902	0	0.00650137	0
ACTCAATAAAGGCACG-1	0.242855	0	0	0	0.0192188	0	0.00565996	3.22489e-06	2.05276e-05	0.00924697	1.49834e-06	0.0170558	2.19396e-05	0	0.0267827	0.0173928	0.0118922	0.0125427	0	0.119387	0.368464	0	0	0.081464	0.0334782	0.0345127	0
ACTCAGACCTGCTTCT-1	0.188716	0	0.0212308	0.0234727	0.000249372	0.0939311	0.0021117	0.00416668	0	0	0	0	0.00678857	0	0	0.0166797	0	0.000328561	0.0516531	0.472743	0.0258077	0.00140951	0	0.0423248	0.0161916	0.0321958	0
ACTCATGGCAGCCTTC-1	0.222383	0	0	0.0131037	0.0106646	0.049061	0.309028	0.0648701	0.0835873	1.03503e-05	0.015096	0.0125882	0.00991211	0.000102549	0.00318624	0	0	0.00255933	0.00961752	0.0233971	0.0546814	0.00707831	0.000101017	0.0313102	0.0263018	0.0398856	0.0114746
ACTCCAATATCATCAT-1	0.209722	0	9.95124e-08	0.0359163	0.0161164	0.00357477	0.0150291	0.00274941	0	0	0.00753009	0.010972	0.0289755	0	0.0215506	0.00821109	0	0	0.0248762	0.48633	0.0181759	0.00450573	0.0299741	0	0.0331939	0.0425963	0
ACTCCCATTCCTAAAG-1	0.111824	0.0155389	0.0333052	0.000427179	0	0.0193169	0.0452923	0.0169374	0.0404251	0.014071	0.124226	0	0.219387	0.114146	0.0469287	0.00603298	0	0.0150112	0	0.0666742	0.0422399	0	0	0.0165288	0	0.0310005	0.0206865
ACTCCCGAATTCGTTT-1	0.30603	0	1.00429e-06	0.0215598	0.0370207	0.00599482	0.0105316	0	0	0	0	0	0	0	0.028022	0.0219743	0.0100619	0	0	0.103477	0.0982575	0.0121005	0.0575182	0.206552	0.0140219	0.0668763	0
ACTCCCTAATGCTAAA-1	0.238889	0.00711398	0.00760139	0.0144292	0.00815908	0.00930389	0.0211851	0.0281719	0.0162094	0.00303046	0	0.00624258	0	0	0.0141387	0.00363018	0	0.0249298	0.020515	0.142882	0.0927503	0.0227674	0.084987	0.170102	0.0476247	0.0153367	0
ACTCCCTAGAATAGTA-1	0.296585	0	0	0.0262058	0.0125106	0.00329943	0.0485088	0.0250273	0.0224221	0.00552447	0	0	0	0	0	0.0214334	0.0115774	0.0269427	0.0374123	0.210005	0.155284	0	0.0154702	0.0583067	0.0234835	5.29884e-07	0
ACTCGATGTATTTCAT-1	0.284049	0.00045055	0	3.80357e-05	0.00583368	0.320941	0.0762682	0	0	0.00386038	0	0.0111916	0.000591289	0	0	0.0451289	0.0248256	0.0278168	0.0225784	0.03022	0.0658655	0.0119819	0.0157533	0	0	0.0356816	0.0169244
ACTCGTAACCCGTCCT-1	0.244295	0	0.396466	0.0409403	0	0.00787443	0	0	0	0.0171492	1.18331e-05	0	0.0214916	0.0326891	0	0.0226537	0	0	0.028687	0.0243904	1.01115e-05	0	0.0270348	0.0705239	9.43443e-07	0.0657817	0
ACTCGTCAGTAATCCC-1	0.264335	0.00061035	0.000738149	0.000242907	0.0114487	0.0249468	0.0457803	0	0.000501982	0.0130023	0.00724339	0	0.0141016	0.00717829	0.00579686	0	0	0.043769	0.0544243	0.203966	0.183637	0	0	0.0193861	0.0805786	0	0.0183116
ACTCTCTGACTTAGGT-1	0.284456	0	9.35747e-06	0	0.0094013	0	0	0.0182318	0.0080633	0.0185637	0.0109384	0.0195128	0.0146585	0	0	0.016417	0.0263264	0.0423376	0.0309214	0.202	0.201868	0	0	0.0574945	0.026623	0.00291794	0.00925929
ACTCTCTTATACACGA-1	0.416373	0	0.0314326	0.0377432	0.00730495	0.0144221	0	0.00399865	0	0.0248369	0	0.00277657	0	0	0.021067	0	0	0	0.011398	0.0328742	0.0427093	0.00540868	0.0473145	0.180478	0.0311488	0.0887141	0
ACTCTTGTATAGTAAC-1	0.27923	0	0.0170207	0.00410038	0.0144385	0	0.0778813	0	0.0176717	0.00154461	1.96716e-06	0.0140518	0	0	0	0	0	0.0213184	0.0476827	0.103819	0.253619	0	0	0	0.12064	0.00780645	0.0191739
ACTGAATGGCGAAAGT-1	0.200557	0	0.0353139	0.00243525	0.0111619	0	0	0	0.0580293	0.0431455	0	0	0.00254911	0	0	0.0365221	0.00144819	0.0652874	0.00986026	0.111728	0.177048	0	0.00896196	0.182549	0.0426271	0.0107745	0
ACTGATTTAGTGATTC-1	0.399714	0	0.0593955	0.0642945	0.00565116	0.0184498	0	0.0262359	5.77026e-07	0.00211544	0	0	0.0250509	1.00225e-05	0	0	0	0	0.0171279	0.0810823	0.0293923	0.00224007	0.00903342	0.126792	0.0259296	0.0782908	0.0291939
ACTGCCCGCCATTCTC-1	0.136462	0.00263661	0.0440205	0.0398603	0.00273354	0.00383847	0	0	0.0310524	0	0.072767	0	0.184896	0.181174	0.0237214	0.00255913	0	0.0185726	0.0434387	0.0303286	0.0561775	0.000321773	0.0845122	0.0168857	0.0148483	0.00919435	0
ACTGCCGTCGTAACTC-1	0.202076	0	0.104896	0.0703906	0.0341991	0.122663	0	0	0	0.0306546	0	0	0.00916268	0.0134647	0.00825818	0.0261187	0	0.00282457	0.0237483	0.13678	0.0873469	0.0083159	0.0126082	0.0766739	0	0.0298195	0
ACTGCTCGGAAGGATG-1	0.203058	0	0	0.0171363	0.00417902	0.16931	0.252883	0.0489774	0.0297949	0	0.0418891	0	0.000710225	0.000325143	0	2.54851e-06	0	0.016115	0	0.01009	0.0902344	5.34358e-05	0.0201193	2.19311e-06	0.0224578	0.0484277	0.024234
ACTGTACGATACACAT-1	0.27472	0	0.0322829	0.00162849	0.0385376	0	0.0307167	0	0	0	0	0.018887	0	0	0.000238196	0	0	0.068593	0.0426901	0.154042	0.209352	0	0.0128419	0.0189525	0.0638977	0	0.0326202
ACTGTAGCACTTTGGA-1	0.322584	0	0.00650413	0.0241846	0.0948009	0.0412506	0	0	0	0.0472975	0	0.00832589	0.00413031	0.000673062	0	0	0	0	0.244925	0.1617	0.0319787	0	0	0	0	0.0116452	0
ACTGTATACGCGAGCA-1	0.171545	0.0101025	0	0	0.0027486	0	0	0	0.0343721	0	0.113106	0	0.189076	0.113591	0.0582728	0.0244029	0	0.0294562	0.0425267	0.142863	0.0390516	0	0	0.0288864	0	0	0
ACTGTCCAGGATTATA-1	0.176152	0	0.0228982	0.018337	0.00763568	0	0.0637276	0.0405906	0.00259387	0.0256092	0	0.0152438	0	0	0	0.00176538	0	0.0213085	0	0.105481	0.260334	0	0	0.0488247	0.125898	0.0615825	0.00201726
ACTGTCTTCTTTAGAA-1	0.192788	0	0.00947245	0.0156414	0.00721177	0	0.069122	0	0.046215	0.00874397	0.0133327	0.0172208	7.13527e-05	0.00500447	0	0.0143539	0.00763533	0	0.0207885	0.0694869	0.290752	0	0.0094031	0.0285333	0.13367	0.0405533	0
ACTGTGCTAGTAGATC-1	0.130266	0.00516148	0.0238812	0.0086617	0.00826749	0.00749791	0	0	0.0164283	0.00947409	0.206738	0.00294828	0.132607	0.0117469	0.00510259	0.0117652	0.00743892	0.0641304	0	0.0476937	0.227261	0.0109151	0.0201179	0.00776886	0	0.0341282	0
ACTGTTTAGTGTAGGC-1	0.223717	0	0.124452	0.0598988	0.00587321	0.111805	0	0	0	0.0407194	0	0.0248754	0	0	0.0108426	0.00479693	0	0.0408905	0	0.11884	0.0420521	0.0247529	0.0181895	0.107461	0	0.040833	0
ACTTACCGGGCGCGCA-1	0.286214	0	0.0469	0.0359636	0.0114528	0	0	0	0	0.00597753	0	0	0.0253938	0.0498409	0	0	0	0.00157346	0.00774697	0.0424492	0.0398743	0.00332786	0.0597956	0.253424	0.0548794	0.044015	0.0311711
ACTTACGCATCCACGC-1	0.374986	0	0.0107642	0	0.0150983	7.70678e-06	6.09787e-06	0.0207375	2.62831e-07	0.000242731	0	0.00728772	0	0	1.46368e-06	0.00386201	0	0	0.0327013	0.158507	0.155699	0.0189178	0.0488347	0.123691	0	0.0286553	0
ACTTAGTACGACAAGA-1	0.183121	0	1.90436e-05	0.0215479	0.0232015	0.0112127	0	0	0	0	0.158515	0.00754394	0.162724	0.0550637	0	0	0	0.0991351	0.0326812	0.100218	0.0679487	0	0.00785102	0.0406136	0.00327681	0.0253261	0
ACTTATACTTACCCGG-1	0.249898	0	0.0161935	0.0050571	0.0106023	0	0.0144301	0.017102	0.00734501	0	0	0	0	0	0	0.0455987	0	0.00250945	0.0220058	0.145305	0.0605679	0.0204396	0.0497946	0.211702	0.0837874	0.0376621	0
ACTTATCTGATCTATA-1	0.181767	0.00273832	1.01003e-05	0.0122934	0.00644669	0.000902694	0.00835827	0	0.0611181	0	0.236727	0.00875457	0.0823204	0	0	0	0.0112898	0.0734048	0.0225139	0.0441998	0.119298	0.00234209	0.0780927	0.0149744	0.00637354	0.0260742	0
ACTTATTAGGATCGGT-1	0.247037	0	0.0289786	0	0.0223654	0	0.0790476	0.0161285	0.0308827	0	0.00286797	0.0100614	0	0	0	0	0	0.0256226	0.0305849	0.135734	0.233651	0	0	0.0120483	0.0768244	0.0358422	0.0123228
ACTTATTTATGTGCCA-1	0.262506	0	0.0291663	4.47553e-06	0.0179391	0	0.000287675	0	0	0.0150579	0	0	0	0	0.00278345	0.0359715	0	0.0288915	0.0464544	0.174615	0.217737	0	0.0240981	0.0945745	0.0243347	0.0255778	0
ACTTCAGGCTGATCCC-1	0.247379	0.00178879	0.012084	3.98277e-06	0.0142136	0	1.54859e-06	1.3332e-06	0	2.52749e-06	0	1.31341e-07	0.0470904	1.72264e-06	0	0	0.0234109	0.0133929	0.0261207	0.120252	0.317775	2.82351e-07	0.0139896	0.135801	0.0205057	0.00618411	0
ACTTCCAGTGGAAGCT-1	0.357829	0	0.0201169	0	0.0567207	0.243489	0.0700724	0.00630722	0	0.00845282	0.0268082	0.018715	0	1.55538e-05	0	0.0133433	0.0265163	0	0.0140067	0.0205948	0.024688	0.0183654	0	0.0376247	0	0.0363263	7.48357e-06
ACTTCGCCATACGCAC-1	0.22255	0	0	0	0.0254026	0	0.0170513	0	0.0179165	0	0	0	0	0	0.0276631	0.0414341	0	0.0139521	0.0336433	0.156583	0.302609	0	0.0267809	0.0852407	0.0231241	0.00603546	1.38877e-05
ACTTGACTCCCTCTTT-1	0.28008	0	0.0342004	0.00605773	0.0419258	0	0.0550274	0	0	0	0	0.0168087	0	0	0.0202762	0	0	0.0228831	0.0300926	0.193798	0.183989	0	0	0.0175726	0.0793298	0.0179585	0
ACTTGCCATATTGTAC-1	0.183003	0.00607562	0.121108	0.0876882	0.0158305	0.196529	6.49007e-07	4.61727e-06	0.0162462	0.0066302	0.0132175	0	0.00826988	7.3225e-05	0.000244537	0.00789543	0.00396529	0.0108763	0.0243223	0.0956124	0.0571841	0.000659935	0.0370644	0.0771173	8.00917e-08	0.030382	0
ACTTGGGACCCGGTGG-1	0.1981	0	0	0.00291638	0.0481823	0.00550889	0.026161	0.000231349	0.00239249	0	0	0	0	0.0167634	0	0	0	0	0.0373132	0.469322	0.091734	0.00383884	0.0234095	0.0313134	0	0.0428139	0
ACTTGTAGTCCCTTCA-1	0.160842	0	0.011501	0.0103377	0.00578684	0.0640412	0.240077	0.125238	0.0641047	0.0276955	0.0641641	0.0109761	0.00512468	0	2.15935e-05	0.00165345	0.0069057	0.0221846	0.0124135	0.0252229	0.0637937	0	0.0272116	0.0172339	0	0.0238593	0.00961133
ACTTTACCCTCATGAA-1	0.367064	0	0	0.0224602	0.00957995	0	0	0.00439349	0.0206208	0	0	0	0	0	0.0267562	0	0	0.0164796	0.00357595	0.160229	0.0829932	0	0.0112469	0.199938	0.0534701	0.0113443	0.00984889
ACTTTCCTATAGCTTC-1	0.21868	0	0.0199273	0.00872046	0.00736215	0	0.0431378	0	0.0400208	0	0.00395538	0.0136625	0	0	0	0	0	0.0500713	0.0287322	0.109873	0.294117	0	0	0.050464	0.0689043	0.0423724	0
ACTTTGACTGCATCCT-1	0.175977	0.00182762	0	2.86925e-06	0.00859468	0.0729607	0.259135	0.133404	0.0828215	0	0.053893	0.00635348	0	0	0	0	0.00583824	0.00882057	0.0209194	0.0344999	0.0428101	0.00222496	0.0134986	0.0318662	0.0130279	0.0315246	0
ACTTTGGTCGTGCTCC-1	0.156664	0	0.0148759	0.0203785	0.00222375	0.111884	0.330276	0.105396	0.0262515	0	0.0182965	0	0	0	0	0	0.010036	0	0.0332742	0.0308098	0.045837	0.00777	0.0291632	0.0315904	0	0.0149503	0.010323
AGAACCCTCAATTGGG-1	0.143125	0	0.0213583	0.0283461	0.00975995	0.427418	0.113906	1.20041e-05	2.2451e-05	0	0.0164303	0	0	0.00655246	0	0.0404987	0	0.0113537	0.0244795	0.0123004	0.0292691	0.0268703	0.00866831	0.0206992	0	0.0589293	0
AGAACGTGGTACATTC-1	0.237503	0	0.0106132	0.00118135	0.0314614	0.0023647	0.0357038	0	0	0	0	0	0.00223864	0	0.0223208	0	0	0.0203652	0.0170257	0.264654	0.261377	0	0	0.0434293	0.0254368	0.0243247	0
AGAAGAGCGCCGTTCC-1	0.28992	0.0188157	0	0.02382	0	2.11329e-05	0.00523476	0.0163073	0.00844133	0.0192764	6.24313e-07	0.0018078	0.00588602	0.00358636	0.00690815	0.00832799	7.62471e-06	0.0158006	2.06464e-07	0.1225	0.179243	0	0.0436578	0.16372	0.0195991	0.0444711	0.00264665
AGAAGGTACACTTCAC-1	0.19783	0.0459338	0.00529765	0.00707306	0.00967051	1.4951e-05	0.0977998	5.80379e-05	0.0558037	0.0580204	0.0723355	0.0136953	0.0945248	0.00296373	0	0	0	0	0	0.0449885	0.0989935	0	0.0864652	0.0460113	0.0105711	0.0518468	0.000102675
AGAAGGTTGCCGAATT-1	0.304038	0	0.031215	0	0.0308004	0	0.100802	0	0.00350145	0	0.0287819	0	0	0	0	0	0	0.00666528	0	0.144971	0.238701	0	0	0	0.0721443	0.0383796	0
AGAAGGTTGTAGGTCG-1	0.281761	0	0	0.0138949	0.0232179	0.00361913	0.0381525	1.18966e-05	0	0	0	0.00898568	0	0	0	0	0	0.0276814	0.0524205	0.27911	0.064415	0.0129993	0.000883667	0.142555	0.0327319	0.0174192	0.000140414
AGAAGTGATTCGTGAT-1	0.263865	0	0.288264	0.129381	0.0137408	0	0.00220588	0	0	0	0.0143197	0	0	0.0267013	0	0	0.0157206	0.0217646	0	0.0416659	0.05432	0	0.00449789	0.0413146	0	0.082239	0
AGAATAAATCTTCAGG-1	0.152557	0	0.0163069	0	0.0116766	0.134229	0.225185	0.0600383	0.0314782	1.20024e-06	0.0676653	0	0	0	0	0.00402036	0	0	0.013749	0.0741726	0.098537	0	0.0237795	0.00795405	0.0247323	0.0408915	0.0130258
AGAATGCGGGTTCGGA-1	0.274315	0	0.0164626	0.00519641	0.00842146	0	0	0.00438465	0.0320633	0.00435208	0.00902358	0.011412	0	0.00127213	0	0	0	0.0162734	0.0292019	0.11893	0.107933	0.00479553	0.037392	0.230344	0.05644	0.0317878	0
AGAATTATGGATTCGA-1	0.312872	0	0.0136152	0	0.0250416	0	0	0	0.0329488	0.00269339	0	0.000629263	0	0	0.00191033	0.0312925	0	0.00625933	0	0.195117	0.0760919	1.29761e-05	0.00446623	0.179792	0.0362639	0.0524467	0.0285476
AGAATTGTTTGACATA-1	0.222469	0	0.00446192	0	0.0154426	0	0.0712617	0.0666667	0.15422	0.0310933	0.133407	0.00599859	0.0162161	0	0	0.00701218	0	0.0199194	0.0338718	0.0437472	0.115341	0.00646262	0	0.0275902	0	0.0248184	0
AGACAGCTCAGAATCC-1	0.18916	0	0	0.00110495	0.0316793	0.380422	0.0968492	0	0	0	0.0570595	0	8.72611e-07	0	0	0	0	0.0186906	0.0343116	0.0394189	0.0788675	0	0	0.0251281	0.018619	0.0255012	0.00318726
AGACATAGATCCTTCC-1	0.232899	0	0.0664694	0.0494304	0.0254086	0.11714	0	0.00495	0.0186422	0.01068	0.00862004	0	0	0.00789628	0	0	0	0.0172852	0.029852	0.271719	0.0153197	0	0.0239072	0.0576276	0	0.029323	0.0128301
AGACCAAACCACACCT-1	0.183091	1.1372e-06	0	6.50981e-07	0	0.172765	0.264126	0.052176	0.017283	0.000383852	0.047195	0	0.0139471	0.0058724	0.00912849	0	1.67244e-07	0	0	0.0301064	0.104729	0	5.70861e-06	0.021898	0.000537547	0.0767543	4.44675e-08
AGACCATGGGATACAA-1	0.173129	0	0.0198666	0	0.00529152	0	0	0	0	0	0.175097	0	0.19089	0	0	0.0141761	0	0.0198695	0.00977521	0.0496482	0.123562	0	0.14352	0.0323114	0.00335669	0.0395072	0
AGACCCACCGCTGATC-1	0.295074	0	0.030289	0.000717677	0.0116531	0	0.0493743	0	0.0110638	0	0	0	0	0	0	0.0159747	0	0.0136427	0.0460787	0.162449	0.230795	0	0	0.0157397	0.0763119	0.0322498	0.00858575
AGACCCGCCCTCCTCG-1	0.292203	0	0.00231594	0.000567986	0.0187273	0	0	0	0	0.0156004	0	0.0319318	2.94185e-06	0	0.0376998	0.0456657	0	0	0.0213264	0.183716	0.225571	0	0	0.0689826	0.0115889	0.0158506	0.0282498
AGACCGGGAAACCCTG-1	0.149558	0	0.0927427	0.00548662	0.018715	0.000470579	0.00308382	0	0.038341	0	0.159723	0	0.19355	0	0.00285003	0.00700042	0	0.0437115	0.0360923	0.0873127	0.0842839	0	0.0148908	0.0232368	0.00425466	0.0286508	0.0060455
AGACGAAGTGCCGGTC-1	0.352497	0.000283576	0	0	0.0142607	0	0	0.0217434	0.0124642	0.0150778	0.00503282	0	0	0	0.0179132	0.00733553	0	0.0562023	0.0657886	0.134555	0.203756	0	0.0395755	0.0422529	2.06574e-05	0.0112409	0
AGACGACGATGCCGCT-1	0.400317	0.0127209	0.0342983	0.194605	0.0247384	0.0167471	0.0196188	1.15085e-06	0.00418814	0	0.0022188	0.0144213	5.14928e-07	0.0249803	0.02261	1.76141e-07	0	0.018503	0.0664879	0.0656703	0.00535796	0	0.0143643	0.00861615	0.00386256	0.0076556	0.0380161
AGACGGGATTGGTATA-1	0.219997	0	0.103734	0.11432	0.0052825	0.10609	0	0	0	0.000494526	0	0	0.0305567	0.0261444	0.00628896	0.0152849	0	0.0100972	0.0219043	0.0597043	0.0327931	0	0.0413272	0.149523	0.0307401	0.0257174	0
AGACGGGCCGATTTAA-1	0.269922	0	0	0.010052	0.010817	0	0	0	0.00262548	0.0186491	0	0.00942705	0.0100674	0	0	0.0121681	0	0.00592526	0	0.0629646	0.0703189	0.0302287	0.0783122	0.272886	0.0478259	0.0491154	0.0386946
AGACTAGCCTTCCAGA-1	0.135446	0	0	0	0.0107788	0.0129561	0	0	0	0	0.000631791	0.00261293	0	0	0	0	0	0.0304017	0.0447302	0.67439	0.0613804	0	0.0044766	0	0	0.0221958	0
AGACTGTTACCGGGTC-1	0.336068	0.00170296	0.00329193	0.0871868	0.0195546	0.108102	0.017957	0	0.0225174	0.0011104	0.0817516	0	0	0.0121042	0	0.0141841	0	0.00543574	0.0215548	0.0494553	0.0363074	0	0.0382451	0.00171062	0.0444478	0.0476306	0.0496814
AGAGAAACACCAGAAA-1	0.228309	0	0.0208574	0.0614792	0.00308371	0.108478	0.0231898	0.0222355	0.063489	0.0574553	0.00718777	0.0578337	0	0.056449	0	0.00282776	0	0	0.018939	0.0314789	0.0756971	0.00198152	0.00222296	0.0806924	0.0539702	0.0105118	0.0116319
AGAGAACCGTCTAGGA-1	0.279894	0.00420459	0.0019142	0.0380746	0.0358686	0	0	0.024167	0	0	0	0.0299247	0.0130918	0	0	0.0138775	0.0103255	0.0251672	0.0190582	0.139523	0.172682	0	0.0149485	0.136344	0.00645076	0.0344845	0
AGAGAAGGAGTACAAT-1	0.254472	0	0.024818	0.0946488	0.0131587	0.00490227	0	0	0	0.0295921	0	0.0302843	0	0	0	0	0	0.0380757	0.0789669	0.0301115	0.0955583	0.00262504	0.00750316	0.0134054	0.266323	0.0155547	0
AGAGATCTCTAAAGCG-1	0.16566	0.0128201	0.0760528	0.0103448	0.0143466	0.0167921	0.00685476	9.07341e-06	0.025923	0	0.181002	0.00512296	0.213938	0.0381733	0	0	0	0.0141363	0.025332	0.0426581	0.0632521	0.00500195	0.0179299	0.0404637	0	0.0241861	0
AGAGCAGTTATGAGAC-1	0.205286	0.00182493	0.0105601	0	0.0237632	0.00115056	0.0224557	0	0.0838453	0.20214	0.110837	0	0.0460413	0	0.0100686	0.00124608	0	0.0139505	0.0136324	0.0749468	0.0812608	0	0.0299633	0.0131721	0.0237902	0.0300652	0
AGAGCGGGCTAATCAT-1	0.245933	0	0.119723	0.0752759	0.0237389	0.134192	0	5.8857e-05	0	0	0	0	4.96349e-06	0.00104697	0	0.0162378	0	0.00205212	0.010977	0.141477	0.0700865	0	0.0125576	0.0828962	0	0.0637424	0
AGAGCGTACAAGCTCG-1	0.18092	0	0.0197153	0	0.00766845	0.0277488	2.45283e-05	0	0	1.12489e-06	0.189257	0.0257516	0.241073	0.0712608	5.35251e-07	0.0205118	0.0214141	0.00119873	0.0653416	0.0525146	0.072586	0	0	0	0.00301189	0	0
AGAGCTACGAAAGCAT-1	0.190258	0	6.8057e-06	2.106e-06	0.0171181	0.449326	0.00709287	0	0.0116042	0	0.0551294	0	0.00777028	0	0	0.0120199	0	0.00500859	0.0279531	0.0225089	0.0235687	0.0981135	0.00111658	0.0196548	0.0173087	0.0344369	2.26797e-06
AGAGGCTTCGGAAACC-1	0.227202	0	0	0	0.00336216	0	0	0	0	0	0	0	0	0	0	0.0162141	0	0.04554	0.0833956	0.529813	1.70755e-06	0	0	0.0394048	0	0.055066	0
AGAGGTATCTCGGTCC-1	0.205236	0	0.0215742	0.0460171	0.0145456	0.0688468	0.00550717	0.00108051	0	0	0.0328903	0.00464604	0	0.000119116	0	0	0	0	0.015434	0.462877	0.0146644	0.00440203	0	0.069184	0	0.0329764	0
AGAGTTAGAGACCGAT-1	0.250499	0	0.115443	0.077719	0.0132046	0.0120288	0	0	0	0	0	0.00135069	0.0495346	0	0.00873333	0	0.0161109	0	0.00554506	0.0309185	0.0569296	0.0193095	0.0246483	0.207524	0.0597789	0.0269018	0.0238202
AGATAACTTCAGGGCC-1	0.218927	0.00311354	0	0	0.0181654	0.00573156	0.00813792	0	0	0	0	0	0	0.044027	0	0.016857	0.0121364	0	0	0.6012	0	0.00272219	0.0257844	0.0008277	0.00145805	0.0409124	0
AGATACCAGCACTTCA-1	0.348101	0.0250845	0	0	0.00646268	0	0	0.0225204	0	0.0129125	0	0.00686785	0.00543046	0	0	0.0283375	0	0.0127617	0.0118028	0.0428576	0.0375582	9.69227e-07	0.108162	0.236974	0.0247227	0.018376	0.0510675
AGATACCGGTGTTCAC-1	0.204198	0.00117494	0.328272	0.069656	0.0101551	0.00649495	0.0459638	0.00505202	0	0	0.00826012	0.014753	0.0150918	0.0460882	0	0	0.00242638	0	0.0208517	0.0639741	0.043979	0	0.0368849	0	0.00322537	0.061921	0.0115778
AGATACGACTTCATAT-1	0.186901	0.0168466	0.0136575	0	0.0135385	2.4651e-06	0	0	0.0246833	0	0.0720367	1.03775e-08	0.163128	0.110163	0.10941	0	0	0.0202967	0.0175366	0.154637	0.00839328	0.000427122	0	0.0585446	0	0.0297971	0
AGATACTCAAGATCGA-1	0.241006	0	0.0317777	0.000386956	0.0112071	0	0.00387921	0	0.0243054	0.0410079	0	0	0.0109557	0	0	0.00907566	0	0.0287254	0.0308942	0.122389	0.221246	0.0245022	0	0.144973	0.0152989	0.0383695	0
AGATATAATACGACTA-1	0.180853	0	0.00857809	0	0.0180498	0	0	0.0365043	0.0665274	0.0175406	0	0.01931	0.00238411	0	0	1.59518e-05	0	0.00135235	0	0.0836933	0.147976	0	0.0672651	0.208669	0.0871036	0.0541775	0
AGATCGTGCATAAGAT-1	0.26412	0	0.0184551	0.0216656	0.0203209	0	6.97402e-08	0.016443	0.00487385	0.00920787	0	0.0253091	0	0	0	0.0492327	0	0.0292598	0.0119892	0.0540655	0.0654107	0.016124	0.0868973	0.244782	0.0259399	0.035904	0
AGATCTCAGGTGTGAT-1	0.212998	0.00687319	9.33984e-05	0.0304299	0.00919122	0	0.0465982	0	0.0150787	0.0126172	4.20832e-05	0.0158944	0.00242062	0.00650846	0.00917794	0.00168961	0	0.0321045	0.0121442	0.141807	0.278261	0	6.25113e-05	0.022024	0.086195	0.0407786	0.0170106
AGATGACTCGCCCACG-1	0.227107	0	0.100392	0.0870927	0.0134739	0.147574	0	0	0	0.0192281	0	0	0.017107	0	0	0.00518555	0	0	0.0540603	0.0910487	0.0417564	0	0.0289393	0.13684	0.0120665	0.0181285	0
AGATGAGGGTTGCGAT-1	0.298173	0	0	0	0.00629528	0	0	0	0	0.0229712	0	0	0.0178019	0	0.0134678	0	0	0.00805027	0	0.0755257	0.0499166	0.012418	0.12477	0.308771	0.0159071	0.0277598	0.0181722
AGATGATGGAGTCTGG-1	0.241448	0	0	0.0102564	0.005961	0	0	0.0166955	0.0165366	0.0143522	0	0.0125931	0	0	0	0.0384933	0	0.0107887	0	0.124247	0.0683079	0	0.0564505	0.254712	0.0748266	0.0543301	0
AGATGCAAGACGTGCA-1	0.217889	0	0.0360006	0.0591637	0.016821	7.26611e-08	0.00398428	0	0	0	0.00279759	0	0.0510114	0.0180553	0.00839439	0	0.0222158	0.0252215	0.0429979	0.327361	0.0476922	0	0	0.0267448	0.0430091	0.0399947	0.0106453
AGATGCATCCTGTGTC-1	0.158723	0	0.0401209	0.00717526	0.0236411	0.308906	0.172488	0.00487687	0.00367787	0	0.00322322	0	0	0.00355574	0	0.00963105	0	0.000319736	0.0139886	0.014088	0.0792391	0	4.13348e-07	0.0481756	0.0260536	0.0821161	0
AGATTATAGGACGTTT-1	0.284214	0	5.26678e-06	0	0.013949	0	0.0157586	0	0.00737513	0.00117553	0.0216607	0	0	0.0101254	0	0	0	0.0136111	0.0494586	0.193317	0.228323	0	0	0.0297266	0.107383	0.023917	0
AGATTCAAGCGGGTCG-1	0.216458	0	0.0762072	0.124809	0.0227404	0.0735266	0	0	0	0.0293387	0	0	0.0209054	0	0	0.0167926	0	0	0	0.0307814	0.0625737	0.0195123	0.036928	0.166213	0.0267843	0.0691191	0.00731137
AGATTCACAACCGATA-1	0.159655	0	0.0396846	0	0.00484884	0.0152028	0.143657	0.0343573	0.0549396	0.125318	0.0602654	0	0.0764477	0	0	0	0	0.000914286	0.0267896	0.0223002	0.107378	0	0.0481867	8.37591e-06	0.0608493	0.0191978	0
AGCAAAGGCCGCTAGT-1	0.310518	0.00192261	0	0	0.0121363	0.0276467	0.0074629	0.0244474	0.014736	0.020935	0	0.00352263	0	0	0	0	0	0.0088735	0	0.192784	0.12554	0	0	0.109056	0.0684305	0.0643325	0.00765572
AGCAACATATCTTATT-1	0.278842	0	0.0106545	0	0.0336844	0	0	0.0161487	0	0	0	0.0428161	0.00220776	0.0106272	0.0235105	0.0262959	0.0109494	0	0.0208579	0.0811278	0.197614	0.0309917	0	0.115525	0.0679755	0.0301717	0
AGCAACCGAAAGTAAT-1	0.129834	0.0175675	0.0587427	0	0.00511216	9.77791e-06	0	2.04772e-07	0.024773	0.0487444	0.0599072	0	0.288241	0.087851	0.109512	0	0	0	0.029202	0.0525312	0	2.0245e-07	0.0560193	0	0.0246214	0.00733149	0
AGCACACGTTTAGACT-1	0.135359	0.025998	0.0133274	0.0137203	0.00593894	0.0182215	0	0	0.0441745	0.0122417	0.0618999	0	0.3313	0.125869	0	0	0	0	0.0352866	0.0405308	0.0385559	0.0170507	0.0249714	0.0555543	0	0	0
AGCACCAGTACTCACG-1	0.266653	0.00244005	0.0118829	0	0.00756284	0	0	0	0	0	0	0	0	0	0.0213672	0.00630976	0.000842812	0.0154571	0.0124092	0.285083	0.280041	0	0.0121522	0.0274184	0.0270197	0.0233609	0
AGCACTACCGGCCTGT-1	0.244925	0	0.0168847	0	0.00993393	0.0110381	0.0226706	0	0.00739887	0.0175796	0.203243	0	0.163648	0.0417908	0	0	0	0.0492638	0.0203823	0.0495496	0.085743	0.00418221	0.0104865	0.0221982	0	0.0190815	0
AGCACTACCTCACCAG-1	0.33082	0	0	0	0.0112313	0	0.00368229	0	0	0.0265938	0	0.0160982	0.00392545	0	0	0.0244527	0.00671366	0.000606229	0.0197369	0.171349	0.279694	0	0	0.0629118	0.0124156	0.0181515	0.0116173
AGCAGAAGGAGAAAGA-1	0.263489	0.00415044	0	0.00887617	0.00833793	0	0.0118576	0.0332034	0.0282134	0	0	0.0121462	0	0	0	0	0	0.00715871	0.0175523	0.118041	0.171566	0	0.0647704	0.161463	0.0505452	0.0386299	0
AGCAGCCAGATGAATA-1	0.220294	0	0	0.0397326	0.0133584	0.0159794	0.0229049	0.084727	0	0	0	0.0603579	0.00134943	0	0	0.0150883	0	0.00175073	0.0134345	0.113032	0.116601	0.0120078	0.0808428	0.0658593	0.0744515	0.0482275	0
AGCATATCAATATGCT-1	0.458483	0	1.77042e-08	0.00138361	0.019963	0	0.0314668	0	0.00048357	0.0141461	0	0.00965583	0	0	0	0.0356282	0	0.0173323	0.0174963	0.172826	0.175225	0	0	0.00129912	0	0.0446105	0
AGCATCATTTCGAAAG-1	0.144256	0	0.109963	0	0.00401622	0.0152758	0	0	0.00192634	0.0266894	0.0345865	0	0.203852	0.104622	0.0945579	3.41266e-08	0	0.0190166	0.0305028	0.115281	0.030758	0	0.00360331	0.0460474	6.59177e-07	0.0150444	0
AGCATCGTCGATAATT-1	0.267163	0	0.0724956	0.126286	0.0309935	0.15996	0	0.00602035	0	0.0382774	0	0	0.0215226	0	0.00414002	0.00436709	0	0	0.0434037	0.0468359	0.0979244	0	0	0.066338	0.0142718	0	0
AGCCAAGCTTTGTGTC-1	0.344122	0	0.0283255	0.0437641	0.0241004	0.00629315	0	0.040663	0	0.0182666	0	0	0	0.0258272	0.0260678	0	0	0.00392586	0.0172531	0.228392	0.0940166	0	0.015493	0.0457298	0.0239351	0.0138246	0
AGCCACTCCCGTGCTT-1	0.226317	0	0	0	0.00943079	0	0.0183555	0	0	0	0	0.00909095	0.0261103	0	0.0104556	0.0422363	0.000681081	0	0	0.0891248	0.415562	0.016201	0.0103773	0.0625481	0.0231155	0.0269551	0.0134386
AGCCATATAGTATGTG-1	0.330899	0.00238845	0.0183628	0	0.00200529	0	0.0255659	0	0.0191326	0.0406835	0.00466633	0.0473397	0.019771	0	0	0	0.000168064	0.0148294	0.0153102	0.192939	0.223091	0	5.276e-05	0.0408959	0.00142423	0.000475564	0
AGCCCATACATGTAAG-1	0.0944077	0	0.697515	0.0646431	0.00493867	0.01078	0	0	0	0	0	0	0	5.80301e-05	0	0	0	0.019224	0	0.0230097	0.0202738	0	9.31583e-05	0.0210916	0.00808921	0.0358762	0
AGCCCGGCATTAGAGG-1	0.182588	0	0.0119285	7.88199e-05	0	0.00541738	0	0	0	0	0	0	0.116596	0.0498161	0.0453845	0.0100488	0	0.00486428	0	0.28753	0.0660984	0.00129117	0.0494849	0.0519479	0.0291254	0.0735829	0.0142169
AGCCCTAAGCGAAGTT-1	0.233128	0.00240287	0.0915997	0.0746907	0.00621466	0.122053	0.0112325	0.00740812	0	0	0	0	0.00393312	0	0	0.0036487	0.0021394	0.0499265	0	0.218663	0.039661	0.003916	0.0260853	0.0627494	0	0.0405479	0
AGCCCTCCCTGGTGGC-1	0.104465	0.0317506	0.0477133	0	0.00347604	4.76811e-05	0	4.09321e-06	0.0380702	9.46697e-06	0.0637251	0	0.330764	0.122471	0.0364056	0.0100639	0	0.00206377	0.0225391	0.0379061	0.0699833	0.00748607	0.0404414	0.022072	0.00498704	0.00355493	0
AGCCCTTCTAATCCGA-1	0.266398	0.00287836	0	0.00612126	0.0171842	0	0.0242467	0	0	0	0	0.00369831	0.0285906	0	0.000144309	0.016688	0	0.0158976	0.00467127	0.0711583	0.0418766	0.0156141	0.0899853	0.261682	0.0572272	0.0522621	0.0236751
AGCCGTGGCTAAATGT-1	0.295567	0	0.295166	0.0304334	0.0202549	0.00477473	4.16755e-06	1.38203e-06	0	7.10326e-07	0.000210257	0	0.0121399	0.021137	9.54295e-07	0	0.0378452	0.0921555	0.0705955	0.0465635	8.32465e-07	0	0.000320534	0.0586417	0	0.0141869	0
AGCCTAATACCCACGT-1	0.180531	4.59558e-07	0.0151672	0	0.0180516	0.00498411	0.098975	0.00457924	0.0773349	0.0120656	0.102629	0	0.101951	0.0498155	2.88275e-06	0	0	0	0.0229746	0.0581008	0.0846371	0.0107546	0.0593461	0.0394087	0.0239297	0.0347602	0
AGCCTTAAAGCGGAAG-1	0.174163	0	0	0.00482524	0.019289	0.283284	0.262413	0	0	0.0228493	0.0338357	0	0	0	0.000228506	0.00802997	0.00393306	0.0149283	0.024391	0.0339899	0.048172	0	0	0.0225519	0.00310626	0.0373474	0.00266236
AGCGACAGGAACGGTC-1	0.219446	0	0.0331555	0.497767	0.0159247	0.00527821	0	0	2.81256e-06	0	0.00644752	0.00542859	0.0111928	0.0302886	0	0	0.0152288	0.0140609	0.0225911	0.0304548	0.0189442	0	0	0.00815701	0.0324186	0.0332125	0
AGCGACATCCCATTCA-1	0.280435	0	0.0620431	0.0535914	0.038197	0.11605	0	0	0	0	0	0	0.00459917	0	0	0	0	0.0646005	0.0433481	0.185053	0.0462388	0.000573225	0.0189147	0.051473	0	0.0348832	0
AGCGACCAACGATATT-1	0.402692	0	0.00613605	0.000463643	0.0520009	0.0202118	0.0170852	0	0	0.000413293	0.0106573	0	0	0	0.0148788	0.0152178	0.00723504	0	0.0684074	0.219891	0.0900681	0	0.000175611	0.0498927	0.0240175	0.000556111	0
AGCGAGACGTGAAGGC-1	0.119992	0.00306375	0	0.00545857	0.0124919	0.0193289	0.0442481	0.00710108	0.0971904	0.0626956	0.0355078	0.00931916	0.0708143	0.08395	0.0312099	0	0.00362864	0	0.00725388	0.0623486	0.134701	0.00376159	0.0685271	0.049224	0.0233818	0.0307021	0.0141
AGCGCATAATGAATCG-1	0.340663	0	2.84271e-06	0.0414716	0.00930999	0.0155613	0.0295539	0.0452202	0.0274927	0	0	0.0312818	0	0.00607089	0	0	0	0.0167861	0	0.091675	0.0806988	0.0179946	0.103178	0.0511805	0.0428438	0.0394617	0.0095531
AGCGCGGGTGCCAATG-1	0.340516	0	0.025564	0	0.0222759	0	0.0103853	0	0	0	0	0	0	0	0.0168867	0	0	0	0.00554302	0.239352	0.124127	0	0.043327	0.11483	0.0161276	0.0244415	0.0166244
AGCGCTTATGGGCAAG-1	0.220363	0	0.0828646	0.0334653	0.00934825	0.0149393	0	0	0	0.0452027	0	0.00452992	0.0272557	0	0.0138151	0	0	0.00675539	0	0.0503539	0.043449	0.0027524	0.0633813	0.275255	0.0437677	0.0395535	0.0229479
AGCGGACACTTCGTAG-1	0.320224	0	0.0108651	0.0261744	0.0214859	2.38095e-05	0.0298356	0.00502311	0	0	0	0	0	0	0.00984349	4.92876e-05	0	0.00402617	0.0137622	0.25365	0.086066	3.76156e-06	0.0349845	0.0947485	0.0739157	4.14243e-06	0.0153145
AGCGGCGGTTAGCGGT-1	0.203823	0	0.0131575	0.0093677	0.0116271	0.0257969	0.16372	0.0350844	0.0760617	0.0322986	0.0698695	0.0167301	0.026673	0.00291453	0	2.24871e-06	0	0.0068312	0	0.0383069	0.125312	0	0.0593433	0.0287501	0.00129534	0.0530348	2.79378e-07
AGCGGGAAGGGTCCAT-1	0.132156	0	0.0229277	0.00689401	0.00499643	0.00139627	0	0	0.0109731	0.0159685	0.0470183	0	0.0854062	0.109446	0.241738	0	0	0	0.027801	0.202957	0.0152361	0.00479047	0	0.0493145	0.00287284	0.0181077	0
AGCGGGTCTGACACTC-1	0.302914	0	0	0.0129709	0.0113975	0.0207248	0	0.00117982	0	0	0	0.0312214	0.00919935	0.0110482	0.000100511	0.0317394	0	0.0122312	0.010754	0.163089	0.143799	0	0.0207853	0.14698	0.0432642	0.0157782	0.0108229
AGCGGTTGAGATGTAC-1	0.21593	0.00254233	0.155198	0.0281663	0.0361029	0.0839615	0	0	0	0.00495095	0	0.00036726	0.0212584	0.0160156	0.0200093	0.0294925	0	0.0185338	0.00804943	0.0251689	0.0689334	0.0214598	0.0152547	0.1871	0	0.041504	0
AGCGGTTGCCGCTCTG-1	0.338745	0	0.0106885	0	0.0105292	0	0.017668	0.0242098	0.00718352	3.71788e-06	0.00295751	0.00583557	0	0.000803128	0	0.0322065	0	0.0117851	0.0343038	0.0448574	0.0244937	0.00419966	0.0951722	0.277487	0.0282164	0.0286277	2.6199e-05
AGCGTACGAGAGCTAG-1	0.160494	0	0	0	0.0152693	0.00381662	0.0470897	0.0914565	0.207802	0.0615671	0.12289	1.38823e-05	0.00790156	0	0.0131586	0.0229147	0	0.0361066	0.00661533	0.0502091	0.061677	0.00826688	0.000336219	0.0356761	0	0.0403483	0.00639065
AGCGTAGCGCTAGACC-1	0.211394	0	1.91229e-06	2.34773e-06	0.00909929	0.00666892	0.095889	0.177673	0.193356	0.0549133	0.0817237	0.00597969	0	0	0	0.000803185	0	0.0104715	0.0155647	0.0386518	0.0524283	0.00639323	0.00543721	0.0165176	0	0.0153899	0.00164048
AGCGTCTGAACCCGCA-1	0.154231	0.0207258	0.0107177	0	0.00731146	0.00841022	0.0143851	0.00618949	0.00682781	0	0.128406	0	0.274854	0.0388021	0.0131501	0	0	0.0280095	0.0106532	0.113718	0.053373	0.00203273	0.0236425	0.0604097	0	0.0241511	0
AGCGTGGTATTCTACT-1	0.354407	0	0.00405682	0.00498759	0.00690019	0.0122462	0.0204799	4.27647e-05	0.00283393	0	0.016611	0	0	0.0107003	0	0	0.000138027	0.0198864	0.0309682	0.289243	0.181772	0	0	0.0150673	0.0296584	0	0
AGCGTTCCGATTTAAA-1	0.27003	0	0.152964	0.0752099	0.0171326	0.0765009	0.0160415	0.00663005	0	0.00978942	0	0.00537247	0.0237338	6.29613e-06	0.0193042	0.00133334	0.00935357	0.00755356	0	0.0170077	0.0931972	0.00546584	0	0.098397	0.0201238	0.0645422	0.0103098
AGCTAACAAGCAATGT-1	0.203696	0	0.011119	0.0595812	0.014923	0	0	0	0	0	0.0179077	0.0590536	0.0135367	0.0195155	0.0617116	0.0107815	0	0.0320474	0.0493086	0.280666	0.0381097	0	0.0308531	0	0.0802446	0.0169447	0
AGCTAGAAGCAGAAGT-1	0.262589	0	0.00861543	0	0.00902299	0	0.0109462	0.0302821	0	0.0104298	0	0	0	0.00677184	0.0217023	0.0424674	0	0.00961398	0	0.0698984	0.046216	0.0101743	0.0780513	0.267296	0.0344736	0.0388107	0.0426382
AGCTATTTAATCCAAC-1	0.187607	0	0.0604502	0.039582	0.0205389	0.00962784	0	0	0	0	0	0	0.00729325	0.0135922	0.0194022	0.00136832	0	0.0155568	0.00317319	0.430555	0.0182183	0	0	0.0931999	0.0233766	0.0564589	0
AGCTCCTTCGCACATC-1	0.384092	1.21704e-06	0	1.5609e-07	0.0212523	0	0.00919238	0	0.0027686	0.0321146	0.00406194	0.00204296	0	2.68243e-07	0.00690772	0.0277611	0	0.0667452	0.0310879	0.141142	0.184797	0.0048608	0.00547357	0.0461356	0.0014877	0.0280748	0
AGCTCTAGACGTTCCA-1	0.268004	0	0.0187068	0.0131436	0.024571	0.00552467	0.109844	2.28182e-05	0	0	0.0205589	0	0	0.00797053	0	0	0.0176746	0.0204695	0.0365647	0.119842	0.216087	0.00101405	0	0.0261986	0.0843119	0.00949053	0
AGCTCTTCCCAGTGCA-1	0.236399	0	0.0536531	0.0328541	0.011452	0.0207003	0	0.0221462	0	0.0622654	0	0.00188291	0.0419201	0.00974798	0	0.0399561	0.0144223	0	0.000834234	0.046057	0.0477122	0.0268233	0.0497647	0.209861	0.023106	0.0484416	0
AGCTCTTCGTAACCTT-1	0.29713	0	0.0205348	0.0271947	0.0156534	0	0	1.70062e-05	0.012926	0	0	0.041737	3.87662e-06	0	9.32232e-06	0.00757366	0	0	0.0140833	0.162884	0.045151	0.011106	0.0547113	0.220852	0.0271068	0.0298402	0.0114863
AGCTCTTTACTCAGTT-1	0.331612	0	0.0316089	2.59186e-06	0.015881	0.0144206	0.0852789	0.012183	0.00803236	0	0.00975736	8.41178e-07	0	0	0	0	0	0.013169	0	0.118224	0.198787	0	0.00223412	0.0220741	0.079389	0.0573457	0
AGCTGAAGTAAACCAA-1	0.18843	0	0.0401591	0.0416263	0.0179613	0.00573958	0	0.0254346	0.0101185	0.0114736	0	0.000629499	0.0162669	0.0186098	0.035211	0.0418033	0	0.0131413	0	0.0629131	0.118271	0.0113092	0.0526517	0.216617	0.0272579	0.0443747	0
AGCTGCATTTGAGGTG-1	0.231691	0	0.0881261	0.0777675	0.00933755	0.0685367	0	0	0	0.0150263	0	0	0.047809	0	0	0.00153172	0.000341685	0	0.0124066	0.061675	0.106435	0.000589189	0	0.189788	0.0175293	0.0423361	0.0290726
AGCTGCTGTGCCGAAT-1	0.230657	0.0269047	0.0583074	0.0489358	0.00907445	0.0950601	0	0	0	0.0433271	0	0.0168821	0.0342797	0	0	0	0.000985036	0.0126596	0	0.0286682	0.0721082	0.0337687	0.039567	0.150997	0.0318491	0.0659692	0
AGCTGTAACCTCAATC-1	0.256215	0.0213957	0.230688	0.10759	0.00527053	0.00565602	0.00228789	0.0050222	0	0.037724	0.00140545	0.000101609	0.0238426	0.00318717	0	0.0177702	0	0.0830042	0.0374828	0.0182032	0.0203405	0	0	1.24948e-06	0.11423	0.00858148	0
AGCTTATAGAGACCTG-1	0.227091	0	0.0247869	0.0159433	0.0201547	0.0755631	0	0	0	0	0.0179571	0.0130612	0	0	0	0.0123142	0	0.0169192	0.024522	0.454816	0.0183139	0	0	0.0416239	0.00112948	0.0358034	0
AGCTTCAATACTTTGA-1	0.352379	0.000193346	0.0742855	0.081558	0.0377697	0.0835256	0	0	1.59757e-05	7.70992e-06	0	0	0.0497273	0	0	0.00682963	0.00511664	0	0.00841273	0.0296262	0.0522455	0	0.0404553	0.125229	0.0121059	0.0404888	2.78593e-05
AGCTTGATCTTAACTT-1	0.253839	0	0.293065	0	0.00506103	0	0.022263	0	0.0311657	0	0.0301988	0	0.00434018	0	0	0	0	0.0172765	0.02883	0.175989	0.0297011	0	0.0318432	0.0464717	0.0100427	0.0199122	0
AGGAAGCTGTCCGCCG-1	0.278365	0	0.00894773	0.011737	0.00851199	0	0.023149	0	0	0	0	0	0	0	0.0218951	0	0	0.00226479	0	0.319942	0.0898495	0.0104879	0.0131871	0.14189	0.0255281	0.0220288	0.0222156
AGGACAGTCGAATCCC-1	0.256211	0.00547109	0	0	0.0100965	0	2.58469e-06	0.035941	0.0239526	0.00384018	0.00708471	0.0152224	0	0	0	0.0421447	3.95882e-06	0.0039673	0.0061999	0.0889584	0.300598	0	0.0273896	0.114866	0	0.0580503	0
AGGACATCGCACGTCG-1	0.230309	0	0.0270368	0.0104019	0.0146107	0.0652971	0	0	0.0191183	0	0	0.0110461	0.0183851	0	0.0365942	0.0106145	0	0.00310791	0.0215306	0.413072	0	0.00137704	0	0.0655645	0	0.0519342	0
AGGACGACCCATTAGA-1	0.286913	0	0.0379152	0	0.0168601	2.2318e-06	0.087366	0.0110149	3.19572e-07	0.0271409	0.0268112	0	0	0.00284705	3.11173e-06	0	0	0	0.0105871	0.0764045	0.211357	0	0	0	0.0994026	0.0710179	0.0343568
AGGACGCTCGATGTTG-1	0.230258	0.00113557	0	0.0408988	0.00467194	0.0167058	0.0189107	0	0	0.0044914	0	0	0.0160845	0.0137425	0	0.0562212	0	0.00519279	0	0.0254514	0.030788	0.042252	0.0585087	0.306812	0.0727418	0.055133	0
AGGAGGCCTTCGCGCG-1	0.223893	3.27628e-07	0	0.0011429	0.0111276	0	0	0	0	2.00888e-05	4.71234e-07	0.000294568	0	0	0	0	0	0.0167283	0.0573893	0.564324	0.0816491	0.0150224	5.0484e-07	0.0215454	0	0.00686268	0
AGGATAAAGTCGGGAT-1	0.290666	0.00315023	0.00770563	0.011173	0.0194882	0	0.0651583	0	0	0	0	0	0	0	0	0	0.020728	0.042827	0.0432215	0.147861	0.197666	0	2.61932e-07	0.0492723	0.0732378	0.0278455	0
AGGATATAGGGATTTA-1	0.407609	0	0	0.00501865	0.0240003	0	0.00258034	0	0	0	6.17899e-07	0.00363389	0	0.0114918	0	0.00396516	0	0.0455184	0.0476262	0.17698	0.184405	0	0.00752855	0.0667165	0.0129253	0	0
AGGATCACGCGATCTG-1	0.190653	0.0383569	0.0394724	3.12271e-07	0.0119533	0	0.0425895	0.00010246	0.0490952	0	0.113555	0.0227474	0.177767	0.106633	0.0180102	0.0110887	0.00273615	0.0280702	0	0.032035	0.0606609	0	0.00518985	0	0	0.0492839	0
AGGCAAAGAGGAATCA-1	0.101306	0	1.78809e-06	0.00351814	0.00477059	1.90232e-06	0	0	0.0136824	0	0.110764	0.0156615	0.349389	0.14159	0.00246212	0.00582266	0.010539	0.0289069	0.0344341	0.0962506	0.0274513	0.0215363	0	0.0169024	0	0.0150091	0
AGGCAGATGCGTAAAC-1	0.24101	0	0.0082033	0.0089694	0.02299	0	0.0032587	0.0113784	0	0.000375958	0	0.0137889	0	0	0.0408678	0.0071319	0	0.0229884	0.0234191	0.140897	0.255658	0.00257242	0.0217988	0.149855	0.0168198	0.00801751	0
AGGCATTGTCGTAGGG-1	0.318107	0	0.00398599	0.0289421	0.0134244	0	0.00523378	0	0	0	0	0	0	0	0	0	0	0	0.0677213	0.440906	0.0870708	0	0	0.0159364	0	0.0186727	0
AGGCCCAGTGACTGGT-1	0.202005	0	0.0306388	0.000320391	0.0161041	0.411192	2.6294e-06	0.0160792	0.0272784	0.00877632	0.0641989	0	0	0.0120404	0	0.00290074	0.0154432	0.00266913	0.0280954	0.0298445	0.038984	0.0152322	0	0.0398788	0.00178937	0.0262766	0.0102495
AGGCCCATTGTACAGG-1	0.24347	0	0.12228	0.0975814	0.0191044	0.186328	0.0136866	0.00804144	0	0.0113842	0.000961872	0	0.0107367	0	0	0.0173619	0	0	0	0.0636537	0.0673846	0.0169897	0.0116166	0.0485731	0	0.0608462	0
AGGCCCTAGAACGCCA-1	0.102031	0	0.635545	0.086768	0.00209874	0.00016878	0.0111087	0	0	0.00447557	0.00334768	0	0	0.00886259	0	0.0103094	0	0.0113023	0	0.0286603	0.0253991	0	2.99587e-06	0.0149726	0.00594677	0.0490003	0
AGGCGGTTTGTCCCGC-1	0.170472	0	0.0163532	0	0.00425147	0	0.00273409	8.6079e-07	0.0675039	0.11873	0.0623651	0.000437459	0.0959929	0.00409253	0	0.0207904	0	0.00693148	0	0.0533872	0.15013	0.0123149	0.142028	0.0314137	0	0.0390212	0.00104982
AGGCGTCTATGGACGG-1	0.294649	0	0	0.0133309	0.0125396	0	0.00487438	0	0.00641066	0	0	0.00822062	0.0137063	0	0.0193411	0.050396	0	0.000811611	0	0.077482	0.0618699	0.0304715	0.0552079	0.267376	0.0166794	0.0447076	0.0219252
AGGCTATGGTTAGCTT-1	0.231206	0	0	0	0.0260847	1.95083e-05	0	0	0	0.0259575	0.051044	0	0.191649	0.0594405	0.144709	0	0.00540026	0	0.0622946	0.142987	0.0411505	0	0	0.0156467	0.00241006	0	0
AGGCTTCCCGAAGAAG-1	0.190407	0.0124778	1.9746e-06	0.53649	0.0064864	0.0178956	0.00136928	0.0158584	0.00232375	0	0.00432721	0	0	0.0165423	0.0177057	0	0	0.0331789	0	0.0427691	0.0214957	0	0	0	0.0169487	0.0422177	0.0215049
AGGCTTGCTAGACACC-1	0.210142	0	0	0.000110533	0.0126257	0	0.342392	0.0796644	0.0699976	0	0.0569838	0	0	0	0	0	0	0	0.0277159	0.0660653	0.0716652	0	0.00824899	0.0276903	0	0.0266982	0
AGGGAAACGAGGTACT-1	0.168501	0	0.0291837	0.0148528	0.00495765	0	0	0	0	0.0173119	0	0	0	0.0131392	0	0	0.00486903	0.0169994	0.0325922	0.54472	0.0348876	0	0	0.0915332	0.000145166	0.026307	0
AGGGACAGCACGGCGG-1	0.18988	0	0.0386946	0.0238505	0.0229012	0.0252587	0	0	0	0	0.0229065	0	0.0249475	0.00728272	0.00422647	0	0	0.012254	0.00270875	0.51094	0.0190003	0	0.0220061	0.0460016	0	0.0271407	0
AGGGACCGGCTGCGTT-1	0.171838	0	0.0227645	0.0661161	0.00813381	0	0.00235801	0.0123286	0.00963729	0.00536432	0	0	0	0	0.0380943	0.0175245	0	0	0.00667836	0.105057	0.0899412	0.0261983	0.0891055	0.244958	0.0485121	0.0353904	0
AGGGACTCTACGCGAC-1	0.176563	0	0.038598	0.0420879	0.00602573	0	0.0665572	0.0794747	0.0215918	0	0	0.0293653	0	0	0	0	0	0.00274071	0.0173874	0.0882024	0.169733	0.00597937	0.0557785	0.069454	0.0779921	0.0524689	0
AGGGAGACATACTTCG-1	0.312477	0	0.00243537	0.0252988	0.0049079	0	0	0	0	0.0179693	0	0.0199791	0.0368838	0	0.0114063	0.00249192	0	0	0	0.0751365	0.0682547	0.00057696	0.0718763	0.208295	0.0408942	0.101117	0
AGGGCAGCGGCGTGGT-1	0.212631	0.00310998	0.127137	0.0770109	0.00667566	0.132863	0	0.0116382	0	0.0136437	0	0	0.0233024	0	0	0.0314251	0	0.00586059	0.0212325	0.0787358	0.0586707	0.0100038	0.0730658	0.0712916	0	0.0417028	0
AGGGCGAGCAGCTGAT-1	0.235896	0.0193415	0.20182	0	0.0155869	0.0125293	8.79905e-07	0	0.0135986	0	0.0425021	0	0.069882	0.00232782	0.0275625	0	0.00562237	0.0557937	0.0459123	0.217345	0.0219984	0.00471111	0.00282873	0.00474032	0	0	0
AGGGCGTGATCGGCTA-1	0.162281	0	0.117878	0.114238	0.00814596	0.202925	8.93193e-06	0.022505	0.000273829	0.0288463	0.0125312	0.00287943	0.00546634	0	0	0.0425494	0	0	0.0416671	0.0465384	0.061832	0.000237383	0.0139007	0.0660098	0.0142567	0.028109	0.00692052
AGGGCTGCAGTTACAG-1	0.275147	0	0.021973	0	0.0137892	0	0.0325919	0	0	0	0.0119633	0	0	0	0	0	0.0176038	0.105792	0.0241673	0.161627	0.237345	0	0	0.0154342	0.0735859	0	0.00898001
AGGGTCAGAGCACTCG-1	0.173781	0	0.0682113	0.046313	0.00502569	0.319625	6.46847e-05	0.00400773	0.0135821	0.0243356	2.21799e-05	0.040641	0	0.0750063	0.0196944	0	0	0.0016006	6.18177e-07	0.0194574	0.028929	0.0153598	0.020222	0.0151635	0.027741	0.0572146	0.0240012
AGGGTCAGTAACCCTA-1	0.310157	0	0	0.0160807	0.0257071	0	0	0	0	0.0251572	0	0	2.92798e-05	0	0.0370179	0.0377351	0	0.0119723	0.018179	0.0796527	0.0277973	0.00419306	0.0676955	0.273495	0.0324586	0.0322034	0.000469229
AGGGTCGATGCGAACT-1	0.237202	0	3.31296e-05	0.0525371	0.00925399	0.000834785	0.0180406	0.0153641	0.0295558	0.0199668	0	0	0	0.0239294	0.00537833	0	0	0.00759507	0.0311972	0.171481	0.0586511	0.02261	0.0417715	0.226683	0.018395	0.00952038	0
AGGGTGCCGTTCTTTA-1	0.205462	0.0037877	7.20493e-05	0.00967179	0.0166882	0	0	0	0.0151598	0	0.0330446	0.0156699	0.117051	0.0378691	0.0401301	0.019828	0	0.02661	0.0337212	0.0664377	0.113692	0.00115552	0.0813628	0.040185	0.122402	0	0
AGGGTGCTCTCGAGGG-1	0.257641	0.000836366	0	0	0.0213793	0	0.00851674	0	0.0152793	0.0258249	0	0	0	0.00674165	0	0	0	0.0199892	0.0422083	0.0939479	0.0869862	0.0120824	0.0700219	0.27101	0.0481451	0.0193893	0
AGGGTGGATAGTGCAT-1	0.168076	0	0	4.31604e-05	0.00845434	0.381153	0.106808	0	0.00792396	0	0.0422315	0	0	4.93749e-07	0	0.0469153	0	0	0.0378482	0.0154188	0.0882251	0.009099	0.00465325	0.0458542	0.0136178	0.023678	1.36472e-07
AGGGTTCCCTTTGGTT-1	0.280846	0	0.00244759	1.79791e-06	0.0101118	0	0.00611119	0	0	0.0340691	0	0.0013277	0	0	0	0.0234276	0	0.0066388	0.0323436	0.0619121	0.141511	0.0139325	0.0704245	0.240748	0.041272	0.0054207	0.027454
AGGGTTTAGTTCGGGA-1	0.233084	0	0.0276304	0.0151631	0.0157672	0	0.089117	0.00262061	0	0.0313003	0	0	0	0	0	0.0177897	0	0.0149262	0.0229425	0.102238	0.276939	0	0	0.0165667	0.0924416	0.0414746	0
AGGTAACCTCCTATTC-1	0.189464	0.0148179	0.105407	0.0917636	0.0199741	0.137017	0	0.00864132	0	0.0123213	0.00859058	0	0.0100626	0.0365781	0	0.0229504	0.0133236	0	0.0218702	0.201405	0.0361878	0.0135791	0	0.0350729	0	0.0209741	0
AGGTACGATATTGCCA-1	0.203714	0.00438441	0.160776	0.112898	0.0214746	0.119884	0	0	0	0.0181913	0	0	0	0	0	0	0.00740405	0.00653208	0	0.0473609	0.0587765	0	0.0845108	0.0891218	0.0227544	0.0422168	0
AGGTAGATCGAGATAT-1	0.200906	0	0.0152798	0.0277409	0.00826374	0	0	0	0	0.00537139	0.0257217	0.0159201	0.121665	0.0560405	0.0108369	0.021136	0.00111195	0.0171259	0.0340487	0.0746151	0.102239	0	0.0939027	0.0315917	0.110972	0.02551	0
AGGTAGGTACAAAGCT-1	0.167494	0.0155589	0.372319	0.0966417	0.00835538	1.66944e-05	0.00206957	0	0.0130257	0	0.0071033	0	0.038193	0.0141634	0	0.00418525	0.0179305	0	0	0.0524781	0.0571121	0.00656425	0.0127132	0.0607367	0	0.053339	0
AGGTATAATTGATAGT-1	0.161739	0	0.0245406	1.88169e-06	0.0241002	0.0148416	0.00180461	0.00532657	0	0.0235126	0	0	0	0.0161629	0	0.0118279	0	0.000858265	0.00912965	0.0991844	0.0566355	0.0398358	0.0759819	0.255821	0.08597	0.0772567	0.0154692
AGGTCAGGTGAGAGTG-1	0.213841	0	0.155738	1.27785e-05	0.0212547	0	0.0022572	1.98523e-05	1.17754e-05	0.000605805	0.0489887	0	0.0742562	0.0133371	0	0	0	0.0395319	0	0.29044	0.0205783	0	0.0261573	0.0240319	0.0113439	0.0575942	0
AGGTCGCCACTTCGGT-1	0.154489	0.00398442	0.00910773	0.0066602	0.0104106	0.0233376	0.0013929	0.0623759	0.246615	0.0897106	0.11611	0.0359729	0	5.00608e-07	0	0	0	0.0295727	0.0286818	0.0581908	0.0615868	0	0.0256355	0.0131786	0	0.0186345	0.00435188
AGGTCGCGGAGTTACT-1	0.285932	0.00869701	0.00789183	0.000144823	0.0200809	2.38886e-05	0.0123223	0.00807614	0.00190145	0.0228317	0.00988079	0.007211	1.38429e-05	0.0121866	0	0.0268872	0	0	0.0144691	0.111593	0.0987152	0.0104828	0.0443859	0.195678	0.0516338	0.0489612	0
AGGTGTATCGCCATGA-1	0.205465	0.00267685	0.0154384	0	0.0237062	0.0196279	0.0274918	0.00532573	0.0566545	0.0744488	0.20596	0.0040802	0.0667372	0.0140618	0	0	0	0.0289836	0.0271134	0.0746018	0.0622286	0	0.0278947	0.026801	0	0.0307024	0
AGGTTCTCCTTTCCGG-1	0.296073	0	0.00233175	3.75019e-06	0.0276092	0.319402	0.0158026	0.00422945	0.0180204	0.00403619	0.00718097	0.0125947	0	9.9031e-06	0.00573533	0.040034	0	0.007598	0.0295088	0.0379507	0.0214251	0.00398023	0.0496121	0.0380298	0.024634	0.00333204	0.0308662
AGGTTGAGGCACGCTT-1	0.198747	0	2.78899e-06	0.0145145	0.0100303	1.26212e-06	0.0155163	0.0191463	0.0186876	5.93511e-07	5.45319e-06	0.0357364	0	0	0.0134609	0.0231541	0.022341	0	0	0.158823	0.299863	0.0166313	0.0293757	0.0788405	0	0.0369177	0.00820537
AGGTTTCACACACCTT-1	0.220975	0	0.00750296	0	0.0136866	0	0.0895361	0	0	0.0171685	0	0	0	0	0.0161519	0	0	0.0583721	0.0364573	0.0996302	0.231739	0	0	0.0315005	0.122562	0.0276793	0.0270385
AGTAACGTTCATCCTG-1	0.282753	0	0.148936	0.0430514	0.0156659	0.0477174	0	0	0	0	0	0	0.00665878	0	0	0.00224703	0	0	0.00778314	0.0170329	0.110789	0	0.0562585	0.134396	0.0271776	0.0610667	0.0384668
AGTAATGTCTTGCCGC-1	0.272507	0.00457154	0.0764853	0.102908	0.0371307	0.135747	0.00270676	0.0128857	0	0.00791933	0	0	0.00990278	0	0	0.00740041	0	0.0081546	0.0346399	0.129171	0.0363081	0.0153109	0.0521874	0.0375137	1.40496e-07	0.01655	0
AGTACATCATTTATCA-1	0.289843	0.00679619	0	0.0193458	0.0165745	0	0.0191	0	0	0	0	0.00279339	0	0	0.0438257	0.0327289	0	0	0.0229175	0.12395	0.100574	0.00408759	0.0129654	0.204712	0.0425038	0.0303434	0.0269372
AGTACCTTCGAGTGCT-1	0.265247	0.0245897	0	0.0268441	0.0111289	0	0	0	0	0	0	0.0059301	0.00547959	0	0	0	0	0	0.0236131	0.16209	0.162919	0.0171918	0.0670746	0.210287	0.0176056	0	0
AGTACGGCCCGTATCG-1	0.228669	0.0041181	0	0.007845	0.00864092	0.226851	0.157988	0.00427093	0.0553973	0	0.072177	0.00193882	0	0	0	0	0	0	0.0137564	0.0379291	0.0973875	0.00472307	0.0485626	0.00379356	0	0.0259523	0
AGTACGGGCACCTGGC-1	0.246246	0	0.00703866	0	0.0121277	0.000240148	0.0313313	8.18779e-06	0	0	0	0	0.00115329	0	0.0271234	0.0148843	0	0.00163194	0	0.151839	0.318657	0.0122761	1.48368e-05	0.107086	0.0211532	0.0471894	0
AGTACGTGGCCTGTCT-1	0.303385	0	0.165691	0.0434595	0.0123907	0.0558188	0	0.000562989	0	0.0218474	0	0	0.0150276	0.00523534	0	0.0202496	0.012335	0.00675365	0	0.0350886	0.0738167	0.03174	0	0.1251	0.0151723	0.0513505	0.00497433
AGTACTCTTATGCCCA-1	0.473899	0.0055574	0	0.0138085	0.0248589	0	0.0109809	0	1.972e-07	1.18273e-07	0.0047468	1.44743e-07	1.8474e-07	0	0	9.58321e-09	4.85341e-07	0.0262037	0.0563131	0.100682	0.183362	0.00980791	0.00431493	0.0463603	0.0112098	0.0278937	0
AGTAGAAGGCGCCTCA-1	0.316237	0	0	0.0235286	0.0177525	0.0147984	0.0583116	0	0	0.0278135	0	0	0	0	0.0235059	0.00202972	0.0109748	0.0148178	0.0321371	0.197542	0.184284	0	5.74415e-08	0.0515433	0.0122833	0.00441367	0.00802628
AGTAGCGTGAACGAAC-1	0.248266	0	0.0922062	0.0645493	0.00872397	0.10461	0	0	0.0130691	0	0	0.00634202	0.0235408	0	0	0.00121744	0.00207081	0.0142772	0.0269666	0.148813	0.0358272	0	0.0559734	0.0861714	0.0259864	0.0413887	0
AGTAGCTAGACGCCGA-1	0.20209	0.00416416	0.141356	0.0705559	0.010749	0.0764928	0	0	0	0.0351842	0	0	0.0281991	0.00607044	0	0.00759926	0	0	0	0.0251116	0.0675218	0.00585818	0.0301381	0.19819	0.0282326	0.062487	0
AGTAGGAAGGAAGTTG-1	0.234842	0	6.48725e-07	0.00300303	0.0211857	0	0.0168179	0.00395793	0	0	0	0	0.00886273	0.0171789	0	0.00753035	0	0.00803716	0.036083	0.0397581	0.0497977	0.036138	0.110955	0.303248	0.0366547	0.0583334	0.00761513
AGTAGGTAACATACAT-1	0.240545	0.00834332	0.115347	0.0304052	0.0474477	0.173391	2.79955e-06	0	0	0.0212778	0	0	0	0	0	0	0.00427556	0.0174306	0.0184479	0.116234	0.0621055	0.00615131	0.00699025	0.0583481	0.00967927	0.0635777	0
AGTATAATACTAGGCA-1	0.220469	0	0	0	0.0277883	0.0276434	0	0	4.3662e-06	0	0.044297	0	0.0754486	9.32539e-05	0.0620298	0	0	5.31492e-07	0.0746768	0.419466	0.0106576	0	0	0.0374258	0	0	0
AGTATCCATAATAACG-1	0.181584	0.00544151	0.012896	4.8403e-07	0.00791652	0.0211156	0.14095	0.127631	0.162817	0.0190001	0.126021	0.000199547	0.000618549	0	0	0	0	0.0151952	0.0369399	0.0289207	0.0731938	0.00406906	0	0.0309157	0	0	0.00457438
AGTATGCTGGAGACCA-1	0.213023	0	0.0300708	0.0105564	0.0182292	0	0	0	0.0449648	0	0.00845246	0.0474774	0	0.0236219	0.00348501	0	0	0.091015	0.0623827	0.24147	0.0547962	0.00250852	0	0.0346437	0.0920027	0	0.0213002
AGTCAAATGATGTGAT-1	0.214117	0	0	0.0209371	0.00712194	0.13829	0.0585386	0.0258538	0.0705629	0	0.0419213	0.027494	0.0320986	0.0164755	0	0.0143003	0	0	0	0.0789485	0.061056	0	0.0294451	0.0542138	0.0375921	0.0599554	0.0110788
AGTCAACACCACCATC-1	0.256887	0	0.0519782	0.00917367	0.00847932	0.00949126	0.0799843	0.0276996	0.00854472	0.00300882	0	0.0300433	0.00348927	0	9.88081e-06	0.0334402	0	0	0.0162166	0.0797546	0.228935	0	0	0.0182923	0.0799186	0.0546531	0
AGTCAAGATGACACTT-1	0.339798	0	0	0	0.03504	0.0117744	0.0299218	0	0.00418247	0.000821401	0.00692619	0	0.00878227	0	0	0.0222166	0	0.0429459	0.0155467	0.162703	0.213822	0.00567526	0	0.0674338	0	0.0324105	0
AGTCACTCCGCCTCAT-1	0.230591	0.00990907	0.0157622	0	0.00609752	1.81758e-06	0	0	0.0410977	0.0141357	0.233809	0.00485692	0.0764068	0	0.0119369	0	0.018011	0.0118512	0.0332586	0.0913446	0.104505	0.0181987	0.0476805	0.0153436	0.00500466	0.00870886	0.00148821
AGTCAGCCACCGCCTG-1	0.186446	0	0	1.45655e-05	0.00831461	0.0202943	0	1.09295e-05	0.0783316	0.0507042	0.266533	0	0.0747216	0.017354	0	0.0141103	0	0.0196079	0.0444184	0.0391886	0.0680862	0.00856189	0.0384253	0.0561407	0	0.00873636	0
AGTCCAGCGGGTACGT-1	0.163969	0.00364455	0.00782686	0	0.0107919	0.360837	0.0501913	1.80689e-05	0.00360878	0.000609553	0.0988661	0	0	0	0	0.0560174	0.00396568	0.0233513	0.0100424	0.0200617	0.0655425	0	0.0128114	0.0343102	0.0341735	0.0356604	0.00370055
AGTCCATTGGCTGATG-1	0.235615	0	0	0.0278421	0.0098513	0.000580217	0.00378274	0.0107114	0.00748974	0.00176199	2.42974e-06	0	0	0.0117957	0.0144449	0.0153576	0.00543402	0.0246465	0.033137	0.223034	0.131742	0.0149693	0.00815056	0.133842	0.0434222	0.0264285	0.0159579
AGTCCCGCCTTTAATT-1	0.267267	0	0.0460672	0.00657023	0.00851618	0	0	0.00428488	0	0.0329528	0	0.00948171	0	0.0309904	0.00677744	0.00504968	0.00472867	0	0.0208734	0.0499251	0.0450453	0.0530667	0.0896341	0.276593	0.0328392	0.00933721	0
AGTCGACGGTCTCAAG-1	0.228394	0.00472277	0.0138215	0.0118328	0.0173043	0	0.00279996	0.0225244	0	0.0164691	0	0	0	0	0.0298877	0.00994438	0.0104886	0.050427	0.0548549	0.158291	0.141124	0.026263	0.0310476	0.132456	0.0118179	0.00422943	0.0212991
AGTCGGCTCAACTTTA-1	0.208185	0	0.41871	0.0451109	0.0260732	3.45289e-05	0	0	8.431e-06	3.13511e-06	0.00255998	0	0.0252972	0.0316746	0	0	0.0186003	0.0352122	9.38802e-07	0.0315998	0.0368884	0.0126269	0.00924798	0.0566108	0.00236162	0.0195169	0.0196778
AGTCGTCGACCACCAA-1	0.417762	0	0	0.0217846	0.00948677	0	0	0	0	0	0.00125516	0	0.00210435	0	0	0.0105143	0	0	0.0945495	0.254273	0.0931133	0.00409191	0	0.0801005	0.0109268	3.78096e-05	0
AGTCGTGGGCATTACG-1	0.278164	2.22106e-06	0.263716	0.151332	0.00956653	1.47223e-05	0	0	1.15518e-07	0.013231	0	0.0116837	7.46903e-06	0.00873064	0.00175674	9.74793e-06	2.80728e-06	0.00856638	0.0444589	0.0370657	0.0776271	0.000178536	2.45645e-06	2.67189e-06	0.0267618	0.0669122	0.000206742
AGTCTAAAGTATACTC-1	0.324055	0	6.97664e-07	0.0373747	0.00779421	0	0.0358118	0.0165287	0	0	0	0.0113004	0.0142301	0.0157581	0	0.0196931	0	0	0.0192063	0.0957366	0.0874676	0	0.0309837	0.22184	0.00670485	0.0555134	0
AGTCTCACAAGACTAC-1	0.254531	0.00112671	0.131353	0.12906	0.0163185	0	0	0	0.0105816	5.02194e-07	0.00543654	0	0	0.0456189	0	0.0280406	0.0149037	0.0959015	0.0303151	0.0460342	0.0916049	0.0306052	0.00903181	0.00266652	0.0389049	0.0179313	3.39111e-05
AGTCTGGACATCCTTG-1	0.219851	0	0	0	0.0107857	0.0102813	0.343698	0.110757	0.0501519	0	0.0584945	0	0	0	0.0105068	0	0	0.0041887	0.0126297	0.0337521	0.0677443	0	0.0152375	0.0231464	0	0.0287746	0
AGTCTTCTCCTCAAAT-1	0.173384	0	0.0141463	0	0.0168252	0	0	0	0	0	0	0	0.0287691	0	0.00022692	0.0160278	0.0153187	0.00696658	0.00452386	0.201216	0.375005	0.0190454	0.0188458	0.0848607	0	0.0248377	0
AGTGAACAAACTTCTC-1	0.395817	0	0.0158085	0.00135835	0.0298586	0	0	0.00634127	0	0.00911316	0	0	0	0	0	0.00859001	0.02851	0.0023858	0	0.337087	0.0651447	0.0122925	0	0.024017	0.0216193	0.0420564	0
AGTGACCTACTTTACG-1	0.241011	0.00963562	0.0815931	0.020467	0.0118351	0	0.0771879	0	0.0102728	0	0.0102185	0.00685855	0	0.00255894	0	0	0	0.028891	0.00866635	0.161106	0.221878	0.00935573	0	0	0.0700654	0.016898	0.0115017
AGTGACTGTGACACAA-1	0.128345	0.0199123	0.0174386	9.03814e-05	0.00898932	0	0	0	0.0193579	2.70004e-06	0.0203049	0	0.269721	0.0640337	0.189874	0	0	0.0128108	0.0256381	0.102462	0.04146	0	0.0324356	0.0108945	0.00753404	0.0286959	0
AGTGAGACTTCCAGTA-1	0.235881	0	0.00648315	0.00411035	0.00918285	0	0.00852757	0.0757433	0.00115316	0.0285523	0	0	0	1.22343e-07	0	2.24333e-06	0	0.00976513	0.0255416	0.10228	0.16533	0.0305505	0.0542654	0.136582	0.0549155	0.051133	0
AGTGAGCCTCGCCGCC-1	0.319207	0	0	0.0278278	0.0119532	0.00387285	0.012854	0	0.00441491	0	0	0	0	0	0.0308837	0.0222573	0.00136756	0	0.02666	0.178779	0.0901694	0.0105599	0.0137143	0.173884	0.0198185	0.0498849	0.00189137
AGTGAGGGTTTCTGAC-1	0.284597	0	0.154609	0.0802745	0.00206955	0.0381927	0	0	0	0.00737308	0	0.012771	0.0211417	0	0.00780882	0.0304395	0	0	0.00592009	0.0285991	0.0614761	0	0.020776	0.139514	0.015842	0.0740886	0.0145075
AGTGATATGAGTAGTT-1	0.26225	0	0.0350952	0.0342233	0.0084912	0	0.0438721	0	0	0.0372698	0.000449727	8.28518e-06	0	0.0380107	0	0	0.00724619	0.00730544	0	0.096625	0.257487	0	4.01609e-06	0	0.121302	0.0234017	0.0269584
AGTGATTCAAGCAGGA-1	0.19356	0	0.0119856	0.000616019	0.0172522	0.00534124	0.0119248	0.0381924	0.00895955	4.87273e-06	0	0.0150658	0	0.0339657	0	0.0203174	0	0.0314628	0.0197401	0.102509	0.130368	0	0.0987749	0.198607	0.0205738	0.040779	0
AGTGCACGCTTAAGAA-1	0.500407	0.00466813	0	0.00488222	0.00788468	0.0102614	0.00264939	0	0	0	0	0.0160036	0	0	0	0.012855	0	0.0175126	0.0311371	0.282316	0.0808593	0	0	0.01308	0	0.0154837	0
AGTGCGTAGCTCGTAA-1	0.241692	0	0.0723557	0.138927	0.0234733	0.00264504	0.0325701	0.0159977	0.00258715	0	9.18897e-05	0	0	0.00157274	0.0073967	0.00512025	0.0122074	0.0163303	0.0252807	0.234902	0.112379	0	0.01121	0.00303327	0	0.0402276	0
AGTGCTTGCACGAATA-1	0.279141	0.0013457	0	0.014924	0.0196216	0.00726061	0.00148608	0	0	0.0150359	0.0247284	0.0181583	0	0	0.0321545	0.00274517	0	0.031873	0.035093	0.142029	0.207209	0.0149945	0	0.0979004	0.0405689	0.0137313	0
AGTGGCGGCAATTTGA-1	0.330458	0	0	0.0433677	0.0118828	0	0.0204318	0	0	0.0284572	0	0	0	0	0.0212825	0	0	0.0027294	0.0208776	0.231146	0.110951	0	0.0067829	0.134883	0.000166328	0.0365819	0
AGTGGCTCCGTCGGCC-1	0.182624	0	0.0129397	0	0.0103593	0.0157089	0.101245	0.0579028	0.172229	0.0827351	0.0865222	0.00212539	0.0193658	0.0177125	0	0	0.010685	0.00478002	0.0302832	0.0553767	0.0596959	0	0.0263363	1.13485e-05	0.0303776	0.0209842	0
AGTGGTGTTACCCGTG-1	0.19003	0	0	0	0.00513624	0.13147	0.273653	0.0797225	0.0450188	0	0.0448903	0	0	0.000416792	0	0	0.00754003	0.0106929	0	0.0460521	0.0693938	0	0.0290047	0.0204446	0	0.0465341	0
AGTGGTTGCGTATAGG-1	0.144637	0	0.018496	0.0292906	0.00418053	0.468603	0.048761	0.00567189	0.0182494	0.0125097	0.0643502	0.00310675	0	0.0107437	0.0087203	0	0	0.00447463	0.0152096	0.0174953	0.00914709	0.0060766	8.30965e-07	0.0613578	0.0153921	0.0335257	0
AGTGTATTGCGCATTG-1	0.257308	0	0.0171498	0.033184	0.0127503	0.00272299	0	0.0113953	0.0110777	0.0055905	0	0	0.0230107	0	0	0.0389323	0	0.00999594	0.0210886	0.0489796	0.0391244	0.0103583	0.0643588	0.315302	0.0130077	0.0308403	0.0338232
AGTGTGGTCTATTGTG-1	0.245343	0.00379437	0	0.00228814	0.00571193	0	0.0622786	0	0.0318684	0.155045	0.107111	0.02263	0.018652	0	0	0.0309529	0	0.0106022	0.0243831	0.0353797	0.133382	0	0.03507	0.0300533	0.00279274	0.0426615	0
AGTTAAACACTTGCGA-1	0.299675	0.0167799	0.0543901	0.00958008	0.0100839	0	0.0507481	0	0.0265235	0	0.0344327	0	0	0	0	0	0.0138605	0.0347784	0	0.0802347	0.198707	0	0.0248584	0.000166423	0.079122	0.0397032	0.0263557
AGTTAAGCGGTCCCGG-1	0.225335	0	0.0982283	0.0621353	0.00959483	0.035915	0.000382337	0	0	0.0824162	0	0	0	0.0139979	0	0.0320407	0	0.00227293	0	0.0219046	0.0504873	0.0295531	0.00819446	0.180092	0.0601547	0.0827593	0.00453576
AGTTAAGTCAACCGCT-1	0.173628	0	0.477514	0.0775881	0.0111572	0	0.0109311	0	0	0	0.0133371	0	0	0.00838892	0	0.000212248	0.0207854	0.00406924	0	0.0269851	0.0254036	0.0175237	3.82362e-08	0	0.0422751	0.0902009	0
AGTTACCCTTAAGACT-1	0.255873	0	0	0.0117169	0.0188476	0.342404	0.0193017	0.0117068	0.0166607	0	0.0452813	0	0.00454771	0	0	0.0324624	0	0.0138486	0.0480916	0.0457597	0.0344631	0.0185553	8.19587e-07	0.03128	0.0096609	0.036479	0.00305898
AGTTACCGCACATGGT-1	0.195103	0	0.00308439	0.0034671	0.0158693	0.258931	0.249464	8.77154e-06	0.0381923	6.69671e-07	0.0837882	0	9.08928e-07	5.1999e-07	0	0	0	0	0.0299842	0.0386417	0.069313	0	3.55003e-06	0.00930752	0	0.00483919	0
AGTTACTCTATCGTGG-1	0.200779	0	0.035785	0.0120595	0.0106807	3.72669e-08	0	0.00687952	0	0.04744	0	0	0	0	0	0.0152945	0	0.0345728	0.0738209	0.31223	0.0039702	0.0178834	0.0359908	0.157234	0.0216934	0.013686	0
AGTTATTGAAAGGTAA-1	0.238595	0	0.128907	0.103862	0.0144206	0.117151	0.0154303	0	0	0.000532537	0	0	0.0307488	0.0141209	0	0.00890741	0	0.000747516	0.00975708	0.0590647	0.0450162	0.0117691	0.0402323	0.101342	0.00304809	0.0563467	0
AGTTCCTACAGAATTA-1	0.261488	0	0.0156064	7.21306e-07	0.0277408	0.0162303	0.0241204	0.0308027	0.021804	0.00552033	0	0.0434508	0.000819404	0.00509598	0	0.0190826	0.0120726	0.00165806	0.0372056	0.174961	0.177291	0	0.00441398	0.0170575	0.0605752	0.0430031	0
AGTTCCTATTTATGTT-1	0.223983	0	0.018716	0.033781	0.00995227	0	0.0674913	0.0114592	0.0279928	3.47048e-06	1.07919e-06	0	0	0	0	0	0	0.0993855	0.0497868	0.0849865	0.196934	0	0	0.0296946	0.088065	0.040764	0.0170034
AGTTCTGCGTTGTATC-1	0.200258	0	0.0207781	0	0.00667031	0.15949	0.180624	0.0335921	0.0176336	0	0.137641	0	4.82472e-06	0	0	0.004783	0	0	0.0225538	0.0596093	0.0592333	0.000337129	0.0246582	0.0197028	0.0150147	0.0304154	0.0070008
AGTTGACATCGGCTGG-1	0.117684	0	0.0124855	0	0.0127633	0	0.014915	0	0.115698	0.0791593	0.216472	0.0157024	0.010067	0.000438332	0	0	0	0.118794	0.0598409	0.0672448	0.0532225	0.0105218	0.0526837	0.0192457	0	0.0230616	0
AGTTGACGGTCCTTGC-1	0.396518	0	0.0418804	0.0116329	0.0334131	0.0156271	0.0120599	0	0	0	0	0	0	0	0	0.0178731	0	0	0	0.203239	0.143696	0	0.00254967	0.0490019	0.0381072	0.0344021	0
AGTTGCTGACTGATAT-1	0.210732	0	0.00838224	0	0.014451	0.118798	0.266876	0	0.0318911	0	0.0661152	0	0	0	0	0	0.00958921	0.0124069	0.0419517	0.0394813	0.138329	0	0	0.0139226	0	0.0217299	0.00534334
AGTTTCGCAGGTCGGA-1	0.208291	0	0.0807606	0.0632196	0.016888	0.145001	0	0	0	0	0	0	0	0	0	0	0	0.0678893	0.0480021	0.263813	0.0257914	0.00753931	0.0147573	0.0345265	0.00768264	0.0158381	0
AGTTTGCACCTGCCTC-1	0.330972	0.0160047	0	0.0217977	0.0148547	0	0	0.00818493	0.0109091	0	0	0.023692	0	0.0227998	0	0.00585488	0.00373155	0.00269729	0.0211122	0.135205	0.128925	0.0132545	0.0355587	0.135472	0.0358398	0.0258647	0.00726973
AGTTTGGCACGGGTTG-1	0.341164	0	0	0	0.0244469	0	0.0276706	0.000328778	0	0	0.00493471	0	0	0	0	0.00108334	0	0	0.0400621	0.462054	0.0688374	0	2.38824e-07	0.0244565	0	0.00496144	0
AGTTTGGCCAGACCTA-1	0.339178	0	0.104714	0.171674	0.0149046	0	0.00707104	0.0021867	0	0	0.00474253	0	3.66685e-07	0.00475911	5.94336e-06	0.0625094	0.0191318	0.0134584	0.0204136	0.125314	0.0242873	0.0602913	0	0	0	0.0146289	0.0107285
ATAAACCATTGGACGG-1	0.225917	0	0.0198746	0.0192321	0.0158585	0.0467685	0.0114431	0	0	0	0.0209301	0.0275603	0.029708	0	0.0799685	0.00626921	0	0	0.0161801	0.409994	0.0241262	0	0	0.0283804	0	0.0177894	0
ATAAACGGACCCGTAA-1	0.241086	0	0.00922987	0.0215566	0.00899085	0	0.0626317	0	0.0267447	0.0161707	0	0.00490727	0	0	0	0.00204231	0	0.0377319	0.023541	0.122687	0.291919	0	0.00402423	0	0.101596	0.0113583	0.0137831
ATAAAGGCTCGGTCGT-1	0.222307	0	0.0327736	0	0.00721742	0.00321116	0.0275955	0.0572574	0.0148017	0.00289993	0.00424643	0.00725659	0	0.000940775	0	0	0	0.015806	0.0270702	0.151588	0.222613	0.00176817	0.0317211	0.0219713	0.109639	0.0373153	0
ATAAAGGTCAAGTACG-1	0.286445	0	0.167105	0.0785363	0.00343042	0.0464397	0	0	0	2.26797e-06	0	0.0074791	0.011705	0.00265146	0.0172958	0.00965532	0	0.00265305	0	0.0139636	0.0483632	0.00102121	0.00503866	0.181285	0.0302576	0.0866721	0
ATAAATATTAGCAGCT-1	0.178286	0	0.496852	0.0617305	0.00026398	0.00488788	1.21638e-06	0	3.2603e-06	0	1.52377e-05	0	0.00662168	6.02351e-07	0.00686718	0.00684906	0	0.00255898	0.0243035	0.0344328	0.087269	0.0026695	0.0165221	0.0406427	0	0.0292226	0
ATAACGCCGGAGGGTC-1	0.253865	0	0	0	0.0254144	0	0.0605456	0	0	0	0	0	0	0	0.0127446	0	0	0.045493	0.0503805	0.233455	0.163739	0.00971323	0.000695082	0.0459045	0.0658353	0.0322141	0
ATAACGGAGTCCAACG-1	0.20784	0	0.00176372	0	0.0392514	0	0.0213639	0	0	0.026908	0	0	0.0140226	0	0.013051	0.0006367	0	0.00827414	0	0.14176	0.371194	0	0.00680459	0.113637	0	0.0196928	0.013801
ATAACGTTACCTCCAC-1	0.248901	0.0098589	0.00747856	0.035274	0.0155226	0	0	0.00997235	0	0	0	0	0	0	0.0150521	0.0119275	0	0	0	0.0893808	0.121804	0.0151172	0.109834	0.236811	1.17303e-06	0.0446931	0.0283717
ATAAGGTGGAGAACAT-1	0.242019	0	0.00202054	0.0330561	0.0106173	0	0.0221732	0.017812	0	0	0	0.019296	0.00465055	0	0	0.0156517	0	0.0082413	0.0136307	0.09828	0.087308	0.00193165	0.0792801	0.205282	0.0540288	0.0554522	0.029268
ATAAGTACCCGATTGT-1	0.249829	0.00111809	0	0.0148198	0.00983888	0	0	0	0	0.00149638	0	0.0126414	0	0	0.00370813	0.0113056	0	0	0.00587081	0.0752776	0.188079	0.0262131	0.0989574	0.23148	0.0129062	0.0392825	0.0171756
ATAAGTAGGATTCAGA-1	0.259985	0.00755883	2.60064e-06	0.0235607	0.0143004	8.76256e-07	0	0	0	0.00413336	0	0.0264796	0	0	0	0.0260134	0	0.03612	0.00114304	0.122738	0.11207	0.017532	0.0608696	0.195295	0.050648	0.0415503	0
ATAAGTAGGGCGACTC-1	0.229431	0	0	0.0189189	0.0197526	0.00385727	0	0	0	0.0171118	0	0.0227787	0	0	0.0459259	0.00247512	0	0.00822187	0.0190615	0.143471	0.0810502	0.0340703	0.0179081	0.221128	0.0558661	0.0567808	0.00219094
ATAAGTTACCGCGACG-1	0.297754	0	0.0421658	0.00836034	0.00613604	7.65643e-07	0.0664034	1.87868e-05	0.0115591	0.043712	0.00861532	0	0	0.0136934	0	0	0	0.00809467	0.03712	0.087224	0.200358	0.00510357	0	0.00151971	0.0909791	0.0166335	0.0545483
ATAATACCGTTAGCCG-1	0.216228	0	0	0	0.018237	0.264193	0.124445	0	0	0	0.0558713	2.61052e-05	0	0	0	0	0.0262805	0.0635846	0.0244318	0.0365205	0.107585	0	0.000172953	0.0222374	0	0.00644488	0.0337429
ATAATAGCTGTTGAAT-1	0.221722	0	0.00902729	0.0285289	0.0123963	0	0.0563982	0	0	0	0	0	0	0	0	0	0	0.0244052	0.0334919	0.261155	0.242543	0	0	0.0191427	0.063903	0.027287	0
ATAATAGTGTAGGGAC-1	0.178137	0.0318733	0	0	0.0196485	0.0286996	0.000791459	0	0.00586167	0	0.207129	0	0.232479	0	0	0.00166047	0	0.0589452	0.00992819	0.0804974	0.0657518	0.000280644	0.026581	0.0390661	0	0.0126692	0
ATAATTAGCTAAGTAG-1	0.285513	0	0.0084608	0.0138833	0.0117168	0.00674852	0.0290917	0.0183893	0.0161421	0.00394702	0	0	0	0.00849116	0.0379367	0	0	0	0.0152683	0.273901	0.0984408	0	0.00422213	0.0841435	0.0484753	0.035228	0
ATACAGGCCCTCCAAT-1	0.224324	0.00706789	0.00603714	0.0135956	0.0144581	0	0	0	0.0317645	0.00182033	0	0	0.00927144	0.0140374	0.0118584	0.0261942	0	0.000113865	0.0314492	0.0982147	0.160999	0.0055713	0.0803402	0.176566	0.0564929	0.0298239	0
ATACCACGGGCAACTT-1	0.259678	0	0.228223	0.0347686	0.000906838	0.0131699	0	0	0	0	0.00659866	0	0.0187562	0.0104962	0	0.0038248	0	0	0.0112836	0.119778	0.0432386	0.10964	0.0581073	0.0449661	0	0.0365655	0
ATACCAGCAAATTGCT-1	0.190286	0	0.12986	0.0976414	0.0127152	0.142181	0.00696573	0.00860149	4.10885e-06	0.0412441	0.00855103	0	0.00389035	7.70937e-07	8.42983e-07	4.69933e-07	0.0103673	0	0.0190558	0.0672198	0.0612822	0.0315238	0.0435675	0.0909486	0	0.0340931	0
ATACCAGGCTAATAGA-1	0.198961	0	0.137105	0.0854754	0.0128063	0.198375	0	0	0	0.02253	0	0	0.0220865	0	0	0.0107742	0	0	0.0313258	0.0754478	0.0699801	0.0129172	0.0154929	0.0636045	0	0.0431179	0
ATACCAGGTGAGCGAT-1	0.257592	0	0.0168269	0.0479931	0.0322476	0.0624412	0.0110272	0.0269119	0	0	0.0433799	0	0	0	0	0	0	0.0208379	0.0100541	0.358431	0.00533137	0	0	0.0473346	0	0.0404071	0.0191835
ATACCGTCATCCATAA-1	0.33254	0	0.00181977	0	0.0121183	0	0.0098999	0.0275222	0.00699463	0.013666	0	0	0	0	0.0222969	0.00709675	7.63975e-05	0	0.00837176	0.0585016	0.00909885	0.0220668	0.0631456	0.284294	0.0166388	0.0611175	0.0427342
ATACCTAACCAAGAAA-1	0.179791	0	0	0.0350041	0.0135392	0.00833693	0.018807	0.0601654	0	0.00384575	0	0.0324933	0	0	0	0.0358024	0	0.00667196	0.0208914	0.0798534	0.166443	0.0160993	0.0667821	0.170115	0.0762662	0.00909225	0
ATACGCCGATCTACCG-1	0.173796	0.00463969	0.0248174	0	0.0199907	3.05117e-05	0.0241024	3.18672e-05	0.139775	0.0361606	0.218856	9.27295e-06	0.0704159	0.00213312	0.00636631	0	0	0.0334034	0.0159452	0.0456891	0.087202	1.34564e-05	0.0442667	0.0205238	1.05206e-06	0.0165604	0.0152699
ATACGCCGGCGAAACC-1	0.34015	0	0.000249375	0.0192472	0.00865483	0.0149293	0.0270977	0	0	0.0214833	0	0.00477523	0	0.00153988	0	0	0	0.0278179	0.0408414	0.18942	0.184889	0.0107253	0.016472	0.0640539	0.0129769	0.014674	2.49901e-06
ATACGGAACGTCGTTT-1	0.237559	0.0115056	0.0708746	0.00411989	0.0517515	3.76004e-07	4.57909e-06	6.72767e-06	0	0	0.0400713	0	0.0830975	0.0287913	0	0	0.0314739	0.0278473	0.046277	0.247015	0.0543714	0.00545981	0.0245571	0	0.0150293	0.0201868	0
ATACGGGTTTCGATTG-1	0.274528	0	0	0.0116347	0.00814811	0	0.0125565	0	0	0.00308811	0	0.00127089	0.000994528	0.00776583	0.0111589	0.0342369	0	0	0.0141364	0.175079	0.248041	0.0232059	0.000141152	0.111688	0.020795	0.0415298	0
ATACGGTGAAGATGCA-1	0.183632	0	0.00159324	0.00175453	0.00285847	0.239851	0.119386	0	0.0368816	0	0.0800339	0	0.0197892	0	0	0	0	0.00482962	0.027026	0.01475	0.179217	0	0.0446124	0.0226949	0.0123116	0.00433037	0.00444818
ATACGTACTTAGCCAC-1	0.296714	0.00899463	0	0.0024466	0.0139351	0	0	0	0.0112428	0.0294635	0	0.0215008	0	0	0	0.0399449	0	0.00906087	0.0240882	0.137185	0.199863	0	0.00947401	0.155613	0.0292175	0.00232562	0.00892948
ATACGTCCACTCCTGT-1	0.33025	0	0	0	0.0348247	0	0.0156932	0	0.0319195	0.0287701	0	0.0244334	0	0	0	0.018727	0	0.0101063	0.0401313	0.188059	0.20473	0.0102329	0.00956679	0	0.0054894	0.0249417	0.0221248
ATACGTTATGCACGGA-1	0.296549	0	0.00836511	3.41357e-05	0.013338	0	0.0462574	0.0348296	0.00344505	0	0	0.033991	0	0	0	0	0	0.00303919	0.0287968	0.322266	0.0796142	0.00362372	0.0296214	0.0659149	0.0296052	0.000708719	0
ATACTAGCATGACCCT-1	0.1842	0	0.0356614	0.0920498	0.0204093	0.0870707	0	0	0	0.0112888	0	0	0.00133149	0	0.0251897	0.0269704	0	0	0.0366319	0.269501	0.0675272	0	0.00960275	0.0890059	0.0153216	0.0282383	0
ATACTCTCGCCACTCT-1	0.15741	0	0.00281992	3.21355e-05	0.00985731	0.0224345	0	0.0127611	0.161691	0.125157	0.178256	0	0	0	0	0	0	0.0256184	0.0397247	0.0494347	0.0451619	0	0.0830578	0.0367408	0	0.0367437	0.0130984
ATACTGCCTTACACCG-1	0.450187	0	0	0	0.0177282	0.00872549	0.0129563	0.00178171	0.00660252	1.33725e-06	3.15328e-07	0.0101751	0	0	0.00923652	0	0	0.0512168	0.0145229	0.103974	0.206189	0	1.07091e-05	0.0562922	0	0.0236393	0.0267606
ATACTTGTTCTCGAGC-1	0.139368	0	0	0.0374209	0.00482849	0.397456	0.0426918	0	0	0	0.0420117	0	0	0	0	0	0	0	0.0186046	0.0255046	0.016848	0.17943	0.00298788	0.0621211	0.0071062	0.0153447	0.00827507
ATAGACAACGGGACCT-1	0.230775	0	0	0	0.00591031	0.0074063	8.83701e-06	0.0346847	0.0208911	7.45657e-06	0	0	0	0.00896833	0	0.0304065	0.00474687	0.0118528	0.0230903	0.157985	0.142052	0.0164675	0.0644083	0.18996	0.0362476	0.0141309	0
ATAGACGAAGAGAAAG-1	0.313478	0.00427638	0.0144098	0.0170703	0.0224634	0.0122434	0.0279247	0.0665233	0	0	1.78588e-07	0.00686829	0	0.0184219	0.0117793	0	0.00775982	0.00848109	0.0101816	0.201294	0.144849	0.00301544	0.0119623	0	0.017192	0.0517786	0.028027
ATAGAGTACTGGGACA-1	0.225081	0	0.0099131	0.00806615	0.0249508	0.00112707	0	0	0	0	0	0.014984	0	0.0164372	0.00241426	0	0	0	0.11144	0.550199	0.0173997	0	0	0.0179876	0	0	0
ATAGAGTTATCAACTT-1	0.227333	0	0.0391318	0	0.0158079	0	0	0	0.000182467	0.000134042	0	0	0.00598962	0	0.0314526	0.00210259	0.00535426	0	0.0149399	0.223074	0.149833	0	2.37345e-05	0.165908	0.0357065	0.0544523	0.0285745
ATAGATTTGCAGTCGG-1	0.246922	0	0.132355	0.0670413	0.00726765	0.148807	0	0.00574095	0.00503409	6.61055e-06	0.00070116	0.00113562	0.0108292	0.0412539	6.39659e-09	0.00344964	0.0177038	0.0264334	0	0.130407	0.0453382	0.00186107	0.00133033	0.0670635	0	0.0393202	0
ATAGCCTCAGTACCCA-1	0.205796	0.00730387	4.15365e-07	0.0180053	0.00429237	0.373642	0.11988	0	0	0	0.037219	0	0	0	0.0125494	0.00188238	0	0	0.0501239	0.0256643	0.0425784	0.0454185	0	0.0315315	0.00919552	0	0.0149166
ATAGCTGCTCTTGTTA-1	0.324793	0	0	0	0.0325532	0.261253	0.0670252	0	0.017397	0	0.00551945	0.0297183	0.0133962	0	7.1762e-05	0.00479608	0.0387561	0.00791733	0.0244144	0.0331814	0.0508654	0.00418839	0	0.0380044	0.00866418	0.0374856	0
ATAGGAATCTAAGCTT-1	0.177945	0.00651922	0.0831455	0.0945156	0.0114296	0.0810025	0	0	0	0.00868645	0	0	0.0300945	0.000404416	0	0.026922	0	0.0200671	0	0.0518277	0.0543613	0.0152026	0.035317	0.212259	0.0340043	0.0562963	0
ATAGGCGGCTATAGAA-1	0.301914	0.00815125	0.154332	0.179471	0.0246158	2.95832e-06	0.0316697	0.000962089	2.58708e-06	0	0.0331733	0	4.00586e-06	0.0198144	0	0	0	0.0338892	0.0217279	0.0708445	0.0698042	0	0	0.00865757	0.0178066	0.0231571	0
ATAGGCTAGCTTCGCA-1	0.34455	0	0.0171417	0.0168111	0.0202362	0	0.018168	0	0	0	0	0.0386732	0	0	0.0228522	0.0101359	0	0	0.0180325	0.15912	0.0939081	0.0062283	2.93527e-06	0.181093	0.0382428	0.0148034	0
ATAGGGATATCCTTGA-1	0.184944	0	0.0101798	0.00680846	0.0260398	0.00707885	0.00365409	0.0132403	0.00281452	0.000135687	0.00125318	0.00181377	0	0.00262187	0.0174004	0.0285568	0	0.00716666	0.0259689	0.382983	0.196127	0	0.0100727	0.0711398	0	0	0
ATAGGTTGGGCAGATG-1	0.215531	0	0.024864	0.00053505	0.0138167	0	0.0689348	1.9437e-05	0.0322166	0.00733793	0	0.00469003	0	0	0.0429354	0	0.00384699	0.0218687	0	0.158373	0.247007	0.00929797	0.00240016	0.00859144	0.0668234	0.0709095	0
ATAGTCTTTGACGTGC-1	0.166139	0	0.13238	0.0750153	0.0254141	0.129402	0	6.02689e-06	0	0.0212592	4.53708e-05	0	0.00231332	0.00876169	0.0287042	0.0108534	0	0	0.0196588	0.119292	0.0612707	0	0.0382268	0.0939577	0.0129233	0.0543763	0
ATAGTGAAGCGTTCTC-1	0.285559	0	0.012062	0.0198867	0.00389547	0	0.0638364	0	0	0.00394117	9.6051e-07	0	0	0	0	0.0104648	0	0.0150015	0.00278881	0.0702445	0.310256	0	0	0.0102245	0.110579	0.0294398	0.0518197
ATAGTTCCACCCACTC-1	0.245282	0	0.0171365	0.00608645	0.00758013	0	0	0	0.0380157	0.00566008	0	0.0252082	0	0	0.0148459	0	0.0157425	0.00801951	0.0333186	0.125446	0.0727094	0.00305832	0.0511904	0.25003	0.0501139	0.0305565	0
ATATAAAGCGCTCGTG-1	0.254353	0.00433096	0.0182889	0.00506448	0.0195729	0.00695709	0	0.00801694	0.0280373	0.0132451	0.00444727	0	0	0.0165805	0	0	0	0.00948053	0.0155185	0.105661	0.105519	0.0176548	0.0812418	0.183398	0.0627475	0.0200526	0.0198313
ATATAAATGTAGCTGC-1	0.214475	0	0.00595927	0.0176515	0.0101535	0	0	0	0	0.00740976	0	0.0163768	0.0145254	0	0	0.00815698	0	0.00924496	0.017598	0.122419	0.150245	0	0.0916159	0.210795	0.0690731	0.0343009	0
ATATAGAGTATTGGTC-1	0.164767	0	0.00754166	0	0.0167322	0.428416	0.128258	0.000323502	0.0200534	0	0.0247853	5.03865e-06	0	0.0246654	0.0171577	0.000773355	0	0.0099403	0.0339761	0.0186127	0.0427727	0	3.48077e-06	0.0111997	0	0.03679	0.0132272
ATATCAACCTACAGAG-1	0.231513	0	0	0.0211523	0.0138691	0	0	0.00512965	0.00822375	0.00994647	0	1.66459e-06	0.00633326	0.0199479	0.00394386	0	0	0.0112895	0.0203301	0.15655	0.10538	0.0586526	0.0489111	0.185385	0.0632372	0.0302036	0
ATATCAATTCCAGCCT-1	0.164239	0.00617165	2.03165e-05	0.0425001	0.00624784	0.40094	0.109623	9.69246e-06	0.0162495	1.5514e-06	0.0430722	3.86619e-07	0	0.0391494	0	3.43322e-06	0.022618	0	0	0.0103486	0.021884	1.63184e-06	0.018594	0.027805	0.0148803	0.0367331	0.0189078
ATATCGGTAGGGAGAT-1	0.236384	0.00825843	0.0474195	0	0.0149161	0.00531462	0	0.016674	0	0.00358513	0	0.00963427	0	0.0090232	0.0325697	0	0	0.00755941	0.00382488	0.127743	0.0931247	0.00505732	0.0488334	0.240422	0.0437773	0.0458786	0
ATATCGTGCCAGACCC-1	0.261457	0	0.0655435	0.121591	0.00737418	0.085818	0	0	0	0.0183056	0	0.00789829	0.0331895	0	6.92025e-05	0	0.00484833	1.11778e-06	0.016362	0.0214821	0.0543889	2.29645e-07	0.0430126	0.155488	0.0101627	0.0553282	0.0376804
ATATCTCCCTCGTTAA-1	0.260984	0	0.0150068	0	0.0341983	0.0255353	0	0.00355415	0	0.02243	0	0	0.0604977	0.00445242	0	0.0446688	0.0216055	0	0.0166882	0.0408638	0.0389085	0.0406381	0.0507124	0.221078	0.0363947	0.0617835	0
ATATCTTAGGGCCTTC-1	0.222454	0	0.0166306	0.014854	0.0129365	0	0.0869196	0	0	0	0	0	0	0	0	0	0	0.0929279	0.046486	0.123147	0.256834	0	0	0.0133141	0.0937569	0	0.0197386
ATATGGGATAGCAACT-1	0.248997	0	0.00382836	0.0598848	0.0320604	1.67033e-05	0.0192837	0	0.0126378	0.0238423	0.00538269	0.0289103	0	0.011369	0.0241119	0.00520766	0	0.0362438	0	0.123488	0.178791	0.00822229	0	0.0678095	0.0483618	0.061551	0
ATATGTCTCCCTAGCC-1	0.220562	0	0.00947259	0.0165219	0.00234065	2.49867e-07	0.0149191	3.79397e-06	0.0276307	1.9679e-06	0	0.014835	0.0180344	0.0338373	0.0237089	0.0352459	0	0.0101446	0	0.118342	0.0413353	0	0.0512305	0.274978	0.0389288	0.0479267	0
ATATTCAGTTAAACCT-1	0.160363	0	0.232012	0.140067	0.00299774	0.00154783	0.0327365	0	0.00996917	0	0.0237775	0.0129085	0.0287369	0.0283845	0	0	0	0.00234412	0.0280279	0.0597779	0.114517	0.00558181	0.0399098	0.0528264	0	0.0235153	0
ATATTCCACATAGTGA-1	0.259328	0.00188496	0.0127389	0.0132248	0.0150682	0	0	0	0.00421313	0.013553	0	0.00326028	0.0087434	0	0	0.0144436	0	0.0119162	0.0121334	0.132973	0.214301	0	0.0155029	0.194349	0.0434322	0.0195352	0.00939904
ATATTCCCACAGGTCA-1	0.169464	0	0.102841	0.107078	0.00624061	0.193077	0.00437196	0.00135274	0	0.0124865	0.00011149	0	0	0	0	0.0291651	0.0091189	0	0	0.0682221	0.0477644	0.0158655	0.0563563	0.138777	0	0.0377069	0
ATATTGCTGTCAAAGT-1	0.143304	0	0	0.00942525	0.0130039	0.0231111	0	0	0	0	0.137083	0	0.285901	0.060906	0	0	0	0	0.0125487	0.145434	0.0579591	0.00503355	0.0268645	0.0403568	0.00184559	0.0282434	0.00898032
ATATTTAACCCTCAAG-1	0.257648	0	0.036507	0.019164	0.0143263	0	0.059181	0.0462124	0.00273164	0.00835437	0.00565211	0	0	0	0	0.00630959	0	0	0.0197852	0.122909	0.230217	0	0	0.00209185	0.116796	0.024193	0.027921
ATCAAACGAAGGTTTG-1	0.387663	0	0.0641816	0.271408	0.00439458	5.86696e-10	0	0	0	0	8.9454e-07	0	0	0.0151051	0	0	0	0	0.0554646	0.049959	0.0135478	0.0268466	0.0212157	0.0330554	0.0281379	0.0243564	0.00466406
ATCAAGATCCCAGGAC-1	0.294974	0.0165973	0	0.0640193	0.026279	7.00737e-06	0.0191045	0.00527726	0	0.00870604	0.00350816	0.00966989	0.0171057	0.00135806	0.0164056	0	0.00352657	0.00763092	0.0283694	0.151416	0.228228	0.00992108	0	0.0532352	0.0171402	0.0122019	0.00531824
ATCAATCTGGGCTGCA-1	0.276762	0.00110992	0.0308139	0	0.0139378	0	0.06826	0	0.0140737	0.0119611	0.00103353	0	0	0	0	0.000482566	0.00793243	0.0594157	0.0182845	0.15786	0.222988	0	0	0.007874	0.0637433	0.043467	0
ATCAATGCCGTGGCTG-1	0.172277	0.00181785	0	0	0.00877508	0.00753335	0.024899	0	0.0665512	0.0224955	0.128632	0	0.196317	0.117551	0	0.00350458	0	0.0172906	0.044201	0.0501482	0.0626241	0.00664503	0.0347427	0.0188613	0.0086831	0.00461351	0.0018361
ATCACATTAGAATATC-1	0.251269	0	0.0352115	0.0494654	0.00552653	0	0	0	0	0.0173351	0	0.00332108	0.0240214	0.0154158	0	0.0168198	0.00555901	0.0131753	0.00860633	0.0921202	0.109792	0.0550851	0.0480836	0.185134	0.0165761	0.0474819	0
ATCACGTGCTAATTAA-1	0.165198	0.00633275	0.084686	0.455902	0.0052233	7.76021e-06	0.0119795	0.00210251	0	0	1.11326e-06	0.0156119	0.00638833	0.000738984	0	0	0.0245859	0.0576789	0.018893	0.0281361	0.0375033	0	0.0213844	0.0143929	0.0013573	0.0418955	0
ATCACTTCATCCTCGC-1	0.215213	0	0	0	0.0313198	0	0.0173374	0.00383913	0	0.0102842	0	0	0	0	0.00542638	0.0130946	0	0	0.00883785	0.456623	0.12946	0.0123296	0	0.059245	0.0115966	0.0253937	0
ATCAGACGGCACGCCG-1	0.256193	0	0.0853559	0.0624573	0.0267647	0.00396206	0.0531416	0.00239365	0.00540679	8.69209e-05	0.0214438	0	0.00256554	0.0370981	0	0	0	0.0127153	0.022072	0.15285	0.1575	0	0	0.0402433	0.0308347	0.0243861	0.00252921
ATCAGCCTCATGCTGC-1	0.494555	0.0103544	0	0	0.0166694	0	0.00454994	0	0.0126418	0.00790968	0	0.00144138	0	0	0	0.0160167	0	0.020293	0.0416458	0.087794	0.195616	0.0059771	0	0.0486283	0.00696038	0.0289467	0
ATCAGCTCGTCCACTA-1	0.21027	0	0.045338	0	0.0211766	0.00567596	0.0706687	0	0.0675678	0	0.116436	0	0.159203	0.0862736	0	1.09202e-06	0	0.0194816	0.0426934	0.0267314	0.03793	0	0.0170223	0.0412305	0	0.0323005	0
ATCAGGTCGCCATTGC-1	0.219054	0	0.111647	0.0811519	0.0092039	0.0317012	0	0	0	0.049276	0	0	0.00855278	0.0185757	0	0.0108069	0	0	0	0.0305959	0.0526559	0.00947946	0.0373847	0.250172	0.0294628	0.0492485	0.0010318
ATCAGTAGGCAGGGAT-1	0.236998	0.00338958	0.00807833	0.0282909	0.0231008	0	0	0	0	0	0	0	0.00468565	0	0.01713	0.0431684	0	0.00394855	0	0.234759	0.194368	0.0250435	0	0.124374	0.0299147	0.0227505	0
ATCATCCAATATTTGT-1	0.2833	0	0.0229635	0.0173664	0.0193751	0	0.06461	0.00934756	0.00697246	0.0134954	0	0	0	0	0	0	0	0.0279531	0.0141814	0.0416538	0.288843	0	0	0.0485283	0.121536	0.0198742	0
ATCATCTGCCCAGTGT-1	0.27816	0.00664582	0.156536	0.0971206	0.00873102	0.0825629	0	0	0	0.0219402	0	0	0.0351179	0	0	0.00361777	0	0.00187348	0.0183927	0.0128057	0.088236	0	6.35788e-07	0.12659	0	0.0603293	0.00133966
ATCCAACGCAGTCATA-1	0.362288	0	0	0	0.0394763	0	0	0.0212737	0	0	0	0	0	0	0.0248244	0	0	0	0.0860266	0.336587	0.00120293	0	0.0195124	0.0391726	0.0129798	0.0363107	0.0203459
ATCCAATGGAGGGTCC-1	0.187023	0	0.557485	0.0339756	0.00992582	0	1.92683e-05	0.0182417	0.00514957	0	0.00430762	0	0	0	0	0	0.010171	0.00642284	0	0.019137	0.0456928	0	0.0153948	0.0198588	3.85421e-05	0.06575	0.00140628
ATCCAATGGTACCGAA-1	0.224066	0	0.00545072	0.0390972	0.010993	0.390306	0.000268223	7.96949e-07	0	0	0.0654652	0	0.0107292	0.0313641	0	0.000648091	0	0.00932446	0.0263187	0.0164991	0.0285671	0.00797068	0.0269002	0.0477063	0	0.0291872	0.0291377
ATCCACATCGACAGAA-1	0.174266	0.00483926	0.00386595	0.00421334	0.00404956	0	0.0147571	0.0435175	0.0443876	0.0282088	0	0	0	0	0	0	0	0	0.00322248	0.0476563	0.206151	0.0117397	0.062685	0.182917	0.125663	0.0378603	0
ATCCACGCTAAATGTT-1	0.306131	0.00606722	0.140646	0.081776	0.00950019	0.0566368	0	0	0	0.0185015	0	0	0.0122633	0	1.61643e-07	0	0	0	0.00673383	0.0209403	0.05793	0.0149621	0.022797	0.141839	0.0356829	0.0675925	0
ATCCACTTTCAGACTA-1	0.210534	0	0	4.72275e-07	0.0241289	0	0	3.95882e-06	0	0.00414336	0	1.47994e-06	0	0	3.88941e-06	0.0333761	0	0	0.110809	0.0792506	0.136342	0.0243767	0.0841951	0.207886	0.0366518	0.0482962	0
ATCCAGAGCAACAACC-1	0.247195	0	0.00678893	0.0419593	0.0316399	0	0.0725657	0.0221255	0.00958233	0	0	0.0172611	0	0	0	0.00740012	0	0.0127407	0.0542084	0.183279	0.164337	0.000679233	0.000136118	0.0225192	0.084516	0.0210665	0
ATCCAGGATTCGTGAA-1	0.293442	0	0.0322908	0	0.0167537	0	0.087472	0.0385232	0.0118367	0.000519023	0.0137631	0.0283152	0	0	0	0	0	0.0338372	0	0.110551	0.203685	0	0	0.00575558	0.0679367	0.0465621	0.00875685
ATCCCATCCACAGCGC-1	0.202936	0	0	0	0.0147608	0.0798438	0.305224	0.0821108	0.055138	0.0180765	0.0111358	0.000209888	0.0127527	0	0.0103697	0.00334943	0.0126681	0.000374365	0.020171	0.0198563	0.0822538	0	0.0289443	0.0132212	0	0.0218678	0.00473633
ATCCCATTTCCGTGGG-1	0.23263	0	0.0158924	0.0567692	0.0271192	0.0159817	0.00380532	0	0.0213691	0.0210892	0.0107859	0.0114582	0	0.00435239	0.0343245	0	0	0.0083563	0	0.145248	0.230373	0.00277499	0	0.0881441	0.0469437	0.0225828	0
ATCCTACCTAAGCTCT-1	0.266162	0.0155294	0.0370557	0.0296192	0.0123032	0	2.13913e-05	0	0	0.0182172	0	0	0	0.0391337	0.00276424	0	0	0.0226824	0	0.15167	0.218152	0	0	0.0163032	0.106539	0.0416224	0.0222251
ATCCTGAATCGCTGCG-1	0.200466	0	0.359019	0.0255948	0.0116954	0	0.00481768	0	0	0	2.96751e-05	0	6.91348e-06	0	0.0143301	0.0173004	0.00484229	0.00701137	0.0423129	0.0927596	0.0295145	0.00654723	0.107502	0.0606344	0.00606314	0.00955206	0
ATCCTGCGTGGAATGG-1	0.242329	0	0.0133983	0.0517975	0.0166038	0	0.03614	0	7.98331e-06	0.0227809	5.93159e-06	0	0	0.017516	0.0115522	0	0	0.04342	4.48695e-06	0.0621612	0.231921	0.0162843	0.00665471	0.0239538	0.126412	0.0370606	0.0399957
ATCCTGCTGCAGATAG-1	0.195497	0	0.0136188	0.0101961	0.0105274	0.054914	0.0066657	0	0	0	0.0245187	0	0.00640842	0	0	0	0	0.0108913	0.0443805	0.55772	0.0200428	0	0	0.0446194	0	0	0
ATCGACCCAATACAGA-1	0.218507	0	0.0163837	0	0.0115435	0	0.072085	0	0.00133589	0.00279214	0	0	0	0	0	0.0144562	0	0.084141	0.0448908	0.144391	0.199755	0	0	0.0224324	0.0897606	0.0426165	0.034909
ATCGACTCTTTCCGTT-1	0.190536	0	0.0169683	0	0.0233309	0.00451588	0	0	0	0	0	0	0	0	0.0176102	0.0213842	0.0172005	0	0.0398236	0.434908	0.131525	0.00579186	0	0.0765825	0.0083666	0.0114565	0
ATCGCACGATTGTTCA-1	0.167922	0	0	0.00389948	0.0045226	0.460446	0.0245715	0.00875311	0.00745623	0	0.073613	0	0	0	0	0.0212421	0	0.00988034	0.0228191	0.0212091	0.0334807	0.027076	0.0233205	0.0116231	0	0.0507719	0.0273929
ATCGCACGCCGGGAGA-1	0.248936	0.00490789	0.00693525	6.13344e-06	0.0323458	0	0.0163149	0	0	0.00616518	0	0	0	0	0.0211638	0.00577254	0	0.00615099	0.055968	0.40449	0.124289	0.00434086	0	0.0478074	0.0143865	1.92183e-05	0
ATCGCTGCGTGCAGCA-1	0.263037	0	0.0161599	0.0190926	0.0143271	0.00145219	0	0.0137846	0.00635468	0	0	0	0.00265743	0.00960016	0.0406529	0	0	0	0.0181013	0.153433	0.0718145	0.0252159	0.0557305	0.195778	0.0427364	0.0500712	0
ATCGGAGACAGACGGC-1	0.211815	0	0	0.0105247	0.0277851	0.000665313	0.0117669	0.0182011	0.0364734	0	0	0.0134822	0.00312421	0.000188751	0	0.0182672	0	0.00406802	0.0287068	0.12058	0.215022	0	0.0204562	0.226204	0.0326693	0	0
ATCGGCAAGCAGTCCA-1	0.286211	0	0.0446347	0.019045	0.0159265	0	0	0.0119031	0.000640772	0.0355566	0	0.00355455	0.00413252	0	0	0.0320064	0.0112577	0.00496604	0.00503335	0.0740079	0.061264	0.0301673	0.046443	0.247108	0.0345454	0.0315962	0
ATCGGTTACCTAGTAA-1	0.154919	0.0107759	0.0197386	0.026129	0.0457929	0.451897	0.0257466	0	0	0	0.0463393	0	0.0143808	0.014607	0	2.05394e-06	0.00335816	0.0100017	0.030951	0.0236289	0.0655645	0.00799069	0	0.0280208	0	0.0113275	0.00882877
ATCGTGGAAAGTCTGG-1	0.150395	0	0	0	0.00665714	0.0139728	0	0	0	0.00522974	0.0349123	0	0.360164	0.132353	0.0255878	0	0	0	0.0204737	0.0814512	0.0477981	0	0.042223	0.0302938	0.0087435	0.0397456	0
ATCGTTCACTTTCGCC-1	0.304237	0	0.0198405	1.32079e-05	0.0115326	0.00119093	0	0	0	0.0173227	0	0.0111143	0.0147326	0.0782718	0.028405	0.00596171	0	0.011728	0.0163244	0.0729043	0.0160592	0.0149624	0.0238073	0.208523	0.0405272	0.077798	0.0247431
ATCTAATATCCTACGG-1	0.278107	0	0.00143644	0.0225234	0.0185757	0	0.0160422	0.0184721	0	0	0	0.0316199	0	0	0	0	0	0.0434381	0.0325847	0.132805	0.127983	0	0.0722232	0.141641	0.0582946	0.00425373	0
ATCTAGCTTGTGAGGG-1	0.250942	0.0139795	0.0040249	0.0228151	0.0145539	0.0434104	0.0465993	0.00531399	0	0.0185719	0	0.0260257	0	0	0	0	0	0.0124597	0	0.234912	0.145861	0	0.0191125	0.102173	0	0.0392445	0
ATCTCATAAACCTACC-1	0.323154	0	0.0231637	0.0313832	0.0092417	0.0357353	0.0222137	0.0011591	0.0109034	0	0	0.0376442	0	0	0.0190891	0.00394927	0	0.0218928	0.0163401	0.122282	0.0495483	0.020574	0.0301667	0.158835	0.0180602	0.014833	0.0298312
ATCTCCCTGCAATCTA-1	0.205885	0	0.0884151	0.0868175	0.0227841	0.0414813	0	0.0131106	0	0.00769377	0	0.00983504	0.00468368	0	0.00543698	0	0	0.0192298	0.0161186	0.302386	0.0710844	0	0	0.0502184	0.0170224	0.0377976	0
ATCTGACATGGAAGGA-1	0.245741	0	0.0282713	0.0564014	0.00795856	0.104684	0.101645	0	0.00504544	0	0.0997482	0.0267661	0	0.0204811	1.50877e-06	0.0255953	0	0.0115849	0	0.0264801	0.137572	0	0.0219561	0.0165726	0.0428107	0.0206847	0
ATCTGATAGTGTCTTA-1	0.29298	0	0.0272236	0	0.022291	0.360362	0.0753285	5.17058e-07	1.44367e-06	3.64998e-06	4.48984e-07	0.00350451	0	0	0	0.00718487	0	0.00266112	0.0243102	0.0268127	0.0554307	0.0244174	0.0179247	0.00412274	0	0.0412235	0.0142168
ATCTGCACCTCTGCGA-1	0.346362	0	0	0	0.012721	0	0.0215415	0	0	0	0	0.0137839	0.0247801	0	0.0111767	0.0103745	0	0	0.0186246	0.172428	0.0916256	0.00057073	0.0197165	0.200125	0.0239947	0.0321752	0
ATCTGCTGTTATCGCC-1	0.316715	0	0.040601	0.0200149	0.0178997	0	0.0101574	0.0374665	0	0.0299722	0	0	0	4.91852e-06	0.0378203	1.39977e-06	0.0163672	0.0836256	0	0.131174	0.11117	0.0168757	0.0147988	0.0356126	0.0516816	1.09202e-06	0.0280397
ATCTGGGCTGTTCTTG-1	0.226786	0.00330509	4.88336e-05	0.00873305	0.00872651	0.014509	0.00505631	0.0235524	0.0369077	0.0110671	0.00415221	0	0.00892673	0.00417949	0	0.0141668	0	0.0576079	0.0134717	0.179875	0.0893218	0.0116111	0.0342858	0.136332	0.0692056	0.0381718	0
ATCTGGTTAAGACTGT-1	0.231176	0	0	0	0.00650671	0	0.0194746	0	0.010503	0	0	0.0212453	0.0125078	0	0	5.35788e-07	0	0	0.0135944	0.0643168	0.395746	0.00739435	0.0438535	0.106003	0.0223051	0.0180829	0.0272899
ATCTGTAATTGTACCC-1	0.184524	0.0108814	0.107945	0.0673455	0.0145876	0.201425	0.0114387	0.018163	0	0.00582977	0	0	0.000852205	0	0	0	0.00129842	0.0279982	0.0236306	0.131325	0.0320075	9.83447e-05	0.0622475	0.0546828	0.0151556	0.0285632	0
ATCTTAGGGCATTAAT-1	0.347143	0.0204192	0	0	0.0517949	0.26814	0.0427489	0.00282645	6.71655e-06	4.78535e-07	0.000666379	0.0117516	0.00104277	1.29351e-06	2.79711e-06	0.000387775	0.0217671	0	0.0123693	0.0283991	0.0214766	5.962e-06	0.0294517	0.0561314	0.00538142	0.0370004	0.0410849
ATCTTGACCTGCAACG-1	0.363496	0	0	0	0.0808702	0.0681653	0	0	0	0	0	0	0	0	0	0	0.0223279	0	0.158244	0.178429	0.018476	0	0	0.0471606	0.0144457	0.048385	0
ATCTTGACTTGTCCAA-1	0.230733	0	0	0	0.013388	0	0.0286808	0	0	8.85386e-07	0	0	0.0331445	0	0.0450063	0	0	0	0.0245484	0.203838	0.101764	0.0174271	0.0534301	0.19465	0.0224272	0.0309624	0
ATCTTTCGTATAACCA-1	0.303892	0	0.00478034	0	0.01249	6.4749e-06	0	0.0108566	0	0.0361534	0	0	0	0	0	3.13916e-07	0.0170489	0	0.0151177	0.203509	0.072771	0.00963697	0.0492707	0.155405	0.0409092	0.0681523	0
ATGAAGCCAAGGAGCC-1	0.240425	0	0.0999549	0.115592	0.0184011	0.199883	0	0	3.36923e-06	0.0348371	0	0	0.0108602	0	0	0.0149164	0	0	0.00796283	0.0603777	0.0609664	0.00842373	0	0.0649419	2.68199e-05	0.0624274	0
ATGACGCCGGCTCTAA-1	0.220171	0.0113771	0.0951922	0.0825144	0.0125954	0.174787	0	0.00689203	0	0.00224542	0	0	0	0	0.00353805	0.0120914	0	0	0.0169127	0.232121	0.0183944	0	0.0254095	0.0445045	0	0.0412542	0
ATGACGCGTTCTATCC-1	0.312106	0	0.172339	0.153356	0.0178299	1.05802e-05	0.00266004	0.0197208	1.46714e-06	0	0.000432245	0	0	0.0235297	1.21904e-05	0	0	0.020372	0.0557896	0.0493222	0.0557487	0.0312817	0.00372755	0.0173243	0	0.0429422	0.0214929
ATGACTATCAGCTGTG-1	0.174495	0	0.0130064	0.0462326	0.00462939	0.0908175	0.0936411	0.00684107	0.0369705	0	0.0829914	0.0402868	0	0.0238824	0	0.00728251	0.000879841	0	0	0.0275882	0.148785	0	0.00186903	0.0403681	0.0785018	0.0565735	0.0243582
ATGACTATGCGACATT-1	0.340888	0	0	0	0.0328975	0	0	0.00237311	0.0183372	0.0347163	0	0.000181534	0	0	0	0.0126135	0	0.0228902	0.026477	0.173181	0.17817	0.00733573	0	0.0929149	0.0183493	0.0386749	0
ATGAGGAGTGTTAATC-1	0.334526	0	0	0	0.0215079	0.0300563	0.0106444	0	0	0	0.0174887	0	0.0264847	0.00896171	0.00696619	0	0	0.0134265	0.0739304	0.456007	0	0	0	0	0	0	0
ATGATCGGGAATAGAC-1	0.233116	0.00115729	0.11781	0.0966815	0.0143698	0.191238	0	0.0188518	0.000105896	0.00966683	3.01504e-05	0	0	1.93045e-05	0.00909185	0.0136854	0	0	0.00597666	0.0795709	0.0753229	0.013477	0.026507	0.0722802	0	0.0210404	0
ATGATGCAATGGTACA-1	0.268453	0.0108394	0.0361991	0.0168685	0.0259506	0.00528441	0.0541041	0	0	0.00171196	1.87122e-05	0	0	0.0143627	0	0.00827138	0	0	0.0371812	0.137649	0.220042	0	0	0.0131043	0.0933828	0.0416389	0.0149376
ATGCACGCGCTGTTCA-1	0.192243	0	0	0	0.00236117	0.143402	0.289364	0.0728666	0.023461	4.08067e-07	0.0316812	0.0180949	2.57474e-06	4.40518e-07	0	0	0	0	0.0224918	0.022079	0.118607	2.26874e-06	0.00415805	0.0102067	0.0267631	0.0136714	0.00854271
ATGCACTACCGCATTG-1	0.317221	0	0	0	0.0137759	0.0317472	0	0.00105669	0	0.00717655	0.00887817	0	0	0.00679435	0	0	0	0	0.0877513	0.470288	0.00595735	0	0	0.0119205	0.00189443	0.0355386	0
ATGCATGATCCAGGAT-1	0.255016	0	0	0.00789334	0.0137747	0	0.0124173	0	0	0.0150746	0	0	0.0328241	0	0.0159973	0.00243378	0	0.00257199	0.0103694	0.120163	0.389498	0	0.0205248	0.0584048	0.0107504	0.0322865	0
ATGCATTCCGTGATGG-1	0.269344	0.0125451	0.0254473	0.0670987	0.0134862	0.0948266	0.0186263	0.00331544	0	0	0	0.0114813	0.0217269	0	0	0	0	0.0197115	0.00310906	0.245617	0.0382284	0	0.0174021	0.0975771	0	0.0404574	0
ATGCCAATCGCTCTGC-1	0.282763	0	0	0	0.0162305	0	0.00350997	0.0310012	1.89605e-06	0	0	0.00574922	0.00834057	0	0.00797741	0	0	0	0.0203443	0.0865273	0.116092	0.00705183	0.099417	0.236051	0.0388201	0.0260804	0.0140423
ATGCCATTTGCGACCA-1	0.294491	0	0	0.0112457	0.0108213	0.00902763	0	0	0	0.0110774	0	0	0	0.0246302	0	0	0	0	0.0265715	0.249366	0.123027	0.0340204	0.0259303	0.145029	0.0172949	0.0174685	0
ATGCCGGTCTTGCATA-1	0.224378	0	0.00964458	0.0086009	0.0129883	0	0.0470448	0	0.020275	0.0445501	0.0149246	0	0	0.00805105	0	0.0178166	0.00850096	0.0438105	0.0192613	0.105957	0.247124	0	0	0.0384138	0.0974722	0.0311866	0
ATGCCGGTTGATGGGA-1	0.242398	0	0.0247831	0.0246321	0.0118574	0.00114783	0	0.0230051	0	0.0238282	0	0.0280994	0.00491622	1.56187e-05	0.0352534	0.0307844	0	0.0160209	0.0214718	0.0562888	0.0636315	0.0131485	0.0560616	0.239563	0.0215999	0.0426298	0.0188633
ATGCGACAATTGGTCC-1	0.191644	0	0	0.0208689	0.0130599	0	0	0	0	0.0235464	0	0.00462365	0	0	0.00426236	0.016049	0	0.00570737	0.014163	0.195299	0.181273	0.0135279	0.0503161	0.203307	0.0282491	0.0341028	0
ATGCGACAGTCCCATT-1	0.334227	0	0	0.00364978	0.0225277	0	0.0400182	0	0.00511647	0.0103553	0	0	0	0	0.00484474	0.00768969	0.0316458	0.126193	0.0462451	0.0735296	0.198219	0.0109351	0	0	0.0735012	0.0102488	0.00105428
ATGCTCAGTGTTGCAT-1	0.208474	0.0422572	1.29351e-06	0	0.0103396	1.29403e-05	0	0	0	0	0.220969	0.00301259	0.207786	0.0486258	0	0.000917493	0	0.0250902	0	0.069617	0.047902	0	0.0860891	0.0141678	0	0.0147377	0
ATGCTCTGGCGCGGTA-1	0.407029	0	0.0175562	0.000543776	0.00783631	0.00244462	0.000711671	0.0239497	0.00528348	0.029279	0.008628	0.0174079	0.017633	0.0141585	0	0	0.00038393	0.00557202	0.0431061	0.151855	0.0972084	0	0.000310602	0.0959306	3.20049e-06	0.0223278	0.0308413
ATGGAAATTTAAGGAG-1	0.198826	0	0.000524631	0.0170993	0	0.296017	0.199219	0.0243539	0.00842662	0.0131397	0.0350877	0	0.0292919	0.0321526	0.0115147	0	0	0.00609779	0	0.0147978	0.0542391	0	4.03745e-06	2.31396e-06	0	0.0592066	0
ATGGAACAGAATAAAC-1	0.262428	0.000865467	0.0447362	0.0729998	0.0114499	0.0388737	0.0130051	1.77249e-06	0	0.0269713	0	0	0.00206379	0	0	0.0111115	0	0	0.0349388	0.0667095	0.062981	0.0127589	0.070542	0.192944	0.0268532	0.0477666	0
ATGGAGCAGGCCGTGA-1	0.334406	0	0.000702667	0	0.0250201	0	0.0541196	2.26605e-07	0	0.00113069	0.00475434	6.62114e-08	0	0	0	0	0.0205188	0.0469509	0.0181548	0.0892678	0.248795	0.00471448	0	0.0297596	0.0762373	0.0296462	0.0158212
ATGGATCCGGCGTCCG-1	0.255173	0	0.0593175	0.0632492	0.00470821	0.0337319	0	0.0170774	0.00375271	0.0275876	0	0	0.0163642	4.30026e-05	0	0.00955135	0	0.00500482	0.00376872	0.0646736	0.101678	0	0.0424777	0.179593	0.0358285	0.057067	0.0193514
ATGGATTGACCAAACG-1	0.215518	0	0	0.0118896	0.0245432	0	0.0113364	0	0.0127929	6.1651e-06	0	0	0.00733368	0	0.0271366	0.0271478	0	0.00556892	0.00178027	0.115501	0.407597	4.09857e-06	0.00447601	0.0726261	0.0251833	0.0295592	0
ATGGCAGCATTACGAT-1	0.178245	0	0	2.27647e-05	0.00355567	7.13399e-05	0.0840943	0.0125164	0.123036	0.109382	0.0449593	0.0161018	0.0702411	0.0306005	0	0	0	0.0194381	0.0250583	0.0397433	0.0855056	0	0.0751534	0.0247194	0.0424216	0.0151344	0
ATGGCAGCCGAGAAAC-1	0.148684	0.00261945	0.0288724	0.00329729	0.00335973	0.443335	0.0542045	0.00120102	3.73026e-05	0	0.0701472	0	0	0.0233833	0.00214188	0.00540071	0	0.00468814	0.0138678	0.0255225	0.0758545	0.00483037	0.0131571	0.0196054	0.00438677	0.0369879	0.0144152
ATGGCTGGAAATGGCC-1	0.255862	0	0.0768109	0.0554234	0	0.0140668	0	0	0	0.0499488	0	0.00624565	0.0076754	0.00373031	0.0194236	0.0487212	0	0.00636437	0.0146548	0.0459817	1.1763e-06	0.00935845	0.0332026	0.226271	0.0345111	0.0648316	0.0269154
ATGGGAACGGAAGCGG-1	0.263958	0	0.178082	0.113473	0.00774124	0.0498497	0	0	0	0.00337527	0	0.00984671	0.0226889	0	0.0158669	0.0400124	0	0.0281184	0.0137626	0.0129709	0.0690605	0	0.00647606	0.130169	0.00205937	0.0324888	0
ATGGGACCTGCTGAAC-1	0.192774	0	0	0.0624717	0.019113	0	0	0	0	0	0	0.0199912	0.0353213	0.0110012	0	0	0	0.0747613	0.0283444	0.374431	0.0262873	0.0535237	0.0169716	0.0301975	0.0515351	0	0.00327562
ATGGGCCTCGGCCTCT-1	0.22972	0	0	0.00607775	0.0143897	0	0.0366307	0.00189655	0.00464916	0.00279279	0	0	0	0	0	0.0140194	0	0.0233369	0.05536	0.332001	0.132098	0.0076752	0	0.100682	0.0219061	0.0167638	0
ATGGGTGTATACCTCC-1	0.131906	0	1.94548e-05	1.95142e-05	0.00677856	4.58484e-05	0.0125568	1.74716e-05	0.00574389	2.24995e-05	0.050489	0	0.365763	0.107229	0.0286001	0	0	0	0.00400632	0.0930075	0.0269437	0.00402694	0.0210834	0.0595317	0.0417353	0.0404739	0
ATGGTATTGGGAACCG-1	0.379254	0.00819003	0.00218898	0.0041576	0.0195198	0.000475221	0.0211094	0	9.20942e-06	0.00660195	0.00278438	0	0.0106642	5.39016e-07	0	0	0.00365752	0.126433	0.0215797	0.120478	0.205194	0	0	0.035378	0.0303032	0	0.00202093
ATGGTATTTACTGATT-1	0.313154	0	0	0.0385225	0.00426747	0.339394	0.0582983	1.31702e-06	0.0187076	1.00941e-05	0.00191384	0	0.0222572	0.0158385	0.0126155	0	0	0.00246871	0.0165958	0.0129957	0.039826	0	0	0.0361791	0	0.053412	0.0135419
ATGGTCGCGTGGTTTC-1	0.29419	0.00199285	0	0.00600631	0.0314741	0	0.00379614	0.030464	0.0210558	0.011996	0	0.00463139	0	0.00393161	0.00762749	0.00334544	0	0.0374105	0.0407243	0.198096	0.175675	0	0.000434953	0.0956245	0	0.0315226	0
ATGGTGCTCAAAGCCA-1	0.235982	0	0.0172471	0.0642406	0.0581791	0.088579	0	0.0105079	0	0	0.0162927	0.0215953	0.0192925	0	0.00419302	0	0.0059355	0.0176512	0.0256816	0.252685	0.0210289	0.000244021	0.00973245	0.0754869	0.0131324	0.0322765	0.0100362
ATGTAAGGCTGCTCTT-1	0.275443	0.00139189	0	0.00803813	0.00355682	0	0.00545603	0.0173782	0	0	0	0.0269329	0.00160476	0.0082173	0.00293624	0.0308387	0	0.0290073	0	0.0791954	0.0659999	0.00677409	0.092347	0.258811	0.0170212	0.0346022	0.034448
ATGTACGATGACGTCG-1	0.259106	0.0052537	0	0.039136	0.016164	0.00418819	0.0185905	0	0	0	0	0.018084	0	0.0247537	0.0266023	0	0	0.00893853	0.0211254	0.269338	0.1073	0.00617317	0.0289031	0.0954108	0.013526	0.037407	0
ATGTAGCGCGCGTAGG-1	0.244169	0	0	0	0.0130118	0.00487574	0.0119369	0.0212426	0.0096135	0.0078587	0	0.00638964	0.00596246	0	0	0	0	0.00902296	0	0.307771	0.0698011	0.0318498	0.0452488	0.12343	0.0643161	0.0189359	0.00456431
ATGTGAAAGCCTAATG-1	0.233253	0	0.352351	0.03133	0.0228165	5.12002e-07	0	0	0.000674483	0	0.0222553	0.0220018	0.0317561	0.0178985	0	0.0100981	0	0	0.0168149	0.104327	0.0306508	0	0.0105309	0.0288679	0	0.0643738	0
ATGTGCATCCGACGCA-1	0.370168	0	0	0.0547826	0.0187506	0.0601601	0	0	0	0.0022122	0	0	0	0	0	0	0	0	0.0464425	0.309657	0.0299189	0	0	0.0729686	0	0.0349392	0
ATGTGGACATCTTGAT-1	0.244339	0	0	0.000875408	0.0178277	0	0.00696269	0	0.0204017	0.0245272	0	0.0134929	0	0.0016078	0.00752903	0.00174366	0	0.0302189	0.0258546	0.24753	0.2014	0.0155536	0.00909239	0.0640823	0.0361986	0.0307628	0
ATGTGTAGTTTAGTCA-1	0.26258	0	0.119607	0.0647917	0.0214388	0.132167	0.00103964	0.00715952	0	0.00272087	0	0	0	0	0	0.0335946	0	0.0413044	0.0144024	0.129246	0.0510095	0.00410882	0	0.0626906	0	0.0521397	0
ATGTTACGAGCAATAC-1	0.118886	0	0.0275114	0	0.00617146	0	0	0.00049658	0.0477676	0.0763356	0.247126	0.0121458	0.0743004	0	0.00390135	0.00889061	0.00328074	0.00903904	0.0132987	0.137706	0.0696073	0	0.0908612	0.0259853	0.00704032	0.0196488	0
ATGTTCGTCGACCCAC-1	0.20671	0.00226856	0.00990018	8.53837e-07	0.012866	0.00300315	0.158657	0.0650536	0.0726946	0.0339183	0.0472266	0.0280436	0.00142668	0	0	0	0.0104453	0	0.0147952	0.0379323	0.180698	0	0.0305462	0.018284	0	0.0540241	0.0115057
ATGTTGTAGTCTGTTT-1	0.433247	0	1.66744e-06	0.0687018	0.045725	0.12476	0.0292793	0	0	0	6.04687e-05	0.0325295	0	1.398e-05	0	0	1.0484e-07	0	0.0462805	0.0375445	0.0697225	0	0.0366624	0.0127081	0	0.0627631	0
ATGTTTGTAAGATCAT-1	0.289964	0.00213058	0.0521043	0.043764	0.0116597	0.052682	0.00274611	0.00162387	0.0132882	0.0278504	5.55423e-06	0	0.0150472	0.00418658	0	0.0215894	0	0.00923789	0.0252085	0.0430735	0.0980511	0.0058892	0.0194892	0.144097	0.0155319	0.0438538	0.0569265
ATTAAACATGCGGACC-1	0.213582	0	0.0409295	0.0297135	0.0109598	0	0.0765446	0.00180575	0.00938264	0.00859503	0	0	0	0	0	0	0.00668415	0.0622798	0.0380733	0.0649919	0.275077	0	0	0	0.0975552	0.0408273	0.0229987
ATTAATACTACGCGGG-1	0.196126	0	0	0	0.023283	0	0	0	0	0	0	0.0105396	0.0144416	0	0.0171955	0.00313358	0	0.00191306	0	0.376338	0.20854	0	0.0185415	0.0624488	0.0127932	0.0547063	0
ATTAATGAACCAGTCG-1	0.211042	0	0.00140782	0.00432086	0.0166424	0	0.0229068	0	0	0	0	0.0044172	0.0197725	0	0.0306565	0.0260711	0	0.00605063	0.0189805	0.15278	0.335732	0.00219825	0.0192907	0.0810545	0.0261329	0.020543	0
ATTAATTCGGTCACTC-1	0.235161	0	0.0590412	0.0436332	0.018367	0.105537	0	0	0	0	0	0	0	0	0	0	0	0.00554375	0	0.322601	0.0506717	0	0.0282557	0.0659878	0.0100322	0.0551688	0
ATTACAACTACCGGCC-1	0.26226	0	0.0592352	0.0433764	0.00330491	0	0	0	0	0.0386023	0	0.0138815	0.0352992	0	0.00654476	3.16273e-06	0.0207238	0	0	0.114848	0.0211909	0	0.0509469	0.211675	0.0439498	0.0741584	0
ATTACGCGCTGGCAGG-1	0.269845	0	0.392765	0.0437686	0.00951916	0.0406185	0.0266392	0.00345172	0	0	0.0181476	0	0	0	2.68243e-07	0.00943942	0.00359729	0.00705872	0.0370724	0.049785	0.0331099	0.000553824	0.00108422	0.0117559	0.00896492	0.0328233	0
ATTACTAGCCTCTTGC-1	0.192146	0.00419422	0.0829606	0.12281	0.00465037	0.219291	0	0	0	0.00215849	0	0	0.0367622	0	0	0.0246524	0.00386276	0.00436947	0.0221304	0.107393	0.0520141	0	0.0156293	0.0531178	0.00678827	0.031738	0.0133319
ATTACTTACTGGGCAT-1	0.165738	0	0.018024	0	0.00341266	0	0	0.0136393	0	0.0209644	0	0	0	0	0.0333925	0.0471161	0	0.0263812	0	0.118267	0.0738603	0.0310447	0.102364	0.256131	0.0362661	0.0533979	0
ATTAGATTCCTCAGCA-1	0.289982	0	0.00617526	0	0	0	0.0252614	0.00271823	0	0	0	0	0	0	0.0288697	0.0208253	0	0.00213449	0.0280647	0.162223	0.090081	0.00832371	0.0486327	0.197609	0.0427869	0.0294894	0.0168235
ATTAGATTGATAGCGG-1	0.231842	0	0.0672734	0.118472	0.00826447	0.159016	0	0	0	7.1928e-07	0.0117331	0	0.0316985	0.0216788	0	0.025119	0.00282318	0	0.0163224	0.0362968	0.0915205	0.0346092	0.0184171	0.0780472	0.0262761	0.0136794	0.00691031
ATTAGGCGATGCTTTC-1	0.337143	0	0.00163891	0	0.0120587	0	0.0830554	0	0	0.0110549	0	0	0	0	0.00505311	0.00709679	0.00635969	0.0255998	0.0574743	0.0802471	0.222296	0.00374427	0	0.023691	0.0994324	0.00695142	0.0171032
ATTATACTTTGCTCGT-1	0.233601	0.00313735	0.0672766	0.0454186	0.013505	0.00963877	0	0	0	0.0353128	0	0	0.0155379	0	0.0195533	0.0144058	0.0042078	0	0	0.0613895	0.0713646	0.0145159	0.0870164	0.202485	0.0376916	0.0639422	0
ATTATAGCTACTTTAC-1	0.286434	0.00349033	0.048015	0.0325971	0.0139363	0.0165492	0.0110737	0.0292801	0	0.0304237	0	0	0	0	0.016428	0.0205956	0	0.00580016	0.0144746	0.071907	0.0256971	0	0.0699696	0.206946	0.0313438	0.0650388	0
ATTATCGGAATGTACG-1	0.198197	0.0132666	0.0165957	0.0227185	0.0160604	0.00291123	0.0311398	2.5267e-06	1.09758e-05	0.0527676	2.09844e-06	0.0105978	0	0.00418253	0.0341537	0.0153408	0	0.00767107	0.0186954	0.153534	0.237132	0.0136662	1.37386e-06	0.0721937	0.0298764	0.0492809	8.472e-07
ATTATCTCGACAGATC-1	0.227894	0.0187706	0.116978	0.0563297	0.0151918	0.202712	0	0	0	0	0	0	0	0	0	0.0126562	0	0.000401005	0.0175796	0.0666793	0.0431034	0.0195818	0.0683107	0.0642496	0	0.0695621	0
ATTATGAGACCCAATT-1	0.157025	0	0.0292413	0.0248745	0.00768309	0.398072	0.0889281	0	0.0298692	0.000115059	0	0.0215846	0	0.0136204	0.00650112	0	0	0.0160179	0.0198606	0.022173	0.0689738	0	0.0151777	0.00974648	0	0.0356847	0.0348519
ATTATGCCATAGGGAG-1	0.255836	0	0.101073	0.107986	0.018337	0.159111	0	0	0	0.0149013	0	0	0.00603255	0	0	3.92733e-05	0	0.0316957	0.0217979	0.103743	0.0529984	0.0243445	0	0.0640129	0.01749	0.020602	0
ATTATGCTCAGTATTG-1	0.261591	0	0.00110076	1.5879e-05	0.0285016	0	0	0	0	0.0190425	0	0	0	0	0	0	0.00752491	4.23962e-07	9.77014e-06	0.0559057	0.0312946	0.0439103	0.0627053	0.11192	0.0314255	0.342703	0.002349
ATTATTATGTCCGTCA-1	0.208641	0	0.0341387	0.0994087	0.00402418	0.00680856	1.97927e-05	0	0	0.0217101	0.0265159	0.0145383	0.00362655	0.00211994	0	0	0	0.0273098	0.0164533	0.0696561	0.0556064	0.123256	0.000383805	0.0412032	0.239585	0.00499561	0
ATTCACTGATGTTGGA-1	0.229544	0.0108603	0.0111406	0.020677	0.0124141	0	0.00487692	0.041933	0.0118662	0	0	0.00288467	0.0299506	0	0.00335502	0.00218788	0	0.0167046	0.0137896	0.165535	0.0926132	0.0132089	0.073874	0.154974	0.0713015	0.0163093	0
ATTCAGATGAATCCCT-1	0.220917	0.0102589	0	0.0620902	0.0175645	0.133042	0.0025352	0.00951989	0	0.0290892	0	0.0193236	0.00803797	0	0	0.0263501	0	0.0167223	0	0.0170687	0.0848953	0.0304028	0	0.170366	0.0346272	0.0585102	0.0486778
ATTCAGGACCTATTTC-1	0.263881	0.0125403	0.0109238	0.0176418	0.01818	0	0	0	0	0	0	0.0119726	0.0554267	0	0.00316355	0.0313312	0	0.0569872	0	0.047708	0.0721804	0.0171783	0.0530415	0.236505	0.0366447	0.0489876	0.00570676
ATTCAGGATCGCCTCT-1	0.244183	0	0.145975	0.0804591	0.00297285	0.117499	0	0	0	3.27466e-06	0	0.0162669	0	9.86693e-05	0	0.01151	0.0197896	0.117976	0.0297001	0.016653	0.0731656	0	0.00814656	0.1156	0	1.35349e-06	0
ATTCAGTAGCAGGGTC-1	0.197862	0.0183546	2.27028e-06	0.00585136	0.0243065	0.0122152	0.0010813	0	0	0	0.221615	0	0.204946	0.00889896	0	0	0.012193	0.0205754	0.0424342	0.124018	0.0579107	0	0.0186657	0.0290674	0	1.19761e-06	0
ATTCATATACTGTCCA-1	0.224695	0	0.0138676	0.045968	0.0225055	0	0.0345496	0	0	0	0	0.0186782	0	0	0.00411511	0.0276563	0	0.0222007	0.0296024	0.219331	0.252172	0	0	0	0.0460754	0.0385827	0
ATTCCCACATAAACAA-1	0.189674	0	0	0	0.0266335	0	0.0283064	0	0.0199243	0.0374924	0.263997	0	0.138833	0	0	0	0	0.0728804	0.043717	0.102347	0.050781	0	0	0.0254136	0	0	0
ATTCCTAAGACGTGGA-1	0.300859	0.00491966	0.0318931	0.00135648	0.0120267	0	0	0	0	0.00565816	0	0	0	0	0.00801322	0.0243011	0.00819297	0	0.0188413	0.0962858	0.111405	0	0.0590688	0.210549	0.0692314	0.0373976	0
ATTCCTCCGCCAGTGC-1	0.354902	0	0.0440019	0.0767454	0.0261825	0.123754	0	0	0	0.0124688	0.0104232	0.00867299	0	0	0	0.00169992	0.0130988	0	0.0401804	0.160103	0.0221315	0.00688707	0	0.0675208	0	0.0200022	0.0112254
ATTCCTTCCAGGCGGT-1	0.163772	0	0.0130041	0	0.0152362	0	0.0387543	0.0929177	0.195169	0.0572919	0.143191	0.016447	0	0	0	0	0.0102699	0.0655272	0.0202924	0.0444795	0.0685654	0.00736468	0.0257104	0.0111028	0	0.0109043	0
ATTCGACGCCGGGCCT-1	0.253274	0.00481868	0.198716	0.0142449	0.0374036	0	0.0392628	0	0	0	0.00767981	0	0.0257752	0	0	0	0	0	0.0300497	0.235608	0.0374011	0	0.0210389	0.0492912	0	0.0454365	0
ATTCTCGTCTCTTTAG-1	0.208852	0.000763789	0.0760941	0.0438808	0.0121487	0.184488	0.0106973	0	0	0	0	0	0	0	0	0	3.6387e-06	0	0.017227	0.320624	0.0433129	0.0181543	0	0.0174707	0.00609396	0.0401885	0
ATTCTGAGTATGAACT-1	0.249944	0	0.171186	0.105933	0.00442121	0.0484324	0	0.00985599	0	0.0238742	0	0.00327343	0	0	0	0.00415704	0	0	0	0.0231821	0.0388819	0.0171974	0.0248206	0.189969	0.0216921	0.0631788	0
ATTCTTCGTACTTATG-1	0.228652	0	0.116722	0.0681441	0.00199248	0.02363	0	0	0	0.0159154	0	0.00195562	0.038609	0.00465946	0.0128877	0.000562962	0	0.00689626	0.0311588	0.0448105	0.0591179	0.00136021	0.0465571	0.176917	0.0398447	0.0687178	0.0108897
ATTGAAGATCTTAGTG-1	0.257447	0.0126221	0.0165476	0	0.0229828	0.000310248	0.0175214	0.0388191	0.0393467	7.42966e-08	0	0.0173355	0	0.0046802	0.0163333	0	0.0101044	0.00390918	0.0167049	0.226171	0.154382	2.73509e-05	1.1023e-06	0	0.0946998	0.0432326	0.00682255
ATTGACCGGCGATGAC-1	0.287237	0	0	0.0259361	0.0279505	0	0	0.0230955	0.0227309	0.00682737	0	0.0137188	0	0	0.0105326	0.00344776	0	0.0054606	0.00331835	0.11778	0.0583427	0.033152	0.0564708	0.211959	0.053024	0.0390156	0
ATTGACGTAACTCGGT-1	0.228698	0.005358	0.0944025	0.0619959	0.016137	0.16815	0	0	0	0.00360011	0	0	0	0	0	0	0	0.00139357	0.0368875	0.18368	0.0446664	0.00217574	0.0457826	0.0606888	0.0144221	0.0319623	0
ATTGATAGCAACGAGA-1	0.175741	0	0.0173298	0	0.00463598	0	0.116054	0.17196	0.0950178	1.28512e-07	0.142743	0.011935	0	0	0.00271356	0.003971	0.00984471	0.00208123	0.0207025	0.0481333	0.0838138	0.00197637	0	0.0340128	0	0.0541568	0.00317632
ATTGATCACCACATTT-1	0.16004	5.43849e-09	9.33858e-07	0.0061634	0	0.235363	0.250564	0.0489642	0.0138828	0.00282532	0.0420731	5.83661e-08	0.0025127	0.0140078	0	0	0	1.75439e-06	0.023143	0.0168745	0.0652877	4.71234e-07	0.023019	0.0185212	1.16251e-07	0.0767544	1.44937e-07
ATTGATGAGTCCTAAC-1	0.267051	0	0.00671892	0.0217155	0.00729805	0.0149825	0.0144878	0	0.00680963	0	0	0	0.00277645	0	0	0.0197361	0	0.00181774	0.0280433	0.164418	0.0608964	0.0093141	0.0438635	0.223105	0.0369016	0.0467669	0.023298
ATTGCCTATTAGACCG-1	0.169923	0	0	0.0130918	0.00745451	0.0198049	0.0127416	2.04634e-05	0.0473927	0	0.0552545	0	0.380834	0.0989104	0	0.0125732	0	0.020115	0.0348421	0.0488085	0.0534017	0.00639398	0.011726	0	0.00186623	0	0.00484549
ATTGCGATCAGTAACT-1	0.283782	0	2.83726e-07	0	0	0	0.0207546	0.00638686	2.11509e-06	0	7.38294e-06	0.0183857	0	0	0	0	0.00602015	0	0.0719789	0.499549	0.0730771	0	0	0.0154094	0	0.00464642	0
ATTGCTGCTCCTCCAT-1	0.310713	0	0.045057	0.0278289	0.0341265	0.00544495	0.0216409	0.0148984	0.00474732	0.00635569	0.00811117	0.00243728	1.52551e-06	0.00862565	0	0	0.064127	0	0.0436546	0.197751	0.135152	0	0.0148845	0	0.0183555	0.0315565	0.00453072
ATTGGGAATATCTTGG-1	0.188017	0	0.0991703	0.0451104	0.000613544	0.174286	0.0217302	0.0109215	0	0.0136883	0	0	0	3.51356e-05	0.00128927	0.0382613	0	0.00301826	0	0.280559	0.0278016	0.00799153	0	0.0292419	0.00654219	0.0517227	0
ATTGGGAGTTCTGTAA-1	0.293901	0.00358323	0	0	0.0143794	0	0	0	0	0.000218222	0	0	0	0	0	0.0107812	0	0	0.0337259	0.0906976	0.106255	0.0398356	0.111734	0.231508	0.0221968	0.0411835	0
ATTGTACAACTCGGCT-1	0.25427	0	0.00864711	0.0284775	0.0142949	0	0	0	0.00300938	0	0	0.0108494	0	0.0336587	0.0244201	0	0	0	0.0287992	0.106358	0.0572544	0.0148779	0.0668606	0.268849	0.0398216	0.0395524	0
ATTGTCGCAATACCTT-1	0.324502	0.0040463	0.0540701	0.0481785	0.0440284	0.012275	0	0	0	0.0117004	0	0	0.0264032	0.0387607	0.00354703	0.00863098	0.00492847	0	0.0302753	0.0424501	0.0259575	4.35803e-06	0.0303848	0.194783	0.0338566	0.061217	0
ATTGTCTGTTTCATGT-1	0.230264	0	0.0196889	0.0747301	0.00391911	0	0.021233	5.12121e-05	0	0.0293575	0	0.0162585	4.50983e-06	0	0.044111	0.0143084	0	0	0.015662	0.115937	0.138363	0.000988152	0.0416841	0.151217	0.055524	0.0266981	0
ATTGTGACTTCGCTGC-1	0.218944	0.0261142	0.00428455	0	0.0401595	0	0	0	0	0	0	0	0	0	0	0	0	0.00549906	0	0.161522	0.155124	0.0279686	0.0701547	0.233408	0.0534617	0.00336006	0
ATTTAACTCGTATTAC-1	0.23762	0	0.147993	0.0606316	0.0179279	0.181151	0.00578003	0.00145401	0.00796472	0	0.00171827	0	0.00305994	0	0	0.0256201	0	0.00824455	0	0.0983506	0.0378187	0.0176839	0	0.066472	0.0233237	0.0571858	0
ATTTACTAAGTCCATT-1	0.261652	0	0.000453145	0.0197561	0.00489517	0	0.0309472	0.0278493	0	3.55736e-06	0	0.000544835	0.0215615	0	0.00227502	0.0359751	0	0.00772849	0.0136341	0.114904	0.0652869	0.0127814	0.0875263	0.197087	0.0390913	0.050675	0.00537301
ATTTCATTATTTCGCG-1	0.286881	0	0.095774	0.0871769	0.0178758	0.0769093	0	0	0.00111937	0	0	0.00035613	0	0	0.0152981	0	0	0.00359325	0.00564313	0.0515451	0.0654776	0.0113515	0.0256097	0.150244	0.0369041	0.0682411	0
ATTTCCGGGTTCTGCG-1	0.366373	0	0.0109299	0.224318	0.0255691	0.0217224	0.000800537	0	3.50133e-05	0	0.0120368	0.0200504	0.0119286	0.0060198	0	0	0.0107074	0.0663304	0.0519405	0.0905041	0.0228332	0	0	0.0127678	0.0127301	0.032403	0
ATTTGCCTAGTTACGA-1	0.291621	0	0.0639379	0.0537424	0.00649875	0.0140372	0	0	0	0.00924112	0.00861013	0.000774128	0.0108343	0.0147228	0	0.00905715	0	0.0069991	2.03927e-07	0.302945	0.0286045	0	0.0256388	0.126021	0	0.0267143	0
ATTTGCGCGAGTAGCT-1	0.340817	0.0211202	0.0966274	0.148639	0.0192798	0.00156919	0	0.00972822	0.0237621	0	0.0133627	0.00412527	0.00447799	0.0443712	0.00329793	0	0	0.0312737	0.0630404	0.0372209	0.0555241	0.0365979	0.00744022	0.0175128	0	0.0202125	0
ATTTGTCTTGGGAGCT-1	0.320076	0	0	0.0131295	0.021648	0	0	0.0264456	0.0130805	0	0	0	0	0.0100258	0	0.0185286	0.00669363	0.00436607	0.0448593	0.118262	0.23033	0.00554651	0.0486291	0.102488	0.0122286	0	0.00366186
ATTTGTTCCAGGGCTC-1	0.14826	0	0	0	0.0207711	0.0006762	0	0	0.00124686	0.0088864	0	0	0.0221178	0	0	0	0.00213354	0	0.0161176	0.609385	0.0638251	0	0	0.0551182	0.00662088	0.0448416	0
CAAACCCTCCGGCGGG-1	0.32806	0	0.0265009	0	0.0304035	0	0	0.00337165	0.021422	0	0	0.0119134	0	0	0	0	0	0.00867444	0	0.248345	0.113111	0.00468997	0.042131	0.0899583	0.031654	0.0397651	0
CAAACGAGTATCGCAG-1	0.257109	0	0.00913757	0.0371509	0.0202302	0.0132909	0.0575967	0.00862412	0.0142172	0	0	0	0	0.017348	0	0.0157312	0	0.0236004	0.022235	0.105015	0.222142	0.0053716	0	0	0.112102	0.0380067	0.0210909
CAAACGGTCGCACTTT-1	0.309722	0	0.00229229	0.00725025	0.00513496	0	0.00375377	0	0	0.00162946	0.00295768	0	0	0	0	0.00745108	0	0	0.0607933	0.52211	0	0	0.0154249	0.0331808	0.0282998	0	0
CAAACGTGGTCTTGCG-1	0.243254	0	0.093686	0.115282	0.0127331	0.11434	0.00969143	0	0	0.0345667	0	0	0.0167158	0	0.015552	7.78644e-06	0	0.00773202	0.0300738	0.0280222	0.042832	0	0.043457	0.0969987	0.0174084	0.0579901	0.0196572
CAAACTACGATAGAGA-1	0.219253	0	0.0643716	0.0875727	0.00689758	0.0576751	0	0	0	0.082291	0	0	0	0.0103011	0	0.0222138	0	0.020693	0.0135493	0.0318556	0.047687	0.0253585	0.0275261	0.176913	0.0634164	0.0424149	1.04643e-05
CAAACTATTGAGCTTC-1	0.216682	0	0.130905	0.073816	0.0139546	0.136935	0	0	0	0	0	0	0.0106166	0	0.0174115	0.0172356	0	0.0120686	0.0183503	0.110958	0.0700205	0.010356	0.0382394	0.0685463	0.00717982	0.0467245	0
CAAAGATTATTGGGCC-1	0.280889	0	0.0753888	0.0757812	0	0	0	0	0.000791123	0.0322153	3.28819e-06	0	8.24416e-06	0.000405667	0	0	0.0125834	0.132141	0.031195	0.0215036	0.0659491	0.0173864	0.0094672	0.0160372	0.210034	0.0170441	0.00117611
CAAAGGTTAAATTCAG-1	0.217825	0.00150678	0.0161937	0	0.0253576	3.27831e-08	0	0	1.13819e-05	0.0213732	0	0.0149756	0.0381865	3.49752e-06	3.14544e-05	0.0268516	0	0	0.0644723	0.0750702	0.138951	0.0230849	0.0957495	0.18924	0.0185503	0.0325652	0
CAAATCTCTCACAAGG-1	0.158791	0	0.615641	0.0489115	0.0154984	0.01137	0	0	0	9.62213e-06	0	0	0.0061195	0.00181352	0	0	0	0.0101729	0.0176552	0.0359549	0.0140373	0.0100328	0.0121878	0	0	0.0418046	0
CAAATGCGGAGTGTTC-1	0.142835	0	0.0321667	0.0191729	0.0147415	0.0384964	0.00335337	0.0143057	0	0	0.0195429	0	0.0304446	0.0230316	0	0.00990469	0.00806555	0.0423245	0	0.489598	0.00080163	0	0	0.0512622	0	0.0466108	0.0133422
CAAATGTCCTTCCGTG-1	0.256675	0	0.0142135	0.0082173	0.0138224	0	0.043924	0	0.00982757	0.00264695	0	0	0	0	0	0	0	0.0124393	0.0606421	0.213323	0.20671	0	0.0170637	0.00921995	0.0852509	0.046024	0
CAAATTGGATTATGCC-1	0.303977	0	4.8115e-07	0.00401708	0.0175742	0	0	0.00657214	0	2.58389e-06	0	0.0236665	5.67319e-06	0.0148244	0.000222177	0.0394129	0.00820281	0	0.0218859	0.107383	0.0282965	0	0.0783555	0.213283	0.0415607	0.0508311	0.0399265
CAAATTGTCAGCAAGC-1	0.219814	0	0.0668517	0.0643704	0.0144517	0.144883	0.0116825	3.21479e-06	0	0.0162422	0.00480324	0	0	1.145e-06	0	0.00391106	0.00610805	0	0.0148366	0.272655	0.0424123	0	0.0019208	0.0687639	1.24815e-06	0.046288	0
CAACAGAATAACGCTA-1	0.304517	0	0.139584	0.0810473	0.004019	0.0854715	0	0	0	0	0	0	0.00126214	0	0.0273445	0.00226433	0	0.0360848	0	0.024359	0.0764919	0	0.0180968	0.13423	0.0188537	0.0463738	0
CAACAGTGCCAAACGG-1	0.258023	0	0.0890991	0.0217891	0.0128538	0.10365	0	0.00128904	0	0.0255763	0	0	0.052343	6.04566e-07	0.0345758	0.0142081	0	0.0163876	0.0158626	0.202548	0.0396811	0.00570685	0	0.0638506	0	0.0425555	0
CAACGACCCGTTTACA-1	0.256312	0	0.073483	0.0916525	0.0391765	0.162969	0	0	0.00824623	0	0	0	0	0	0	0.0130644	0	2.27473e-07	0.0624919	0.171569	0.0419446	0.0168519	0	0.0375844	0	0.0246537	0
CAACGGTTCTTGATAC-1	0.245811	0	0.0199456	0.0651995	0.00593455	0.126823	8.08062e-06	0.00209611	0.0124505	0	0.020652	0	0.0198905	0.00647404	0	0	0	0.00634585	0.0227632	0.243126	0.0570535	0.0059617	0	0.0627334	0	0.0711672	0.00556353
CAACTATATCGAATGC-1	0.212196	0.0010303	0.0965083	0.0928152	0.0107005	0.0419839	0	0	0	0.0839416	0	0	0.0296746	0	0	0	0	0.0123247	0	0.0226032	0.0625342	0.0263394	0	0.183581	0.0513141	0.0724528	0
CAACTCCAACGTTTAG-1	0.278433	0	0.19004	0.104972	0.00453859	0.0954499	0	0.0111089	0	0	0	0.012927	0	0	0	0.00388906	0	0	0.0099732	0.0151668	0.0733317	0	0	0.146756	0	0.0417412	0.011672
CAACTCCTTGATCCCG-1	0.172909	0.00134029	0.11871	0.157852	0.015054	0.21748	1.0069e-05	0.0123004	0	0.00069609	0	0	0.00878666	0	0	0.0121414	0	0	0.0186624	0.0449863	0.05021	0.00193794	0.0419927	0.0745106	0	0.0504197	0
CAACTGCTCATCCGAT-1	0.336424	0	0	0	0.122175	0.0332239	0	0	0	0	0.0171673	0	0	0	0	0.00165718	0.097382	0.0149035	0.0136202	0.0749433	0.0360608	0	0.0776117	0.031705	0.0492685	0.0938578	0
CAACTTGTAGTGGGCA-1	0.235373	0	0	0.0212572	0.0116711	0.0449232	0.02335	0	0	0	0.023218	0	0.0275678	0	0.0206143	0	0.00849014	0	0.0195181	0.517188	0.00647403	0.00400806	0	0.0210463	0	0.0153014	0
CAAGAGGGCGGAGTAC-1	0.273098	0	0.0329083	0.0220061	0.014977	0	0	0	0	0.017981	0	0	0	0	0	0.0379866	0	0.0222851	0.0275865	0.150073	0.270822	5.9208e-06	0	0.116806	0	0.0134647	0
CAAGATATTATAACGT-1	0.198432	0	0.00508757	0.00481411	0.0292143	0	0.0115857	0	0.0190272	0.0310715	0	0.000929046	0	0	0	0.0483099	0	0.0162547	0.00780402	0.287396	0.0879343	0	0	0.171434	0.0305405	0.0501638	0
CAAGCAACGTCGGAGT-1	0.305683	0	0.0192906	0	0.0243194	0.00196594	0.00442303	0	0	0	0	0.000700481	0	0	0	0	0	0	0.0748062	0.513588	0	0	0	0.0117629	0.0153339	0.0281263	0
CAAGCACCAAATGCCT-1	0.187103	0.00413531	0.0312263	0.0427378	0.0116902	0.10771	0	0	0	0	0	0	0	0	0.021611	0.0105112	0	0.00290122	0.0254908	0.336043	0.0689304	0.00312266	0.0136749	0.0594264	0.0305938	0.0430913	0
CAAGCGGCACATAATT-1	0.179385	0.00247962	0.0272211	0.0533079	0.0154514	0.00264442	0.0083691	0	0	5.22969e-06	0	0.0268176	0.0179526	0.0250773	0	0.0156502	0	0.00937132	0	0.119209	0.0975748	0.0186079	0.0751606	0.203796	0.0520471	0.0498718	0
CAAGGATCGCATGTTC-1	0.237313	0	0.0305302	0.00559089	0.0106509	0	0.0977589	0.0204327	0.0150597	0.00297601	0	0	0	0	0.0109855	0	0	0.0121237	0.0295827	0.133075	0.232388	0.00030906	0	0	0.093347	0.0385976	0.0292786
CAAGGGAGTGTATTTG-1	0.261043	0	0.0363263	0.00374743	0.0244444	0.381662	0	0.00881036	0.0244007	0	0.0403864	0.00471397	4.20321e-08	0	0	0.00858859	0.00795274	0.0505221	0.0293146	0.0142975	0.0309045	0.00271454	0.0148084	0.0271048	0.0130055	0.0152519	2.45434e-07
CAAGGTCCTATAGGCT-1	0.275795	0	0.0235978	0.0186306	0.0165838	0	0.0135704	0.0280738	0.0105441	0.0219276	0	0	0.00398844	0.00961533	0.00997763	0.0317308	0	0	0.0290555	0.0712305	0.0185888	0	0.0886227	0.259397	0.0430685	0.0260019	0
CAAGTGAACTTTGGTT-1	0.245513	0	0.119517	0.0753536	0.0264492	0.173633	0.00791092	0.0108657	0	0.0335871	0	0	0	0	0	0.00456169	0	0.00768035	0.0200357	0.0880754	0.0564474	0	0.0113617	0.06384	0	0.0551676	0
CAAGTGTGGTTGCAAA-1	0.194889	0	0.0204656	0	0.0276419	0	0	0.0174576	0	0.0122088	0	0.0291585	0.00748157	0.000292723	0.0262703	0.0429227	0	0.00575509	0.0096207	0.0725002	0.197912	0.0224169	0	0.172244	0.090395	0.0503624	5.34162e-06
CAATAAACCTTGGCCC-1	0.290914	0	0	0	0.016402	0	0.0203491	0	0	0	0	0	0	0	0.0402513	0.00602348	0	0.0540922	0.00357479	0.1485	0.302556	0	0.0147132	0.0622597	0.00710197	0.0332618	0
CAATACGCTCTGAGGC-1	0.174178	0.000981785	0	0.00449413	0.00431313	0.109633	0.246436	0.1239	0.0622935	0.00587492	0.0723131	0	0	0	0.0134075	0	0	0.0170977	0	0.0235323	0.0629511	0	0	0.0294973	0.0170994	0.0319974	0
CAATATGTAGATTTAC-1	0.262001	0	0.00639873	0.0378483	0.0112042	0.011806	0	0.000710681	0	0.0314996	0	0.00612201	0.0261992	0	0.026701	0.0201192	0	0.00715467	0.0190485	0.115173	0.0635656	0.00605596	0.0458376	0.225103	0.0295574	0.0226795	0.0252146
CAATATTCTTGACCTA-1	0.10315	0	0.0505493	0.636043	0.00699803	0.0242937	2.7933e-08	0.00536229	0	3.54615e-06	0	0	0	0.0112445	0	0.0202414	0.0160311	0.00895429	0.0164719	0.0118356	0.0186788	0	0.0122553	0.00207958	0.024181	0.0316266	0
CAATATTGGACTAGTG-1	0.223943	0	0.00266188	0.0125173	0.00857883	0.415362	0.0355852	0	0.0121279	0	0.0882706	0	0	0	0	0.00880472	0	0.033698	0.0162881	0.0170487	0.0840202	0.0044723	0.0018525	0.0237596	0	0.000195504	0.0108136
CAATCCATTATCCGTT-1	0.2347	0.0027337	0.113461	0.0758793	0.00826545	0.069545	0.0293928	0.0183402	0	0.0116333	0	0	0	0.00748472	0	0.017511	0	0.0429884	0.0106026	0.0270372	0.058728	0.0220008	0.0345411	0.162992	0.0213439	0.0308188	0
CAATCCCTATACCAGC-1	0.169071	0.00210733	1.91155e-06	0.0265188	0.00803589	0.020226	0	7.40055e-06	0	0.0241614	0	0	4.8317e-06	0	0	0.0209805	0.0054896	0.00602157	0.0200735	0.551598	0.00391474	0.00354838	0	0.0716833	0.0178094	0.0487465	0
CAATCCTGCCGTGGAG-1	0.193949	0	0.00931358	5.59087e-08	0.0207236	0.00365547	0.0165125	0.0413197	0.173978	0.0851266	0.1562	0	0.0222264	0	0	0.0113073	0	0.0223717	0	0.031717	0.102074	0.00411609	0.0400021	0.0252931	0	0.0401133	0
CAATGCGAGAAGTATC-1	0.440327	0	8.62908e-07	0.00928007	0.0217332	0	1.2012e-08	0	0	0.0381566	0	6.38595e-07	0	0	0	0	0.00401907	0	0.0257317	0.0768074	0.268639	5.74836e-07	0.0163563	0.0702544	0.0112989	0.0173941	0
CAATGGAATCTACATA-1	0.231284	0.0147405	0.167656	0.0493579	0.0022194	0.0408486	0	0	0	0.0593076	0	0.00720605	0.0194879	0.00709332	0.0216806	0.0231519	0.00391309	0	0	0.044112	0.021179	0.00591941	0.00939917	0.197106	0.0274202	0.0469178	0
CAATGGATCTCTACCA-1	0.201999	0	6.99715e-06	0.00817583	0.0203801	0	0.00394485	0.0267988	0.011549	0	0	0.0185675	0.00348321	0	0.0380074	0.045404	0	0.014984	0.00495846	0.133665	0.265575	8.46354e-08	0.0165123	0.126719	0.0215203	0.0312857	0.00646468
CAATGGTCGGCCTGGG-1	0.206071	0	0.131474	0.0688559	0.0120849	0.187753	0.00750553	0.00837605	0.00373244	0.0235815	0.0116702	0.0067757	0.0129916	1.18231e-05	0	0	0	0.00483828	0.0175504	0.101285	0.0525195	0.0021688	0.0310146	0.0622266	0	0.0475131	0
CAATTAAGGGTGATGA-1	0.210297	0	0.00100396	0	0.00972336	0.0132066	0.0788597	0.00753628	0	0.00220335	0.0104651	0	0	0.0126686	0	0	0	0.0484813	0.0191066	0.168447	0.252414	0	0	0.0154898	0.0894167	0.0325439	0.028137
[truncated: 2,563 more rows]

## Sheet: S9
Supplementary Table S9: Niche effect on cell type-specific gene module in the AD dataset
[truncated: 13 more rows]
