# Supplementary material for: Deciphering Microenvironmental Heterogeneity by Scalable Niche Guided Module Discovery
Source: Research Square preprint supplement (doi:10.21203/rs.3.rs-7243521/v1), 2025-08-25
Supplement: Supplementary file 14 [file Supplementary Tables S17-S21.xlsx]

## Sheet: S17
Supplementary Table S17: Estimations of gene module activities of tumor cells in the LUAD dataset
Tumor cell	Module1	Module2	Module3
0-4	0.107293	0.313975	0.578732
45934	0.0176367	0.606454	0.375909
100-4	0.0135822	0.689025	0.297393
10025-4	0.202187	0.0928692	0.704944
10038-4	1.55056e-05	0.308123	0.691862
101-4	0.0359898	0.668224	0.295786
10116-4	0.0369149	0.213436	0.749649
10183-4	0.00115874	0.406481	0.592361
102-4	0.0292807	0.588078	0.382641
10256-4	0.000783503	0.296271	0.702945
1036-4	3.51827e-05	0.465405	0.53456
1039-4	0.091712	0.199155	0.709133
104-4	0.0165647	0.601824	0.381611
10619-4	0.00141095	0.352263	0.646326
107-4	0.0126564	0.621917	0.365426
45965	0.00970656	0.568768	0.421526
11011-4	0.0432416	0.367362	0.589396
111-4	0.0168599	0.579328	0.403812
11132-4	0.182183	0.25661	0.561207
11156-4	0.0197081	0.356957	0.623335
11169-4	0.000607422	0.432608	0.566785
11191-4	0.00178651	0.147654	0.85056
11197-4	0.194913	0.263036	0.542052
113-4	0.0956631	0.327898	0.576439
11315-4	0	0.176753	0.823247
11456-4	0.0751819	0.30574	0.619078
11484-4	0.0446214	0.326589	0.628789
115-4	0.0346208	0.668363	0.297016
11521-4	0.423841	0.00875162	0.567408
118-4	0.0244475	0.566778	0.408774
11813-4	0.0994486	0.267889	0.632662
11854-4	0.00491462	0.300836	0.694249
11880-4	0.217364	0.212465	0.570171
11924-4	0.00199371	0.276794	0.721213
45995	0.018788	0.619557	0.361655
120-4	0.0331742	0.571237	0.395588
121-4	0.0361685	0.597647	0.366184
12108-4	6.01684e-05	0.272928	0.727012
12111-4	0.291895	0.159309	0.548796
12152-4	0.0261089	0.320168	0.653723
1218-4	0.0826317	0.164354	0.753014
122-4	0.0350174	0.584082	0.380901
12256-4	0.161967	0.504481	0.333552
123-4	0.0296776	0.564578	0.405744
1236-4	0.0992442	0.243522	0.657234
12416-4	0.020796	0.289935	0.689269
12423-4	0.119285	0.170843	0.709873
125-4	0.114052	0.307629	0.578319
12533-4	0.0755598	0.268282	0.656158
126-4	0.0530437	0.57537	0.371587
12691-4	0.0280205	0.27973	0.69225
128-4	0.11745	0.300557	0.581993
12808-4	0.196391	0.075978	0.727631
12810-4	0.0243535	0.310039	0.665608
12812-4	0.00190055	0.22831	0.769789
12886-4	0.136955	0.150305	0.71274
12896-4	0.0741143	0.0497303	0.876155
12911-4	0.00320889	0.310288	0.686503
45760	0.0285946	0.589685	0.381721
130-4	0.0846747	0.447404	0.467921
13039-4	0.000572965	0.00918785	0.990239
131-4	0.0402012	0.531245	0.428554
13115-4	0.0958945	0.136455	0.767651
13129-4	0.0808287	0.1163	0.802872
13139-4	0.0819316	0.136244	0.781824
13166-4	0.0344806	0.168785	0.796734
13197-4	0.046043	0.156848	0.797109
132-4	0.00485739	0.601457	0.393686
13239-4	0	0.591769	0.408231
13262-4	0.00941836	0.212733	0.777849
1327-4	0.0257587	0.365044	0.609197
13281-4	0.055647	0.157565	0.786788
133-4	0.0371939	0.571395	0.391411
13367-4	0.000359117	0.338156	0.661485
134-4	0.02506	0.648179	0.326761
13420-4	0.0306813	0.169312	0.800007
13449-4	0.0315215	0.15452	0.813959
135-4	0.097235	0.417368	0.485397
13538-4	0.0178541	0.371952	0.610194
13566-4	0.00108323	0.161477	0.83744
13567-4	0.0593797	0.230199	0.710421
13570-4	0.15749	0.183049	0.659461
13576-4	0.0125882	0.164219	0.823192
136-4	0.0249483	0.588488	0.386563
1361-4	0.000490976	0.189434	0.810075
13622-4	0.033918	0.335919	0.630163
1365-4	0.0467894	0.354592	0.598619
138-4	0.015295	0.578203	0.406502
1381-4	0.111023	0.216137	0.672839
1387-4	0.0338559	0.182937	0.783207
139-4	0.00819337	0.593797	0.39801
1393-4	0.0580442	0.254016	0.68794
13975-4	0.0486164	0.254731	0.696653
13986-4	0.00182807	0.175544	0.822628
45761	0.0293955	0.581052	0.389553
140-4	0.00577432	0.592355	0.40187
1400-4	0.125949	0.197086	0.676966
14018-4	0.0363041	0.115197	0.848499
1403-4	0.0351366	0.170677	0.794187
14030-4	0.207093	0.239754	0.553153
14031-4	0.0457546	0.105846	0.848399
14036-4	0.0852556	0.0891682	0.825576
1404-4	0.101582	0.242124	0.656294
14050-4	0.00279568	0.329641	0.667563
14097-4	0.0497737	0.248953	0.701274
141-4	0.036839	0.622163	0.340998
14118-4	0.00336215	0.388413	0.608225
142-4	0.0340162	0.675502	0.290482
14200-4	0.0212312	0.00809683	0.970672
1421-4	0.102152	0.221087	0.676761
14218-4	0.206654	0.131248	0.662098
1424-4	0.0948445	0.231447	0.673709
14243-4	0.00336843	0.566732	0.4299
143-4	0.0413897	0.668856	0.289754
14331-4	0.000899821	0.211383	0.787717
14346-4	0.0363243	0.185578	0.778097
14368-4	0.067368	0.156395	0.776237
144-4	0.0317306	0.603106	0.365164
14410-4	0.00596598	0.332498	0.661536
14489-4	0.0601474	0.354166	0.585686
145-4	0.000333949	0.596074	0.403592
14523-4	0.0564427	0.597207	0.34635
14524-4	0.0403498	0.57427	0.38538
14525-4	0.0647269	0.614879	0.320394
14531-4	0.0527344	0.586022	0.361243
14532-4	0.0481578	0.552025	0.399818
14536-4	0	0.126879	0.873121
14537-4	0.0514088	0.61975	0.328841
14550-4	0.111789	0.353664	0.534547
14562-4	0.0248802	0.632729	0.342391
14563-4	0.0529008	0.610096	0.337004
14571-4	0.0329998	0.597503	0.369498
14572-4	0.0411125	0.531972	0.426916
14573-4	0.000484674	0.293976	0.70554
14574-4	0.0351513	0.512928	0.451921
14575-4	0.0519919	0.62155	0.326458
14580-4	0.0399453	0.636391	0.323664
14581-4	0.0342227	0.585611	0.380166
14583-4	0.0530982	0.52632	0.420582
14589-4	0.0926692	0.484068	0.423263
14590-4	0.0461544	0.631169	0.322677
14594-4	0.0308391	0.63567	0.333491
14596-4	0.0407636	0.577714	0.381522
14597-4	0.0310093	0.633361	0.33563
146-4	0.070393	0.553077	0.37653
14603-4	0.0432266	0.641939	0.314834
14606-4	0.0562366	0.595338	0.348425
14607-4	0.02924	0.648913	0.321847
14614-4	0.0451493	0.563723	0.391128
14615-4	0.0521359	0.461345	0.486519
14617-4	0.0407036	0.552587	0.40671
14618-4	0.0290392	0.608828	0.362133
14620-4	0.0610819	0.488745	0.450173
14621-4	0.0530517	0.634033	0.312915
14626-4	0.0434938	0.635807	0.320699
14633-4	0.1726	0.275471	0.551929
14634-4	0.0251834	0.588222	0.386594
14635-4	0.0554709	0.635231	0.309298
14639-4	0.0334838	0.640177	0.326339
14641-4	0.0423403	0.630427	0.327233
14643-4	0.0530431	0.632615	0.314342
14649-4	0.0538469	0.469471	0.476682
14657-4	0.0343264	0.59975	0.365924
14664-4	0.0555696	0.438314	0.506116
14670-4	0.0681014	0.339244	0.592654
14675-4	0.0660487	0.434589	0.499363
14676-4	0.0593225	0.587858	0.35282
14677-4	0.0752457	0.610518	0.314236
14678-4	0.0414183	0.628758	0.329824
14681-4	0.0508548	0.52704	0.422105
14682-4	0.057949	0.575675	0.366376
14691-4	0.0617968	0.631556	0.306647
14692-4	0.0518285	0.636001	0.31217
14693-4	0.0468748	0.633608	0.319517
14697-4	0.167175	0.282771	0.550054
14698-4	0.169523	0.36918	0.461297
147-4	0.000385182	0.619317	0.380297
14700-4	0.0781651	0.609684	0.312151
14704-4	0.0437417	0.633172	0.323087
14707-4	0.0560854	0.602023	0.341892
14712-4	0.0583238	0.562913	0.378763
14714-4	0.0907529	0.378582	0.530665
14728-4	0.0619832	0.62476	0.313257
14732-4	0.0517053	0.63094	0.317354
14736-4	0.0954915	0.522275	0.382233
14737-4	0.0628524	0.553624	0.383524
14741-4	0.10687	0.376411	0.516719
14745-4	0.0880006	0.544227	0.367773
14754-4	0.0720711	0.599457	0.328472
14758-4	0.0454789	0.616722	0.337799
14762-4	0.105595	0.518134	0.376271
14771-4	0.0620559	0.632595	0.305349
14772-4	0.0860812	0.368722	0.545197
14773-4	0.0613379	0.618267	0.320395
14776-4	0.0780678	0.438232	0.4837
14781-4	0.0664661	0.533373	0.400161
14784-4	0.0808839	0.607651	0.311465
14786-4	0.169636	0.262951	0.567413
14787-4	0.00407875	0.264761	0.73116
14793-4	2.95618e-05	0.287226	0.712745
14798-4	0.0828013	0.580465	0.336733
148-4	0.0285546	0.704894	0.266551
14802-4	0.0561949	0.624224	0.319581
14811-4	0.0907127	0.562956	0.346332
14813-4	0.0877716	0.594175	0.318054
14816-4	0.0767999	0.60933	0.31387
14820-4	0.0753236	0.539129	0.385547
14821-4	0.0655513	0.541715	0.392733
14822-4	0.085186	0.599117	0.315697
14825-4	0.16097	0.294145	0.544885
14828-4	0.174862	0.245393	0.579745
14834-4	0.0758682	0.537159	0.386973
14835-4	0.093895	0.578404	0.327701
1484-4	0.0888754	0.233826	0.677298
14840-4	0.065775	0.610866	0.323359
14851-4	0.0709304	0.371843	0.557227
14853-4	0.115905	0.492982	0.391113
14862-4	0.088443	0.593167	0.31839
14866-4	0.0657425	0.610817	0.32344
14874-4	0.108666	0.566761	0.324573
14882-4	0.0602247	0.377557	0.562218
14885-4	0.0733386	0.571081	0.355581
14890-4	0.103504	0.574514	0.321982
14895-4	0.0836131	0.526772	0.389615
14901-4	0.063915	0.545936	0.390149
14902-4	0.0867962	0.329756	0.583447
14907-4	0.0773951	0.52512	0.397485
14913-4	0.0920486	0.331847	0.576104
14915-4	0.0828751	0.59225	0.324875
14916-4	0.0669225	0.615958	0.317119
14917-4	0.0613783	0.613784	0.324838
14925-4	0.0827988	0.573814	0.343388
14927-4	0.10603	0.534416	0.359554
14930-4	0.154849	0.295959	0.549192
14931-4	0.0884917	0.45914	0.452368
14947-4	0.0794644	0.565643	0.354892
14949-4	0.0983612	0.567361	0.334278
14950-4	0.101995	0.572513	0.325492
14957-4	0.0878969	0.445746	0.466357
14967-4	0.0776408	0.529579	0.392781
14975-4	0.0524117	0.553181	0.394407
14976-4	0.0520755	0.548679	0.399246
14978-4	0.0674552	0.367243	0.565301
14981-4	0.0590451	0.618181	0.322774
14982-4	0.0666983	0.622464	0.310838
14986-4	0.045048	0.385217	0.569735
14988-4	0.0820663	0.590195	0.327739
14994-4	0.104291	0.566125	0.329584
45762	0.0328194	0.596716	0.370465
15001-4	0.0330298	0.554826	0.412144
15014-4	0.0524206	0.55233	0.395249
15018-4	0.0397682	0.559247	0.400985
15022-4	0.0931476	0.582385	0.324467
15027-4	0.056816	0.561289	0.381895
15037-4	0.0746946	0.500604	0.424701
15040-4	0.0400876	0.396441	0.563472
15042-4	0.086383	0.577747	0.33587
15046-4	0.0633453	0.52569	0.410964
15047-4	0.0823276	0.59725	0.320422
15049-4	0.0345394	0.515386	0.450075
15051-4	0.0178068	0.474857	0.507336
15052-4	0.0996169	0.562805	0.337578
15053-4	0.023926	0.409716	0.566358
15054-4	0.0264585	0.428553	0.544988
15057-4	0.0595375	0.562558	0.377905
15062-4	0.0269846	0.577878	0.395138
15078-4	0.0275821	0.528919	0.443499
15083-4	0.0335797	0.566295	0.400126
15090-4	0.0449541	0.427769	0.527277
15092-4	0.0359481	0.547502	0.41655
15099-4	0.0707106	0.506468	0.422822
151-4	0.0640605	0.482052	0.453887
15100-4	0.0767254	0.538757	0.384518
15108-4	0.0283823	0.507851	0.463767
15109-4	0.0318961	0.570494	0.39761
15110-4	0.0653746	0.272799	0.661826
15113-4	0.0988236	0.562519	0.338658
15114-4	0.119153	0.544463	0.336384
15117-4	0.0340082	0.440141	0.525851
15121-4	0.0191996	0.423142	0.557658
15123-4	0.0330914	0.43507	0.531839
15124-4	0.0172756	0.48949	0.493234
15125-4	0.0824829	0.566055	0.351462
15137-4	0.100065	0.563809	0.336126
15142-4	0.0262658	0.551392	0.422343
15144-4	0.021018	0.520315	0.458667
15149-4	0.0274023	0.505966	0.466632
15150-4	0.0477968	0.536155	0.416048
15159-4	0.0184544	0.438666	0.54288
15160-4	0.0318076	0.442042	0.52615
15168-4	0.0142392	0.578618	0.407143
15169-4	0.0307135	0.558485	0.410801
15174-4	0.147589	0.508294	0.344117
15175-4	0.0120959	0.588557	0.399347
15176-4	0.0284389	0.447999	0.523562
15180-4	0.00479488	0.584162	0.411043
15184-4	0.0450048	0.528391	0.426605
15185-4	0.0644976	0.527769	0.407734
15186-4	0.0909368	0.540267	0.368796
15190-4	0.000194606	0.586388	0.413417
15194-4	0.0461931	0.53062	0.423187
15197-4	0.113673	0.540963	0.345364
15198-4	0.170959	0.48784	0.341201
152-4	0.0198957	0.578871	0.401233
15207-4	0.0363439	0.543411	0.420245
15211-4	0.00871508	0.580335	0.41095
15217-4	0.0145377	0.568494	0.416968
1522-4	0.0455491	0.229618	0.724833
15221-4	0.0214632	0.441205	0.537331
15222-4	0.0484012	0.552108	0.399491
15226-4	0.0275091	0.529693	0.442798
15227-4	0.0308549	0.548049	0.421096
15236-4	0.0485926	0.497359	0.454048
15242-4	0.0157239	0.576829	0.407447
15262-4	0.00220546	0.58638	0.411415
15263-4	0.0269793	0.433015	0.540006
15266-4	0.0359149	0.54394	0.420145
15270-4	0.0202147	0.576972	0.402813
15271-4	0.111304	0.531745	0.356951
15278-4	0.0127932	0.582894	0.404312
15279-4	0.0321572	0.567868	0.399975
15289-4	0.0318742	0.550036	0.41809
15292-4	0.0208074	0.443511	0.535682
15296-4	0.000833834	0.586884	0.412282
15297-4	0.0198878	0.570625	0.409487
15298-4	0.0203343	0.572358	0.407308
15306-4	0.0814362	0.53662	0.381944
15310-4	0.031268	0.553604	0.415128
15312-4	0.0180483	0.439719	0.542233
15317-4	0.0340836	0.396905	0.569011
15319-4	0.0448378	0.484502	0.47066
15320-4	0.0194609	0.562975	0.417564
15327-4	0.0297774	0.436237	0.533985
15330-4	0.00535197	0.326144	0.668504
15331-4	0.0570687	0.551753	0.391178
15334-4	0.045123	0.504046	0.450831
15340-4	0.0322926	0.566626	0.401082
15355-4	0.0402891	0.433662	0.526049
15361-4	0.0358381	0.545307	0.418855
15363-4	0.0622871	0.453391	0.484322
15367-4	0.0339183	0.433961	0.532121
15368-4	0.0616025	0.462096	0.476302
15372-4	0.0275688	0.30381	0.668621
15377-4	0.0381171	0.433685	0.528197
15389-4	0.0413218	0.432247	0.526432
15394-4	0.0291279	0.552897	0.417975
154-4	0.10262	0.310228	0.587152
15408-4	0.0369535	0.478547	0.4845
15412-4	0.0799023	0.528403	0.391695
15414-4	0.0711591	0.414685	0.514156
15415-4	0.0226082	0.23777	0.739622
15417-4	0.0228041	0.509726	0.46747
15422-4	0.0731203	0.44814	0.47874
15423-4	0.0426108	0.477687	0.479702
15425-4	0.0734395	0.431637	0.494924
15426-4	0.0352667	0.440815	0.523919
15428-4	0.0830972	0.438276	0.478627
15432-4	0.00031373	0.316713	0.682973
15435-4	0.0369147	0.554769	0.408316
15452-4	0.0494993	0.42016	0.530341
15454-4	0.0315106	0.55921	0.409279
15457-4	0.0788731	0.440752	0.480374
15459-4	0.0181718	0.574494	0.407335
15462-4	0.0365573	0.499736	0.463706
15467-4	0.0690996	0.434575	0.496325
15468-4	0.000693157	0.580075	0.419232
15472-4	0.0711606	0.443359	0.485481
15473-4	0.0613834	0.518245	0.420371
15493-4	0.000596518	0.271935	0.727469
15494-4	0.0485436	0.457886	0.49357
155-4	0.11796	0.293612	0.588428
15504-4	0.070116	0.439668	0.490216
15520-4	0.042381	0.49132	0.466299
15528-4	0.0328158	0.554519	0.412665
1554-4	0.110335	0.220722	0.668943
15548-4	0.0445304	0.463783	0.491686
15551-4	0.0482284	0.485461	0.466311
15559-4	0.0298294	0.548423	0.421748
15564-4	0.0640913	0.444789	0.49112
15565-4	0.0526001	0.47634	0.47106
15575-4	0.0292679	0.553888	0.416844
15577-4	0.0571646	0.464737	0.478099
15580-4	0.023123	0.555812	0.421065
15589-4	0.0606708	0.448468	0.490862
15598-4	0.029407	0.554014	0.416579
156-4	0.0165004	0.585166	0.398333
15601-4	0.0470762	0.486122	0.466802
15605-4	0.0412026	0.500151	0.458647
15606-4	0.0417157	0.544057	0.414228
15620-4	0.0419489	0.469901	0.48815
15621-4	0.0215867	0.554136	0.424278
15638-4	0.0438576	0.522927	0.433216
15642-4	0.0206723	0.548587	0.430741
15647-4	0.0492762	0.458479	0.492245
1565-4	0.0556156	0.255487	0.688897
15666-4	0.0343407	0.510781	0.454878
15675-4	0.0432622	0.478017	0.478721
15680-4	0.0524669	0.507373	0.44016
15692-4	0.0787231	0.40339	0.517887
15693-4	0.0261972	0.565733	0.40807
15699-4	0.0491814	0.523913	0.426905
1570-4	0.0103185	0.176069	0.813612
15706-4	0.0306359	0.542519	0.426845
15717-4	0.0500396	0.258258	0.691702
1572-4	0.0377979	0.471654	0.490549
15738-4	0.0245559	0.558494	0.41695
15741-4	0.0241789	0.552922	0.422899
15743-4	0.0135858	0.566524	0.41989
15745-4	0.0367408	0.535029	0.428231
15752-4	0.079528	0.38283	0.537642
15756-4	0.0644469	0.426538	0.509015
15757-4	0.0192609	0.560867	0.419873
15772-4	0.0283731	0.554912	0.416715
1578-4	0.0937275	0.223336	0.682937
15784-4	0.0122653	0.565163	0.422571
15808-4	0.000128656	0.569901	0.42997
15828-4	0.0154911	0.572033	0.412476
15870-4	0.0432503	0.536506	0.420244
15873-4	0.00386357	0.559045	0.437092
15878-4	0.0001576	0.56648	0.433363
15895-4	3.06508e-05	0.550516	0.449454
159-4	0.0102821	0.630482	0.359236
15910-4	0.026371	0.543403	0.430226
45763	0.0439625	0.61256	0.343477
160-4	0.024716	0.617475	0.357809
16037-4	0.0250125	0.506086	0.468901
161-4	0.0335081	0.58254	0.383952
163-4	0.0248676	0.580944	0.394188
164-4	0.0212901	0.677876	0.300834
1641-4	0.00626449	0.27187	0.721866
165-4	0.128472	0.291201	0.580326
1654-4	0.0449595	0.21421	0.740831
16553-4	0	0.199583	0.800417
16561-4	0.000457576	0.396829	0.602714
1657-4	0.0227179	0.273729	0.703553
166-4	0.00687624	0.651429	0.341695
16624-4	0.0367399	0.326045	0.637215
168-4	0.0293663	0.573292	0.397341
16846-4	0.00108853	0.219306	0.779605
169-4	0.0720078	0.542634	0.385359
45764	0.0259128	0.653391	0.320696
170-4	0.0661954	0.470391	0.463413
17010-4	0.00529575	0.346256	0.648448
17059-4	0.00502812	0.329517	0.665455
17071-4	0.00804702	0.321112	0.670841
1709-4	0.000786713	0.461606	0.537607
172-4	0.0193713	0.579583	0.401046
17217-4	0	0.353451	0.646549
17220-4	0.00883851	0.32089	0.670271
17236-4	0.000927078	0.134473	0.8646
17282-4	0.00225962	0.350736	0.647005
173-4	0.0448822	0.584149	0.370969
17350-4	0.000518426	0.314413	0.685068
17475-4	0	0.177162	0.822838
17551-4	0.12201	0.18895	0.68904
176-4	0.0267181	0.621451	0.351831
17616-4	0.0775451	0.257239	0.665215
17617-4	0.040612	0.399194	0.560194
177-4	0.0131961	0.561853	0.424951
1773-4	0.0563249	0.244807	0.698868
178-4	0.0688632	0.536141	0.394996
17806-4	0.00314901	0.287943	0.708908
17912-4	0.000454077	0.32183	0.677716
1797-4	0.118884	0.037992	0.843124
45765	0.0171571	0.670271	0.312572
180-4	0.025349	0.602213	0.372438
1802-4	0.111421	0.0388598	0.84972
18054-4	0.0461354	0.349291	0.604574
18063-4	0.0444987	0.20812	0.747382
18064-4	0.00104743	0.209078	0.789875
18070-4	0.0506144	0.339413	0.609973
18085-4	0.0443687	0.33755	0.618082
18126-4	0.0518896	0.191564	0.756546
18243-4	0.00835708	0.278003	0.71364
18260-4	0.0138646	0.143611	0.842524
183-4	0.000962689	0.607073	0.391964
18316-4	0.00158918	0.275646	0.722765
184-4	0.0293421	0.578457	0.392201
18428-4	0.00513436	0.0796185	0.915247
18465-4	0.0607272	0.569129	0.370144
18466-4	0.0744893	0.563604	0.361907
18467-4	0.0724512	0.558775	0.368774
18468-4	0.0545327	0.592983	0.352484
18469-4	0.0429662	0.595177	0.361856
18470-4	0.0453509	0.579922	0.374727
18471-4	0.0403971	0.584161	0.375442
18472-4	0.0314974	0.598611	0.369892
18473-4	0.0356307	0.600595	0.363775
18474-4	0.0233411	0.615009	0.36165
18475-4	0.0184044	0.626469	0.355126
18476-4	0.0453659	0.637839	0.316795
18477-4	0.0565919	0.626821	0.316587
18478-4	0.0495881	0.637063	0.313349
18479-4	0.0433903	0.646663	0.309947
18480-4	0.0365192	0.648387	0.315094
18481-4	0.0468245	0.638266	0.314909
18483-4	0.0388945	0.647909	0.313196
18486-4	0.0958208	0.498514	0.405665
18487-4	0.0322851	0.588397	0.379318
18490-4	0.0573274	0.633561	0.309112
18492-4	0.0472942	0.626958	0.325748
18493-4	0.0389232	0.63642	0.324657
18495-4	0.0577717	0.624651	0.317577
18497-4	0.0314469	0.590924	0.377629
185-4	0.0110378	0.573025	0.415938
18501-4	0.0550441	0.58078	0.364176
18504-4	0.0492602	0.612404	0.338336
18505-4	0.0594097	0.590605	0.349985
18509-4	0.0520261	0.634654	0.313319
18510-4	0.0465108	0.498459	0.45503
18526-4	0.0463323	0.617693	0.335975
18529-4	0.174936	0.283256	0.541808
18531-4	0.082784	0.388878	0.528338
18544-4	0.0590333	0.367923	0.573044
18546-4	0.174715	0.279145	0.54614
18548-4	0.0818285	0.533367	0.384805
18553-4	0.117742	0.388571	0.493687
18555-4	0.0943515	0.554837	0.350811
18558-4	0.0586306	0.617493	0.323876
18561-4	0.0546542	0.621829	0.323517
18565-4	0.116271	0.394815	0.488914
18570-4	0.10642	0.566931	0.326649
18574-4	0.0836556	0.39612	0.520224
18577-4	0.0930763	0.517391	0.389533
18584-4	0.0193068	0.406538	0.574155
18585-4	0.0394931	0.561519	0.398988
18588-4	0.0344602	0.541759	0.423781
18598-4	0.0115473	0.52756	0.460893
18599-4	0.0757859	0.497215	0.427
186-4	0.0431276	0.671297	0.285575
18601-4	0.0281107	0.554113	0.417777
18603-4	0.0184761	0.531531	0.449993
18624-4	0.0325712	0.42045	0.546979
18629-4	0.141068	0.458637	0.400295
18636-4	0.0544404	0.541263	0.404297
18640-4	0.0570999	0.537843	0.405057
18647-4	0.0464329	0.418771	0.534797
18652-4	0.0674638	0.433538	0.498999
18666-4	0.0627096	0.456201	0.481089
18676-4	0.0528718	0.451187	0.495941
18682-4	0.0402497	0.517898	0.441853
1869-4	0.0405611	0.264627	0.694812
18691-4	0.0395923	0.509375	0.451033
18692-4	0.191156	0.509151	0.299693
18698-4	0.0546843	0.443971	0.501344
187-4	0.0314672	0.590317	0.378215
18701-4	0.0293023	0.550649	0.420049
18707-4	0.0442001	0.454157	0.501643
18717-4	0.0366318	0.464822	0.498546
18721-4	0.0281644	0.55356	0.418276
18724-4	0.10087	0.389207	0.509923
18730-4	0.0202006	0.559448	0.420351
18745-4	0.00433362	0.577268	0.418398
188-4	0.0211568	0.641622	0.337221
18858-4	5.16623e-06	0.330421	0.669574
1886-4	0.0249827	0.140311	0.834707
18888-4	0.00436564	0.29901	0.696624
189-4	0.0200087	0.597168	0.382823
190-4	0.0179214	0.698275	0.283804
191-4	0.00784413	0.60599	0.386166
4840	0.0563417	0.351301	0.592358
19234-4	2.14507e-06	0.177128	0.82287
8858	0.0363704	0.264331	0.699299
193-4	0.026409	0.569601	0.40399
19348-4	0.0338615	0.423321	0.542818
12875	0.0428477	0.269421	0.687731
19357-4	0.00839938	0.209981	0.78162
194-4	0.0256595	0.591179	0.383162
19408-4	0.00850675	0.172687	0.818806
19437-4	0.0212925	0.307387	0.67132
195-4	0.0188477	0.608835	0.372318
19532-4	0.0163082	0.128512	0.85518
19533-4	0	0.129926	0.870074
19554-4	0.000731744	0.213147	0.786122
19575-4	0.0620571	0.654647	0.283296
19576-4	0.0637337	0.659082	0.277185
19577-4	0.32716	0.414399	0.258441
19578-4	0.119927	0.632601	0.247471
19579-4	0.100194	0.642321	0.257485
19584-4	0.0988531	0.598446	0.302701
19585-4	0.22246	0.486814	0.290726
19586-4	0.000386186	0.645769	0.353845
19590-4	0.067793	0.650531	0.281676
19591-4	0.0751322	0.633082	0.291785
19594-4	0.0194903	0.714455	0.266054
19595-4	0.066362	0.653905	0.279733
19597-4	0.0371355	0.696784	0.26608
19599-4	0.0636994	0.65914	0.27716
196-4	0.0250035	0.612162	0.362835
19600-4	0.00977167	0.644669	0.345559
19602-4	0.0740712	0.649891	0.276038
19603-4	0.203969	0.495737	0.300294
19606-4	0.070249	0.640869	0.288881
19607-4	0.200399	0.566458	0.233143
19608-4	0.161693	0.606653	0.231655
19609-4	0.0765684	0.646422	0.27701
19610-4	0.079994	0.647882	0.272124
19611-4	0.0638384	0.656451	0.279711
19612-4	0.316612	0.451137	0.23225
19617-4	0.0499494	0.663396	0.286655
19618-4	0.263856	0.509634	0.22651
19619-4	0.0795537	0.636694	0.283752
19623-4	0.236424	0.46793	0.295646
19624-4	0.0644613	0.652227	0.283312
19627-4	0.070788	0.6462	0.283012
19628-4	0.0374694	0.644581	0.31795
19629-4	0.00414144	0.636273	0.359586
19631-4	0.0347473	0.616787	0.348466
19633-4	0.252668	0.455868	0.291464
19634-4	0.0668507	0.648132	0.285018
19635-4	0.0171578	0.640691	0.342151
19636-4	0.106984	0.601749	0.291267
19637-4	0.0350684	0.710914	0.254018
19638-4	0.084025	0.62643	0.289545
19639-4	0.0703784	0.645588	0.284034
19641-4	0.0266862	0.657769	0.315545
19643-4	0.282319	0.481007	0.236674
19645-4	0.308106	0.44715	0.244744
19646-4	0.034487	0.711445	0.254068
19647-4	0.0523249	0.641056	0.306619
19648-4	0.0754068	0.637239	0.287354
19649-4	0.0709491	0.648198	0.280853
19650-4	0.0147783	0.672343	0.312878
19652-4	0.107496	0.427001	0.465503
19653-4	0.116057	0.607488	0.276455
19655-4	0.0705332	0.641334	0.288133
19656-4	0.233886	0.521543	0.244571
19657-4	0.24981	0.464167	0.286023
19658-4	0.190192	0.570168	0.23964
19659-4	0.0463606	0.64384	0.3098
19661-4	0.072948	0.640164	0.286888
19662-4	0.0747674	0.635812	0.28942
19665-4	0.0117084	0.674125	0.314167
19668-4	0.0739151	0.643784	0.2823
19669-4	0.0386623	0.654364	0.306974
19670-4	0.12506	0.596348	0.278592
19672-4	0.0107253	0.658825	0.33045
19675-4	0.317993	0.430973	0.251034
19676-4	0.0767492	0.653123	0.270128
19677-4	0.0757308	0.639482	0.284788
19678-4	0.14725	0.56913	0.28362
19680-4	0.322846	0.445118	0.232036
19681-4	0.0690028	0.657596	0.273401
19682-4	9.62537e-05	0.653499	0.346405
19685-4	0.118485	0.602646	0.278869
19686-4	0.105761	0.609376	0.284863
19687-4	0.286126	0.483169	0.230705
19689-4	0.149282	0.576988	0.27373
19690-4	0.0841225	0.634269	0.281608
19692-4	0.0298934	0.652268	0.317839
19693-4	0.0307839	0.69313	0.276086
19694-4	0.0159763	0.693476	0.290548
19696-4	0.021785	0.684742	0.293473
19697-4	0.0461854	0.702161	0.251654
19698-4	0.0454778	0.704581	0.249942
197-4	0.0193119	0.651378	0.32931
19700-4	0.0119132	0.68574	0.302347
19702-4	0.0777257	0.641472	0.280802
19703-4	0.18502	0.542241	0.27274
19704-4	0.0201661	0.659914	0.31992
19707-4	0.165174	0.55459	0.280236
19708-4	0.0996534	0.631489	0.268857
19710-4	0.134302	0.587835	0.277864
19711-4	0.00757191	0.67597	0.316458
19713-4	0.29645	0.468833	0.234716
19714-4	0.0523356	0.524045	0.42362
19715-4	0.00632043	0.704887	0.288792
19716-4	0.0337275	0.679279	0.286993
19717-4	0.076439	0.645286	0.278275
19718-4	0.052815	0.643346	0.303839
19722-4	0.0924647	0.626142	0.281394
19723-4	0.267603	0.464194	0.268202
19724-4	0.140831	0.591775	0.267394
19725-4	2.57578e-05	0.650418	0.349556
19730-4	0.0515889	0.659142	0.28927
19732-4	0.267331	0.492394	0.240276
19735-4	0.0362315	0.644929	0.31884
19736-4	0.0438318	0.644	0.312168
19737-4	0.153919	0.574461	0.27162
19738-4	0.0645853	0.636802	0.298613
19739-4	0.266366	0.472293	0.261341
19740-4	0.08677	0.631223	0.282007
19743-4	0.179858	0.545939	0.274203
19744-4	0.31337	0.423612	0.263017
19745-4	0.0303137	0.682406	0.28728
19747-4	0.0400475	0.682418	0.277535
19748-4	0.268075	0.461952	0.269973
19749-4	0.00253603	0.708644	0.28882
19750-4	0.00100847	0.678116	0.320876
19751-4	0.3034	0.439779	0.256821
19752-4	0.265455	0.492285	0.24226
19753-4	0.153979	0.583485	0.262537
19754-4	0.0060453	0.660759	0.333196
19756-4	0.0649244	0.683528	0.251548
19757-4	0.0770707	0.646235	0.276694
19758-4	0.157903	0.571956	0.270141
19759-4	0.19183	0.546619	0.261551
19760-4	0.1353	0.604856	0.259844
19761-4	0.0477362	0.670762	0.281502
19762-4	0.0172691	0.671714	0.311016
19763-4	0.242692	0.496062	0.261246
19764-4	0.286465	0.451689	0.261846
19765-4	0.0258693	0.690712	0.283419
19766-4	0.0310241	0.68502	0.283955
19768-4	0.011634	0.637819	0.350546
19769-4	0.0547954	0.642148	0.303056
19772-4	0.0983316	0.620846	0.280822
19773-4	0.182071	0.551273	0.266656
19774-4	0.0775355	0.61229	0.310174
19775-4	0.206697	0.543704	0.249599
19777-4	0.000136301	0.660413	0.339451
19778-4	0.0938548	0.636175	0.26997
19779-4	0.152182	0.581066	0.266751
19780-4	0.0200927	0.682674	0.297233
19783-4	0.0241822	0.662823	0.312994
19784-4	0.000259658	0.655155	0.344586
19786-4	0.0460904	0.674529	0.279381
19787-4	0.266441	0.483158	0.250401
19790-4	0.175728	0.559706	0.264566
19791-4	0.281193	0.455746	0.263061
19792-4	0.0623833	0.654733	0.282883
19794-4	0.0815574	0.657863	0.26058
19795-4	0.106991	0.62332	0.269689
19796-4	0.121566	0.592252	0.286182
19797-4	0.0330349	0.68414	0.282825
19798-4	0.0134289	0.712592	0.273979
19800-4	0.114938	0.612998	0.272065
19801-4	0.255905	0.483761	0.260334
19802-4	0.0267708	0.693977	0.279252
19803-4	0.156444	0.581005	0.262551
19804-4	0.0115365	0.64331	0.345153
19807-4	0.315102	0.403307	0.281591
19808-4	0.00225827	0.672298	0.325444
19810-4	0.0508157	0.65242	0.296765
19813-4	0.184988	0.557123	0.257889
19814-4	0.227765	0.522654	0.249581
19817-4	0.0518319	0.664152	0.284017
19818-4	0.0646603	0.655422	0.279917
19819-4	0.05463	0.648877	0.296493
19821-4	0.214949	0.524223	0.260827
19822-4	0.0153542	0.651211	0.333435
19823-4	0.00849485	0.643866	0.347639
19826-4	0.0252341	0.640504	0.334262
19827-4	0.138124	0.610477	0.251399
19828-4	0.000378946	0.665481	0.33414
19830-4	0.285415	0.458283	0.256302
19832-4	0.15475	0.593281	0.251969
19833-4	0.0457667	0.669895	0.284338
19834-4	0.265854	0.476192	0.257955
19835-4	0.0114878	0.643104	0.345408
19836-4	0.120368	0.620389	0.259243
19837-4	0	0.611746	0.388254
19838-4	0.217075	0.527275	0.25565
19839-4	0.12567	0.616639	0.257691
19840-4	0.119863	0.618472	0.261665
19841-4	0.203646	0.543701	0.252653
19842-4	0.0202812	0.69718	0.282539
19843-4	0.0503785	0.677668	0.271954
19844-4	0.281134	0.467989	0.250877
19845-4	0.0200618	0.621687	0.358252
19846-4	0.0485313	0.669319	0.282149
19847-4	0.207992	0.535418	0.256591
19848-4	0.277098	0.461253	0.261649
19851-4	0.0393777	0.641415	0.319207
19852-4	0.0745729	0.658088	0.26734
19853-4	0.0370504	0.637474	0.325475
19854-4	0.116694	0.611301	0.272005
19855-4	0.295325	0.42237	0.282305
19856-4	0.0257964	0.616194	0.35801
19857-4	0.224983	0.517689	0.257328
19858-4	0.0385185	0.642137	0.319344
19860-4	0.0612888	0.66288	0.275832
19861-4	0.0270887	0.628979	0.343932
19863-4	0.132813	0.608546	0.258641
19864-4	0.0556016	0.665464	0.278935
19865-4	0.0499286	0.667664	0.282407
19866-4	0.0670678	0.666129	0.266803
19867-4	0.14838	0.553404	0.298216
19868-4	0.0469906	0.671663	0.281346
19869-4	0.223177	0.526496	0.250328
19871-4	0.0490902	0.633187	0.317723
19872-4	0.00330018	0.651359	0.345341
19875-4	0.150006	0.601617	0.248377
19877-4	0.019635	0.641846	0.338519
19878-4	0.305711	0.38558	0.308709
19880-4	0.0424283	0.675247	0.282324
19881-4	0.0607947	0.657359	0.281846
19882-4	0.0177624	0.641217	0.34102
19883-4	0.139162	0.6035	0.257338
19884-4	0.134296	0.611882	0.253823
19885-4	0.0184906	0.67422	0.30729
19886-4	0.130688	0.561745	0.307567
19887-4	0.147135	0.595336	0.257529
19888-4	0.217049	0.534537	0.248414
19889-4	0.233759	0.519091	0.24715
19893-4	0.0304404	0.621057	0.348502
19894-4	0.0170194	0.628478	0.354503
19895-4	0.0548924	0.617588	0.32752
19896-4	0.219396	0.52838	0.252224
19897-4	0.00242807	0.65837	0.339202
19898-4	0.0570486	0.668538	0.274414
19899-4	0.235319	0.516752	0.247929
199-4	0.00365192	0.636298	0.360051
19901-4	0.0616154	0.664561	0.273824
19902-4	0.266336	0.419663	0.314001
19903-4	0.0122838	0.635469	0.352247
19904-4	0.0542826	0.66651	0.279208
19905-4	0.16003	0.592813	0.247157
19906-4	0.0656161	0.661748	0.272636
19907-4	0.00295574	0.639986	0.357058
19908-4	0.240921	0.505656	0.253422
19909-4	0.0561108	0.668229	0.27566
19911-4	0.0380299	0.669034	0.292936
19914-4	0.00186326	0.633791	0.364345
19916-4	0.153064	0.592689	0.254248
19917-4	0.151393	0.593977	0.25463
19919-4	0.140046	0.59633	0.263625
33695	0.126239	0.240271	0.63349
19920-4	0.128933	0.615033	0.256034
19921-4	0.0342758	0.629304	0.33642
19922-4	0.159411	0.593211	0.247378
19923-4	0.230901	0.530906	0.238193
19924-4	0.239228	0.505512	0.25526
19925-4	0.247021	0.486325	0.266654
19926-4	0.0104569	0.679782	0.309761
19928-4	0.0450628	0.624076	0.330861
19930-4	0.188525	0.525209	0.286266
19931-4	0.0197689	0.662385	0.317847
19932-4	0.0426221	0.627099	0.330279
19933-4	0.211861	0.545983	0.242157
19934-4	0.00820561	0.627054	0.364741
19936-4	0.167566	0.582629	0.249805
19940-4	0.141247	0.592237	0.266516
19941-4	0.0495896	0.661206	0.289205
19943-4	0.141617	0.608147	0.250236
19944-4	0.170119	0.586106	0.243774
19946-4	0.027398	0.630829	0.341773
19947-4	0.185719	0.572247	0.242034
19948-4	0.0514003	0.627998	0.320602
19949-4	0.157005	0.588407	0.254589
19950-4	0.0390493	0.625429	0.335521
19951-4	0.0164815	0.637688	0.345831
19953-4	0.0644574	0.656898	0.278645
19954-4	0.258655	0.486412	0.254933
19955-4	0.064352	0.657466	0.278182
19956-4	0.0330114	0.628908	0.338081
19957-4	0.0329	0.627596	0.339504
19958-4	0.267174	0.470781	0.262045
19959-4	0.183748	0.57338	0.242872
19960-4	0.0170301	0.637106	0.345864
19961-4	0.191502	0.570575	0.237922
19962-4	0.198872	0.561572	0.239556
19964-4	0.0445668	0.625175	0.330258
19965-4	0.0390784	0.624928	0.335994
19966-4	0.157403	0.596176	0.246421
19967-4	0.0543779	0.652464	0.293158
19968-4	0.00267992	0.625878	0.371442
19969-4	0.0175469	0.633117	0.349336
19970-4	0.157419	0.594727	0.247853
19972-4	7.50852e-05	0.661749	0.338176
19973-4	0.0499935	0.620787	0.32922
19974-4	0.000156306	0.610553	0.38929
19975-4	0.0238101	0.677693	0.298497
19976-4	0.0602355	0.647395	0.29237
19977-4	0.266733	0.406333	0.326934
19978-4	0.0167786	0.621634	0.361587
19981-4	0.0256333	0.633929	0.340438
19982-4	0.166943	0.581949	0.251109
19983-4	0.204535	0.556364	0.239101
19984-4	0.207718	0.503249	0.289033
19985-4	0.165776	0.58667	0.247554
19986-4	0.166182	0.575493	0.258325
19987-4	0.18283	0.569972	0.247199
19988-4	0.0103416	0.621621	0.368037
19990-4	0.231707	0.536932	0.231361
19993-4	0.151058	0.583481	0.265461
19994-4	0.157544	0.583092	0.259364
19995-4	0.0503252	0.661642	0.288033
19996-4	0.269413	0.416454	0.314134
19998-4	0.00714045	0.62891	0.36395
19999-4	0.0419619	0.62331	0.334729
45767	0.014316	0.604752	0.380932
200-4	0.0271634	0.575847	0.396989
20000-4	0.00214202	0.627923	0.369935
20001-4	0.0304005	0.679007	0.290592
20003-4	0.0685659	0.640649	0.290785
20005-4	0.191355	0.567854	0.240791
20006-4	0.174784	0.581834	0.243382
20007-4	0.17077	0.583865	0.245365
20008-4	0.202677	0.559755	0.237569
20009-4	0.0434545	0.674742	0.281804
20010-4	0.201421	0.55966	0.238919
20011-4	0.180262	0.579935	0.239803
20013-4	0.0221928	0.626703	0.351104
20014-4	0.165929	0.589508	0.244563
20015-4	0.265922	0.416898	0.31718
20016-4	0.0235608	0.624021	0.352418
20017-4	0.00457751	0.608861	0.386562
20019-4	0.24003	0.462431	0.297539
20020-4	0.0465382	0.63069	0.322772
20021-4	0.189483	0.565054	0.245463
20022-4	0.0330479	0.679412	0.28754
20023-4	0.213281	0.548676	0.238043
20024-4	0.222597	0.55158	0.225824
20025-4	0.0412925	0.619269	0.339438
20026-4	0.0458818	0.662409	0.291709
20029-4	0.0589584	0.628399	0.312643
20030-4	0.000836085	0.616749	0.382415
20031-4	0.203097	0.556564	0.240339
20033-4	0.0208536	0.62892	0.350227
20034-4	0.16292	0.570877	0.266203
20035-4	0.0346358	0.685472	0.279892
20036-4	0.266187	0.412484	0.321329
20037-4	0.0366935	0.681338	0.281968
20038-4	0.0517969	0.632634	0.315569
20039-4	0.0616181	0.628568	0.309814
20040-4	0.26123	0.425044	0.313725
20041-4	0.262951	0.428513	0.308536
20043-4	0.00838426	0.607437	0.384179
20044-4	0.176858	0.582827	0.240315
20045-4	0.0133724	0.630713	0.355914
20047-4	0.0581521	0.615097	0.326751
20048-4	0.154969	0.597579	0.247451
20050-4	0.00602158	0.612675	0.381304
20051-4	0.00236193	0.605936	0.391702
20052-4	0.231798	0.543103	0.225099
20053-4	0.241271	0.551434	0.207295
20055-4	0.196876	0.560027	0.243097
20056-4	0.000294363	0.616104	0.383601
20057-4	0.0298905	0.637177	0.332933
20058-4	0.0167445	0.690906	0.29235
20059-4	0.000342007	0.637294	0.362364
20061-4	0.0262821	0.627572	0.346146
20064-4	0.186736	0.575268	0.237996
20066-4	0.141861	0.604794	0.253344
20067-4	0.0967864	0.617546	0.285668
20068-4	0.0268652	0.614118	0.359017
20069-4	0.181616	0.579717	0.238667
20070-4	0.146199	0.590902	0.262899
20071-4	0.0557128	0.624639	0.319649
20072-4	0.156753	0.591911	0.251337
20073-4	0.270235	0.417698	0.312067
20075-4	0.285121	0.49244	0.222439
20076-4	0.0436521	0.684265	0.272083
20078-4	0.0194782	0.617059	0.363463
20079-4	0.180532	0.574636	0.244832
20080-4	0.151481	0.586807	0.261712
20081-4	0.171986	0.557573	0.270442
20082-4	0.0731443	0.654394	0.272462
20084-4	0.0497514	0.681449	0.268799
20085-4	0.149456	0.598338	0.252206
20086-4	0.209158	0.554331	0.23651
20088-4	4.09847e-05	0.628958	0.371001
20089-4	0.12018	0.586862	0.292958
20091-4	0.0840971	0.646232	0.269671
20098-4	0.260688	0.416856	0.322455
20099-4	0.164193	0.53709	0.298717
20100-4	0.00620633	0.635704	0.35809
20102-4	0.00048901	0.624921	0.37459
20103-4	0.109293	0.609327	0.28138
20104-4	0.146327	0.553271	0.300402
20105-4	0.0663526	0.667903	0.265744
20106-4	0.0203698	0.626873	0.352758
20107-4	0.181333	0.586721	0.231946
20110-4	0.0524341	0.681617	0.265949
20113-4	0.151084	0.597603	0.251314
20115-4	0.00843929	0.629336	0.362225
20116-4	0.172535	0.523154	0.304312
20119-4	0.1406	0.590419	0.26898
20120-4	0.0108665	0.697629	0.291504
20121-4	0.178722	0.588173	0.233105
20122-4	0.108471	0.61296	0.278568
20123-4	0.260393	0.419472	0.320135
20124-4	0.00707941	0.675094	0.317826
20126-4	0.0107522	0.584505	0.404742
20127-4	0.140008	0.606806	0.253185
20129-4	0.026124	0.682431	0.291445
20131-4	0.0235331	0.6214	0.355067
20132-4	0.0246662	0.615733	0.359601
20133-4	0.140185	0.605515	0.254301
20134-4	0.0365403	0.689809	0.273651
20135-4	0.0938862	0.656962	0.249151
20136-4	0.0272568	0.612323	0.36042
20140-4	0.0240146	0.702523	0.273462
20143-4	0.0440524	0.639462	0.316486
20144-4	0.266285	0.430378	0.303338
20145-4	0.180669	0.494234	0.325096
20146-4	0.0538469	0.640505	0.305648
20147-4	0.102629	0.628028	0.269343
20148-4	0.051017	0.635535	0.313448
20149-4	0.0366981	0.696508	0.266794
20150-4	0.13138	0.610957	0.257663
20153-4	0.174678	0.595	0.230322
20154-4	0.129267	0.606753	0.26398
20156-4	0.0240552	0.70352	0.272425
20157-4	0.0579437	0.678977	0.263079
20159-4	0.207209	0.539165	0.253626
20160-4	0.0861908	0.663734	0.250076
20163-4	0.0396764	0.64013	0.320194
20165-4	0.0223431	0.615018	0.362639
20167-4	0.188031	0.590866	0.221103
20169-4	0.114439	0.628775	0.256786
20170-4	0.0110697	0.603519	0.385411
20172-4	0.0475847	0.686521	0.265894
20173-4	0.275172	0.428865	0.295963
20174-4	0.17722	0.4954	0.327381
20176-4	0.0349062	0.622725	0.342369
20177-4	0.121407	0.612777	0.265816
20178-4	0.129656	0.599704	0.270641
20180-4	0.133601	0.605697	0.260702
20181-4	0.0215772	0.606491	0.371932
20183-4	0.0021147	0.620246	0.377639
20184-4	0.0416745	0.688054	0.270271
20185-4	0.0084487	0.62646	0.365091
20186-4	0.265444	0.466041	0.268514
20189-4	0.0771676	0.620661	0.302172
20190-4	0.1347	0.605707	0.259593
20191-4	0.271574	0.446386	0.282041
20194-4	0.128153	0.610939	0.260908
20195-4	0.105198	0.649326	0.245476
20196-4	0.09155	0.664212	0.244238
20198-4	0.173173	0.597143	0.229684
20199-4	0.179351	0.600928	0.219721
202-4	0.0295358	0.603363	0.367102
20200-4	0.0419804	0.620306	0.337713
20201-4	0.00192655	0.618726	0.379347
20202-4	0.0572387	0.680586	0.262175
20203-4	0.0163576	0.6962	0.287443
20204-4	0.281038	0.410012	0.30895
20206-4	0.0829587	0.667832	0.24921
20208-4	0.158601	0.607931	0.233468
20209-4	0.282431	0.425118	0.292451
20210-4	0.0603257	0.664127	0.275547
20214-4	0.0270228	0.630617	0.34236
20215-4	0.0322708	0.608809	0.35892
20216-4	0.120177	0.611978	0.267845
20217-4	0.133341	0.616281	0.250378
20219-4	0.0469077	0.657086	0.296006
20220-4	0.0738352	0.619699	0.306466
20221-4	0.287532	0.435909	0.276559
20222-4	0.126334	0.623732	0.249934
20224-4	0.0263771	0.613551	0.360072
20226-4	0.0494793	0.676065	0.274456
20229-4	0.046085	0.585292	0.368623
20231-4	0.0430027	0.631343	0.325654
20232-4	0.208453	0.516935	0.274612
20233-4	0.047134	0.653239	0.299627
20234-4	0.181036	0.603506	0.215458
20235-4	0.0397251	0.682445	0.27783
20237-4	0.0466292	0.642066	0.311305
20238-4	0.0582329	0.647227	0.29454
20240-4	0.141009	0.60099	0.258001
20241-4	0.0161119	0.710811	0.273077
20242-4	0.0879449	0.658367	0.253688
20243-4	0.0233462	0.691638	0.285015
20244-4	0.182165	0.559557	0.258278
20245-4	0.174325	0.575592	0.250082
20246-4	0.116554	0.605712	0.277734
20247-4	0.0620852	0.671004	0.266911
20249-4	0.0383007	0.615082	0.346618
20250-4	0.144078	0.617288	0.238634
20251-4	0.0189348	0.603412	0.377654
20253-4	0.129239	0.587555	0.283207
20254-4	0.0356033	0.608578	0.355818
20255-4	0.109091	0.624326	0.266583
20256-4	0.0319105	0.598409	0.369681
20257-4	0.0414326	0.589986	0.368581
20259-4	0.0192101	0.613816	0.366974
20261-4	0.12582	0.634641	0.239539
20265-4	0.0963604	0.638763	0.264876
20266-4	0.0948963	0.631925	0.273179
20267-4	0.29237	0.419342	0.288288
20268-4	0.0355157	0.598249	0.366236
20269-4	0.113835	0.645803	0.240362
20272-4	0.177655	0.559574	0.26277
20273-4	0.194179	0.544251	0.26157
20274-4	0.0379452	0.634163	0.327891
20275-4	0.139002	0.571762	0.289236
20276-4	0.275566	0.450745	0.273689
20277-4	0.0584588	0.671144	0.270397
20280-4	0.0444089	0.663264	0.292327
20282-4	0.227536	0.493765	0.278699
20283-4	0.164457	0.58986	0.245683
20285-4	0.0333298	0.600312	0.366358
20286-4	0.0973615	0.654974	0.247664
20288-4	0.0444229	0.676881	0.278696
20291-4	0.0385873	0.598116	0.363297
20292-4	0.0384271	0.648879	0.312694
20293-4	0.0247346	0.671999	0.303266
20294-4	0.0973564	0.643213	0.259431
20295-4	0.122856	0.599329	0.277815
20296-4	0.184169	0.522838	0.292992
20297-4	0.0581212	0.667696	0.274183
20299-4	0.0431803	0.663053	0.293767
203-4	0.0228745	0.629305	0.34782
20302-4	0.206919	0.491818	0.301263
20303-4	0.177254	0.577316	0.24543
20304-4	0.0352952	0.607978	0.356726
20305-4	0.0351521	0.638184	0.326664
20306-4	0.123061	0.635595	0.241344
20307-4	0.104651	0.637158	0.258191
20308-4	0.0653562	0.661675	0.272969
20309-4	0.288703	0.396438	0.314859
47939	0.0454191	0.229608	0.724973
20310-4	0.15446	0.604732	0.240808
20313-4	0.269227	0.457002	0.273771
20314-4	0.0988621	0.591675	0.309463
20315-4	0.110151	0.651211	0.238638
20316-4	0.0863553	0.611336	0.302308
20317-4	0.286126	0.432875	0.281
20318-4	0.0988812	0.647002	0.254117
20319-4	0.0227586	0.664169	0.313072
20320-4	0.0981747	0.635435	0.26639
20321-4	0.177431	0.573546	0.249023
20324-4	0.0280647	0.597982	0.373954
20325-4	0.0317528	0.649503	0.318744
20326-4	0.0543521	0.653391	0.292257
20327-4	0.168974	0.543579	0.287447
20328-4	0.0678052	0.666569	0.265626
20329-4	0.0327144	0.639169	0.328117
20330-4	0.0373707	0.655562	0.307067
20333-4	0.040841	0.591191	0.367968
20334-4	0.031256	0.595323	0.373421
20337-4	0.110773	0.637283	0.251943
20338-4	0.0834709	0.636219	0.28031
20339-4	0.180473	0.567351	0.252176
20340-4	0.0252542	0.624013	0.350733
20341-4	0.125767	0.637351	0.236883
20342-4	0.181875	0.569273	0.248852
20343-4	0.0731775	0.625512	0.30131
20344-4	0.0360078	0.626465	0.337527
20346-4	0.109313	0.642952	0.247735
20349-4	0.144902	0.509593	0.345506
20350-4	0.0429224	0.652857	0.304221
20351-4	0.0298594	0.592666	0.377474
20352-4	0.275426	0.394472	0.330102
20353-4	0.154872	0.567069	0.278059
20356-4	0.16132	0.558133	0.280548
20357-4	0.190276	0.523921	0.285802
20358-4	0.0423227	0.669352	0.288326
20359-4	0.0409719	0.664822	0.294207
20360-4	0.0231423	0.658875	0.317982
20362-4	0.145846	0.602021	0.252132
20364-4	0.101471	0.594737	0.303791
20368-4	0.0770285	0.642392	0.28058
20369-4	0.117177	0.644977	0.237846
50131	0.12036	0.265428	0.614212
20370-4	0.253509	0.413121	0.333371
20372-4	0.0359348	0.625581	0.338484
20373-4	0.215805	0.506593	0.277603
20374-4	0.0830547	0.6153	0.301646
20375-4	0.170801	0.538709	0.29049
20376-4	0.174247	0.533976	0.291776
20377-4	0.0999583	0.651131	0.248911
20378-4	0.0405871	0.671496	0.287917
50496	0.118822	0.234375	0.646803
20380-4	0.0659422	0.568263	0.365795
20381-4	0.0167693	0.631219	0.352012
20382-4	0.120742	0.63353	0.245728
20384-4	0.209601	0.506622	0.283777
20385-4	0.0466779	0.685888	0.267434
20387-4	0.0400322	0.579648	0.38032
20388-4	0.0269552	0.661226	0.311818
20389-4	0.221753	0.526907	0.25134
20390-4	0.0300456	0.673836	0.296118
20391-4	0.0251695	0.640539	0.334291
20392-4	0.0785415	0.649241	0.272217
20393-4	0.0801451	0.605739	0.314116
20395-4	0.0784536	0.638985	0.282561
20396-4	0.0832649	0.660945	0.255791
20398-4	0.0109074	0.653712	0.33538
20399-4	0.0805508	0.659975	0.259474
20400-4	0.119425	0.526724	0.353851
20402-4	0.028592	0.634971	0.336437
20403-4	0.0743133	0.607882	0.317805
20404-4	0.0345867	0.688863	0.27655
20405-4	0.103952	0.653089	0.242958
20406-4	0.104752	0.650952	0.244296
20407-4	0.240673	0.421867	0.33746
20408-4	0.142465	0.604386	0.253149
20413-4	0.242911	0.448066	0.309024
20414-4	0.0615905	0.668714	0.269695
20415-4	0.0191896	0.680316	0.300495
20416-4	0.0211529	0.674748	0.304099
20417-4	0.0307269	0.596487	0.372787
20419-4	0.231304	0.482493	0.286203
20421-4	0.0356902	0.64713	0.31718
20422-4	0.179957	0.526169	0.293874
20423-4	0.0452442	0.681018	0.273738
20425-4	0.107181	0.533331	0.359487
20426-4	0.0346282	0.631827	0.333545
20428-4	0.0710549	0.666178	0.262767
20429-4	0.0624936	0.66956	0.267946
20430-4	0.22631	0.440871	0.332819
20431-4	0.105128	0.637156	0.257716
20433-4	0.0270813	0.644287	0.328632
20435-4	0.0131669	0.656317	0.330516
20436-4	0.119751	0.617047	0.263202
20437-4	0.0544734	0.622733	0.322793
20438-4	0.0280826	0.602916	0.369002
20439-4	0.034361	0.627769	0.33787
20440-4	0.0793147	0.619394	0.301291
20442-4	0.235296	0.517452	0.247252
20443-4	0.0914547	0.640904	0.267641
20447-4	0.0590959	0.619176	0.321728
20449-4	0.168756	0.561017	0.270227
20450-4	0.0648408	0.650595	0.284564
20452-4	0.0555141	0.656214	0.288272
20453-4	0.00934599	0.692503	0.298151
20456-4	0.176102	0.520751	0.303147
20457-4	0.0316404	0.625787	0.342572
20459-4	0.00589637	0.655509	0.338594
20461-4	0.201058	0.453794	0.345148
20464-4	0.177936	0.503799	0.318265
20466-4	0.014884	0.642116	0.343
20467-4	0.236905	0.453213	0.309882
20468-4	0.208176	0.52809	0.263734
20469-4	0.0382155	0.626168	0.335616
20470-4	0.057116	0.6281	0.314784
20471-4	0.222151	0.437213	0.340636
20472-4	0.0330997	0.626048	0.340852
20473-4	0.132025	0.588874	0.279101
20474-4	0.0638769	0.606527	0.329596
20476-4	0.0481218	0.677041	0.274837
20477-4	0.211189	0.447251	0.34156
20478-4	0.0191186	0.641592	0.339289
20480-4	0.0199702	0.637419	0.342611
20481-4	0.0494475	0.627594	0.322958
20482-4	0.0888008	0.669891	0.241309
20485-4	0.188957	0.537521	0.273521
20486-4	0.0416425	0.598	0.360358
20487-4	0.0144218	0.633431	0.352147
20490-4	0.0264439	0.618751	0.354805
20491-4	0.0290889	0.624501	0.346411
20492-4	0.0641585	0.676143	0.259698
20494-4	0.189352	0.495075	0.315573
20495-4	0.20887	0.527452	0.263678
20497-4	0.067879	0.684596	0.247525
20498-4	0.206506	0.495981	0.297513
205-4	0.0203251	0.602489	0.377186
20500-4	0.083452	0.63452	0.282029
20501-4	0.0265566	0.624633	0.348811
20505-4	0.0202459	0.65215	0.327605
20506-4	0.0402914	0.638439	0.321269
20507-4	0.152401	0.545205	0.302394
20508-4	0.162744	0.493372	0.343884
20509-4	0.0299583	0.693311	0.276731
20510-4	0.0100806	0.684751	0.305169
20512-4	0.0328813	0.641069	0.326049
20513-4	0.00656838	0.691826	0.301606
20514-4	0.0331378	0.646722	0.320141
20515-4	0.0350231	0.635927	0.32905
20516-4	0.058948	0.676405	0.264647
20517-4	0.104539	0.590187	0.305273
20520-4	0.0517347	0.654413	0.293852
20521-4	0.0116288	0.680788	0.307584
20522-4	0.0670982	0.673847	0.259055
20524-4	0.0472948	0.600152	0.352553
20525-4	0.0321978	0.610011	0.357791
20526-4	0.0329952	0.634324	0.332681
20527-4	0.0569208	0.689279	0.2538
20528-4	0.0489744	0.679264	0.271762
20529-4	0.0400566	0.67178	0.288163
20530-4	0.0701655	0.591827	0.338008
20532-4	0.201661	0.486296	0.312043
20533-4	0.187318	0.550064	0.262618
20534-4	0.0256433	0.629092	0.345265
20535-4	0.0307123	0.626072	0.343215
20536-4	0.202872	0.472653	0.324476
20539-4	0.0132204	0.657638	0.329142
20540-4	0.0189553	0.650357	0.330688
20541-4	0.041768	0.629292	0.32894
20542-4	0.199684	0.508479	0.291837
20543-4	0.0634414	0.678586	0.257973
20544-4	0.0347156	0.630873	0.334412
20547-4	0.143347	0.514842	0.341811
20548-4	0.176029	0.53679	0.287181
20550-4	0.0509939	0.68911	0.259897
20552-4	0.0202455	0.629803	0.349952
20553-4	0.196846	0.439434	0.36372
20554-4	0.0314065	0.686405	0.282189
20557-4	0.0213302	0.622364	0.356306
20558-4	0.123045	0.517331	0.359624
20559-4	0.170724	0.546862	0.282414
20560-4	0.0813708	0.610441	0.308189
20561-4	0.0303709	0.678367	0.291262
20564-4	0.0214711	0.64808	0.330449
20565-4	0.0227865	0.645719	0.331494
20566-4	0.0579592	0.686802	0.255239
20567-4	0.111508	0.471922	0.41657
20568-4	0.0194915	0.63122	0.349288
20569-4	0.00510612	0.636036	0.358858
57436	0.0659718	0.179704	0.754324
20571-4	0.0208141	0.650324	0.328862
20572-4	0.112474	0.552264	0.335262
20574-4	4.22764e-05	0.686031	0.313926
20575-4	6.22613e-05	0.659297	0.340641
20576-4	0.0131566	0.65219	0.334653
20578-4	0.0263746	0.606057	0.367569
20580-4	0.00469727	0.656034	0.339268
20581-4	0.0232491	0.628888	0.347862
20582-4	0.177592	0.49665	0.325758
20584-4	0.064314	0.678401	0.257285
20585-4	0.0454873	0.682886	0.271627
20587-4	0.00901673	0.628764	0.362219
20588-4	0.0414863	0.646402	0.312112
20589-4	0.108738	0.516605	0.374658
20590-4	0.0350889	0.682173	0.282738
20593-4	0.027283	0.649732	0.322985
20594-4	5.40317e-05	0.630483	0.369463
20596-4	0.0251626	0.294269	0.680569
20597-4	0.160196	0.491763	0.348041
20598-4	0.0299555	0.632604	0.337441
20599-4	0.0943293	0.546306	0.359365
58532	0.0498821	0.20579	0.744328
20600-4	0.0146029	0.667726	0.317671
20601-4	0.0491201	0.685314	0.265566
20602-4	0.0169726	0.635027	0.348
20603-4	0.000201886	0.662154	0.337644
20604-4	0.038487	0.665384	0.296129
20605-4	0.0595357	0.586664	0.3538
20609-4	0.0360821	0.673772	0.290146
20610-4	0.0107024	0.682048	0.30725
20611-4	0.0171024	0.66997	0.312928
20612-4	0.0138298	0.641834	0.344337
20613-4	0.135582	0.496899	0.367519
20617-4	0.0167936	0.630911	0.352295
20619-4	0.00787972	0.644807	0.347313
20621-4	0.0206707	0.62991	0.349419
20624-4	0.0235628	0.634077	0.34236
20625-4	0.0413416	0.701781	0.256877
20626-4	0.061065	0.678076	0.260859
20627-4	0.0224669	0.649493	0.32804
20628-4	0.0397176	0.665369	0.294913
20629-4	0.0784336	0.553651	0.367915
20630-4	0.0851742	0.506972	0.407854
20632-4	0.00300095	0.635805	0.361194
20633-4	0.0427736	0.681913	0.275314
20635-4	0.0356226	0.677025	0.287353
20636-4	0.0999405	0.554474	0.345586
20637-4	0.118819	0.547108	0.334073
20638-4	0.0213189	0.640364	0.338317
20639-4	0.024261	0.634227	0.341512
20640-4	0.115295	0.485728	0.398977
20643-4	0.0196113	0.620257	0.360132
20644-4	0.0263385	0.645874	0.327788
20647-4	0.0112904	0.644943	0.343767
20649-4	0.112694	0.522385	0.364921
20650-4	0.000229086	0.691999	0.307772
20651-4	0.0512561	0.693907	0.254837
20652-4	0.118207	0.490294	0.3915
20653-4	0.0225531	0.652853	0.324594
20656-4	0.00368597	0.649396	0.346918
20657-4	0.0133552	0.682816	0.303828
20658-4	0.0508253	0.570262	0.378913
20659-4	0.0177188	0.646656	0.335626
20660-4	0.102743	0.496363	0.400894
20661-4	0.0976245	0.5586	0.343775
20664-4	0.0595209	0.562705	0.377774
20665-4	0.0297331	0.646178	0.324089
20666-4	0.0492409	0.553134	0.397625
20667-4	0.0176823	0.678392	0.303925
20669-4	0.0237597	0.645087	0.331153
20670-4	0.0266309	0.633656	0.339713
20671-4	0.0212777	0.637535	0.341188
20672-4	0.0168389	0.64513	0.338032
20673-4	0.0475158	0.711154	0.24133
20674-4	0.000142509	0.684556	0.315301
20675-4	0.0868558	0.535745	0.377399
20676-4	0.00872287	0.636032	0.355246
20678-4	0.0572298	0.573196	0.369574
20680-4	0.0387349	0.725222	0.236043
20681-4	0.0372662	0.666313	0.29642
20682-4	0.00425896	0.685234	0.310507
20683-4	0.0661226	0.50944	0.424437
20685-4	0.00926854	0.64002	0.350712
20686-4	0.0929735	0.519959	0.387067
20688-4	0.0572757	0.585057	0.357667
20689-4	0.0505912	0.590699	0.35871
20694-4	0.0446873	0.709107	0.246206
20695-4	0.0774537	0.499087	0.423459
20697-4	0.10219	0.533931	0.363879
20698-4	0.0106807	0.644608	0.344711
207-4	0.0110886	0.612293	0.376619
20701-4	0.0408876	0.701595	0.257517
20702-4	0.082644	0.503847	0.413509
20703-4	0.034964	0.636246	0.32879
20705-4	0.0392905	0.569074	0.391635
20707-4	0.0806482	0.531645	0.387707
20710-4	0.016102	0.664455	0.319443
20712-4	0.0317116	0.717094	0.251195
20713-4	0.0767187	0.521442	0.40184
20714-4	0.0459981	0.597793	0.356209
20717-4	0.0678075	0.567162	0.36503
20718-4	0.0510337	0.568313	0.380653
20720-4	0.0452959	0.65616	0.298544
20721-4	0.0474346	0.607579	0.344986
20722-4	0.000196002	0.640405	0.359399
20723-4	0.0499864	0.618673	0.331341
20724-4	0.0183502	0.661813	0.319837
20726-4	0.0340158	0.613891	0.352093
20729-4	0.0416036	0.701685	0.256711
20730-4	0.0427481	0.529496	0.427756
20732-4	0.0745803	0.587322	0.338098
20737-4	0.00369004	0.638375	0.357935
20739-4	0.0305223	0.709283	0.260195
20740-4	0.0172453	0.686805	0.295949
20742-4	0.0489661	0.57133	0.379704
20744-4	0.0132347	0.667747	0.319019
20747-4	0.0385065	0.705301	0.256193
20750-4	0.0411398	0.552257	0.406603
20751-4	0.00236371	0.64044	0.357196
20752-4	0.0318012	0.576211	0.391987
20753-4	0.0227035	0.651587	0.325709
20754-4	0.0469322	0.640263	0.312805
20755-4	0.0142828	0.662607	0.32311
20758-4	0.0312526	0.707212	0.261535
20759-4	0.0811772	0.57795	0.340873
20760-4	0.0462517	0.628543	0.325205
20761-4	0.0390367	0.652005	0.308958
20762-4	0.0586561	0.560304	0.38104
20763-4	0.0426416	0.60274	0.354618
20764-4	0.0495236	0.608924	0.341553
20765-4	0.0442647	0.639166	0.316569
20766-4	0.0311065	0.664281	0.304613
20767-4	0.0327083	0.674443	0.292849
20768-4	0.0369468	0.687969	0.275084
20769-4	0.0333233	0.607363	0.359314
20770-4	0.0277672	0.670097	0.302136
20771-4	0.0358796	0.618138	0.345983
20772-4	0.0289926	0.631559	0.339448
20775-4	0.0375688	0.698133	0.264298
20776-4	0.0275062	0.600471	0.372023
20777-4	0.0381888	0.64597	0.315841
20778-4	0.0305245	0.601211	0.368264
20779-4	0.0438522	0.631747	0.324401
20780-4	0.00188557	0.640379	0.357736
20782-4	0.0328371	0.624782	0.342381
20783-4	0.0223607	0.660226	0.317413
20784-4	0.0454163	0.62165	0.332933
20785-4	0.0204243	0.676631	0.302945
20786-4	0.0114453	0.662988	0.325566
20787-4	0.0226951	0.670579	0.306726
20788-4	0.0026059	0.680533	0.316861
20789-4	0.044345	0.652621	0.303034
20790-4	7.3365e-05	0.652903	0.347024
20792-4	0.0104789	0.635764	0.353757
20795-4	0.0523346	0.603474	0.344191
20796-4	0.0355466	0.592565	0.371889
20797-4	0.0172173	0.56365	0.419132
20798-4	0.0258464	0.592853	0.381301
20799-4	0.025001	0.605098	0.369901
20800-4	0.0411157	0.626241	0.332643
20801-4	0.0313631	0.628984	0.339653
20802-4	0.0264519	0.624978	0.34857
20804-4	0.0387811	0.681258	0.279961
20805-4	0.0468038	0.61528	0.337917
20806-4	0.0219338	0.630239	0.347827
20807-4	0.0225262	0.677146	0.300328
20808-4	0.0408977	0.63614	0.322962
20809-4	0.0366212	0.648958	0.314421
20810-4	0.0330035	0.616082	0.350914
20811-4	0.0220035	0.691619	0.286378
20812-4	0.0768854	0.539209	0.383905
20813-4	0.037354	0.66103	0.301616
20815-4	0.00981053	0.659424	0.330765
20817-4	0.0202454	0.678961	0.300793
20818-4	0.0315959	0.595542	0.372862
20819-4	0.0170932	0.615794	0.367112
20821-4	0.0187498	0.644593	0.336657
20822-4	0.04509	0.649093	0.305818
20824-4	0.0283865	0.592098	0.379516
20825-4	0.0695179	0.632787	0.297695
20826-4	0.0118075	0.705808	0.282384
20827-4	0.00240767	0.645143	0.35245
20828-4	0.0485951	0.584961	0.366444
20829-4	0.0336244	0.640652	0.325723
20830-4	0.0292913	0.639499	0.331209
20831-4	0.0286089	0.638796	0.332595
20832-4	0.0431504	0.581825	0.375025
20833-4	0.0404665	0.586153	0.373381
20834-4	0.0315343	0.656985	0.311481
20835-4	0.0402262	0.61804	0.341734
20836-4	0.0168336	0.588352	0.394815
20837-4	0.0649815	0.637663	0.297356
20838-4	0.0186317	0.672683	0.308685
20839-4	0.0218638	0.668029	0.310107
20840-4	0.0934081	0.597374	0.309218
20841-4	0.0606605	0.569929	0.369411
20842-4	0.0213233	0.59423	0.384447
20843-4	0.0394834	0.602645	0.357872
20844-4	0.00132621	0.598935	0.399739
20845-4	0.000648018	0.585993	0.413359
20846-4	0.0272284	0.610175	0.362597
20847-4	0.0279724	0.685108	0.286919
20848-4	0.0258003	0.633662	0.340538
20849-4	0.0253064	0.685809	0.288884
20850-4	0.0447107	0.608327	0.346963
20851-4	0.0227735	0.566455	0.410772
20852-4	0.011462	0.676829	0.311709
20854-4	0.0335633	0.627471	0.338965
20855-4	0.0247602	0.644553	0.330687
20857-4	0.0324021	0.594619	0.372979
20859-4	0.0496907	0.573485	0.376824
20861-4	0.0360453	0.594439	0.369516
20862-4	0.0435388	0.590818	0.365643
20863-4	0.0327694	0.693816	0.273415
20864-4	0.041518	0.652896	0.305586
20865-4	0.0402964	0.651852	0.307851
20866-4	0.0639697	0.638606	0.297424
20867-4	0.022999	0.630572	0.346429
20868-4	0.0216374	0.647905	0.330458
20869-4	0.0977757	0.599346	0.302878
20870-4	0.0190182	0.678513	0.302468
20871-4	0.0247168	0.665346	0.309938
20872-4	0.0380337	0.652948	0.309018
20873-4	0.0402062	0.651157	0.308637
20874-4	0.0410196	0.670225	0.288755
20875-4	0.0848822	0.620075	0.295042
20876-4	0.0911768	0.61477	0.294054
20877-4	0.028497	0.668178	0.303325
20878-4	0.0401652	0.651921	0.307914
20881-4	0.0250283	0.632573	0.342399
20882-4	0.0268386	0.587875	0.385286
20883-4	0.00574361	0.626801	0.367455
20884-4	0.0280503	0.623026	0.348924
20885-4	0.0228353	0.708902	0.268263
20886-4	0.0354953	0.66909	0.295415
20887-4	0.110244	0.587692	0.302065
20888-4	0.0317871	0.581198	0.387014
20889-4	0.0340841	0.66376	0.302156
20890-4	0.128405	0.57649	0.295106
20891-4	0.0550459	0.586546	0.358408
20892-4	0.0334976	0.583775	0.382727
20893-4	0.043271	0.576104	0.380625
20894-4	0.046354	0.586817	0.366829
20895-4	0.00441088	0.632556	0.363033
20896-4	0.0457691	0.661331	0.2929
20897-4	0.00563408	0.688944	0.305422
20898-4	0.03812	0.60371	0.35817
20899-4	0.0418515	0.599348	0.358801
209-4	0.0621928	0.487754	0.450053
20900-4	0.0194609	0.625422	0.355117
20901-4	0.00702721	0.702429	0.290543
20902-4	0.0233851	0.668881	0.307734
20903-4	0.0166624	0.677959	0.305378
20904-4	0.0331491	0.662631	0.30422
20905-4	0.0267356	0.598977	0.374287
20906-4	0.0389697	0.669108	0.291922
20907-4	0.0186307	0.66252	0.318849
20908-4	0.130626	0.580401	0.288973
20909-4	0.112634	0.59591	0.291456
20910-4	0.0191316	0.679053	0.301815
20911-4	0.0361761	0.661712	0.302112
20912-4	0.0178633	0.687411	0.294725
20913-4	0.0338947	0.607228	0.358877
20914-4	0.0435551	0.602998	0.353447
20915-4	0.0410595	0.662302	0.296639
20916-4	0.0230164	0.626026	0.350958
20917-4	0.0424711	0.5784	0.379129
20918-4	0.0300737	0.626022	0.343904
20920-4	0.0187224	0.695575	0.285703
20921-4	0.122526	0.572331	0.305142
20922-4	0.0188295	0.681637	0.299534
20923-4	0.0610324	0.65497	0.283998
20924-4	0.115268	0.588726	0.296006
20925-4	0.0345303	0.58831	0.37716
20926-4	0.0350179	0.599048	0.365934
20927-4	0.0179809	0.620881	0.361138
20928-4	0.0185317	0.674918	0.30655
20929-4	0.143439	0.571442	0.285119
20930-4	0.136962	0.570254	0.292784
20931-4	0.0360534	0.659372	0.304575
20932-4	0.014662	0.667895	0.317443
20933-4	0.0333767	0.665563	0.30106
20934-4	0.0353305	0.66014	0.304529
20935-4	0.0577111	0.653587	0.288702
20936-4	0.069568	0.651086	0.279346
20937-4	0.00193418	0.625845	0.372221
20938-4	0.0219299	0.685466	0.292604
20939-4	0.000857767	0.664498	0.334644
20940-4	9.52063e-05	0.71729	0.282615
20941-4	0.0142525	0.669438	0.316309
20942-4	0.0144129	0.674266	0.311321
20943-4	0.0312768	0.585542	0.383181
20944-4	0.0169964	0.694131	0.288873
20945-4	0.099648	0.635962	0.26439
20946-4	0.151334	0.564342	0.284324
20947-4	0.0320259	0.610246	0.357728
20948-4	0.114417	0.626266	0.259317
20949-4	0.02524	0.677557	0.297203
20951-4	0.0229297	0.627889	0.349182
20952-4	0.043339	0.663762	0.292899
20953-4	0.022259	0.678242	0.299499
20954-4	0.0112903	0.621976	0.366734
20955-4	0.0113317	0.674026	0.314642
20956-4	0.00556238	0.636965	0.357473
20957-4	0.00202147	0.69365	0.304329
20958-4	0.0327079	0.631119	0.336174
20959-4	0.0358147	0.672117	0.292068
20960-4	0.104959	0.606405	0.288637
20961-4	0.159588	0.565184	0.275228
20962-4	0.159793	0.562257	0.27795
20963-4	0.0394365	0.672478	0.288085
20964-4	0.0343528	0.635686	0.329962
20965-4	0.0290306	0.634795	0.336175
20966-4	0.00804175	0.637726	0.354232
20967-4	0.0156262	0.643819	0.340555
20968-4	0.0109408	0.696257	0.292802
20969-4	0.0792352	0.641729	0.279036
20970-4	0.121076	0.590641	0.288284
20972-4	0.0312343	0.679832	0.288933
20973-4	0.0775048	0.647253	0.275242
20974-4	0.0500287	0.656958	0.293013
20975-4	0.0155906	0.590843	0.393566
20976-4	0.0258892	0.675444	0.298667
20977-4	0.14958	0.609341	0.241079
20978-4	0.0516678	0.667267	0.281065
20979-4	0.191952	0.546844	0.261204
20980-4	0.0238738	0.614175	0.361952
20981-4	0.0112903	0.676667	0.312042
20982-4	0.151904	0.563641	0.284455
20983-4	0.0134291	0.602201	0.38437
20984-4	0.178785	0.550147	0.271068
20985-4	4.00038e-05	0.688852	0.311108
20986-4	0.0287343	0.672098	0.299168
20989-4	0.0149216	0.685324	0.299754
20992-4	0.0811155	0.635114	0.283771
20993-4	0.0185353	0.680268	0.301197
20994-4	0.0173646	0.673023	0.309612
20995-4	0.0448655	0.671042	0.284093
20996-4	0.17889	0.545432	0.275678
20997-4	0.0475942	0.657077	0.295328
20998-4	0.0759202	0.645516	0.278564
20999-4	0.0459761	0.663505	0.290518
45768	0.0253435	0.596695	0.377962
210-4	0.013636	0.581221	0.405143
21000-4	0.133564	0.622818	0.243618
21001-4	0.0189013	0.654383	0.326716
21002-4	0.000907607	0.69742	0.301672
21003-4	0.0845293	0.637475	0.277996
21004-4	0.116894	0.62859	0.254516
21005-4	0.034478	0.680418	0.285104
21006-4	0.1847	0.551175	0.264126
21007-4	0.018236	0.652339	0.329425
21010-4	0.000166639	0.688097	0.311737
21011-4	0.0305759	0.696099	0.273325
21012-4	0.1131	0.612006	0.274894
21014-4	0.0181724	0.643687	0.338141
21015-4	0.0620257	0.65195	0.286024
21016-4	0.0576879	0.672751	0.269561
21017-4	0.215836	0.531075	0.253089
21018-4	0.103256	0.635844	0.260901
21019-4	0.000244572	0.650089	0.349667
21020-4	0.214627	0.544644	0.240728
21021-4	0.146929	0.577779	0.275292
21023-4	0.000683895	0.698817	0.300499
21024-4	0.058517	0.654818	0.286665
21025-4	0.124301	0.602375	0.273324
21027-4	0.0408588	0.557029	0.402112
21028-4	0.0180182	0.646459	0.335523
21029-4	0.0811668	0.650452	0.268382
21030-4	0.0199785	0.65795	0.322071
21031-4	0.0429723	0.671832	0.285195
21032-4	0.0205754	0.68397	0.295455
21033-4	0.169348	0.552753	0.277899
21034-4	0.0507286	0.684072	0.265199
21035-4	0.0210141	0.616298	0.362688
21036-4	0.0120314	0.601496	0.386472
21037-4	0.017103	0.714567	0.26833
21038-4	0.192475	0.543486	0.264039
21039-4	0.0164589	0.715457	0.268085
21040-4	0.0260964	0.631125	0.342778
21041-4	0.0401977	0.671577	0.288225
21042-4	0.0185782	0.643402	0.33802
21043-4	0.0629192	0.64168	0.295401
21044-4	0.0243513	0.656995	0.318654
21046-4	0.0120813	0.636542	0.351377
21047-4	0.129278	0.615409	0.255313
21048-4	0.0133377	0.646339	0.340323
21050-4	0.0334075	0.676963	0.289629
21051-4	0.164262	0.586144	0.249594
21052-4	0.014848	0.61511	0.370042
21053-4	0.036958	0.695936	0.267106
21054-4	0.0177032	0.697954	0.284343
21055-4	0.0250362	0.685931	0.289033
21056-4	0.0592537	0.667402	0.273344
21057-4	0.0389904	0.679595	0.281415
21058-4	0.104084	0.628685	0.267231
21059-4	0.0176451	0.649643	0.332712
21060-4	0.168491	0.566981	0.264528
21062-4	0.235528	0.51737	0.247102
21063-4	0.0381651	0.694634	0.267201
21065-4	0.11133	0.62224	0.266429
21066-4	0.135217	0.620202	0.24458
21067-4	0.206006	0.551316	0.242678
21068-4	0.0203198	0.661344	0.318336
21069-4	0.075601	0.645006	0.279393
21070-4	0.0661442	0.645069	0.288787
21071-4	0.0571004	0.672181	0.270719
21073-4	0.0276315	0.682375	0.289994
21074-4	0.0217744	0.653101	0.325125
21075-4	0.0208578	0.683034	0.296108
21076-4	0.0162543	0.714403	0.269343
21077-4	0.248779	0.503075	0.248146
21078-4	0.0307354	0.599276	0.369989
21079-4	0.0355989	0.63826	0.326141
21080-4	0.00955	0.634046	0.356404
21081-4	0.00947352	0.621136	0.36939
21082-4	0.112483	0.616685	0.270832
21083-4	0.211203	0.529335	0.259461
21084-4	0.00903111	0.615251	0.375718
21085-4	0.129059	0.611593	0.259348
21086-4	0.00606755	0.661157	0.332776
21087-4	0.00897649	0.651342	0.339681
21088-4	0.00680701	0.681152	0.312041
21089-4	0.0294744	0.627603	0.342923
21090-4	0.0255984	0.698731	0.27567
21091-4	0.109871	0.620179	0.26995
21092-4	0.19451	0.547829	0.257661
21093-4	0.00797746	0.618626	0.373397
21095-4	0.0538443	0.672714	0.273442
21096-4	0.167462	0.583641	0.248897
21097-4	0.141648	0.597803	0.26055
21098-4	0.0326824	0.700349	0.266968
211-4	0.0177013	0.60625	0.376049
21103-4	0.092938	0.630098	0.276964
21104-4	0.0393721	0.695574	0.265054
21105-4	0.209979	0.522606	0.267415
21106-4	0.0180228	0.60915	0.372827
21107-4	0.0131245	0.630753	0.356123
21110-4	0.227847	0.515944	0.25621
21111-4	0.0157345	0.675693	0.308573
21112-4	0.0226885	0.697641	0.279671
21113-4	0.0284091	0.699204	0.272387
21114-4	0.0275478	0.693575	0.278877
21115-4	0.216084	0.524586	0.25933
21116-4	0.0974715	0.639408	0.263121
21117-4	0.0963323	0.629104	0.274564
21118-4	0.0293055	0.639736	0.330958
21119-4	0.00327138	0.661856	0.334872
21121-4	0.0589707	0.66861	0.27242
21122-4	0.087008	0.660451	0.252541
21123-4	0.0156636	0.620554	0.363783
21124-4	0.133103	0.59573	0.271167
21125-4	0.00222152	0.669753	0.328025
21126-4	0.0309671	0.687969	0.281064
21127-4	0.251766	0.504037	0.244198
21128-4	0.187872	0.566612	0.245516
21129-4	0.130328	0.626533	0.243139
21130-4	0.000219866	0.625491	0.37429
21132-4	0.000792405	0.687201	0.312006
21133-4	0.0267037	0.705091	0.268206
21134-4	0.0277611	0.620854	0.351385
21135-4	0.194868	0.560652	0.24448
21137-4	0.106548	0.622634	0.270818
21139-4	0.0363158	0.688701	0.274983
21140-4	0.00418576	0.645885	0.34993
21141-4	0.0286904	0.690548	0.280761
21142-4	0.0992131	0.634548	0.266239
21143-4	0.0534027	0.673257	0.27334
21144-4	0.00603634	0.652583	0.341381
21146-4	0.0778874	0.650939	0.271174
21147-4	0.241398	0.50997	0.248632
21148-4	0.106604	0.610743	0.282653
21150-4	0.170896	0.586089	0.243015
21152-4	0.0356254	0.69385	0.270525
21153-4	0.208264	0.532898	0.258838
21154-4	0.203936	0.548063	0.248
21155-4	0.0159037	0.636142	0.347954
21156-4	0.0158452	0.643864	0.340291
21157-4	0.0100456	0.690689	0.299266
21158-4	0.0193647	0.63213	0.348505
21159-4	0.15722	0.581795	0.260985
21160-4	0.168053	0.574134	0.257813
21161-4	0.0536039	0.685841	0.260555
21164-4	0.0230519	0.697104	0.279844
21165-4	0.113784	0.618161	0.268055
21166-4	0.171026	0.574458	0.254516
21167-4	0.231889	0.521927	0.246184
21168-4	0.0326032	0.706181	0.261215
21169-4	0.0306137	0.617513	0.351874
21170-4	0.00133102	0.644185	0.354484
21171-4	0.0194521	0.622717	0.357831
21173-4	0.230805	0.524256	0.244939
21174-4	0.0191838	0.634048	0.346768
21175-4	0.215056	0.530253	0.254691
21178-4	0.0336524	0.697467	0.268881
21179-4	0.0257789	0.628051	0.34617
21180-4	0.0158703	0.634248	0.349881
21181-4	0.0675363	0.682136	0.250327
21182-4	0.0339844	0.687755	0.27826
21183-4	0.0265731	0.698492	0.274934
21184-4	0.133456	0.602339	0.264205
21185-4	0.000158613	0.627882	0.371959
21186-4	0.222243	0.511961	0.265796
21188-4	0.017028	0.628531	0.354441
21189-4	0.0346077	0.703077	0.262316
21190-4	0.0345297	0.693314	0.272157
21191-4	0.022016	0.622412	0.355572
21192-4	0.117916	0.615475	0.266609
21193-4	0.0332428	0.66593	0.300827
21194-4	0.0451636	0.696485	0.258351
21195-4	0.00634622	0.645487	0.348167
21196-4	0.0158978	0.606362	0.37774
21197-4	0.0192055	0.686051	0.294744
21198-4	0.0587762	0.677411	0.263813
21199-4	0.0993278	0.622068	0.278604
212-4	0.0345424	0.622154	0.343303
21200-4	0.138865	0.621123	0.240012
21201-4	0.134527	0.635181	0.230292
21202-4	0.037636	0.602861	0.359503
21203-4	0.0520957	0.687133	0.260771
21204-4	0.208286	0.532516	0.259198
21205-4	0.229901	0.517296	0.252803
21206-4	0.173531	0.582088	0.244381
21208-4	0.125617	0.618261	0.256122
21210-4	0.155297	0.581952	0.26275
21211-4	0.0895875	0.640697	0.269716
21212-4	0.00146649	0.638124	0.36041
21214-4	0.222587	0.514135	0.263278
21215-4	0.0260174	0.630591	0.343391
21216-4	0.192602	0.563024	0.244374
21217-4	0.00601508	0.628153	0.365831
21218-4	0.00180367	0.627893	0.370303
21219-4	0.00259611	0.637743	0.359661
21220-4	0.157592	0.589875	0.252532
21221-4	0.00696533	0.627091	0.365943
21222-4	0.036979	0.688423	0.274598
21223-4	0.028814	0.68806	0.283127
21224-4	0.042114	0.694683	0.263203
21225-4	0.224863	0.514183	0.260954
21226-4	0.0234065	0.613986	0.362607
21228-4	0.0771968	0.659736	0.263067
21229-4	0.189894	0.559841	0.250265
21230-4	0.232168	0.515193	0.25264
21232-4	0.170043	0.573776	0.256181
21234-4	0.0491739	0.688235	0.262591
21235-4	0.215772	0.543828	0.2404
21236-4	0.028143	0.618858	0.352998
21239-4	0.0323164	0.596422	0.371262
21240-4	0.0262448	0.60092	0.372835
21241-4	0.0379467	0.711713	0.25034
21243-4	0.223869	0.514391	0.261739
21244-4	0.0580978	0.694086	0.247816
21246-4	0.0329711	0.702073	0.264956
21247-4	0.238181	0.511252	0.250567
21248-4	0.00640598	0.642788	0.350806
21250-4	0.0350046	0.700351	0.264644
21251-4	0.135141	0.609549	0.255309
21253-4	0.0247075	0.642604	0.332688
21254-4	0.224414	0.517067	0.258519
21255-4	0.212836	0.540758	0.246406
21257-4	0.0485169	0.711705	0.239778
21258-4	0.0535269	0.577884	0.368589
21259-4	0.0287	0.59676	0.37454
21260-4	0.0145756	0.617861	0.367564
21261-4	0.022251	0.708797	0.268952
21262-4	0.0233077	0.60048	0.376212
21263-4	0.116692	0.631673	0.251635
21264-4	0.0217655	0.618399	0.359835
21267-4	0.0415901	0.695484	0.262926
21268-4	0.0665622	0.678691	0.254747
21269-4	0.134832	0.63689	0.228278
21270-4	0.221029	0.536722	0.24225
21272-4	0.0309009	0.699341	0.269758
21273-4	0.142434	0.599749	0.257817
21274-4	0.189709	0.567514	0.242777
21275-4	0.205454	0.546923	0.247623
21276-4	0.1603	0.604026	0.235673
21278-4	0.231861	0.51963	0.248509
21279-4	0.196149	0.567976	0.235875
21280-4	0.0234407	0.712801	0.263758
21281-4	0.0348356	0.689683	0.275482
21282-4	0.0435612	0.699873	0.256566
21283-4	0.241466	0.506611	0.251923
21284-4	0.189227	0.582379	0.228394
21285-4	0.0503227	0.711639	0.238038
21286-4	0.0158537	0.602209	0.381937
21287-4	0.234481	0.505172	0.260347
21288-4	0.22551	0.528715	0.245776
21291-4	0.224987	0.529029	0.245984
21292-4	0.232127	0.513846	0.254027
21293-4	0.104356	0.66644	0.229204
21295-4	0.113479	0.656517	0.230003
21296-4	0.214115	0.539664	0.24622
21298-4	0.0537024	0.58367	0.362628
213-4	0.0400785	0.630318	0.329603
21300-4	0.226311	0.526699	0.24699
21302-4	0.0533225	0.705483	0.241195
21303-4	0.0280793	0.709663	0.262258
21304-4	0.232523	0.50458	0.262896
21305-4	0.0359266	0.564872	0.399201
21306-4	0.0385803	0.569861	0.391559
21307-4	0.00114236	0.634703	0.364155
21308-4	0.172431	0.585395	0.242174
21309-4	0.140577	0.631407	0.228016
21311-4	0.159931	0.594359	0.24571
21314-4	0.139443	0.606365	0.254192
21315-4	0.207458	0.560741	0.231801
21316-4	0.0366772	0.56554	0.397783
21318-4	0.0289472	0.706525	0.264528
21319-4	0.0908526	0.64595	0.263197
21320-4	0.0785949	0.680372	0.241033
21321-4	0.0845256	0.653974	0.2615
21322-4	0.0400813	0.58524	0.374679
21324-4	0.233506	0.50796	0.258534
21325-4	0.0892073	0.679541	0.231251
21326-4	0.0453507	0.716417	0.238233
21328-4	0.114336	0.615415	0.270248
21330-4	0.0949173	0.639177	0.265906
21333-4	0.0134387	0.612155	0.374407
21335-4	0.235355	0.499593	0.265052
21336-4	0.0641234	0.70289	0.232987
21338-4	0.0459131	0.586233	0.367854
21339-4	0.0598128	0.668528	0.271659
21343-4	0.039943	0.706665	0.253392
21344-4	0.205301	0.564217	0.230482
21346-4	0.0734067	0.659096	0.267497
21348-4	0.0230132	0.713518	0.263469
21350-4	0.213706	0.549188	0.237106
21351-4	0.0365023	0.715124	0.248374
21352-4	0.229673	0.515691	0.254636
21353-4	0.125047	0.650691	0.224261
21354-4	0.0273034	0.718087	0.254609
21355-4	0.113811	0.651866	0.234323
21356-4	0.0999664	0.664512	0.235521
21359-4	0.234637	0.512073	0.25329
21360-4	0.000118683	0.644313	0.355569
21361-4	0.232034	0.531375	0.236591
21362-4	0.0262424	0.606345	0.367413
21364-4	0.21444	0.534458	0.251102
21365-4	0.218778	0.508577	0.272645
21366-4	0.0156931	0.629035	0.355272
21368-4	0.171012	0.593931	0.235058
21369-4	0.137243	0.615395	0.247362
86655	0.0226278	0.160521	0.816851
21370-4	0.189823	0.575131	0.235045
21371-4	0.143859	0.647504	0.208638
21372-4	0.0636454	0.561549	0.374805
21373-4	0.228415	0.499833	0.271753
21374-4	0.0486892	0.712872	0.238439
21375-4	0.0446614	0.694075	0.261264
21376-4	0.0441884	0.712431	0.243381
21377-4	0.0296382	0.597764	0.372598
21378-4	0.0206907	0.632968	0.346341
21379-4	0.22956	0.494	0.27644
21380-4	0.0837606	0.509125	0.407114
21381-4	0.0110994	0.606163	0.382737
21382-4	0.0838484	0.47578	0.440371
21383-4	0.0865491	0.640195	0.273256
21384-4	0.207642	0.55349	0.238868
21385-4	0.213665	0.51242	0.273915
21386-4	0.108319	0.667521	0.22416
21388-4	0.110814	0.626285	0.2629
21391-4	0.096554	0.500644	0.402802
21394-4	0.191413	0.576595	0.231992
21396-4	0.0910484	0.666204	0.242748
21397-4	0.110692	0.667663	0.221645
21399-4	0.0606018	0.679032	0.260366
21400-4	0.169437	0.598777	0.231786
21401-4	0.236411	0.512053	0.251537
21402-4	0.0133691	0.619363	0.367268
21403-4	0.0201919	0.629521	0.350287
21404-4	0.0585146	0.714063	0.227422
21405-4	0.218014	0.517698	0.264288
21407-4	0.102636	0.630729	0.266634
21408-4	0.224391	0.509886	0.265723
21409-4	0.214199	0.545896	0.239905
21410-4	0.0925626	0.507616	0.399821
21411-4	0.0196691	0.635325	0.345006
21414-4	0.050318	0.677897	0.271785
21415-4	0.145089	0.612498	0.242412
21416-4	0.234396	0.508958	0.256647
21417-4	0.228491	0.535122	0.236387
21418-4	0.0165387	0.63826	0.345201
21419-4	0.0382709	0.565305	0.396424
21420-4	0.207262	0.51565	0.277089
21421-4	0.0223695	0.615202	0.362428
21422-4	0.214097	0.561783	0.22412
21424-4	0.047073	0.681721	0.271206
21425-4	0.0660108	0.663282	0.270707
21427-4	0.0586525	0.676654	0.264694
21428-4	0.178272	0.581422	0.240306
21430-4	0.138162	0.614955	0.246883
21431-4	0.022733	0.635206	0.342061
21435-4	0.0992856	0.686231	0.214483
21436-4	0.0529607	0.699621	0.247418
21437-4	0.219501	0.538914	0.241585
21438-4	0.0204469	0.629899	0.349655
21440-4	0.189336	0.570847	0.239817
21441-4	0.216555	0.540627	0.242818
21442-4	0.247024	0.505227	0.247749
21444-4	0.114427	0.627595	0.257978
21445-4	0.0763063	0.689462	0.234232
21446-4	0.0731891	0.542736	0.384074
21449-4	0.00122956	0.652693	0.346078
21451-4	0.246258	0.506444	0.247298
[truncated: 37,424 more rows]

## Sheet: S18
Supplementary Table S18: Estimations of gene module activities of fibroblasts in the LUAD dataset
Fibroblasts	Fibroblast Module1	Fibroblast Module2	Fibroblast Module3
10016-4	0.124262	0.701276	0.174461
1002-4	0.124401	0.639896	0.235704
10041-4	0.0687615	0.694351	0.236887
10047-4	0.127201	0.72159	0.151209
10049-4	0.103473	0.644323	0.252204
10051-4	0.164724	0.594432	0.240844
10057-4	0.124505	0.681148	0.194347
10060-4	0.105167	0.654306	0.240527
10061-4	0.116796	0.719791	0.163413
10062-4	0.0811349	0.742865	0.176001
10069-4	0.201094	0.582839	0.216067
1007-4	0.10649	0.620294	0.273217
10073-4	0.117474	0.687892	0.194633
10094-4	0.0724831	0.744056	0.183461
10096-4	0.100856	0.723387	0.175757
10098-4	0.131052	0.689805	0.179143
10100-4	0.0988513	0.74683	0.154319
10106-4	0.115496	0.677698	0.206806
10109-4	0.141332	0.621533	0.237135
10111-4	0.12764	0.674933	0.197428
10117-4	0.146222	0.67402	0.179758
10152-4	0.0765962	0.771543	0.151861
10168-4	0.145946	0.679166	0.174888
10175-4	0.113838	0.691364	0.194798
10179-4	0.127001	0.676671	0.196328
10202-4	0.205084	0.576192	0.218724
10206-4	0.134172	0.658164	0.207664
10209-4	0.146099	0.676432	0.177469
10214-4	0.155156	0.687719	0.157125
1022-4	0.160028	0.494183	0.345788
10229-4	0.117262	0.626456	0.256282
10232-4	0.0989133	0.747247	0.15384
10234-4	0.110729	0.717078	0.172193
10235-4	0.11312	0.660556	0.226323
10237-4	0.151938	0.680629	0.167433
10241-4	0.131627	0.729948	0.138424
10244-4	0.0570865	0.772304	0.170609
10248-4	0.0983136	0.67703	0.224657
10251-4	0.0959646	0.674651	0.229384
10258-4	0.111469	0.644737	0.243794
1026-4	0.163946	0.498551	0.337502
10260-4	0.124199	0.677333	0.198468
10272-4	0.0986552	0.75176	0.149585
10277-4	0.130048	0.690103	0.179849
10278-4	0.0938367	0.695296	0.210867
1028-4	0.17328	0.484731	0.341989
10286-4	0.116252	0.632813	0.250935
10290-4	0.108115	0.665396	0.226489
10291-4	0.112169	0.626766	0.261065
10295-4	0.0712907	0.770694	0.158016
10300-4	0.108255	0.664168	0.227577
1031-4	0.161888	0.496753	0.341358
10313-4	0.109481	0.635604	0.254914
10319-4	0.188172	0.632067	0.179761
1032-4	0.169408	0.486447	0.344145
10320-4	0.106617	0.644886	0.248497
10323-4	0.0887354	0.772339	0.138926
10324-4	0.132495	0.679716	0.187789
10328-4	0.0954655	0.69241	0.212124
10343-4	0.121859	0.633896	0.244246
10354-4	0.141923	0.648822	0.209255
10355-4	0.1063	0.675532	0.218168
10356-4	0.103582	0.659647	0.236771
10374-4	0.0870265	0.699067	0.213907
10392-4	0.0871855	0.687106	0.225708
10399-4	0.0796993	0.724744	0.195557
1040-4	0.131533	0.639839	0.228628
10401-4	0.0878463	0.696172	0.215981
10402-4	0.0866984	0.770472	0.142829
10405-4	0.0836199	0.700171	0.21621
10424-4	0.121906	0.655728	0.222366
10434-4	0.0759862	0.701421	0.222592
10437-4	0.147465	0.66599	0.186544
1044-4	0.141221	0.596974	0.261804
10443-4	0.0861681	0.775398	0.138434
10448-4	0.0553044	0.791772	0.152923
10450-4	0.0866291	0.689847	0.223524
10452-4	0.0949836	0.75238	0.152636
10464-4	0.180837	0.660978	0.158185
10469-4	0.133494	0.69307	0.173437
10472-4	0.0658842	0.720562	0.213553
10477-4	0.0849478	0.691362	0.22369
10487-4	0.153252	0.654146	0.192602
10496-4	0.0829339	0.783865	0.133201
10508-4	0.0656059	0.787714	0.14668
10509-4	0.159967	0.621145	0.218888
1051-4	0.134534	0.559206	0.30626
10517-4	0.116483	0.727821	0.155696
10518-4	0.0881182	0.741506	0.170376
10527-4	0.152859	0.653385	0.193756
10529-4	0.105195	0.762702	0.132103
1053-4	0.180062	0.478176	0.341762
10530-4	0.099696	0.722918	0.177386
10543-4	0.027393	0.782242	0.190365
1055-4	0.129056	0.670063	0.200881
10554-4	0.123012	0.740239	0.136749
10568-4	0.14624	0.655555	0.198205
10575-4	0.0957758	0.747106	0.157118
1058-4	0.132894	0.645642	0.221464
10583-4	0.0773522	0.721443	0.201205
10588-4	0.0855727	0.750844	0.163583
10609-4	0.100094	0.717031	0.182875
10621-4	0.156609	0.658135	0.185256
10626-4	0.192244	0.662662	0.145094
10631-4	0.148527	0.666007	0.185466
10633-4	0.04795	0.802444	0.149606
10643-4	0.168881	0.672985	0.158133
10646-4	0.179812	0.647171	0.173017
10653-4	0.0635697	0.802672	0.133759
10667-4	0.142387	0.67171	0.185903
1067-4	0.163427	0.518965	0.317608
10676-4	0.099533	0.780508	0.119959
10684-4	0.111622	0.638794	0.249584
10688-4	0.103913	0.697442	0.198646
10695-4	0.0631354	0.787703	0.149162
10712-4	0.14815	0.688478	0.163371
10719-4	0.0619854	0.790642	0.147372
10720-4	0.0737717	0.801687	0.124542
10722-4	0.0855785	0.717159	0.197263
10739-4	0.0765517	0.804737	0.118711
10758-4	0.0819251	0.737663	0.180412
1076-4	0.167022	0.49245	0.340528
10766-4	0.077829	0.733589	0.188582
1077-4	0.171053	0.489663	0.339284
10794-4	0.114145	0.763554	0.1223
108-4	0.183011	0.292526	0.524463
1080-4	0.12736	0.647875	0.224765
10801-4	0.082259	0.793167	0.124574
10804-4	0.100311	0.705681	0.194008
10807-4	0.0575283	0.818817	0.123654
10808-4	0.112104	0.745537	0.142359
10824-4	0.157171	0.670749	0.172079
10828-4	0.0445976	0.826448	0.128954
10839-4	0.0325953	0.706396	0.261009
10853-4	0.132074	0.753558	0.114368
1086-4	0.169795	0.481991	0.348214
10863-4	0.0743441	0.75986	0.165796
10864-4	0.0288491	0.702642	0.268509
10865-4	0.0969668	0.751418	0.151615
1087-4	0.165637	0.485375	0.348988
10871-4	0.140003	0.711067	0.14893
10882-4	0.0943736	0.724111	0.181515
109-4	0.116811	0.369227	0.513961
10909-4	0.056965	0.838912	0.104123
10919-4	0.073589	0.80409	0.122321
1093-4	0.165239	0.504111	0.33065
10930-4	0.040967	0.712456	0.246577
10974-4	0.113706	0.738249	0.148046
1099-4	0.114229	0.655753	0.230019
10990-4	0.103363	0.802557	0.0940808
10991-4	0.0990079	0.762341	0.138651
11005-4	0.111801	0.815754	0.0724447
11009-4	0.056368	0.782971	0.160661
1101-4	0.145465	0.620008	0.234528
11021-4	0.0905264	0.777666	0.131807
11022-4	0.0676587	0.766824	0.165517
11032-4	0.123439	0.767887	0.108674
11051-4	0.0961261	0.830041	0.0738325
11059-4	0.104907	0.79382	0.101273
11064-4	0.0514894	0.777461	0.17105
11075-4	0.142083	0.707774	0.150143
1108-4	0.100392	0.619381	0.280227
1109-4	0.111746	0.663409	0.224845
11090-4	0.095071	0.80431	0.100619
11100-4	0.0791619	0.847111	0.0737267
11110-4	0.144075	0.724422	0.131502
11115-4	0.0862671	0.822893	0.0908399
1113-4	0.17061	0.478581	0.350809
11142-4	0.100018	0.779551	0.120431
1115-4	0.134499	0.652717	0.212784
1117-4	0.120332	0.618316	0.261352
11177-4	0.0870271	0.818401	0.0945721
11183-4	0.0296494	0.793977	0.176374
11185-4	0.0875025	0.801401	0.111097
11187-4	0.0755822	0.76388	0.160538
1119-4	0.171075	0.473589	0.355335
11213-4	0.0746556	0.794306	0.131039
11215-4	0.0916471	0.765041	0.143312
11218-4	0.0895379	0.796497	0.113965
11233-4	0.0893827	0.776987	0.13363
11236-4	0.125603	0.730749	0.143647
1125-4	0.11028	0.668821	0.220899
11252-4	0.107368	0.75858	0.134052
1129-4	0.142457	0.66261	0.194933
11295-4	0.0905842	0.815843	0.0935731
11297-4	0.0986118	0.765998	0.13539
1130-4	0.154379	0.523412	0.322209
1131-4	0.176705	0.481702	0.341593
11313-4	0.0982311	0.791122	0.110647
11325-4	0.0769526	0.7698	0.153248
1134-4	0.161716	0.484422	0.353861
11349-4	0.115166	0.824805	0.060029
11367-4	0.0591327	0.776558	0.16431
11379-4	0.112452	0.870215	0.017333
11395-4	0.102667	0.737312	0.160021
1140-4	0.159037	0.521551	0.319412
1141-4	0.180451	0.515942	0.303607
1145-4	0.172785	0.476521	0.350694
11457-4	0.124105	0.762843	0.113052
11458-4	0.0842731	0.74665	0.169077
1146-4	0.145053	0.598879	0.256068
11461-4	0.136796	0.796609	0.0665955
11483-4	0.042638	0.829177	0.128185
1153-4	0.167178	0.503051	0.329771
11538-4	0.402506	0.555006	0.0424876
1154-4	0.141461	0.652873	0.205666
11542-4	0.0219468	0.837073	0.14098
1155-4	0.0947991	0.668758	0.236442
11563-4	0.022633	0.823202	0.154165
11576-4	0.0762392	0.778633	0.145128
1158-4	0.139611	0.582459	0.27793
1160-4	0.193521	0.513251	0.293227
11605-4	0.136831	0.857208	0.00596058
11636-4	0.131408	0.730627	0.137966
1167-4	0.137205	0.66852	0.194274
117-4	0.136119	0.373963	0.489918
1170-4	0.191918	0.46327	0.344812
11704-4	0.0941364	0.845759	0.0601046
11713-4	0.045569	0.94034	0.0140913
1172-4	0.158709	0.63479	0.206501
11757-4	0.0334953	0.859774	0.10673
11769-4	0.247797	0.71471	0.0374935
1177-4	0.149644	0.652705	0.19765
11771-4	0.0997409	0.817461	0.0827977
1180-4	0.179544	0.467499	0.352958
11802-4	0.000795099	0.974147	0.0250584
11809-4	0.0666744	0.814256	0.11907
1185-4	0.0994775	0.618577	0.281945
11876-4	0.0587537	0.791792	0.149455
11886-4	0.064063	0.86723	0.0687071
1189-4	0.138017	0.596689	0.265293
119-4	0.253058	0.183254	0.563688
1190-4	0.166344	0.466522	0.367134
1191-4	0.145976	0.536939	0.317085
11925-4	0.04167	0.798022	0.160308
11931-4	0.0551814	0.788581	0.156238
11936-4	0.0550443	0.78107	0.163885
11941-4	0.0785639	0.823168	0.0982685
11953-4	0.0617283	0.936805	0.00146645
1196-4	0.161897	0.638175	0.199928
11971-4	0.0544005	0.848246	0.0973536
12034-4	0.0722444	0.852882	0.0748737
1204-4	0.214081	0.459222	0.326698
12042-4	0.0839331	0.750342	0.165725
1205-4	0.206098	0.464407	0.329495
12051-4	0.0503878	0.881232	0.0683798
12067-4	0.0282299	0.794119	0.177651
12087-4	0.0959114	0.772621	0.131468
12093-4	0.0888886	0.897081	0.0140303
12117-4	0.0708845	0.749236	0.179879
1216-4	0.133939	0.663862	0.202199
12168-4	0.0951218	0.807539	0.0973396
1217-4	0.134805	0.577753	0.287442
12171-4	0.0844663	0.768591	0.146943
12185-4	0.0898997	0.795396	0.114704
12195-4	0.0644429	0.754412	0.181145
1222-4	0.137377	0.588331	0.274292
12253-4	0.0585791	0.811548	0.129873
12264-4	0.0952244	0.840872	0.0639034
12268-4	0.0584259	0.817807	0.123767
1227-4	0.211027	0.454802	0.334171
12295-4	0.117166	0.825121	0.0577132
1230-4	0.134618	0.607246	0.258136
12318-4	0.0960003	0.816956	0.0870433
1232-4	0.133189	0.754302	0.112509
12323-4	0.0556051	0.845415	0.0989802
12333-4	0.171038	0.800345	0.0286171
1234-4	0.220082	0.449911	0.330007
12358-4	0.134484	0.819904	0.0456117
1237-4	0.147898	0.584341	0.267761
1239-4	0.0552013	0.72057	0.224228
12441-4	0.178251	0.79854	0.0232098
12448-4	0.073183	0.816056	0.110761
1249-4	0.132847	0.591758	0.275396
12501-4	0.14234	0.809301	0.048359
12509-4	0.0777657	0.844785	0.0774496
12517-4	0.159268	0.777178	0.0635545
12538-4	0.0701311	0.786287	0.143582
1254-4	0.148736	0.732317	0.118947
12545-4	0.138737	0.810748	0.0505154
12578-4	0.0797732	0.830453	0.0897743
1258-4	0.132533	0.596672	0.270795
1259-4	0.132717	0.600602	0.266681
12591-4	0.0757381	0.856663	0.0675985
12606-4	0.105786	0.771267	0.122947
12617-4	0.0623549	0.871714	0.0659311
12627-4	0.0788318	0.829694	0.0914741
1263-4	0.108537	0.606477	0.284986
12671-4	0.18412	0.777663	0.0382167
12688-4	0.0934732	0.904055	0.00247192
127-4	0.362315	0.457886	0.179799
12743-4	0.0829397	0.815191	0.101869
12760-4	0.0804625	0.917283	0.00225471
12776-4	0.0443878	0.900466	0.0551467
1278-4	0.218245	0.461265	0.32049
12795-4	0.0866612	0.823441	0.0898982
1280-4	0.133514	0.610274	0.256212
12804-4	0.0911951	0.838054	0.0707509
1281-4	0.14099	0.593361	0.265649
12841-4	0.0906837	0.830534	0.0787822
12866-4	0.0391475	0.907454	0.0533986
1289-4	0.132109	0.586411	0.28148
129-4	0.120865	0.377919	0.501217
1290-4	0.143537	0.58112	0.275343
1292-4	0.12801	0.668568	0.203421
12945-4	0.0269607	0.787579	0.18546
12982-4	0.0569743	0.845895	0.0971306
1301-4	0.150997	0.651253	0.197749
13016-4	0.0685648	0.779923	0.151512
13026-4	0.0542264	0.850313	0.0954605
13041-4	0.00184741	0.943279	0.0548741
13051-4	0.0774916	0.827334	0.0951749
1307-4	0.126775	0.604889	0.268336
13092-4	0.0298765	0.969881	0.000242436
1311-4	0.0793857	0.632905	0.28771
1312-4	0.124893	0.596768	0.278339
13145-4	0.0777774	0.833163	0.08906
13155-4	0.0637294	0.821238	0.115032
13185-4	0.0680614	0.829838	0.102101
13198-4	0.0953946	0.832041	0.0725639
13226-4	0.102275	0.843251	0.0544739
1323-4	0.136451	0.581849	0.2817
13248-4	0.0681933	0.879845	0.0519618
1330-4	0.129587	0.593182	0.277231
1332-4	0.12658	0.608222	0.265198
13327-4	0.0499705	0.947552	0.00247757
13387-4	0.0791311	0.721361	0.199508
1341-4	0.128923	0.656372	0.214705
13432-4	0.0898364	0.877801	0.0323626
13439-4	0.0906396	0.869616	0.0397447
1348-4	0.089781	0.639507	0.270712
13480-4	0.133564	0.772077	0.0943589
1349-4	0.141641	0.586465	0.271894
13647-4	0.0298417	0.969535	0.000623548
13652-4	0.12521	0.825838	0.0489524
137-4	0.147948	0.357378	0.494674
1371-4	0.146812	0.656599	0.196588
13727-4	0.152097	0.726929	0.120974
13730-4	0.0858142	0.638366	0.275819
13737-4	0.13762	0.615639	0.246741
13739-4	0.0134096	0.7333	0.25329
1374-4	0.15328	0.661901	0.184819
13741-4	0.121824	0.678082	0.200094
13751-4	0.126781	0.704919	0.1683
13755-4	0.11844	0.688325	0.193235
13761-4	0.120598	0.717805	0.161597
13764-4	0.0993723	0.647771	0.252856
13765-4	0.122909	0.645388	0.231703
13767-4	0.0904009	0.756887	0.152713
13774-4	0.0702163	0.763536	0.166247
13777-4	0.075547	0.716601	0.207852
13779-4	0.0755827	0.705396	0.219021
1378-4	0.138473	0.591599	0.269928
13781-4	0.0934162	0.694168	0.212416
13782-4	0.126448	0.693611	0.179941
13795-4	0.115535	0.676377	0.208088
13800-4	0.124924	0.708666	0.16641
13802-4	0.0962368	0.700657	0.203107
13804-4	0.112325	0.645089	0.242586
13808-4	0.103448	0.738343	0.158209
13809-4	0.100446	0.747201	0.152353
13810-4	0.144012	0.686842	0.169146
13811-4	0.13132	0.685041	0.183639
13814-4	0.0992192	0.670082	0.230699
13815-4	0.112715	0.630623	0.256662
13820-4	0.119227	0.733982	0.146792
13824-4	0.0902422	0.75514	0.154617
13825-4	0.153848	0.676569	0.169582
13834-4	0.0923758	0.76235	0.145275
13836-4	0.134117	0.681346	0.184537
13843-4	0.125098	0.665201	0.209701
1385-4	0.12559	0.611406	0.263004
13850-4	0.152833	0.670751	0.176415
13851-4	0.0915142	0.766475	0.142011
13852-4	0.137833	0.676535	0.185632
1386-4	0.0992797	0.658038	0.242682
13861-4	0.152167	0.641544	0.206289
13863-4	0.102778	0.674112	0.22311
13889-4	0.156543	0.657488	0.18597
13890-4	0.0704025	0.791462	0.138136
13894-4	0.187844	0.650197	0.161959
13900-4	0.0802009	0.721092	0.198707
13901-4	0.0728296	0.799182	0.127988
13905-4	0.0933291	0.69133	0.215341
13916-4	0.104021	0.679197	0.216782
13917-4	0.0688669	0.737027	0.194106
13922-4	0.0976753	0.769607	0.132717
13940-4	0.0693953	0.793338	0.137267
13942-4	0.127295	0.695313	0.177392
13947-4	0.101675	0.753845	0.144479
13958-4	0.0993871	0.704284	0.196329
13959-4	0.0622898	0.803314	0.134396
1396-4	0.120336	0.684921	0.194743
13960-4	0.0330052	0.713046	0.253948
13968-4	0.115076	0.696344	0.18858
13974-4	0.0777113	0.751655	0.170634
13977-4	0.107309	0.770633	0.122058
13978-4	0.048992	0.773763	0.177245
13984-4	0.0737227	0.840511	0.0857668
13985-4	0.0781102	0.769299	0.152591
13994-4	0.10385	0.76194	0.13421
13998-4	0.101521	0.793667	0.104813
14000-4	0.140637	0.796109	0.0632537
14001-4	0.0781042	0.764983	0.156913
14004-4	0.141113	0.783969	0.0749178
14007-4	0.0999979	0.691494	0.208508
14009-4	0.131609	0.745815	0.122576
14016-4	0.0949197	0.786904	0.118177
14021-4	0.142649	0.799953	0.0573978
14025-4	0.103885	0.788641	0.107474
14027-4	0.10658	0.75406	0.13936
14034-4	0.088304	0.807096	0.1046
14035-4	0.0924933	0.793512	0.113995
14041-4	0.0903801	0.758696	0.150924
14044-4	0.0841942	0.792436	0.12337
1406-4	0.117586	0.590606	0.291808
14068-4	0.0765965	0.776265	0.147138
14072-4	0.146756	0.832142	0.0211015
14092-4	0.0554656	0.804813	0.139721
14095-4	0.0796776	0.823516	0.096806
14113-4	0.0759225	0.79787	0.126207
14115-4	0.0454411	0.808214	0.146345
14119-4	0.0937815	0.811858	0.094361
14121-4	0.0937823	0.803346	0.102872
14122-4	0.0460888	0.796194	0.157717
14125-4	0.0691213	0.824267	0.106611
14128-4	0.0597528	0.834261	0.105986
14130-4	0.0824833	0.805275	0.112242
14136-4	0.0781238	0.837305	0.0845717
1414-4	0.12872	0.61047	0.26081
14151-4	0.0506729	0.7906	0.158727
14162-4	0.0610093	0.786297	0.152693
14174-4	0.0843718	0.889479	0.0261489
14175-4	0.0602212	0.816455	0.123323
14176-4	0.0630632	0.82258	0.114356
14181-4	0.0960208	0.799912	0.104067
14194-4	0.0775996	0.747941	0.174459
14221-4	0.0951295	0.813395	0.0914753
14264-4	0.136613	0.686083	0.177304
14284-4	0.0971606	0.79756	0.105279
14311-4	0.0638826	0.835345	0.100773
14328-4	0.0952005	0.799254	0.105545
14332-4	0.082432	0.800639	0.116929
14347-4	0.0261814	0.892286	0.0815325
1436-4	0.112805	0.601435	0.28576
14360-4	0.0704907	0.815212	0.114297
14387-4	0.155534	0.83743	0.00703543
14401-4	0.0262107	0.906666	0.0671235
1442-4	0.139548	0.597256	0.263195
1444-4	0.112656	0.596875	0.290469
14444-4	0.118157	0.823869	0.0579741
14447-4	0.12915	0.829357	0.0414927
1445-4	0.130631	0.609114	0.260255
14462-4	0.108792	0.834724	0.056484
14473-4	0.00308237	0.985738	0.0111794
1449-4	0.107406	0.622203	0.270392
14501-4	0.113819	0.816132	0.0700489
14502-4	0.139281	0.829997	0.0307218
14504-4	0.111152	0.825542	0.0633059
1451-4	0.145756	0.595776	0.258468
14512-4	0.160828	0.532708	0.306464
14513-4	0.160766	0.533129	0.306104
14515-4	0.15873	0.542732	0.298538
14519-4	0.134414	0.551815	0.313772
14529-4	0.130324	0.556517	0.313159
14530-4	0.0965865	0.564354	0.33906
14533-4	0.194232	0.376766	0.429001
1454-4	0.162401	0.669922	0.167677
14544-4	0.138981	0.538308	0.322711
14545-4	0.158293	0.531078	0.310628
14546-4	0.15064	0.595233	0.254127
14551-4	0.200801	0.367914	0.431285
14554-4	0.129429	0.555938	0.314633
14558-4	0.143214	0.623323	0.233463
14559-4	0.150207	0.587952	0.261842
14566-4	0.157504	0.523509	0.318986
14569-4	0.133802	0.619383	0.246815
14570-4	0.145382	0.542946	0.311672
14576-4	0.127209	0.554248	0.318544
14577-4	0.142634	0.563059	0.294306
14587-4	0.128174	0.627611	0.244214
14593-4	0.164931	0.601728	0.23334
14600-4	0.158166	0.560196	0.281638
14604-4	0.149503	0.537977	0.31252
14609-4	0.314826	0.35353	0.331644
14611-4	0.142959	0.549818	0.307223
14612-4	0.131304	0.559583	0.309113
14619-4	0.129585	0.558529	0.311886
1462-4	0.127114	0.602627	0.270259
14622-4	0.161262	0.598714	0.240024
14623-4	0.132042	0.579114	0.288844
14624-4	0.146517	0.540375	0.313108
14630-4	0.159933	0.540616	0.299451
14632-4	0.135661	0.611917	0.252421
14637-4	0.117138	0.639964	0.242898
14647-4	0.164929	0.590871	0.2442
14648-4	0.125405	0.57765	0.296945
14652-4	0.129691	0.560944	0.309366
14654-4	0.164198	0.532188	0.303615
14663-4	0.131355	0.560235	0.30841
14666-4	0.164407	0.531501	0.304091
14688-4	0.126118	0.614872	0.259011
14709-4	0.0998668	0.641043	0.25909
14719-4	0.125043	0.613358	0.261599
14720-4	0.103415	0.638778	0.257807
14722-4	0.150772	0.600335	0.248893
14724-4	0.124354	0.641457	0.234189
14726-4	0.171636	0.549325	0.279039
14731-4	0.135815	0.557039	0.307146
14733-4	0.123534	0.627056	0.24941
14739-4	0.120782	0.616228	0.262989
14743-4	0.124097	0.622859	0.253044
14749-4	0.14401	0.576243	0.279748
14755-4	0.160252	0.545057	0.294692
14760-4	0.144095	0.577184	0.278721
14761-4	0.110194	0.648403	0.241403
14766-4	0.118381	0.610126	0.271494
14768-4	0.209863	0.570443	0.219694
14780-4	0.124921	0.619877	0.255202
14782-4	0.284966	0.500925	0.21411
14785-4	0.145864	0.5749	0.279237
14791-4	0.116936	0.615198	0.267866
14792-4	0.109223	0.635435	0.255342
14796-4	0.126057	0.590358	0.283585
14797-4	0.213579	0.576039	0.210382
14800-4	0.106301	0.632704	0.260995
14803-4	0.143878	0.601489	0.254633
14804-4	0.142316	0.599722	0.257962
14819-4	0.0949886	0.65961	0.245401
14823-4	0.120239	0.650444	0.229316
14843-4	0.0898782	0.658455	0.251667
14844-4	0.127231	0.66562	0.207149
14845-4	0.152919	0.594413	0.252668
14849-4	0.208545	0.573072	0.218383
14860-4	0.204227	0.559687	0.236086
14865-4	0.132496	0.583474	0.284029
14872-4	0.126315	0.589974	0.28371
14873-4	0.135	0.57926	0.28574
14878-4	0.143203	0.593949	0.262848
14883-4	0.130516	0.589835	0.279649
149-4	0.128349	0.370761	0.50089
1490-4	0.108097	0.684464	0.207439
14905-4	0.112003	0.624462	0.263535
14906-4	0.218022	0.591699	0.190278
14910-4	0.105008	0.649604	0.245389
14918-4	0.138101	0.659721	0.202178
14924-4	0.0968153	0.651745	0.251439
14929-4	0.140045	0.587206	0.272749
14939-4	0.10238	0.581352	0.316268
14945-4	0.132333	0.58734	0.280327
14952-4	0.119121	0.588318	0.292561
14953-4	0.114639	0.593505	0.291856
14954-4	0.11119	0.633261	0.255549
14958-4	0.136299	0.614743	0.248959
14968-4	0.138064	0.61434	0.247596
14973-4	0.0959305	0.605071	0.298999
14990-4	0.21124	0.597038	0.191722
14997-4	0.133886	0.615739	0.250375
150-4	0.131028	0.36502	0.503953
1500-4	0.101242	0.612172	0.286586
15007-4	0.109363	0.63665	0.253987
1502-4	0.0796739	0.641739	0.278587
15028-4	0.0670495	0.271753	0.661198
15030-4	0.132814	0.669208	0.197978
1505-4	0.0996394	0.687188	0.213173
15055-4	0.132723	0.623811	0.243465
15066-4	0.100788	0.610581	0.288631
15077-4	0.264329	0.42389	0.311781
1508-4	0.115173	0.682269	0.202558
15094-4	0.20027	0.600414	0.199316
15098-4	0.203095	0.598185	0.19872
15107-4	0.0986686	0.638533	0.262798
15126-4	0.115497	0.626414	0.258088
15130-4	0.150435	0.665033	0.184533
15140-4	0.100746	0.670281	0.228973
15143-4	0.095115	0.694166	0.210719
15155-4	0.131665	0.611928	0.256407
1516-4	0.119368	0.672945	0.207687
15162-4	0.0993464	0.686929	0.213724
15163-4	0.0914061	0.70348	0.205114
15188-4	0.14388	0.560746	0.295374
1519-4	0.104632	0.611332	0.284036
15195-4	0.12466	0.612278	0.263062
1520-4	0.100088	0.618238	0.281673
15202-4	0.135716	0.576812	0.287472
15212-4	0.149695	0.671498	0.178808
15218-4	0.0865124	0.693738	0.21975
15223-4	0.148142	0.573747	0.278111
15225-4	0.138723	0.57689	0.284386
15233-4	0.141232	0.567882	0.290886
15234-4	0.105015	0.63237	0.262615
15239-4	0.092512	0.608154	0.299334
15251-4	0.159814	0.613367	0.226819
15254-4	0.111948	0.627274	0.260778
15259-4	0.147648	0.666349	0.186003
15265-4	0.0924849	0.629663	0.277852
15267-4	0.130695	0.612192	0.257113
15268-4	0.136757	0.587864	0.275379
15283-4	0.161479	0.674491	0.16403
15284-4	0.102036	0.63145	0.266514
15293-4	0.137579	0.605631	0.25679
153-4	0.225068	0.256358	0.518575
15301-4	0.0997489	0.578961	0.32129
15315-4	0.136094	0.611241	0.252665
15322-4	0.130833	0.567852	0.301315
15332-4	0.0609207	0.600307	0.338773
1534-4	0.100986	0.609135	0.289879
15349-4	0.13922	0.603005	0.257775
1535-4	0.106555	0.609669	0.283776
15351-4	0.0865823	0.613508	0.29991
15359-4	0.150512	0.563453	0.286035
15369-4	0.139848	0.671568	0.188584
1537-4	0.109946	0.6821	0.207955
15382-4	0.0705723	0.613791	0.315636
15387-4	0.0709003	0.620778	0.308322
15391-4	0.083569	0.605526	0.310905
15392-4	0.0793063	0.626414	0.29428
15396-4	0.134465	0.620363	0.245172
15400-4	0.125645	0.600744	0.273611
15405-4	0.163026	0.554951	0.282023
15406-4	0.0813083	0.617975	0.300716
15411-4	0.148121	0.562546	0.289334
15416-4	0.0726446	0.628141	0.299215
15419-4	0.138917	0.59021	0.270873
15421-4	0.159495	0.53896	0.301544
15429-4	0.331654	0.253845	0.414502
15434-4	0.0865556	0.607789	0.305656
1544-4	0.122583	0.675162	0.202255
15449-4	0.126548	0.596185	0.277267
15451-4	0.0710673	0.626904	0.302029
1547-4	0.111722	0.672398	0.215879
15470-4	0.13525	0.594439	0.270311
15474-4	0.136153	0.596143	0.267704
15475-4	0.155953	0.535646	0.308401
15477-4	0.162881	0.540876	0.296243
15479-4	0.13789	0.595387	0.266723
1548-4	0.0863063	0.611047	0.302646
15481-4	0.158716	0.532425	0.308858
15489-4	0.0413718	0.560717	0.397911
15490-4	0.0597614	0.543892	0.396346
15495-4	0.146833	0.660911	0.192256
15496-4	0.0684102	0.626364	0.305226
15500-4	0.0800296	0.62421	0.29576
15508-4	0.125511	0.607306	0.267183
15516-4	0.144835	0.604461	0.250705
15517-4	0.0553376	0.614636	0.330026
15519-4	0.0689353	0.547455	0.38361
15521-4	0.0726313	0.627235	0.300134
15525-4	0.0414769	0.552845	0.405678
15529-4	0.124655	0.608599	0.266746
15530-4	0.194001	0.565263	0.240736
15532-4	0.138799	0.65734	0.203861
15536-4	0.0753962	0.550636	0.373968
15538-4	0.0813627	0.554837	0.3638
15542-4	0.145364	0.642601	0.212036
15546-4	0.0720155	0.538895	0.38909
15547-4	0.153923	0.655429	0.190649
15549-4	0.150747	0.65842	0.190833
15556-4	0.146053	0.659112	0.194834
15558-4	0.0871708	0.550439	0.36239
15561-4	0.0795382	0.546392	0.374069
15562-4	0.0467199	0.557723	0.395557
15569-4	0.11942	0.611532	0.269048
15570-4	0.141805	0.640292	0.217903
15581-4	0.151366	0.662908	0.185726
15584-4	0.143667	0.665283	0.19105
15585-4	0.139235	0.666783	0.193982
15593-4	0.156935	0.668436	0.174628
15595-4	0.149648	0.663981	0.186372
15602-4	0.18861	0.403573	0.407817
15608-4	0.176782	0.556689	0.266529
15609-4	0.187334	0.555691	0.256976
15613-4	0.0864596	0.562085	0.351456
15616-4	0.0480424	0.59391	0.358048
15624-4	0.062761	0.620622	0.316617
15628-4	0.0801262	0.566938	0.352936
15631-4	0.125074	0.599976	0.27495
15634-4	0.188392	0.557738	0.25387
1564-4	0.121949	0.664972	0.213079
15650-4	0.100717	0.552184	0.347099
15653-4	0.110264	0.614148	0.275588
15656-4	0.203115	0.417925	0.37896
15664-4	0.103468	0.652705	0.243827
15670-4	0.138414	0.655244	0.206342
15674-4	0.156098	0.631169	0.212733
15676-4	0.158938	0.674664	0.166398
15691-4	0.0409045	0.581142	0.377953
15696-4	0.139381	0.679088	0.181531
15697-4	0.0564534	0.624877	0.318669
15698-4	0.086737	0.558305	0.354958
15701-4	0.11768	0.638274	0.244046
15708-4	0.125049	0.635232	0.239719
1571-4	0.120711	0.674772	0.204518
15712-4	0.100047	0.556922	0.343031
15722-4	0.133952	0.653397	0.212652
15723-4	0.155758	0.647494	0.196748
15724-4	0.0903255	0.661725	0.24795
15729-4	0.153392	0.636212	0.210395
15737-4	0.0790568	0.544049	0.376894
15740-4	0.12294	0.656635	0.220425
15742-4	0.0380433	0.578552	0.383405
15747-4	0.0947287	0.560397	0.344874
15748-4	0.128777	0.661609	0.209615
15751-4	0.117675	0.559996	0.322329
15765-4	0.0802256	0.559107	0.360667
15770-4	0.117951	0.633901	0.248148
15771-4	0.0821285	0.552815	0.365057
15775-4	0.155664	0.629072	0.215264
15776-4	0.0699487	0.655988	0.274063
15778-4	0.0800287	0.68815	0.231821
15781-4	0.129055	0.656289	0.214656
1579-4	0.115601	0.680282	0.204118
15793-4	0.0870735	0.675042	0.237884
15796-4	0.225068	0.609469	0.165463
158-4	0.218083	0.427886	0.354031
15802-4	0.10514	0.556331	0.338529
15803-4	0.174722	0.532676	0.292602
15805-4	0.116934	0.637137	0.245929
15807-4	0.14124	0.695481	0.163279
15809-4	0.101736	0.555565	0.342699
15810-4	0.163898	0.605315	0.230787
15816-4	0.0471586	0.577489	0.375352
15817-4	0.114045	0.602975	0.28298
15819-4	0.13103	0.694641	0.174329
15824-4	0.124363	0.557218	0.318419
15827-4	0.0844683	0.547124	0.368408
15829-4	0.120548	0.591275	0.288177
1583-4	0.107216	0.672572	0.220212
15831-4	0.0533633	0.570635	0.376002
15836-4	0.131135	0.619342	0.249523
15839-4	0.0959917	0.696081	0.207927
15841-4	0.152333	0.6134	0.234267
15844-4	0.0538651	0.580652	0.365483
15851-4	0.147936	0.623176	0.228887
15852-4	0.127398	0.60958	0.263022
15855-4	0.0569061	0.584285	0.358809
15859-4	0.130408	0.659832	0.20976
15860-4	0.129072	0.563942	0.306986
15861-4	0.117619	0.582702	0.299679
15864-4	0.0937539	0.706556	0.19969
15865-4	0.102792	0.676054	0.221153
15879-4	0.128637	0.662202	0.209161
15880-4	0.069246	0.696483	0.234271
15881-4	0.160196	0.61515	0.224654
15882-4	0.109096	0.681021	0.209884
15884-4	0.132684	0.607621	0.259695
15885-4	0.061397	0.707105	0.231498
15898-4	0.100293	0.546266	0.35344
15899-4	0.0976807	0.558622	0.343698
15901-4	0.0724519	0.698879	0.228669
15903-4	0.146544	0.740973	0.112483
15909-4	0.10961	0.572343	0.318047
15914-4	0.0827309	0.545473	0.371796
15916-4	0.0619306	0.610012	0.328057
15919-4	0.0860642	0.551108	0.362828
15921-4	0.153584	0.620532	0.225885
15923-4	0.130713	0.614275	0.255012
15927-4	0.163032	0.732529	0.104439
15932-4	0.0879971	0.547691	0.364312
15933-4	0.132174	0.626179	0.241647
15935-4	0.159948	0.494901	0.345151
15936-4	0.0896656	0.546033	0.364302
15941-4	0.11411	0.566184	0.319706
15949-4	0.0986016	0.551614	0.349784
15952-4	0.164581	0.469686	0.365733
15955-4	0.150403	0.705823	0.143775
15957-4	0.0860009	0.54502	0.368979
15964-4	0.142698	0.53006	0.327241
15967-4	0.0579797	0.602817	0.339204
15968-4	0.125486	0.574439	0.300075
15971-4	0.0969824	0.624081	0.278937
15972-4	0.116432	0.621035	0.262533
15976-4	0.169845	0.488376	0.34178
15989-4	0.150038	0.729585	0.120376
15994-4	0.145042	0.749319	0.105639
16001-4	0.115768	0.620828	0.263404
16004-4	0.0910797	0.626407	0.282513
16007-4	0.0890905	0.630857	0.280052
16021-4	0.0710322	0.581387	0.347581
16027-4	0.0793898	0.698554	0.222056
16031-4	0.110174	0.574813	0.315013
16042-4	0.0897269	0.62323	0.287043
16053-4	0.115624	0.596432	0.287945
16055-4	0.0905712	0.628524	0.280905
16066-4	0.121564	0.570473	0.307963
16069-4	0.133913	0.646848	0.219239
16083-4	0.0818208	0.588116	0.330063
16087-4	0.0762607	0.59307	0.33067
16092-4	0.104609	0.710918	0.184473
16093-4	0.0753902	0.62311	0.3015
16097-4	0.119657	0.598509	0.281833
16106-4	0.141726	0.536854	0.32142
16110-4	0.132213	0.666054	0.201733
16111-4	0.167098	0.638435	0.194467
16121-4	0.0809844	0.596885	0.32213
16135-4	0.164419	0.653938	0.181642
16140-4	0.0872453	0.63831	0.274445
16141-4	0.142604	0.628907	0.228489
16142-4	0.0999371	0.5878	0.312263
16150-4	0.140867	0.544291	0.314842
16160-4	0.134183	0.549618	0.316199
16177-4	0.126366	0.53618	0.337455
16179-4	0.10308	0.733288	0.163632
16183-4	0.137213	0.661063	0.201725
16186-4	0.131571	0.662368	0.206061
1619-4	0.112338	0.682534	0.205128
16198-4	0.118204	0.671204	0.210592
16202-4	0.128927	0.553233	0.31784
16208-4	0.150338	0.648908	0.200754
16209-4	0.0969183	0.61698	0.286102
16217-4	0.12952	0.547228	0.323253
16218-4	0.135934	0.831861	0.0322049
16220-4	0.0778841	0.694252	0.227864
16230-4	0.112954	0.646236	0.24081
16231-4	0.0840516	0.650104	0.265844
16241-4	0.0937458	0.646665	0.25959
16243-4	0.109535	0.740732	0.149732
16247-4	0.116687	0.592988	0.290325
16250-4	0.103842	0.738471	0.157687
16268-4	0.0891246	0.659117	0.251759
16271-4	0.0754355	0.726071	0.198493
16276-4	0.0808889	0.69088	0.228231
16280-4	0.100579	0.651073	0.248348
16289-4	0.104117	0.605701	0.290182
16296-4	0.084399	0.650133	0.265468
16299-4	0.0979053	0.61599	0.286105
16301-4	0.0759978	0.743355	0.180648
16306-4	0.0811795	0.724538	0.194283
1631-4	0.114738	0.652001	0.23326
16312-4	0.0834892	0.699557	0.216954
16322-4	0.101343	0.617238	0.281419
16323-4	0.102528	0.604836	0.292636
16329-4	0.0876287	0.633267	0.279104
16330-4	0.20425	0.675293	0.120457
16331-4	0.0738456	0.741482	0.184673
16342-4	0.0965838	0.599948	0.303468
16343-4	0.121752	0.560469	0.317779
16344-4	0.0906164	0.61272	0.296663
16345-4	0.103198	0.600217	0.296585
16349-4	0.0891085	0.59828	0.312612
16351-4	0.0795969	0.65678	0.263623
16352-4	0.0895687	0.595636	0.314795
16359-4	0.0979133	0.621838	0.280249
1638-4	0.107582	0.681058	0.21136
16381-4	0.0979229	0.631836	0.270241
16383-4	0.11855	0.72462	0.15683
16390-4	0.100055	0.622427	0.277518
16391-4	0.107347	0.568278	0.324376
16395-4	0.113595	0.633001	0.253403
16396-4	0.103384	0.584017	0.312598
16405-4	0.0797784	0.601763	0.318459
16415-4	0.0785016	0.610411	0.311088
16416-4	0.0896731	0.603534	0.306792
16420-4	0.104094	0.674454	0.221452
16428-4	0.0975512	0.638824	0.263625
16429-4	0.101446	0.786459	0.112094
16430-4	0.099154	0.62922	0.271626
16434-4	0.0768412	0.610864	0.312295
1644-4	0.0935184	0.608454	0.298027
16450-4	0.0813277	0.67197	0.246703
16462-4	0.109593	0.625326	0.265081
16466-4	0.100545	0.67018	0.229274
16485-4	0.1163	0.797346	0.0863538
16489-4	0.0765216	0.791701	0.131777
16491-4	0.088265	0.625505	0.28623
16499-4	0.103276	0.618013	0.27871
16503-4	0.0454516	0.813884	0.140665
16521-4	0.0747921	0.790925	0.134283
16526-4	0.0803191	0.796359	0.123322
16529-4	0.110225	0.6645	0.225276
1656-4	0.11783	0.646146	0.236024
16563-4	0.235963	0.724208	0.039829
16566-4	0.0471174	0.81664	0.136243
16569-4	0.0790936	0.648814	0.272093
16598-4	0.0952738	0.679756	0.224971
16601-4	0.0226392	0.816989	0.160372
16614-4	0.077547	0.783528	0.138925
16616-4	0.11292	0.680304	0.206776
16619-4	0.104058	0.686131	0.209811
16620-4	0.0747234	0.697009	0.228268
16623-4	0.0517131	0.826281	0.122006
16628-4	0.093742	0.688896	0.217362
16633-4	0.0466192	0.83307	0.12031
16641-4	0.0754361	0.662508	0.262056
16650-4	0.0879047	0.683546	0.22855
16651-4	0.118307	0.679882	0.201811
16658-4	0.0925562	0.687078	0.220366
16661-4	0.0569911	0.786191	0.156818
1668-4	0.104809	0.683431	0.21176
16695-4	0.0917251	0.671678	0.236596
167-4	0.135411	0.386827	0.477761
16709-4	0.0918328	0.674312	0.233856
16719-4	0.092057	0.679054	0.228889
1673-4	0.123093	0.699039	0.177868
16735-4	0.0696561	0.78368	0.146664
1674-4	0.110445	0.618239	0.271316
16742-4	0.0984717	0.679492	0.222036
16744-4	0.0827282	0.785505	0.131767
16753-4	0.0547144	0.664031	0.281255
16766-4	0.0600279	0.766873	0.173099
16784-4	0.0813765	0.779837	0.138786
16789-4	0.108394	0.846932	0.0446741
1679-4	0.0995702	0.619109	0.281321
16837-4	0.0965386	0.820542	0.0829196
16856-4	0.0768967	0.707184	0.215919
16857-4	0.0652348	0.673426	0.261339
16873-4	0.135333	0.86092	0.00374772
16884-4	0.0829214	0.670266	0.246812
16885-4	0.0157583	0.67363	0.310612
16888-4	0.0632114	0.756432	0.180356
16889-4	0.13409	0.708406	0.157505
16893-4	0.0963243	0.657032	0.246643
16900-4	0.0678191	0.817073	0.115108
16901-4	0.0951664	0.8049	0.0999336
16909-4	0.0740592	0.750187	0.175754
16910-4	0.0544852	0.745255	0.20026
16917-4	0.105872	0.649518	0.24461
16918-4	0.0972291	0.885053	0.0177183
16931-4	0.0684228	0.67718	0.254397
1694-4	0.116992	0.652536	0.230472
16946-4	0.0484381	0.732842	0.21872
16952-4	0.00653737	0.863545	0.129917
16956-4	0.151356	0.707345	0.141299
16960-4	0.0436359	0.677017	0.279347
16980-4	0.0897632	0.65482	0.255417
16993-4	0.0869025	0.715559	0.197539
17002-4	0.0699929	0.712911	0.217096
17038-4	0.0607673	0.847887	0.091346
17046-4	0.0685418	0.738291	0.193167
1708-4	0.12136	0.71178	0.16686
17091-4	0.102388	0.676759	0.220853
17099-4	0.104023	0.639968	0.25601
17102-4	0.126881	0.661973	0.211147
17103-4	0.080241	0.857417	0.0623422
17112-4	0.0582375	0.830546	0.111217
17158-4	0.00132652	0.741586	0.257087
1716-4	0.0812343	0.672602	0.246164
17175-4	0.17118	0.604581	0.224239
17206-4	0.0512968	0.719437	0.229266
17222-4	0.190676	0.592909	0.216415
17263-4	0.124069	0.70343	0.172501
17267-4	0.106907	0.765192	0.127901
1727-4	0.0887014	0.63322	0.278078
17292-4	0.19225	0.593936	0.213814
17312-4	0.209003	0.571107	0.219889
17329-4	0.469369	0.518872	0.0117591
17336-4	0.113223	0.772664	0.114114
17341-4	0.20673	0.561998	0.231272
17347-4	0.210376	0.670577	0.119047
17364-4	0.17236	0.610418	0.217222
17380-4	0.0346436	0.754503	0.210854
17385-4	0.202263	0.573305	0.224432
17411-4	0.137591	0.675276	0.187133
17418-4	0.114375	0.759868	0.125756
17421-4	0.199038	0.588578	0.212384
1747-4	0.108476	0.654782	0.236742
175-4	0.276401	0.319544	0.404055
17528-4	0.0443184	0.796762	0.15892
17555-4	0.0780251	0.79529	0.126685
17565-4	0.0874825	0.763649	0.148868
17566-4	0.0855979	0.832506	0.0818961
17574-4	0.0788009	0.768382	0.152817
17575-4	0.0406775	0.808543	0.15078
17594-4	0.0752768	0.787456	0.137267
17606-4	0.068185	0.780562	0.151253
17607-4	0.121502	0.684079	0.194419
17609-4	0.0759292	0.792471	0.1316
17612-4	0.122127	0.73282	0.145053
17614-4	0.0703109	0.84617	0.0835192
17625-4	0.135173	0.692558	0.172268
17630-4	0.102608	0.720962	0.176429
17634-4	0.0402728	0.758995	0.200732
17636-4	0.0688289	0.789611	0.141561
17648-4	0.0961982	0.721036	0.182766
17651-4	0.0672349	0.788666	0.144099
17658-4	0.09435	0.729087	0.176563
17660-4	0.0769762	0.779912	0.143112
17670-4	0.0634427	0.803153	0.133404
17672-4	0.0681733	0.784439	0.147388
17680-4	0.0940543	0.723674	0.182271
17682-4	0.131202	0.753065	0.115733
17687-4	0.0459652	0.785277	0.168758
17690-4	0.0895296	0.792901	0.117569
17693-4	0.0485043	0.709775	0.241721
17700-4	0.266848	0.577997	0.155154
17705-4	0.0675527	0.834315	0.0981324
17709-4	0.0255548	0.693627	0.280818
17718-4	0.0720496	0.798513	0.129438
17723-4	0.0622169	0.785834	0.151949
17727-4	0.145656	0.717865	0.13648
17749-4	0.0457499	0.78964	0.16461
17750-4	0.0511642	0.776099	0.172737
17759-4	0.0563044	0.783652	0.160044
17761-4	0.0797372	0.812191	0.108072
17767-4	0.0599968	0.778386	0.161617
17869-4	0.0838819	0.799562	0.116556
17889-4	0.136374	0.634561	0.229065
17899-4	0.0793486	0.712355	0.208296
17927-4	0.083422	0.81034	0.106238
17933-4	0.105431	0.8297	0.064869
17937-4	0.064586	0.82102	0.114394
17941-4	0.0295152	0.766247	0.204238
17969-4	0.0805105	0.75364	0.16585
17973-4	0.0263871	0.769726	0.203886
17975-4	0.0879078	0.773014	0.139079
17976-4	0.0276181	0.741371	0.23101
17991-4	0.0638997	0.816194	0.119906
17998-4	0.0628546	0.823372	0.113773
18012-4	0.0546716	0.833646	0.111683
18013-4	0.0735623	0.798165	0.128272
18037-4	0.126533	0.779081	0.0943862
18046-4	0.0599765	0.832688	0.107336
18078-4	0.1328	0.767731	0.0994684
18084-4	0.0878661	0.743194	0.16894
18089-4	0.0638565	0.747587	0.188556
18109-4	0.12523	0.776655	0.0981146
18116-4	0.0581375	0.769814	0.172048
1814-4	0.123556	0.697843	0.178601
1815-4	0.117356	0.703654	0.17899
18151-4	0.10551	0.753902	0.140588
18177-4	0.0907152	0.789307	0.119977
18180-4	0.0651159	0.814996	0.119888
18187-4	0.10401	0.769532	0.126457
18195-4	0.116477	0.773462	0.11006
18199-4	0.0655127	0.800675	0.133812
18228-4	0.0893503	0.749051	0.161599
18250-4	0.16723	0.710959	0.121811
18265-4	0.105397	0.74161	0.152993
18272-4	0.0823988	0.909092	0.00850967
18281-4	0.0831027	0.761037	0.155861
18286-4	0.0670174	0.790634	0.142349
18298-4	0.0599077	0.825214	0.114879
18302-4	0.0504562	0.826893	0.122651
18307-4	0.0570933	0.793618	0.149289
18314-4	0.0833639	0.756234	0.160402
18320-4	0.156786	0.697073	0.146141
18327-4	0.163167	0.670928	0.165905
18329-4	0.142723	0.793795	0.0634816
18339-4	0.074085	0.810361	0.115554
18358-4	0.0812812	0.805276	0.113443
1836-4	0.106231	0.654429	0.23934
18366-4	0.132937	0.779583	0.08748
18372-4	0.0850227	0.831698	0.0832792
18386-4	0.104845	0.810405	0.0847497
18404-4	0.154373	0.698546	0.147081
18429-4	0.136993	0.647975	0.215032
18444-4	0.109013	0.823182	0.0678047
18454-4	0.0715501	0.81356	0.11489
18462-4	0.152089	0.589842	0.258069
1848-4	0.0927604	0.691044	0.216196
18484-4	0.159388	0.591521	0.249092
18489-4	0.154603	0.58227	0.263127
18491-4	0.128049	0.557091	0.31486
18500-4	0.131937	0.556045	0.312018
18507-4	0.14056	0.536294	0.323146
18511-4	0.126693	0.61631	0.256997
18517-4	0.210195	0.570305	0.219501
18520-4	0.123829	0.629671	0.2465
18521-4	0.121993	0.641153	0.236854
18522-4	0.166545	0.534855	0.298601
18527-4	0.140813	0.547517	0.311671
18528-4	0.148182	0.572954	0.278865
18533-4	0.212919	0.576219	0.210862
18537-4	0.12577	0.60963	0.2646
18540-4	0.103193	0.649759	0.247048
18542-4	0.211045	0.566744	0.222211
18545-4	0.128392	0.619558	0.25205
18550-4	0.109774	0.6476	0.242626
18560-4	0.118086	0.616304	0.26561
18571-4	0.102132	0.645139	0.25273
18582-4	0.136207	0.590986	0.272807
18589-4	0.0976884	0.642973	0.259339
1859-4	0.0482962	0.80313	0.148574
18596-4	0.131937	0.65498	0.213083
18606-4	0.107182	0.642252	0.250567
18609-4	0.161426	0.65653	0.182045
18615-4	0.119488	0.605978	0.274535
18617-4	0.13546	0.59801	0.26653
18627-4	0.130174	0.61157	0.258256
18633-4	0.138981	0.560728	0.300291
18638-4	0.182891	0.548467	0.268642
18643-4	0.134317	0.595704	0.269978
18645-4	0.149229	0.65218	0.198592
18665-4	0.118519	0.598806	0.282675
18670-4	0.149196	0.658906	0.191898
18671-4	0.1599	0.551949	0.288151
18684-4	0.140715	0.617349	0.241936
18685-4	0.0610172	0.614899	0.324083
18711-4	0.153864	0.676417	0.169719
18714-4	0.129476	0.621398	0.249126
18719-4	0.12735	0.629581	0.243069
18734-4	0.146327	0.563934	0.289739
18741-4	0.15324	0.625263	0.221497
18747-4	0.097056	0.559604	0.343339
18753-4	0.0700888	0.692211	0.2377
18761-4	0.106897	0.576953	0.316149
18766-4	0.072135	0.700975	0.22689
18770-4	0.117787	0.565148	0.317065
18771-4	0.0803793	0.691363	0.228258
18772-4	0.072707	0.692653	0.23464
18775-4	0.131645	0.655727	0.212628
18776-4	0.0787573	0.698378	0.222865
18780-4	0.156888	0.515577	0.327536
18783-4	0.109185	0.564359	0.326456
18784-4	0.0930013	0.62624	0.280759
18788-4	0.14386	0.530669	0.325471
18790-4	0.0893746	0.709261	0.201365
18792-4	0.0708316	0.576243	0.352925
18795-4	0.130899	0.642977	0.226124
18797-4	0.103026	0.698654	0.19832
1880-4	0.0423028	0.823675	0.134022
18802-4	0.0906514	0.629739	0.279609
18804-4	0.155409	0.734958	0.109632
18805-4	0.0688278	0.703446	0.227726
18809-4	0.132531	0.634815	0.232654
1881-4	0.0536611	0.820483	0.125856
18812-4	0.0831592	0.629092	0.287749
18818-4	0.0886702	0.630655	0.280675
18821-4	0.0892794	0.630919	0.279801
18823-4	0.0802031	0.664275	0.255522
18825-4	0.154178	0.661719	0.184103
18827-4	0.0878092	0.629117	0.283073
18833-4	0.0712249	0.715245	0.213531
18836-4	0.0984937	0.717561	0.183945
18841-4	0.0930135	0.717013	0.189973
18844-4	0.172394	0.728565	0.0990407
18847-4	0.0861673	0.632888	0.280945
18848-4	0.0803946	0.732604	0.187002
18853-4	0.109414	0.591328	0.299258
18855-4	0.0831687	0.724459	0.192372
18861-4	0.0899266	0.646604	0.263469
18871-4	0.100757	0.649332	0.249911
18881-4	0.103504	0.608786	0.28771
18883-4	0.108642	0.732855	0.158503
18890-4	0.113215	0.591199	0.295586
18891-4	0.117237	0.732304	0.150459
18894-4	0.101155	0.597685	0.30116
18896-4	0.107091	0.666927	0.225982
18902-4	0.0872316	0.6334	0.279368
18906-4	0.109357	0.755311	0.135333
18919-4	0.118397	0.728297	0.153306
18920-4	0.0964815	0.591302	0.312217
18942-4	0.104035	0.630213	0.265753
18944-4	0.112916	0.740864	0.14622
18948-4	0.105863	0.574167	0.31997
18954-4	0.0787734	0.791919	0.129307
18969-4	0.0425511	0.81857	0.138879
18981-4	0.0978736	0.625812	0.276314
18988-4	0.0909214	0.67627	0.232808
18995-4	0.0974135	0.677594	0.224993
19005-4	0.0829726	0.692446	0.224582
19006-4	0.0321293	0.844109	0.123761
19007-4	0.102781	0.689055	0.208164
19015-4	0.0854824	0.791466	0.123051
19041-4	0.0935492	0.838693	0.0677582
19042-4	0.0592348	0.69621	0.244556
1918	0.0636434	0.792419	0.143938
19056-4	0.0926459	0.690712	0.216642
19062-4	0.0570459	0.666978	0.275976
19069-4	0.0718206	0.66355	0.264629
19075-4	0.0529664	0.674769	0.272265
19077-4	0.0847728	0.676818	0.238409
19102-4	0.0661382	0.663113	0.270749
19114-4	0.0921844	0.659702	0.248114
19122-4	0.097141	0.662222	0.240637
19127-4	0.0891455	0.716591	0.194264
19139-4	0.141243	0.701012	0.157745
19147-4	0.104462	0.660185	0.235354
19148-4	0.0734166	0.699905	0.226678
19157-4	0.0672225	0.771093	0.161685
6301	0.106111	0.655285	0.238604
19188-4	0.0633906	0.715841	0.220769
19197-4	0.0780544	0.767179	0.154767
19198-4	0.0949789	0.649823	0.255198
19210-4	0.115004	0.642089	0.242907
19213-4	0.09107	0.736314	0.172616
19226-4	0.0942539	0.730499	0.175247
19250-4	0.150641	0.632026	0.217333
19276-4	0.0520237	0.740086	0.20789
19281-4	0.200352	0.59064	0.209009
19285-4	0.0534334	0.794277	0.15229
19308-4	0.085772	0.785097	0.129131
19312-4	0.0763859	0.792535	0.131079
19314-4	0.169018	0.687042	0.14394
19333-4	0.0939858	0.783028	0.122986
19335-4	0.04095	0.752067	0.206983
19336-4	0.262988	0.594251	0.142761
12510	0.0661541	0.80015	0.133695
19345-4	0.0755257	0.794269	0.130205
19355-4	0.131493	0.773013	0.0954939
19359-4	0.105421	0.771914	0.122665
19361-4	0.0806339	0.775097	0.144269
19374-4	0.0694866	0.784634	0.14588
19386-4	0.0997436	0.847624	0.0526322
19392-4	0.0966784	0.871349	0.0319725
19393-4	0.0913335	0.686031	0.222635
19394-4	0.105759	0.793858	0.100384
19410-4	0.0765336	0.804328	0.119139
19425-4	0.0325874	0.76381	0.203603
19426-4	0.0267066	0.765592	0.207701
19435-4	0.115878	0.772634	0.111488
19443-4	0.019852	0.770084	0.210064
16893	0.122206	0.75849	0.119304
19472-4	0.0585721	0.813491	0.127937
19477-4	0.063731	0.809599	0.12667
19489-4	0.0749774	0.810463	0.11456
19493-4	0.0476526	0.819276	0.133072
19495-4	0.123623	0.724143	0.152234
19500-4	0.0684945	0.807577	0.123928
19525-4	0.0726643	0.797578	0.129757
19538-4	0.0709659	0.686414	0.24262
19544-4	0.0177725	0.767582	0.214646
19565-4	0.0927482	0.806931	0.100321
19580-4	0.122085	0.168529	0.709387
19582-4	0.0724503	0.15543	0.77212
19587-4	0.120389	0.169164	0.710446
19588-4	0.0661154	0.151784	0.782101
19589-4	0.125605	0.137824	0.73657
19592-4	0.136364	0.172252	0.691384
19593-4	0.0711714	0.158766	0.770063
19596-4	0.123644	0.191565	0.684792
19598-4	0.385748	0.26865	0.345602
19613-4	0.128572	0.218379	0.653048
19614-4	0.115181	0.1673	0.717519
19615-4	0.0646497	0.159597	0.775753
19616-4	0.0659019	0.161025	0.773073
19621-4	0.391954	0.269623	0.338423
19622-4	0.0681429	0.161525	0.770332
19625-4	0.0797884	0.162604	0.757607
19626-4	0.386549	0.270855	0.342596
19640-4	0.10949	0.18006	0.710449
19642-4	0.104237	0.182134	0.713629
19651-4	0.138967	0.150093	0.71094
19654-4	0.0512122	0.1718	0.776988
24198	0.110269	0.759823	0.129909
19660-4	0.137611	0.228091	0.634298
19663-4	0.124612	0.17314	0.702248
19666-4	0.0666553	0.164323	0.769022
19671-4	0.387734	0.267403	0.344863
19673-4	0.131461	0.161284	0.707255
19679-4	0.102056	0.166909	0.731035
19684-4	0.143401	0.137491	0.719108
19688-4	0.0685007	0.162565	0.768935
19691-4	0.0698062	0.161685	0.768509
19699-4	0.388795	0.272257	0.338948
19701-4	0.120329	0.156068	0.723603
19705-4	0.133299	0.151091	0.71561
19706-4	0.387453	0.272664	0.339883
19709-4	0.136463	0.140893	0.722644
19720-4	0.080624	0.158347	0.761029
19721-4	0.128821	0.149122	0.722057
19726-4	0.141755	0.136291	0.721954
19727-4	0.145637	0.133505	0.720858
19728-4	0.107513	0.177008	0.715479
19729-4	0.117153	0.175842	0.707005
19731-4	0.135815	0.147586	0.716598
19733-4	0.137456	0.13627	0.726274
19734-4	0.38955	0.278155	0.332295
19742-4	0.140245	0.13563	0.724125
19746-4	0.138835	0.143688	0.717477
27485	0.110308	0.773866	0.115826
27851	0.100133	0.772807	0.12706
19767-4	0.0728565	0.157539	0.769604
19770-4	0.140249	0.139379	0.720372
28581	0.106734	0.75679	0.136476
19781-4	0.138603	0.142336	0.719061
19782-4	0.0799735	0.183456	0.736571
19785-4	0.0925262	0.18003	0.727444
19788-4	0.0659433	0.165024	0.769033
19789-4	0.104376	0.182694	0.71293
19793-4	0.144736	0.133658	0.721606
198-4	0.238425	0.258292	0.503283
19805-4	0.0501231	0.161359	0.788518
19806-4	0.399165	0.288408	0.312427
19811-4	0.403926	0.276411	0.319662
19812-4	0.0681803	0.168007	0.763812
19815-4	0.0912588	0.183068	0.725673
19816-4	0.0746359	0.17473	0.750634
19824-4	0.0657144	0.162216	0.77207
19825-4	0.0691468	0.172182	0.758671
19829-4	0.0882788	0.188271	0.723451
19831-4	0.0984678	0.184201	0.717332
19849-4	0.0968839	0.18228	0.720836
31138	0.0355595	0.824536	0.139905
19850-4	0.0709838	0.168083	0.760933
19859-4	0.0990468	0.179634	0.72132
19862-4	0.0729008	0.153724	0.773376
19870-4	0.406131	0.265446	0.328423
19873-4	0.0836268	0.189163	0.72721
32234	0.102558	0.749526	0.147916
19890-4	0.0877339	0.188221	0.724045
19891-4	0.0877867	0.179404	0.73281
19892-4	0.0571819	0.150957	0.791861
19900-4	0.0747969	0.163725	0.761478
19910-4	0.224713	0.527742	0.247545
19912-4	0.0932173	0.184064	0.722719
19913-4	0.087018	0.172195	0.740787
19915-4	0.182611	0.197708	0.619681
19918-4	0.0645696	0.164158	0.771273
19927-4	0.0781878	0.194801	0.727011
19935-4	0.188692	0.193792	0.617516
19937-4	0.0865305	0.193934	0.719535
19938-4	0.1038	0.17867	0.71753
19939-4	0.0268999	0.132096	0.841004
19952-4	0.0341765	0.133779	0.832045
19963-4	0.0967238	0.192271	0.711005
19971-4	0.10867	0.181252	0.710078
19980-4	0.112571	0.183697	0.703732
19991-4	0.085365	0.195579	0.719056
19992-4	0.0297264	0.141513	0.82876
19997-4	0.0427343	0.127882	0.829384
20002-4	0.084651	0.2044	0.710949
20004-4	0.0877776	0.204994	0.707228
20012-4	0.0571716	0.162166	0.780663
20018-4	0.0810462	0.219284	0.69967
20027-4	0.102542	0.190545	0.706913
20028-4	0.0365349	0.134013	0.829452
20032-4	0.100878	0.190324	0.708798
20042-4	0.0925484	0.198194	0.709258
20046-4	0.100313	0.147678	0.752009
20054-4	0.0936512	0.19521	0.711139
20060-4	0.0900884	0.201784	0.708127
20062-4	0.0413284	0.0861274	0.872544
20063-4	0.0466123	0.126913	0.826475
20065-4	0.092333	0.199408	0.708259
20074-4	0.0714866	0.213542	0.714971
20077-4	0.0882702	0.204548	0.707182
20083-4	0.0926961	0.196919	0.710385
20087-4	0.0416393	0.12987	0.828491
20090-4	0.0804673	0.186075	0.733457
20092-4	0.523198	0.271184	0.205618
20093-4	0.162944	0.205311	0.631745
20094-4	0.179563	0.194818	0.625619
20095-4	0.0885831	0.180401	0.731016
20096-4	0.0986746	0.180177	0.721149
20101-4	0.103129	0.184971	0.7119
20108-4	0.0966245	0.201024	0.702351
20109-4	0.0977693	0.193353	0.708878
20112-4	0.0965989	0.193514	0.709887
20114-4	0.0890359	0.205438	0.705526
20117-4	0.0862867	0.178044	0.735669
20118-4	0.0841248	0.19609	0.719786
41000	0.0378099	0.826458	0.135732
20125-4	0.104029	0.206163	0.689809
20128-4	0.132853	0.201043	0.666104
20130-4	0.08962	0.193911	0.716469
20137-4	0.0841684	0.173785	0.742047
20152-4	0.0905244	0.178953	0.730523
20155-4	0.10159	0.19088	0.707529
20158-4	0.111711	0.190385	0.697904
20161-4	0.09714	0.173858	0.729002
20162-4	0.100662	0.19556	0.703778
20166-4	0.108971	0.19199	0.699039
20171-4	0.118554	0.200514	0.680932
20182-4	0.0869303	0.182344	0.730726
20187-4	0.160379	0.256199	0.583422
20197-4	0.164961	0.217398	0.617641
20205-4	0.112636	0.173278	0.714086
20207-4	0.128056	0.218677	0.653267
20212-4	0.123022	0.184854	0.692124
20218-4	0.105653	0.19726	0.697087
44652	0.0302254	0.834751	0.135023
20223-4	0.113265	0.186277	0.700458
20225-4	0.119896	0.181658	0.698446
20227-4	0.115353	0.183037	0.70161
20228-4	0.115488	0.199937	0.684575
20236-4	0.127302	0.169426	0.703272
20239-4	0.118811	0.205351	0.675838
20248-4	0.109714	0.168931	0.721355
20252-4	0.120416	0.177979	0.701605
20258-4	0.0653679	0.22428	0.710353
20260-4	0.111569	0.201248	0.687183
20262-4	0.112416	0.184493	0.703092
20264-4	0.147425	0.241876	0.610698
20270-4	0.108725	0.175437	0.715838
20271-4	0.123412	0.218172	0.658416
20278-4	0.121666	0.179632	0.698702
20279-4	0.112676	0.185154	0.70217
20281-4	0.116636	0.182165	0.701199
20284-4	0.108843	0.177253	0.713904
20287-4	0.132524	0.224473	0.643003
20289-4	0.119814	0.17809	0.702096
20290-4	0.111156	0.193316	0.695529
20298-4	0.114159	0.185936	0.699905
20300-4	0.0824614	0.230835	0.686704
20301-4	0.113543	0.204237	0.68222
20312-4	0.116902	0.174528	0.708569
20322-4	0.11655	0.178553	0.704897
20323-4	0.10952	0.190919	0.699561
20331-4	0.101	0.21122	0.687779
20332-4	0.117894	0.216703	0.665403
20335-4	0.112786	0.204118	0.683096
20345-4	0.126446	0.222901	0.650653
20347-4	0.126647	0.169293	0.70406
20348-4	0.11547	0.180804	0.703726
20354-4	0.115493	0.16623	0.718277
20355-4	0.0944077	0.217316	0.688277
20361-4	0.120341	0.174834	0.704825
20363-4	0.111273	0.186141	0.702585
20365-4	0.114402	0.220109	0.665489
20366-4	0.109901	0.20778	0.682319
20379-4	0.117231	0.175569	0.7072
20383-4	0.124143	0.170327	0.70553
20386-4	0.11434	0.188214	0.697446
50861	0.104584	0.757895	0.137522
20394-4	0.107482	0.209744	0.682774
20401-4	0.104891	0.189707	0.705402
20410-4	0.105361	0.186779	0.70786
20418-4	0.103776	0.175849	0.720375
20420-4	0.107215	0.193478	0.699307
20427-4	0.107486	0.163947	0.728567
52322	0.0718154	0.690638	0.237547
20432-4	0.107759	0.186244	0.705998
20441-4	0.101069	0.171242	0.727689
20446-4	0.0961741	0.164598	0.739228
20448-4	0.13243	0.231861	0.635709
20451-4	0.112875	0.185233	0.701892
20458-4	0.10656	0.227172	0.666267
20460-4	0.0891654	0.168309	0.742526
20463-4	0.0760502	0.180809	0.74314
20465-4	0.116586	0.179698	0.703716
20483-4	0.10703	0.222952	0.670018
20484-4	0.106716	0.228787	0.664497
20488-4	0.102334	0.226832	0.670834
20489-4	0.0990459	0.177849	0.723105
20496-4	0.102035	0.162054	0.735911
20499-4	0.10781	0.183189	0.709001
20502-4	0.108323	0.172611	0.719066
20503-4	0.105553	0.168236	0.726211
20511-4	0.0884164	0.169656	0.741928
20518-4	0.0962301	0.159743	0.744027
20519-4	0.109579	0.185434	0.704986
20531-4	0.100201	0.160732	0.739068
20538-4	0.108605	0.170062	0.721333
20545-4	0.111879	0.223937	0.664184
20546-4	0.10467	0.164838	0.730492
20549-4	0.104371	0.155071	0.740557
20551-4	0.104422	0.164279	0.731298
20555-4	0.104578	0.161695	0.733726
20556-4	0.0709782	0.163745	0.765277
57071	0.0766434	0.698048	0.225309
20562-4	0.112024	0.150509	0.737467
20563-4	0.0929789	0.152797	0.754224
20573-4	0.104984	0.167685	0.727332
20577-4	0.110864	0.174206	0.71493
20579-4	0.0979397	0.223009	0.679052
20583-4	0.104183	0.17386	0.721956
20586-4	0.09404	0.157761	0.748199
20591-4	0.10622	0.151556	0.742224
20592-4	0.104123	0.157111	0.738766
20595-4	0.105541	0.157794	0.736666
206-4	0.153355	0.308601	0.538044
20606-4	0.10342	0.164263	0.732318
20607-4	0.0672441	0.168925	0.763831
20614-4	0.0696361	0.168919	0.761445
20615-4	0.107359	0.15097	0.74167
20618-4	0.0945037	0.152762	0.752734
20620-4	0.0795376	0.162769	0.757693
20622-4	0.102234	0.231064	0.666702
20623-4	0.104876	0.159881	0.735243
20631-4	0.0665779	0.173838	0.759584
20634-4	0.100934	0.16285	0.736216
20641-4	0.0988277	0.148404	0.752768
20642-4	0.110693	0.138775	0.750532
20645-4	0.100111	0.160117	0.739773
20646-4	0.0773705	0.154227	0.768402
20648-4	0.107015	0.155214	0.73777
20654-4	0.109966	0.150909	0.739125
20655-4	0.110564	0.156721	0.732715
20662-4	0.0718325	0.164179	0.763989
20668-4	0.0993596	0.147693	0.752948
20679-4	0.0998644	0.144899	0.755236
20684-4	0.105715	0.154497	0.739788
20687-4	0.109937	0.152657	0.737406
20690-4	0.110803	0.159171	0.730025
20691-4	0.0677062	0.168827	0.763467
20692-4	0.0952659	0.138648	0.766086
20693-4	0.0782533	0.165611	0.756136
20699-4	0.101391	0.136557	0.762053
20700-4	0.086101	0.167652	0.746247
20704-4	0.0852885	0.138588	0.776124
20706-4	0.0926913	0.140484	0.766825
20708-4	0.0920929	0.139506	0.768401
20709-4	0.0781102	0.167836	0.754054
20711-4	0.0990371	0.13282	0.768143
20715-4	0.0885775	0.140797	0.770626
20716-4	0.0694526	0.161355	0.769192
20719-4	0.0932351	0.151326	0.755439
20725-4	0.0865907	0.161827	0.751583
20727-4	0.101204	0.152282	0.746513
20728-4	0.0741569	0.171873	0.75397
20731-4	0.0751872	0.165762	0.759051
20734-4	0.0994649	0.133081	0.767454
20735-4	0.0998112	0.139057	0.761132
20738-4	0.0740998	0.167331	0.75857
20743-4	0.106488	0.133563	0.759949
20745-4	0.0967686	0.153522	0.749709
20746-4	0.101738	0.143933	0.754328
20749-4	0.0908633	0.134058	0.775079
20756-4	0.0791453	0.149598	0.771257
20757-4	0.118274	0.177272	0.704453
20774-4	0.0975844	0.127266	0.77515
65106	0.10313	0.753177	0.143693
20781-4	0.0871091	0.1408	0.772091
20791-4	0.114125	0.187925	0.69795
20793-4	0.0971072	0.128109	0.774784
20794-4	0.0940288	0.13238	0.773592
20803-4	0.0998109	0.135971	0.764218
20814-4	0.0956389	0.122852	0.78151
20816-4	0.0893394	0.14055	0.770111
20820-4	0.126223	0.183792	0.689985
20823-4	0.129543	0.175205	0.695253
20853-4	0.096227	0.139189	0.764584
20858-4	0.144652	0.221667	0.63368
20860-4	0.0958034	0.136949	0.767247
69489	0.0908291	0.770334	0.138837
20919-4	0.104432	0.173912	0.721656
71315	0.0916572	0.720078	0.188264
20950-4	0.137936	0.17455	0.687514
20987-4	0.13681	0.227434	0.635756
20988-4	0.118193	0.256825	0.624982
20990-4	0.125084	0.240577	0.634339
20991-4	0.120636	0.246639	0.632725
21009-4	0.12166	0.166284	0.712056
21013-4	0.107264	0.308739	0.583997
21022-4	0.125099	0.240218	0.634683
21049-4	0.115165	0.173328	0.711507
75332	0.124839	0.752403	0.122758
21061-4	0.121925	0.218674	0.6594
21094-4	0.108447	0.17217	0.719383
21099-4	0.145496	0.210613	0.643891
21102-4	0.0802316	0.281546	0.638223
21108-4	0.140733	0.240798	0.618469
21120-4	0.0919555	0.266818	0.641226
21138-4	0.100216	0.252956	0.646828
78254	0.114994	0.748412	0.136594
21145-4	0.0957005	0.317942	0.586357
21149-4	0.0839795	0.26415	0.651871
21162-4	0.132788	0.243994	0.623218
21172-4	0.0971659	0.311115	0.591719
21176-4	0.155014	0.20219	0.642795
21177-4	0.094763	0.308547	0.59669
21187-4	0.0926833	0.25734	0.649976
21209-4	0.0899252	0.304551	0.605524
80811	0.0320573	0.8887	0.0792426
21227-4	0.113619	0.168971	0.71741
21231-4	0.0820175	0.272373	0.64561
21233-4	0.148047	0.204825	0.647127
21238-4	0.156183	0.210934	0.632884
21249-4	0.099068	0.222034	0.678898
21252-4	0.0812417	0.278066	0.640693
21256-4	0.0800154	0.300528	0.619457
21265-4	0.12416	0.264052	0.611788
21271-4	0.136989	0.239664	0.623347
21277-4	0.0769593	0.29514	0.627901
21289-4	0.137972	0.223501	0.638527
21290-4	0.119212	0.165205	0.715583
21294-4	0.116356	0.16827	0.715374
21297-4	0.11566	0.16073	0.723611
21310-4	0.130461	0.245426	0.624113
21312-4	0.0805552	0.285348	0.634097
21317-4	0.132655	0.253734	0.613611
21323-4	0.0782205	0.284309	0.637471
21327-4	0.0791702	0.265286	0.655544
21331-4	0.131615	0.23892	0.629465
21332-4	0.0982444	0.285509	0.616247
21337-4	0.0940718	0.291148	0.61478
21340-4	0.134325	0.231691	0.633984
21341-4	0.0800647	0.254298	0.665637
21342-4	0.133938	0.254179	0.611883
21345-4	0.132902	0.138624	0.728474
21349-4	0.0808656	0.292583	0.626551
21357-4	0.131218	0.247496	0.621285
21358-4	0.108484	0.283629	0.607887
21363-4	0.130718	0.247823	0.621459
21367-4	0.098362	0.279913	0.621725
21387-4	0.130468	0.132357	0.737175
21390-4	0.0808123	0.267655	0.651533
21392-4	0.0874078	0.270591	0.642001
21393-4	0.123614	0.133487	0.742899
21398-4	0.125073	0.278136	0.596791
87751	0.0599692	0.697087	0.242944
21406-4	0.0983813	0.287406	0.614212
21412-4	0.0870653	0.265779	0.647156
21413-4	0.113818	0.170308	0.715874
21423-4	0.0905902	0.288847	0.620563
21432-4	0.119535	0.137763	0.742702
21433-4	0.115238	0.134385	0.750378
21434-4	0.119297	0.161172	0.71953
21439-4	0.141048	0.125123	0.733829
89212	0.122632	0.7733	0.104068
21443-4	0.122383	0.139237	0.738379
21447-4	0.101188	0.275497	0.623315
21448-4	0.125003	0.149572	0.725424
21450-4	0.0906029	0.269402	0.639995
21455-4	0.0898537	0.283104	0.627043
21457-4	0.0854183	0.271204	0.643378
90307	0.0995326	0.767047	0.13342
21480-4	0.0846792	0.27678	0.638541
21486-4	0.079665	0.287949	0.632386
91038	0.0416036	0.835276	0.12312
21490-4	0.102314	0.273017	0.624669
21491-4	0.0906357	0.280014	0.629351
21504-4	0.119872	0.130417	0.749711
21516-4	0.103666	0.271143	0.62519
21517-4	0.112883	0.131003	0.756115
21519-4	0.100312	0.269624	0.630064
21536-4	0.080958	0.278329	0.640713
21543-4	0.0975145	0.276423	0.626062
21545-4	0.0892481	0.279376	0.631376
21547-4	0.0804849	0.276842	0.642673
21558-4	0.0923285	0.302175	0.605497
21571-4	0.473342	0.29392	0.232738
21576-4	0.0855324	0.291837	0.622631
94325	0.114107	0.749374	0.136519
21581-4	0.0830433	0.273018	0.643939
21587-4	0.0993158	0.276546	0.624138
21598-4	0.0996451	0.276228	0.624127
21612-4	0.0919317	0.279432	0.628637
21623-4	0.0924534	0.273294	0.634252
21636-4	0.467889	0.286594	0.245517
21640-4	0.466102	0.29801	0.235888
21644-4	0.104717	0.268848	0.626435
21645-4	0.0946777	0.278012	0.627311
21648-4	0.0947539	0.234554	0.670692
21649-4	0.470754	0.290341	0.238905
21673-4	0.0920794	0.280575	0.627345
21690-4	0.0944834	0.276994	0.628523
21694-4	0.105786	0.249295	0.644919
21697-4	0.103588	0.2631	0.633312
21702-4	0.45364	0.306769	0.239591
21712-4	0.459737	0.288931	0.251332
21716-4	0.452531	0.296043	0.251427
21725-4	0.453238	0.292628	0.254134
21731-4	0.0969218	0.278848	0.624231
21748-4	0.454933	0.299996	0.24507
21756-4	0.109903	0.250794	0.639303
21759-4	0.115893	0.240554	0.643553
21767-4	0.105443	0.270126	0.624431
21776-4	0.0161383	0.351283	0.632579
21780-4	0.129016	0.17946	0.691524
21784-4	0.130212	0.176588	0.6932
21795-4	0.126036	0.177738	0.696226
21796-4	0.437667	0.30236	0.259973
21801-4	0.205036	0.200063	0.594901
21805-4	0.451476	0.299205	0.249318
21813-4	0.382083	0.223588	0.394328
21817-4	0.218256	0.211263	0.57048
21818-4	0.113636	0.257732	0.628631
21824-4	0.390744	0.222444	0.386813
21825-4	0.0975906	0.295546	0.606863
21829-4	0.441836	0.301418	0.256747
21835-4	0.132214	0.179086	0.6887
21841-4	0.392105	0.212045	0.39585
21844-4	0.434593	0.303251	0.262157
21846-4	0.370949	0.225229	0.403822
21855-4	0.122766	0.174528	0.702706
21859-4	0.207509	0.208032	0.584459
21866-4	0.113966	0.17974	0.706294
21879-4	0.120129	0.178682	0.701189
21883-4	0.430195	0.297836	0.271968
21886-4	0.426618	0.308217	0.265165
21891-4	0.133223	0.172965	0.693812
21893-4	0.142277	0.229676	0.628047
21894-4	0.1138	0.294298	0.591902
21895-4	0.10402	0.156167	0.739814
21896-4	0.117857	0.256015	0.626128
21901-4	0.215916	0.203146	0.580938
21902-4	0.114658	0.182249	0.703093
21908-4	0.114404	0.295963	0.589633
21909-4	0.121797	0.177193	0.70101
21910-4	0.383254	0.240658	0.376088
21912-4	0.42341	0.306992	0.269598
21922-4	0.417805	0.309149	0.273046
21924-4	0.124835	0.242931	0.632234
21940-4	0.428888	0.303499	0.267613
21941-4	0.113538	0.268446	0.618016
21952-4	0.386634	0.232017	0.381349
21954-4	0.402994	0.315079	0.281927
21957-4	0.116274	0.182333	0.701393
21960-4	0.367308	0.21643	0.416261
21974-4	0.125729	0.277717	0.596554
21975-4	0.116445	0.176355	0.707199
21978-4	0.420261	0.307176	0.272563
21992-4	0.124895	0.172522	0.702582
21993-4	0.372013	0.251793	0.376194
21994-4	0.127006	0.289598	0.583395
21997-4	0.188931	0.205113	0.605955
21998-4	0.101346	0.182713	0.71594
22004-4	0.177406	0.211238	0.611355
22013-4	0.408612	0.316701	0.274687
22017-4	0.371219	0.314604	0.314177
22018-4	0.40707	0.31804	0.27489
22020-4	0.407839	0.320831	0.271331
22021-4	0.162937	0.215289	0.621773
22024-4	0.147439	0.227642	0.624919
22025-4	0.174547	0.215491	0.609962
22026-4	0.105998	0.185855	0.708147
22036-4	0.12092	0.290663	0.588417
22044-4	0.372541	0.31908	0.308379
22048-4	0.12297	0.298285	0.578745
22054-4	0.400334	0.320528	0.279138
22057-4	0.109706	0.310059	0.580236
22067-4	0.169157	0.212048	0.618796
22070-4	0.172164	0.208348	0.619488
22071-4	0.16965	0.214356	0.615994
22075-4	0.170977	0.213167	0.615856
22089-4	0.168954	0.211925	0.619121
22095-4	0.114449	0.298021	0.587531
22105-4	0.159563	0.209546	0.630891
22110-4	0.111333	0.301196	0.587471
22117-4	0.118083	0.300133	0.581785
22123-4	0.122859	0.292649	0.584492
22129-4	0.349436	0.3296	0.320965
22144-4	0.337618	0.337577	0.324806
22146-4	0.378323	0.32091	0.300768
22149-4	0.125624	0.301753	0.572623
22153-4	0.122039	0.298946	0.579015
22178-4	0.347935	0.222555	0.429509
22183-4	0.0941521	0.261539	0.644309
22185-4	0.121607	0.299342	0.579051
22192-4	0.119461	0.300174	0.580365
22200-4	0.356461	0.330284	0.313255
22207-4	0.337633	0.225303	0.437064
117335	0.041116	0.8318	0.127084
22237-4	0.33728	0.233565	0.429155
22251-4	0.106228	0.254613	0.639159
22256-4	0.327438	0.343016	0.329546
22269-4	0.320081	0.360978	0.31894
22271-4	0.343959	0.220707	0.435334
22275-4	0.349662	0.213085	0.437253
22279-4	0.323358	0.347033	0.329609
22289-4	0.313059	0.362042	0.3249
22301-4	0.310199	0.365702	0.3241
22306-4	0.109882	0.300569	0.589549
22312-4	0.315364	0.356825	0.327811
22320-4	0.109398	0.308392	0.58221
22335-4	0.305814	0.367679	0.326507
22338-4	0.319535	0.348125	0.33234
22353-4	0.309333	0.348649	0.342018
22354-4	0.33526	0.286913	0.377826
22370-4	0.335074	0.30698	0.357946
22376-4	0.316316	0.346985	0.336698
22381-4	0.0964009	0.294099	0.6095
22390-4	0.299085	0.37155	0.329365
22392-4	0.340639	0.283684	0.375677
22398-4	0.0623488	0.248974	0.688677
22400-4	0.114509	0.33343	0.55206
22419-4	0.301434	0.368807	0.329758
22430-4	0.0802798	0.238614	0.681107
22439-4	0.315524	0.34978	0.334697
22451-4	0.0895627	0.311761	0.598676
22457-4	0.301455	0.370995	0.32755
22471-4	0.297278	0.370466	0.332257
22473-4	0.299397	0.374133	0.32647
22475-4	0.0878194	0.281259	0.630922
22478-4	0.120941	0.333941	0.545118
22479-4	0.0801989	0.305552	0.61425
22483-4	0.126995	0.3279	0.545105
22491-4	0.12752	0.331588	0.540892
22505-4	0.122992	0.327487	0.549521
128292	0.109295	0.762896	0.127809
22513-4	0.116502	0.337435	0.546063
22519-4	0.0668343	0.267432	0.665734
22525-4	0.303385	0.363723	0.332892
22526-4	0.111874	0.236246	0.65188
22528-4	0.308666	0.359637	0.331697
22536-4	0.121297	0.330345	0.548358
22542-4	0.31107	0.359196	0.329733
22546-4	0.126667	0.334366	0.538967
22560-4	0.117753	0.338332	0.543915
22561-4	0.0889325	0.295381	0.615687
22564-4	0.121032	0.330135	0.548833
22577-4	0.124059	0.337736	0.538205
22580-4	0.0855441	0.295957	0.618499
22596-4	0.128364	0.331927	0.539709
22600-4	0.128126	0.332288	0.539586
22601-4	0.0873681	0.298748	0.613884
22615-4	0.0908391	0.301943	0.607218
22617-4	0.0884604	0.2953	0.61624
22628-4	0.133972	0.172756	0.693273
22637-4	0.150354	0.166592	0.683054
22641-4	0.136674	0.220283	0.643043
22645-4	0.134002	0.159881	0.706117
22647-4	0.108613	0.219635	0.671752
22654-4	0.384125	0.271362	0.344513
22665-4	0.105318	0.169421	0.72526
22671-4	0.127349	0.173789	0.698862
22683-4	0.137996	0.13959	0.722414
22688-4	0.100636	0.183162	0.716202
227-4	0.21706	0.267342	0.515598
22700-4	0.147998	0.127402	0.7246
22707-4	0.0543509	0.156049	0.7896
22710-4	0.0545107	0.149769	0.795721
22711-4	0.188399	0.162245	0.649356
22716-4	0.0508682	0.142715	0.806417
22719-4	0.0668912	0.173053	0.760056
22720-4	0.0542361	0.145583	0.800181
22729-4	0.0588716	0.150642	0.790486
22731-4	0.0462006	0.132543	0.821257
22735-4	0.0377085	0.130581	0.83171
136693	0.11554	0.728157	0.156303
22746-4	0.0405055	0.138936	0.820559
22748-4	0.042869	0.136269	0.820862
137058	0.118898	0.728163	0.152939
137424	0.102535	0.787232	0.110233
22767-4	0.0993944	0.190625	0.709981
22772-4	0.0382947	0.129624	0.832081
22782-4	0.0908417	0.201687	0.707472
22783-4	0.0884187	0.180559	0.731023
22796-4	0.0893083	0.200332	0.71036
22797-4	0.0888912	0.19583	0.715279
22827-4	0.0816989	0.190643	0.727659
22828-4	0.1139	0.203673	0.682427
22833-4	0.0809817	0.188351	0.730667
22837-4	0.11146	0.175525	0.713014
22844-4	0.118463	0.18293	0.698607
22848-4	0.10803	0.175727	0.716243
22850-4	0.109506	0.177486	0.713008
22874-4	0.0848298	0.170901	0.744269
22879-4	0.0888489	0.163461	0.74769
22880-4	0.0876711	0.165056	0.747273
22903-4	0.0965457	0.157065	0.746389
22922-4	0.0842974	0.15769	0.758012
22947-4	0.110251	0.146984	0.742765
22949-4	0.125755	0.177296	0.696949
22966-4	0.0961074	0.174052	0.729841
22985-4	0.146005	0.159785	0.69421
22986-4	0.13599	0.160164	0.703846
22991-4	0.131505	0.162433	0.706061
22994-4	0.149921	0.217139	0.63294
22995-4	0.144829	0.218107	0.637064
22997-4	0.136097	0.215946	0.647957
45770	0.233597	0.217038	0.549365
146189	0.0788447	0.799842	0.121314
23003-4	0.139382	0.20848	0.652137
23004-4	0.137021	0.202546	0.660433
23008-4	0.124387	0.240884	0.634729
23011-4	0.146349	0.157501	0.69615
23012-4	0.125152	0.264483	0.610365
23015-4	0.12528	0.245153	0.629566
23017-4	0.111116	0.173055	0.71583
23030-4	0.114139	0.285031	0.60083
23033-4	0.112547	0.29334	0.594113
23036-4	0.105027	0.301645	0.593328
23037-4	0.108626	0.307259	0.584115
23044-4	0.103899	0.314339	0.581763
23055-4	0.103852	0.308639	0.587508
23057-4	0.076437	0.280586	0.642977
23059-4	0.0775252	0.306657	0.615818
23063-4	0.119245	0.252664	0.628092
23074-4	0.0879526	0.25957	0.652478
23088-4	0.148816	0.210944	0.640239
23097-4	0.116997	0.165243	0.71776
23134-4	0.121407	0.127881	0.750712
151302	0.103168	0.749622	0.14721
23143-4	0.0899449	0.279399	0.630656
23188-4	0.216397	0.204461	0.579142
153128	0.0457922	0.80059	0.153617
23194-4	0.37481	0.215473	0.409717
23201-4	0.12761	0.179191	0.6932
23204-4	0.378378	0.219673	0.401949
23205-4	0.422482	0.326894	0.250624
23226-4	0.420241	0.310183	0.269576
23229-4	0.201029	0.207187	0.591784
23230-4	0.223135	0.201311	0.575554
23232-4	0.198026	0.211741	0.590233
23233-4	0.392252	0.310712	0.297036
23234-4	0.347639	0.20913	0.443231
23240-4	0.213723	0.207424	0.578853
23252-4	0.408155	0.323543	0.268302
23289-4	0.350352	0.220229	0.429419
23291-4	0.328471	0.356214	0.315315
23296-4	0.359704	0.242695	0.397601
23300-4	0.112636	0.298212	0.589153
23313-4	0.327993	0.324003	0.348004
23337-4	0.300947	0.371754	0.327298
23338-4	0.0937718	0.291368	0.614861
23339-4	0.0942784	0.304104	0.601618
23341-4	0.303102	0.370025	0.326874
23348-4	0.0882353	0.299628	0.612137
158972	0.0716236	0.807313	0.121063
23351-4	0.0772471	0.244182	0.678571
23353-4	0.12961	0.326204	0.544186
23355-4	0.0872431	0.297841	0.614915
23356-4	0.13148	0.332486	0.536034
159338	0.127559	0.719203	0.153238
23360-4	0.140543	0.328824	0.530633
23398-4	0.0908265	0.296081	0.613093
23403-4	0.164436	0.434616	0.400948
23404-4	0.17498	0.444077	0.380943
23407-4	0.229286	0.384347	0.386367
161164	0.0806325	0.780553	0.138814
23415-4	0.169541	0.433142	0.397316
23418-4	0.209732	0.395562	0.394706
23421-4	0.233424	0.309051	0.457525
23434-4	0.159814	0.459357	0.380829
23436-4	0.157474	0.426493	0.416033
23439-4	0.227248	0.381467	0.391285
23440-4	0.197571	0.41704	0.385389
23441-4	0.156351	0.436225	0.407423
23442-4	0.155632	0.453765	0.390603
23448-4	0.17858	0.439735	0.381685
23451-4	0.22604	0.38409	0.38987
23452-4	0.167602	0.430914	0.401485
23453-4	0.174833	0.453061	0.372106
23455-4	0.190251	0.400597	0.409152
23459-4	0.238634	0.381589	0.379778
23461-4	0.159338	0.452324	0.388337
23466-4	0.145576	0.435055	0.419369
23468-4	0.167111	0.4385	0.394389
23476-4	0.233696	0.378276	0.388028
23477-4	0.242099	0.368942	0.38896
23478-4	0.198653	0.403447	0.3979
23483-4	0.175137	0.437723	0.38714
23484-4	0.174411	0.446464	0.379125
23486-4	0.184831	0.432849	0.38232
23488-4	0.233837	0.313195	0.452968
23489-4	0.139591	0.434924	0.425484
23490-4	0.193149	0.418519	0.388331
23491-4	0.228985	0.30968	0.461335
23493-4	0.174011	0.438499	0.38749
23501-4	0.156435	0.44564	0.397925
23504-4	0.167103	0.439076	0.393821
23505-4	0.202588	0.396663	0.400749
23506-4	0.157409	0.445	0.397591
23511-4	0.170723	0.43078	0.398497
23522-4	0.175137	0.431596	0.393267
23525-4	0.149148	0.430797	0.420055
23532-4	0.14986	0.450416	0.399724
23545-4	0.177355	0.430124	0.392521
23555-4	0.151642	0.441623	0.406735
23556-4	0.16582	0.439331	0.394848
23557-4	0.159535	0.446638	0.393827
23561-4	0.172494	0.434202	0.393304
23564-4	0.163405	0.44394	0.392655
23565-4	0.218788	0.314235	0.466977
23570-4	0.156887	0.441771	0.401342
23573-4	0.149651	0.442059	0.40829
167373	0.109301	0.736693	0.154006
23587-4	0.162323	0.444546	0.393131
23588-4	0.141703	0.424956	0.433341
23589-4	0.261192	0.356333	0.382476
23596-4	0.15382	0.437321	0.408859
23597-4	0.195618	0.358282	0.4461
23601-4	0.16328	0.442255	0.394465
23606-4	0.252801	0.374523	0.372676
23611-4	0.192819	0.449853	0.357328
168834	0.105019	0.744568	0.150413
23622-4	0.253957	0.369976	0.376067
23629-4	0.212418	0.41546	0.372122
23636-4	0.14624	0.440693	0.413067
23639-4	0.137304	0.417482	0.445214
23645-4	0.162949	0.444109	0.392943
23651-4	0.158602	0.447137	0.394262
23655-4	0.147894	0.443485	0.408621
23658-4	0.251739	0.361729	0.386532
23661-4	0.155957	0.445768	0.398275
23663-4	0.146327	0.443396	0.410276
23675-4	0.153053	0.44004	0.406907
23677-4	0.143075	0.442026	0.414898
23681-4	0.253198	0.360968	0.385834
171391	0.03139	0.753456	0.215154
23691-4	0.194614	0.415841	0.389545
23696-4	0.136395	0.420686	0.442918
23698-4	0.15265	0.445687	0.401663
23701-4	0.15128	0.449868	0.398851
23702-4	0.149587	0.449466	0.400947
23706-4	0.147227	0.440507	0.412266
23708-4	0.136568	0.445518	0.417914
23709-4	0.141207	0.441539	0.417254
23719-4	0.146407	0.437756	0.415836
23724-4	0.150277	0.443189	0.406534
23726-4	0.238031	0.411747	0.350222
23727-4	0.142569	0.389543	0.467888
23729-4	0.140315	0.434067	0.425618
23732-4	0.195833	0.431093	0.373075
23733-4	0.14461	0.41891	0.43648
23737-4	0.151637	0.442264	0.406099
23744-4	0.129442	0.445824	0.424734
23745-4	0.137926	0.452062	0.410012
23750-4	0.135543	0.416274	0.448183
23759-4	0.124962	0.441411	0.433627
23762-4	0.137333	0.444662	0.418005
23763-4	0.143893	0.413453	0.442654
23764-4	0.143191	0.446003	0.410806
23778-4	0.131765	0.454047	0.414189
23779-4	0.194194	0.433177	0.372629
23784-4	0.14932	0.345265	0.505415
23785-4	0.210596	0.399032	0.390372
23787-4	0.196784	0.433875	0.369341
23795-4	0.137122	0.411138	0.45174
23797-4	0.198563	0.427411	0.374026
23802-4	0.117961	0.439738	0.442301
23807-4	0.153776	0.415477	0.430747
23810-4	0.134432	0.447184	0.418384
23811-4	0.165833	0.433634	0.400533
23813-4	0.125647	0.450764	0.423589
[truncated: 11,954 more rows]

## Sheet: S19
Supplementary Table S19: Estimations of gene module activities of neutrophil in the LUAD dataset
Neutrophil	Neutrophlil Module1	Neutrophlil Module2
10005-4	0.730489	0.269511
10024-4	0.717005	0.282995
10029-4	0.713784	0.286216
1003-4	0.369255	0.630745
10031-4	0.701869	0.298131
10035-4	0.710509	0.289491
10077-4	0.712032	0.287968
10083-4	0.749491	0.250509
10119-4	0.759982	0.240018
10125-4	0.745237	0.254763
10126-4	0.738794	0.261206
10133-4	0.713613	0.286387
10138-4	0.746631	0.253369
10140-4	0.701466	0.298534
10146-4	0.739595	0.260405
10150-4	0.759177	0.240823
10162-4	0.743399	0.256601
10173-4	0.723237	0.276763
10186-4	0.74293	0.25707
10187-4	0.72425	0.27575
10188-4	0.740219	0.259781
10191-4	0.686084	0.313916
10204-4	0.703631	0.29637
10215-4	0.730195	0.269805
10224-4	0.737094	0.262906
10230-4	0.729214	0.270786
10233-4	0.685816	0.314184
10270-4	0.743717	0.256283
103-4	0.266949	0.733051
1030-4	0.366543	0.633457
10308-4	0.735836	0.264164
10317-4	0.76038	0.23962
10325-4	0.711229	0.28877
1033-4	0.381762	0.618239
10331-4	0.745574	0.254426
10332-4	0.746207	0.253793
1034-4	0.383983	0.616017
10341-4	0.752328	0.247672
10350-4	0.680684	0.319316
10361-4	0.734148	0.265852
10368-4	0.739849	0.260151
10370-4	0.756596	0.243404
10372-4	0.767562	0.232438
10378-4	0.758258	0.241742
10379-4	0.746953	0.253047
10406-4	0.734456	0.265544
10421-4	0.755752	0.244248
10426-4	0.66457	0.33543
10429-4	0.745187	0.254813
10446-4	0.74959	0.25041
10463-4	0.734383	0.265618
1048-4	0.396914	0.603086
10486-4	0.756856	0.243144
1050-4	0.370522	0.629479
1052-4	0.34195	0.65805
10540-4	0.734309	0.265691
10548-4	0.746296	0.253704
10574-4	0.578594	0.421406
10593-4	0.570458	0.429542
10594-4	0.695956	0.304044
1061-4	0.367315	0.632685
10663-4	0.702638	0.297362
10686-4	0.682081	0.317919
10690-4	0.683728	0.316272
10700-4	0.693172	0.306829
1072-4	0.721827	0.278173
10724-4	0.77748	0.22252
10738-4	0.650003	0.349997
10760-4	0.772927	0.227072
10763-4	0.72548	0.27452
1079-4	0.396905	0.603095
10825-4	0.703945	0.296055
1083-4	0.41497	0.58503
10835-4	0.781762	0.218238
1084-4	0.379037	0.620963
10872-4	0.731725	0.268275
10877-4	0.712994	0.287006
10879-4	0.703827	0.296173
10880-4	0.778248	0.221752
1089-4	0.358536	0.641464
10892-4	0.70442	0.29558
10898-4	0.632753	0.367247
10899-4	0.781623	0.218377
1090-4	0.353944	0.646057
10900-4	0.726911	0.273089
10925-4	0.630288	0.369712
1094-4	0.378104	0.621896
10941-4	0.727184	0.272816
10948-4	0.69701	0.30299
10950-4	0.782826	0.217174
10952-4	0.720853	0.279148
10981-4	0.689103	0.310897
10982-4	0.696156	0.303844
10988-4	0.709755	0.290245
11013-4	0.694537	0.305463
11083-4	0.695844	0.304156
11086-4	0.591394	0.408606
11145-4	0.666469	0.333531
11190-4	0.69675	0.30325
112-4	0.313316	0.686684
11203-4	0.697933	0.302067
1122-4	0.392549	0.607451
11231-4	0.620208	0.379792
1124-4	0.505557	0.494443
11246-4	0.656342	0.343658
11249-4	0.674817	0.325183
11265-4	0.634405	0.365595
11271-4	0.640929	0.359071
11277-4	0.64204	0.35796
11281-4	0.673296	0.326704
11291-4	0.670808	0.329192
11292-4	0.633035	0.366965
11293-4	0.684326	0.315674
11301-4	0.677156	0.322844
11305-4	0.684918	0.315082
11324-4	0.586665	0.413335
11327-4	0.645903	0.354097
11328-4	0.645444	0.354556
11337-4	0.679741	0.320259
11338-4	0.632056	0.367944
11339-4	0.637984	0.362016
11347-4	0.640297	0.359703
1136-4	0.481102	0.518898
11361-4	0.638279	0.361721
11363-4	0.650164	0.349836
11374-4	0.65296	0.34704
11378-4	0.629651	0.370349
11391-4	0.667345	0.332656
11401-4	0.659368	0.340632
11426-4	0.674929	0.325071
11433-4	0.634582	0.365418
11434-4	0.635783	0.364217
11438-4	0.671186	0.328814
11443-4	0.670446	0.329554
11446-4	0.735942	0.264058
11447-4	0.666739	0.333261
11455-4	0.68462	0.31538
11467-4	0.639489	0.360511
11468-4	0.698666	0.301334
11469-4	0.738873	0.261127
11485-4	0.671229	0.328771
11487-4	0.676033	0.323967
11489-4	0.66415	0.33585
11496-4	0.701902	0.298098
11504-4	0.684111	0.315889
1151-4	0.354409	0.645591
11517-4	0.641821	0.358179
1152-4	0.356553	0.643447
11530-4	0.739481	0.260519
11531-4	0.646811	0.35319
11534-4	0.654735	0.345265
11535-4	0.641892	0.358108
11539-4	0.664042	0.335958
11540-4	0.690383	0.309617
11541-4	0.645353	0.354647
11547-4	0.873709	0.126291
11549-4	0.671284	0.328716
11551-4	0.63293	0.367069
11553-4	0.678247	0.321753
11555-4	0.6172	0.3828
11557-4	0.644716	0.355284
1156-4	0.385262	0.614738
11587-4	0.649359	0.350641
116-4	0.313709	0.686291
11603-4	0.63422	0.36578
1161-4	0.390301	0.609699
11620-4	0.683729	0.316271
11625-4	0.668089	0.331911
11628-4	0.688626	0.311374
11629-4	0.655182	0.344818
11633-4	0.746088	0.253912
1164-4	0.354601	0.645399
1165-4	0.396532	0.603468
11673-4	0.653723	0.346277
11675-4	0.65018	0.34982
11676-4	0.616734	0.383266
11679-4	0.732478	0.267522
11683-4	0.666971	0.333029
11684-4	0.618565	0.381435
11695-4	0.641807	0.358193
11708-4	0.620974	0.379026
1171-4	0.382342	0.617658
11711-4	0.623157	0.376843
11712-4	0.707168	0.292832
11732-4	0.648976	0.351024
11740-4	0.743879	0.256121
11741-4	0.846549	0.153451
11744-4	0.652001	0.347999
11748-4	0.657577	0.342423
11766-4	0.632545	0.367455
11783-4	0.648558	0.351442
11788-4	0.755489	0.244511
1179-4	0.3554	0.6446
11790-4	0.650458	0.349542
11795-4	0.661426	0.338574
11796-4	0.628957	0.371043
11805-4	0.623098	0.376902
11806-4	0.710805	0.289195
11808-4	0.655305	0.344695
11817-4	0.631252	0.368748
11819-4	0.647715	0.352285
1182-4	0.351986	0.648014
11825-4	0.641341	0.358659
11838-4	0.651937	0.348063
11848-4	0.645119	0.354881
11853-4	0.650593	0.349407
11857-4	0.655295	0.344705
11861-4	0.706494	0.293506
11871-4	0.623704	0.376296
11891-4	0.655347	0.344653
11903-4	0.640238	0.359762
11904-4	0.621503	0.378497
11912-4	0.642294	0.357706
11913-4	0.653639	0.346361
11916-4	0.699095	0.300905
1192-4	0.358477	0.641523
11939-4	0.65694	0.34306
1194-4	0.360106	0.639894
11942-4	0.617353	0.382647
11943-4	0.707061	0.292939
11945-4	0.612237	0.387763
11958-4	0.651903	0.348097
11966-4	0.597502	0.402498
11969-4	0.607651	0.392349
11979-4	0.609756	0.390244
11980-4	0.663748	0.336252
11982-4	0.654873	0.345127
11983-4	0.670123	0.329877
11995-4	0.643883	0.356117
12007-4	0.68614	0.31386
12009-4	0.639177	0.360823
12014-4	0.636093	0.363907
12016-4	0.654408	0.345592
12024-4	0.680418	0.319582
12029-4	0.662383	0.337617
12055-4	0.711327	0.288673
12062-4	0.653007	0.346993
12063-4	0.699321	0.300679
12064-4	0.613402	0.386598
1208-4	0.355304	0.644697
12081-4	0.66884	0.33116
12095-4	0.619176	0.380824
12103-4	0.660004	0.339996
12107-4	0.582395	0.417605
12113-4	0.652532	0.347468
12119-4	0.692577	0.307423
12121-4	0.652536	0.347465
12136-4	0.622267	0.377733
1214-4	0.355795	0.644205
12146-4	0.575459	0.424541
12156-4	0.570386	0.429614
12159-4	0.6515	0.3485
12181-4	0.60654	0.39346
12187-4	0.708455	0.291545
12188-4	0.569802	0.430198
12189-4	0.605678	0.394322
12205-4	0.615164	0.384836
12210-4	0.61706	0.38294
12212-4	0.600444	0.399556
12213-4	0.60372	0.39628
12214-4	0.601802	0.398198
12220-4	0.570765	0.429235
12230-4	0.596914	0.403086
12232-4	0.627937	0.372063
1224-4	0.491056	0.508944
12241-4	0.622898	0.377102
12247-4	0.60748	0.39252
12249-4	0.637854	0.362146
12257-4	0.562576	0.437424
12259-4	0.653479	0.346521
12260-4	0.575168	0.424831
12263-4	0.64053	0.35947
12271-4	0.628486	0.371514
12274-4	0.618105	0.381895
12276-4	0.616734	0.383266
1229-4	0.602144	0.397856
12302-4	0.595968	0.404032
12304-4	0.623938	0.376062
12305-4	0.561804	0.438196
12315-4	0.633037	0.366963
12325-4	0.616969	0.383031
12336-4	0.662726	0.337274
12345-4	0.663715	0.336285
12347-4	0.617493	0.382507
12348-4	0.56136	0.43864
12350-4	0.590249	0.409751
12352-4	0.61433	0.38567
12354-4	0.678248	0.321752
12355-4	0.599603	0.400397
12356-4	0.627887	0.372113
12364-4	0.634304	0.365696
12370-4	0.600113	0.399887
12372-4	0.624768	0.375232
12377-4	0.621643	0.378357
1238-4	0.366184	0.633816
12385-4	0.562874	0.437126
12389-4	0.564054	0.435946
12398-4	0.551967	0.448033
124-4	0.31553	0.68447
12405-4	0.629221	0.370779
12407-4	0.637592	0.362408
12417-4	0.569716	0.430284
12425-4	0.557017	0.442983
12427-4	0.627383	0.372617
12428-4	0.598484	0.401516
12429-4	0.562787	0.437213
1243-4	0.479256	0.520744
12433-4	0.652151	0.347849
12437-4	0.622174	0.377826
12446-4	0.653383	0.346617
1246-4	0.356446	0.643554
12477-4	0.620402	0.379598
12478-4	0.627885	0.372115
12482-4	0.644377	0.355623
12483-4	0.626879	0.373121
12487-4	0.605166	0.394835
12488-4	0.627375	0.372625
12490-4	0.618056	0.381944
12492-4	0.607202	0.392798
12504-4	0.610431	0.389569
12505-4	0.561402	0.438598
12508-4	0.558512	0.441488
1251-4	0.481581	0.518419
12512-4	0.620701	0.379299
12515-4	0.606308	0.393692
12523-4	0.619862	0.380138
12525-4	0.635112	0.364888
12526-4	0.618123	0.381877
12528-4	0.624872	0.375128
12532-4	0.682782	0.317218
12535-4	0.610008	0.389992
12540-4	0.636983	0.363017
12542-4	0.556164	0.443836
12543-4	0.620642	0.379358
12552-4	0.615375	0.384624
12556-4	0.603473	0.396527
12558-4	0.610463	0.389537
12560-4	0.599777	0.400223
12562-4	0.622228	0.377772
12566-4	0.606656	0.393344
12570-4	0.624769	0.37523
12571-4	0.615316	0.384684
12572-4	0.606766	0.393234
12574-4	0.599348	0.400652
12584-4	0.623988	0.376012
12596-4	0.639024	0.360976
12599-4	0.616239	0.383761
12602-4	0.550464	0.449536
12608-4	0.606263	0.393737
12610-4	0.622618	0.377382
12611-4	0.646009	0.353991
12612-4	0.672668	0.327332
12616-4	0.596681	0.403319
12634-4	0.631891	0.36811
12635-4	0.624996	0.375004
1264-4	0.478777	0.521223
12643-4	0.610684	0.389316
12645-4	0.616663	0.383337
12647-4	0.618791	0.381209
12649-4	0.617641	0.382359
12650-4	0.659759	0.340241
12652-4	0.595528	0.404472
12656-4	0.621799	0.378201
12658-4	0.603841	0.396159
12659-4	0.632302	0.367698
12664-4	0.600547	0.399453
12674-4	0.619241	0.380759
12680-4	0.598132	0.401868
12685-4	0.556188	0.443811
12686-4	0.543748	0.456252
12687-4	0.656258	0.343742
12696-4	0.550823	0.449177
12697-4	0.542767	0.457233
12700-4	0.596638	0.403362
12709-4	0.631679	0.368321
1271-4	0.354121	0.645879
12718-4	0.587845	0.412155
1272-4	0.344401	0.655599
12723-4	0.599423	0.400577
12725-4	0.617463	0.382537
12729-4	0.612415	0.387585
12736-4	0.606789	0.393211
12739-4	0.617663	0.382337
12744-4	0.640578	0.359422
12746-4	0.625333	0.374667
12749-4	0.547893	0.452107
12756-4	0.606167	0.393833
12765-4	0.609211	0.390789
12767-4	0.641826	0.358174
12773-4	0.557179	0.442821
12779-4	0.605883	0.394117
12785-4	0.605855	0.394145
12788-4	0.627749	0.372251
12790-4	0.549588	0.450412
12791-4	0.621646	0.378354
12803-4	0.595195	0.404805
12828-4	0.592644	0.407356
1283-4	0.480462	0.519538
12833-4	0.634527	0.365473
12842-4	0.555697	0.444303
12858-4	0.547216	0.452784
12862-4	0.609405	0.390595
12867-4	0.554965	0.445035
1287-4	0.389555	0.610445
12873-4	0.612102	0.387898
12874-4	0.595457	0.404543
12876-4	0.658197	0.341803
12885-4	0.604135	0.395865
12895-4	0.588464	0.411536
12897-4	0.561131	0.438869
12898-4	0.604671	0.395329
12899-4	0.660979	0.339021
12901-4	0.569554	0.430446
12909-4	0.612963	0.387037
1291-4	0.356899	0.643101
12912-4	0.61713	0.38287
12916-4	0.610412	0.389588
12922-4	0.610867	0.389133
12924-4	0.593462	0.406538
12925-4	0.608296	0.391704
12935-4	0.557331	0.442669
1294-4	0.483639	0.516361
12943-4	0.557747	0.442253
12949-4	0.551302	0.448698
12950-4	0.555292	0.444708
12954-4	0.611411	0.388589
12960-4	0.609404	0.390596
12961-4	0.563727	0.436273
12963-4	0.666633	0.333367
12973-4	0.565994	0.434006
12976-4	0.552955	0.447045
12977-4	0.555427	0.444573
12996-4	0.554407	0.445593
13003-4	0.660709	0.339291
13012-4	0.66039	0.33961
13018-4	0.555462	0.444538
13019-4	0.661839	0.338161
13036-4	0.558362	0.441638
13037-4	0.548684	0.451316
13050-4	0.554092	0.445908
13055-4	0.594106	0.405894
13059-4	0.63113	0.36887
13067-4	0.666181	0.333819
13069-4	0.62015	0.37985
13075-4	0.580882	0.419118
13096-4	0.674901	0.325099
13103-4	0.552673	0.447327
13120-4	0.578766	0.421234
13123-4	0.687961	0.312039
1314-4	0.353827	0.646173
13146-4	0.591113	0.408887
13173-4	0.586043	0.413957
13176-4	0.681691	0.318309
13181-4	0.633594	0.366406
13187-4	0.566949	0.433051
1319-4	0.477452	0.522548
13190-4	0.555627	0.444373
1320-4	0.476198	0.523802
13205-4	0.578902	0.421098
13206-4	0.576951	0.423049
13208-4	0.541663	0.458337
13213-4	0.678041	0.321959
13216-4	0.548174	0.451826
13221-4	0.681034	0.318966
13228-4	0.639666	0.360334
13233-4	0.689876	0.310124
13237-4	0.668983	0.331017
1324-4	0.3499	0.6501
13242-4	0.582198	0.417802
13244-4	0.574049	0.425951
13249-4	0.686308	0.313692
13252-4	0.579238	0.420762
13255-4	0.566183	0.433817
13261-4	0.575325	0.424675
13263-4	0.545645	0.454355
13278-4	0.608711	0.391289
13280-4	0.71166	0.28834
13286-4	0.535221	0.464779
1329-4	0.478028	0.521972
13296-4	0.535901	0.464099
13300-4	0.629029	0.370971
13303-4	0.545913	0.454087
13307-4	0.564929	0.435071
13337-4	0.571986	0.428014
1334-4	0.480606	0.519393
13354-4	0.554996	0.445004
13356-4	0.530476	0.469524
13359-4	0.681414	0.318586
13363-4	0.604742	0.395258
13369-4	0.542527	0.457473
13373-4	0.576937	0.423063
13382-4	0.535278	0.464722
13388-4	0.669031	0.330969
13392-4	0.584515	0.415485
13393-4	0.543023	0.456977
13399-4	0.548485	0.451515
13407-4	0.552143	0.447857
13411-4	0.577506	0.422494
13413-4	0.619501	0.380499
13415-4	0.576711	0.423289
13419-4	0.632976	0.367024
1342-4	0.348459	0.651541
13423-4	0.659602	0.340398
13437-4	0.561464	0.438537
13443-4	0.609389	0.390611
13448-4	0.559514	0.440486
13451-4	0.591775	0.408225
13453-4	0.537911	0.462089
13455-4	0.571857	0.428143
13471-4	0.626481	0.373519
13476-4	0.529555	0.470445
13482-4	0.574552	0.425448
13483-4	0.545109	0.454891
13485-4	0.561995	0.438005
1351-4	0.362953	0.637047
13510-4	0.536445	0.463555
13512-4	0.558588	0.441412
13525-4	0.575089	0.424911
13526-4	0.561487	0.438513
13527-4	0.529401	0.470599
13528-4	0.542648	0.457352
1353-4	0.341949	0.658051
13539-4	0.562077	0.437923
13542-4	0.649817	0.350183
1355-4	0.346912	0.653088
13550-4	0.533843	0.466157
13552-4	0.578425	0.421575
13554-4	0.534492	0.465508
13555-4	0.546887	0.453113
13556-4	0.547649	0.452351
13559-4	0.657737	0.342263
13563-4	0.534123	0.465877
13564-4	0.518121	0.481879
13569-4	0.530589	0.469411
13572-4	0.54122	0.45878
13577-4	0.568546	0.431454
13578-4	0.585856	0.414144
13584-4	0.512749	0.487251
13588-4	0.655316	0.344684
13590-4	0.605045	0.394955
13597-4	0.578938	0.421062
13598-4	0.509982	0.490018
13601-4	0.512715	0.487285
13604-4	0.566347	0.433653
13607-4	0.513336	0.486664
13608-4	0.608914	0.391086
13609-4	0.604244	0.395756
13610-4	0.593623	0.406377
13616-4	0.557993	0.442007
13620-4	0.60824	0.391761
13624-4	0.648825	0.351175
13625-4	0.578933	0.421067
13628-4	0.590694	0.409306
13631-4	0.576689	0.423311
13632-4	0.532696	0.467304
13640-4	0.567219	0.432781
13642-4	0.508797	0.491203
13643-4	0.552559	0.447441
13655-4	0.599974	0.400026
13663-4	0.57054	0.42946
13671-4	0.547219	0.452781
13673-4	0.510986	0.489014
13677-4	0.613924	0.386076
13678-4	0.59155	0.40845
13681-4	0.643431	0.356569
13686-4	0.548627	0.451373
13701-4	0.571432	0.428568
13702-4	0.600932	0.399068
13705-4	0.58783	0.41217
13706-4	0.495549	0.504451
13711-4	0.586737	0.413263
13712-4	0.58837	0.41163
13717-4	0.543518	0.456482
13720-4	0.546757	0.453243
13724-4	0.638619	0.361381
1375-4	0.375838	0.624162
13757-4	0.697039	0.302961
1376-4	0.350957	0.649043
13771-4	0.739993	0.260007
13785-4	0.706228	0.293772
13788-4	0.745463	0.254537
1380-4	0.373873	0.626127
13818-4	0.744847	0.255153
13822-4	0.73034	0.26966
13864-4	0.788312	0.211688
1388-4	0.345346	0.654654
13883-4	0.70089	0.29911
13904-4	0.779647	0.220353
13912-4	0.765449	0.234551
13914-4	0.769231	0.230769
1392-4	0.344412	0.655588
13934-4	0.776053	0.223947
1394-4	0.35076	0.64924
13941-4	0.585551	0.414449
13953-4	0.709599	0.290401
13987-4	0.688384	0.311616
1399-4	0.389611	0.610389
14022-4	0.693906	0.306094
14051-4	0.638923	0.361077
14057-4	0.68073	0.31927
14061-4	0.69405	0.30595
14071-4	0.74156	0.25844
14079-4	0.649662	0.350338
14082-4	0.656689	0.343311
14098-4	0.618835	0.381165
14100-4	0.719495	0.280505
14117-4	0.684341	0.315659
14133-4	0.645351	0.354649
14137-4	0.647748	0.352252
14138-4	0.650455	0.349546
14155-4	0.631958	0.368042
14160-4	0.666802	0.333198
14178-4	0.641195	0.358805
14185-4	0.602526	0.397475
14191-4	0.572112	0.427888
14199-4	0.639608	0.360392
1420-4	0.357224	0.642776
14202-4	0.668437	0.331563
14208-4	0.657339	0.342661
14209-4	0.592834	0.407166
14217-4	0.614803	0.385197
14222-4	0.658459	0.341541
14227-4	0.573178	0.426822
1423-4	0.345181	0.65482
14231-4	0.627479	0.372521
14233-4	0.657366	0.342634
14239-4	0.558084	0.441916
14249-4	0.605373	0.394627
14268-4	0.622539	0.377461
1427-4	0.54465	0.45535
14278-4	0.600435	0.399565
14279-4	0.599005	0.400995
14285-4	0.61299	0.38701
14288-4	0.560517	0.439483
14289-4	0.609816	0.390184
14300-4	0.596801	0.403199
14302-4	0.554917	0.445083
14313-4	0.560489	0.439511
14315-4	0.584995	0.415005
14317-4	0.644041	0.355959
14326-4	0.561641	0.438359
14334-4	0.651158	0.348842
14357-4	0.53606	0.46394
1438-4	0.464388	0.535612
14381-4	0.575603	0.424397
14388-4	0.577397	0.422603
1439-4	0.346221	0.653779
14394-4	0.545244	0.454756
1440-4	0.588975	0.411025
14406-4	0.566658	0.433342
14414-4	0.689495	0.310505
14418-4	0.575862	0.424138
14420-4	0.575062	0.424938
14422-4	0.52707	0.47293
14428-4	0.565655	0.434345
14453-4	0.566052	0.433948
14456-4	0.611142	0.388858
14466-4	0.619469	0.380531
14469-4	0.621402	0.378598
1448-4	0.385234	0.614765
14483-4	0.571776	0.428224
14494-4	0.603586	0.396414
14498-4	0.505752	0.494248
14503-4	0.505114	0.494886
1452-4	0.346538	0.653462
1455-4	0.458024	0.541976
1457-4	0.387547	0.612453
14578-4	0.772574	0.227426
1458-4	0.377055	0.622945
1459-4	0.339292	0.660708
14599-4	0.762057	0.237943
1464-4	0.360354	0.639646
1465-4	0.344302	0.655698
1466-4	0.342398	0.657602
1467-4	0.353515	0.646485
14689-4	0.825362	0.174638
1469-4	0.487626	0.512374
14703-4	0.72518	0.27482
1472-4	0.342643	0.657357
14738-4	0.701709	0.298291
1474-4	0.341242	0.658758
14748-4	0.707879	0.292121
1480-4	0.384868	0.615132
1482-4	0.366952	0.633048
1483-4	0.343391	0.656609
14832-4	0.718721	0.281279
1486-4	0.38241	0.61759
1487-4	0.366546	0.633454
1488-4	0.364488	0.635512
14884-4	0.70704	0.29296
14891-4	0.636788	0.363212
14896-4	0.692818	0.307182
14914-4	0.665219	0.334781
1492-4	0.372474	0.627526
14938-4	0.710351	0.289649
1496-4	0.359716	0.640284
14960-4	0.6299	0.3701
1497-4	0.354784	0.645216
1498-4	0.354886	0.645114
1503-4	0.381776	0.618224
15035-4	0.644999	0.355001
1504-4	0.341003	0.658997
15065-4	0.715926	0.284074
15086-4	0.631502	0.368498
1514-4	0.347353	0.652647
15148-4	0.599282	0.400718
1515-4	0.343418	0.656582
15170-4	0.671574	0.328426
15220-4	0.629279	0.370721
1523-4	0.384129	0.615871
15240-4	0.635048	0.364952
1525-4	0.373785	0.626215
1526-4	0.344535	0.655465
1528-4	0.354668	0.645332
15287-4	0.70204	0.29796
1529-4	0.376227	0.623773
1532-4	0.354982	0.645018
1536-4	0.369887	0.630113
15384-4	0.606216	0.393784
1540-4	0.342986	0.657014
1541-4	0.385885	0.614115
1543-4	0.353331	0.646669
15445-4	0.650675	0.349325
1546-4	0.379991	0.620009
15463-4	0.823573	0.176427
15497-4	0.655444	0.344556
15498-4	0.703926	0.296074
15503-4	0.778671	0.221329
1551-4	0.397953	0.602047
1553-4	0.381615	0.618385
15537-4	0.63703	0.36297
15573-4	0.803489	0.196511
15578-4	0.718768	0.281232
1558-4	0.344813	0.655187
1559-4	0.331995	0.668005
1560-4	0.491123	0.508877
15612-4	0.781778	0.218223
15619-4	0.765471	0.234529
1562-4	0.360846	0.639154
15623-4	0.728194	0.271806
1563-4	0.379502	0.620498
15641-4	0.62993	0.37007
15649-4	0.621783	0.378217
1566-4	0.383604	0.616396
15665-4	0.632809	0.367191
1567-4	0.362903	0.637097
1568-4	0.357347	0.642653
15688-4	0.663223	0.336777
1569-4	0.375416	0.624584
1573-4	0.381895	0.618105
1574-4	0.343958	0.656042
1575-4	0.367477	0.632523
1576-4	0.364238	0.635762
15760-4	0.700743	0.299257
1577-4	0.384117	0.615883
15773-4	0.74754	0.25246
15780-4	0.649712	0.350288
15791-4	0.713459	0.286541
1580-4	0.343053	0.656947
15806-4	0.675154	0.324846
1582-4	0.345482	0.654518
15822-4	0.66082	0.33918
15833-4	0.697765	0.302235
1584-4	0.371957	0.628042
1585-4	0.457176	0.542824
15850-4	0.672697	0.327303
1586-4	0.370219	0.629781
15866-4	0.694192	0.305808
15890-4	0.634258	0.365742
1590-4	0.377618	0.622382
1592-4	0.365675	0.634325
1594-4	0.399385	0.600615
15947-4	0.665648	0.334352
15948-4	0.66451	0.33549
1595-4	0.379426	0.620574
1596-4	0.375305	0.624695
1597-4	0.350309	0.649691
1598-4	0.346729	0.653271
16026-4	0.773339	0.226661
1604-4	0.348427	0.651573
1606-4	0.401264	0.598736
16060-4	0.737508	0.262492
16068-4	0.687685	0.312315
1607-4	0.397787	0.602213
1608-4	0.356839	0.643161
1609-4	0.356234	0.643766
1610-4	0.319572	0.680428
1611-4	0.384453	0.615547
16116-4	0.731784	0.268216
1612-4	0.366712	0.633288
16123-4	0.66284	0.33716
16124-4	0.768196	0.231804
1613-4	0.379441	0.620559
1614-4	0.351493	0.648507
16146-4	0.674948	0.325052
1615-4	0.359474	0.640526
1616-4	0.345524	0.654476
16175-4	0.814234	0.185766
16176-4	0.73369	0.26631
162-4	0.318646	0.681354
1620-4	0.380256	0.619744
16203-4	0.752005	0.247995
16211-4	0.739709	0.260291
1622-4	0.359478	0.640522
16222-4	0.749026	0.250974
1623-4	0.362344	0.637656
1624-4	0.381368	0.618632
1625-4	0.317626	0.682373
16251-4	0.664044	0.335956
1626-4	0.359184	0.640816
1627-4	0.367901	0.6321
16274-4	0.744178	0.255822
16275-4	0.722036	0.277964
1628-4	0.360528	0.639473
1629-4	0.347225	0.652775
16294-4	0.73831	0.26169
16305-4	0.651161	0.348839
1633-4	0.358803	0.641197
16338-4	0.655717	0.344283
1635-4	0.387958	0.612042
1636-4	0.37288	0.62712
16364-4	0.650961	0.349039
16366-4	0.733645	0.266355
1637-4	0.357643	0.642357
16386-4	0.599501	0.400499
16392-4	0.760247	0.239753
16401-4	0.656301	0.343699
16418-4	0.737758	0.262242
1642-4	0.328131	0.671869
1643-4	0.368778	0.631222
1645-4	0.361856	0.638144
16455-4	0.646889	0.353111
1646-4	0.349188	0.650812
16461-4	0.704504	0.295496
16471-4	0.818664	0.181336
16474-4	0.733913	0.266087
1648-4	0.388432	0.611568
1649-4	0.378453	0.621547
1650-4	0.369146	0.630854
16500-4	0.69564	0.30436
16504-4	0.647787	0.352213
16515-4	0.645645	0.354355
1653-4	0.379748	0.620252
16533-4	0.685247	0.314753
16538-4	0.649947	0.350053
16540-4	0.647373	0.352628
1658-4	0.373504	0.626496
1659-4	0.380994	0.619006
16596-4	0.770776	0.229224
16602-4	0.658945	0.341055
16608-4	0.706551	0.293449
1661-4	0.402204	0.597796
1663-4	0.323292	0.676708
16631-4	0.652471	0.347529
1664-4	0.356423	0.643577
16647-4	0.781587	0.218413
1666-4	0.34587	0.65413
1667-4	0.347943	0.652057
1669-4	0.344492	0.655508
16697-4	0.694297	0.305703
1671-4	0.357365	0.642635
16726-4	0.670437	0.329563
16739-4	0.653806	0.346194
1676-4	0.458822	0.541178
1677-4	0.347676	0.652324
16777-4	0.847027	0.152973
16786-4	0.695942	0.304058
16791-4	0.668018	0.331982
16796-4	0.67964	0.32036
1681-4	0.358366	0.641634
1683-4	0.354992	0.645008
16833-4	0.784764	0.215236
16838-4	0.685319	0.314681
16839-4	0.684958	0.315042
16843-4	0.659822	0.340178
16845-4	0.676865	0.323135
1685-4	0.315823	0.684177
16851-4	0.87534	0.12466
16859-4	0.665294	0.334706
1686-4	0.33307	0.66693
16863-4	0.763693	0.236307
16864-4	0.65118	0.34882
16877-4	0.685475	0.314525
16894-4	0.638944	0.361056
1690-4	0.384424	0.615576
16906-4	0.663599	0.336401
16914-4	0.693923	0.306077
1692-4	0.324243	0.675757
16925-4	0.630938	0.369062
1693-4	0.36189	0.63811
16934-4	0.648085	0.351915
1695-4	0.364082	0.635918
16957-4	0.66059	0.33941
1696-4	0.362048	0.637952
1697-4	0.368964	0.631036
16978-4	0.679737	0.320263
16982-4	0.621894	0.378106
1700-4	0.321075	0.678925
17001-4	0.693824	0.306176
17005-4	0.68694	0.313061
1701-4	0.359402	0.640598
17016-4	0.675595	0.324405
17017-4	0.63958	0.36042
17019-4	0.657996	0.342004
17020-4	0.646626	0.353374
17026-4	0.694343	0.305657
17033-4	0.687494	0.312506
17035-4	0.657099	0.342901
1704-4	0.38139	0.61861
1705-4	0.374697	0.625303
1706-4	0.383605	0.616395
17067-4	0.637808	0.362192
1707-4	0.38537	0.61463
17080-4	0.677149	0.322851
17084-4	0.637201	0.362799
17085-4	0.686771	0.313229
17087-4	0.640907	0.359093
171-4	0.316001	0.684
17104-4	0.653192	0.346808
1711-4	0.378146	0.621854
17110-4	0.726454	0.273546
17113-4	0.708733	0.291267
17116-4	0.675501	0.324499
17120-4	0.674951	0.325049
17123-4	0.673068	0.326932
17127-4	0.67775	0.32225
17134-4	0.68484	0.31516
17140-4	0.65147	0.34853
17150-4	0.674345	0.325655
17155-4	0.619184	0.380816
17160-4	0.680295	0.319705
17170-4	0.651826	0.348174
1718-4	0.405558	0.594442
17181-4	0.631002	0.368998
17184-4	0.640656	0.359344
17186-4	0.686967	0.313033
17187-4	0.688629	0.311371
17189-4	0.773099	0.226901
1719-4	0.384896	0.615104
17196-4	0.641999	0.358001
17198-4	0.67099	0.32901
1720-4	0.371275	0.628725
17203-4	0.63749	0.36251
17208-4	0.647773	0.352227
1721-4	0.32012	0.67988
17211-4	0.637393	0.362607
17219-4	0.681969	0.318031
1722-4	0.330177	0.669823
1723-4	0.374021	0.625979
17233-4	0.682939	0.317061
17234-4	0.688068	0.311932
17235-4	0.621282	0.378717
17239-4	0.678784	0.321216
1724-4	0.385575	0.614425
17241-4	0.76704	0.23296
17252-4	0.668972	0.331028
17256-4	0.648531	0.351469
17257-4	0.64551	0.35449
1726-4	0.335175	0.664825
17262-4	0.640168	0.359832
17279-4	0.687099	0.312901
1728-4	0.390291	0.609709
17286-4	0.644469	0.355531
17304-4	0.643672	0.356328
17305-4	0.644865	0.355135
17308-4	0.619724	0.380276
17309-4	0.66307	0.33693
17313-4	0.706133	0.293867
17314-4	0.666675	0.333325
17315-4	0.617908	0.382092
17316-4	0.651316	0.348684
17319-4	0.701929	0.298071
1732-4	0.374383	0.625617
17320-4	0.662903	0.337097
17321-4	0.680226	0.319774
17324-4	0.649864	0.350135
1733-4	0.335808	0.664192
17335-4	0.66444	0.33556
17337-4	0.717961	0.282039
17342-4	0.652852	0.347148
17345-4	0.653072	0.346928
17349-4	0.623083	0.376917
17354-4	0.724769	0.275231
17356-4	0.718451	0.281549
1736-4	0.396663	0.603337
1737-4	0.31713	0.68287
17374-4	0.645963	0.354037
1738-4	0.313898	0.686102
17387-4	0.666297	0.333703
1739-4	0.366648	0.633352
1740-4	0.359944	0.640056
17400-4	0.713239	0.286761
17404-4	0.648201	0.351799
1741-4	0.355074	0.644926
17417-4	0.669875	0.330125
1743-4	0.347108	0.652892
17432-4	0.718343	0.281657
17433-4	0.700982	0.299018
17437-4	0.634209	0.365791
1744-4	0.333494	0.666506
17440-4	0.647469	0.352531
17446-4	0.674504	0.325496
1745-4	0.362184	0.637816
1746-4	0.322598	0.677402
17468-4	0.71249	0.28751
1748-4	0.36408	0.63592
17481-4	0.666796	0.333204
17485-4	0.675541	0.324459
17486-4	0.656985	0.343015
17489-4	0.650758	0.349242
17495-4	0.652953	0.347047
17505-4	0.660469	0.339531
17507-4	0.680617	0.319383
17509-4	0.63285	0.36715
1751-4	0.371004	0.628996
1752-4	0.389349	0.610651
17526-4	0.655576	0.344424
1753-4	0.389418	0.610583
1754-4	0.385126	0.614874
17541-4	0.659578	0.340422
17547-4	0.662514	0.337486
17548-4	0.713336	0.286664
1755-4	0.351755	0.648245
17556-4	0.671168	0.328832
17578-4	0.664588	0.335412
1758-4	0.369831	0.630169
1759-4	0.334467	0.665533
17596-4	0.71339	0.28661
1760-4	0.383054	0.616946
17600-4	0.656822	0.343178
17603-4	0.667016	0.332984
1761-4	0.385544	0.614456
17610-4	0.665015	0.334985
17620-4	0.689926	0.310074
17626-4	0.663442	0.336558
17632-4	0.658855	0.341145
1764-4	0.401184	0.598816
17644-4	0.657638	0.342362
17649-4	0.676221	0.32378
17652-4	0.659397	0.340603
17653-4	0.711084	0.288916
1766-4	0.324919	0.675081
17661-4	0.676077	0.323923
17662-4	0.67421	0.32579
1767-4	0.392488	0.607512
17674-4	0.656347	0.343653
1768-4	0.377774	0.622226
17685-4	0.678524	0.321476
17692-4	0.663445	0.336555
17694-4	0.657789	0.342211
1770-4	0.335297	0.664703
17704-4	0.649254	0.350746
1771-4	0.335446	0.664554
1772-4	0.398273	0.601727
17722-4	0.700105	0.299895
17737-4	0.663409	0.336591
17742-4	0.657261	0.342739
1775-4	0.385099	0.614901
17756-4	0.715757	0.284244
17757-4	0.668386	0.331614
1776-4	0.371777	0.628223
17762-4	0.677612	0.322388
1777-4	0.398948	0.601052
17786-4	0.68558	0.31442
17787-4	0.658258	0.341742
17788-4	0.69655	0.30345
1779-4	0.365771	0.634229
17790-4	0.658363	0.341637
17791-4	0.660093	0.339907
17794-4	0.68072	0.31928
1781-4	0.350203	0.649797
17811-4	0.657587	0.342413
17812-4	0.667225	0.332775
17814-4	0.660235	0.339765
17815-4	0.6497	0.3503
17819-4	0.68295	0.31705
17827-4	0.690316	0.309684
17834-4	0.662394	0.337606
1784-4	0.314071	0.685929
17841-4	0.66215	0.33785
17851-4	0.693484	0.306516
17862-4	0.670696	0.329304
17863-4	0.716682	0.283318
17864-4	0.688486	0.311514
17875-4	0.689761	0.310239
17876-4	0.664847	0.335153
17882-4	0.660062	0.339938
17884-4	0.670275	0.329725
1789-4	0.370982	0.629018
17890-4	0.692702	0.307298
17902-4	0.65983	0.34017
17906-4	0.66642	0.33358
17910-4	0.659192	0.340808
17914-4	0.660775	0.339225
17922-4	0.671462	0.328539
17925-4	0.700316	0.299684
17934-4	0.687308	0.312692
1796-4	0.338611	0.661389
17960-4	0.656385	0.343615
17971-4	0.728159	0.271841
17972-4	0.686474	0.313526
1798-4	0.39369	0.60631
17981-4	0.664874	0.335127
17984-4	0.697905	0.302095
17994-4	0.664456	0.335544
17995-4	0.652868	0.347132
1800-4	0.315574	0.684426
18006-4	0.680035	0.319965
1801-4	0.325186	0.674814
18021-4	0.683184	0.316815
18028-4	0.672934	0.327066
18039-4	0.649999	0.350001
18056-4	0.686546	0.313454
18061-4	0.703765	0.296235
18065-4	0.510967	0.489033
18068-4	0.677828	0.322172
1807-4	0.383851	0.616149
18077-4	0.647826	0.352174
1808-4	0.329747	0.670253
18083-4	0.680571	0.319429
181-4	0.329064	0.670936
18111-4	0.52754	0.47246
18119-4	0.68113	0.31887
1812-4	0.385247	0.614753
18123-4	0.676553	0.323447
1813-4	0.319387	0.680613
18134-4	0.663104	0.336896
18150-4	0.682245	0.317755
18152-4	0.686354	0.313646
18155-4	0.669443	0.330558
18162-4	0.530546	0.469454
1817-4	0.373747	0.626254
18170-4	0.740811	0.259189
18171-4	0.696527	0.303473
18176-4	0.697749	0.302251
1818-4	0.392633	0.607367
18184-4	0.681192	0.318808
1819-4	0.389824	0.610176
18193-4	0.685342	0.314658
182-4	0.343184	0.656816
1820-4	0.330309	0.669691
1821-4	0.391245	0.608755
18214-4	0.746164	0.253836
18229-4	0.669434	0.330566
1823-4	0.378234	0.621766
18230-4	0.686644	0.313356
18235-4	0.719408	0.280592
1824-4	0.349363	0.650637
18256-4	0.725565	0.274435
18257-4	0.676405	0.323595
1826-4	0.396463	0.603537
18266-4	0.71424	0.28576
18278-4	0.723746	0.276254
1828-4	0.32501	0.67499
18285-4	0.676281	0.323719
1829-4	0.337643	0.662357
18293-4	0.620212	0.379788
18299-4	0.57516	0.42484
1830-4	0.382962	0.617038
18310-4	0.677699	0.322301
18313-4	0.674616	0.325384
18315-4	0.74941	0.25059
1832-4	0.32776	0.67224
18322-4	0.702574	0.297426
1833-4	0.313554	0.686446
18330-4	0.718023	0.281977
18333-4	0.676932	0.323068
1834-4	0.386253	0.613747
18344-4	0.617866	0.382134
1835-4	0.313407	0.686593
18351-4	0.687803	0.312197
18365-4	0.732216	0.267784
18368-4	0.675689	0.324311
18369-4	0.715003	0.284997
18377-4	0.622832	0.377168
1838-4	0.391241	0.608759
18383-4	0.677255	0.322745
18393-4	0.561646	0.438354
18396-4	0.596787	0.403213
1841-4	0.371915	0.628085
18410-4	0.61023	0.38977
1842-4	0.388989	0.611011
18424-4	0.718945	0.281055
1843-4	0.391592	0.608408
18432-4	0.612706	0.387294
18434-4	0.569883	0.430117
1846-4	0.356645	0.643355
1847-4	0.383449	0.616551
18488-4	0.716337	0.283662
1849-4	0.393894	0.606106
18496-4	0.691096	0.308904
18513-4	0.942042	0.0579582
1853-4	0.327851	0.672149
18543-4	0.686116	0.313884
1857-4	0.392354	0.607646
18600-4	0.631126	0.368874
1862-4	0.318608	0.681392
18620-4	0.603777	0.396223
1863-4	0.334439	0.665561
1864-4	0.330594	0.669406
18659-4	0.692601	0.307399
1868-4	0.315524	0.684476
18699-4	0.785755	0.214245
1870-4	0.416666	0.583334
1871-4	0.328636	0.671364
18712-4	0.650259	0.349741
18715-4	0.758846	0.241154
1873-4	0.382776	0.617224
18742-4	0.654454	0.345546
18751-4	0.701399	0.298601
18764-4	0.681443	0.318557
18767-4	0.671151	0.328849
1877-4	0.392159	0.607841
18782-4	0.707101	0.292899
18808-4	0.758105	0.241895
18829-4	0.680931	0.319069
1883-4	0.390784	0.609216
18832-4	0.684258	0.315742
18837-4	0.705064	0.294936
1884-4	0.384933	0.615067
1885-4	0.393466	0.606534
1888-4	0.330969	0.669032
1889-4	0.327816	0.672184
18893-4	0.725585	0.274415
18900-4	0.655495	0.344505
18910-4	0.723687	0.276313
1892-4	0.356778	0.643222
18928-4	0.734977	0.265023
18931-4	0.649892	0.350108
1894-4	0.379387	0.620613
18956-4	0.654235	0.345765
1896-4	0.331921	0.668079
18963-4	0.758505	0.241495
1897-4	0.331101	0.668899
18972-4	0.645882	0.354118
1899-4	0.360261	0.639739
18991-4	0.648077	0.351923
18997-4	0.652398	0.347602
45766	0.263551	0.736449
92	0.376996	0.623004
19024-4	0.867101	0.132899
19025-4	0.68934	0.31066
1553	0.39143	0.60857
19044-4	0.649093	0.350907
19047-4	0.697772	0.302228
19057-4	0.698489	0.301511
19074-4	0.663207	0.336793
19086-4	0.847647	0.152353
3379	0.313637	0.686363
19091-4	0.66543	0.33457
19097-4	0.697536	0.302464
3744	0.333133	0.666867
19104-4	0.696339	0.303661
19132-4	0.690403	0.309597
5205	0.360614	0.639386
5570	0.387265	0.612735
5936	0.348208	0.651792
6666	0.354193	0.645807
19201-4	0.67951	0.32049
19208-4	0.644591	0.355409
19211-4	0.656993	0.343007
19222-4	0.719229	0.280771
19225-4	0.6496	0.3504
19229-4	0.619835	0.380165
8492	0.330016	0.669984
19235-4	0.620423	0.379577
19239-4	0.646424	0.353576
19243-4	0.621153	0.378847
19249-4	0.627578	0.372422
19251-4	0.617795	0.382205
19254-4	0.667505	0.332495
9588	0.411485	0.588515
19262-4	0.650585	0.349415
19265-4	0.662804	0.337196
19267-4	0.645898	0.354102
10319	0.325904	0.674096
19284-4	0.647752	0.352248
19288-4	0.664177	0.335823
10684	0.324709	0.675291
19292-4	0.714406	0.285594
19293-4	0.717241	0.282759
19298-4	0.662411	0.337589
19299-4	0.672282	0.327718
11049	0.329385	0.670615
19301-4	0.650074	0.349926
19305-4	0.663465	0.336535
19307-4	0.666333	0.333667
19316-4	0.718456	0.281544
11780	0.336902	0.663098
19328-4	0.657291	0.342709
12145	0.31751	0.68249
19332-4	0.667007	0.332993
19346-4	0.653114	0.346886
13241	0.383792	0.616208
19362-4	0.699978	0.300022
19363-4	0.541665	0.458335
19366-4	0.661042	0.338958
19367-4	0.709737	0.290263
19369-4	0.710572	0.289428
13606	0.437645	0.562355
19370-4	0.706474	0.293526
19373-4	0.543432	0.456568
13971	0.402703	0.597297
19388-4	0.660623	0.339377
14336	0.398113	0.601887
19401-4	0.680988	0.319012
19413-4	0.659098	0.340902
19415-4	0.661466	0.338534
19419-4	0.681923	0.318077
19420-4	0.650044	0.349956
16528	0.430889	0.569111
19450-4	0.702398	0.297602
19454-4	0.669789	0.330211
17989	0.369034	0.630966
19497-4	0.665033	0.334967
18354	0.368788	0.631212
19510-4	0.746515	0.253484
19513-4	0.713135	0.286865
19514-4	0.73002	0.26998
19542-4	0.665856	0.334144
19546-4	0.661282	0.338718
19555-4	0.660815	0.339185
20546	0.351004	0.648996
19562-4	0.67246	0.32754
20911	0.40101	0.59899
21641	0.33108	0.66892
22737	0.347163	0.652837
25659	0.317618	0.682382
26755	0.353411	0.646589
27120	0.372464	0.627536
28216	0.357017	0.642983
28946	0.320927	0.679073
29312	0.374656	0.625344
30407	0.327519	0.672481
32599	0.318328	0.681672
33329	0.331187	0.668813
34060	0.329858	0.670142
34790	0.320326	0.679674
35156	0.405055	0.594945
35886	0.333896	0.666104
45692	0.264303	0.735696
36982	0.34722	0.65278
37347	0.35066	0.64934
38443	0.314617	0.685383
38808	0.341725	0.658275
39904	0.435182	0.564818
201-4	0.459293	0.540707
41365	0.443109	0.556891
42461	0.422347	0.577653
43191	0.370675	0.629325
43922	0.355004	0.644996
45017	0.403048	0.596952
45748	0.338149	0.661851
46113	0.330205	0.669795
46844	0.405211	0.594789
47574	0.371746	0.628254
48670	0.36114	0.63886
204-4	0.335392	0.664608
51227	0.418013	0.581987
51592	0.320658	0.679342
52688	0.35417	0.64583
53783	0.41426	0.58574
54514	0.411578	0.588422
55975	0.358578	0.641422
56340	0.417473	0.582527
56705	0.437581	0.562419
57801	0.337167	0.662833
58166	0.45001	0.54999
60723	0.329716	0.670284
61454	0.382078	0.617922
61819	0.328513	0.671487
63645	0.429604	0.570396
64741	0.440191	0.559809
65471	0.338703	0.661296
208-4	0.340176	0.659824
65837	0.340816	0.659184
66202	0.415362	0.584638
67298	0.339036	0.660964
67663	0.413694	0.586306
68759	0.331824	0.668176
69124	0.404221	0.595779
70220	0.445896	0.554104
73141	0.342177	0.657823
74967	0.350654	0.649346
75697	0.433313	0.566687
77524	0.420505	0.579495
77889	0.429188	0.570812
80446	0.336163	0.663837
81176	0.335719	0.664281
81541	0.404007	0.595993
81907	0.342406	0.657594
82272	0.344663	0.655337
82637	0.354911	0.645089
83002	0.41956	0.58044
83733	0.348196	0.651804
84098	0.423747	0.576253
84463	0.442361	0.557639
85559	0.442121	0.557879
214-4	0.343534	0.656466
88116	0.332352	0.667648
88481	0.397648	0.602352
89942	0.418911	0.581089
92499	0.341862	0.658138
92864	0.327665	0.672335
93229	0.374416	0.625584
93960	0.424583	0.575417
95056	0.324958	0.675042
95421	0.451309	0.548691
96882	0.41732	0.58268
97612	0.352249	0.647751
97978	0.361251	0.638749
99439	0.451347	0.548653
101265	0.344662	0.655338
101630	0.331002	0.668998
101995	0.359295	0.640705
103091	0.342801	0.657199
21838-4	0.497076	0.502924
219-4	0.343882	0.656118
106378	0.448317	0.551683
107109	0.394912	0.605088
107474	0.459957	0.540043
108570	0.438556	0.561444
108935	0.423665	0.576335
109300	0.419208	0.580792
111126	0.367077	0.632923
112221	0.373935	0.626066
112587	0.394527	0.605473
22109-4	0.32485	0.67515
113682	0.439315	0.560685
115874	0.343498	0.656502
116970	0.416811	0.583189
22235-4	0.459204	0.540796
120257	0.349514	0.650486
22293-4	0.453977	0.546023
121353	0.449164	0.550836
125736	0.411867	0.588133
126101	0.400585	0.599415
22463-4	0.577585	0.422415
126831	0.380964	0.619036
127562	0.418175	0.581825
127927	0.433696	0.566304
128658	0.573769	0.426231
129023	0.370867	0.629133
130849	0.347583	0.652417
22599-4	0.261817	0.738183
133406	0.355897	0.644103
133771	0.366185	0.633815
134867	0.415753	0.584247
135232	0.39695	0.60305
135597	0.435766	0.564234
137789	0.407714	0.592286
144729	0.424069	0.575931
145459	0.427182	0.572818
230-4	0.325392	0.674608
148380	0.427737	0.572263
150206	0.386921	0.613079
23117-4	0.392454	0.607546
23119-4	0.40684	0.59316
150937	0.419001	0.580999
155320	0.392635	0.607365
156416	0.387855	0.612145
156781	0.433783	0.566217
157511	0.570115	0.429885
23368-4	0.263273	0.736727
23385-4	0.269082	0.730918
234-4	0.300659	0.699341
161529	0.567353	0.432648
23427-4	0.587252	0.412748
163355	0.391436	0.608564
23471-4	0.631101	0.368899
163721	0.42865	0.57135
164451	0.424371	0.575629
23507-4	0.589164	0.410836
23543-4	0.585511	0.414489
166277	0.457374	0.542627
168469	0.427363	0.572637
23678-4	0.317265	0.682735
173217	0.399785	0.600215
23746-4	0.63706	0.36294
174313	0.385208	0.614792
23770-4	0.670223	0.329777
238-4	0.315652	0.684348
175409	0.562235	0.437765
176504	0.455908	0.544092
177235	0.385227	0.614773
23907-4	0.631224	0.368776
180522	0.56611	0.433891
180887	0.414096	0.585904
182714	0.46813	0.53187
24039-4	0.583792	0.416208
184175	0.437036	0.562964
24044-4	0.649201	0.350799
24059-4	0.605969	0.394032
24083-4	0.690143	0.309857
24084-4	0.620441	0.379559
24089-4	0.266529	0.733471
24136-4	0.604879	0.395121
24144-4	0.744735	0.255265
24150-4	0.843071	0.156929
24195-4	0.694299	0.305702
242-4	0.346141	0.653859
24224-4	0.618776	0.381224
191114	0.416659	0.583341
24256-4	0.638082	0.361918
24294-4	0.603568	0.396432
24334-4	0.49927	0.50073
195497	0.506182	0.493818
24350-4	0.601519	0.398481
24392-4	0.615999	0.384001
245-4	0.309721	0.69028
24539-4	0.466566	0.533434
24652-4	0.733976	0.266024
208281	0.513908	0.486092
209377	0.529515	0.470485
24813-4	0.572882	0.427118
24830-4	0.59834	0.40166
213395	0.470195	0.529805
24854-4	0.590669	0.409332
249-4	0.34267	0.65733
24916-4	0.806732	0.193268
216317	0.459877	0.540123
24926-4	0.79679	0.20321
24937-4	0.587864	0.412136
25030-4	0.67908	0.32092
25069-4	0.597582	0.402418
25075-4	0.678127	0.321873
25105-4	0.736307	0.263693
223255	0.454061	0.545939
223621	0.454711	0.545289
25126-4	0.678676	0.321324
25148-4	0.75022	0.24978
25149-4	0.681807	0.318193
25166-4	0.685325	0.314675
25197-4	0.747823	0.252177
25223-4	0.725717	0.274283
25255-4	0.743497	0.256503
25296-4	0.742291	0.257709
253-4	0.340251	0.659749
25364-4	0.753976	0.246024
25370-4	0.742624	0.257376
234578	0.513699	0.486301
25539-4	0.307548	0.692452
240422	0.51354	0.48646
243709	0.507175	0.492825
245901	0.657567	0.342433
246631	0.454571	0.545429
246997	0.463925	0.536075
25846-4	0.540962	0.459038
252841	0.455036	0.544964
253206	0.456521	0.543479
25952-4	0.517752	0.482248
25982-4	0.521421	0.478579
26010-4	0.534262	0.465738
259414	0.521806	0.478194
260145	0.431971	0.568029
260875	0.458639	0.541361
262-4	0.306811	0.693189
263067	0.463729	0.536271
263-4	0.352227	0.647773
267815	0.452683	0.547317
26444-4	0.772718	0.227282
26461-4	0.825382	0.174618
273294	0.518563	0.481437
274755	0.457401	0.542599
276216	0.46109	0.53891
26562-4	0.760754	0.239246
26613-4	0.671014	0.328986
26621-4	0.666553	0.333447
278772	0.442586	0.557415
282425	0.436728	0.563272
283155	0.436536	0.563464
26763-4	0.565346	0.434654
26814-4	0.617593	0.382407
286808	0.50872	0.49128
287173	0.450844	0.549156
26872-4	0.675688	0.324312
26900-4	0.683407	0.316593
26903-4	0.742126	0.257874
290460	0.45507	0.54493
290826	0.456219	0.543781
291556	0.461451	0.538549
293747	0.461376	0.538624
27150-4	0.519707	0.480293
27176-4	0.877444	0.122556
303243	0.442956	0.557044
305435	0.464925	0.535075
306896	0.440215	0.559785
307261	0.466105	0.533895
27428-4	0.781356	0.218644
311644	0.47871	0.52129
312374	0.46928	0.53072
27617-4	0.605765	0.394235
314931	0.442991	0.557009
27627-4	0.887512	0.112488
27648-4	0.599366	0.400634
316027	0.451168	0.548832
317123	0.461088	0.538912
27696-4	0.602445	0.397555
277-4	0.344633	0.655367
27711-4	0.601197	0.398803
27745-4	0.605298	0.394702
27758-4	0.599884	0.400116
320045	0.45951	0.54049
321506	0.472869	0.527131
27813-4	0.624586	0.375414
27820-4	0.623674	0.376326
27829-4	0.623229	0.376771
322601	0.466924	0.533076
322967	0.459229	0.540771
27842-4	0.624625	0.375375
27849-4	0.625202	0.374798
27853-4	0.540671	0.459329
27872-4	0.62158	0.37842
324428	0.444062	0.555938
27880-4	0.614668	0.385332
27891-4	0.618233	0.381767
27894-4	0.618518	0.381482
27909-4	0.6137	0.3863
27917-4	0.612262	0.387738
325889	0.474706	0.525294
27924-4	0.622905	0.377095
27930-4	0.615064	0.384936
27932-4	0.621339	0.378661
27964-4	0.613673	0.386327
27981-4	0.856376	0.143624
27986-4	0.501563	0.498437
27988-4	0.541824	0.458176
28010-4	0.615697	0.384303
28011-4	0.61327	0.38673
28012-4	0.618087	0.381913
28013-4	0.619935	0.380065
28031-4	0.619445	0.380555
28045-4	0.626884	0.373116
28048-4	0.626584	0.373416
28052-4	0.627623	0.372377
28062-4	0.608224	0.391776
28071-4	0.62992	0.37008
28081-4	0.543493	0.456507
332098	0.462163	0.537837
28091-4	0.628529	0.371471
28096-4	0.606731	0.393269
28107-4	0.613636	0.386364
28109-4	0.622999	0.377002
332828	0.459352	0.540648
28110-4	0.625417	0.374583
28113-4	0.617352	0.382648
28133-4	0.625548	0.374452
28134-4	0.62059	0.37941
28137-4	0.61482	0.38518
28145-4	0.622583	0.377417
28146-4	0.620848	0.379152
28151-4	0.622471	0.37753
28165-4	0.619433	0.380567
28169-4	0.62056	0.37944
28172-4	0.544007	0.455993
28173-4	0.61162	0.38838
28182-4	0.611361	0.388639
28183-4	0.618762	0.381238
335750	0.463836	0.536164
28191-4	0.625744	0.374256
28193-4	0.545531	0.454469
28195-4	0.624167	0.375833
28198-4	0.606758	0.393242
28199-4	0.635792	0.364208
336116	0.450246	0.549754
336846	0.460552	0.539448
28222-4	0.629475	0.370525
28233-4	0.632096	0.367904
337577	0.46554	0.53446
28241-4	0.625583	0.374417
337942	0.474714	0.525286
28258-4	0.629719	0.370282
28287-4	0.626214	0.373786
28288-4	0.621383	0.378617
339403	0.472796	0.527204
28292-4	0.629194	0.370806
28295-4	0.617494	0.382506
339768	0.479844	0.520156
28300-4	0.62997	0.37003
28311-4	0.633737	0.366263
28325-4	0.640682	0.359318
28331-4	0.67889	0.32111
28336-4	0.575826	0.424174
28338-4	0.622545	0.377455
28341-4	0.620173	0.379827
28344-4	0.622172	0.377828
28345-4	0.632048	0.367952
28356-4	0.617429	0.382571
342325	0.461118	0.538882
28377-4	0.62011	0.37989
28383-4	0.626962	0.373038
28388-4	0.617597	0.382403
28390-4	0.613913	0.386087
28391-4	0.629418	0.370582
28411-4	0.63777	0.36223
344151	0.525289	0.474711
28420-4	0.649558	0.350442
28423-4	0.645445	0.354555
28436-4	0.564693	0.435307
28439-4	0.634421	0.365579
28443-4	0.617511	0.382489
345247	0.466116	0.533884
28462-4	0.615402	0.384598
28468-4	0.633973	0.366027
28471-4	0.626519	0.373481
28476-4	0.645912	0.354088
28495-4	0.608248	0.391752
28496-4	0.610376	0.389624
28505-4	0.633895	0.366105
28520-4	0.587172	0.412828
28522-4	0.571579	0.428421
28523-4	0.607036	0.392964
28528-4	0.568866	0.431134
348534	0.492483	0.507517
28545-4	0.473818	0.526181
28547-4	0.625764	0.374236
28549-4	0.652233	0.347767
348899	0.472594	0.527406
28550-4	0.624213	0.375787
28555-4	0.568015	0.431985
28557-4	0.644975	0.355025
28561-4	0.632689	0.367311
28567-4	0.583055	0.416945
28570-4	0.480125	0.519875
28579-4	0.65657	0.34343
28586-4	0.630343	0.369657
28588-4	0.65111	0.34889
28600-4	0.58742	0.41258
28601-4	0.607235	0.392765
28602-4	0.612027	0.387973
28604-4	0.629942	0.370058
28607-4	0.614606	0.385394
351091	0.669557	0.330443
28611-4	0.635058	0.364942
28614-4	0.623556	0.376444
28625-4	0.67001	0.32999
28627-4	0.609125	0.390875
28628-4	0.637781	0.362219
28632-4	0.593681	0.406319
28634-4	0.616122	0.383878
28640-4	0.606751	0.393249
28644-4	0.610743	0.389257
28648-4	0.561101	0.438899
28650-4	0.607012	0.392988
28655-4	0.659443	0.340557
28668-4	0.606337	0.393663
28669-4	0.63885	0.36115
28683-4	0.608568	0.391432
354013	0.544553	0.455447
28693-4	0.630221	0.369779
28699-4	0.604779	0.395221
354743	0.525216	0.474784
28721-4	0.627949	0.372051
28723-4	0.658568	0.341432
28727-4	0.558127	0.441873
28734-4	0.636887	0.363113
355839	0.463488	0.536512
28740-4	0.606683	0.393317
28742-4	0.632027	0.367973
28762-4	0.582207	0.417793
28766-4	0.604642	0.395358
28767-4	0.564394	0.435606
28773-4	0.664711	0.335289
28778-4	0.638901	0.361099
28781-4	0.361814	0.638186
28784-4	0.595727	0.404273
28785-4	0.665286	0.334714
28787-4	0.603242	0.396758
28792-4	0.354695	0.645305
28795-4	0.631728	0.368272
28798-4	0.595707	0.404293
28801-4	0.595793	0.404207
28806-4	0.56593	0.43407
28807-4	0.639524	0.360476
28809-4	0.639269	0.360731
28822-4	0.581336	0.418664
28826-4	0.663225	0.336775
28829-4	0.66303	0.33697
28831-4	0.6573	0.3427
28834-4	0.595516	0.404484
28839-4	0.559805	0.440195
28840-4	0.641186	0.358814
28844-4	0.638763	0.361238
28849-4	0.636296	0.363704
28850-4	0.597317	0.402683
28853-4	0.667183	0.332817
28860-4	0.609084	0.390916
28869-4	0.578932	0.421068
28871-4	0.652713	0.347287
28874-4	0.592452	0.407548
28875-4	0.60317	0.39683
28877-4	0.616636	0.383364
28881-4	0.585428	0.414572
28887-4	0.668808	0.331192
28889-4	0.640079	0.359921
28893-4	0.598268	0.401732
28902-4	0.627064	0.372936
28910-4	0.612417	0.387583
28911-4	0.669285	0.330715
28918-4	0.61486	0.38514
28921-4	0.584836	0.415164
28925-4	0.600088	0.399912
28927-4	0.612851	0.387149
28932-4	0.577895	0.422105
28934-4	0.599324	0.400676
28935-4	0.604674	0.395326
28936-4	0.616454	0.383546
28952-4	0.618264	0.381736
28961-4	0.603602	0.396398
28964-4	0.602763	0.397237
28969-4	0.608375	0.391626
28972-4	0.646583	0.353417
28973-4	0.583164	0.416836
28983-4	0.669827	0.330173
28988-4	0.598488	0.401512
28990-4	0.663349	0.336651
28992-4	0.639234	0.360766
28994-4	0.673118	0.326882
28995-4	0.659335	0.340665
28996-4	0.36009	0.63991
28997-4	0.664531	0.335469
28999-4	0.58633	0.41367
290-4	0.339067	0.660933
29000-4	0.641665	0.358335
29004-4	0.581662	0.418338
29011-4	0.618509	0.381491
29018-4	0.666015	0.333985
366065	0.465941	0.534059
29029-4	0.590049	0.409951
29038-4	0.480172	0.519828
29042-4	0.608639	0.391361
29047-4	0.611629	0.388371
367161	0.470736	0.529264
29055-4	0.615984	0.384016
29057-4	0.598763	0.401237
29058-4	0.620362	0.379638
29068-4	0.622379	0.377621
29084-4	0.668182	0.331818
29086-4	0.604513	0.395487
29097-4	0.618944	0.381056
368987	0.480558	0.519442
29107-4	0.624414	0.375586
29111-4	0.692084	0.307916
29116-4	0.616903	0.383097
29125-4	0.614924	0.385076
29132-4	0.675459	0.324541
29134-4	0.615963	0.384037
29135-4	0.608391	0.391609
29136-4	0.606875	0.393125
29140-4	0.615954	0.384046
29143-4	0.612442	0.387558
29150-4	0.615104	0.384896
29151-4	0.622682	0.377318
29156-4	0.629843	0.370157
29163-4	0.620318	0.379682
29171-4	0.610136	0.389863
29174-4	0.608341	0.391659
29175-4	0.635286	0.364714
29178-4	0.706324	0.293676
29179-4	0.605494	0.394506
29180-4	0.634823	0.365177
29203-4	0.635395	0.364605
29209-4	0.621596	0.378404
373005	0.466347	0.533653
29210-4	0.618224	0.381776
29213-4	0.615645	0.384354
29216-4	0.628528	0.371472
29218-4	0.616878	0.383122
29229-4	0.611858	0.388143
29240-4	0.620513	0.379487
29241-4	0.640553	0.359447
29245-4	0.680032	0.319968
29248-4	0.698363	0.301637
29256-4	0.618395	0.381605
29269-4	0.611779	0.388221
29270-4	0.696769	0.303231
29275-4	0.621077	0.378923
29276-4	0.617419	0.382581
29279-4	0.623781	0.376219
375562	0.476358	0.523642
29295-4	0.632227	0.367773
29296-4	0.697327	0.302673
29303-4	0.663613	0.336387
29304-4	0.67372	0.32628
29306-4	0.619551	0.380449
29307-4	0.61857	0.38143
29308-4	0.619476	0.380524
29309-4	0.626819	0.373181
29312-4	0.616185	0.383815
29317-4	0.631863	0.368137
29321-4	0.616637	0.383363
29323-4	0.622468	0.377532
29324-4	0.615767	0.384233
29333-4	0.624058	0.375942
29334-4	0.619747	0.380253
29343-4	0.619961	0.380039
29352-4	0.617126	0.382874
29367-4	0.622129	0.377871
29373-4	0.617788	0.382212
29385-4	0.618627	0.381374
29387-4	0.625355	0.374645
29392-4	0.621918	0.378082
29393-4	0.619508	0.380492
29395-4	0.620736	0.379264
29398-4	0.632264	0.367736
29399-4	0.629829	0.370171
29402-4	0.623177	0.376823
29404-4	0.618811	0.38119
29408-4	0.617641	0.382359
29417-4	0.668301	0.331699
29419-4	0.629654	0.370346
29432-4	0.620175	0.379825
29441-4	0.622447	0.377553
29444-4	0.618424	0.381576
29448-4	0.62583	0.37417
29449-4	0.632799	0.367201
29452-4	0.632407	0.367593
29454-4	0.623976	0.376024
29461-4	0.583989	0.416011
29463-4	0.617012	0.382988
29464-4	0.664547	0.335453
29466-4	0.673578	0.326422
29470-4	0.631073	0.368927
29471-4	0.639369	0.360632
29473-4	0.620077	0.379923
29480-4	0.626297	0.373703
29483-4	0.620207	0.379793
29491-4	0.640421	0.359579
29493-4	0.622033	0.377967
29495-4	0.669381	0.330619
29504-4	0.625533	0.374467
29511-4	0.633409	0.366591
29513-4	0.662686	0.337313
29523-4	0.701101	0.298899
29525-4	0.638589	0.361411
29529-4	0.652836	0.347164
29533-4	0.58078	0.41922
29537-4	0.624015	0.375985
29538-4	0.621872	0.378128
29539-4	0.635473	0.364527
29553-4	0.635178	0.364822
29554-4	0.661874	0.338126
29559-4	0.639599	0.360401
29560-4	0.658854	0.341147
29566-4	0.577735	0.422265
29567-4	0.646039	0.353961
386154	0.485464	0.514536
29573-4	0.64273	0.35727
29576-4	0.579243	0.420757
386519	0.621974	0.378026
29581-4	0.621845	0.378155
29582-4	0.664475	0.335525
29585-4	0.622527	0.377473
29587-4	0.641833	0.358167
29590-4	0.643773	0.356227
29591-4	0.659641	0.340359
29594-4	0.645826	0.354174
29601-4	0.584264	0.415736
29603-4	0.622418	0.377582
29604-4	0.636339	0.363661
29606-4	0.624793	0.375207
29607-4	0.653761	0.346239
29613-4	0.618704	0.381296
29622-4	0.64433	0.35567
29623-4	0.648257	0.351743
29625-4	0.579571	0.420429
29631-4	0.630093	0.369907
29642-4	0.662817	0.337183
29644-4	0.624197	0.375803
29645-4	0.625285	0.374715
29646-4	0.646222	0.353778
29651-4	0.625683	0.374317
29652-4	0.618185	0.381815
29660-4	0.674752	0.325248
29661-4	0.666934	0.333066
29663-4	0.618505	0.381495
389806	0.681779	0.318221
29673-4	0.72642	0.27358
29674-4	0.638454	0.361546
29678-4	0.625041	0.374959
29688-4	0.643699	0.356301
29692-4	0.65141	0.34859
29698-4	0.628086	0.371914
29700-4	0.65932	0.34068
29702-4	0.626643	0.373357
29710-4	0.62001	0.37999
29711-4	0.624041	0.375959
29717-4	0.648379	0.351621
29723-4	0.658895	0.341105
29734-4	0.617393	0.382608
29735-4	0.623146	0.376854
392363	0.506168	0.493832
29740-4	0.663401	0.336599
29744-4	0.626503	0.373497
29754-4	0.624251	0.375749
29756-4	0.634313	0.365687
29761-4	0.618388	0.381612
29763-4	0.756713	0.243287
[truncated: 3,950 more rows]

## Sheet: S20
Supplementary Table S20: Gene embeddings for tumor cell, fibroblasts and neutrophil associated gene module in the BRCA dataset
Gene	Tumor Module1	Tumor Module2	Tumor Module3	Fibroblast Module1	Fibroblast Module2	Fibroblast Module3	Neutrophlil Module1	Neutrophlil Module2
AATK	2.97762	2.82078	3.98706	1.64523	2.35066	2.57452	1.66387	1.65781
ABL1	3.68567	4.87002	3.83168	5.00331	2.79302	3.36958	1.57017	1.66359
ABL2	5.12524	4.62665	4.79085	4.16107	2.96889	3.31803	2.32766	1.43138
ACE	2.85931	3.8401	4.05917	2.02946	2.83543	2.53325	1.9407	1.17223
ACE2	3.34141	2.40939	4.53976	1.43625	3.21753	1.69532	1.51994	1.91491
ACKR1	2.84594	2.05921	4.15822	1.08236	2.98068	1.30879	1.38285	2.00476
ACKR3	5.74597	2.69379	4.30728	3.35994	2.29856	3.13029	1.3454	1.85548
ACKR4	3.10362	2.86767	4.3876	2.27815	2.66239	2.61961	1.49193	2.1493
ACTA2	2.98008	3.00557	3.92348	1.22428	4.19058	5.01539	1.48444	1.21667
ACTG2	2.69403	1.94095	4.12057	0.954481	2.0916	3.72293	1.00717	1.62012
ACVR1	2.26598	4.02764	4.08667	3.34972	2.69766	3.49555	1.00471	1.67378
ACVR1B	4.27239	4.32224	3.98973	3.26253	3.31004	3.00704	2.53892	1.56509
ACVR2A	3.33981	4.70438	3.35923	3.09911	2.90774	2.04883	1.65995	1.33333
ACVRL1	2.34525	2.84074	4.34592	4.4017	3.29443	2.49242	2.07213	1.52493
ADGRA2	2.19511	4.21829	4.2466	3.82689	3.45572	3.7401	1.51067	2.24553
ADGRA3	4.57795	5.41367	2.20211	3.46567	2.63634	3.86478	1.50095	1.62996
ADGRB2	2.573	2.68267	3.71485	1.51971	2.74506	2.07416	1.17835	1.29607
ADGRB3	2.82381	2.37963	4.14736	1.52454	2.74531	2.72288	1.31113	1.72303
ADGRD1	3.89775	2.04745	4.03007	1.25059	2.83167	2.43999	0.948576	1.58916
ADGRE1	2.39735	2.04022	3.72001	1.05213	2.31361	1.11475	0.881265	1.46014
ADGRE2	2.98363	1.79779	4.26906	3.76151	2.21095	3.01197	1.73353	2.01021
ADGRE5	5.74763	4.31537	4.86104	2.62812	3.22804	2.64736	2.49761	2.11384
ADGRF1	4.67692	1.97813	4.47356	2.25792	2.94568	1.31748	1.46516	1.94135
ADGRF3	2.37675	2.81865	4.17488	1.60044	2.79992	1.95493	0.944045	2.04749
ADGRF4	2.92434	1.95146	4.12077	1.18405	2.15562	2.36119	1.15616	1.52972
ADGRF5	4.48283	3.55912	3.70685	2.31518	3.43089	1.84941	1.82273	1.77803
ADGRG1	1.6978	5.21872	4.18465	2.35333	3.12638	1.57126	2.33108	1.46483
ADGRG2	2.42172	2.19754	3.36684	1.30939	2.13875	1.58204	1.01276	0.705178
ADGRG3	2.94774	2.63625	4.45722	1.6945	3.01671	1.35282	2.96395	1.64941
ADGRG5	2.26723	2.13108	4.14043	1.08745	2.5555	2.35719	1.09409	1.60922
ADGRG6	2.65301	3.35668	4.06083	1.55091	2.51607	2.59877	0.950585	1.78442
ADGRL1	4.79964	5.95695	2.678	2.94255	3.12621	1.94675	0.772338	2.48793
ADGRL2	3.34961	5.08725	4.95418	1.85892	2.82956	3.21211	1.70747	1.41814
ADGRL4	2.68536	2.51	3.96213	1.88383	2.57496	2.02159	0.950103	1.69646
ADGRV1	1.70235	4.23689	3.3738	1.11438	1.9834	2.37984	0.70475	1.42432
ADIPOQ	2.72088	2.62731	4.22138	1.42111	2.53692	2.69125	1.82238	1.58237
ADIRF	2.88591	3.81901	4.71365	3.20148	3.53422	2.69283	1.82301	1.73268
ADM2	3.57132	2.76528	4.05153	1.88266	2.70534	2.16139	1.83177	1.6962
ADORA2A	3.0699	2.93478	4.34726	1.4469	2.85835	2.38529	2.4509	2.08348
AGR2	2.05633	6.06855	2.87221	2.1091	1.96523	3.03608	0.990361	1.50377
AHI1	1.88749	5.19156	4.38964	3.48743	2.67978	3.84809	1.35111	2.21725
AHR	2.10844	5.55992	3.24753	3.03854	3.09834	3.73241	1.81819	1.50901
AKT1	4.00137	6.79546	4.48695	4.75405	3.2045	3.35464	1.59473	2.27867
ALCAM	3.24568	6.94909	4.82005	2.5305	3.53075	3.67603	2.27865	2.29219
ANGPT1	2.86304	2.72505	4.1674	3.15507	3.31284	1.14939	1.54192	1.69962
ANGPT2	2.59815	2.33687	3.66825	2.62685	1.60212	2.96561	1.01501	1.08529
ANGPT4	2.76128	2.06031	3.78533	1.71566	2.52355	1.03376	1.09167	1.40392
ANGPTL1	3.2353	3.40064	4.58039	1.64424	3.33943	2.34368	2.09438	1.76934
ANXA1	6.2553	2.37141	4.89341	3.80166	3.56035	3.10973	2.355	1.32465
ANXA2	7.22243	3.00095	6.16149	5.05128	4.00424	4.82229	2.57296	2.26247
ANXA4	6.20343	5.02398	5.18769	2.95114	2.96297	3.67725	1.30085	2.04478
APOA1	2.43734	2.97132	4.08632	1.3405	3.0286	1.70936	1.33484	1.19604
APOB	2.53413	1.91254	4.18148	1.09627	2.12098	2.45182	0.504723	1.95558
APOD	2.99059	2.66559	4.2858	4.49022	2.93697	1.29364	1.41148	2.16343
APP	5.18944	6.79462	3.56531	5.68246	4.072	4.39586	2.372	1.92433
AQP3	4.74266	2.19618	4.40816	1.73768	3.39091	1.50299	1.96244	1.84977
AR	2.74281	2.48291	4.03881	2.82567	1.90086	3.48774	1.23148	1.61033
AREG	3.20198	2.22013	4.30355	2.94269	2.8401	2.51746	1.99898	1.58398
ARF1	6.09838	6.41167	3.95205	5.34354	3.64271	4.22437	2.44503	2.74309
ARG1	3.14568	2.11746	4.02082	1.02714	2.24779	2.38966	1.05711	1.73552
ARHGDIB	2.64011	3.31017	3.88327	3.21042	3.2838	0.860582	2.10132	0.824133
ARTN	3.86467	3.34282	4.39623	1.29387	2.61836	2.89013	1.5542	1.64629
ATF3	5.26869	1.77254	4.75657	2.42302	3.24268	1.19339	1.85795	1.6836
ATG10	3.53043	3.36758	4.49888	2.54563	2.89384	3.16703	1.31527	2.53367
ATG12	3.67999	4.41131	4.90148	3.21007	3.32854	3.3598	2.35834	1.95338
ATG5	3.11375	5.27332	3.95745	3.31561	3.17359	2.7532	1.81995	1.68983
ATM	2.68838	3.56599	4.00035	3.13688	2.97898	3.25748	1.8772	1.16685
ATR	3.14746	4.86348	4.1768	3.57539	2.29098	2.998	1.52269	1.91027
AXL	2.89237	2.70439	4.12625	4.13149	2.90793	3.43151	1.62823	1.93951
AZGP1	2.61221	1.8841	4.18578	1.21961	2.4051	2.15715	1.26693	1.82506
AZU1	3.18458	3.0799	4.9188	1.39243	3.10373	2.34184	1.76371	1.57223
B2M	4.51833	6.3255	7.59417	7.85129	5.43243	4.92673	4.95446	3.08248
B3GNT7	5.99908	2.23776	4.95479	1.77238	2.67919	1.95404	1.15071	1.74363
BAG3	4.75166	3.95339	4.38608	3.67863	2.864	2.90566	1.16696	1.87202
BATF3	2.84462	2.71337	3.85378	2.30861	2.20047	3.23202	1.69819	1.60062
BAX	2.39293	5.78369	3.74805	4.82115	3.71536	4.10007	3.23069	1.67453
BCL2	4.65946	6.93448	5.15837	3.75165	4.02939	3.25375	2.34782	2.34815
BCL2L1	5.83607	5.53934	5.33946	4.9269	4.10065	4.18315	3.36337	2.18814
BECN1	4.01261	4.70424	3.93319	3.98923	3.05185	2.08023	2.03926	1.65159
BEST1	3.0263	2.22027	4.05515	1.76103	3.09382	1.70604	2.39506	1.42327
BGN	2.2141	6.06552	2.76932	5.85421	5.71418	6.75833	3.14845	1.23434
BID	3.49378	4.6104	5.03757	3.35087	3.36027	3.83184	2.59949	2.12665
BIRC5	1.96339	5.93532	3.50881	3.04717	3.27731	3.70777	1.9747	2.06852
BMP1	1.96761	4.61927	4.14595	5.99252	3.5327	4.4598	2.03245	1.86839
BMP2	2.92727	2.42724	4.16974	2.06365	2.74353	2.94227	0.849558	2.12639
BMP3	4.62113	3.29056	4.99443	1.79298	3.02104	1.61267	1.1337	2.61837
BMP4	2.40288	2.8093	4.6026	1.40728	2.63338	3.70106	1.71929	1.83338
BMP5	3.11749	3.39278	4.04393	1.22608	3.42469	2.6331	1.72919	1.65512
BMP6	3.12515	2.63488	4.28259	1.40872	2.91494	1.8671	1.29788	2.1805
BMP7	5.32456	5.53506	2.99798	3.45006	3.17988	1.40889	0.964219	2.42375
BMPR1A	4.49013	5.2956	3.32171	3.45936	3.19071	2.66062	2.23049	2.37152
BMPR2	2.40119	5.14333	4.25308	2.2909	3.20971	3.83507	1.35837	1.57787
BMX	1.68127	3.8257	4.2781	1.57681	2.27764	2.92436	1.5186	1.54807
BRCA1	2.09098	4.21998	4.19735	2.31688	2.62128	3.1133	1.77876	1.78102
BST1	2.68077	2.14321	4.27445	1.03549	3.18653	2.61315	2.54346	1.5777
BST2	2.42838	1.96952	5.39998	5.28675	2.70558	3.30457	2.8324	1.33206
BTG1	6.03049	4.85637	4.86064	4.35024	4.24567	1.39728	3.27578	0.871291
BTK	2.93326	2.73007	4.53165	2.99821	3.0609	1.93215	2.45186	1.83076
C11orf96	4.08829	2.81604	5.0303	4.77265	5.21561	2.86395	3.03835	1.76858
C1QA	3.21508	3.51735	5.20722	5.49744	4.20502	1.57609	4.02532	1.16061
C1QB	2.48991	2.25243	4.9435	5.03315	3.39136	3.04965	3.54506	0.863329
C1QC	2.46167	3.68204	5.18978	5.53006	3.72456	3.47882	3.90441	0.602271
C5AR2	2.69669	2.80552	4.12298	1.85143	2.83291	1.53309	2.87201	1.90013
C9orf16	2.88053	5.26747	5.1031	4.44965	4.13648	3.24486	3.02178	2.05019
CALB1	3.88242	2.88809	4.61903	1.50558	2.92565	3.14173	1.78001	2.18411
CALD1	3.83924	4.7569	5.74094	6.39301	4.46774	6.25582	2.27806	1.8753
CALM1	2.28791	5.45751	1.62903	4.02722	2.77854	3.42788	1.58075	1.88386
CALM2	3.76018	7.12984	4.35375	4.63931	3.27434	5.40243	2.80515	2.68243
CALM3	2.35242	5.81616	3.26356	4.51794	3.87049	4.03283	2.49837	1.86412
CAMP	2.74738	2.68628	4.3462	2.35239	3.11898	1.59192	2.6908	1.82717
CASP3	2.97915	4.47135	4.24514	3.50492	2.8395	2.84648	1.80466	1.79733
CASP8	3.76922	4.38451	4.60312	3.73391	3.24759	2.01933	2.08368	1.0967
CASR	3.57573	2.54364	4.70091	1.5227	3.16681	2.9912	2.10036	2.16723
CAV1	3.33235	2.5829	4.83792	4.44933	4.17963	2.79903	2.73004	2.23411
CCL11	2.66303	2.8604	4.20141	4.95689	0.636771	4.24864	1.74966	1.36366
CCL13	3.57359	2.88224	4.39001	2.90786	3.2008	1.14752	1.80142	1.82746
CCL15	2.98248	3.27835	4.32676	1.52539	2.91641	2.49794	1.50767	2.03986
CCL18	2.42714	2.43778	4.49624	4.21179	3.07948	0.976061	3.09847	0.79918
CCL19	2.78692	2.84912	4.1757	0.995906	4.0912	0.630122	2.01345	1.65664
CCL2	2.91856	1.57108	5.3342	5.96365	4.11204	2.9197	2.55059	1.85208
CCL20	5.61829	1.23875	4.67902	2.08143	2.67025	2.76308	1.24531	2.44908
CCL21	3.51344	3.92666	5.06055	3.4456	4.20243	1.61192	2.36425	2.08763
CCL23	2.92413	2.2252	4.38563	1.46646	2.87947	2.31424	1.74585	1.73316
CCL26	2.80354	2.40445	4.40301	2.5842	3.11591	1.94062	1.7686	2.15675
CCL28	5.14861	2.68218	4.66807	2.38792	2.73128	2.21922	1.09187	2.37958
CCL3	2.61879	2.15633	4.64297	1.96799	3.12494	2.53072	2.34844	3.50142
CCL3L3	2.88604	2.49474	4.71792	2.26779	3.545	1.50933	3.56352	3.32807
CCL4	2.50365	1.675	4.36621	2.34669	2.84762	1.86417	2.39638	3.29787
CCL4L2	3.37516	1.93504	4.62036	2.05	3.04957	2.949	2.59672	3.64622
CCL5	2.27809	2.30855	4.92269	4.59249	3.56624	1.54154	2.27521	2.0161
CCL7	2.59028	2.51728	3.91105	1.7396	2.22663	2.2248	1.49805	1.19041
CCL8	2.7654	2.19277	4.35002	3.21583	2.77239	2.56385	1.42697	1.55177
CCND1	4.97658	3.88936	7.05798	4.95865	3.41436	4.40179	2.38579	2.3612
CCR1	3.8675	2.52533	4.76618	3.00923	3.70116	2.42802	2.95821	2.62054
CCR10	3.37667	3.07017	4.41853	2.09317	3.27077	2.74533	2.45586	1.72202
CCR2	3.09599	2.27789	4.01079	0.96734	2.5852	2.49382	1.92266	1.69755
CCR5	2.21267	1.87325	4.32151	1.19106	2.93384	1.96632	2.37524	1.57612
CCR7	3.82521	3.17201	4.48795	1.38818	3.33733	2.80874	2.07488	1.84052
CCRL2	2.79028	2.24516	4.20971	1.41451	2.99456	2.66262	2.38697	2.20089
CD14	3.07934	3.08258	5.01545	4.6896	3.51458	3.33554	3.47002	2.1003
CD163	2.47565	2.56269	4.51163	4.57909	3.62637	0.900963	3.44094	0.392111
CD164	4.1817	5.00316	3.18263	4.0606	2.72935	2.69073	1.83442	1.56355
CD19	3.22649	3.74665	4.74679	1.97537	3.43432	3.15084	2.03675	2.5963
CD2	3.17696	2.53236	4.59588	3.26221	3.45636	1.80264	2.19336	1.77688
CD209	3.63334	3.54129	4.39434	3.41892	3.10707	1.76867	2.34407	2.24843
CD24	6.02321	6.90302	3.5563	4.20629	2.67951	3.54535	1.8069	2.80333
CD27	2.67032	3.00362	4.35911	1.57385	3.42016	1.86794	2.78533	1.62834
CD274	2.87621	2.20169	4.67051	1.89608	3.29006	2.55611	3.08133	1.57332
CD276	3.91345	6.4004	5.54914	5.37802	3.82791	4.11603	2.00478	2.5324
CD28	2.96748	2.50369	4.32271	1.19644	3.28745	2.35183	1.56854	2.16588
CD300A	2.90911	2.21572	4.45339	2.30518	3.2918	1.72205	2.62283	2.2233
CD33	3.02227	2.36901	4.12453	2.07721	2.71391	1.49912	1.21524	2.19472
CD34	2.7584	3.22441	4.5445	3.454	3.56661	2.34552	2.05538	2.22332
CD36	2.26668	2.67073	4.16375	1.33607	2.95321	2.65076	2.02014	1.47428
CD37	2.31747	2.29742	4.53276	1.89028	3.56212	1.76636	2.29558	1.85029
CD38	3.39615	2.53117	4.45525	2.09826	3.42706	1.89791	2.24119	1.49474
CD3D	2.40737	2.56139	4.45516	2.79685	2.92603	1.68264	1.79364	1.69894
CD3E	4.59137	4.43719	5.64527	3.18788	4.17082	3.36179	2.73032	2.68918
CD3G	3.44208	2.17447	4.24591	1.30933	3.11027	1.81677	1.73966	1.66444
CD4	1.68435	4.01005	4.05018	2.68452	3.84579	2.97656	2.21338	1.57864
CD40	4.70151	5.75551	6.43321	4.59197	3.23386	2.6193	2.38903	2.26253
CD40LG	2.21178	2.57457	4.03998	2.07053	3.02401	1.94749	1.70701	1.77846
CD44	4.29636	4.86325	5.59667	5.14117	4.65079	3.28709	3.55436	2.89711
CD47	6.63096	2.43692	5.83386	4.33652	3.42561	1.68722	2.29996	2.13764
CD48	2.71278	2.44009	4.83875	2.91359	3.76228	1.9905	2.84957	2.34949
CD52	2.94381	3.33358	4.32021	1.37726	3.46021	1.66539	2.51344	1.52328
CD53	2.96599	1.70456	4.71717	2.24207	4.06201	2.35257	3.59462	2.46795
CD55	6.01272	4.46474	5.00047	3.49734	3.50303	3.63036	3.05252	2.30956
CD58	3.93486	3.58758	4.61477	2.91125	3.05891	1.90327	2.62765	1.84789
CD59	5.7409	4.4168	4.84591	4.82669	3.66664	2.12396	2.04	2.13808
CD5L	2.86951	3.12956	4.37019	2.45441	3.28148	1.79437	1.53045	2.17508
CD63	5.16631	7.13076	4.30474	6.56385	4.9092	5.11047	3.58991	2.9346
CD68	2.86205	2.42908	5.33538	5.43821	4.10898	1.41882	4.19372	2.44793
CD69	5.91509	2.09315	6.03015	2.34598	3.61681	1.54351	2.44195	2.51031
CD70	3.48923	3.19483	4.76608	1.59826	3.16092	3.14899	2.09314	2.24741
CD74	4.45023	6.51847	7.08844	5.79652	5.57603	3.31014	4.83494	1.39414
CD79A	2.78043	2.42922	4.36255	0.893973	3.07714	1.92768	2.23542	2.27594
CD80	2.59159	2.61764	4.29175	1.44293	2.8666	3.16084	1.95737	1.88641
CD81	3.85363	7.22594	3.9462	5.64266	4.70063	4.72686	3.16188	2.0935
CD83	3.40775	3.39888	6.33058	3.14603	3.60495	1.99527	2.47315	3.24662
CD84	2.93662	2.14603	4.53449	1.55816	3.28748	1.67022	2.51172	1.96769
CD86	3.14553	2.65837	4.15722	1.17481	1.94716	3.33061	1.81889	1.97225
CD8A	3.08586	2.86161	4.69421	1.83582	3.17949	3.03852	1.59138	2.52432
CD8B	2.94579	2.95988	4.13932	1.89923	2.6117	1.77953	1.04946	1.91974
CD9	6.23964	5.81838	5.52038	2.15645	3.08585	3.85651	2.6802	1.87624
CDH1	5.35958	4.31089	4.75705	2.21165	3.22191	1.87389	1.77	1.99014
CDH11	1.88358	3.61666	3.63553	2.51423	3.91879	5.69482	1.31705	1.48016
CDH5	1.5881	5.38152	3.19966	2.0261	3.63188	1.88338	2.02127	1.86565
CDKN1A	5.90039	5.21933	3.30566	4.7458	3.6626	4.14156	2.65139	2.5457
CDKN3	1.92179	4.55132	4.51706	1.50579	3.55466	2.07056	2.29106	1.9387
CEACAM1	3.07597	2.21257	4.51673	1.49065	1.86455	2.51984	1.69503	1.2131
CEACAM6	2.40655	1.86875	4.18757	1.28917	2.92759	1.98099	2.10006	1.54778
CELSR1	5.71477	5.31587	5.15206	1.57259	3.14427	3.67844	2.09431	1.8388
CELSR2	3.17474	4.72665	3.84286	1.57495	2.86234	2.45695	1.63416	1.86055
CENPF	2.10051	5.68945	2.56066	1.89601	2.13387	3.05125	0.796565	1.60331
CFD	3.16099	3.22348	4.39779	0.777103	4.12657	0.569104	3.01267	1.34374
CFLAR	4.59252	4.94041	4.8083	4.8798	3.50956	1.79438	2.64503	1.94031
CHEK1	2.43066	5.7304	3.36343	3.03931	3.07646	2.88195	0.912526	2.2867
CHEK2	1.70395	4.9359	4.33708	2.6846	3.45464	3.06372	2.38872	1.92721
CHGA	3.00571	2.17451	4.2318	1.57874	2.07817	2.4865	0.819153	1.78431
CHI3L1	5.10962	5.24409	3.29183	4.77004	2.75604	1.85245	1.91182	2.09534
CIDEA	3.40415	3.21972	4.63458	1.90884	3.14556	1.54622	1.5817	2.23269
CIITA	2.13407	1.70046	5.47766	1.46866	3.7627	2.24443	2.77764	1.02696
CLCF1	2.58848	4.95764	4.48619	3.81945	3.48953	1.95729	2.78919	2.04943
CLDN4	7.81954	6.50405	6.68888	3.72543	3.46512	3.55385	1.79752	2.9446
CLEC10A	2.45793	2.7094	3.96111	1.93008	2.84382	1.72986	1.27895	1.43761
CLEC12A	2.89067	2.76456	4.5431	1.29618	3.31344	2.50166	2.5647	2.1551
CLEC14A	3.59316	2.73087	4.44555	1.07419	3.03869	2.88331	1.75867	1.91009
CLEC1A	2.57328	2.67867	4.09428	2.82409	2.98583	1.07899	2.60182	1.24294
CLEC2B	2.16676	2.06654	4.1087	3.50011	2.97278	2.12544	2.00309	1.66494
CLEC2D	2.1102	3.35734	4.13901	2.15941	2.92956	2.70751	1.88203	1.09558
CLEC4A	3.27625	3.34657	4.54954	2.61623	3.15369	3.1833	2.53364	2.23701
CLEC4D	3.57148	2.60348	3.98553	1.18141	2.38255	2.35793	2.40913	1.25164
CLEC4E	2.7378	2.75186	4.19931	3.36724	2.94165	1.42183	2.6992	1.97742
CLEC5A	2.95072	2.54314	4.27204	1.73932	2.95752	1.56083	2.36201	1.80463
CLEC7A	2.96072	2.67635	4.28481	2.60062	2.94663	1.72841	2.83362	1.85543
CLOCK	3.86937	5.36642	3.87005	3.19676	2.63764	2.64513	0.783917	2.2123
CLU	5.27343	3.8211	4.93531	1.41368	4.31048	0.751037	2.38398	1.13774
CMKLR1	3.02818	3.09824	4.58436	1.28679	2.81113	2.86504	1.61387	1.68326
CNTFR	3.15607	3.43461	4.50074	1.33643	3.3374	2.09006	1.60842	2.22339
COL11A1	2.51887	2.51678	4.08075	1.36486	0.834045	5.53179	1.47448	1.72194
COL12A1	4.74245	2.51279	4.32635	6.54372	1.07841	2.11681	1.53684	1.71609
COL14A1	2.33273	3.79194	3.61392	1.51962	3.89467	0.998288	1.26966	1.96539
COL15A1	2.56184	3.08742	4.30303	4.25235	2.24856	4.3382	1.55392	1.93014
COL16A1	4.59464	2.88435	4.58044	4.81409	3.54362	5.64271	1.75892	1.53255
COL17A1	5.87859	3.51588	3.0857	2.02347	2.57695	2.66378	1.38596	1.95517
COL18A1	4.01557	6.65446	4.03791	6.16868	3.52401	4.88726	2.52809	2.14431
COL1A1	2.86425	6.63656	6.61465	7.52421	5.65324	9.02083	3.92168	2.5071
COL1A2	1.58288	5.91626	5.27459	6.8058	4.12263	7.87718	2.62344	1.83582
COL21A1	2.46612	1.97646	3.9316	1.1528	2.77045	1.45414	1.00981	1.61461
COL27A1	5.67605	5.35688	5.52192	5.40247	3.77448	2.70743	1.98952	1.82678
COL3A1	1.39906	4.02409	5.30384	8.00185	6.09236	8.05472	3.18362	1.78261
COL4A1	3.02627	5.13702	5.11148	5.85006	5.20852	4.56859	2.74862	1.42916
COL4A2	3.37497	6.2629	5.42699	6.5638	6.03182	4.6732	3.21046	1.93805
COL4A5	2.52966	2.41676	4.19424	1.22418	2.65327	3.90492	1.99951	1.71215
COL5A1	5.57775	4.38624	5.04796	4.64944	4.42468	6.28168	1.75147	1.59622
COL5A2	3.54336	3.55782	4.71296	6.00617	4.31693	5.50041	1.6041	1.62492
COL5A3	3.60621	2.79774	4.76519	5.89656	3.0923	4.31163	0.766516	2.87048
COL6A1	7.65099	5.4109	2.50589	8.01557	3.58802	5.48635	2.12314	2.0938
COL6A2	7.7003	5.83069	2.78795	8.28127	4.18167	5.63132	1.85725	2.04882
COL6A3	2.05351	3.33588	4.63914	7.44144	4.90957	6.76195	2.13876	1.6499
COL8A1	2.7824	2.63489	4.45863	3.65458	3.07566	5.52028	1.96499	1.91857
COL9A1	3.67595	3.19768	4.1844	1.22447	2.68379	2.85541	1.54595	1.89032
COL9A2	4.47293	6.08361	6.70084	3.07455	5.49615	5.30981	3.83401	4.09556
COL9A3	1.82788	5.13197	3.50901	2.35138	3.31589	2.20657	2.13583	2.06054
COTL1	2.65231	5.75159	5.98187	3.67926	3.97679	4.20828	2.95499	1.97892
CPA3	2.63521	2.68278	4.04571	1.45132	2.85097	2.23044	0.747068	2.00023
CPB1	2.29837	1.80576	4.02645	1.13916	2.83468	1.44378	1.2168	1.64721
CRIP1	3.43587	4.34697	4.82335	4.29661	3.18438	3.44549	2.36757	2.54656
CRP	5.09796	4.31172	4.17291	3.23143	3.1541	2.35788	0.889795	2.48277
CRYAB	4.17469	1.83208	4.40534	2.3342	3.61021	3.69921	1.83659	1.37752
CSF1	5.26585	1.88471	5.40575	4.68057	2.70176	3.90581	2.47428	2.18769
CSF1R	3.39283	1.87266	4.43095	2.15858	2.68537	2.99882	1.86662	1.95281
CSF2	3.21855	2.50248	4.45696	2.37332	3.09786	2.40336	2.12326	1.62241
CSF2RA	2.8613	3.02007	4.56899	1.42108	3.40419	2.41275	3.1508	1.45124
CSF2RB	3.34469	2.15299	4.27296	1.5904	2.89361	2.64755	2.71863	1.58391
CSF3	2.57732	3.94504	4.9926	4.86686	3.22599	0.728586	2.41424	2.05045
CSF3R	2.82471	2.4272	4.04059	1.02607	3.08392	0.979712	3.64093	1.27362
CSHL1	2.60917	2.83235	4.30255	1.08305	2.86626	1.6271	1.77423	2.27739
CSK	4.51986	6.29603	3.18966	4.01288	3.2893	3.53539	2.65595	2.19212
CST7	2.79799	2.31367	4.3301	2.07289	3.03253	1.64854	1.85011	1.91694
CTLA4	2.54373	2.51332	4.1718	1.35882	2.6164	2.72281	1.37166	1.36174
CTNNB1	6.22771	6.55308	4.12813	5.68474	1.82096	5.6491	2.34756	2.01253
CTSG	2.63169	4.9376	5.18656	3.16036	3.93149	3.17974	2.57096	2.25983
CTSW	2.70417	2.60445	4.40191	1.55987	2.89411	2.4025	2.24955	1.89181
CUZD1	2.6223	3.42244	4.44219	1.58412	2.79302	2.75229	2.17205	1.88475
CX3CL1	5.13482	1.39372	5.19981	3.01096	3.17674	2.45245	1.49074	1.66663
CX3CR1	2.87476	1.85898	4.2842	1.48432	2.92972	2.20119	2.24342	2.07829
CXCL1	7.17812	1.00429	5.096	5.57486	2.73612	0.967418	2.58169	3.11251
CXCL10	2.4416	1.42641	6.70575	5.4462	3.3215	0.815266	1.84127	2.76654
CXCL12	4.99741	4.71286	5.27319	5.24165	3.35191	5.39533	2.20019	2.08788
CXCL14	4.73266	4.12517	5.18599	2.11213	3.29594	3.04344	1.38575	2.00887
CXCL16	5.62969	1.42571	5.28439	3.94367	3.45854	1.33984	3.49353	2.01431
CXCL17	4.10068	2.79203	4.52259	1.09111	2.61628	2.61741	1.76415	1.668
CXCL2	6.32782	1.35105	5.08264	4.53277	3.69318	0.913216	2.95697	2.81079
CXCL3	7.22428	1.33885	5.4684	5.42484	3.39108	0.691166	2.68869	3.42977
CXCL5	4.8429	2.14959	4.64936	4.84028	2.21928	1.01216	1.2163	2.64326
CXCL6	3.67591	2.40956	4.50426	4.86057	1.67986	2.15094	2.50502	2.02998
CXCL8	4.94262	1.30705	4.91417	4.39425	3.46298	0.877992	2.74606	5.59465
CXCL9	2.48642	1.72856	4.99332	3.05377	3.18021	2.60331	1.70018	2.2754
CXCR1	2.5215	2.04796	4.15409	1.14844	3.00879	1.33171	2.62969	2.13622
CXCR2	2.92648	2.71018	4.23755	1.74437	2.94193	1.74386	3.01029	1.85534
CXCR3	3.79047	2.51097	4.13579	2.21475	2.97803	1.48882	1.04914	2.05151
CXCR4	6.99697	4.31943	2.80489	1.8156	3.91763	0.896884	3.30138	2.88482
CXCR5	2.61315	2.41133	4.61836	1.27817	3.33256	2.66378	2.69271	2.21961
CXCR6	2.43235	2.30376	4.50623	1.7181	3.30463	2.30316	2.27551	1.81908
CYP19A1	2.44629	2.00267	3.83504	1.49896	2.36558	1.49416	1.36133	1.32069
CYP1B1	3.67991	2.97623	4.34983	0.969582	4.20574	3.4279	1.31885	2.26285
CYSTM1	4.77956	4.62116	4.63589	3.30263	3.34538	3.21584	2.00614	2.57297
CYTOR	5.86543	4.40272	6.01175	5.63028	4.85636	4.85896	3.78721	2.93983
DCN	2.42559	2.73164	4.37893	7.62288	4.89502	4.05007	2.33405	1.68271
DDC	3.4894	3.85736	4.64028	1.39092	3.4143	2.25782	1.8189	2.13393
DDIT3	6.301	4.30502	5.05095	3.42612	3.01983	2.50445	1.43351	2.50758
DDR1	6.28569	6.71678	5.18722	3.72546	3.90731	3.15382	2.49489	2.54678
DDR2	3.34976	2.8101	4.35366	5.1845	3.43846	3.51739	1.60003	2.16222
DDX58	4.33263	1.36625	5.59624	5.22188	2.62682	0.862981	2.25357	1.75004
DHRS2	3.1891	2.69027	4.62943	1.41818	3.09633	2.41254	2.04943	2.4842
DLL1	3.55094	3.15163	4.91165	4.84548	3.26318	2.49982	2.2073	2.11394
DMBT1	2.86589	2.52602	4.39006	1.08433	3.53021	0.98574	2.90696	1.65229
DNMT1	4.89435	6.95482	5.75143	3.84433	3.20327	4.17966	1.41169	2.75482
DNMT3A	3.43033	6.82333	5.22705	2.38754	3.03112	4.37371	1.63651	2.2623
DNTT	2.75516	2.22379	4.15562	1.1612	2.51774	2.34553	0.89592	1.7538
DPP4	4.09414	3.81783	3.19894	4.09638	2.43325	1.20575	1.41525	1.5646
DST	6.26645	6.1393	2.87508	4.97756	3.72051	2.21165	1.65848	1.61488
DUSP1	5.15421	3.63707	5.25444	5.40409	5.43555	1.53275	4.84401	1.05405
DUSP2	2.76527	5.46964	3.84787	1.18572	3.18555	3.02743	2.20711	2.39147
DUSP4	5.24972	4.47404	3.70063	3.71279	3.03369	2.33459	1.77406	1.94159
DUSP5	5.29779	4.63872	7.31083	4.01578	6.12183	3.50187	4.79385	3.31554
DUSP6	2.13084	4.92371	4.82792	3.33786	3.76608	3.56302	3.01069	1.83752
EFNA1	6.23371	5.17519	5.57256	1.95195	3.87581	1.81541	2.77646	1.98728
EFNA4	2.51015	5.3424	4.46061	1.93556	3.20272	3.60501	2.1056	2.5049
EFNA5	5.09684	4.72964	4.60934	1.83467	3.49271	2.25377	2.21917	1.72146
EFNB1	3.39784	4.39536	4.1729	1.48265	2.79619	4.31742	1.91908	1.85993
EFNB2	4.10688	6.12533	3.22813	4.00496	3.27719	3.04802	2.27831	2.22965
EFNB3	2.26431	4.22187	3.52774	1.64255	2.66116	2.74524	0.787802	1.86447
EGF	2.21754	2.33783	4.03212	0.926945	2.01355	2.71155	0.662163	1.93596
EGFR	3.89782	4.7687	4.37609	3.4053	3.23818	3.37067	1.01051	2.25695
EIF5A	5.02634	7.33473	5.15992	6.14546	4.76123	4.84005	3.58446	3.21434
ELANE	3.56085	2.37841	4.54251	1.10683	3.15271	2.79017	2.75454	2.10666
EMP3	4.28494	3.30862	4.91361	3.84216	4.17298	2.63645	3.26619	1.98993
ENG	2.64161	4.40789	4.61681	5.05139	3.97946	2.58117	2.7976	2.05563
ENTPD1	1.3539	3.46358	5.43666	4.44466	2.73466	4.24689	2.27643	1.31196
EOMES	2.19676	2.0136	3.77327	1.37647	1.81507	2.567	1.32265	0.972582
EPCAM	7.23236	6.57303	6.27283	3.2793	2.91145	3.60218	1.28376	2.6796
EPHA2	5.45708	5.0705	6.04834	3.34016	3.32601	3.75438	1.33919	2.35646
EPHA3	2.80861	2.77148	4.39892	2.34427	2.72797	2.9784	1.32961	2.3861
EPHA4	3.50468	5.84281	2.24628	2.10438	2.88921	1.9392	1.49946	1.61331
EPHA7	0.959708	5.14239	4.24276	1.33658	2.59438	2.25853	1.40736	1.81633
EPHB2	2.58029	4.30162	4.89892	2.94664	3.09627	3.17668	1.66982	2.29874
EPHB3	2.81263	5.59799	3.0543	3.41941	3.51435	3.31395	1.62214	2.60055
EPHB4	3.62046	6.73173	5.35018	4.0943	3.60175	3.90327	2.02706	2.72325
EPHB6	2.41989	3.38157	4.40069	1.6609	2.83326	2.92776	1.46742	2.08114
EPOR	6.66034	5.55632	5.90099	1.75975	3.8366	3.07133	3.04109	2.6498
ERBB2	4.79568	4.53457	4.47428	2.61882	3.59286	2.48879	1.83693	2.20659
ERBB3	5.59176	5.43505	4.14811	1.77852	3.42342	2.30486	1.84008	2.08557
ESAM	2.5361	2.90124	4.38867	3.18403	3.28272	2.366	2.15259	1.82423
ESR1	6.35798	6.06486	5.90772	2.86079	3.04168	3.45974	1.92531	1.96304
ETS1	3.76345	6.02016	3.19233	4.52174	3.71646	3.71645	1.73165	2.4959
ETV4	5.87188	4.54458	5.14448	2.31735	2.93401	3.96598	1.57025	2.00332
ETV5	6.12307	6.50732	4.35229	3.6131	2.68546	4.50737	2.64205	2.04415
EZH2	3.78752	6.88379	5.98104	1.38516	3.20514	4.4185	1.45475	2.63274
EZR	7.46813	6.21084	6.2858	1.6088	4.08186	3.14712	1.50341	2.6046
FABP4	2.83277	2.40261	3.84567	1.53909	2.33622	1.88769	1.42721	1.1973
FABP5	4.79678	6.0676	4.94527	3.49445	4.0443	3.55591	3.28346	2.8553
FAS	6.72626	4.09424	5.13289	4.58345	3.49053	3.75388	2.0032	2.23092
FASLG	2.74695	2.236	4.39848	1.66465	3.05382	1.19168	1.53372	2.072
FASN	5.17172	5.28123	4.44439	3.0937	3.47176	2.70603	2.27849	2.08433
FCER1G	2.73383	2.81199	4.41848	4.10933	3.10176	1.7888	2.9612	2.22124
FCGBP	3.26305	2.90645	4.33837	1.57884	2.94402	1.99586	1.8326	2.26242
FCGR3A	2.69557	1.96564	4.98265	4.52892	3.91888	2.29508	3.98066	1.94972
FCRLA	2.99921	2.62885	4.45411	1.57326	3.22414	1.65007	2.28988	2.08854
FES	3.55652	3.6644	4.80654	3.4345	3.86099	2.81709	3.14631	2.0281
FFAR2	3.34817	2.36665	4.76031	1.42752	3.37045	1.89984	3.01723	2.39252
FFAR3	3.10115	3.01315	4.7135	2.02289	3.24522	1.89117	2.05138	2.79454
FFAR4	2.86926	2.96821	4.45128	1.77464	3.05863	2.67626	2.14834	2.3606
FGF1	2.62254	2.61792	4.54246	1.46329	2.84307	3.66038	1.19828	2.09285
FGF12	3.24358	2.50248	4.39394	1.51156	3.11607	2.17158	1.41245	1.9892
FGF13	2.71596	2.83155	4.08314	1.15489	2.8715	2.67952	1.40194	2.00013
FGF18	5.71956	6.13758	4.5578	3.30921	3.17563	3.26696	0.697989	2.37486
FGF2	3.20133	2.95454	4.29871	1.92991	3.02973	2.85773	1.22408	1.90286
FGF7	2.44762	2.87674	4.34468	4.48983	3.71977	2.14259	1.69567	2.33987
FGF9	3.18858	6.13729	5.33974	2.5685	3.03218	2.75886	1.61966	2.16621
FGFR1	5.57954	7.24992	3.63907	5.70364	2.85797	4.41879	1.16626	2.50972
FGFR2	2.06544	5.83958	4.75436	1.92116	3.21181	2.83022	1.18767	1.86396
FGFR3	3.69991	2.72143	4.18953	1.29779	2.65123	2.63209	1.22347	1.86998
FGG	2.56439	2.36407	4.47612	1.30966	3.07825	2.65698	1.85409	2.00255
FGR	2.73859	1.73709	4.44539	1.81425	3.38747	1.06247	2.86295	2.70872
FKBP11	4.18034	5.30458	5.89596	3.90608	4.67114	3.84638	3.46852	3.6902
FLT1	4.10671	3.0351	4.55356	4.49962	2.84593	3.20684	1.81264	1.98015
FLT3LG	2.78677	2.41156	4.83418	4.08598	3.38178	3.21242	2.8174	2.04955
FN1	1.93813	3.47431	5.56056	4.48078	5.20702	7.79525	2.71701	2.05842
FOS	5.65412	3.21141	5.38084	1.30743	5.23302	0.914102	4.4425	0.787699
FOXF1	2.55849	2.49768	4.4985	4.42388	3.38579	4.26009	1.73603	2.20553
FOXP3	2.35296	2.36243	4.02213	1.1821	2.63792	2.14242	1.95095	1.54542
FPR1	3.38509	3.36702	4.71136	2.71351	3.77454	2.27707	3.44975	2.27038
FYB1	2.77291	2.01604	4.49636	2.4697	3.28032	1.87931	2.91643	1.53286
FYN	5.30853	4.92691	4.62786	4.97454	3.12391	3.40173	1.3596	1.98828
FZD1	3.46156	3.91887	4.17949	4.64733	3.19591	4.24696	1.60659	1.62687
FZD3	2.19075	4.89876	3.26253	1.26086	2.60025	2.77482	1.66091	1.64177
FZD4	5.52963	4.28821	4.45339	3.98733	3.60831	2.10899	1.79342	2.33046
FZD5	6.21855	6.82754	3.12078	1.72706	3.04674	3.52812	2.17655	2.41846
FZD6	4.75662	4.87451	4.99113	2.88254	2.76245	4.03984	1.24058	2.02148
FZD7	5.88123	4.0389	4.63187	2.90043	3.75054	3.26078	1.68445	2.73335
FZD8	5.12929	2.71442	4.29566	2.37034	3.17217	2.72193	1.86798	1.90075
G6PC2	2.68102	2.25034	4.27692	1.41294	2.95365	1.76642	1.37861	2.24302
G6PD	2.93433	4.55758	3.80106	3.38509	2.90033	2.65332	2.17224	1.64627
GADD45B	6.45798	4.86202	4.97891	1.51231	5.48583	1.23248	3.8882	3.23341
GAS6	3.32081	5.31856	4.4719	4.55014	4.06249	5.18946	2.58982	2.21435
GATA3	4.42955	3.2979	4.64614	2.48605	3.28373	2.4018	0.532711	2.81263
GC	2.96121	2.54172	4.39586	1.57887	2.83278	2.58145	0.908717	2.25431
GCG	2.23277	2.03187	4.22633	1.41438	2.8639	1.92656	1.27179	1.87339
GDF10	3.07603	3.08689	4.32122	2.0432	3.22602	1.53044	1.33683	2.34252
GDF15	6.53697	1.20448	5.11697	1.48923	3.29003	3.07286	2.35012	2.35472
GDF3	2.87553	2.64002	4.21758	1.49776	2.49594	2.5056	1.50653	1.57627
GDF6	2.94957	2.35328	4.69962	1.51162	2.96973	3.01358	1.20892	2.67734
GDF9	2.92294	2.83477	4.60754	2.94845	3.02161	1.78709	2.1972	1.81488
GDNF	2.32276	2.57485	4.46959	1.37722	2.79549	2.71988	1.45621	2.11758
GLUD1	4.31404	4.15475	3.72797	3.10442	2.8613	2.58676	1.42232	1.94604
GLUL	6.29259	6.26113	4.24695	6.15969	4.66409	1.75612	4.57155	2.72705
GNLY	3.24727	4.18667	5.38442	3.78244	3.84925	3.64216	3.12891	2.21636
GPBAR1	3.226	2.80901	4.74982	2.81274	3.27707	2.66239	2.67871	2.12719
GPER1	3.4453	2.59359	4.77209	3.10016	3.19713	1.99231	1.61438	2.65944
GPNMB	4.6197	1.84668	4.77369	5.32934	3.00529	0.823028	3.13525	1.76223
GPR183	2.67433	2.22334	4.36766	1.9263	3.16149	1.93068	2.04657	1.95686
GPX1	6.35994	7.40337	4.37721	6.28572	4.98989	4.41522	4.08061	3.25601
GPX3	2.08031	4.61076	4.00399	0.814741	4.76894	0.564825	3.12177	0.79838
GSN	3.93484	4.87104	4.87071	3.93931	4.20979	4.83899	2.83917	1.75719
GSTP1	5.11407	7.68987	5.75812	5.93548	4.4433	5.01954	3.13904	3.10235
GZMA	2.1622	2.09959	4.28531	2.57982	2.70176	1.93347	1.36532	1.70172
GZMB	2.1012	3.16577	4.73807	1.68831	2.57853	3.03056	1.33406	2.03489
GZMH	2.73385	3.07848	4.63917	2.35044	3.29155	1.83737	1.688	2.49125
GZMK	2.89579	2.46088	4.23686	1.34687	3.04257	2.91723	1.39537	1.85642
H2AZ1	3.13234	6.75017	3.71081	4.60936	3.83011	4.27169	3.01901	2.06291
H4C3	4.76314	7.64362	4.31424	5.1508	3.9049	4.69666	2.59823	2.80618
HAVCR2	2.85201	2.04031	4.22309	2.06474	2.80195	2.06676	1.73372	1.58481
HBA1	4.45626	3.37236	4.75509	1.43634	3.26079	2.63214	1.98496	2.54872
HBB	2.55124	2.74731	4.45648	1.47731	2.82983	2.91935	2.19679	2.17452
HCAR2	3.91486	3.18391	4.58101	1.49034	3.46416	1.77654	1.75362	4.07272
HCAR3	2.77524	3.13553	4.77771	2.0323	3.05024	2.82255	1.73535	3.18414
HCK	2.81939	1.93813	4.37148	3.82141	2.8491	2.46494	2.7157	2.18661
HCST	3.09373	3.83764	4.94874	2.08612	3.64464	2.23878	3.13478	2.01412
HDAC1	4.92704	5.71288	3.7412	4.24849	3.45783	3.46385	1.96404	1.89125
HDAC11	3.65319	4.80955	4.7125	2.58891	3.15881	3.20983	1.78249	2.12085
HDAC3	4.65366	5.73625	3.81978	4.67319	3.45757	3.34396	2.79832	1.97447
HDAC4	4.42566	5.72552	4.89471	2.749	3.47347	3.6362	2.1175	2.41482
HDAC5	4.47205	4.27042	4.4628	4.02798	3.15105	2.61169	2.08554	2.02836
HGF	2.99893	2.52943	4.4907	5.16942	3.45971	0.877182	2.20141	2.09752
HIF1A	5.02074	5.03108	4.06121	5.59773	3.59569	1.30754	2.53776	2.33256
HILPDA	7.74508	5.46967	2.5737	5.06717	3.83979	3.82914	2.18363	2.73894
HLA-A	6.28789	6.67382	8.60894	7.99116	5.73814	5.92243	4.97401	3.87172
HLA-B	5.67472	5.89936	8.60273	7.96148	5.69011	5.63485	5.22525	3.47818
HLA-C	5.09399	5.79174	8.3595	7.46137	5.75535	5.95634	5.26657	2.75911
HLA-DPA1	2.2856	1.78964	5.05814	3.45	4.29848	3.3292	3.7688	0.9315
HLA-DPB1	2.23902	1.94967	5.03521	3.12937	4.08283	0.756332	2.98867	1.59048
HLA-DQA1	2.83916	1.85609	5.25588	3.90802	4.52117	1.22556	3.69575	1.74657
HLA-DQB1	5.82427	2.35183	6.11869	3.59198	4.49465	1.14164	3.53925	1.94005
HLA-DRA	1.96764	1.54216	5.64075	4.4106	4.18931	1.94868	3.34871	1.54284
HLA-DRB1	1.57393	1.02282	6.11483	4.77123	4.9554	1.17791	4.39079	1.18959
HLA-DRB5	2.34067	1.27474	5.74038	4.28779	4.77111	1.24222	4.00027	0.768216
HLA-E	3.7707	5.13688	6.42179	6.07416	4.81953	2.7828	4.12832	2.07477
HMGB2	4.43441	6.97137	3.91302	4.35631	4.00306	4.11949	2.98105	2.26554
HMGN2	4.1061	4.12036	4.35205	1.41068	3.34788	3.40627	2.78316	1.49137
HPGDS	3.86917	2.43727	4.46585	2.65262	2.93278	2.91475	1.92268	2.0585
HSD17B2	3.46374	2.61322	4.20956	1.81191	3.0774	2.1698	1.34608	1.60804
HSD3B2	2.79672	2.33738	4.74219	1.23409	3.00269	2.48747	0.793351	2.66578
HSP90AA1	8.25685	7.60282	5.28968	6.00935	4.12555	4.464	2.03141	3.7235
HSP90AB1	8.30444	8.51482	5.70497	6.68876	4.62896	5.25376	2.47196	4.16225
HSP90B1	4.9583	7.39109	5.43972	5.99973	4.48723	4.90799	2.62173	2.52873
HSPA1A	8.43246	4.94374	5.74927	5.63436	4.61121	1.97308	2.55809	3.97754
HSPA1B	8.11779	4.62305	5.784	4.83794	4.3973	1.33822	2.72482	3.6167
HSPB1	8.63321	6.30627	5.23608	5.90323	4.68541	5.32091	1.96695	3.62089
HTT	4.82071	5.32813	2.93703	3.20833	3.10901	2.68486	1.08352	1.78746
IAPP	2.54344	2.42541	4.0066	1.35899	2.52039	2.47329	0.961187	1.80604
ICAM1	5.35814	1.69568	5.92267	5.11941	3.45706	1.31804	1.59812	3.04853
ICAM2	3.7499	4.36289	5.14823	1.29309	3.83076	2.76273	1.89196	2.47606
ICAM3	2.71192	5.24518	5.00606	2.34011	3.82427	2.34826	2.9268	2.71044
ICOS	2.95237	2.63248	4.50918	1.32961	2.95905	2.60888	1.85242	2.10022
ICOSLG	5.57633	2.33237	5.22978	3.46859	3.62771	1.83808	2.43841	2.16212
IDO1	6.95467	2.87967	6.58115	3.99164	3.12792	1.96344	2.2778	2.13628
IER3	6.9017	4.89096	5.98795	5.89095	4.14101	2.64452	2.86059	3.35513
IFI27	4.16601	5.89463	7.64586	6.39856	3.22864	2.77256	2.28243	3.01652
IFIH1	4.38424	1.31466	5.78219	4.94008	3.40653	1.47742	2.55884	2.48225
IFIT1	3.03623	2.31469	4.62704	1.6474	3.16897	2.66259	2.3773	1.78844
IFITM1	7.69997	6.66333	6.37624	6.82312	1.83902	5.02268	3.28724	2.74112
IFITM3	7.66102	6.6668	6.73918	7.21504	5.48701	5.13018	4.36939	3.43163
IFNA1	2.76686	2.36664	4.27502	1.86382	3.01048	2.11652	1.60012	1.88528
IFNAR1	3.67764	4.08919	3.78855	2.82902	2.88852	2.71492	2.02515	1.75323
IFNAR2	1.95035	5.04737	3.63555	4.35828	3.10739	2.66862	2.51679	1.2322
IFNB1	2.79196	2.1203	4.31404	1.63867	2.95416	1.92483	1.7075	1.76934
IFNG	2.48103	2.36301	3.97821	1.09518	2.70325	1.63265	1.04912	1.78137
IFNGR1	5.45168	4.00517	4.40487	4.56958	3.18952	3.62438	2.81851	1.5615
IFNGR2	3.08597	5.27968	4.03516	4.51904	3.51772	2.48345	2.51132	2.13188
IFNL2	4.63908	2.42502	4.58485	1.07371	2.9063	2.70722	1.30518	2.61946
IFNL3	2.84125	3.0307	4.77406	2.34211	2.82833	2.52864	1.76994	2.22771
IGF1	2.9124	2.69745	4.53253	0.990564	3.87903	2.04277	1.599	2.19196
IGF1R	5.28162	4.06326	4.24514	3.89243	3.58213	3.39883	2.08677	2.18751
IGF2	5.25828	2.96964	4.06634	5.60497	0.734698	0.713917	0.787063	2.16646
IGF2R	5.87284	5.88728	4.4529	4.53263	3.73478	3.53563	2.27207	2.6654
IGFBP3	8.0732	2.04193	5.37234	5.15213	2.50711	4.05461	0.994903	2.60516
IGFBP5	9.11601	4.6286	4.20327	6.42547	1.89086	6.36806	1.48405	3.03559
IGFBP6	3.53002	2.39326	4.90336	1.99587	3.59294	3.78587	2.41206	2.39315
IGFBP7	2.32577	4.91384	5.69044	6.63067	6.77171	5.67868	3.75387	2.18054
IGHA1	2.30507	3.9045	5.88496	1.65293	5.1232	4.68294	3.97967	3.05421
IGHD	3.83358	2.86269	5.16687	1.14621	2.97823	3.95726	0.603103	3.13174
IGHG1	2.77244	5.08141	6.20758	2.83485	3.74581	6.2846	3.65076	4.1184
IGHG2	2.38625	4.27284	5.90431	1.92342	3.75727	5.6045	3.28042	3.57622
IGHM	3.05094	2.81803	5.03326	1.0462	3.51135	3.56092	2.0629	2.74762
IGKC	2.11115	4.90972	6.11241	2.99014	4.24743	6.20446	4.24224	2.44465
IL10	4.37367	2.70181	4.71769	2.17883	3.38679	1.93823	2.24573	2.06965
IL10RA	2.31276	1.82648	4.22538	2.06819	3.39102	1.58469	3.00138	0.825792
IL10RB	3.08237	4.23385	4.69397	4.01153	3.63908	3.06936	2.91566	1.9386
IL11	3.15708	4.7172	5.45336	5.12633	3.61879	3.13602	2.12969	2.83956
IL11RA	1.9193	4.61085	3.97004	3.61178	3.6873	2.26206	2.24518	1.73957
IL12A	3.96064	2.54341	4.81181	2.26824	3.04654	2.69791	1.72825	2.37512
IL12B	3.08895	2.64193	4.7209	1.46952	3.45587	2.42894	2.08612	2.38989
IL12RB1	3.00074	2.42589	4.54097	1.70418	2.92779	2.71118	2.49731	1.76669
IL12RB2	4.77512	2.26233	4.83532	1.93061	3.24217	2.13868	1.44289	2.08446
IL13RA1	2.21017	5.27534	3.92538	4.14478	3.74649	3.7975	2.92957	1.85461
IL15	2.94114	2.88066	4.46607	2.41035	3.09337	2.19621	1.9355	2.08766
IL15RA	4.56916	1.95538	6.06243	4.63822	4.06724	4.55464	2.38433	3.01048
IL16	3.82142	2.53211	4.99791	1.6647	3.94794	4.8833	3.06658	1.85552
IL17A	3.14536	2.50119	4.39232	1.27064	2.92871	3.26834	1.4578	2.2057
IL17B	3.10822	3.47105	4.72214	1.40713	3.50464	2.83298	2.30684	2.39292
IL17D	4.27707	3.94425	4.8635	1.2437	3.37582	3.71513	2.12657	2.57876
IL17RA	3.42142	3.90013	4.58814	3.68285	3.45117	3.19704	3.20896	1.72402
IL17RB	1.8475	4.63223	4.4841	2.00181	3.46154	2.4461	2.08983	2.2539
IL17RE	3.6665	4.37457	4.56277	1.84252	3.17775	2.63272	2.12075	1.72224
IL18	2.33534	1.88421	4.40317	2.09548	3.04805	2.54633	2.59669	1.40784
IL18R1	3.00096	2.51039	4.29085	3.04337	3.15756	1.29968	2.182	1.80319
IL1A	3.80344	2.89445	4.7331	2.49353	3.17062	2.54739	2.36832	2.48594
IL1B	3.70616	1.70984	4.59603	3.5206	2.69007	1.25911	0.822694	3.80521
IL1R1	5.28066	2.25754	5.36673	6.62855	5.37955	5.40289	3.09522	2.35993
IL1R2	3.63997	2.24117	4.36884	1.84289	3.12469	1.64151	3.69959	2.11396
IL1RAP	4.2558	2.96174	4.82393	4.06989	3.69947	3.0637	3.44316	2.2937
IL1RL1	2.30596	2.29537	4.07039	1.31532	2.76256	1.41785	2.09551	1.29963
IL1RN	5.14599	1.34686	5.18977	3.40046	3.47217	1.20872	1.18663	4.38359
IL2	3.31224	2.2722	4.1446	2.06638	2.52662	2.43899	1.42309	1.69078
IL20	2.97767	2.68806	4.38075	1.87188	2.90359	2.58012	1.35208	2.03738
IL20RA	2.36922	3.42566	4.41052	1.28296	2.82568	3.02352	1.19479	2.12209
IL22RA1	2.03625	2.14862	4.10518	1.24422	2.85401	1.50329	0.838653	1.83775
IL23A	2.99387	3.72058	4.70635	1.32668	2.84462	2.96989	1.07616	2.48765
IL24	3.13617	2.35936	4.52474	5.35085	2.51266	0.522647	1.94762	2.04365
IL27RA	4.99777	4.3087	5.31165	2.39444	3.52043	1.97146	1.54742	3.01303
IL2RA	3.15653	2.41907	4.73245	2.89534	3.58468	2.1778	1.90782	2.68522
IL2RB	2.32067	3.25699	4.02166	2.06071	3.1329	2.18092	1.06511	1.94349
IL2RG	3.999	2.28608	4.72002	2.30497	3.57935	2.01711	2.98475	1.89956
IL32	6.87132	1.29082	6.7697	6.74237	4.72728	4.35455	3.61592	2.76114
IL33	4.25188	3.77388	4.45232	1.457	3.1172	2.51497	1.7596	1.49753
IL34	3.29291	2.78536	4.46524	3.71567	3.28908	1.45668	2.02733	2.04158
IL36G	3.12476	2.36552	4.12408	1.30834	2.81294	1.3179	1.18731	1.72897
IL3RA	4.66303	1.58993	4.78212	1.84262	2.84618	2.21578	2.2506	1.68401
IL4R	5.36756	2.42555	5.31333	4.81299	3.77535	3.59887	2.69733	2.46431
IL6	3.66327	3.2885	4.7155	3.22706	3.77418	1.4759	2.10761	2.30284
IL6R	4.73303	2.64658	4.56929	1.44017	3.44421	1.87052	2.33057	2.74279
IL6ST	4.91648	4.34439	4.83717	4.39682	4.08259	2.81623	2.16339	1.80667
IL7	3.10289	2.20524	4.28759	1.54268	2.67855	3.00168	1.31782	1.68555
IL7R	2.09395	2.00753	4.43262	4.90501	2.98854	4.37752	2.60333	1.13499
INHA	3.31939	3.67585	4.73974	2.00578	3.09473	2.8458	1.63154	2.4031
INHBA	2.52747	2.69888	4.22661	1.84913	1.92353	5.37717	1.27865	2.14045
INHBB	3.79383	2.77678	4.5145	1.67475	2.99109	2.56578	2.28976	1.96594
INS	2.56641	3.41294	4.28505	1.69613	2.85221	2.67264	1.0918	2.03861
INSR	2.92933	2.69469	4.31092	4.12719	3.88015	2.96405	2.21371	1.63426
IRF3	3.44769	5.91506	4.85655	5.01973	3.89596	3.78355	2.98673	2.10329
IRF4	3.32007	2.56353	4.4214	1.50647	2.67792	2.90016	1.79499	1.9086
ITGA1	2.3042	4.77927	3.9739	5.36419	4.8098	4.00103	2.12916	2.03662
ITGA2	4.61943	4.28579	4.54127	1.29978	3.49367	3.77526	1.78701	2.02322
ITGA3	5.70239	4.3331	4.98277	2.9021	3.4178	2.036	2.04047	1.40222
ITGA5	7.12522	5.65018	4.49054	5.59647	3.52219	3.91034	2.62717	2.89992
ITGA6	2.3223	5.06815	3.58922	2.08021	3.26485	2.13851	2.0026	1.97486
ITGA9	1.55742	5.21969	3.87743	1.12273	3.85666	2.44609	1.46111	2.05062
ITGAE	2.97771	2.58764	4.39405	1.1201	3.1255	2.27053	2.44463	1.69163
ITGAL	2.32023	2.3141	4.20567	1.71415	3.04217	1.09048	1.39214	2.10982
ITGAM	3.21776	2.24261	4.4951	0.956479	3.06512	2.80313	2.47198	2.14629
ITGAV	6.6387	4.90621	6.27747	4.36227	3.63808	5.02741	2.13079	2.25561
ITGAX	3.29681	2.05654	4.7741	1.85825	3.67871	1.35361	3.75145	3.40431
ITGB1	5.62565	6.42879	3.83769	5.31832	4.59944	5.22087	2.44386	1.85528
ITGB2	2.54834	1.9698	4.93141	3.92816	4.02789	1.54243	3.62856	1.10438
ITGB4	5.51698	4.07698	4.71665	1.89127	3.28017	2.65129	2.07497	1.88443
ITGB5	2.87769	5.56743	2.38571	3.96894	3.70725	5.35915	1.50029	2.15329
ITGB6	2.83764	2.49753	5.46655	1.23062	3.43332	1.28432	2.24553	1.68355
ITGB8	7.55879	2.34216	6.1578	2.7006	3.30819	3.19914	2.05648	2.48354
ITK	2.51063	2.68397	4.1777	1.37214	2.99079	2.13357	1.94898	1.69589
ITM2A	2.2922	2.56769	4.24589	1.73341	2.88084	2.74414	1.06293	2.01401
JAG1	7.02313	6.56416	5.77377	4.80593	4.15628	3.21995	2.21967	2.56467
JAK1	4.85685	4.80852	4.87944	4.70729	3.44714	3.86908	2.38587	1.94767
JAK2	3.53023	2.86143	4.67114	4.74265	3.36413	3.17685	2.1313	1.83037
JCHAIN	2.42954	2.04557	4.58177	1.1786	3.75288	3.82455	1.68529	2.01546
JUN	7.98316	5.98362	5.00967	4.80346	4.8283	1.78812	3.27049	2.6512
JUNB	6.83233	6.04925	6.96188	5.34024	4.88541	4.59949	3.52197	2.83097
KDR	4.40183	2.13986	4.8215	2.3707	3.49212	1.75943	1.71098	2.22589
KIT	4.79708	3.79409	4.38889	1.19921	3.04944	2.91451	1.55727	2.5985
KITLG	3.01316	3.13021	4.36569	3.47988	3.35369	2.17724	1.81448	1.99795
KLF2	4.16284	4.25065	5.22564	0.205644	4.55373	1.26721	3.85704	2.45561
KLK3	2.98037	2.50738	4.72517	1.64708	3.12706	2.64013	1.0197	2.41254
KLRB1	2.72437	2.12492	4.23346	1.20976	2.78992	2.45452	1.61587	1.43663
KLRK1	3.0884	2.58793	4.44336	2.36755	3.25913	2.18965	2.33575	1.6454
KRAS	5.607	6.06909	3.11281	4.0525	2.89259	3.42768	1.93083	2.38307
KRT1	3.9524	4.84247	5.051	3.47501	3.56652	3.46916	2.24846	1.97687
KRT10	4.57307	2.89003	4.28937	1.43215	3.12072	1.15544	1.93806	1.64592
KRT13	3.62827	2.10387	4.60124	1.48205	3.00445	2.59593	2.33186	2.09727
KRT14	4.08541	5.45507	6.41194	4.30431	4.68574	4.08951	3.10975	2.70354
KRT15	5.20771	5.36038	6.06149	4.99836	4.19158	4.16127	2.94742	2.07959
KRT16	5.01756	1.93056	5.52348	1.59122	4.17737	3.77955	2.86969	3.47261
KRT17	7.08623	1.9961	5.60917	1.57103	3.17234	3.2776	2.04426	2.6754
KRT18	7.19053	5.94083	5.62739	3.6376	4.02176	3.20351	2.52616	3.73285
KRT19	7.98881	4.04819	6.37864	2.40308	3.85127	1.81389	2.66195	2.90017
KRT20	2.95833	2.08414	4.15598	0.966883	2.3401	2.64654	0.603302	1.82584
KRT23	4.41626	1.58108	5.11076	1.7889	3.01274	2.26146	1.65582	2.12375
KRT24	3.40969	2.625	4.37147	1.77648	3.03499	2.29275	1.83503	1.64292
KRT4	3.11524	3.19422	4.35903	2.42042	2.9505	2.85338	1.62907	2.02187
KRT5	6.8369	4.64083	4.01284	3.33014	2.65855	2.30595	0.779973	2.19998
KRT6A	6.08223	3.7787	4.87968	2.55097	3.12266	3.24858	1.72443	2.55011
KRT6B	4.04105	2.76814	4.24722	1.16425	2.94478	2.42417	1.67724	1.8185
KRT6C	4.55126	2.54064	4.77028	1.37856	3.47559	1.4888	1.65274	2.51308
KRT7	7.33357	4.21508	6.40723	1.61351	4.17958	4.02723	2.92055	2.36705
KRT8	7.5979	6.59804	6.32136	3.67683	4.50077	3.26626	3.32093	3.8711
KRT80	2.89102	2.64413	4.16223	2.13517	2.32658	2.6843	0.929693	1.63097
KRT86	3.751	2.79564	4.45417	1.4317	2.25715	3.36082	1.2709	2.04955
LAG3	1.64553	4.31923	4.43516	1.61914	3.27775	2.23653	2.53909	1.41687
LAIR1	2.61071	1.9981	4.66594	1.61034	3.32701	3.19608	2.96671	1.78316
LAMP2	4.64391	4.62014	3.76399	4.13519	3.12253	2.73396	2.22948	1.51496
LAMP3	3.40069	1.23948	4.89943	1.13476	3.19528	2.36129	1.90269	1.95179
LCN2	4.62984	1.27603	4.62617	1.5671	2.79146	1.22684	2.13928	1.38117
LDLR	3.99929	6.08937	6.44207	4.77948	3.35818	3.23068	1.57367	3.19085
LEFTY1	2.77835	4.49844	3.75959	1.53365	3.1051	2.14937	1.77751	2.50611
LEFTY2	1.92563	3.61338	4.10959	2.30508	3.09035	1.75985	1.68849	1.91392
LEP	3.0728	2.39558	4.32356	1.37766	3.00782	1.94177	2.34547	2.07148
LGALS1	7.00917	6.81896	6.60596	6.77792	2.99095	7.18052	3.63318	2.92679
LGALS3	6.82358	2.61874	4.97454	4.96447	3.8686	3.0722	2.17112	2.96586
LGALS3BP	2.6621	6.33941	6.00232	5.7058	3.2702	4.52273	2.3621	1.63901
LGALS9	2.78204	4.53436	5.79786	4.7438	3.11259	3.83352	2.60548	1.99035
LIF	6.15351	1.56838	5.58346	1.02955	3.47169	3.39325	2.44619	1.7702
LIFR	2.82327	3.83002	3.97345	2.32527	3.15116	1.86929	1.28767	1.52924
LINC02446	3.30127	2.30865	4.21434	1.96638	2.76039	2.25293	1.41272	1.54439
LMNA	5.90938	5.09235	4.59409	5.45048	3.65491	3.36305	1.66784	1.54989
LPAR5	2.38521	2.708	4.20904	1.58154	2.83861	2.35498	1.93126	1.86726
LTB	6.2893	1.49787	6.04112	1.98071	3.90385	2.29415	2.76657	2.15322
LTBR	4.88323	5.61893	4.59132	4.49523	3.2814	4.13851	2.74332	1.2663
LTF	2.71071	2.4436	4.35135	0.962487	3.50892	0.789374	2.59969	1.21863
LUM	2.14686	2.1465	4.24535	5.95786	4.44983	5.5184	1.86861	1.12526
LY6D	2.40228	3.13698	4.42013	1.43228	2.41288	2.88188	0.711325	2.08241
LY75	2.41238	2.42014	3.78822	1.13083	2.69341	1.50065	1.49465	1.55682
LYN	5.14168	2.22623	4.5271	2.73518	2.85445	3.02585	2.12105	2.00541
LYZ	2.40856	1.48325	4.99686	3.7123	4.72091	1.03236	3.82108	0.872797
MAF	7.07734	2.63894	4.34617	5.46652	4.22885	2.52774	2.9626	0.957658
MALAT1	7.96177	8.75532	5.92983	8.22845	6.80867	6.99978	5.10087	3.65455
MAML2	6.30973	5.79257	3.64375	3.24945	2.96371	3.4601	1.23202	2.53934
MAP1LC3B	4.03598	4.11104	4.39143	3.48728	3.45061	3.34604	2.01306	2.11064
MAPK13	4.02763	3.26561	4.55849	3.59113	3.24942	2.58264	2.58291	1.85128
MAPK14	5.00398	5.43161	4.58387	4.08885	3.44625	4.11496	2.69101	1.66829
MARCO	2.90363	2.75443	4.0702	2.20994	2.8892	1.74234	1.71921	1.9421
MECOM	2.84792	6.87292	3.27462	3.04958	3.1148	3.38073	1.4543	2.34888
MEG3	2.00411	3.02426	4.67774	5.14254	3.18778	6.20479	1.83831	2.27924
MERTK	2.0546	5.30688	2.76863	2.56156	3.13637	2.12861	2.22428	1.49931
MET	5.25536	2.8256	4.57628	2.0629	2.53668	1.78539	1.15499	1.74829
MGP	4.52252	3.55997	4.09317	1.06565	5.16036	0.79108	2.7481	1.06842
MIF	8.39927	8.40134	5.70295	6.67736	4.36547	5.438	1.93237	4.45595
MKI67	2.14314	5.38492	2.69618	1.47977	2.64414	3.08239	0.960609	1.60143
MMP1	2.94589	3.36348	4.2239	7.41505	1.31849	1.68159	0.896772	2.21028
MMP10	3.47698	2.75541	4.10589	1.74561	2.58997	2.13184	1.53125	1.54224
MMP12	3.98055	1.60123	4.50096	4.67933	1.97973	0.618404	1.17043	2.3739
MMP14	1.84965	5.17211	4.83821	5.80409	1.88948	5.53177	2.24081	1.84945
MMP16	2.94561	3.12593	4.05412	2.36863	2.86458	2.62183	1.76444	1.63194
MMP19	3.5672	2.73396	4.41843	5.29526	3.21067	3.56216	1.96552	2.25375
MMP2	1.9298	5.9992	3.09983	7.03472	4.62341	5.66475	2.30203	1.65637
MMP3	2.7066	1.95937	4.05405	5.1694	0.922317	0.64498	1.41726	1.15932
MMP7	3.01538	1.64027	6.27817	1.92352	3.67387	3.3347	1.94908	1.57911
MMP8	3.44355	2.11647	3.95206	1.47588	2.39233	2.54788	1.07304	1.40365
MMP9	3.55964	1.88858	4.76547	5.24835	2.49236	0.76387	2.43613	2.23744
MPO	3.64864	2.67325	4.60488	2.01199	2.90028	3.01199	2.37664	1.86579
MRC1	3.53371	2.0138	3.96155	2.07465	2.93712	1.05992	1.47075	1.37271
MRC2	2.09929	3.82833	4.80045	5.30135	4.56785	4.57326	1.88163	2.37464
MS4A1	2.71862	2.40649	3.9155	1.48987	2.67347	2.06435	1.37255	1.43373
MS4A4A	1.94775	1.58299	3.97072	1.18935	2.53221	2.29612	1.78465	1.47942
MSMB	2.76629	2.22186	4.26093	1.27361	2.85626	1.88385	1.74555	1.59308
MST1R	3.28052	2.98161	4.53666	1.99115	2.85424	1.99033	1.17227	1.74892
MT1X	6.64091	4.05567	5.38514	5.00715	4.91599	5.32442	2.69906	2.8104
MT2A	7.0784	5.17842	5.82617	7.58078	6.2895	5.56715	3.53593	3.29288
MTOR	2.12573	5.31269	4.47014	3.01909	2.93253	3.50793	1.51082	1.74751
MTRNR2L1	3.69237	3.60043	4.26565	1.96507	2.44964	2.74753	1.01726	1.48156
MX1	2.45608	1.33243	6.4766	6.72551	1.70063	2.54595	3.07347	2.84453
MXRA8	3.21983	3.01825	4.4961	4.59232	3.89674	5.42817	1.24611	2.00779
MYC	6.87725	5.02248	4.31609	4.21006	3.34069	2.60704	1.06472	2.43353
MYH11	2.44348	1.98456	3.9101	0.898516	2.47583	2.56417	1.19502	1.13066
MYL9	2.51559	2.4113	4.41513	2.65289	3.40707	4.94698	1.68417	2.02114
MZB1	3.07646	3.40667	3.76927	1.33075	3.15898	1.40282	1.64303	1.55153
MZT2A	8.20682	8.85001	8.2684	7.08137	7.60524	5.97554	6.05772	7.21298
NANOG	3.68988	3.52823	4.56497	1.6615	2.93631	3.00982	2.115	2.17759
NCR1	2.61221	2.05244	3.99533	1.3018	2.41125	2.26734	1.1259	1.789
NDRG1	9.31356	2.08715	2.17536	5.9896	3.55654	1.34063	0.652868	3.71406
NEAT1	8.71688	6.69663	7.22521	7.29422	6.40164	5.96846	5.2177	3.30826
NFKB1	4.52778	3.39706	4.77086	3.8113	3.18707	2.36631	1.423	1.88041
NFKBIA	7.93265	2.61783	6.57713	6.26303	4.43353	1.34972	3.40321	3.3645
NGFR	3.40495	2.84931	4.32262	1.88935	2.82317	2.37218	1.15686	2.23314
NKG7	2.67589	2.16104	4.19973	2.4792	3.05984	1.71479	2.25634	1.50812
NLRC4	3.19339	2.77545	3.96722	1.17735	2.78378	2.84018	1.25926	1.95217
NLRC5	1.44871	2.69526	5.71047	4.27973	3.44069	4.11384	2.80598	1.60536
NLRP1	2.14381	3.88692	4.85541	3.08702	2.67552	3.37257	2.04692	1.26315
NLRP2	5.90085	4.35897	5.47205	1.53286	2.84948	2.28533	1.14601	2.16425
NLRP3	3.62945	2.56162	4.27781	2.49944	3.07829	1.63796	2.29574	1.89215
NOD2	3.1895	2.1914	4.73828	2.19209	3.10014	2.43951	2.80949	2.26512
NOSIP	2.83141	5.71153	5.43684	4.54707	3.69936	3.41138	2.49804	2.27595
NOTCH1	5.19554	5.85172	2.91861	4.128	3.75002	3.14869	2.64553	2.20086
NOTCH2	5.23255	4.94341	4.2457	3.53263	3.11976	3.88089	1.34535	2.05306
NOTCH3	4.54162	6.74609	4.00099	4.91157	4.10455	3.61007	1.44103	2.63942
NPPB	2.97032	2.87957	4.37552	1.30212	3.14396	1.6417	1.13898	1.84616
NPPC	5.21555	3.52302	7.05663	3.02985	5.67381	5.35266	4.37159	4.52557
NPR1	3.64878	2.22347	4.41658	1.56175	2.99167	1.77755	1.93837	1.93226
NPR2	2.89694	3.77552	3.88252	1.61126	2.90779	3.25094	1.08198	1.95976
NPR3	4.79531	3.1312	4.10407	2.3443	3.0652	2.41549	1.59625	1.63234
NR1H2	5.14731	5.19884	4.93564	3.90368	3.52857	4.16979	2.8821	2.2732
NR1H3	2.1753	4.14123	4.57734	3.09232	3.42204	3.19105	2.63053	1.56441
NR1H4	2.85718	2.38753	3.98877	1.23946	2.3766	2.6047	1.06851	1.41877
NR3C1	2.50747	1.78071	4.3679	4.48759	3.36698	2.36732	1.74261	1.94631
NRG1	2.77486	2.17701	4.14347	2.4576	2.36161	2.53037	1.03783	1.66583
NRG4	2.3751	3.37702	4.4182	1.55207	2.72758	2.82867	1.63592	2.00761
NRIP3	2.58231	3.06374	4.36677	2.52008	3.04046	2.12502	1.15494	2.02937
NRXN1	2.76733	2.34415	4.34269	1.39493	2.82087	2.28029	1.38824	2.1983
NRXN3	1.64867	5.44344	3.92966	1.7588	3.39778	2.22071	1.48225	2.05225
NTRK2	2.79879	2.12612	4.08411	1.47954	2.57957	1.45251	1.07134	1.57877
OAS1	3.86791	1.37983	4.63906	4.86968	2.373	1.1894	1.6889	1.82471
OAS2	2.64074	1.43421	5.49712	5.50533	3.17756	0.96926	2.45827	1.94128
OAS3	2.15629	1.46342	6.1458	5.91032	3.34989	1.87916	2.46516	2.77715
OASL	2.65362	1.65254	5.08473	4.48003	2.79603	1.0441	2.54903	1.81851
OLFM4	2.99443	3.94787	4.2153	1.92645	3.11971	2.03081	1.89505	1.98009
OLR1	1.95043	1.8736	3.89756	1.32612	2.6459	2.01649	1.79301	1.69302
OSM	3.04703	2.70244	4.2274	2.04826	3.11861	1.55599	2.76552	2.01747
OSMR	4.98602	4.472	4.18774	4.46096	2.55856	4.35581	1.3611	1.84361
OXER1	2.68854	3.01752	4.27927	2.30423	3.0775	2.0313	1.96478	2.1641
OXGR1	3.3499	3.84587	4.4082	1.91416	3.06459	1.95442	1.68431	1.74344
P2RX5	3.74849	2.60301	4.0284	2.5842	2.67591	1.40783	1.83423	1.4388
P2RY12	2.60768	2.49999	3.89006	1.3786	2.50554	2.15329	2.25589	1.24801
PARP1	3.36823	5.94563	2.93158	3.88937	3.13324	3.3887	1.56729	1.81552
PCNA	1.85381	5.54704	3.09287	2.96317	3.33863	3.16893	2.63539	1.80032
PDCD1	3.13642	2.90033	4.39795	2.09009	3.14378	1.43799	1.64589	1.77493
PDCD1LG2	2.58865	2.52869	4.17366	3.31052	2.79611	2.34257	1.94738	1.31323
PDGFA	7.20227	1.4272	4.86579	3.98809	3.79816	1.32437	1.83087	2.50882
PDGFB	2.83687	4.70471	5.45887	3.48782	2.69676	1.67056	1.77287	1.42389
PDGFC	1.57888	5.18755	4.42041	1.44432	2.53692	4.24639	1.38327	1.80952
PDGFD	3.14256	3.37812	3.70159	1.15753	2.6001	2.73516	1.19175	1.37045
PDGFRA	2.26135	2.68012	4.17134	6.33358	3.88201	4.21056	1.0639	1.95263
PDGFRB	2.37045	2.25272	4.45579	6.25934	4.38225	4.84126	1.36424	1.7214
PECAM1	1.657	4.5403	3.91806	2.11639	3.64264	2.65886	2.6855	1.20378
PF4	3.76154	2.58764	4.56915	1.70738	3.18869	1.75619	2.05169	2.48274
PGF	4.11945	3.71646	4.06856	4.16714	3.17295	0.940092	1.25005	1.65721
PGR	2.1609	2.0512	3.81608	1.27428	2.82848	2.22822	1.32221	0.865927
PHLDA2	5.47949	3.23442	4.55784	4.06116	3.18536	1.24721	1.75396	1.99152
PIGR	5.68767	2.2475	5.35507	2.2887	3.29375	1.61048	1.86107	1.83852
PLA2R1	2.8345	2.25084	4.46906	2.83365	2.67935	3.12218	1.36786	1.6498
PLAC8	2.48402	2.72891	4.44911	1.09839	2.90806	2.84849	2.44303	2.1735
PNOC	3.15211	2.48449	4.51289	1.37414	3.71968	1.59675	2.55783	1.63393
POU5F1	7.229	4.56107	4.96167	2.48707	3.61251	2.38949	1.33056	3.41389
PPARA	4.28282	3.63587	4.16075	2.9757	2.74644	2.68066	1.31301	1.85107
PPARD	2.02005	4.20085	4.17681	3.90831	3.16547	2.98411	2.0147	2.02739
PPARG	3.07452	4.30341	4.1486	2.73839	2.82299	2.33223	1.70919	1.86625
PPBP	2.65466	2.5086	4.11593	1.78103	2.09182	2.72323	1.56341	2.08696
PRF1	2.54493	2.39336	4.21339	2.43295	3.0577	1.41063	1.48107	1.35633
PROK2	2.45388	2.2481	4.15307	1.7743	2.69277	1.20501	1.87902	1.86299
PROKR1	2.67155	2.52582	4.0103	1.41588	2.40521	1.99334	1.15981	1.91327
PRSS2	3.79313	3.77016	4.75832	1.89092	3.3398	1.91893	1.05871	2.46594
PSAP	4.11368	6.62331	5.20828	6.27608	5.26995	4.11403	4.73694	1.17096
PSCA	2.93577	3.27505	4.3536	1.42369	2.68235	2.42131	1.17914	2.03294
PTGDR2	3.97777	3.88795	4.70354	2.34687	3.10436	3.08985	1.04441	2.24535
PTGDS	2.70598	2.72492	4.36363	4.36226	5.02584	3.05741	2.45948	1.23155
PTGES	5.0467	1.88255	4.67427	4.52092	2.82226	1.16766	2.09376	1.97994
PTGES2	5.29125	5.55111	5.35459	3.62937	3.68378	4.02653	2.57887	2.07782
PTGES3	5.68122	7.15663	3.86133	5.13742	3.13688	4.15048	1.42027	3.11599
PTGIS	2.58211	3.95995	4.47496	1.20075	3.6638	3.76838	1.58116	1.90901
PTGS1	7.22204	3.64994	4.71847	3.71984	2.96266	1.68962	1.31412	2.12584
PTGS2	6.86352	1.83652	5.43545	2.80969	2.89554	2.60044	1.80207	2.29428
PTHLH	4.23676	1.83053	4.36683	2.33674	2.33657	2.71535	1.26071	2.03488
PTK2	5.47854	5.08305	2.71348	2.75043	2.44157	3.34722	1.26807	2.06457
PTK6	2.96982	3.99963	4.84925	1.94879	3.13677	2.652	1.8967	1.89894
PTPRC	2.57249	1.95637	4.5708	1.46551	3.57783	2.69604	3.34858	1.63257
PTPRCAP	2.3621	3.39556	4.3536	2.8356	3.31081	2.24458	2.39832	1.45423
PTTG1	3.74292	5.60964	4.37429	2.42632	3.0637	2.95207	2.47329	1.70833
QRFPR	3.19838	2.89142	4.09356	1.68995	3.10187	1.604	1.50341	1.9213
RAC1	6.34608	6.75938	5.7197	5.46381	3.31838	5.40877	3.22023	2.92193
RAC2	2.58637	3.33257	4.16426	2.22721	2.86138	3.48605	2.96491	1.20432
RAD51	2.122	3.51604	3.62387	1.6201	2.59514	1.30498	0.776966	1.42669
RAMP1	4.3499	3.71736	4.61799	2.40086	3.40935	3.65875	1.7037	2.33477
RAMP2	2.15696	4.01644	3.87077	2.1837	3.12652	2.61524	1.97859	1.64776
RAMP3	2.94338	2.35296	4.18167	1.51146	2.87923	1.48377	1.7156	1.32032
RARA	6.05443	5.64382	4.92597	3.83196	4.61317	3.53983	3.46386	2.72133
RARB	2.54916	3.00591	4.70244	2.319	3.32771	3.60928	1.19542	2.00478
RARG	2.6438	4.85578	4.18804	3.62889	3.31445	2.44351	1.98024	2.01259
RARRES1	3.00107	1.64022	4.85261	1.77283	4.4706	2.73596	2.23584	2.11614
RARRES2	2.3751	3.78118	4.86108	6.31042	4.13987	6.48191	2.58298	2.54994
RB1	4.18378	5.05287	4.36579	3.98555	3.25937	3.20503	2.36146	1.91164
RBPJ	6.27987	5.35744	5.1733	2.84271	2.98406	4.70711	2.38621	2.11227
REG1A	2.77432	3.01116	4.50734	1.53302	2.81811	2.66975	1.38001	2.33649
RELA	6.03793	5.27964	4.5109	4.56701	3.12255	3.49359	2.44182	2.18035
RELT	4.03615	4.30566	5.05349	2.87127	3.3739	2.95577	3.03449	2.19631
RGCC	3.39629	2.62942	4.83735	2.06371	5.27165	4.68494	3.33583	1.17627
RGS1	2.61698	2.2304	4.85364	3.13196	3.87077	2.60674	2.93236	1.72728
RGS2	4.38456	3.64782	4.76509	5.10785	4.30341	1.33952	3.54803	1.67729
RGS5	2.63097	2.93055	4.08996	4.11985	3.60058	1.22891	2.11454	1.57972
RNF43	1.81566	4.75508	3.90563	1.38886	2.58805	2.61905	1.44538	1.60243
ROR1	3.2562	2.68668	4.21524	1.50342	3.15845	2.57889	1.50132	1.85519
RORA	3.8906	2.27979	3.92077	4.73962	2.28313	3.74341	1.36145	1.48261
RPL21	6.98555	7.69894	4.92721	5.58453	5.19656	5.61689	3.7661	4.17131
RPL22	6.49657	8.09345	5.66369	5.83578	5.25948	5.32357	3.12485	3.68978
RPL32	6.55011	6.49026	2.8728	4.16985	3.82561	4.24395	1.96189	2.79792
RPL34	6.73321	6.986	3.76864	5.53297	4.97321	4.03462	3.04747	3.1245
RPL37	7.25411	7.83451	5.5285	5.88305	5.36971	5.04313	3.18697	3.82538
RPS4Y1	2.71775	2.68315	4.0109	2.37092	2.0806	2.59966	0.875452	1.25649
RSPO1	2.76841	2.17166	4.22497	1.14256	2.40657	2.87203	1.65935	1.50889
RSPO2	2.36498	2.0998	3.62875	1.18064	2.07991	1.89868	1.2436	1.18301
RSPO3	0.93485	4.58768	5.05299	2.75326	2.39979	3.02441	0.667404	1.68485
RUNX3	5.66747	4.38655	4.75043	3.08788	3.76046	1.31523	2.55377	1.87053
RXRA	4.96301	4.40093	3.92057	3.41596	3.38695	2.6634	2.21201	2.06244
RXRB	5.46065	5.80997	3.80347	4.50763	3.35708	3.48819	2.00567	2.26875
RYK	5.09861	5.36453	3.63215	3.62551	2.71895	3.73662	1.45431	1.88439
S100A10	7.06422	4.42331	4.82672	3.69361	3.41849	3.74332	2.19065	2.22785
S100A2	5.8474	1.58181	4.63946	1.79186	3.10655	1.18521	2.14291	1.8637
S100A4	7.25938	6.53962	2.94588	5.43448	4.0321	4.57981	2.77997	2.59011
S100A6	7.38496	6.61746	6.47238	6.2747	4.54933	6.22327	3.90547	2.64603
S100A8	5.71114	1.07617	4.23094	2.84648	3.13202	1.70621	3.31107	1.89436
S100A9	7.12788	3.85501	6.89161	5.03194	5.04901	1.50112	4.59687	2.92641
S100B	3.17118	3.84672	4.85172	1.59926	3.53967	2.47438	2.24018	2.09243
S100P	4.84607	2.22604	4.68387	1.57057	3.21501	2.09006	2.37569	2.02157
SAA1	4.80839	3.02093	5.02552	1.0786	3.53162	1.554	2.06788	2.27595
SAA2	4.53838	3.01272	4.72521	1.78879	3.1167	2.40842	1.79357	2.11085
SAT1	7.65461	6.3499	4.22099	6.43015	3.90961	2.45667	3.66985	3.06122
SCG5	2.66912	3.32081	4.31572	2.11385	3.04985	2.97732	1.67745	2.01781
SCGB3A1	2.57301	3.78953	4.19151	1.7824	3.19712	1.11305	2.17414	2.05008
SEC23A	4.0228	5.05817	4.79523	3.93186	2.92668	4.4693	1.925	1.67875
SEC61G	6.09857	5.7333	3.2471	4.76168	3.24836	3.66837	1.65199	2.14716
SELENOP	6.45506	5.27008	2.31342	1.96032	4.10804	1.75503	2.57665	1.57894
SELL	2.20472	2.10701	4.09435	1.56848	3.01695	1.48531	2.36011	1.71884
SELPLG	2.51008	3.19859	4.25958	1.57442	3.19472	2.5492	2.61364	1.82902
SERPINA1	3.52734	1.58659	5.20792	1.28143	4.56406	0.655326	4.05128	2.45845
SERPINA3	3.38284	2.13228	4.72266	1.91476	3.53794	1.52869	1.55178	2.04899
SERPINB5	3.03332	2.28565	4.31703	2.95319	2.99413	2.2471	1.33186	1.79113
SERPINH1	5.41475	6.04452	4.8138	5.51193	4.06456	5.08776	1.93025	2.13499
SFN	5.10539	3.88367	5.20846	2.94669	3.42753	2.6499	2.3844	1.83393
SIGIRR	4.8449	4.31404	4.60721	1.46075	3.28929	2.72614	2.05698	1.07201
SLC2A1	8.41852	2.78766	2.34233	3.63361	2.8231	2.79342	1.63108	2.4534
SLC2A4	3.04748	3.11521	4.07585	2.59871	2.55063	2.81689	1.76004	1.73934
SLC40A1	3.53309	3.43882	4.31252	1.48646	3.79573	1.06862	3.11858	0.530597
SLPI	8.37939	2.44425	6.46904	3.10312	3.55293	1.14985	2.3337	2.89854
SMAD2	5.54681	5.55209	4.21063	5.28634	3.11867	3.77855	2.15426	2.01894
SMAD3	3.52917	4.3575	4.13579	2.59226	3.08937	3.33628	1.50344	1.53081
SMAD4	4.08399	5.27603	3.09759	4.35048	3.18487	2.29025	1.72423	1.39502
SMARCB1	4.98013	6.44927	4.07216	3.8773	1.89965	4.26365	1.3345	2.36703
SMO	2.78482	4.94678	3.92128	2.78407	2.72622	3.52612	1.20719	2.15345
SNAI1	3.3222	3.84383	5.02872	2.21882	3.68871	3.40992	2.08116	2.62638
SNAI2	2.6993	4.66474	4.41291	5.16798	3.35851	4.09712	1.4253	2.58116
SOD1	4.0727	6.12951	3.54693	4.49933	3.16875	4.36299	2.21983	2.14409
SOD2	7.20718	3.24042	6.33446	7.7103	4.09654	2.85234	3.41882	4.75518
SOSTDC1	1.42096	4.33427	4.68051	1.54649	2.78425	2.66651	1.12781	2.21048
SOX2	3.96096	3.78712	4.95152	2.21808	3.3087	2.54383	1.71367	2.63768
SOX4	7.02743	7.97363	5.71472	5.27527	3.02231	4.71903	1.07584	3.07409
SOX9	7.15155	5.03413	5.58608	1.59671	3.20812	3.64918	1.16154	2.31412
SPARCL1	3.33328	2.77942	4.50592	4.97207	4.41748	2.41596	2.1923	1.66096
SPINK1	3.15802	1.67621	4.16225	1.17822	2.46441	2.17652	1.56151	1.89128
SPOCK2	2.86672	3.53001	4.40627	1.94271	3.28984	2.5267	1.61675	1.94616
SPP1	5.32215	2.17825	5.55057	5.54026	2.61846	3.30635	2.86897	3.5879
SPRY2	6.34081	5.47143	2.70022	3.71157	3.52647	2.43926	1.86688	2.17365
SPRY4	6.0455	5.94992	5.60457	5.01591	2.8309	4.24097	1.40074	1.89675
SQSTM1	7.10367	5.47894	6.07134	6.04431	4.08776	5.09884	2.7575	3.01973
SRC	5.23343	5.3354	4.42993	4.33767	3.62563	2.8995	2.10359	2.47994
SREBF1	2.39208	4.7285	5.08453	3.4353	3.31598	3.06872	2.59005	1.85706
SRGN	1.7977	3.43615	5.26909	4.09438	4.4976	0.958624	4.30747	3.75468
SST	3.53977	2.90349	4.27532	1.37219	2.99247	1.58996	0.96759	1.92995
ST6GAL1	5.14846	3.5317	4.3445	1.82417	3.01394	2.57974	1.31396	2.21753
ST6GALNAC3	2.94347	3.31481	4.14281	2.36591	2.75747	2.52037	1.93771	1.5853
STAT1	2.36533	4.53996	6.59606	6.23658	2.42382	2.05665	2.82305	2.11479
STAT3	5.74203	5.85844	3.35049	5.51568	3.3681	4.37999	2.56427	2.43729
STAT4	2.76372	3.22636	4.36181	3.40448	3.23165	1.06393	2.22815	1.66636
STAT5A	3.89781	3.63415	4.3906	1.61983	2.94946	3.4899	2.17657	1.82282
STAT5B	4.19406	4.48471	3.75644	3.48191	2.75797	3.32506	1.93466	1.28884
STAT6	5.52154	6.1512	5.19301	4.70902	3.49466	2.20002	2.27879	1.98108
STMN1	3.74238	7.1862	3.41059	3.60236	1.91112	4.63318	2.00787	2.21837
SUCNR1	2.60378	2.05112	4.27326	0.931343	2.90522	1.63814	2.47715	1.63481
SYK	2.25511	4.9674	2.19514	2.05377	3.14969	1.94499	2.23989	1.25901
TACSTD2	6.58129	1.13337	6.07767	2.60481	3.2465	1.5317	2.27405	1.92395
TAGLN	1.7933	2.43757	5.0452	2.24169	4.70584	6.72491	2.4718	1.35999
TAP1	2.53177	2.53472	5.89572	4.6083	2.95935	3.31897	2.64102	2.10637
TAP2	1.92783	2.78535	6.16044	4.89091	3.25129	2.87902	2.67584	1.78786
TBX21	3.40244	2.64313	4.16078	2.3072	2.87911	1.85349	1.77172	1.52736
TCL1A	2.88445	2.65796	4.42875	1.96029	2.90206	2.64247	0.978498	2.2345
TEK	2.25391	2.38151	4.19847	1.94142	2.66193	2.50709	1.57712	1.81859
TFEB	4.33217	2.7808	4.11748	3.0399	2.78627	2.52072	1.44865	1.70468
TGFB1	4.41309	2.57494	4.73354	3.68212	3.75852	4.00937	2.86069	1.49478
TGFB2	1.9041	5.61798	2.39814	1.99395	3.0313	3.83223	1.61137	2.34195
TGFB3	3.47211	3.8346	4.71054	5.40569	3.62023	1.60213	1.8563	2.08123
TGFBR1	3.3021	5.34584	3.76694	4.07226	2.56003	4.0269	2.05853	1.98098
TGFBR2	3.26744	5.29365	2.36291	3.96811	4.3514	3.98428	2.6793	1.81601
THBS1	4.26934	1.92324	5.0386	2.72097	5.78372	4.87188	2.81051	1.36111
THBS2	3.42255	3.36114	5.10475	6.15761	2.51002	6.40042	1.70142	2.27294
TIE1	2.37296	3.54657	4.3134	1.90479	3.01701	2.36504	1.59115	1.71204
TIGIT	2.62289	2.40475	4.50424	1.1656	2.84822	2.89977	1.63606	1.84503
TIMP1	1.89042	1.43704	5.31646	3.91785	6.59494	5.93255	3.8062	2.45625
TLR1	3.29569	2.47485	4.31134	2.36792	3.11399	2.26633	2.42214	1.63428
TLR2	3.30704	2.87208	4.76276	3.62336	2.95183	3.06178	3.13839	2.33014
TLR3	3.01791	2.7272	4.2883	2.93479	2.97682	1.87963	1.63686	1.81703
TLR4	2.82832	2.31358	4.20791	3.77988	3.07057	1.54814	2.72768	1.96067
TLR5	2.99621	3.67296	4.60912	1.45307	3.21279	1.79563	1.1995	2.17315
TLR7	2.68887	2.4034	3.95209	1.63701	2.66996	2.02892	1.84525	1.28108
TLR8	3.07254	2.29098	4.0452	1.15809	2.46608	2.33004	1.60308	1.66489
TM4SF1	6.57624	4.41711	5.41448	2.89697	3.66689	2.41836	1.64526	2.09668
TNF	5.56887	1.26874	4.9907	1.78306	2.99052	1.55434	2.45792	1.88032
TNFAIP6	3.85515	2.28863	4.74032	5.07406	2.11774	3.69661	2.03255	2.47167
TNFRSF10A	3.66417	3.1496	3.96667	1.71344	2.23696	2.27324	1.6431	0.507355
TNFRSF10B	5.4226	3.89687	4.8439	4.33944	3.37777	3.36948	2.38281	1.34437
TNFRSF10D	5.25446	3.35582	4.55711	3.96672	3.23018	3.02067	2.21045	2.16375
TNFRSF11A	4.4712	3.12774	4.40221	1.37475	2.72895	2.81114	1.57048	1.89314
TNFRSF11B	5.02503	2.95704	4.5062	2.57914	2.7687	3.60208	1.394	1.98175
TNFRSF12A	6.78131	5.33939	6.89963	3.09557	4.69458	5.49742	3.68782	3.079
TNFRSF13B	2.95936	2.28618	4.09642	1.61112	2.71191	2.54662	1.3487	1.40605
TNFRSF14	3.91879	3.595	5.29003	4.4817	4.10227	2.07541	3.21958	2.82196
TNFRSF17	2.48074	2.37805	4.16831	1.47151	2.71497	2.35513	1.41141	1.64935
TNFRSF18	3.82006	4.00191	5.26932	2.6743	3.68707	2.67281	2.07479	2.72673
TNFRSF19	3.17923	5.11138	3.54091	1.23886	3.42028	4.65487	1.00481	1.88106
TNFRSF1A	4.49372	5.33903	5.17899	4.6458	3.64226	5.02577	3.34727	1.77235
TNFRSF1B	2.73047	2.83981	4.66915	3.41132	3.49374	2.82071	2.68288	2.53861
TNFRSF21	3.94721	5.06728	4.04825	5.41695	1.93119	2.86456	1.66044	1.76547
TNFRSF4	3.16076	2.5355	4.4276	1.22241	3.17188	1.79539	1.07627	2.06696
TNFRSF9	3.67069	2.18078	4.70058	2.14714	2.88496	2.66275	1.90363	1.91485
TNFSF10	5.72242	2.22449	5.97011	4.53495	3.29589	1.82011	2.42827	2.22987
TNFSF12	3.01209	3.24703	4.26159	3.1651	3.2213	2.7017	2.40214	1.73421
TNFSF13B	2.99018	3.27409	4.24726	2.95081	3.42349	1.46586	2.36961	1.31941
TNFSF14	3.46962	3.54094	4.50009	1.72739	3.01524	2.92897	1.90567	2.32856
TNFSF15	2.7815	1.77678	4.34833	1.48347	2.44072	2.5466	1.18259	1.70202
TNFSF18	2.55388	1.82438	4.39192	1.4444	2.66709	1.9749	1.64913	1.82495
TNFSF4	1.48136	3.15817	5.23693	1.11169	2.79107	3.14921	1.6821	1.87731
TNFSF8	3.4007	2.34073	3.98693	1.1298	2.64419	2.30538	2.13	1.15695
TNFSF9	3.56022	3.16397	4.88077	2.5178	3.52828	2.31784	2.198	2.22594
TOP2A	2.15866	5.79687	3.83551	2.02483	3.19365	3.42236	2.18212	1.49162
TOX	2.88825	3.49377	4.17333	1.33706	2.60197	3.00622	1.94476	1.73757
TP53	5.5639	5.65467	2.95622	3.96188	2.66912	3.29596	1.99369	1.32376
TPM1	5.71017	4.81841	5.66561	2.65881	4.60287	5.92178	2.31111	1.97367
TPM2	6.75026	5.12563	6.09886	3.73599	4.79993	6.8456	2.75315	1.86309
TPSAB1	3.42279	2.77838	4.56459	1.51671	2.72463	3.18383	1.28612	2.32554
TPSB2	2.79637	2.76414	4.37328	1.63108	3.40395	2.43407	1.13317	2.52293
TSC22D1	4.35493	4.24453	4.33367	3.09487	2.85181	3.1282	2.06713	1.66978
TSHZ2	1.78497	2.7087	5.16798	4.5157	3.07074	3.41432	1.20971	2.36997
TSLP	2.03855	2.28896	4.33731	1.2653	2.43554	2.87039	1.35287	1.55245
TTR	3.73482	2.87051	4.02653	1.49014	2.79302	2.47959	1.81947	1.77991
TUBB	4.57038	7.67309	5.56862	5.07122	4.80244	5.81619	3.47477	3.11249
TUBB4B	2.88182	6.11434	3.78249	4.67427	3.80411	3.43893	2.85851	2.06451
TWIST1	2.11133	4.54605	4.61565	6.52731	0.752976	1.53405	1.44846	2.09571
TWIST2	2.96856	2.6331	4.43699	5.81098	0.745547	0.605742	1.17298	1.97408
TXK	2.88399	2.56484	4.2275	1.6882	2.79352	1.79259	1.22373	1.75535
TYK2	7.66946	7.33775	5.86461	6.0892	4.56656	4.43435	2.37295	4.11415
TYMS	1.46303	5.42101	3.38373	1.37531	3.08202	3.35761	1.48988	1.9142
TYROBP	3.94976	3.34665	4.78614	3.22849	3.45227	2.51886	3.31725	1.79248
UBE2C	3.01857	6.30495	4.43468	3.34861	3.54581	3.66236	2.23686	2.39057
UCP1	2.92479	2.93052	3.87566	1.21607	2.61452	2.57085	1.08409	1.73086
UPK3A	2.37646	2.42174	4.21739	1.43726	3.07876	2.6543	1.71979	1.59934
VCAM1	3.42343	1.31382	4.71439	3.91238	2.11761	4.82214	1.26568	1.65328
VCAN	1.66655	5.10231	4.86503	4.30787	2.9251	6.71252	2.71448	2.45226
VEGFA	9.40546	2.99917	2.97305	5.6094	3.45266	4.07429	0.948956	3.30011
VEGFB	4.55571	4.98414	4.01953	3.81289	3.59971	3.2903	2.9842	1.73871
VEGFC	3.16204	2.29651	4.52008	3.29401	3.53833	2.20695	1.82495	2.16326
VEGFD	2.81833	3.36464	4.21219	2.51167	2.80288	3.65255	1.26404	2.04081
VHL	6.00241	5.90131	5.88255	4.68674	4.28149	3.4182	3.28958	2.0728
VIM	6.94875	7.30959	4.16095	6.63026	5.07018	5.90385	3.49986	2.91772
VPREB3	3.65404	3.16278	4.4111	1.69232	2.55386	2.5679	1.49968	2.24614
VSIR	2.68226	2.37464	4.69318	3.03794	3.92546	1.31241	3.44443	0.592378
VTN	3.28497	2.82794	4.5401	1.39921	2.88298	2.94717	2.01367	1.83077
VWF	2.11079	3.4695	4.18373	2.39657	3.61122	2.05271	2.43945	0.890197
WIF1	4.80322	4.35363	5.94085	1.92742	4.52699	3.66186	3.74217	2.60053
WNT10B	2.52104	3.37352	4.64231	1.11388	2.79875	3.32471	2.08015	1.62123
WNT11	2.85525	2.28968	3.98608	1.93914	2.85012	2.65864	1.146	1.62501
WNT2	2.92875	2.50375	4.00223	2.81121	3.15972	2.0465	1.23849	1.88466
WNT2B	3.21233	2.14321	4.2667	2.34287	2.62588	2.26255	1.3035	1.80084
WNT3	3.23036	3.21214	4.588	3.04306	2.77599	2.47176	1.02137	2.03594
WNT5A	5.9584	5.28189	4.53885	6.04162	0.692156	3.9274	0.834163	2.04114
WNT5B	4.51765	4.86191	3.21841	3.15624	3.00727	2.84033	1.69036	2.30755
WNT7A	2.81757	6.17078	5.23561	1.81531	3.00238	3.02066	1.63351	2.02814
WNT7B	4.96466	4.01306	5.1607	2.58998	3.38149	3.70097	1.79945	2.36906
WNT9A	4.26451	4.13368	4.66659	1.67934	2.73395	3.32085	0.575362	2.33458
XBP1	4.36615	5.677	5.41205	4.60693	4.03118	4.16602	2.68171	2.11479
XCL1	3.09945	2.52851	4.53077	1.64419	2.93884	2.93913	0.731118	2.36101
XCL2	2.85959	2.18307	4.07911	1.23267	2.78072	1.69781	0.691084	1.86095
YBX3	6.81978	5.94624	5.28273	5.87822	3.9296	4.19298	2.33993	2.70535
YES1	5.75065	5.53669	3.68625	3.53581	2.99945	3.39182	1.57442	1.93097
ZFP36	6.16936	4.80518	5.65706	3.23392	5.62499	1.20199	4.3009	1.9708

## Sheet: S21
Supplementary Table S21: Neighboring cell types’ effects on gene module in the BRCA dataset
cluster	Tumor Module1	Tumor Module2	Tumor Module3	Fibroblast Module1	Fibroblast Module2	Fibroblast Module3	Neutrophlil Module1	Neutrophlil Module2
B-cell	0.0529517	-0.122992	0.0830953	-0.0823013	0.136227	-0.0446935	0.0196922	-0.0406349
NK	-0.0249311	-0.073669	0.15533	-0.0847358	0.125457	-0.000840376	0.0283819	-0.0602742
T CD4 memory	-0.183288	0.00861156	0.217159	0.0630207	-0.0553984	-0.0443847	0.0780167	-0.0527197
T CD4 naive	-0.0373073	-0.0426843	0.0507422	-0.0748288	0.193484	-0.042606	0.0229308	-0.00220991
T CD8 memory	-0.0384491	-0.0335728	0.241923	0.0764991	0.00159701	-0.059261	0.0504154	-0.0379143
T CD8 naive	-0.00653464	-0.22187	0.202846	-0.133385	0.170303	-0.0479943	0.044235	-0.0522367
Treg	-0.105639	-0.0673229	0.149113	-0.024793	-0.00231196	0.0194151	0.0830351	-0.0588425
endothelial	-0.0556649	-0.141414	0.228139	-0.0563224	0.211234	-0.088946	0.13981	-0.148724
epithelial	-0.0401784	-0.261989	0.28239	-0.24515	0.384682	-0.112982	0.08791	-0.113368
fibroblast	-0.245201	0.0871692	0.171982	-0.0224223	-0.108517	0.145211	0.154316	-0.138072
mDC	-0.0887505	-0.100189	0.0670454	-0.0933701	0.185107	-0.0507141	0.10259	-0.118714
macrophage	0.0280218	-0.0978303	0.142322	0.137992	-0.0424851	-0.120617	0.164896	-0.185696
mast	0.0718754	-0.0634715	0.0211067	-0.020861	0.0373586	-0.0321543	0.0123424	0.00763117
monocyte	-0.148515	-0.100046	0.22205	-0.06838	0.145877	-0.00445457	0.173261	-0.174602
neutrophil	0.202286	-0.495625	0.297355	-0.170065	0.269733	-0.068601	-0.191071	0.159994
pDC	-0.0311978	-0.104524	0.0469176	-0.0326619	0.0258243	0.0298123	0.0498898	-0.0515887
plasmablast	-0.1245	-0.098453	0.212722	-0.0942209	0.00164735	0.0891992	0.0735635	-0.0596773
tumors	0.00239569	0.0169368	0.00326082	0.0693154	-0.141875	0.0350393	-0.231112	0.215225
Self	-0.466537	0.539025	-0.00765295	-0.113625	0.0825431	0.0410231	-0.037689	0.0512047
